# Supplementary material
Source: PubMed Central journal article supplement (PMC9887540)
Supplement: NIHMS1861639-supplement-SD-_DILI.pdf [file NIHMS1861639-supplement-SD-_DILI.pdf]

| smile                    | dili |   |
|--------------------------|------|---|
| CNCC[C@@H]               |      | 1 |
| CN1CCC[C@H]1             |      | 0 |
| CN(C)CCCN1C              |      | 1 |
| CN1CCN(CC1)              |      | 1 |
| NC(=O)C([C@H])           |      | 0 |
| CNCC[C@H](C)             |      | 1 |
| CNC1(CCCCC1)C            |      | 0 |
| CC(N)COc1c(C)cc(C)cc1    |      | 1 |
| CCN(CC)CC#C              |      | 0 |
| CN(C)C(=O)C              |      | 0 |
| Nc1nc2ccc(O)cc2n1        |      | 1 |
| CC[C@H]1OC(=O)C1         |      | 1 |
| CN(C)CCOC(=O)C           |      | 0 |
| Oc1ccc2C[C@H](O)C2       |      | 0 |
| CNCCC=C1c2ccc(C)cc21     |      | 1 |
| C[C@H](Cc1ccc(C)cc1)C    |      | 0 |
| NC(=O)N1c2ccc(C)cc2N1    |      | 1 |
| CCN(CC)CC(=O)C           |      | 0 |
| CN(C)C(=O)C              |      | 0 |
| CC(C)[C@H](O)C           |      | 1 |
| CC(=O)OCC(N)C            |      | 0 |
| CCCCNc1ccc(C)cc1         |      | 0 |
| OC(=O)Cc1ccc(C)cc1       |      | 1 |
| CNC(C)C(O)c1ccc(C)cc1    |      | 0 |
| OCC(NC(=O)C)C            |      | 0 |
| CC(C)NCC(O)C             |      | 0 |
| Cc1ccnc2N(C)CC2c1        |      | 1 |
| Nc1ccc(cc1)S(=O)(=O)1    |      | 1 |
| CCOC(=O)c1ccc(C)cc1      |      | 0 |
| Cn1cnc2n(C)ccc2n1        |      | 0 |
| CS(=O)(=O)N              |      | 1 |
| CC(C)NNC(=O)C            |      | 1 |
| CN1CCCCC1C               |      | 0 |
| COc1ccc(Cc2ccc(C)cc2)cc1 |      | 1 |
| O=c1[nH]cnc1             |      | 1 |
| CCCCc1oc2cc(C)cc2c1      |      | 1 |
| OC(CCN1CCC1)C            |      | 0 |
| OC(=O)c1cn(C)ccc1        |      | 1 |
| Cn1cc[nH]c1C             |      | 1 |
| OC(=O)Cc1ccc(C)cc1       |      | 1 |
| CCC1(C(=O)N)CC1          |      | 0 |
| OCC(O)C(O)C              |      | 0 |

|              |   |
|--------------|---|
| O=C(CCNNC(   | 1 |
| CC(=O)Nc1cc  | 1 |
| Cc1cc(no1)C( | 1 |
| Fc1c[nH]c(=C | 0 |
| NC(=O)NO     | 1 |
| CCN(CC)C(=S  | 1 |
| Cc1nnc(NS(=  | 0 |
| CN(C)CCOC(c  | 0 |
| Nc1ncn(C2O(  | 1 |
| Cc1ncc2CN=(  | 0 |
| NNC(=O)c1cc  | 1 |
| OCCN(C(=O)(  | 0 |
| CCc1oc2cccc  | 1 |
| Cc1oncc1C(=  | 1 |
| CC(C)(C(=O)c | 0 |
| Cc1ncc(CO)c( | 0 |
| OC(=O)c1ccc  | 1 |
| COc1cc(NC(C  | 0 |
| CN1C(c2cccc( | 1 |
| C[N+]1(C)CC( | 0 |
| CNC1(C)C2CC  | 0 |
| COc1ccc(OC)  | 0 |
| CC(C)NCC(O)  | 0 |
| CN1CC(c2ccc  | 1 |
| OC(=O)COC(=  | 0 |
| CC(=O)N(O)C  | 0 |
| CC[N+](CC)(C | 0 |
| NCCc1ccc(O)  | 0 |
| Cc1ccc(cc1)N | 0 |
| CC[N+](C)(C) | 0 |
| CNCCCC1c2cc  | 0 |
| CC(C)[N+](C) | 0 |
| CN1C2CC(CC:  | 0 |
| NC(=N)NCCN   | 0 |
| CCN(CC)CCO(  | 0 |
| C[N+]1(C)CC( | 0 |
| COc1cccc1C   | 0 |
| CN1C(=O)OC   | 1 |
| CN1CCN(CC1   | 0 |
| CN(C)CCOC(c  | 0 |
| CC(C)(C)NCC( | 0 |
| Clc1ccc(OCC( | 1 |
| CCCSc1ccc2n  | 1 |

|              |   |
|--------------|---|
| COc1cc2nc(n  | 0 |
| COc1ccc2CC3  | 0 |
| COc1ccccc1C  | 0 |
| C[N+](C)(C)C | 0 |
| C[N+]1(C)C2( | 0 |
| CN(C)CCOC(C  | 0 |
| CC(C)NCC(O)  | 0 |
| CCCCCCCCNC   | 1 |
| OC1=NC(=O)   | 1 |
| CC(COc1cccc  | 0 |
| CC(N)C(=O)C  | 1 |
| CCc1oc2cccc  | 1 |
| NC[C@H](O)   | 0 |
| CC#C[C@]1(C  | 0 |
| CCN1CC(CCN   | 0 |
| CC(C)CCC[C@  | 0 |
| CNC(=O)c1cc  | 1 |
| CC(=O)O[C@   | 0 |
| NCC[C@H](C   | 0 |
| OC(=O)COc1   | 1 |
| ONC(=O)CCC   | 0 |
| OC(Cn1cncn1  | 1 |
| CC1(C)NC(=O  | 1 |
| C[C@](O)(CS  | 1 |
| NC[C@H]1O    | 0 |
| CC(C)(C)NC(= | 0 |
| C[C@]12CC(C  | 1 |
| CCOC(=O)C1(  | 0 |
| NCCc1ccc(O)  | 0 |
| CC(=O)Oc1cc  | 0 |
| Clc1ccc2nsc  | 1 |
| C[C@H](N)C   | 0 |
| COc1cc(ccc1  | 1 |
| CC(C)C(=O)N  | 1 |
| OC[C@H]1O(   | 0 |
| CNC(=O)Oc1   | 0 |
| CN1CCCN=C1   | 0 |
| CN[C@@H](i   | 0 |
| CCN(CC)C(=O  | 1 |
| CC[C@@H](C   | 0 |
| C[C@]12CC(C  | 1 |
| Oc1ccc2c(Oc  | 0 |
| CN(C)CC[C@   | 0 |

|                    |   |
|--------------------|---|
| OCCN1C[C@H]1       | 0 |
| CN(C)CCc1c1        | 0 |
| C[C@@H](c1         | 1 |
| COc1cc2CC[N]       | 0 |
| FC(F)(F)[C@H]1     | 1 |
| NC(=O)[C@@H]1      | 0 |
| CCC(C)CCCC         | 0 |
| CO[C@@H]1          | 0 |
| COc1ccc(C[C@H]1    | 0 |
| CC(N)C12CC3        | 0 |
| COCCOc1cc2i        | 1 |
| CN1CCC(CC1)        | 1 |
| CC(=O)N1CC1        | 1 |
| CN1CCCC(CN1)       | 1 |
| OCC(O)COC(=O)      | 1 |
| C[N+](C)(C)C       | 0 |
| C(C(C(C(C(CO       | 0 |
| NCCCCC(O)=         | 0 |
| CC(=O)Nc1nr        | 1 |
| CC(C)C1NC(=O)      | 1 |
| NCCCC(O)(P(=O)(O)C | 0 |
| CC(=O)Nc1c1        | 0 |
| NCCCNCCSP(=O)(O)C  | 0 |
| Cn1c2nc[nH]1       | 0 |
| Cn1cnc(c1Sc1)C     | 1 |
| C1=CC=C(C=C1)C     | 1 |
| CC(C[N+](C)(C)C    | 0 |
| C1CCN(CC1)C        | 0 |
| CC(=O)Oc1cc1       | 0 |
| CS(=O)(=O)C        | 1 |
| CCCC(C)(COC(=O)C   | 0 |
| CN(C)CCC(C1        | 0 |
| Oc1nc2cc(Cl)cc2    | 1 |
| CC(=O)Oc1cc1       | 1 |
| C1C(=O)NC(=O)C1    | 1 |
| OC(=O)c1cc1        | 1 |
| C(C(CS)S)O         | 0 |
| CCCC(CCC)C(=O)C    | 1 |
| Fc1ccc(cc1)C       | 0 |
| Cn1c2ncn(CC2)C     | 0 |
| Clc1ccc-2c(c1)C    | 0 |
| CC[C@@H](C)C       | 1 |
| CCc1cccc2c3c1      | 1 |

|               |   |
|---------------|---|
| NC(=O)OCC(    | 1 |
| Oc1ccc(cc1)C  | 0 |
| CC(C(O)=O)c:  | 1 |
| CC(C)(C1=CC=  | 0 |
| Cc1c(oc2c(cc  | 0 |
| CCOC(=O)c1r   | 0 |
| Cc1ccc(C)c(O  | 1 |
| C1CN(CCN1C    | 0 |
| COc1ccc2n(C   | 1 |
| CC(CCc1cccc   | 1 |
| Nc1nnc(c(N)i  | 1 |
| CCOC(=O)N1    | 0 |
| CC1=CC(=CC=   | 0 |
| Cc1cccc(Nc2c  | 1 |
| CCOC(=O)C1(   | 0 |
| CCCC(C)(COC   | 0 |
| CN(C)C(=N)N   | 0 |
| Cc1ncc(n1CC   | 0 |
| Nc1cc(nc(=N   | 0 |
| C1=CC=C(C(=   | 0 |
| CC(C)c1cc(O   | 1 |
| CCC1=NN(C(=   | 1 |
| C1C(C(C(C1    | 0 |
| C(C(CO[N+])(= | 0 |
| CC12CCC3C(C   | 1 |
| Nc1nc(O)c(o   | 1 |
| CC(C)(CC1=C   | 0 |
| CC1=C(C(=O)   | 0 |
| C1CCC(CC1)C   | 0 |
| C1C(=S)N(C2   | 0 |
| Oc1ccc(cc1)-  | 0 |
| CN1CCN(Cc2c   | 1 |
| CC1=C(C2=C(   | 1 |
| CC(C)(C)C#CC  | 1 |
| c1nc(cs1)-c2i | 1 |
| C1CN(CC2=C:   | 1 |
| NCC1CCC(CC:   | 0 |
| CC(\C=C\C1=   | 1 |
| Cc1c(C)c2OC   | 1 |
| C1CC[N+](C    | 0 |
| CCN(C(C)=O)   | 0 |
| CC(=O)OCC(=   | 0 |
| [H][C@]12CN   | 0 |

|              |   |
|--------------|---|
| C[C@]12C[C@] | 0 |
| COC1C(CC2C)  | 0 |
| CNCC(C1=CC)  | 0 |
| CC12CCC3C(C  | 1 |
| N[C@@H](C)   | 0 |
| CN1CCc2cccc  | 0 |
| CC12CCC3C(C  | 1 |
| Nc1nc2ncc(C  | 0 |
| Nc1ccn([C@]  | 1 |
| CC1(O)CCC2C  | 1 |
| CC1(CC(=O)N  | 0 |
| CN1C2CCC1C   | 0 |
| CC1(C)S[C@]  | 0 |
| [O-][N+](=O) | 0 |
| CCN(CC)C(C)  | 0 |
| OC(=O)c1cc(i | 1 |
| CCC(CO)NC(=  | 0 |
| [H][C@@]1(i  | 1 |
| CC1(C(=O)N2  | 0 |
| C[N+](C)(C)C | 0 |
| Nc1ccc(cc1)S | 1 |
| OC[C@H]1O    | 0 |
| CC(=O)N[C@   | 0 |
| CCC1C(C(C(C  | 1 |
| [H][C@@]12   | 0 |
| CC[C@]1(O)(  | 0 |
| Fc1ccc(cc1)C | 0 |
| CC12CCC3C(C  | 1 |
| Cc1cn([C@@   | 1 |
| CC1(C(=[N+]( | 0 |
| CN[C@H]1[C   | 0 |
| CN(C)CCCC1C  | 1 |
| CC(=O)OC1C   | 0 |
| C[C@]12CC[C  | 1 |
| CC(=O)N1C2=  | 1 |
| CC1C(C(CC(O  | 0 |
| COc1cccc2C(  | 0 |
| C1=NC2=C(N   | 0 |
| [H]OC([H])([ | 0 |
| CC1=C(C2=C(  | 1 |
| C1CC2=CC=C   | 1 |
| Cc1cn(C2CC(I | 1 |
| CC(C1=CC(=C  | 1 |

|              |   |
|--------------|---|
| CC(CCC1=CC=  | 0 |
| CC(C)(C)NCC( | 0 |
| C[C@](N)(Cc  | 1 |
| COc1ccc(cc1) | 1 |
| CC(=O)OC1C   | 0 |
| CC(C1=CC2=C  | 1 |
| C1=CC(=C(C=  | 1 |
| C1C(C(OC1N;  | 1 |
| CCC12CC(=C)  | 1 |
| CCC(=O)N(C1  | 0 |
| C[N+]1(CCC2  | 0 |
| OC[C@@H]1    | 1 |
| CCC(=O)N(C1  | 0 |
| CCCCN1CC(C   | 0 |
| CN(CC(=O)O)  | 1 |
| CCCC(CCC)C(  | 1 |
| C1C(N(C2=C   | 0 |
| CCNC(=O)N(   | 0 |
| CCCN(CCC)C   | 1 |
| CCC(C)N1C(=  | 1 |
| CNCC(C(C(C   | 0 |
| C1=CC=C(C=C  | 1 |
| CC1=C(C2=CC  | 0 |
| CC(C)NCC(CC  | 0 |
| CC(N(O)C(N)  | 1 |
| CC[C@@]1(C   | 0 |
| CC(CN1CCN(   | 0 |
| C1=CN(C(=O)  | 1 |
| CCCCCCCN(C   | 0 |
| CC1=CC(=C(C  | 0 |
| CC(C)c1c(C=  | 1 |
| CCCCCN(C)CC  | 0 |
| C1=CC(=CC=C  | 0 |
| CCCCS(=O)(=  | 0 |
| Nc1ncnc2n(c  | 0 |
| CCC(C)C1C(=  | 0 |
| C1C2C(C2N)C  | 1 |
| CCCC1OC2CC   | 0 |
| C(N1CCCNCC   | 0 |
| CCCC1(CC(=O  | 1 |
| C1CC1NC2=N   | 1 |
| CC1=CC(=C(C  | 1 |
| CN1C2=C(C3=  | 1 |

|               |   |
|---------------|---|
| C1=CC(=CC=C   | 1 |
| CC(C)NC1=N    | 1 |
| CN(CCOc1ccc   | 0 |
| C(CNCCNCCN    | 0 |
| CC1=NC(=CN    | 1 |
| Clc1ccc(cc1)[ | 1 |
| CNC1CCC2=C    | 0 |
| Cc1cc2c(cc1C  | 1 |
| CC(C)C[C@@    | 1 |
| COc1cccc1C    | 1 |
| CCCCOCC(CN    | 1 |
| CC1=C(C(=O)   | 0 |
| C1=NC2=C(N    | 1 |
| CN(C)CCc1c[r  | 0 |
| C1CC2C(=O)N   | 0 |
| COc1cc2ncnc   | 1 |
| CN(Cc1cnc2n   | 1 |
| CCOc1cccc1    | 0 |
| CC(C)COc1cc   | 1 |
| CC(CCCC(C)(C  | 0 |
| CC[C@@H])([   | 1 |
| C[C@H]1COc    | 1 |
| Cc1ccc(Nc2c[  | 1 |
| CC12CCC3C(C   | 0 |
| CC1CCN(C(C1   | 0 |
| C=C1C(CC(C1   | 1 |
| CC(C1=CC=CC   | 0 |
| C1CC(CCC1O[   | 0 |
| C1C(C(C(C(C1  | 0 |
| CCCCCO1=C     | 1 |
| CN1[C@H]2C    | 0 |
| CC1=CC(=CC(   | 1 |
| CCCCN(CCCC)   | 1 |
| CCC(=O)NCC(   | 0 |
| CS(=O)(=O)C   | 1 |
| [H][C@]1(CC   | 1 |
| Cc1cccc1C(=   | 1 |
| CCC(C)CCCC    | 0 |
| CNC(=O)C1=(   | 0 |
| CCC1=C(C2=C   | 1 |
| CC[C@H](C)[   | 0 |
| CCC(C)C1C(=   | 0 |
| COc1cc(OC)c   | 1 |



|              |   |
|--------------|---|
| CC1C(C(CC(O  | 0 |
| CC1C(C(C(C(C | 1 |
| CC1C2CC3=C   | 0 |
| C[C@](N)(Cc  | 0 |
| CC(C)COC(=O  | 0 |
| COCCNC(=O)   | 0 |
| CCC(C)CC(C)C | 1 |
| CC1=C(C=C(C  | 1 |
| CCCCC(C1(CC  | 0 |
| CCCc1cc(=O)  | 1 |
| C1=NC2=C(N   | 1 |
| CC\C(c1cccc  | 1 |
| CC(C)c1nnc(C | 1 |
| CN(C)CC1=CC  | 1 |
| CCCCCCCCC    | 1 |
| CCCCCOC1=C   | 1 |
| C=CCN.C1C(C  | 0 |
| Cc1ccc(cc1)C | 1 |
| CC(C)C(C)C=C | 0 |
| CN(C)[C@H]:  | 1 |
| CCN(CC)C(=O  | 0 |
| CC(C)(C)NCC  | 1 |
| CN1CCC23C4   | 0 |
| CCCCC(C)(C=  | 0 |
| CCCCC(C)(C   | 0 |
| CN1CCC23C4   | 0 |
| CN1CCC23C4   | 0 |
| CCN(CC)CCN   | 1 |
| CN(C)N=Nc1   | 1 |
| CC=C1C(=O)N  | 0 |
| Oc1cn(N=Cc2  | 1 |
| C1=CC=NC(=O  | 1 |
| C1CC(C1)CN2  | 0 |
| C1CCC2(C3CC  | 0 |
| CC(C)(C)NC(= | 1 |
| CC1C=CC=C(C  | 1 |
| CC1=CC2=C(C  | 0 |
| CCC1C2(C(C   | 1 |
| CC(C)CC(CC(= | 0 |
| CC1CN(CCC1   | 0 |
| C1=CC(=C2N   | 1 |
| CC(C)C(CC1=  | 0 |
| CC1C=CC=C(C  | 1 |

|               |   |
|---------------|---|
| OS(=O)(=O)C   | 0 |
| CCCCCCCCC=C   | 0 |
| CO[Si](C)(C)C | 0 |
| CCC1C(=O)N(   | 1 |
| CC1=CC(=C(C   | 1 |
| CNCC(C(C(C(   | 0 |
| CC(C(=NO)C)   | 0 |
| CCOC(=O)CN    | 1 |
| C1CCC(C(C1)I  | 1 |
| CC1=C(C=C(C   | 1 |
| CC(=O)OC1=C   | 0 |
| CC1C=CC=CC    | 0 |
| O=N[Fe--](C   | 0 |
| CC(C)C(C(=O)  | 0 |
| CCC(C)C(C(=C  | 0 |
| CCC(C)C(C(=C  | 0 |
| CCNC(=NCCC    | 0 |
| C1C2CC2N(C:   | 0 |
| CCC(C)C1C(=   | 0 |
| Nc1ccc(C(O):  | 1 |
| CC(=O)Oc1cc   | 0 |
| OC(Cn1ccnc1   | 0 |
| CC1=C(C=C(C   | 1 |
| CC(CC1=CC=C   | 0 |
| CC(C)C1=C(C   | 0 |
| C1=CC(=C(C(   | 1 |
| C1CCC(CC1)C   | 1 |
| CC(C(=O)NC    | 1 |
| CC(C)Cc1ccc   | 1 |
| CCOC(C(=O)C   | 1 |
| CC(=O)Oc1cc   | 1 |
| C1CN(CCC1C    | 1 |
| CC(COC1=CC=   | 1 |
| CN(C)CC=C(C   | 1 |
| CC(C1=CC=CC   | 1 |
| OC(=O)Cc1cs   | 1 |
| CC1=CC2=C(C   | 1 |
| C(C(C1C(=C(C  | 0 |
| CC(COC1=CC=   | 0 |
| CC1=C(SC=[N   | 0 |
| CN(C)CCC(C1   | 0 |
| CC(CC1=CC=C   | 0 |
| CN1CCC23C4    | 0 |

|               |   |
|---------------|---|
| CC1C(OCCN1    | 0 |
| N[S+](O-):    | 0 |
| CC(O)(P(O)(C  | 0 |
| CCC(C1=CC(=   | 0 |
| CC(CC1=CC=C   | 0 |
| CC(C)CC(C(=C  | 0 |
| C(CC(=O)[O-]  | 0 |
| CC(C)C(=O)O   | 0 |
| CN1CCC23CC    | 0 |
| Cc1ccc(cc1)C  | 0 |
| C=CC1=CC=C    | 0 |
| CC(C(C1CNC2   | 0 |
| Cc1cc2nc3c(r  | 0 |
| CC(C)(CO)N.C  | 0 |
| C(CC(C(=O)O   | 0 |
| CC(C)(CO)C(C  | 0 |
| Nc1ccc(cc1)C  | 0 |
| CCC(C)C(C(=C  | 0 |
| CC(=O)NC1=C   | 0 |
| CC(C(=O)[O-]  | 0 |
| CSCC[C@H](I   | 0 |
| Cl[Cu]Cl      | 0 |
| CCC(C)C(C(=C  | 0 |
| CCC(C)C1C(=C  | 0 |
| CCC(C)C(C(=C  | 0 |
| CCC(C)C(C(=C  | 0 |
| C[N+]1(CCC2   | 0 |
| CCCC(=O)OC    | 0 |
| Cn1c(CCCC(O   | 0 |
| C[Si]12OCCN   | 0 |
| C1=C(NC=N1    | 0 |
| OC(=O)CN(C    | 0 |
| C(C(F)(F)F)(C | 0 |
| CC1=NC2=C(I   | 0 |
| CC1(C(NC(S1   | 0 |
| C1=CC=C(C=C   | 0 |
| CN(C)C1=CC(   | 0 |
| OC(=O)c1c(l)  | 0 |
| CSCC[C@H](I   | 0 |
| CC(=O)OC1(C   | 0 |
| C1CC(N(C1)C   | 0 |
| C1C(N(C2=C    | 0 |
| CN1C(CNC2=    | 0 |

|                          |   |
|--------------------------|---|
| <chem>C1=C(C(=O)N</chem> | 1 |
| <chem>CC1=C2CCC(=</chem> | 1 |
| <chem>CC(=O)NC1C(</chem> | 1 |
| <chem>CCOC1C(CC(=</chem> | 1 |
| <chem>CCCCN1C(=O</chem>  | 1 |
| <chem>CON=C(C1=C</chem>  | 1 |
| <chem>COc1cccc2O(</chem> | 1 |
