# Supplementary material
Source: PubMed Central journal article supplement (PMC9887540)
Supplement: NIHMS1861639-supplement-SD-ToxDILI.pdf [file NIHMS1861639-supplement-SD-ToxDILI.pdf]

| smiles                                                      | herg | pld | ames | mmp | dili |
|-------------------------------------------------------------|------|-----|------|-----|------|
| <chem>Cc1cc(N)ccc1c2ccc(O)cc2</chem>                        |      |     |      | 1   |      |
| <chem>C=CCN(CC=C)C1C(N2C3C2c4ccccc4c5ccc</chem>             |      |     |      | 0   |      |
| <chem>OC(Cn1ccnc1</chem>                                    | 0    | 0   |      |     | 0    |
| <chem>C(=N\c1snc2ccccc12)/c3ccccc3</chem>                   |      |     |      | 0   |      |
| <chem>NC1=NC(=O)N(C=C1O)C2OC(CO)C(O)C2</chem>               |      |     |      | 0   |      |
| <chem>Cc1cnc2cc(CO)c3c(nc(N)n3C)c2n1</chem>                 |      |     |      | 1   |      |
| <chem>CC1(C)OC1COc2c3OC(=O)C=Cc3cc4ccoc:</chem>             |      |     |      | 0   |      |
| <chem>COc1ccc2c(c </chem>                                   | 0    | 0   |      |     |      |
| <chem>CN(C)[C@H]1[C@H]2C[C@H]3C(=C(O))[C</chem>             |      |     |      | 0   |      |
| <chem>CNC[C@@H](O)c1cccc(O)c1</chem>                        |      |     |      | 0   |      |
| <chem>Clc1ccc2Sc3c</chem>                                   | 1    | 1   |      |     |      |
| <chem>CCCCCCCCCCCCCCCC(=O)OC\C=C(/C)\C=C\C=C(/C)\C=C</chem> |      |     |      |     | 0    |
| <chem>ClC=CCl</chem>                                        |      |     |      |     | 0    |
| <chem>OC1C2OC2c3c(ccc4ncccc34)C1O</chem>                    |      |     |      | 0   |      |
| <chem>OC(=O)c1ccc(cc1)[N+](=O)[O-]</chem>                   |      |     |      | 1   |      |
| <chem>Cc1ccc(cc1)C2(O)CCN(CCCC(=O)c3ccc(F)cc3)CC2</chem>    |      |     |      |     | 0    |
| <chem>CN1CCN(CC1)C2=Cc3ccccc:</chem>                        |      | 0   |      |     |      |
| <chem>OCc1ccccc1[N+](=O)[O-]</chem>                         |      |     |      | 0   |      |
| <chem>O=C(Nc1ccccc1SSc2ccccc2NC(=O)c3ccccc3)c4ccccc4</chem> |      |     |      |     | 1    |
| <chem>C[N+](C)[C@H]2CC[C@@H]1CC(C2)OC(=O)C(CO)c3c</chem>    |      |     |      |     | 0    |
| <chem>CC(=O)N(O)c1ccc2ccccc2c1</chem>                       |      |     |      | 1   |      |
| <chem>CN1C(=O)N(c</chem>                                    | 0    |     |      |     |      |
| <chem>c1ccc2c(c1)ccc3cc4ccc5ccccc5c4cc23</chem>             |      |     |      | 1   |      |
| <chem>CC(C)CO</chem>                                        |      |     |      | 0   | 0    |
| <chem>COc1ccc(cc1)C(OC(=O)C)C=C</chem>                      |      |     |      | 1   |      |
| <chem>COc1ccc(cc1)C(=C(CCC(=O)O)C#N)c2ccc</chem>            |      |     |      | 0   |      |
| <chem>O=N(=O)c1ccc2ccc3c4ccccc4cc5ccc1c2c</chem>            |      |     |      | 1   |      |
| <chem>CC1=CC2=C(C(=O)C(=O)[C@](C)(O)[C@H</chem>             |      |     |      | 1   |      |
| <chem>Oc1ccc(Cl)cc:</chem>                                  | 0    | 0   |      | 0   |      |
| <chem>C[C@H](N)CN1CCc2ccc(Br</chem>                         |      | 1   |      |     |      |
| <chem>CC(=O)OCNC(=O)c1ccc(Cl)cc1</chem>                     |      |     |      | 0   |      |
| <chem>CCC1(C)CO1</chem>                                     |      |     |      | 0   |      |
| <chem>CN(C(=O)c1csc(c1)[N+](=O)[O-])c2ccccc</chem>          |      |     |      | 1   |      |
| <chem>Cc1cc(C)c2ccccc2c1</chem>                             |      |     |      | 0   |      |
| <chem>CCCCOC(=O)c1ccccc1C(=O)OCCCC</chem>                   |      |     |      | 0   | 0    |
| <chem>C=CC1CO1</chem>                                       |      |     |      | 1   | 0    |
| <chem>CCCCCCCC\C=C/CCCCCCCC(=O)OC(CO)CO</chem>              |      |     |      |     | 0    |
| <chem>CC1=CC(=O)C</chem>                                    | 0    | 0   |      |     | 0    |
| <chem>FC(Cl)C(F)(F)F</chem>                                 |      |     |      | 0   |      |
| <chem>OC(C(=O)O)[C</chem>                                   | 0    | 0   |      |     |      |
| <chem>CC(N)C12CC3</chem>                                    | 0    | 0   |      |     | 0    |
| <chem>CCSC(=N)Nc1</chem>                                    | 0    |     |      |     |      |

|                                             |   |   |   |
|---------------------------------------------|---|---|---|
| O=C1c2ccccc2C(Cc3ccncc3                     | 1 |   |   |
| CCN1CCN(C(                                  | 0 | 0 |   |
| Oc1ccc(cc1[N+](=O)[O-])c2ccccc2             |   |   | 0 |
| COC1=CC(=O)c2c(nc(C)c3c4c[nH]ccc4nc         |   |   | 1 |
| CCc1cccc2c3(                                | 0 | 0 |   |
| N#Cc1c2ccccc2cc3ccccc13                     |   |   | 1 |
| NC(=S)NNC(=S)N                              |   |   | 0 |
| CN(C)CCNC(=O)c1cccc2C(=O)c3ccccc3Sc         |   |   | 1 |
| C[C@]12CC[C(                                | 0 | 0 | 0 |
| CCCC#Cc1nc                                  | 0 |   |   |
| CS(=O)(=O)Nc1ccc(Nc2c3ccc(cc3nc4ccc         |   |   | 0 |
| COC(=O)C1=CO[C@@H](C                        |   | 0 |   |
| CCC(=O)OCC(=O)[C@@]1(OC(=O)CC)[C@H](C)C[C@H |   |   | 1 |
| COc1cc\C=C                                  | 0 | 0 |   |
| ClC(=C(Cl)Cl)Cl                             |   |   | 0 |
| Cc1ccc2ccccc2n1                             |   |   | 1 |
| Cc1cc2ccccc2cc1N(=O)=O                      |   |   | 0 |
| c1ccc2[nH]ccc2c1                            | 0 |   | 0 |
| CCCCC\C=C\C=O                               |   |   | 0 |
| [O-]C(=O)C=C                                |   |   | 0 |
| Cc1cnc2c(ccc3c2nc(N)n3C)n1                  |   |   | 1 |
| CCN(CC)CCNc1ccc2ncn3c4ccc(O)cc4C(=C         |   |   | 1 |
| Oc1ccc2c3ccc4ccc5ccccc6cc(c2c1)c3c4c5       |   |   | 1 |
| CCCCC(CC)CC                                 | 0 | 0 |   |
| Cc1oc2cc(NC(=O)Nc3ccnc4                     |   |   | 1 |
| [O-][N+](=O)c1oc\C=C\N2CCNC2=O)cc           |   |   | 1 |
| CCC(=O)N(C1                                 | 1 | 0 | 0 |
| Oc1ccc2C(=O)C=C(Oc2c1O                      |   |   | 0 |
| CC(Cc1ccccc1                                | 0 | 0 |   |
| CNC1C(O)C(C                                 | 0 | 0 |   |
| [N-]=[N+]=C1C=CC(=O)C=C1                    |   |   | 1 |
| BrCBr                                       |   |   | 1 |
| CCCCCCCCC(                                  | 0 | 0 | 0 |
| CC(C)ON(OC(=O)C)C(=O)c1ccccc1               |   |   | 1 |
| O[C@@H]1OC(=O)C(=C1C(Cl)Cl)Cl               |   |   | 1 |
| CCc1cc(OC)c(C[C@H](C)N)cc1OC                |   |   | 0 |
| CC1(C)CC2=C(C=O)C3(CC3(C)C(O)C2(O)C         |   |   | 1 |
| Oc1ccc(cc1)N=Nc2ccccc2                      |   |   | 1 |
| C[C@H]1C[C@]2(O[C@@I                        |   | 0 |   |
| COc1ccc(cc1)C(=O)N2N=CC(=C(Cl)C2=O          |   |   | 0 |
| Cc1oc(C[N+](C)(C)C)cc1                      |   | 0 |   |
| OCc1cc(O)c2C(=O)c3c(O)cccc3C(=O)c2c         |   |   | 1 |
| ClCc1cccc(CCl)c1                            |   |   | 0 |

|                                      |   |   |
|--------------------------------------|---|---|
| O=C1c2ccccc2c3ccc4ccc5ccccc5c4c13    | 0 |   |
| CCCN1C(=O)c2ccccc2C1=O               |   | 0 |
| CC(=O)Nc1nc                          | 0 | 0 |
| Fc1ccc2c(c[n                         | 1 |   |
| Oc1ccc(Cl)c(Cl)c1                    | 0 | 1 |
| O=N(=Nc1ccc2c(Cc3ccccc23)c1)c4ccc5c  | 0 |   |
| CN[C@@H](Cc1c[nH]c2cc                | 0 |   |
| CC(=C)C(=O)OCC1CO1                   | 1 | 0 |
| OC(=O)C=Cc1ccc(O)c(O)c1              |   | 0 |
| Oc1cccc2c3cc4ccccc4cc3c5ccccc5c12    | 1 |   |
| CC(=O)N(O)c1ccc(Cl)cc1               | 0 |   |
| C[C@]12[C@                           | 0 | 0 |
| NS(=O)(=O)c                          | 0 | 0 |
| C=C[C@H]1CO1                         | 1 |   |
| NC(C#N)C(=N)C#N                      | 0 |   |
| Oc1ccc(Cc2ccc(O)cc2)cc1              |   | 1 |
| Oc1cc(O)c2C(=O)C=C(Oc2               | 0 |   |
| Cc1nc(NS(=C                          | 0 | 0 |
| CC(C)OC(=O)CC(O)(CC(=O)O)C(=O)O      | 0 |   |
| CCN1CCC[C@H]1CNC(=O)c                | 0 |   |
| O=N(=O)c1ccc(COc2ccccc2)cc1          | 0 |   |
| OCc1oc(cc1)c                         | 0 | 0 |
| Brc1ccc2ncnc(NCC=C)c2c1              | 0 |   |
| OC[P+](CO)(CO)CO                     | 0 |   |
| CN(C)c1ccc(NC(=O)Nc2cc(              | 0 |   |
| NNc1nncc2cnccc12                     | 1 |   |
| CN(N=O)C(=N)N[N+](=O)[O-]            | 1 |   |
| CC(=CC(=O)C)C                        |   | 0 |
| CCCC(=O)OC(                          | 0 | 0 |
| CCCCCCCCCCCC(=O)OOC(=O)CCCCCCCCC     | 0 |   |
| CCCCOc1cc(C                          | 1 | 1 |
| CCCCCCCCCCCC(=O)NCCO                 | 0 |   |
| CN1CCC(=C2c3ccccc3CC(=O)c4sccc24)CC1 |   | 0 |
| CN1C(CCl)Nc2cc(Cl)c(cc2[             | 0 |   |
| Nc1cccc2nc3ccccc3cc12                | 1 |   |
| COc1ccc2C3C                          | 0 | 0 |
| Cc1ncc([N+](                         | 0 | 0 |
| CC1CCC2C(C)C(=O)OC3OC                | 0 |   |
| O=C(ON=C1C=CC(=NOC(=O)c2ccccc2)C=    | 1 |   |
| COc1cc(c2ncccc2c1)[N+](=O)[O-]       | 1 |   |
| [O-]C(=O)C(Cl)(Cl)Cl                 |   | 0 |
| CIP(=O)(N1CCOC1=O)N2CCOC2=O          | 1 |   |
| ClCCl                                | 1 | 0 |

|                                                 |   |   |   |   |   |
|-------------------------------------------------|---|---|---|---|---|
| CNC(=O)N(O)C(=O)C                               | 1 |   |   |   |   |
| CC(C)Cc1nccs1                                   | 1 |   | 0 |   |   |
| CN(C)c1ccc(cc1)N=Nc2ccc3ccccc3c2                | 1 |   |   |   |   |
| NCCCCOCCOCCOCCCN                                |   |   |   | 0 |   |
| CCCCC(=O)Nc1snc2ccc(Cl)cc12                     | 0 |   |   |   |   |
| CCOc1cccc1OCCN[C@H](                            | 0 |   |   |   |   |
| C[C@]12C=CC3=C4CCC(=O)C=C4CC[C@H]3[C@@H]1C      |   |   |   | 0 |   |
| OC(=O)C1CN                                      | 0 | 0 |   |   |   |
| COc1cc2CCN(C)[C@H]3Cc                           | 1 |   |   |   |   |
| CC1(C)[C@H](CC[C@@]2(C)[C@H]1CC[C@]3(C)[C@C     |   |   |   | 0 |   |
| [O-]C(=O)Cc1cccc2ccccc12                        |   |   |   | 0 |   |
| OCC(O)c1cccc1                                   |   |   |   | 0 |   |
| CC1(C)CC2C=C(C=O)C34CC3(C2C1)C(=O)              | 1 |   |   |   |   |
| Cn1c(N=N#N)nc2ccc3ncccc3c12                     | 1 |   |   |   |   |
| COc1ccc(CCO)cc1                                 |   |   |   | 0 |   |
| [O-][N+](=O)c1ccc2c(CCc3cc(ccc23))[N+           | 1 |   |   |   |   |
| Cc1cc(N=Nc2cccnc2)c(N)cc1N                      | 1 |   |   |   |   |
| CC1=CC(=O)NO1                                   |   |   |   | 0 |   |
| O[C@H]([C@H](O)[C@@H](O)C(=O)O)[C@H](O)C(=O     |   |   |   | 0 |   |
| Cc1cccc(c1)C                                    | 0 | 0 |   |   |   |
| Nc1ccc(Oc2ccc(Cl)cc2)cc1                        |   |   |   | 0 |   |
| Cc1cccc(N)c1C                                   | 1 |   |   |   |   |
| C1OC1c2ccc3ccccc3c2                             | 1 |   |   |   |   |
| CN1C(CC2=C                                      | 0 | 0 |   |   |   |
| CCC(=O)c1cccc1                                  |   |   |   | 0 |   |
| CC(=O)Nc1cc                                     | 0 | 0 | 0 | 0 | 1 |
| Clc1ccc(c(Cl)c1Cl)c2ccc(Cl)c(Cl)c2Cl            |   |   |   | 1 |   |
| CC1CC(=O)O1                                     | 1 |   |   | 0 |   |
| CC1C(=O)OC2CC34C5CC(C                           | 0 |   |   |   |   |
| COC(=O)c1cc(Cl)cc(Cl)c1                         |   |   |   | 0 |   |
| CC(=O)NNC(=                                     | 0 | 0 |   |   |   |
| COc1ccc(CCN(CCc2ccc(OC                          | 0 |   |   |   |   |
| COC(=O)Nc1                                      | 0 | 1 | 1 |   |   |
| COc1cc(NC(=O)CC(=O)C)c(OC)cc1Cl                 |   |   |   | 0 |   |
| [O-][N+](=O)c1cccc1\C=C\C=C=O                   | 1 |   |   |   |   |
| O=N(=O)c1ccc2[nH]c3ccccc3c2c1                   | 1 |   |   |   |   |
| Cc1c2ccccc2c(COS(=O)(=O)O)c3ccc4ccc             | 1 |   |   |   |   |
| Cc1c(O)cc(cc1N(=O)=O)N(=O)=O                    | 0 |   |   |   |   |
| CC(C)[C@@H](Nc1ccc(cc1Cl)C(F)(F)F)C(=O)OC(C#N)c |   |   |   | 1 |   |
| CCOC(=O)C1=C(C)NC(=C(C1c2cccc(c2)N(=O)=O)C(=O)  |   |   |   | 1 |   |
| C1Cc2ccc3ccc4ccccc4c3c2C1                       | 1 |   |   |   |   |
| Clc1ccc(C(Cn2ccnc2)OCc3c(Cl)cccc3Cl)c(Cl)c1     |   |   |   | 0 |   |
| CO\N=C/C(=O)N[C@H]1[C@H]2SCC(=C(N2C1=O)C(=      |   |   |   | 0 |   |

|                                           |   |   |   |   |   |
|-------------------------------------------|---|---|---|---|---|
| CCOP(=S)(OCC)OCCSCC                       |   |   | 1 |   |   |
| OC\C=C\1/O                                | 0 | 0 |   |   |   |
| Cc1ncc(CO)c(CO)c1O                        |   |   | 0 | 0 | 0 |
| CC(O)(P(=O)(O)[O-])P(=O)(O)[O-]           |   |   |   | 0 |   |
| COC1=CC(=O)C=CC1=O                        |   |   | 0 |   |   |
| O1c2cccc2Sc3cccc13                        |   |   | 0 |   |   |
| CCCC[C@@H](CC)COP(OC[C@H](CC)CC           |   |   | 0 |   |   |
| CCCCCCCCC                                 | 0 | 0 |   | 0 |   |
| Oc1cc(cc2cc(                              | 0 | 0 |   |   |   |
| OCC1NCC(O)C(O)C1O                         |   |   | 0 |   |   |
| CN(C)N(=O)=O                              |   |   | 1 |   |   |
| Fc1ccc(cc1)C(=O)CCCN2CC                   |   |   | 0 |   |   |
| CCOC(=O)C1:                               | 0 | 0 |   |   |   |
| [O-]Cl=O                                  |   |   |   | 0 |   |
| NC(=O)C1(O[C@H]1C(=O)c2cccc2)C(=C         |   |   | 1 |   |   |
| CNC(C)[C@@                                | 0 | 0 |   |   |   |
| ON(C=O)c1cccc1                            |   |   | 0 |   |   |
| Cc1ccc2c(ccc3c4cccc4ccc23)c1              |   |   | 1 |   |   |
| Cc1[nH]cnc1CSCCN=C(NCC#C)NC#N             |   |   | 0 |   |   |
| CC1(C)CCC(C)                              | 0 | 0 |   | 1 |   |
| ClCC(Cl)CBr                               |   |   | 1 |   |   |
| CN(CCOc1ccc                               | 1 | 0 |   |   |   |
| OC(=O)Cc1cccc(c1)[N+](=O)[O-]             |   |   | 0 |   |   |
| CC[N+](CC)(CC)CCC(O)(C1CCCC1)c2cccc2      |   |   |   | 0 |   |
| C[C@@H](O)CNC[C@@H](C)O                   |   |   | 0 |   |   |
| N[C@H]1C(O)O[C@H](CO)[C@H](O)[C@@H]1O     |   |   |   | 0 |   |
| CCN1C=C(C(=                               | 0 | 0 |   |   |   |
| [O-][N+](=O)                              | 1 |   |   |   |   |
| OC1CCCCCCCCCCC1                           |   |   |   | 1 |   |
| CN(C)CCOC(=                               | 0 | 0 |   | 0 |   |
| C[C@@]12C                                 | 0 | 0 |   |   |   |
| O=C\C=C\C1ccc2OCOC2c1                     |   |   | 0 |   |   |
| CC1OC(=O)C(=C1C)O                         |   |   |   | 0 |   |
| O=C=Nc1ccc(Cc2ccc(cc2)N=C=O)cc1           |   |   | 0 | 0 |   |
| CCCCCCCC\C=C\CCCCCCCC(=O)O                |   |   | 0 |   |   |
| COC(=O)C(=Cc1oc(cc1)N(=O)=O)C             |   |   | 1 |   |   |
| CC1c2cccc2c3ccc(C)cc13                    |   |   | 1 |   |   |
| CCC(=O)OC\C=C\C1cccc1                     |   |   |   | 0 |   |
| NCCS(=O)(=C                               | 0 |   | 0 |   |   |
| CNC(=O)[C@                                | 0 | 0 |   | 0 |   |
| OCc1cc(O)c2C(=O)c3c(O)cc(O)cc3C(=O)       |   |   | 1 |   |   |
| NC1=NC(=O)N(C=N1)[C@H]2C[C@H](O)[C@@H](CO |   |   |   | 0 |   |
| C[C@@H]1Cc2cccc2N1N                       |   | 0 |   |   |   |

|                                                |   |   |   |   |
|------------------------------------------------|---|---|---|---|
| COc1cc2N3C                                     | 0 | 0 |   |   |
| NC(=O)CCCC                                     | 0 | 0 |   | 0 |
| C\C=C(\C)/C#N                                  |   |   | 0 | 0 |
| COc1ccc2nc([nH]c2c1)S(=O)Cc3ncc(C)c(OC)c3C     |   |   |   | 0 |
| C1CS1                                          |   |   | 1 | 0 |
| OCC1O[C@@                                      | 0 | 0 |   |   |
| CSCC(N)C(=O)O                                  |   |   | 0 |   |
| O=C1CCCN1C                                     | 0 | 0 |   |   |
| CCN(CC)CCc1                                    | 0 | 0 |   | 0 |
| O\N=C/1\C(=                                    | 1 | 0 |   |   |
| CN1C(=O)N(                                     | 0 | 0 |   | 0 |
| OC1C(O)c2cc3cccc3c4ccc5cccc1c5c24              |   |   | 1 |   |
| Nc1cccc1SCSc2cccc2N                            |   |   | 1 |   |
| Cc1c(N)cccc1N                                  |   |   | 1 | 1 |
| Brc1ccc(CN2C3C2c4cccc4c5cccc35)cc1             |   |   | 1 |   |
| O=C1CCCCC1                                     | 0 | 0 |   | 0 |
| CCC(=O)C=Cc1ccc(OC)cc1                         |   |   |   | 0 |
| Cc1cc(N)c(cc1Cl)S(=O)(=O)O                     |   |   | 0 | 0 |
| N=C1CC(=O)C(=O)c2cccc12                        |   |   | 1 |   |
| CCC(C)(O)CCC=C(C)C                             |   |   |   | 0 |
| NC(CCCNC=CC=O)C(=O)O                           |   |   | 1 |   |
| [O-][N+](=O)c1cc(Cl)ccc1Cl                     |   |   | 1 |   |
| CCOC(=O)[C@H](CCc1cccc1)N[C@@H]                |   |   | 0 | 0 |
| C1Cc2cccnc2C3OC13                              |   |   | 0 |   |
| Nc1cccc2c(Cl)nsc12                             |   |   | 1 |   |
| CNC(=O)c1cccc(NCC(=O)NCCc2ccc(OC)c             |   |   | 0 |   |
| CCCCCN(N=O)C(=N)N[N+](=O)[O-]                  |   |   | 1 |   |
| C[n+]1c(cc(c2cccc2)n1C)c3cccc3                 |   |   |   | 0 |
| CC1(C)OC[C@H]2O[C@]3(OC(C)(C)O[C@H]3[C@@       |   |   |   | 0 |
| CC1(C)SC2C(I                                   | 0 | 0 |   |   |
| CN(C)N=Nc1cccc1                                |   |   | 1 | 0 |
| Cc1cccc(C)c1                                   | 1 | 1 |   |   |
| Oc1ccc(cc1)[N+](=O)[O-]                        |   |   | 0 |   |
| CCN(CC)c1ccc(cc1)C(=C2C=CC(=[N+](CC)           |   |   | 1 |   |
| Cc1cc(C)c(C)cc1C                               |   |   | 0 | 0 |
| CC(C)(C)N1N=CC(=C(Cl)C1=O)SCc2ccc(cc2)C(C)(C)C |   |   |   | 1 |
| OCCCCCO                                        |   |   |   | 0 |
| C[C@H]1C[S+](=O)([O-])C                        |   | 0 |   |   |
| CC(=C)C#N                                      |   |   | 0 | 0 |
| CCOc1nc(ns1)C(Cl)(Cl)Cl                        |   |   |   | 0 |
| Cn1cnc2c(NC                                    | 0 | 0 |   |   |
| Cc1ccc2cc(C)ccc2c1                             |   |   |   | 0 |
| OCC12COC(N1C(OC2)c3ccc(cc3)[N+](=C             |   |   | 1 |   |

|                                                   |   |   |   |
|---------------------------------------------------|---|---|---|
| CCCCCCCCCCCC1=C(O)C(=C                            | 0 |   |   |
| Cc1cc2c3cccc3ccc2c4cccc14                         |   | 1 |   |
| SC(NC(=O)NC(S)c1nc2cccc2s1)c3nc4cc                |   | 1 |   |
| C1CN1c2nc(nc(n2)N3CC3)N4CC4                       |   | 1 |   |
| O=C1CCCc2c1ccc3c2ccc4cccc34                       |   | 1 |   |
| CNc1ccc(cc1)N=Nc2ccc(cc2)N(C)C(=O)C               |   | 1 |   |
| Cc1c(Cl)cccc1                                     | 0 | 0 | 1 |
| OC1C=CC2=C(C1O)c3cccc4cccc2c34                    |   | 1 |   |
| CNC[C@H](O)c1ccc(O)cc1                            | 0 |   |   |
| O=C1NC2(CCCC2)C(=O)N1CCN3CC3                      |   | 1 |   |
| Oc1c(Cl)cc(Cl)c(Cl)c1Cl                           |   | 0 | 1 |
| OC(=O)C(CC1                                       | 0 | 0 | 0 |
| CC(C)NC(=O)N[S+](=O)([O                           | 0 |   |   |
| Cn1nc(c2cccc2)c1N(=O)=O                           |   | 1 |   |
| CCCc1nn(C)c2c(O)nc(nc12)                          | 0 |   |   |
| O=C1OCCN1N=Cc2oc(cc2)N(=O)=O                      |   | 1 |   |
| FC(F)(F)[C@H](Cl)Br                               |   | 0 |   |
| CCN(C(=O)\C                                       | 0 | 0 |   |
| CCOC(=O)CCC(=O)OCC                                |   |   | 0 |
| CCOC(=O)C(C)OC(=O)c1cc(Oc2ccc(cc2Cl)C(F)(F)F)ccc: |   |   | 1 |
| OC1C=Cc2ccc3c(ccc4cccc34)c2C1O                    |   | 1 |   |
| CN(C)C(=O)c1nc(CNC(=O)CN)n(n1)c2ccc               |   | 0 |   |
| CC(=CCC1CCCC1=O)C                                 |   | 0 |   |
| CO[C@@H]1[C@@H](CC[C@]2(CO2)[C@H]1[C@@]:          |   |   | 0 |
| [O-][N+](=O)c1ccc(cc1)c2csc(NC=O)n2               |   | 1 |   |
| COc1ccc(C=CC(=O)OCCC(C)C)cc1                      |   |   | 0 |
| CCOC(OCC)\C=C\C)/CCC=C(C)C                        |   | 0 |   |
| CC(=O)OC1CCC2C3CCc4cc(                            | 0 |   |   |
| OC(=O)[C@H](OC(=O)c1cccc1)[C@@H](OC(=O)c2cc       |   |   | 0 |
| CCN(CCCl)c1ccc(cc1)c2nc3cc(ccc3[nH]2)             |   | 0 |   |
| CCC(=O)OC(C)(C)C1CCC(=CC1)C                       |   |   | 0 |
| CN1C(=O)N(Cc2occc2)c3[nH]c(C)nc3C1=O              |   |   | 0 |
| CC(Cc1cccc1                                       | 0 | 0 | 0 |
| Oc1nsc2cc(ccc12)N(=O)=O                           |   | 1 |   |
| C=CCN1C(=O)N(CC=C)C(=O)N(CC=C)C1=                 | 0 |   | 0 |
| Cc1ccc2N=C3N(CCC3(O)C):                           | 0 |   |   |
| Oc1c(Cl)ccc(Cl)c1Cl                               |   | 0 | 1 |
| Cc1c2ccncc2c                                      | 1 |   | 1 |
| CC1(C)CC(CC(C)(CN=C=O)C1)N=C=O                    | 0 |   | 0 |
| O=Cc1ccc(cc1)C(=O)ON(OCc2cccc2)C(=                |   | 1 |   |
| CN([C@@H]1CCCC[C@@H                               | 1 |   |   |
| Cc1cc(C)c(N)c(C)c1                                |   | 1 |   |
| C1Cc2ccc3ncccc3c2C4OC14                           |   | 1 |   |

|                                                 |   |   |
|-------------------------------------------------|---|---|
| Clc1ccc2NC(=O)CN=C(c3ccccc3)c2c1                | 0 | 0 |
| Fc1ccccc1C2=CC(=O)c3cc4                         | 1 |   |
| CC(COCCO)OCCO                                   |   | 0 |
| CCCCCCCCC(                                      | 0 | 0 |
| [O-][N+](=O)c1oc2c(c1)cc3ccc4cccc5ccc           | 1 |   |
| CCOC(=O)CC(SP(=O)(OC)OC)C(=O)OCC                | 0 | 0 |
| CN[C@H](C)(                                     | 1 |   |
| OC[C@H]1O[C@H]([C@H]                            | 0 |   |
| CCN(CC)CCC(=O)N1c2cccc(                         | 0 |   |
| Cc1cc(cc(c1C)N(=O)=O)N(=O)=O                    | 0 |   |
| lc1ccc(cc1)n2nc(n[n+])2c3ccc(cc3)N(=O)          | 0 |   |
| CC(=O)\C(=N                                     | 0 | 0 |
| Oc1ccc2CC3N(CC=C)CC[C@                          | 1 |   |
| C[C@H]1C[C@@H]2[C@H](CC[C@@]3(C)[C@H]2CC[       |   | 0 |
| [N-]=[N+]=NCCC1ccccc1                           | 1 |   |
| CC1=C2C(O)C(C)(C)C=C2C(=O)C(C)(O)C1             | 1 |   |
| O=N(=O)c1ccc2c(CCC3c4CCCCc4ccc23)c:             | 1 |   |
| BrCc1c2ccccc2cc3c1ccc4ccccc34                   | 1 |   |
| O=N(=Nc1ccccc1)c2ccccc2                         | 1 |   |
| CC=CC=CCOC(=O)C(C)C                             |   | 0 |
| COc1cc(CC(=                                     | 0 | 0 |
| CCC(CCC(C)C:                                    | 0 | 0 |
| Fc1ccc(Oc2ccnc3cc(Cl)cc(Cl)c23)cc1              |   | 1 |
| CCCN(CCCC)N=O                                   | 1 | 0 |
| CCCCC(CC)COC(=O)C=C                             | 0 | 0 |
| [O-][N+](=O)c1c2CCc3cccc4ccc(c5ccccc:           | 1 |   |
| O[C@H]1[C@H](O)c2nc3ccc4ccccc4c3c(              | 0 |   |
| Nc1ccc2cc(cc(O)c2c1N=Nc3ccc(cc3)c4cc            | 1 |   |
| COc1cc(\C=C                                     | 0 | 0 |
| NCC(O)(CS(=                                     | 0 |   |
| [O-]C(=O)C1=C(N=Nc2ccc(cc2)S(=O)(=O)[O-])C(=O)N |   | 0 |
| O1C=CC2OC2C=C1                                  | 0 |   |
| CC(=O)C1(C)OC12C=Cc3ccccc3C2=O                  | 0 |   |
| CCCCCCCC\C=C/CCCCCCCC(                          | 0 |   |
| Cc1nnc(N[S+](=O)([O-])c2                        | 0 |   |
| CC(C)S                                          | 0 | 0 |
| CCCCOc1ccc(\C=N\c2ccc(CC)cc2)cc1                | 1 |   |
| CCN[C@H]1CN(CCCOC)S(=O)(=O)c2sc(cc12)S(=O)(=O   |   | 0 |
| CCCCC[C@@                                       | 0 | 0 |
| CC(=CCC\C(=C\COC(=O)C)\C)C                      |   | 0 |
| CCOP(=S)(OCC)SCN1C(=O)Oc2cc(Cl)ccc1             | 0 |   |
| COC(=O)CC(C(=O)C)C(=O)OC                        |   | 0 |
| C[C@H]1C2C                                      | 0 | 0 |



|                                              |   |   |   |   |   |
|----------------------------------------------|---|---|---|---|---|
| COC(=O)C=C                                   |   |   | 0 |   |   |
| Cc1ccc(cc1)N(C)C                             | 0 | 0 |   |   |   |
| CN(N=O)C(=O)C                                |   |   | 1 |   |   |
| CCCCCCCCCCCCN(C)C                            |   |   |   | 0 |   |
| Cc1cc2ccc3cc4cccc4c5ccc(c1)c2c35             |   |   | 1 |   |   |
| CN1CCC[C@H]1c2onc(C)c2                       |   | 0 |   |   |   |
| CN1N(C(=O)C(=C1C)NC(=C                       |   | 0 |   | 0 |   |
| CC(C)(C)NC[C@@H](O)CO                        |   | 1 |   |   |   |
| Oc1cc(O)c2cccc2c1                            |   |   | 1 |   |   |
| COc1ccc(cc1)[S+](=O)([O-]                    |   | 0 |   |   |   |
| [O-][N+](=O)c1ccc2[C@H]3O[C@H]3c4            |   |   | 1 |   |   |
| O=N(=O)c1ccc2C3OC3c4cccc5c6cccc6c            |   |   | 1 |   |   |
| CC(C)c1ccc2c(c1)c(SC(C)(C                    |   | 0 |   |   |   |
| [N-]=[N+]=Nc1ccc(Nc2c3cccc3nc4cccc           |   |   | 1 |   |   |
| COc1ccc(CN2                                  | 1 | 1 |   |   |   |
| C[N+](C)CCCC(C1)OC(=O)C(O)(c2cccc2)c3cccc3   |   |   |   | 0 | 0 |
| CCOc1ccc(cc1)NC(=O)C(=O)Nc2cccc2CC           |   |   | 0 |   |   |
| CC(C)(C)NC(C                                 | 0 | 0 |   |   |   |
| CC(C)c1nnc(C)n1C2C[C@H]3CC[C@H](C2)N3CC[C@   |   |   |   | 0 |   |
| CCN(CC)CCO                                   |   |   | 0 | 0 |   |
| CCCCCCCCCCCCCCCCOP(=O)([O-])OC1CC[N+](C)(C)C |   |   |   | 0 |   |
| Clc1ccc(\C=N/NC(=N)N\N=C\c2ccc(Cl)cc2)cc1    |   |   |   | 0 |   |
| O=C1Oc2ccc                                   | 0 | 0 | 1 | 0 |   |
| Oc1cccc1c2cccc2                              |   |   | 0 | 1 |   |
| CC1CCC(=O)C1=O                               |   |   | 0 | 0 |   |
| CC(C)(C)CC(C)(S)CC(C)(C)C                    |   |   | 0 |   |   |
| Cc1c(cccc1N(=O)=O)N=N(=O)c2cccc(c2)          |   |   | 0 |   |   |
| NNCc1cccc(C                                  | 0 |   |   |   |   |
| CC(C)NCC(O)COc1cccc2ccc                      |   | 1 | 0 |   |   |
| OCCN(CCO)c1ccc(cc1O)[N+](=O)[O-]             |   |   | 1 |   |   |
| CC(Br)C(=O)NCc1cccc1                         |   |   | 1 |   |   |
| CNC(=O)OCc                                   | 0 | 0 |   | 0 |   |
| CN(C)CC\C=C\1/c2cccc2C                       |   | 1 | 0 |   |   |
| CC(C)(CO)C(O)C(=O)NCCC(=O)O                  |   |   | 0 |   |   |
| CC(=C)C(=O)OCCOC(=O)NNC(=O)OCCOC             |   |   | 0 |   |   |
| OCC(CO)(CO)CO                                |   |   | 0 | 0 |   |
| CCC(Cl)N(=O)=O                               |   |   |   | 0 |   |
| Cc1c2C3NC3c4cccc4c2c(C)c5cccc15              |   |   | 1 |   |   |
| CNc1cc(NS(=                                  | 0 |   |   |   |   |
| N[C@H](Cc1ccc(O)cc1)C(=                      |   | 0 |   |   |   |
| CC[C@@H](C                                   | 0 | 0 |   | 0 |   |
| CC(=O)ON(OCc1ccc(cc1)C(C)(C)C(=O)C           |   |   | 1 |   |   |
| CCC(=O)OCCC(C)CCC=C(C)C                      |   |   |   | 0 |   |

|                                                       |   |   |   |   |
|-------------------------------------------------------|---|---|---|---|
| Cc1cccc2cc3ccccc3cc12                                 |   |   | 0 |   |
| COc1ccc(cc1)                                          | 0 | 0 |   | 0 |
| CCCC(=O)Nc1ccc(OC[C@H](O)CNC(C)C)c1                   |   |   | 0 |   |
| O=NN1CCNC1=O                                          |   |   | 1 |   |
| ClCC#CCOC(=O)Nc1cccc(Cl)c1                            |   |   |   | 1 |
| CC(=CCC1=C(O)C(=O)c2ccccc2C1=O)C                      |   |   | 0 | 1 |
| [O-]C(=O)C1=C(C[n+]2ccccc2)CS[C@@H]3[C@H](NC(=O)C1)C3 |   |   |   | 0 |
| Nc1cc(Cl)c(N)c(Cl)c1                                  |   |   | 1 | 0 |
| CC(Cl)(Cl)[N+](=O)[O-]                                |   |   | 1 |   |
| CSC1=N[C@](C)(C(=O)N1Nc2ccccc2)c3ccccc3               |   |   |   | 1 |
| CN(C)CCCN=C1c2ccccc2Nc3c(Cl)ccc(c13)C                 |   |   | 1 |   |
| O=C(NCCON(=O)=O)c1cccn1                               |   |   |   | 0 |
| COc1cc2CCN(C=O)c3cc4ccccc4c(c1OC)c1                   |   |   | 1 |   |
| COC(C)C(O)(C(C)C)C(=O)O                               |   |   | 0 |   |
| O=S(=O)(Cc1ccccc1)N2C3C2c4ccccc4c5c1ccccc5            |   |   | 1 |   |
| NC(=O)c1cccc(c1)N(=O)=O                               |   |   |   | 0 |
| Nc1nc(nc2c1ncn2C3OC(CO)C(O)C3O)c4ccccc4               |   |   | 1 |   |
| CC(C)C1=CC2=CCC3C(C)(CCC3(C)C(=O)C)C2                 |   |   | 0 |   |
| CC(C)C1CCC(C)C1                                       | 0 | 0 |   | 0 |
| CCCCCCCCCCCCCCCCC1c1                                  |   |   | 0 |   |
| [O-][N+](=O)c1ccc(c2ccc(c(c2)[N+](=O)O)cc1)C(=O)O     |   |   | 1 |   |
| OCc1c(cccc1N(=O)=O)N(=O)=O                            |   |   | 0 |   |
| CCCCCCCCC=O                                           |   |   |   | 0 |
| CCCC(C)C(OC(=O)CC(CC(=O)O)C(=O)O)C                    |   |   | 0 |   |
| Clc1ccccc1C=C(C#N)C#N                                 |   |   | 1 |   |
| CCNc1snc2ccccc12                                      |   |   | 0 |   |
| CCCCCCBr                                              |   |   |   | 0 |
| CCCCC\C=C/C                                           | 0 | 0 |   | 0 |
| O=C1CCCc2c1cc3ccc4cccc5ccc2c3c45                      |   |   |   | 1 |
| CCCN[C@@H]1CCc2c(OC)c1                                |   |   | 0 |   |
| CCCC(=O)OCc1ccccc1[N+](=O)[O-]                        |   |   | 0 |   |
| Cc1ccc(O)c(C)c1                                       |   |   | 1 | 0 |
| ClC(=C1C(=O)NC(=O)C1(Cl)Cl)Cl                         |   |   | 1 |   |
| Nc1cc(cnc1O)c2ccncc2                                  |   |   | 0 |   |
| Nc1nc(O)c(B)cc1                                       | 0 | 0 |   |   |
| CC(=C)c1cccc(c1)C(=C)C                                |   |   |   | 0 |
| FC(F)(F)C(Cl)C                                        | 0 | 0 | 0 | 0 |
| C[N@+]12CCCC[C@@H]1CCC(=C(c3cccs3)c4cccs4)C2          |   |   |   | 0 |
| COc1c(O)c2N(CCC2c3cc([nH]c13)C(=O)N)C2                |   |   | 0 |   |
| C(=C\C1CCCC1)/c2ccccc2                                |   |   | 0 |   |
| OC(=O)c1c(O)cc2C(=O)c3ccccc3C(=O)c2                   |   |   | 0 |   |
| CC(C(=O)O)c1                                          | 0 | 0 | 0 | 0 |
| CCN(N=O)C#N                                           |   |   | 1 |   |

|                                                                           |   |   |
|---------------------------------------------------------------------------|---|---|
| Cc1cc(N)cc(c1N)N(=O)=O                                                    | 1 |   |
| CCCCCCCCS(=O)C(C)Cc1ccc2OCOc2c1                                           | 0 | 0 |
| CCCCN(C)N=O                                                               | 1 |   |
| C1CCC2OCCOCCOC3CCCC3OCCOCCOCC                                             | 0 |   |
| Cc1ccc(c(C)c1)N(=O)=O                                                     |   | 0 |
| Nc1ccc2nc3ccc(N)cc3nc2c1                                                  | 1 |   |
| CC#N                                                                      | 0 | 0 |
| Cn1cc2cccc(c2n1)[N+](=O)[O-]                                              | 1 |   |
| CCOc1cccc(c1)n2cc(nc2c3ccc(C)cc3)C(=O)N4CCN(CC4                           |   | 1 |
| NC1(CCC1)c2ccc(cc2)c3nc4C=CN5C(=O)NN=C5c4cc3c1                            |   | 1 |
| OCCNCCO                                                                   | 0 | 0 |
| CN(C)C(=O)Nc1ccc(C)c(NC(=O)N(C)C)c1                                       |   | 0 |
| CC1(C)CCCC(C)(C)N1O                                                       | 0 |   |
| Nc1c2cccc2nc3ccc(cc13)[N+](=O)[O-]                                        | 1 |   |
| Nc1nc(N)c2nc(c(N)nc2n1)c3cccc3                                            | 0 | 0 |
| FC(F)(F)c1cc2C(=O)CCc2c3ccc4cccc4c1                                       | 1 |   |
| Cc1cc2CCCS(=O)C(=O)Nc1ccc2                                                | 0 | 0 |
| NCCc1c[nH]c1                                                              | 0 | 0 |
| CCC(OCCOC)OC(=O)C                                                         |   | 0 |
| CNC(=O)Oc1cccc2CC(C)(C)Oc12                                               | 0 | 0 |
| CC(C)(C)OCC1CO1                                                           | 1 | 0 |
| NC(CCS\C=C\Cl)\Cl)C(=O)O                                                  | 1 |   |
| CCOC(=O)C(=C)C                                                            | 0 |   |
| Cc1cc(O)c2C(=O)c3c(O)cc(O)c(c3C(=O)c                                      | 0 |   |
| Fc1ccc(cc1)C(=O)C2CCN(C)C2                                                | 1 |   |
| COc1cc(O[C@@H]2O[C@H](CO)[C@@H](O)C2)O                                    | 1 |   |
| CCCCCCCC1CCC(=O)O1                                                        | 0 | 0 |
| C1OC1c2ccc3ccc4cccc5ccc2c3c45                                             | 1 |   |
| FC(F)(F)c1ccc(Cl)cc1                                                      | 0 | 0 |
| OC\C=C\C=C(=O)Nc1ccc2OC(=O)Nc1ccc2                                        | 0 | 0 |
| N[C@@H](C(=O)N[C@H]1[C@H]2SCC(=C(N2C1=O)C(                                |   | 0 |
| CN(C)CCCNc1c2cccc2nc3cccc13                                               | 1 |   |
| Oc1ccc(cc1)c1                                                             | 1 | 1 |
| COc1cc(N)ccc1NC(=O)C                                                      | 1 |   |
| [O-][n+]1c2cccc2c3ccc4cccc5ccc1c3c45                                      | 1 |   |
| Oc1c(cccc1[N+](=O)[O-])[N+](=O)[O-]                                       | 0 |   |
| ON=CC=NO                                                                  |   | 0 |
| OC(=O)COc1c                                                               | 0 | 0 |
| N[C@@H](CCC(=O)N[C@@H](CS\C=C(C)C)C)C(=O)OC1CC2(COC(=O)C)C(OC3C(C)C)C2=O1 | 1 |   |
| CC(C)CC(=O)OC1CC2(COC(=O)C)C(OC3C(C)C)C2=O1                               | 1 |   |
| C[C@H]1O[C@H](C[C@H](O)[C@@H]1O[C@H]2C[C@@H](O)C)C2=O1                    |   | 1 |
| CCCCCCCCCCC(=O)N(C)CC(=O)O                                                |   | 0 |
| OC1C2OC2c3c(ccc4c5C=Cc6cccc(cc34)c5                                       | 1 |   |



|                                                        |   |   |
|--------------------------------------------------------|---|---|
| COc1cc(c(O)c(c1)C(C)(C)C)c2cc(OC)cc(c:                 | 0 |   |
| Nc1ccc2cc(c(N=Nc3ccc(cc3)c4ccc(cc4)N                   | 1 |   |
| BrC1ccc(cc1)C2OC2C(=O)c3ccccc3                         | 0 |   |
| CC(=O)c1cnccn1                                         |   | 0 |
| CC(=Nc1ccc(C=Nn2nnc3ccnc3c2O)cc1)O                     | 1 |   |
| CC1(C)[C@H](C=C(Cl)Cl)[C@H]1C(=O)OCc2c(F)c(F)cc(       |   | 1 |
| O=N(=O)c1ccc2ncccc2c1                                  | 1 | 1 |
| NC1CONC1=(                                             | 0 | 0 |
| N[C@@H](Cc1cc(CP(=O))(C                                |   | 0 |
| Oc1ccc(C2=CC(=O)c3ccccc:                               |   | 0 |
| Nc1nc(N)c2nc(CNc3ccc(cc3)C(=O)N[C@@H](CCC(=O)          |   | 0 |
| CCCCCO                                                 |   | 0 |
| COc1ccc2cc3c4cc(OC)c(OC)cc4CC[n+] <sup>3</sup> cc2c1OC |   | 1 |
| CN1CCc2cc(N                                            | 0 | 0 |
| Nc1ncnc2c1r                                            | 0 |   |
| O=N(=O)c1ccc(cc1)c2ccccc2                              | 1 |   |
| CN\C(=N/N(=O)=O)\NCc1cnc(Cl)s1                         |   | 0 |
| Oc1ccc(cc1)S(=O)(=O)c2ccc(O)cc2                        | 0 |   |
| CN(C(=S)Oc1ccc2CCCc2c1)c3ccccc(C)c3                    |   | 0 |
| C[C@H](O)C(=O)C1=NC2=                                  |   | 0 |
| [O-][N+](=O)c1oc(\C=C\C=O)cc1                          |   | 1 |
| Cc1occc1C(=O)Nc2ccc(cc2)C(=O)N3CCC(F)(F)\C(=C/C        |   | 0 |
| NC(CSSCC(N)                                            | 0 | 0 |
| COC(=O)C1CC(=O)C(CC1=O)C(=O)OC                         |   | 0 |
| CC1CCC2C(OC(=O)C2=C)C3(C)C(=O)CC=C                     | 0 |   |
| COC1OC2COC(OC2C(O)C1(                                  |   | 0 |
| CC(=O)CCOCCCC(=O)C                                     | 0 |   |
| O[C@@H]1C[C@@](O)(C[C@H](O)[C@                         | 0 |   |
| Oc1cccc(Nc2ccccc2)c1                                   | 0 | 1 |
| O[C@@H]1COC(O)[C@H](O)[C@H]1O                          |   | 0 |
| Nc1ncnc2[nH                                            | 0 | 0 |
| CCOC(=O)c1ccc(OCCN2C[C@H](O)[C@@H](O)[C@H]             |   | 0 |
| Cc1ccc(Cc2ccccc2)cc1                                   | 0 |   |
| O1C2C=Cc3cc4ccc5ccccc6ccc(c3C12)c4c5                   | 1 |   |
| C[C@@H](Nc1[nH]cnc2nc(cc12)c3ccc(C                     | 1 |   |
| CN1C=CN(COCCC(C)(C)[N+](=O)[O-])C1'                    | 0 |   |
| FC(=C)F                                                | 1 |   |
| ClCC1OC(CCl)OC(CCl)O1                                  | 1 |   |
| [O-][N+](=O)c1oc(\C=N\n2cccn2)cc1                      | 1 |   |
| Cc1onc(c1C(=                                           | 0 | 0 |
| OC1Cc2cc3ccccc4ccc5ccc1c2c5c34                         | 1 |   |
| OCC(CO)(CCBr)CCBr                                      | 1 |   |
| COc1ccc(N[S+](=O)([O-])c                               | 1 |   |

|                                                  |   |   |   |
|--------------------------------------------------|---|---|---|
| CN([C@H]1CC[C@@]2(CCCO2)C[C@@H]1N3CCCC3)C        | 0 |   |   |
| CC(C)(C)c1ccc(CCC=O)cc1                          | 0 |   |   |
| [O-][N+](=O)                                     | 0 | 0 |   |
| [O-][N+](=O)c1ccc(C=C)cc1                        |   |   | 1 |
| CC(=O)C1CCC2C3CCC4=CC(=O)CCC4(C)C:               | 0 |   |   |
| Oc1cccc(O)c:                                     | 0 | 0 | 0 |
| Cc1cc(ccc1N=Nc2cc(c3ccccc3c2N)S(=O)(=O)[O-])c4cc |   |   | 1 |
| CC(C(=O)O)c1ccc(Oc2nccs2)cc1                     | 0 |   |   |
| CC1=CC(=O)C=C2CCC3C4CCC(=O)C4(C)C:               | 0 |   |   |
| N(c1cccc1)c2cccc3cccc23                          | 0 |   |   |
| [O-][N+](=O)c1ccc(cc1)[C@@H]2O[C@                | 0 |   |   |
| CCNC(=O)NC                                       | 0 | 0 | 0 |
| CN(N=O)C(=O)c1c(ncn1C)N(C)C(=O)OC(               | 1 |   |   |
| CN1C=C(C(=O)c2ccc(F)cc12)S(=O)C                  |   |   | 0 |
| CC1=C(CC(=O                                      | 0 |   |   |
| BrCC#N                                           |   |   | 0 |
| Cc1c(C)[nH]                                      | 0 | 0 | 0 |
| Cc1cc2ccccc2c3ccc4C(=O)C(=O)C=Cc4c1              | 1 |   |   |
| CN\C=C/[N+                                       | 0 | 0 |   |
| CN1CCC[C@H                                       | 0 | 0 | 0 |
| Cc1ccc2nsc(NC(=O)CCl)c2c1                        | 1 |   |   |
| Oc1ccc(\C=C                                      | 1 | 0 |   |
| Nc1cc(N)c(cc1N=Nc2ccc(cc2)c3ccc(cc3)             | 1 |   |   |
| BrC[C@](Br)(CCC#N)C#N                            | 0 |   |   |
| Cc1ccc(NO)cc1C                                   | 1 |   |   |
| Oc1cc2ccc(c3ccc4cccc1c4c23)[N+](=O)[             | 1 |   |   |
| CCCCCCCCCCCCCCCC(=O)OCCCCCCCCCCCC(C)C            |   |   | 0 |
| CCN(CC)C(=O)c1ccc(cc1)[C                         | 0 |   |   |
| OC1C=Cc2ncccc2C1O                                | 0 |   |   |
| CNCC[C@H](                                       | 1 | 1 | 1 |
| CCC(C)c1cccc(c1)C(C)CC(CC)c2ccc(C[N+]            | 0 |   |   |
| COC(=O)C12OC1(C)C(O)(NC2=O)C(C)C                 | 1 |   |   |
| COc1cc(Oc2ccc(Cl)cc2Cl)cc(c1)[N+](=O)            | 0 |   |   |
| C\C=C/C=C\C=C\C=C(=O)O)                          | 0 |   |   |
| CC12OC1C3CCCCC3c4cccc24                          | 0 |   |   |
| O=C1CCC(CC1)C2CCCC2                              |   |   | 0 |
| CCCN(C)C(=                                       | 0 | 0 | 0 |
| CC(C)c1ccc(C)c2ccc(C)c2c1                        | 0 |   | 0 |
| CCCCC(O)C1                                       | 0 | 0 |   |
| Clc1c(Cl)c(oc1C(=O)CBr)N(=O)=O                   | 1 |   |   |
| NC1CCCCC1                                        | 0 |   | 0 |
| OC(=N)c1cc(N2CC2)c(cc1N(=O)=O)N(=C               | 1 |   |   |
| CC(O)COc1cc                                      | 0 | 0 | 0 |

|                                                |   |   |   |   |
|------------------------------------------------|---|---|---|---|
| [O-][N+](=O)c1oc(\C=N\c2snc3ccccc23)           | 1 |   |   |   |
| CCC1NC(=O)c2cc(c(Cl)cc2N1)S(=O)(=O)            | 0 |   |   |   |
| Cc1cc(C)nc(SC(=O)OC(C)(C)C)n1                  | 0 |   |   |   |
| CCc1ncnc2cc                                    | 0 | 0 |   | 0 |
| OC(=O)Cc1cc2ccccc2nc1C(                        | 0 |   |   |   |
| CN1CCCC(CN                                     | 1 | 1 |   | 1 |
| CC(C[N+](C)(                                   | 0 | 0 |   | 0 |
| CC[C@H](NC(=O)c1c(C)c(r                        | 0 |   |   |   |
| COc1ccc(cc1)                                   | 0 | 0 | 0 |   |
| CCC1(CC[C@@H](O1)[C@                           | 0 |   |   |   |
| Oc1c(cc2c3ccccc3[nH]c2c1[N+](=O)[O-]           | 1 |   |   |   |
| CC(=O)OCCC1CCCCC1                              |   |   |   | 0 |
| CC(C)(N=O)[N+](=O)[O-]                         | 1 |   |   |   |
| Cc1ccc(N)cc1                                   | 1 |   | 0 |   |
| c1ccc2c(c1)cc3ccc4cccc5ncc2c3c45               | 1 |   |   |   |
| CC(C)CN(C[C                                    | 0 |   |   |   |
| Oc1cccc(c1)[N+](=O)[O-]                        | 1 |   |   |   |
| Nc1ccc2ccccc2c1                                | 1 |   | 0 |   |
| OC[C@H]1O                                      | 0 |   | 1 |   |
| O=C(N1CCCC                                     | 0 | 0 |   |   |
| NCCCCC(=O                                      | 0 | 0 |   | 0 |
| OC(=O)c1ccc(C=O)cc1                            |   |   |   | 0 |
| CC(=O)\C=C\C1=C(C)CCCC1(C)C                    |   |   |   | 0 |
| c1nc[n-]n1                                     |   |   |   | 0 |
| C[C@@]12CC[C@@H](CC1)C(C)(C)O2                 | 0 |   |   |   |
| O=NN1CCN(CC1)N=O                               | 1 |   | 0 |   |
| Oc1c(cc(cc1[N+](=O)[O-])[N+](=O)[O-])          | 1 |   |   |   |
| [O-]C(=O)CF                                    |   |   |   | 0 |
| S(Sc1cccs1)c2cccs2                             |   |   |   | 0 |
| Cc1ccc(CCl)cc1                                 | 0 |   |   |   |
| COP(=O)(SC)SC                                  | 0 |   |   |   |
| [O-][N+](=O)                                   | 0 | 0 |   |   |
| Cc1ccc(cc1)S(=O)(=O)N=C=O                      |   |   |   | 0 |
| CCc1cc2C(=O)CCc2c3ccc4ccccc4c13                | 1 |   |   |   |
| Clc1ccc2c1oc3ccccc23                           | 0 |   |   |   |
| Oc1ccc(C(=O)c2cc(O)c(O)c(O)c2)c(O)c1O          |   |   |   | 1 |
| CC1(C)OC[C@                                    | 0 | 0 |   |   |
| OC(CC(=O)[O-])C(=O)[O-]                        |   |   |   | 0 |
| [O-][N+](=O)c1ccc2[nH]c3c(cccc3c2c1)[          | 1 |   |   |   |
| CNc1ccc(cc1)C(=O)CC(O)CCC(C)C2OC(=O)CC(O)CC(=O |   |   |   | 1 |
| COc1ccc2CC3                                    | 0 | 0 |   | 0 |
| N[S+](=O)([O-])c1ccc(cc1)                      | 0 |   |   |   |
| CC(=O)OC(CC(=O)O)C[N+]                         | 0 |   |   |   |

|                                                |   |   |   |   |
|------------------------------------------------|---|---|---|---|
| N[C@@H]([C@@H]1[C@H]                           | 0 |   |   |   |
| CC(C)(N)[C@@H]1CC[C@](C)(N)CC1                 |   | 0 |   |   |
| Cc1ccc(cc1)N(CC2(O)OCC(O)C(O)C2O)N             |   | 1 |   |   |
| CSCCCN=C=S                                     |   |   | 1 |   |
| CCOC(=O)NC                                     | 0 | 0 |   | 0 |
| Cc1ccc(cc1N(=O)=O)N=N(=O)c2ccc(C)c(            |   | 0 |   |   |
| Clc1ccc2nsnc                                   | 0 | 0 |   | 0 |
| COC(=O)C(C)Oc1ccc(Oc2ncc(cc2Cl)C(F)(F)F)cc1    |   |   | 0 | 1 |
| NC(CSCCCL)C(=O)O                               |   | 1 |   |   |
| CN1CCC(CC1)                                    | 1 | 0 |   |   |
| OC(=O)c1nn(                                    | 0 | 0 |   | 0 |
| CC(=O)OCN(N=O)c1ccccc1                         |   | 1 |   |   |
| CCOC(=O)[C@@](C)(N)Cc1ccc(O)c(O)c1             |   |   | 0 |   |
| Nc1nc2ccc(cc2s1)[N+](=O)[O-]                   |   | 1 |   |   |
| CN1C(=O)N(C)c2ncn(CC(O)CO)c2C1=O               |   |   | 0 |   |
| CCCN(CCC)c1c(cc(cc1[N+](=O)[O-])C(F)(          |   | 1 |   |   |
| CC(C)(N)CO                                     |   |   | 0 |   |
| Oc1ccc(OP2(NP(NP(N2)(Oc3ccc(O)cc3)(            |   | 0 |   |   |
| CCCSP(=O)(OCC)SCCC                             |   |   | 0 |   |
| CC(N)(C(=O)O)c1ccc(cc1)c                       |   | 0 |   |   |
| Nc1cc(ccc1O)[N+](=O)[O-]                       |   | 1 |   |   |
| Cc1ccc(C)c2c1ccc3ccccc23                       |   | 1 |   |   |
| CC(=CCC1C(=O)C(=O)c2ccccc2C1=O)C               |   | 0 |   |   |
| CCCCOC(=O)CC                                   |   |   | 0 |   |
| NC1=NC(=O)NC=C1                                |   |   | 0 |   |
| CC1=NN(C(=O)C1N=Nc2ccc(cc2)S(=O)(=O)[O-])c3cc( |   |   | 0 |   |
| COC(=O)\C=C\c1oc(cc1)[N+](=O)[O-]              |   | 1 |   |   |
| COC(=O)[C@                                     | 0 |   |   |   |
| OC1C2OC2c3c(ccc4ccccc34)C1O                    |   | 1 |   |   |
| Oc1c(I)cc(cc1[N+](=O)[O-])C#N                  |   | 0 |   |   |
| COc1cc(O)c2C(=O)OC3(C)CC(O)C(O)C=C             |   | 0 |   |   |
| CC(=O)N(CC(                                    | 0 | 0 |   |   |
| [O-]C(=O)CCCc1ccccc1                           |   |   | 0 |   |
| CN1[C@H]2C                                     | 0 | 0 |   |   |
| C[C@H](CN(                                     | 0 | 0 |   |   |
| O=C1NOC2=C1CCNC2                               |   |   | 0 |   |
| CC[C@]1(O)C[C@H]2CN(C                          |   | 1 |   |   |
| CCSCCSP(=S)(OC)OC                              |   |   | 0 |   |
| OC1=C(Oc2ccccc2C1=O)c3                         |   | 0 |   |   |
| Oc1ccc2c3ccccc3C(=O)c4cccc1c24                 |   | 1 |   |   |
| FC(F)(F)c1ccccc1                               |   | 0 |   | 0 |
| OC(=O)C(=O)Nc1cccc(c1)c2nnn[nH]2               |   |   | 0 |   |
| OC(=O)CC(O)(CC(=O)[O-])C(=O)[O-]               |   |   | 0 |   |



|                          |   |   |   |
|--------------------------|---|---|---|
| CN(C(CN1CCCC1)c2cccc(O   | 0 |   |   |
| OCC1OC(CC1O)N2C=C(C=CB   | 0 |   |   |
| O=C1[C@@H                | 1 | 1 |   |
| CC(C)c1ccc(C)cc1         |   |   | 0 |
| CCN(CC)c1ccc(N=Nc2ccc(cc |   |   | 0 |
| NC1=NC2=C(               | 0 | 0 |   |
| CC1=C(O)C(=O)CO1         |   |   | 1 |
| Clc1cccc(NS(=O)(=O)c2cc  |   |   | 0 |
| CCCCCCCCCCCCCCCC(=O)O    |   |   | 0 |
| C[n+]1c2cccc2cc3cc(N)ccc |   |   | 1 |
| CCCC(=O)OCCc1cccc1       |   |   | 0 |
| CC(=O)c1cc(NC(=O)Nc2ccc  |   |   | 0 |
| OCC1CO1                  |   |   | 1 |
| [O-]C(=O)CCl             |   |   | 0 |
| CN(C)[C@H]1[C@@H]2[C@    |   | 0 |   |
| OC1C=Cc2c(ccc3c2ccc4ccc  |   |   | 1 |
| CC\C=C/CCCCO             |   |   | 0 |
| NNc1nc(cs1)c2ccc(cc2)N   |   |   | 1 |
| COc1cc(N)c(cc1N)N(=O)=   |   |   | 1 |
| CN[C@H](C)Cc1cccc1       |   |   | 0 |
| OCCNCCNc1c               | 0 |   | 1 |
| Nc1snc2ccc(Cl)cc12       |   |   | 1 |
| O=C1N(C[C@H]2CCCc3cccc1  |   |   | 0 |
| COc1cc2c(C[C@@H]3N(C)    |   | 0 |   |
| COc1ccc2CC3C4C=CC(O)C5   |   |   | 0 |
| [O-][N+](=O)             | 0 | 0 | 1 |
| C[C@@H]1CN(C[C@H](C)N1   |   |   | 1 |
| OC(=O)c1occc1            |   |   | 0 |
| COc1ccc(cc1)             | 0 | 0 | 0 |
| CC1(C)S[C@@H]2[C@H](NC   |   |   | 0 |
| CO[C@H]1[C@@H](O)[C@H](  |   |   | 0 |
| CC1(C)[C@@               | 0 | 0 |   |
| Oc1cccc2ccc3[nH]c4ccc5   |   |   | 0 |
| CC1(C)O[C@               | 0 | 0 |   |
| ClC=C(Cl)Cl              | 0 | 0 | 0 |
| C1C[C@H]2[C@@H]3CC[C@H]  |   |   | 0 |
| Fc1cccc2cc3c(cc12)c4ccc  |   |   | 1 |
| NC(=O)NCC=C              |   |   | 1 |
| COc1cc(OC)nc(NC(=O)NS    |   |   | 0 |
| ONc1ccc(cc1)c2cccc2      |   |   | 1 |
| COc1cc2nc3cccc3c(O)c2    |   |   | 1 |
| C=CN1CCCC1=O             |   |   | 0 |
| Nc1ncnc2c1r              | 0 |   |   |

|                                                 |   |   |   |
|-------------------------------------------------|---|---|---|
| CC1(C)O[C@                                      | 0 | 0 | 0 |
| CCCN1CCC[C@@H]2Cc3[nH]ncc3C[C@@H]12             |   |   | 0 |
| O[C@@H]1[C@H]2O[C@H]2c3cc4ccc5c                 |   | 1 |   |
| CCOC(=O)OC(=O)OCC                               |   | 0 |   |
| CC1(C)[C@@H]2CC[C@@H](C2)C1=C                   |   | 0 |   |
| COC(=O)N                                        |   | 0 | 0 |
| Cc1cccc(Nc2r                                    | 0 | 0 | 0 |
| O=C1NCN(c2                                      | 1 | 1 | 0 |
| OCCCNP(=O)(O)N(CCCl)CCCl                        |   | 1 |   |
| COc1ccc(cc1N)C2=C(N)C(=O)c3ccccc3O:             |   | 1 |   |
| CN1CCN(CC(=O)N2c3ccccc                          |   | 0 | 0 |
| Cc1c(cc(cc1[N+](=O)[O-])[N+](=O)[O-])           |   | 1 |   |
| OS(=O)(=O)c1ccc(Oc2ccc3c4ccccc4C(=C             |   | 1 |   |
| lc1ccc(cc1)C(=O)NCCN2CC                         |   | 0 |   |
| CC(C)(C)c1cc(\C=C\2/SC(=N)NC2=O)cc(c1O)C(C)(C)C |   |   | 1 |
| CCCN(CCC)[C                                     | 1 | 0 |   |
| OCc1c2ccccc2cc3c1ccc4ccccc34                    |   | 1 |   |
| CC(C)(C)OO                                      |   | 1 | 0 |
| CC(C)CC(C)CC(C)CC(C)COC(=O)c1ccccc1C(=O)OCC(C)C |   |   | 0 |
| CN(N=O)c1c                                      | 0 | 0 |   |
| CSC(=[NH2+])N                                   |   | 0 |   |
| Oc1ccc(\C=C                                     | 0 | 0 |   |
| O=Nc1ccc2ccc3cc4ccccc4c5ccc1c2c35               |   | 1 |   |
| [O-][N+](=O)c1cc(c2ccccc3c4ccccc4c1c2:          |   | 1 |   |
| OC1C=Cc2cc3cc(ccc3cc2C1O)N(=O)=O                |   | 1 |   |
| Oc1cc(Cl)ccc                                    | 0 | 0 | 1 |
| Nc1ccc(C(=O                                     | 0 | 0 | 0 |
| COC(=O)C1=                                      | 0 | 0 |   |
| CC1=NC(=C[C@H]2[C@@H]1Nc3ccccc2:                |   | 1 |   |
| CCCCCCCCCCCCCCCC[N+](C)(C)CCCCC                 |   | 0 |   |
| COc1cc(N)c(Cl)cc1C(=O)O                         |   | 0 |   |
| Cc1cccc2c(C)c3ccc4ccccc4c3nc12                  |   | 1 |   |
| COC(=O)[C@                                      | 1 | 0 |   |
| CC(C)(C)C(=O)CCl                                |   |   | 0 |
| CNC(=O)Oc1cc2ccccc2c3ccccc13                    |   | 1 |   |
| O=N(=O)c1ccc2c3CCc3c4c(ccc5ccc1c2               |   | 1 |   |
| CC(C)CC(=O)OCC1=COC(OC(=O)CC(C)C)C              |   | 1 |   |
| CC(=O)Nc1nc2c3ccnc3ccc2n1C                      |   | 1 |   |
| CCN(CC)N(O)N=O                                  |   | 1 | 0 |
| CC(=O)NCc1onc(n1)c2oc(cc2)[N+](=O)[             |   | 1 |   |
| CCCCSCCC(N)C(=O)O                               |   | 0 |   |
| CCC(=O)OC(OP(=O))(CCCCc1ccccc1)CC(=O)N2C[C@@H   |   |   | 0 |
| CCC(=O)OCC(=O)C1(OC(=O)CC)C(C)CC2C              |   | 0 |   |

|                                                 |   |   |   |
|-------------------------------------------------|---|---|---|
| CCCCCCCCCCCCCN(CCCCCCCCCCCC)CCCCCCCCCCCC        |   |   | 0 |
| CC(=Cc1cccc1)C=O                                |   |   | 0 |
| CC(=C)C1CC=C(C)C(=O)C1                          |   | 0 | 0 |
| CC(C)(C)c1cc                                    | 0 | 0 | 1 |
| CCOC(=O)[N-                                     | 0 |   | 0 |
| O1C2C1c3cc4c(cc3c5cccc25)C6OC6c7c               |   | 1 |   |
| SCCOCCOCCS                                      |   |   | 0 |
| CCOC(=O)CNC(=O)CBr                              |   | 0 |   |
| NC(=O)NCC(=O)O                                  |   | 0 |   |
| CCCN1C(=O)N(CCC)c2nc([r                         |   | 0 |   |
| Cc1ccc2c(c1)                                    | 0 | 1 |   |
| Cc1cc(c(N)cc1Cl)S(=O)(=O)O                      |   | 1 | 0 |
| Clc1ccc(cn1)C2CC3CCC2N3                         |   | 0 |   |
| CCCCCCCCc1ccc(Nc2ccc(CCCCCC)cc2)c               |   | 0 |   |
| COC(=O)Nc1nc2cc(O)ccc2[nH]1                     |   | 0 |   |
| OS(=O)(=O)c1cccc2C(=O)c3c(cccc3[N+]             |   | 1 |   |
| [O-][N+](=O)c1ccc2sc3cccc3c2c1                  |   | 1 |   |
| CCc1cccc1[N+](=O)[O-]                           |   | 0 |   |
| CCN(CC)CC                                       |   | 0 | 0 |
| Oc1cc(O)c2cc(O)c([o+]c2c1)c3cc(O)c(O            |   | 0 |   |
| C1CN=C(N\N=C\c2c3cccc3c\C=N\NC4                 |   | 1 |   |
| COc1nsc2cc(OCC3CO3)ccc12                        |   | 1 |   |
| NC1=NC2=C(N(CC=C)C(=O)N2[C@@H]3O[C@H](CO)[      |   |   | 0 |
| NC(=O)OC1CO1                                    |   | 1 |   |
| CN(C)c1ccc(\C=C\c2cccc2)cc1                     |   | 1 |   |
| CC(=O)O[C@@H]1CC2CCC1(C)C2(C)C                  |   |   | 0 |
| NC(CO)C(=O)                                     | 0 | 0 | 1 |
| OC1C=Cc2cc3ccc4c(ccc5ccc(c2C1O)c3c4             |   | 1 |   |
| OC1C=Cc2c(ccc3c4CCCc4ccc23)C1O                  |   | 1 |   |
| CCC12CCC3C(                                     | 0 | 0 |   |
| CC(C)(C)OC(=O)C=C                               |   | 0 | 0 |
| NCCN[S+](=O)([O-])c1cccc                        |   | 0 |   |
| CC(C)(C)c1csc(n1)c2oc3ccc(OCC4cccc4CC(=O)O)cc3c |   |   | 1 |
| C[C@H]1CN(C[C@@H](C)N1)c2c(F)c(N)c3C(=O)C(=Cl   |   |   | 0 |
| COc1cc2CCN:                                     | 0 | 0 |   |
| Clc1cccc1Nc2nc(Cl)nc(Cl)n2                      |   | 0 | 0 |
| C[C@@H]1OCCc2cc3c(cc12)C(C)(C)[C@               |   | 0 |   |
| OC(=O)C[C@H](Cl)C(=O)O                          |   | 0 |   |
| Clc1cc(Cl)cc(Cl)c1                              |   | 0 | 0 |
| Fc1cccc2c1ccc3cccnc23                           |   | 1 |   |
| CN(C)CCCN=C1c2cccc2Nc3c(ccc(c13)N(              |   | 1 |   |
| CC1=CC(=O)C                                     | 0 | 0 | 0 |
| [O-][N+](=O)c1cc(cs1)C(=O)Nc2cccc2B             |   | 1 |   |



|                                                 |   |   |   |   |   |
|-------------------------------------------------|---|---|---|---|---|
| Cc1ccc(NN=NCc2ccccc2)cc1                        |   |   | 1 |   |   |
| CC(=O)Oc1cc                                     | 0 | 0 |   | 0 |   |
| c1ccc2c(c1)c3cccc4cccc2c34                      |   |   | 1 |   | 1 |
| CC(Br)C(Br)COP(=O)(OCC(Br)C(C)Br)OC(            |   |   | 1 |   |   |
| CCOC(=O)c1ccc(I)cc1                             |   |   |   | 0 |   |
| CC(=O)Oc1cc                                     | 0 | 0 | 0 | 0 |   |
| CC1CC[C@]2i                                     | 1 | 0 |   |   |   |
| COC(=O)\C(=C\c1oc(Br)cc1)\C#N                   |   |   | 0 |   |   |
| Cc1c(cc(cc1[N+](=O)[O-])N=[N+](O-])c            |   |   | 1 |   |   |
| OC(=O)c1ccc2C(=O)OC(=O)c2c1                     |   |   | 0 | 0 |   |
| CN(Cc1ccc(Cl)cc1)N=O                            |   |   | 1 |   |   |
| C\C(=C(\CCO)/SSCC1CCCO1)\N(Cc2cnc(C)nc2N)C=O    |   |   |   | 0 |   |
| NC(=O)c1ccc(cc1)N(=O)=O                         |   |   |   | 0 |   |
| Oc1cccc2Oc3cc4OC5OC=CC5c4c(O)c3C(:              |   |   | 0 |   |   |
| O=C1CCCCCCCCCN1                                 |   |   |   | 0 |   |
| CCC[C@@H](C)C[C@@H](OC(=O)C[C@                  |   |   | 0 |   |   |
| CO[C@H]1[C@@H](CC(=O)O[C@H](C)CC2OC2C=CC(=      |   |   |   | 0 |   |
| CC(=O)Nc1ccc(C)c(c1)N=Nc2cc(NC(=O)(             |   |   | 0 |   |   |
| Nc1ccc(cc1)[S+](=O)([O-])                       |   | 0 |   |   |   |
| CCC(=[N+](O)[O-])C                              |   |   | 0 |   |   |
| Cn1c2cccc2c3nn[n+](O-])c(C(=O)OCCC              |   |   | 1 |   |   |
| CN[C@@H](C)Cc1cccc1                             |   |   | 0 | 0 |   |
| CC(C)C(O)C(C)C(C)CO                             |   |   |   | 0 |   |
| NC(=N)c1ccc                                     | 0 | 0 | 0 | 0 |   |
| OC[C@@H]1CC[C@@H](O1)n2cnc3C(=O)NC=Nc23         |   |   |   | 0 |   |
| CNC1(C)C2CCC(C2)C1(C)C                          |   | 0 |   | 0 | 0 |
| CCOC(=O)c1c(N)sc2CN(Cc:                         |   | 0 |   | 0 |   |
| CCOC(=O)C(=NNc1ccc(cc1Cl)c2ccc(NN=              |   |   | 0 |   |   |
| BrC1cc(Br)c(c(Br)c1)c2c(Br)cc(Br)cc2Br          |   |   | 0 |   |   |
| Cc1cnc(cn1)C(=O)NCCc2ccc(cc2)S(=O)(=O)NC(=O)NC: |   |   |   | 0 |   |
| O=N(=O)c1ccc2c(c1)c(cc3cccc(c23)N(=C            |   |   | 1 |   |   |
| OCCN(CCO)CCN(CCO)CCO                            |   |   |   | 0 |   |
| CC(=O)Oc1cc                                     | 0 | 0 |   | 0 |   |
| COC(=O)c1cc                                     | 0 |   |   |   |   |
| CC1CC[C@@                                       | 0 | 1 |   |   |   |
| CN(C1CCN(C                                      | 1 | 0 | 0 |   |   |
| CSc1nc(NC(C)C)nc(N=[N+]=[N-])n1                 |   |   |   | 0 |   |
| ClCCCCl                                         |   |   |   | 0 |   |
| ClC1(Cl)C(=O)C=CC1=O                            |   |   | 1 |   |   |
| [O-][N+](=O)c1ccc2[nH]ncc2c1                    |   |   | 1 |   |   |
| Fc1ccc(cc1)C2OC2C(=O)c3cccc3                    |   |   | 0 |   |   |
| CC(=O)OCC(=                                     | 0 | 0 | 0 | 0 |   |
| CO\N=C(\C(=O)N[C@H]1[                           |   | 0 |   |   |   |

|                                                |   |   |   |
|------------------------------------------------|---|---|---|
| COC12C3NC3CN1c4c(O)c(C)c(N)c(O)c4C             | 1 |   |   |
| Clc1cccc2cccnc12                               | 1 |   |   |
| CN(C)C1Cc2cccc3cccc(C1)c23                     | 1 |   |   |
| NCCCCCCCCC                                     | 0 | 0 |   |
| COc1cccc2C:                                    | 0 | 1 |   |
| CCCC(C)CN                                      | 0 |   | 0 |
| OC(=O)c1ccc(c(c1)N(=O)=O)N(=O)=O               | 1 |   |   |
| NCCOCCO                                        |   |   | 0 |
| COC1=CC(=O)O[C@H](C1)\C=C\c2cccc2              |   |   | 0 |
| Cc1ccc2nc3cc(C)c(N)cc3nc2c1N                   | 1 |   |   |
| COc1ccc(c2C(=NCCCN(C)C)c3cccc3Nc1:             | 1 |   |   |
| CN1[C@H]2CC[C@@H]1[C@H]([C@H](C2)OC(=O)c3c     |   |   | 0 |
| C[C@H]1C[C@H](CC(C)(C)C1)OC(=O)c2c             | 0 |   |   |
| CC(C(=O)O)c1ccc(cc1)C(=O)c2cccs2               |   |   | 0 |
| NC(=N)Nc1ccc(Cl)cc1                            |   | 0 |   |
| OCCN(CCO)c1ccc(cc1)N=Nc2ccc(nc2)N(             | 0 |   |   |
| CNC(C)[C@@H]1CC[C@@H](N)[C@@H](O[C@@H]2        |   |   | 0 |
| NCc1ccc(CN)cc1                                 | 0 |   |   |
| OC(=O)c1cccc(Cl)c1Cl                           | 0 |   | 0 |
| O=C1C=C(C=C(N1N=Cc2oc(cc2)N(=O)=C              | 1 |   |   |
| COc1cc2OC3OC=CC3c2c4OC(=O)C5=C(C               | 1 |   |   |
| CC1=CC2C(C1)C3CC2C(=C3)C                       |   |   | 0 |
| CCC(=O)O[C@                                    | 0 | 0 |   |
| CCC(C)(N=NC(C)(CC)C#N)C#N                      |   |   | 0 |
| O=C\C=C\C1occc1                                |   |   | 0 |
| CC(=O)NN                                       | 1 |   |   |
| Cn1c(ncc1N(=O)=O)C2=NNC(=N)S2                  | 1 |   |   |
| CCOC(=O)c1c(C)[nH]c2ccc:                       | 1 |   |   |
| CCN(CCC#N)c1cc(NC(=O)C)c(cc1OC)n2n             | 1 |   |   |
| NCCCN1CCN(CCCN)CC1                             | 0 |   | 0 |
| NC(=O)CC1CO1                                   | 1 |   |   |
| NC(Cc1ccc(O                                    | 0 | 0 |   |
| Cc1nc(N)c(C)c2[nH]c3cccc3c12                   | 1 |   |   |
| CN(C)C(=O)CNC(=O)Cc1cccc1                      |   |   | 0 |
| CC(C)(CO)N(=O)=O                               |   |   | 0 |
| CC(C)CC(NC(=O)CNC(=O)[C@H](Cc1ccc(O)cc1)NC(=O) |   |   | 0 |
| CC(C)C(=O)OCCOc1cccc1                          |   |   | 0 |
| CCCCN(C)CC                                     | 0 |   |   |
| Nc1ncnc2c1ncn2CC(O)CN=N#N                      | 1 |   |   |
| CC(C)CCCCCOC(=O)c1cccc1C(=O)OCC                | 0 |   | 0 |
| CCCCNC(=O)OCC#Cl                               |   |   | 1 |
| OC1(CCCCC1)C#N                                 | 0 |   | 0 |
| C[C@]12CC[C@H](O)C[C@                          | 1 |   |   |

|                                               |   |   |   |
|-----------------------------------------------|---|---|---|
| COc1cc2OC3OCCC3c2c4OC(=O)C5=C(CC              | 0 |   |   |
| Fc1ccc(c(F)c1)N(=O)=O                         |   |   | 0 |
| Cc1ccccc1CCl                                  |   |   | 0 |
| OC[C@@H](C                                    | 0 | 0 |   |
| CC(=C)C(=O)OCC=C                              |   |   | 0 |
| CN[C@H]1C[C@@H](O[C@H]2C[C@](C                | 1 |   |   |
| CC(=O)N(O)c1ccc(Oc2ccc(Cl)cc2)cc1             | 1 |   |   |
| CC(C)(C)C(=O)OCOC(=O)[C@@H]1N2[C@H](SC1(C)C)  |   |   | 0 |
| CC1(C)C2CCC3(CO3)C1C2                         | 0 |   |   |
| CCCCC(CC)COC(=O)CCCC(=O)OCC(CC)C              | 0 |   |   |
| NC(=O)CN1C[C@H](O)CC1=O                       | 0 |   |   |
| Oc1ccc(Cl)c2                                  | 0 | 0 | 1 |
| CCCCCCCCC                                     | 0 | 0 |   |
| Nc1cc(cc(c1O)S(=O)(=O)O)[N+](=O)[O-           | 0 |   |   |
| CC(=C)[C@@H]1CC=C(C)C(=O)C1                   | 0 |   | 0 |
| COc1cc2ncnc(Nc3cccc(Br)c                      | 0 |   |   |
| OCC1OC(Oc2ccc(O)c3C(=O)c4cccc4C(=             | 1 |   |   |
| Clc1ccccc1CNCC2CCC(CNC                        | 1 |   |   |
| Clc1nccc2c1c                                  | 0 | 0 |   |
| COc1cccc2C(=O)c3c(O)c4C[C@](O)(C[C@H](O[C@H]! |   |   | 1 |
| CCCCC(CC)CO                                   | 0 |   | 0 |
| Oc1cc2C[C@]3(O)COc4c(C                        | 0 |   | 0 |
| CCOP(=O)(NC(C)C)Oc1ccc(SC)c(C)c1              | 0 |   | 0 |
| CC(=O)NBr                                     | 0 | 0 | 0 |
| CN1C(=O)NC                                    | 0 | 0 |   |
| CN(C)[C@@H                                    | 0 | 0 |   |
| N[C@@H](C                                     | 0 | 0 | 0 |
| N#CCc1ccccc1                                  | 0 |   | 0 |
| Cc1ccccc(C)c1N                                | 1 |   | 0 |
| CC(C)[C@@H                                    | 0 | 0 | 0 |
| O=CC=C(c1ccccc1)c2ccccc2                      |   |   | 1 |
| Oc1ccc(C=NN2N=Nc3c([nH]c4cccc34)C             | 1 |   |   |
| C[N+](C)(C)CCCCNCC12C                         | 0 |   |   |
| CCCCCCCCCCCCCN(C)C                            |   |   | 0 |
| C[C@]12CC[C@H]3[C@@H                          | 0 |   |   |
| COC(=O)c1ccc(C)cc1                            | 0 |   | 0 |
| CC(C)(NC(=O)CBr)[C@H]1                        | 0 |   |   |
| OC(=O)c1oc(cc1)N(=O)=O                        | 1 |   |   |
| C1NCC2CC1c3cc4nccnc4cc23                      |   |   | 0 |
| CC(C)(C(=O)c                                  | 0 | 0 | 0 |
| CC[C@@H](C)CCCC(=O)N[C@H](CCN)C(=O)N[C@H]     |   |   | 0 |
| Clc1ccc(Cl)c(c1)N(=O)=O                       | 1 |   |   |
| CCCC(=O)OC(=O)CCC                             |   |   | 0 |

|                                                    |   |   |   |   |   |
|----------------------------------------------------|---|---|---|---|---|
| Cc1cccc(C=C                                        | 0 | 0 | 0 |   |   |
| CC(C)CCC[C@@H](C)[C@@H]1CC[C@@                     |   |   | 0 |   |   |
| Nc1ccc(Cl)c(N)c1                                   |   |   | 1 | 0 |   |
| CC(C)(O)C(=O)O                                     |   |   |   | 0 |   |
| CC(C1CC1)C(O)(Cn2cncn2)c3ccc(Cl)cc3                |   |   |   | 0 |   |
| ClC1=C(Cl)[C@]2(Cl)[C@@H]3[C@@H]4C[C@H](C=C        |   |   |   | 1 |   |
| NCCSC(=N)N                                         | 0 | 0 |   |   |   |
| C1CCc2c(C1)cccc2NC3=NC                             |   | 0 |   | 0 |   |
| C=CCc1ccc2OCOC2c1                                  |   |   | 0 | 0 |   |
| O=C1CCCCCCCCCCCCC1                                 |   |   |   | 1 |   |
| Nc1ccc2ccc3cc4ccccc4c5ccc1c2c35                    |   |   | 1 |   |   |
| COc1nsc2c(N)cccc12                                 |   |   | 1 |   |   |
| CC1=C(O)C(=C(C(=O)C1=O)C2=C(O)C(=C                 |   |   | 0 |   |   |
| Fc1ccc(F)c2ncccc12                                 |   |   | 1 |   |   |
| COc1c(C)c(N)c(C)cc1N                               |   |   | 0 |   |   |
| Nc1ncnc2c1r                                        | 0 |   |   |   |   |
| c1ccc2c(c1)c3cccc4ccc5cccc2c5c34                   |   |   | 1 | 1 |   |
| Nc1cc(ccc1CO)[N+](=O)[O-]                          |   |   | 1 |   |   |
| CCC1(C(=O)N                                        | 0 | 0 | 1 | 0 | 0 |
| C\C(=C/C=C/C(=O)Nc1ccc(O)cc1)/C\C=CC2=C(C          |   |   | 1 |   |   |
| OCc1ccc2c(CO)c3ccc4ccccc4c3nc2c1                   |   |   | 0 |   |   |
| O=C1c2cc(ccc2c3ccc(cc13)N(=O)=O)N(=                |   |   | 1 |   |   |
| ICCc1ccccc1                                        |   |   | 0 | 0 |   |
| CCc1cccc(CC)                                       | 0 | 0 |   | 0 |   |
| COc1ccc2c(c                                        | 0 |   |   |   |   |
| CC(=O)c1ccc2CCCCc2c1                               |   |   |   | 0 |   |
| O=C1C[C@@                                          | 1 | 0 |   |   |   |
| CC(C)CC#N                                          |   |   |   | 0 |   |
| CC1(C)S[C@@H]2[C@H](NC(=O)[C@H](N)c3ccccc3)C       |   |   |   | 0 |   |
| C\C(=C(/CCOC(=O)c1ccccc1)\SC(=O)c2c                |   |   | 0 |   |   |
| OC(=O)[C@H]1C[C@H](N                               |   | 0 |   |   |   |
| Clc1cccc(Cl)c1S(=O)(=O)Cl                          |   |   |   | 0 |   |
| Cc1c(cc(c(N)c1N(=O)=O)N(=O)=O)N(=C                 |   |   | 1 |   |   |
| NC(=O)[C@                                          | 0 | 0 |   |   | 0 |
| CC12CCC(=O)                                        | 0 | 0 |   |   |   |
| NNc1nncc2ccccc12                                   |   | 0 | 1 | 0 |   |
| [S-]C(=S)N1C                                       | 1 | 0 |   |   |   |
| CC1(C)S[C@@H]2[C@H](N                              |   | 0 |   |   |   |
| O[C@H]1C[C                                         | 1 | 0 |   |   |   |
| Cc1cccs1                                           |   |   | 0 |   |   |
| CCN(CC)CCO                                         | 0 | 0 |   | 0 |   |
| CCCCCCCCC                                          | 1 | 0 |   |   |   |
| CC(C)(C)c1ccc(CN2CCN(CC2)C(c3ccccc3)c4ccc(Cl)cc4)c |   |   |   | 1 |   |



|                                           |   |   |  |   |
|-------------------------------------------|---|---|--|---|
| CNCC(O)c1cccc(O)c1                        |   | 0 |  |   |
| OC(=O)c1ccc                               | 0 | 0 |  | 0 |
| CC(=O)Nc1ccc2c(Cc3ccccc23)c1              |   | 1 |  | 1 |
| CCN1CCC[C@H]1CNC(=O)c                     | 0 |   |  | 0 |
| OCNc1ncnc2c1ncn2C3OC(CO)C(O)C3O           |   | 1 |  |   |
| C[C@@H](CC(=O)O)[C@@                      | 0 |   |  |   |
| Cc1nc(N=Nc2cc(ccc2S(=O)                   | 0 |   |  |   |
| COc1cc(cc(OC)c1OC)C(=O)                   | 1 | 0 |  |   |
| Cc1c(C)c2c(N)c3ccccc3nc2c4ccccc14         |   | 1 |  |   |
| CNC(=O)Oc1ccc2N(C)C3N(                    | 0 |   |  |   |
| C[C@H]1O[C@H](O[C@H]2[C@H](O)[C@@H](O)[C@ |   |   |  | 0 |
| Oc1ccc(C(=O)c2ccc(O)cc2O)c(O)c1           |   |   |  | 1 |
| C[C@@H]1[C@@H]2Cc3ccc(O)cc3[C@@]1(C)CCN2C |   |   |  | 0 |
| Cc1oc(cc1)C(=O)O                          |   |   |  | 0 |
| CN(C)CCOC(=                               | 0 | 0 |  |   |
| CCOC1CC2C(C)CC3OC(=O)C(=C)C3CC2(C)        |   | 1 |  |   |
| NC(CS\C=C(/Cl)\C(Cl)(Cl)Cl)\Cl)C(=O)O     |   | 1 |  |   |
| COC1=C[C@@H]2[C@@H]3Cc4ccc(OC)c           |   | 0 |  |   |
| Cn1c(ncc1N(=O)=O)C2NC(CO)(CO)CO2          |   | 1 |  |   |
| Oc1ccccc1C(=O)Nc2ccccc2                   |   |   |  | 1 |
| CC(C)(C)NCC(                              | 0 | 0 |  | 0 |
| CO\N=C(/C(=                               | 0 | 0 |  |   |
| [O-][N+](=O)c1ccc(\C=C\c2cccc(c2)[N+]     |   | 1 |  |   |
| CN(Cc1ccc(F)cc1)N=O                       |   | 1 |  |   |
| OC(=Nc1ccccc1F)c2csc(c2)N(=O)=O           |   | 1 |  |   |
| CC(O)c1ccc2ccc3ccccc4ccc1c2c34            |   | 1 |  |   |
| CC(N)(C(=O)O)c1cccc(CC(=                  | 0 |   |  |   |
| OCC(O)C(O)C(OC1OC(CO)C(O)C(O)C1O)         |   | 0 |  |   |
| CC(C)CC(O)Cc1ccccc1                       |   |   |  | 0 |
| CC(=O)Nc1snc2ccc(Cl)cc12                  |   | 1 |  |   |
| Cc1nc(cn1c2ccc(cc2)N(=O)=O)N(=O)=O        |   |   |  | 0 |
| Nc1ccc(N)c2C(=O)c3c(cccc3N(=O)=O)C(       |   | 1 |  |   |
| CCOc1ccc(NO)cc1                           |   | 1 |  |   |
| CC(=O)OCC[N+](C)(C)C                      |   |   |  | 0 |
| CC(C)C(=O)Nc1snc2ccccc12                  |   | 0 |  |   |
| Cc1cccc(OC[C@@H](O)CNC(C)(C)C)c1C         |   | 0 |  |   |
| Oc1ccccc1                                 |   |   |  | 0 |
| ClCc1cc2c3ccccc3cc4ccc5ccccc1c5c24        |   | 1 |  |   |
| CC(C)(N)C#N                               |   |   |  | 0 |
| CC(C)N(CCCl)C(C)C                         |   |   |  | 0 |
| COc1ccc(cc1N)N(=O)=O                      |   |   |  | 0 |
| CCCCC(=O)O[C@]1(CC[C@H]2[C@@H]3CCCC4=CC(= |   |   |  | 1 |
| CCC(C)N                                   | 0 |   |  | 0 |

|                                              |   |   |   |   |   |
|----------------------------------------------|---|---|---|---|---|
| O=Nc1ccc2ccc3cccc4ccc1c2c34                  |   |   | 1 |   |   |
| CCCCNc1ccc(                                  | 0 | 0 |   | 1 | 0 |
| CC(C)(S)[C@                                  | 0 | 0 |   | 0 |   |
| Nc1c(cccc1N(=O)=O)N(=O)=O                    |   |   | 1 |   |   |
| CC(C)CCC[C@@H](C)[C@H]1CC(=O)C2=C3CC[C@H]4C  |   |   |   | 0 |   |
| NC(=O)OC[C@@H]1[C@H](NC(=O)\C(=N/OCC(=O)[C   |   |   |   | 0 |   |
| C[C@]12CC[C(                                 | 0 | 0 |   |   |   |
| BrCC(Br)c1ccccc1                             |   |   | 1 |   |   |
| CS(=O)(=O)c1ccc(cc1)[C@@H](O)[C@@H](CF)NC(=C |   |   |   | 0 |   |
| Cc1ccc(O)cc1C                                |   |   | 0 | 0 |   |
| COc1cc(cc(O                                  | 0 | 0 |   | 0 |   |
| CC(O)(C[S+](=O)([O-])c1cc                    |   | 0 |   |   |   |
| CCCc1ccccc1O                                 |   |   |   | 1 |   |
| CCOCCOC(=O)\C=C/c1ccc(OC)cc1                 |   |   | 0 |   |   |
| OC[C@H]1O[C@@H](Oc2                          |   | 0 |   |   |   |
| Oc1ncnc2[nH                                  | 0 | 0 |   | 0 |   |
| CC(C)(Oc1ccc(cc1)[C@@H]2CC2(Cl)Cl)C          |   |   | 0 |   |   |
| CC[N+](CC)(C                                 | 1 | 0 |   |   |   |
| CNc1ncnc2c1                                  | 0 |   |   |   |   |
| C=CCOC(=O)c1ccc(C(=O)OCC=C)c(c1)C(=O)OCC=C   |   |   |   | 0 |   |
| CN(C)c1ccc(cc1)N=Nc2ccc(C=O)cc2              |   |   | 1 |   |   |
| COc1ccccc1NC(=O)C(N=Nc2ccc(cc2Cl)c3          |   |   | 0 |   |   |
| Clc1ccc(COC(=O)c2cccc3ccnc23)cc1             |   |   | 0 |   |   |
| O=C1Oc2cc3occc3cc2C=C1                       | 0 |   | 0 |   |   |
| Oc1cc2c3ccccc3c4cccc(c1[N+](=O)[O-])         |   |   | 1 |   |   |
| NC(=O)C12OC1C(O)(NC2=O)c3ccccc3              |   |   | 0 |   |   |
| CCCN1C(=O)I                                  | 0 |   |   |   |   |
| NS(=O)(=O)c1cc2c(NC=NS2(=O)=O)cc1(           |   |   | 0 |   |   |
| FC(F)(F)c1cccc(Cl)c1                         |   |   | 0 | 0 |   |
| O(P(Oc1ccccc1)Oc2ccccc2)c3ccccc3             |   |   | 0 | 0 |   |
| OC(CBr)C(O)C(O)C(O)CBr                       |   |   | 1 |   |   |
| O=C1CN(\N=C\c2oc(cc2)N(=O)=O)C(=O)N1         |   |   |   | 1 |   |
| CC[C@H](C)[C@H]1O[C@@]2(C[C@@H]3C[C@@H](     |   |   |   | 1 |   |
| CCN1C[C@@]2(COC(=O)c:                        |   | 0 |   |   |   |
| CCSCCSP(=O)(OC)OC                            |   |   | 0 |   |   |
| CC[C@H](CC[C@@H](C)[C@H]1CC[C@H              |   |   | 0 | 0 |   |
| NC(=O)Oc1c                                   | 0 | 0 |   | 1 |   |
| CC(C(=O)O)c:                                 | 0 | 0 |   | 0 |   |
| Cc1cc2C(O)C(O)C3OC3c2c4ccc5ccccc5c1          |   |   | 0 |   |   |
| NC1=NC(=O)C2=C(NCC(=N                        |   | 0 |   |   |   |
| O=N(=O)c1cc(cc(c1)N(=O)=O)N(=O)=O            |   |   | 1 |   |   |
| Cc1ccc(\C=C\c2ccc(N)cc2)cc1                  |   |   | 1 |   |   |
| Oc1ccc(\C=C/C#N)\C(=O)                       |   | 0 |   |   |   |

|                                               |   |   |   |
|-----------------------------------------------|---|---|---|
| CN(C)N=Nc1ccc(cc1)C(=O)O                      | 0 |   |   |
| CC(C)(O)c1ccc(CNC(=O)c2cccnc2Oc3ccc(F)cc3)cc1 |   |   | 0 |
| BrC1ccc(Oc2ccccc2)cc1                         |   |   | 0 |
| Fc1cc2cccnc2c3cccnc13                         | 1 |   |   |
| NC(CCONC(=O)C1=C(C)NC(=S)N                    | 0 | 0 |   |
| CCOC(=O)C1=C(C)NC(=S)N                        |   | 0 |   |
| OC(=O)c1cccc(c1)C(=O)O                        | 0 |   | 0 |
| CN(C)c1ccc(cc1)N=Nc2ccc(cc2)N(C)C(=O)C        | 1 |   |   |
| COc1c(C)c2C                                   | 0 | 0 | 0 |
| OCC1OC(CC1O)N2C=C(CCCCl)C(=O)NC2=             | 0 |   |   |
| OC(=O)CN1C                                    | 0 | 0 | 0 |
| CC1(C)[C@@H](C=C(Br)Br)[C@H]1C(=O)O[C@H](C#N  |   |   | 1 |
| Cc1cccc(C)c1NC(=O)c2cc(c(Cl)cc2O)S(=O)(=O)N   |   |   | 0 |
| O1C2C1c3csc3c4csc24                           | 1 |   |   |
| COc1nsc2cccc(c12)[N+](=O)[O-]                 | 1 |   |   |
| CCCCCCCCCCCCOC(=O)C(=C)C                      |   |   | 0 |
| CC(C)c1cc(F)c1                                | 1 | 1 |   |
| C(CNC(c1ccccc1)c2ccccc2)                      |   | 1 |   |
| Fc1ccc(cc1)C                                  | 1 | 0 |   |
| CCC1=C[C@@H]2CN(C1)Cc3c([nH]c4ccccc34)[C@@H]( |   |   | 0 |
| CC(C)Oc1ccc2C(=O)C(=COc2c1)c3ccccc3           | 0 |   |   |
| Cc1cc2ccccc2c3cc4ccccc4cc13                   | 1 |   |   |
| CC(C)CCC[C@@H](C)CCC[C@@H](C)CCC[C@]1(C)CCc1  |   |   | 0 |
| BrC1ccccc1N(=O)=O                             | 1 |   |   |
| OC(=O)c1c(Cl)cccc1Cl                          | 0 |   | 0 |
| CN(C)CCC(c1ccc(O)cc1)C                        | 1 | 0 |   |
| COc1ccc(CC2N(C)CCc3cc(C)cc3)cc1               |   | 0 |   |
| NC(=O)[C@@H]1CCCN1C(=O)[C@H](Cc2c[nH]cn2)NC   |   |   | 0 |
| COc1cc(NC(=O)C)ccc1NC(=O)C                    | 0 |   |   |
| CCCCN(CC(O)CCO)N=O                            | 1 |   |   |
| CC1(CO)C(O)CCC2(C)C(C)C                       |   | 0 |   |
| C[C@@H]1CCC=C2CC[C@H](C[C@@]12C)C(=C)C        |   |   | 0 |
| CC1(C)CC(N)CC(C)(C)N1O                        | 1 |   |   |
| OC(=O)Cc1ccccc1Nc2c(Cl)cccc2Cl                | 0 |   | 1 |
| Cc1ccc(N)c(O)c1                               | 1 |   |   |
| Oc1ccccc1\C=N\NC(=O)c2                        |   | 0 |   |
| CCCCC1C(=O)N(N(C1=O)c2ccc(O)cc2)c3            | 1 |   | 0 |
| CCCCCCCCC(C)(C)C(=O)N                         |   | 0 |   |
| COP(=S)(OC)                                   | 0 | 0 | 1 |
| OC\C=C\CO                                     |   |   | 0 |
| COc1cc(O)c2C(=O)c3c(OC)cc4OC5OC=C(C           | 1 |   |   |
| Oc1cccc2Oc3c4[C@@H]5C=CO[C@H]5C               | 1 |   |   |
| NON(N=O)c1ccccc1                              | 1 |   |   |

|                                                   |   |   |   |
|---------------------------------------------------|---|---|---|
| C[C@H]1COc                                        | 0 | 0 | 0 |
| FC(F)(F)C(Cl)(Cl)Cl                               |   |   | 0 |
| COC(=O)c1ccc(C)cc1C2=NC(=O)C(C)(N2)C(C)C          |   |   | 0 |
| C(\C=C/c1ccc                                      | 1 |   |   |
| Cc1ccc2Cc3cccc4ccc1c2c34                          |   | 1 |   |
| C[C@H]1C[C@H]2[C@@H]3CC[C@H](C(=O)C)[C@@]         |   |   | 0 |
| [O-][N+](=O)c1oc(\C=C\C=N\N2CC(=O)                |   | 1 |   |
| CC1(C)S[C@@H]2[C@@H](NC(=O)[C@                    |   | 0 |   |
| C\C=C(/C)\C=C\C=C(C)C                             |   |   | 0 |
| OC(=O)c1cccc1C(=C2C=C(I)C(=O)C(=C2)I)c3cc(I)c(O)c |   |   | 1 |
| CN1C(C)(C)CC(O)CC1(C)C                            |   |   | 0 |
| CCC(CO)CO                                         |   |   | 0 |
| CCC(C)(c1ccc(O)cc1)c2ccc(O)cc2                    |   |   | 1 |
| COc1ccc2C(=O)C=C(Oc2c1                            |   | 0 |   |
| CC1(OC(=O)N(Nc2cccc2)C1=O)c3ccc(Oc4cccc4)cc3      |   |   | 1 |
| Nc1cccc1C(=O)Oc2ccc3cccc3c2                       |   |   | 1 |
| CCCN1C[C@H](C)N(C[C@H                             |   | 0 |   |
| CCCCCCCCCCCCC(=O)OCC(O)c1oc(O)                    |   | 0 |   |
| O=C1CCCC(=O)C1                                    |   |   | 0 |
| C[C@@H]1(C                                        | 0 |   |   |
| CCCCOc1ccc2nc3cc(Cl)ccc3c(NCCCNCCCC               |   | 1 |   |
| C[C@](O)(CS                                       | 0 |   | 1 |
| COC(=O)C1O\C(C=N/O)\C(=C1Cl)Cl                    |   | 0 |   |
| CCCCCCCCc1ccc(OP(=O)(Oc2cccc2)Oc                  |   | 0 |   |
| COc1ccc2C(=O)c3c(OC)c(OC)cc4ccnc(c2               |   | 1 |   |
| CC(C)CN(C[C@@H](O)[C@                             |   | 0 |   |
| O=N(=O)c1ccc2[nH]c3ccc(cc3c2c1)N(=C               |   | 1 |   |
| Clc1ccc(c(Cl)c1)C2(Cn3cnc                         |   | 0 |   |
| Nc1ccc(O)c2C(=O)c3cccc3C(=O)c12                   |   | 1 |   |
| OC(=O)CCOP(=N)(O)N(CCCl)CCCl                      |   | 1 |   |
| Nc1ccc(N=Nc2ccc(cc2)S(=O)(=O)O)c(N)               |   | 1 |   |
| FC(F)(F)c1ccc(CCl)cc1                             |   | 0 |   |
| CCCCC(CC)COC(=O)CCCCCCCC(=O)OCC(                  |   | 0 |   |
| COc1cc(NS(=O)(=O)C)ccc1Nc2c3ccc(cc3               |   | 1 |   |
| CN(C)C(=O)N                                       | 0 | 0 | 1 |
| [O-][S+](CCC1C(=O)N(N(C                           |   | 0 |   |
| CCCCCOc1cccc1C(=O)O                               |   |   | 0 |
| Nc1ccc(cc1)[S+](=O)([O-])                         |   | 0 |   |
| CCCCNC(=S)NCCCC                                   |   |   | 0 |
| OCc1ccc2C(=O)c3cccc3C(=O)c2c1                     |   | 0 |   |
| C1CCCCC2OC2CCCC1                                  |   | 0 |   |
| Cc1ccc2c(C)cccc2c1                                |   | 0 |   |
| C[C@@H]1C[C@H]2OC(=O)C(=C)[C@H]                   |   | 0 |   |

|                                        |   |   |   |   |
|----------------------------------------|---|---|---|---|
| CCCCCCCCCCCC[n+]1ccc(                  | 0 |   |   | 1 |
| Cc1cccc(Oc2cccc2)c1                    |   |   |   | 0 |
| Cc1ccc(cc1)S(=O)(=O)O                  |   |   |   | 0 |
| OC(C1CCN(Cc2cccc2)CC1                  | 1 |   |   |   |
| OC(=O)c1cc(cc(c1)S(=O)(=O)[O-])C(=O)O  |   |   |   | 0 |
| O=N(=O)c1ccc2oc3cccc3c2c1              |   | 1 |   |   |
| CCCCCCCC\C=C\CC1CC(=O)OC1=O            |   |   |   | 0 |
| CC1CCC2C(C)C(O)OC3O[C@                 | 0 |   |   |   |
| CC(C)OC1OC(=O)C(=C1Cl)Cl               |   | 1 |   |   |
| Nc1nc(N)c2[nH]cnc2n1                   |   | 0 |   |   |
| CC(C)c1c(C(=O)Nc2cccc2)                | 0 |   |   |   |
| Cc1ccc(N)cc1O                          |   | 1 |   |   |
| CCCNC(=O)N                             | 0 | 0 |   | 0 |
| [I+]1c2cccc2c3cccc13                   | 0 |   |   |   |
| N#Cc1cccc1C#N                          |   | 0 |   | 0 |
| [O-][N+](=O)c1cc(cs1)C(=O)Nc2ccc(Cl)c  |   | 1 |   |   |
| COc1cccc(c1)C(=O)CBr                   |   | 0 |   |   |
| CC(Cc1ccc2OCOc2c1)C=O                  |   |   |   | 0 |
| Oc1ccc(cc1)C(=O)N\C=C/c2oc(cc2)N(=O)=O |   |   |   | 1 |
| C[C@@H]1Cl                             | 0 | 0 |   |   |
| ClCC(=O)c1cc                           | 0 | 0 |   | 0 |
| CN(N=O)c1ccncc1                        |   | 0 |   |   |
| N[C@@H](Cl                             | 0 | 0 | 0 | 0 |
| [O-][N+](=O)C1CCCC1[O-]                |   | 1 |   |   |
| C1O[C@H]1[C@H]2CO2                     |   | 1 |   |   |
| C1O[C@@H]1c2c3cccc3cc4cccc24           |   | 1 |   |   |
| CCCCC(=O)N                             | 0 | 0 | 0 | 0 |
| OC(=O)COc1c                            | 0 | 0 | 0 | 0 |
| OC(=O)CC(C(=O)O)S(=O)(=O)O             |   |   |   | 0 |
| ClC(Cl)C(=O)C(Cl)Cl                    |   | 1 |   |   |
| C[C@@]12N[C@@H](Cc3c                   | 0 |   |   |   |
| O=C1OCCN1\N=C\c2oc(cc2)N(=O)=O         |   |   |   | 0 |
| Clc1cnc(Oc2c                           | 0 | 0 | 0 | 1 |
| ClCOCl                                 |   |   |   | 0 |
| Oc1ccc(Nc2ccc3cccc3c2)cc1              |   | 0 |   |   |
| CC1=C(CCN2c                            | 1 | 0 |   | 0 |
| Oc1cccc1C2=CC(=O)c3ccc                 | 0 |   |   |   |
| OC(=O)C=C                              | 0 | 0 | 0 | 0 |
| Cl[C@@H](Br)C#N                        |   | 1 |   |   |
| O=C1CCCC(=O)O1                         |   |   |   | 0 |
| [O-][N+](=O)c1ccc2NC(=O)C(=O)c2c1      |   | 1 |   |   |
| Nc1cccc2ncccc12                        |   | 1 |   |   |
| Oc1c2nc3cccc3c2nnn1\N=C\c4cccc4        |   | 1 |   |   |

|                                                 |   |   |   |
|-------------------------------------------------|---|---|---|
| [O-][N+](=O)c1ccc(cc1)C(=O)OCC2CO2              | 1 |   |   |
| OC(=S)c1ccccc1                                  | 0 |   |   |
| C[C@@]12CCCC[C@](C)([C@H]1CC[C@@]34C[C@@@H]([C@ |   | 0 |   |
| OP(=O)(O)CF                                     | 0 | 0 | 0 |
| Nc1ccc(c2ccc(N)cc2[N+](=O)[O-])c(c1)[           | 1 |   |   |
| CCCCCCCCC(                                      | 1 | 0 | 1 |
| OC(=O)CC1=I                                     | 0 | 0 | 0 |
| COc1ccc2nc(                                     | 0 | 0 | 1 |
| CC(=O)\C=C\C1C(=CCCC1(C)C)C                     |   |   | 0 |
| CC(C)(C)C=C                                     | 0 | 0 | 0 |
| CC(Cc1ccc(OCC(=O)[O-])cc                        |   | 0 |   |
| O\N=C/1\C(=                                     | 0 | 0 |   |
| Cc1ccc(C)c2c1c3ccccc3n2C                        |   | 1 |   |
| NC(Cc1c[nH]c2ccc(O)cc12)C(=O)O                  | 0 |   |   |
| Cc1ccn2nc(nc2n1)S(=O)(=O)Nc3c(F)cccc3F          |   |   | 0 |
| CCOS(=O)(=O)c1ccc(C)cc1                         | 1 |   |   |
| CC(O)Cn1c(C)ncc1N(=O)=O                         |   |   | 0 |
| [O-][N+](=O)c1ccc(\C=C\c2ccc(cc2)C#N            | 1 |   |   |
| CC1(C)OC2CC                                     | 0 |   |   |
| o1c2ccccc2c3ccccc13                             | 0 |   | 0 |
| CNc1ccc(O)cc1                                   | 1 |   | 1 |
| C[C@@H](O)[C@@H](CO)NC(=O)[C@@H]1CSSC[C@        |   |   | 0 |
| CCOc1ccc(cc1)C(=O)OCCN                          |   | 0 |   |
| CC(=CCC\C(=C/CO)\C)C                            |   |   | 0 |
| [O-][N+](=O)c1ccc2c(c1)nc(\C=N\OCc3c            | 1 |   |   |
| OCC1OC(CC1O)N2CC(=O)C(=N)NC2=O                  | 0 |   |   |
| Cc1cc(ccc1[N+](=O)[O-])C(=O)O                   | 1 |   |   |
| CCOP(=S)(OCC)O\N=C(/C#N)\c1ccccc1               |   |   | 0 |
| Nc1cc(Cl)c(NC2=NCCN2)c(Cl)c1                    |   |   | 0 |
| C[C@]12O[C                                      | 0 | 0 | 1 |
| CC(=O)CC(C)(C)O                                 | 0 |   | 0 |
| CC(=O)OCC(=O)[C@]1(CC[C@H]2[C@@                 | 0 |   |   |
| C[S+](=O)([O-])OCCCCO[S                         |   | 0 |   |
| O=C1NCCN1c2nccs2                                | 1 |   |   |
| CCC1(CC)C(=(                                    | 0 | 0 | 0 |
| C[C@H]1CN(                                      | 0 | 0 |   |
| CCOC(=O)C[C@@H](SP(=O)(OC)OC)C(=                | 0 |   |   |
| OC1COC(C(O)C1O)N(N=O)c2ccc(cc2)C(=              | 1 |   |   |
| ClCC=Cl                                         |   |   | 0 |
| COc1ccc2C=C(Oc3ccccc1c23)N(=O)=O                | 1 |   |   |
| CC(COc1ccc(cc1)C(C)(C)C)OS(=O)OCCCl             |   |   | 0 |
| CC1(C)S[C@@H]2[C@H](NC(=O)[C@H](C(=O)[O-])c3    |   |   | 0 |
| CC(O)COCC(C)O                                   | 0 |   | 0 |

|                                                  |   |   |
|--------------------------------------------------|---|---|
| COC(=O)c1oc(NOC(=O)C)c(c2ccccc2)c1c              | 0 |   |
| OC(=O)[C@H](O)C                                  | 0 | 0 |
| Nc1ccc(N=Nc2ccc(cc2)c3ccc(cc3)N=Nc4c(N)c5c(O)c(l |   | 1 |
| [O-][N+](=O)c1ccc2NCCc2c1                        | 1 |   |
| CC(=O)SCC[N]                                     | 0 | 0 |
| CC(=O)c1c(cc([N+](=O)[O-])n1[N+](=O)             | 1 |   |
| CCCC(C)C(OC(=O)CC(CC(=O)O)C(=O)O)                | 0 |   |
| CCCOc1ccc2[                                      | 0 |   |
| OC(=O)CCC(NC(=O)COc1cc(Cl)c(Cl)cc1Cl             | 0 |   |
| C[N+](=O)C1(C)CC(                                | 0 | 0 |
| NCCN[S+](=O)([O-])c1cccc                         | 1 |   |
| O=C1c2ccccc2c3ccc(cc13)N(=O)=O                   | 1 |   |
| Nc1nc2cc(Cl)c(Cl)cc2s1                           | 0 |   |
| COc1ccc2[nH                                      | 0 |   |
| ONc1cc[n+](O)c2ccccc12                           | 1 |   |
| COc1cc(cc(C(=O)NCC2CCCl                          | 0 |   |
| Cc1cc(N)c(c(C)c1N)[N+](=O)[O-]                   | 0 |   |
| Nc1ccccc1S(=O)(=O)O                              | 1 |   |
| CCCCCCCCCCCCCCCCOC(=O)CCCCCCCC                   | 0 |   |
| NC1(CCC1)C(=O)O                                  | 0 |   |
| [O-][N+](=O)c1ccc(SSc2ccc(cc2)[N+](=O)C          | 1 |   |
| CC1COc2c3N1C=C(C(=O)O)C(=O)c3cc(F)               | 0 |   |
| CN(CCCOc1c                                       | 1 | 0 |
| CCC(=O)[N+](O)[O-]Cl                             | 1 |   |
| Cc1c(ccc2ccccc12)[N+](=O)[O-]                    | 1 |   |
| OC1C(O)c2ccc3c(ccc4ccccc34)c2C5OC15              | 1 |   |
| ONc1cccc2ccccc12                                 | 1 |   |
| NC(=O)[C@@H](O)C1C[C@@H](O)C2(=O)C3cc(F)ccc3     | 0 |   |
| COC(=O)C(C)                                      | 0 |   |
| ONc1ccccc1                                       | 1 |   |
| [O-]C(=O)c1cc(Oc2ccc(cc2Cl)C(F)(F)F)ccc1N(=O)=O  | 0 |   |
| OC1=C(Oc2cc(O)cc(O)c2C1=O)c3ccc(O)c              | 1 | 1 |
| ClC(Cl)(Cl)C[C@H](O)C1CO1                        | 1 |   |
| Cc1ccc(cc1)N(CCCl)CCCl                           | 0 |   |
| ClC(=O)CCc1ccccc1                                | 1 |   |
| CCc1ccc(cc1)[N+](=O)[O-]                         | 0 |   |
| [O-][N+](=O)c1ccc2OC(=O)c3ccccc4ccc1c            | 1 |   |
| CCOc1nc(F)cc2nc(nn12)S(=O)(=O)Nc3c(Cl)cccc3Cl    | 0 |   |
| CNC(=O)ON(C(=O)NC)C(=O)NC                        | 0 |   |
| COc1ccc(\C=C\C(=O)c2ccc                          | 0 |   |
| CC(=C)C1CCC(=C)C2C1C=C(C)C(=O)C3=C               | 0 |   |
| CCC(=O)[N+](O)[O-]                               | 0 |   |
| CCOC(=O)[C@H](O)C1(CCCc1ccccc1)N[C@@H](O)C2C     | 0 |   |

|                                              |   |   |   |   |
|----------------------------------------------|---|---|---|---|
| Oc1cccc2ccc3c4ccccc4ccc3c12                  | 1 |   |   |   |
| CC(=CCOC(=O)C)C                              |   | 0 |   |   |
| CC1(CO1)c2ccccc2                             | 1 |   |   |   |
| COc1cc(O)c2C(=O)c3c(O)cc(C)c(O)c3C(=         | 1 |   |   |   |
| Cc1cc(N=Nc2ccc(cc2)S(=O)(=O)O)c(N)c          | 1 |   |   |   |
| Nc1cc2ccccc2cc1N                             | 1 |   |   |   |
| Nc1ccc(cc1)S                                 | 0 | 0 |   | 1 |
| CC(C)(C)COC(=O)C=C                           | 0 |   |   |   |
| NC1=NC(=O)c2nc(CNc3ccc(cc3)C(=O)N[C@@H](CCC( |   | 0 |   |   |
| Cc1nnc(O)nc1O                                | 0 |   |   |   |
| NC(CCC(=O)N(CC(=O)O)C(=O)C(N)CSN=            | 1 |   |   |   |
| [O-][S+](=O)(N1CCNCC1)c                      | 0 |   |   |   |
| CC(=N(=O)[O-])C                              | 1 |   |   |   |
| [O-][N+](=O)c1cccc2csnc12                    | 1 |   |   |   |
| Clc1ccc(cc1)C(=O)ON(OCC2ccccc2)C(=O          | 1 |   |   |   |
| CCCCC(CC)COC(=O)c1ccc(N(C)C)c(c1)N(-         | 1 |   |   |   |
| C[C@@H]1CCCCN1N=O                            | 1 |   |   |   |
| CCCCCN(N=O)C(=N)NN(=O)=O                     | 1 |   |   |   |
| CCNC[C@H]                                    | 1 |   |   |   |
| C1Cc2scnc2c3cccnc13                          | 0 |   |   |   |
| Oc1ccc(\C=N\c2snc3ccccc23)cc1                | 1 |   |   |   |
| Cc1onc(c1C(=O)N[C@H]2[C@H]3SC(C)(C)[C@@H](N: |   | 0 |   |   |
| Cc1cccc(Cl)c1                                |   | 0 |   |   |
| Cc1onc(O)c1C[C@@H](N)                        | 0 |   |   |   |
| C[C@@]12[C@H]3CC[C@]                         | 0 |   |   |   |
| CC(=O)Nc1nc2C3=CCCN(CC=C)C3CCc2s1            | 0 |   |   |   |
| OC(=O)c1ccc                                  | 0 |   | 0 |   |
| CCCCC(CC)COC(=O)c1cccc1C(=O)OCC(C            | 0 |   |   |   |
| CNc1ncnc2c1ncn2[C@@H]                        | 0 |   |   |   |
| OCCc1cccc1[N+](=O)[O-]                       | 1 |   |   |   |
| OCC(COCC=C)(COCC=C)COCC=C                    |   |   | 0 |   |
| C[C@@H](S)C(=O)NCC(=O)O                      | 0 |   |   |   |
| CN(C)c1ccc(C=Cc2ccc(cc2)N(=O)=O)cc1          | 1 |   |   |   |
| CCCCC(CC)CC                                  | 0 |   | 0 |   |
| CN(C)N=Nc1                                   | 0 |   | 0 |   |
| Cc1cc(cc(C)n1)c2cc3N(C4CC4)C5=CC(=O          | 1 |   |   |   |
| CC1CCN(CC[C@H]2CCCN2[                        | 1 |   |   |   |
| BrCc1cccc2c3cccc4cccc(c12)c34                | 1 |   |   |   |
| CCN(CC)C(C)CN1c2ccccc2Sc3ccccc13             |   |   | 0 |   |
| CCCCC(CC)COC(=O)c1cccc1C(=O)O                | 0 |   | 0 |   |
| CCCCCCCCN1CCCC1=O                            |   |   | 0 |   |
| ClC(Cl)(Cl)SN1C(=O)[C@@H]2CC=CC[C@           | 1 |   |   |   |
| CN[C@H]1CC                                   | 1 |   | 1 |   |



|                                            |   |   |   |   |
|--------------------------------------------|---|---|---|---|
| CCN(CC)C(=O                                | 0 | 0 |   |   |
| CCCC(CCC)C(=O)[O-]                         |   | 0 |   | 0 |
| CC1=CNC(=O)N(CCCN2CCN                      |   | 0 |   |   |
| [O-][n+]1onc                               | 1 |   |   |   |
| OC[C@H]1O[C@@H](OC(                        |   | 0 |   |   |
| NCCCCN                                     | 0 | 0 |   |   |
| CC1(C)\C(=C\                               | 0 | 0 |   |   |
| CCOC(=O)C[C@H](SP(=S)(OC)OC)C(=O)(         |   |   | 0 |   |
| Clc1cccc(c1)c2oc3ccccc3n2                  |   |   | 0 |   |
| CCCCCCCCC(CO)CCCCC(                        |   | 0 |   | 0 |
| COc1c(nc(C                                 | 0 | 0 |   |   |
| CN(C)c1ccc2r                               | 0 | 0 | 1 | 1 |
| NC(C(=O)O)c1cc(O)ccc1Cl                    |   | 0 |   |   |
| O1C2C1c3cc4cc5ccccc5cc4c6cccc2c36          |   |   | 1 |   |
| CC(CO)(CO)CO                               |   |   |   | 0 |
| O=N(=O)c1ccc2Oc3ccc(cc3Oc2c1)N(=O)         |   |   | 1 |   |
| BrN1C(=O)CCC1=O                            |   |   | 1 |   |
| Cc1c(Cl)cccc1                              | 0 | 0 |   | 1 |
| Nc1cccc2cc3ccccc3cc12                      |   |   | 1 |   |
| lc1ccc(NC(=N)NC2C3CC4C(                    |   | 1 |   |   |
| Oc1ccc(O)cc:                               | 0 | 0 | 0 | 0 |
| OC1CCCc2c1c(c3ccc4cccc5ccc2c3c45)[N        |   |   | 0 |   |
| CCCCn1cc[n+](C)c1                          |   |   |   | 0 |
| CC(=O)Oc1ccc(cc1Cl)N(=O)=O                 |   |   |   | 1 |
| CC(C)NC(=N)NC(=N)Nc1cc                     |   | 0 |   | 0 |
| S(Sc1cccc1)c2cccc2                         |   |   |   | 0 |
| O=C1NC=Nc2[nH]cc(CN3CCCC3)c12              |   |   |   | 0 |
| OC1CC(=O)c2c(O)ccc3c4ccc(O)c5C(=O)C        |   |   | 1 |   |
| C[C@H](Cc1c                                | 0 |   |   |   |
| CCOC(=O)N(CCOC(=O)C)N=O                    |   |   | 1 |   |
| CC(\C=C/C#N)\c1ccc(F)cc1)C(C#N)c2          |   |   | 0 |   |
| CN(C)CCC=C1c2ccccc2CCc3                    |   | 1 | 0 |   |
| CCOC(=O)C(C#N)C1C(=C(N                     |   | 0 |   |   |
| CN1C(=O)CN=C(c2ccccc2F)c3cc(ccc13)N        |   |   | 1 |   |
| CCC(C1OC(C                                 | 0 | 0 |   |   |
| CC1(C)S[C@H]2[C@@H](N                      |   | 0 |   |   |
| CC(C)C[C@H]                                | 0 | 0 |   | 0 |
| O=C1OC(=O)c2cc(ccc12)c3ccc4C(=O)OC(=O)c4c3 |   |   |   | 0 |
| Cc1ccc(C)c(O)c1C                           |   |   | 0 | 0 |
| Cn1cnc(c1Sc2ncnc3[nH]cnc23)N(=O)=O         |   |   | 1 |   |
| CCC(=O)NC1CC(c2ccccc2)c                    |   | 1 |   |   |
| OC1C=Cc2c(cc3ccc4ccc(c5ccc2c3c45)[N-       |   |   | 1 |   |
| BrCc1ccc2c3cccc4cccc(c2c1)c34              |   |   | 1 |   |

|                                              |   |   |   |
|----------------------------------------------|---|---|---|
| CO[C@H]1[C@@H](O)C[C@H](O[C@H]2[C@@H](O)     | 1 |   |   |
| ClC(=O)c1ccc(cc1)C(=O)Cl                     | 1 | 0 |   |
| O=C1N(C[C@H]2CO2)C(=O)N(C[C@H]3C             | 1 |   |   |
| CCOc1ccc2nc                                  | 0 |   | 0 |
| CCCCC(CO)CCC                                 |   |   | 0 |
| COc1cc(CC2NCCc3cc(O)c(O)cc23)cc(OC)          | 0 |   |   |
| N[C@H](C(=O)O)c1ccc(cc1)                     | 0 |   |   |
| Nc1ccc(\C=C\c2cccc(N)c2)cc1                  | 1 |   |   |
| CCOc1cccc2ccnc12                             | 0 |   |   |
| Fc1cccc1C2=N[C@H](NC(=O)c3cc4cccc4[nH]3)C(=C |   |   | 0 |
| CCCCCCCCCCCC[C@@H]                           | 0 |   |   |
| CC(=O)[C@H]1CC[C@H]2[C@@H]3CC=C4C[C@@H](C    |   |   | 0 |
| [O-][N+](=O)c1ccc(c1C=O)[N+](=O)[O-          | 1 |   |   |
| CN(C)P(=O)(N(C)C)N(C)C                       | 0 |   | 0 |
| CC12CCC3C(CCC4=CC(=O)NCCC34C)C1CC            | 0 |   |   |
| CCCCC\C=C/CCCCCOC(=O)C                       | 0 |   |   |
| CC(C)c1ccc(cc1S(=O)(=O)C)C(=O)N=C(N)N        |   |   | 0 |
| CCCC(C)(COC                                  | 0 | 0 | 0 |
| C[C@@H]1CC[C@@]2(OC1)O[C@H]3C[C@H]4[C@@      |   |   | 0 |
| CC[C@@]1(O)CC2CN(CCC3                        | 1 |   |   |
| Oc1cc2ccc3cc4cccc4c5ccc(c1)c2c35             | 1 |   |   |
| CC(C)C1=CC(=O)C(=CC1=O)C                     | 0 |   |   |
| Cc1cc(ccc1N)S(=O)(=O)O                       | 0 |   |   |
| OCCOCCOCCOCCO                                |   |   | 0 |
| C\C=C/CCOC(=O)c1cccc1)\SS\C=C(\C)/N(Cc2cnc(C |   |   | 0 |
| COP(=S)(OC)OC                                | 0 |   |   |
| CCNc1nc(NC(C)C)nc(SC)n1                      |   |   | 0 |
| CCOc1cccc1N                                  | 0 |   | 0 |
| CC(C)(C)C(=O)Oc1ccc(cc1)                     | 0 |   |   |
| CC1(C)SC2[C                                  | 0 | 0 |   |
| CCOC(=O)C1=                                  | 0 | 1 |   |
| C=COCCOCCOCCOC=C                             |   |   | 0 |
| CO[C@H]1[C                                   | 0 | 0 |   |
| NCCc1cc(O)c                                  | 0 | 0 | 1 |
| CCOC(=O)NC(C)(C)Cc1ccc(Cl)cc1                |   |   | 0 |
| COc1ccc(N)cc1N                               | 1 |   | 1 |
| CC#C[C@]1(C                                  | 0 | 1 | 1 |
| C1CCNC1                                      | 0 |   |   |
| COP(=S)(OC)Oc1ccc(N)c(C)c1                   | 1 |   |   |
| CC(=O)OCCOCCOCCOC(=O)C                       | 1 |   | 0 |
| CCCC[N+](C)[C@H]2CC(C[C@@H]1[C@H]3O[C@@H     |   |   | 0 |
| CCN(CCO)c1cccc(C)c1                          |   |   | 0 |
| C1=Cc2cc3cccc4c5cccc5c6ccc1c2c6c34           | 1 |   |   |

|                                                 |   |   |   |
|-------------------------------------------------|---|---|---|
| O[N+](=C=Cc1ccccc1)[O-]                         | 1 |   |   |
| OCc1cc2ccccc2c3ccc4ccccc4c13                    | 1 |   |   |
| CC[C@H](CC[C@@H](C)C1                           | 0 |   |   |
| Nc1ccc(cc1Cl)[N+](=O)[O-]                       | 1 |   |   |
| O=N(=O)c1cc(c2ccc3ccccc4ccc1c2c34)N(            | 1 |   |   |
| O=Nc1ccc(cc1)c2ccccc2                           | 1 |   |   |
| CC(=O)Nc1ccc(Oc2ccc(cc2)N(O)C=O)cc1             | 1 |   |   |
| C[C@H]1C(=O)O[C@H]2C(                           | 0 |   |   |
| COc1cc(N)c(OC)cc1N                              | 1 |   |   |
| Cc1ccc(N=Nc2c(O)ccc3ccccc23)c(c1)N(=            | 1 |   |   |
| CCCCCCCCOCC1CO1                                 |   |   | 0 |
| CC1=Nc2ccccc2C(=O)N1c3ccccc3C                   |   |   | 0 |
| Cc1ccc(cc1)C                                    | 0 | 0 | 0 |
| CC(=O)Nc1ccc2ccc3c(O)ccc4ccc1c2c34              | 1 |   |   |
| O[C@H]1CCCN(C1)N=O                              | 1 |   |   |
| CC(C)[C@H](N)C(=O)OCC(CO)OCn1cnc2C(=O)N=C(N)    |   |   | 0 |
| CN1CC[C@@]23CCCC[C@@H]2[C@@H]1Cc4ccc(C)cc       |   |   | 0 |
| Cc1cc(O)cc2OC(=O)c3c(O)cc(O)cc3c12              | 0 |   |   |
| CC(=O)c1c(O)c2C3C(Cc4ccccc5[nH]cc3c4!           | 0 |   |   |
| CCNC(=O)NC(=O)\C(=N\OC)\C#N                     |   |   | 0 |
| COc1cc(OC)c2cc(c3c(cc4OCOC4c3c2c1)C             | 0 |   |   |
| C[N+]1(C)[C(                                    | 0 | 0 |   |
| COc1cc(cc(O                                     | 0 | 0 |   |
| ClCCN(CCCl)F                                    | 0 | 0 | 1 |
| CCCN(CCC)c1c(cc(cc1N(=O)=O)S(=O)(=O)N)N(=O)=O   |   |   | 1 |
| NC[C@H]1O[C@H](O[C@@H]2[C@@H](N)C[C@@H          |   |   | 0 |
| C=CC(=O)OCCOCCOCCOCCOC(=O)C=C                   | 0 |   | 0 |
| COc1ccc(\C=                                     | 0 | 0 | 0 |
| O=N(=O)c1ccc(cc1)c2ccc(cc2)N(=O)=O              | 1 |   |   |
| CCC(CO)(CO)COCC(CC)(CO)CO                       |   |   | 0 |
| CC(C)(C)CC(C                                    | 1 | 0 | 0 |
| CC(C)CC(C)CC(O)CC(C)C                           |   |   | 0 |
| CCN(CC)CCO(                                     | 1 | 1 |   |
| CCn1c(N)nc2c3cccn3ccc12                         | 1 |   |   |
| COC1=CC(=O)OC(=C1)\C=C\c2ccc(OC)cc2             |   |   | 0 |
| CCOc1ccc(NC(=O)N)cc1                            | 0 |   | 0 |
| CCC(O)OCC(C)OC(O)CC                             |   |   | 0 |
| [O-][N+](=O)c1cc(c2c(cc(cc2c1)[N+](=C           | 1 |   |   |
| CCCc1nc(C)c2                                    | 0 |   | 0 |
| CC(C)(S)C(=O)N[C@@H](CS)C(=O)O                  |   |   | 0 |
| OCN1C(=O)C                                      | 0 | 0 |   |
| CCN1CCC2(CC1)COc3cc4CCN(C(=O)c5ccc(cc5)c6ccc(cc |   |   | 1 |
| ClCc1ccc2ccccc3c4ccccc4c1c23                    | 1 |   |   |

|                                                 |   |   |
|-------------------------------------------------|---|---|
| CCCC(=C)C=O                                     | 1 |   |
| CC(C)(C)C(Br)C(=O)Nc1ccccc1                     | 0 |   |
| Cc1cccc2nccnc12                                 |   | 0 |
| [O-][N+](=O)c1cccc(c1)C(=O)\N=C\2/S             | 1 |   |
| COc1c(cc(cc1[N+](=O)[O-])[N+](=O)[O-            | 1 |   |
| CCCCSP(=O)(SCCCC)SCCCC                          |   | 0 |
| CCOCCOC(=O)c1cc(Cc2ccc(N)c(c2)C(=O)             | 0 |   |
| CC(C)(O)c1ccccc1CC[C@H](SCC2(CC(=O)[O-])CC2)c   |   | 1 |
| C1COc1                                          | 1 | 0 |
| CNc1ccc(cc1)C(=C2C=CC(=[N+](C)C)C=C             | 1 |   |
| CN(Cc1cnc2nc(N)nc(N)c2n1)c3ccc(cc3)C            | 0 |   |
| CN(C)CCN(Cc1ccc(Cl)s1)c2ccccc2                  | 0 |   |
| COc1ccc2C(=O)c3c(O)c(OC)cc4ccnc(c2c             | 1 |   |
| Cc1ccc(C)c(c1)S(=O)(=O)O                        |   | 0 |
| CCN(CC)[N+](=NO)[O-]                            | 1 |   |
| CN[C@H]1[C                                      | 0 | 0 |
| C1CCN2CCCN=C2CC1                                |   | 0 |
| Cc1ccc(CN2C3C2c4ccccc4c5ccccc35)cc1             | 1 |   |
| COCC(O)Cn1cc(nc1Cl)N(=O)=O                      | 1 |   |
| CC1(COc2ccc(CC3SC(=O)N                          | 0 | 1 |
| CNC(=O)Oc1ccccc1C(C)C                           |   | 0 |
| CC(C)NC[C@                                      | 0 | 0 |
| Cc1ccc2[nH]nnc2c1                               | 0 |   |
| Cc1cccc2c1cc(C)c3c4C5OC5C(O)C(O)c4c             | 1 |   |
| CC[C@H]1OC                                      | 0 | 1 |
| CC(C)Oc1ccc                                     | 1 | 0 |
| [O-][N+](=O)c1ccc2Oc3cc(Cl)c(Cl)cc3Oc           | 1 |   |
| COc1ccccc1N2CCN(C[C@@                           | 0 |   |
| CCCCCCCCCCCCCCCC(=O)O                           |   | 0 |
| OCC12OOC1(CO)c3ccccc3O2                         | 0 |   |
| Oc1ccc(\C=N\c2snc3c(Cl)cc(Cl)cc23)cc1           | 1 |   |
| CC1OC(=O)C(C)OC1=O                              |   | 0 |
| CS(=O)(=O)Nc1ccc(Nc2c3ccccc3nc4ccc              | 1 |   |
| CC(=O)c1cccn1N(=O)=O                            | 1 |   |
| ClC1CC2C(C1Cl)C3(Cl)C(=C(Cl)C2(Cl)C3(Cl)Cl)Cl   |   | 1 |
| CC1(Cn2ccnn2)C(N3C(CC3=O)S1(=O)=O)              | 0 |   |
| CCCN1C(=O)N(CCCOC(=O)                           | 0 |   |
| On1nnc2ccccc12                                  | 0 | 0 |
| Cc1c(ccc(c1C2=NOCC2)S(=O)(=O)C)C(=O)c3cnn(C)c3C |   | 0 |
| BrCc1ccccc1CBr                                  | 0 |   |
| OCS(=O)(=O)[O-]                                 |   | 0 |
| CC(C)(C)NCC(O)c1ccc(O)c(NC(=O)N)c1              | 0 |   |
| Nc1ccc2nc3ccc(N)cc3[s+]c2c1                     | 1 |   |

|                                                             |   |   |
|-------------------------------------------------------------|---|---|
| CC(=O)OC(C=C)c1ccc2OCOC2c1                                  | 1 |   |
| C=Cc1ccc(C=C)cc1                                            |   | 0 |
| C[C@H]1CC(=O)O1                                             | 1 |   |
| C\C=C\C1=CC2=C(C(=O)O1)C(=O)C(O)C(                          | 0 |   |
| Cc1ccc(NC(=O)N)cc1                                          | 0 | 0 |
| CCC(O)CN                                                    | 0 |   |
| CN\C(=N/C)\NCc1ccccc1                                       |   | 0 |
| C[n+]1c2ccccc2nc3ccccc13                                    | 1 |   |
| OCl(=O)=O                                                   | 0 |   |
| Clc1ccc2nc(NC(=O)Cc3ccccc3)cc2                              | 0 |   |
| CCCC(=O)O                                                   | 0 | 0 |
| Cc1cc(C)c(C=C2C(=O)Nc3ccccc23)[nH]1                         |   | 1 |
| O=N(=O)c1ccc2c(oc3ccccc23)c1                                | 1 |   |
| O=NN1CCC[C@@H]1c2cccnc2                                     | 1 |   |
| Cn1c(N)nc2ncc(cc12)c3ccccc3                                 | 1 |   |
| CC(=CCCC(C)(OC(=O)C)C=C)C                                   |   | 0 |
| Nc1ccc2C(=O)C1=O                                            | 1 | 0 |
| CCCCCCCCCO[C@@H]1O[C@H](CO)[C@@H](O)[C@H](O)1               |   | 0 |
| COc1nsc2cc(ccc12)N(=O)=O                                    | 1 |   |
| Cc1cnc(C)c(C)n1                                             | 0 | 0 |
| BrC(=C)C=O                                                  | 1 |   |
| CCCCCCCCCCCCCCCCn1cc[n+](C)c1                               |   | 1 |
| C1Cc2ccc3c(ccc4ccccc34)c2C1                                 | 0 |   |
| CC(C)CC(=O)Nc1snc2ccc(Cl)cc12                               | 0 |   |
| CN(C)C#N                                                    | 0 |   |
| CCCCOC(=O)N[S+](=O)([O-])C1=O                               | 0 |   |
| CC(=C)C(=O)OCC(O)COc1ccc(cc1)C(C)(C)                        | 0 | 1 |
| NC(=O)C1CO1                                                 | 1 |   |
| O=C1C=CC(=O)C1=O                                            | 0 | 0 |
| OC(=O)C1C2CCC(O2)C1C(=O)O                                   |   | 0 |
| CN(C(=O)C)c1c(I)c(NC(=O)C)c(I)c(C(=O)[O-])c1I               |   | 0 |
| C1C[n+]2ccccc2c3cccc[n+]13                                  | 0 | 0 |
| CCCCC(CC)COC(=O)CCCCCCCC(=O)OCC(CC)CCCC                     |   | 0 |
| CCCCCCCCCN                                                  |   | 0 |
| Fc1ccnc2ccccc12                                             | 1 |   |
| [O-][N+](=O)c1ccc2c3ccccc3cc(c2c1)[N-]                      | 1 |   |
| N\C(=C/C#N                                                  | 0 | 0 |
| Cc1cc2ncccc2c3ncn(C)c13                                     | 0 |   |
| CN(C)CCNC(=O)c1cccc2ncc(nc12)c3ccccc3                       | 1 |   |
| CCCCn1cc[n+](C)c1C                                          |   | 0 |
| Clc1ccc2NC(=O)CSC(c3ccccc3)C1=O                             | 1 |   |
| C[N+](C)(CCCCC[N+](C)(C)C1c2ccccc2c3ccccc13)C4c1ccc(C)O)C#N |   | 0 |
| CCC(C)(O)C#N                                                | 0 | 0 |

|                                                |   |   |   |
|------------------------------------------------|---|---|---|
| N[C@@H](C1C(C1C(=O)O)                          | 0 |   |   |
| O[C@@H]1CC(=C[C@@H]                            | 0 |   |   |
| CC12C3CCC(C                                    | 0 | 0 |   |
| CC(CCN(C(=O)O)CCOC(=O)C(=C)C)CC(C)(C           |   | 0 |   |
| CC1(C)CCC=C2C(C)(C)[C@H]3CC[C@@]12C3           |   |   | 0 |
| Oc1ccc2c3C(C4OC4C(=O)c13)C5(O)CCC(             |   | 1 |   |
| ClC(Cl)Br                                      |   | 1 | 0 |
| CSc1ccc(cc1)C(=O)C(C)(C)N2CCOCC2               |   |   | 0 |
| SCCc1cnccn1                                    |   | 0 | 0 |
| CCCCN1C2CC                                     | 1 |   |   |
| CCC[N+](=O)[O-]                                |   | 0 |   |
| CCN(CC)C(=O                                    | 0 | 0 |   |
| C[N@+]1([O-                                    | 0 | 0 |   |
| COc1ccc(NC(=O)CC(=O)C)cc1                      |   |   | 0 |
| OC(=O)c1oc(c(c2cccc2)c1c3cccc3)N(=             |   | 1 |   |
| NCCC(=O)N[C@@H](Cc1c                           | 0 |   |   |
| Cn1nnnc1SCC2=C(N3[C@H](SC2)[C@H](NC(=O)[C@H-   |   |   | 0 |
| CCOC(=O)c1ccc(cc1)N(C)C                        |   |   | 0 |
| Nc1cccc1C(=O)OCC=C                             |   | 0 | 0 |
| CC[C@H](\C=C\[C@@H](C                          | 0 |   |   |
| CCCCC=C                                        |   | 0 | 0 |
| CCC(CO)(COCC=C)COCC=C                          |   |   | 0 |
| CN1C(=O)N(                                     | 0 | 0 | 0 |
| Clc1nsc2c(cccc12)N(=O)=O                       |   | 1 |   |
| Cc1c2C3NC3c4cccc4c2cc5cccc15                   |   | 1 |   |
| CCCCCCCCOC(=O)c1ccc(O)cc1                      |   |   | 1 |
| CNC(=O)C(C)SCCSP(=O)(OC)OC                     |   | 1 |   |
| CCC[C@@H]:                                     | 0 | 0 |   |
| Cc1cc(C)n(n1)c2[nH]nc(NN)c3c4cccc4n            |   | 0 |   |
| CC(CCl)OC(C)CCl                                |   | 1 | 0 |
| CC1=CCC(CC1                                    | 0 | 0 | 0 |
| CN(C)C(=O)N(C)C=O                              |   | 1 |   |
| CC(=C)C(=O)[O-]                                |   |   | 0 |
| COc1ccc(N)cc1                                  |   | 1 | 0 |
| Oc1ccc(Nc2ccc(cc2N(=O)=O)N(=O)=O)c             |   | 1 |   |
| OC[C@H]1O[C@H]([C@H]                           | 0 |   |   |
| CCCCCCCCc1ccc(cc1)S(=O)(=O)[O-]                |   |   | 0 |
| CC(C)CCCC(C)C1CCC2C3CC(O)C4(O)CC(O             |   | 1 |   |
| OC[C@H]1O[C@H](O[C@]2(CCl)O[C@H](CCl)[C@@H-    |   |   | 0 |
| CCCCC(CC)C(=O)[O-]                             |   |   | 0 |
| Cc1cccc2c1cc(C)c3c4cccc4ccc23                  |   | 1 |   |
| COC1OC(CO)C(OC2OC(C(O                          |   | 0 |   |
| Cc1cc2CCN(C(=O)Nc3ccc(Oc4ccnc4C)nc3)c2cc1C(F)( |   |   | 1 |

|                                             |   |   |
|---------------------------------------------|---|---|
| CCCCOCCOCCOC(=O)C                           |   | 0 |
| NC1=NC(=O)N(C=C1)[C@H]2O[C@@H]              | 0 |   |
| CC(COC(=O)c1ccccc1)(COC(=O)c2ccccc2         | 0 |   |
| CN(C)S(=O)(=O)n1c(nc(Cl)c1c2ccc(C)cc2)C#N   |   | 1 |
| CC1CC2C(CC[                                 | 0 | 0 |
| Clc1ccc(cc1)S(=O)(=O)c2ccc(Cl)cc2           | 0 | 1 |
| CC\C=C/CCOC(=O)\C(=C\C)\C                   |   | 0 |
| Cc1ccccc1N(=O)=O                            |   | 0 |
| Cl\C=C(\Cl)/SCc1ccccc1                      | 1 |   |
| CC1=C(Cl)C(=O)Oc2cc(OP(                     | 0 | 0 |
| NC1CCN(CC1                                  | 0 | 0 |
| CS(=O)(=O)c:                                | 0 |   |
| Fc1ccc2c3c(ccc2c1)c4cccc5cccc3c45           | 1 |   |
| CC[C@]1(O)C[C@@H]2CN(Cc3c([nH]c4ccccc34)[C@ |   | 1 |
| OC(=O)\C=C\C=C\C(=O)O                       | 0 |   |
| COC(C)CCO                                   | 0 |   |
| CCC(CC)C(C)CCOC(=O)C                        |   | 0 |
| CN1CCc2cc(C                                 | 1 |   |
| CCN(N=O)C(=N)NN(=O)=O                       | 1 |   |
| [O-][N+](=O)                                | 0 | 0 |
| [O-][N+](=O)c1cc(c(c2ccccc2)c(c1)[N+](      | 1 |   |
| O=N(=O)c1ccc(cc1)[N+]#N                     | 1 |   |
| O[C@H]1CO[C@@H]2[C@@H](CO[C@H]12)ON(=O):    |   | 0 |
| lc1ccc(cc1)C(=O)NC2CCN(                     | 0 |   |
| CN(Cc1cccc(Br)c1)N=O                        | 1 |   |
| CCOC(=O)[C@H](CCc1ccccc1)N[C@H]2CS[C@@H](CN |   | 0 |
| OC1\C=C\C(=O)O)\CCCC2,                      | 0 |   |
| COC1(CCCC1)OC2CCC3C4CCC5CC6SC6CC            | 0 |   |
| OC(=O)CCC(=                                 | 0 | 0 |
| Cc1ccc2nc3c4C=CC(O)C(O)c4ccc3c(CO)c         | 1 |   |
| [O-][N+](=O)c1cccc(CBr)c1                   | 0 |   |
| CCC(N)(CO)CO                                |   | 0 |
| CC(C)(O)C1Cc2cc3C=C(C(=O)Oc3cc2O1)(         | 1 |   |
| CN(C)CCCNCCC#N                              |   | 0 |
| OC(=O)C1=C(                                 | 0 |   |
| CCc1ccccc1NC(=O)c2csc(c2)[N+](=O)[O-        | 1 |   |
| CSc1ccc(cc1N(=O)=O)N(=O)=O                  | 1 |   |
| C(N1CCC2(CC                                 | 1 | 1 |
| COc1ccc(cc1)c2nc(sc2c3cc                    | 1 |   |
| C1OC1c2c3ccccc3cc4c2ccc5ccccc45             | 1 |   |
| Oc1ccc(CCNc2ccc(NCCc3cc                     | 0 |   |
| OC(=O)CCCc1                                 | 0 | 0 |
| OC(=O)c1cc(O)c2ccc(Cl)cc:                   | 0 |   |

|                                                |   |   |
|------------------------------------------------|---|---|
| CCCC(=O)c1c2cccc(O)c2c(O)c3c(O)cccc1           | 1 |   |
| [O-][N+](=O)c1ccc(\C=C\c2cccc(c2)C#N           | 1 |   |
| ClC(=C(Cl)\C(=C(/Cl)\SCc1cccc1)\Cl)Cl          | 1 |   |
| CC1(C)CO[C@                                    | 0 | 0 |
| COc1ccc(N)c2C(=O)c3cccc3C(=O)c12               | 1 |   |
| NC(CSC(=CCl)Cl)C(=O)O                          | 1 |   |
| N[C@H](CO)Cc1c[nH]cn1                          | 0 |   |
| [O-]Cl(=O)(=O)=O                               | 0 |   |
| CCCCCCCCC                                      | 0 | 0 |
| CC(=O)Nc1c(l)c(NC(=O)C)c(l)c(C(=O)[O-])c1l     |   | 0 |
| C[C@@H](O)CO                                   | 0 |   |
| CCOC(=O)C1=C(C)NC(=C(C                         | 0 |   |
| CCCCCCCCC(=O)O                                 | 0 | 0 |
| OCC(O)C(N=N#N)c1cccc1                          | 1 |   |
| COC(=O)C12Oc3ccc(c(O)c3C(=C1C(=O)C             | 0 |   |
| ClC(=C)C=C                                     | 0 |   |
| CC(C)\N=C\1                                    | 1 | 0 |
| CN(CS(=O)(=O)O)C1=C(C)N(C)N(C1=O)c             | 1 |   |
| C1CCc2c(C1)c3cccc4CNCCr                        | 1 |   |
| C=CC(=O)OCCCCOC(=O)C=C                         | 0 |   |
| OCCNc1nc(nc2cccc12)c3ccc(s3)[N+](=C            | 1 |   |
| CNCC(=O)N[C@@H](CCCNC(=N)N)C(=O)N[C@@H](C      |   | 0 |
| CC(=O)c1ccc(cc1)C(=O)C                         |   | 0 |
| N\C(=C(\N)/C#N)\C#N                            | 0 |   |
| [O-][N+](=O)c1ccc2c(c1)sc3cccc23               | 1 |   |
| [S-]C#N                                        |   | 0 |
| COc1ccc2nc3cc(Cl)ccc3c(NC(C)CCCN(CCC           | 1 |   |
| CC12CCC3C(C                                    | 0 | 0 |
| Nc1nc(N)nc(n1)c2oc(cc2)[N+](=O)[O-]            | 1 |   |
| C1CCC2(CCCCO2)OC1                              |   | 0 |
| [O-][N+](=O)c1cccc2c(cccc12)[N+](=O)           | 1 |   |
| Nc1cc(C(=C(Cl)Cl)Cl)c(cc1[                     | 0 |   |
| CC(\C=C\C(O)C1CC1)C2CCC3\C(=C\C=C\C            | 0 |   |
| C(Oc1ccc(Cc2cccc2)cc1)C3CO3                    | 1 |   |
| CCCN(C\C=C\l)C1CCc2ccc(                        | 0 |   |
| CNC(=O)c1cccc1Sc2ccc3c(\C=C\c4ccccn4)n[nH]c3c2 |   | 1 |
| COC(=O)[C@@H]1[C@@H                            | 0 | 0 |
| Fc1ccc(cc1)[                                   | 1 | 0 |
| Nc1ccc2ccc3ccc(c4ccc1c2c34)N(=O)=O             | 1 |   |
| OCc1cc2c3cccc3c4cccc(c1)c24                    | 0 |   |
| Oc1cccc2cccc12                                 | 0 | 1 |
| C1=Cc2c3ccc4cccc5ccc(c6cccc1c26)c3c4           | 1 |   |
| COc1ccc2nccc(C(OC(=O)C(C)O)C3CC4CC             | 0 |   |



|                                             |   |   |   |
|---------------------------------------------|---|---|---|
| CCCC(=O)C(=O)C                              |   |   | 0 |
| O=N(=O)c1ccc(Nc2ccc(cc2)N=C=S)cc1           | 0 |   |   |
| [O-]S(=O)(=O)CCS                            |   |   | 0 |
| C(Oc1nsc2ccccc12)C3CO3                      | 1 |   |   |
| CC(O)C(C)[N+](=O)[O-]                       | 0 |   |   |
| CCOC(=O)c1[nH]c2ccccc2c1\N=C\c3ccc(         | 1 |   |   |
| C[C@]12CC[C@@H]3[C@@H](CCc4cc(C             | 0 |   |   |
| COc1cc(ccc1[N+](=O)[O-])N=Nc2ccccc2         | 1 |   |   |
| NC1=CC(=O)N=C(N)N1                          |   |   | 0 |
| COc1ccc(N[S+](=O)([O-])c                    | 0 |   |   |
| COc1ccc(\C=                                 | 0 | 0 |   |
| CC(C)[C@H]1[C@@H]2C[C                       | 0 |   |   |
| CC(=O)c1cc(NC(=O)N)ccc1OC[C@H](O)(          | 1 |   |   |
| O=C(Nc1cccc                                 | 0 |   | 0 |
| CP(=O)(O)CC                                 | 0 | 0 |   |
| CN(C)CCCN=C1c2ccccc2Nc3c(F)ccc(c13)         | 1 |   |   |
| Fc1ccccc1                                   | 1 |   |   |
| CC(C)(C)c1ccc                               | 1 | 1 |   |
| C(Oc1ccccc1)C2CO2                           | 1 |   |   |
| NC1C2CN(CC                                  | 0 | 0 |   |
| C[C@@H]1O                                   | 0 | 1 |   |
| O[N+](=CCl)[O-]                             | 1 |   |   |
| NC(COC(=O)C=N#N)C(=O)O                      | 1 |   |   |
| CC1=C(N2[C(                                 | 0 | 0 |   |
| C(N1C2C1c3ccccc3c4ccccc24)c5ccccc5          | 1 |   |   |
| Cc1c(cc2c(c1[N+](=O)[O-])C(C)(C)CC2(C       | 0 |   |   |
| Nc1cc2cccc3ccc4cccc1c4c23                   | 1 |   |   |
| NC(Cc1ccc(O)c(O)c1)C(=O)O                   | 1 |   |   |
| CN(C)C(=O)N(C)N=O                           | 1 |   |   |
| CC(C)(C)OC(=O)O\N=C(/C#N)\c1ccccc1          | 0 |   |   |
| COP(=O)(OC)                                 | 0 | 0 | 0 |
| CN(N)C=O                                    | 0 |   |   |
| CN(N=O)C(=O)c1ccccc1                        | 1 |   |   |
| C[C@]12CC[C@H]3[C@@H](CCc4cc(OC(=O)N(CCCl)C | 0 |   |   |
| Nc1ccc(Oc2ccc(Oc3ccc(N)cc3)cc2)cc1          | 1 |   |   |
| CCC=N(=O)O                                  | 0 |   |   |
| CC(=O)N1C[C@H](O)C[C@H]1C(=O)O              |   |   | 0 |
| C[C@H]1CO1                                  | 1 |   |   |
| CC(C)c1nc(nc(c2ccc(F)cc2)                   | 0 |   |   |
| Cc1cc2cc3ccccc3c4ccc5cccc1c5c24             | 1 |   |   |
| COCCOC(=O)C=C                               | 0 |   |   |
| CCS                                         | 0 |   |   |
| CCOC(=O)C12CC1\C(=N/O                       | 0 |   |   |

|                                                                              |   |   |   |
|------------------------------------------------------------------------------|---|---|---|
| <chem>Cc1ccc(C)cc1</chem>                                                    | 0 | 0 |   |
| <chem>CN(C)C(=O)Nc1ccc(Oc2ccc(Cl)cc2)cc1</chem>                              |   |   | 1 |
| <chem>O[C@@H]1CC(=C[C@@H](O)[C@@H]1O)</chem>                                 | 0 |   |   |
| <chem>O=P(Oc1ccccc1)(Oc2ccccc2)Oc3ccccc3</chem>                              | 0 |   | 1 |
| <chem>C[C@@H]1C[C@@H](O)C1</chem>                                            | 0 | 0 | 1 |
| <chem>COc1ccc(cc1)</chem>                                                    | 0 | 0 |   |
| <chem>Nc1c(Br)cc(cc1[N+](=O)[O-])[N+](=O)[O-]</chem>                         | 1 |   |   |
| <chem>[O-][N+](=O)c1oc(\C=N\N2C(=O)C=C(C)C1(CCC(C)C)C(=O)NC(=O)NC1=O)</chem> | 1 |   |   |
| <chem>O=C(OCCN1CCOCC1)C2(CC)C(C)C(N)C1CCC(C)(N)CC1</chem>                    | 0 |   | 0 |
| <chem>CN([C@@H](CN1CCCC1)c2cc)C1</chem>                                      | 0 |   |   |
| <chem>CCOc1ccc(cc1)N=O</chem>                                                | 1 |   |   |
| <chem>S=P(N1CC1)C1</chem>                                                    | 0 | 0 | 1 |
| <chem>ClC1(Cl)C2(Cl)C3(Cl)C4(Cl)C(Cl)(Cl)C5(Cl)C1</chem>                     | 0 |   | 0 |
| <chem>[O-]S(=O)(=O)OOS(=O)(=O)[O-]</chem>                                    |   |   | 0 |
| <chem>O=C1c2ccccc2c3ccc4C(=O)c5ccccc5c6cc1</chem>                            | 0 |   |   |
| <chem>OC(=Nc1ccc(cc1Cl)N(=O)=O)c2cc(Cl)ccc2</chem>                           | 1 |   |   |
| <chem>CCCCCCCCC(=O)O</chem>                                                  |   |   | 0 |
| <chem>O=N(=O)c1ccc2ccc3cccc4c5ccccc5c1c2c</chem>                             | 1 |   |   |
| <chem>OC(=O)CCCC1SCC2NC(=O)NC12</chem>                                       | 0 |   |   |
| <chem>Nc1nc(N)c(N)c(N)n1</chem>                                              |   |   | 1 |
| <chem>CCC(C)C(C)CO</chem>                                                    | 0 |   |   |
| <chem>CC(=O)C=Cc1ccccc1</chem>                                               |   |   | 0 |
| <chem>C[C@@H](O)COC[C@@H](C)O</chem>                                         | 0 |   |   |
| <chem>[O-][N+](=O)c1ccc2C(=O)NSc2c1</chem>                                   | 1 |   |   |
| <chem>CCOC(=O)C1=C(O)C(=O)N(C)C1</chem>                                      | 0 |   |   |
| <chem>CCN(CC(O)C1=CC(=O)C(=N#N)C=C1)N=C1</chem>                              | 1 |   |   |
| <chem>OCc1cc2ccc3ccnc3c2[nH]1</chem>                                         | 0 |   |   |
| <chem>OC(=O)c1nc(Cl)c(Cl)c(Cl)c1Cl</chem>                                    |   |   | 0 |
| <chem>COc1cc(ccc1)C1</chem>                                                  | 0 | 0 |   |
| <chem>C[n+]1c2ccccc2cc3ccc(N)cc13</chem>                                     | 1 |   |   |
| <chem>ClCC(=O)Cl</chem>                                                      |   |   | 0 |
| <chem>CS(=O)(=O)C</chem>                                                     | 0 |   | 1 |
| <chem>CC(C)CCC[C@@H](O)C</chem>                                              | 0 | 0 |   |
| <chem>CCN=NO</chem>                                                          | 1 |   |   |
| <chem>CC(C)(CCl)c1ccccc1</chem>                                              |   |   | 0 |
| <chem>Cc1c2ccncc2c(C)c3c4cc(N)ccc4[nH]c13</chem>                             | 1 |   |   |
| <chem>CN1CCc2cc3OCOc3cc2C1O</chem>                                           |   |   | 0 |
| <chem>OC(=O)C(Cl)(Cl)Br</chem>                                               |   |   | 0 |
| <chem>O=C1NS(=O)C1</chem>                                                    | 0 |   | 0 |
| <chem>O=C(C1CCCC1)C1</chem>                                                  | 0 | 0 |   |
| <chem>COC(=O)OC</chem>                                                       |   |   | 0 |

|                                                   |   |   |
|---------------------------------------------------|---|---|
| CC(O)COC(=O)C(=C)C                                | 0 | 0 |
| COC(=O)C(=CC)C=C(C)C=C(C)C=CC=C(C)C               | 1 |   |
| [O-][N+](=O)c1ccc(s1)[C@@H]2NC(=O)                | 1 |   |
| NC(=S(=O)=O)N                                     | 1 |   |
| CC(=O)C=CC1=C(C)CCCC1(C)C                         |   | 0 |
| CC(C)C(=O)OCCc1ccccc1                             |   | 0 |
| O=C1CCc2c(O1)ccc3ccccc2                           | 0 |   |
| CC(=C)C(=O)OC[C@H](Br)CBr                         | 1 |   |
| CO[C@@H]1C[C@H](C[C@@H](C)[C@@H]2CC(=O)[C@H]2O)C1 |   | 1 |
| Oc1ccc(c2C(=O)c3c(C(=O)c12)c(O)ccc3)cc1           | 1 |   |
| NCCNC(=O)c1ncsc1c2cccc2                           | 0 |   |
| Oc1cc2C(CN(C)C)cc2                                | 1 | 0 |
| N[C@H](CCCN(N=O)C(=O)N)C(=O)O                     | 1 |   |
| CN1C2CCC1C                                        | 1 |   |
| NC(=O)N(c1ccccc1)c2ccccc2                         | 0 |   |
| CCC(C)C(=O)O[C@H]1C[C@H](O)C1                     | 0 |   |
| Oc1cc(O)c2C(=O)C(=O)C(Oc2c1)c3ccc(C)cc3           | 1 |   |
| FC[C@H]1CO1                                       | 1 |   |
| COc1cc(C(O)c2ncc([N+](=O)[O-])n2C)c(O)cc1         | 1 |   |
| CC1=C(C)S(=O)(=O)CCS1(=O)=O                       |   | 0 |
| NCCCC1CCCC1                                       | 0 | 0 |
| CN(=O)=O                                          |   | 0 |
| O[C@H]1CO[C@H]([C@H](O)[C@@H]1)C                  | 1 |   |
| Cc1nc2ccc(N)cc2nc1C                               | 1 |   |
| CCCN1C(=O)C(=Cn2nc(N)n)C1                         | 0 |   |
| OC(=O)C(c1ccc(Cl)cc1)c2ccc(Cl)cc2                 |   | 0 |
| C1CCN(CC1)C                                       | 0 | 0 |
| CC1=C(C)C(=O)C1                                   | 0 | 0 |
| OC(CN=N#N)CN=N#N                                  | 1 |   |
| OC(=Nc1ccccc1)c2csc(c2)N(=O)=O                    | 1 |   |
| CC(C)COC(=O)c1ccccc1O                             |   | 0 |
| COc1cc2[nH]c(C)c(CCN3CCN(CC3)c4ccccc4)c2cc1OC     |   | 0 |
| CCCCCCCCNC                                        |   | 0 |
| NC(=O)c1ccc(cc1)[N+](=O)[O-]                      | 1 |   |
| COc1cc2c(CC)cc2                                   | 0 | 0 |
| C[N+](C)(CCCCC[N+](C)(C)C)C                       | 0 |   |
| Cc1cc(O)c(Cn)cc1                                  | 0 | 0 |
| Cc1cc(O)c2C(=O)c3c(O)cc(O)c(O)c3C(=O)C1           | 1 |   |
| C[N+](C)1=CC=C(CC1)c2ccccc2                       | 1 |   |
| OS(=O)(=O)c1ccc(NN=Nc2ccc(cc2)S(=O)(=O)C)cc1      | 0 |   |
| NCC(CP(=O)(O)C)C                                  | 0 | 0 |
| OC(=O)c1ccc(O)cc1                                 | 0 | 0 |
| FC(F)(F)C(=O)CC(=O)c1ccccc1                       |   | 1 |

|                                            |   |   |   |
|--------------------------------------------|---|---|---|
| COc1cc(C=C)ccc1O                           | 0 |   |   |
| CN1C(=O)c2ccccc2C1=O                       |   |   | 0 |
| Cc1cccc(c1)[N+](=O)[O-]                    | 0 |   |   |
| CC1(CO1)c2ccc(cc2)N(=O)=O                  | 1 |   |   |
| COc1ccc(cc1(                               | 0 | 0 |   |
| FC(F)(F)c1cc(NC(=O)Nc2ccc(Cl)cc2)ccc1Cl    |   |   | 1 |
| C=CCCCCCCC=C                               |   |   | 0 |
| NC1(CC1)C(=O)O                             |   | 0 |   |
| CC1OC(Oc2cc(O)c3C(=O)c4c(O)cc(C)cc4        | 1 |   |   |
| Oc1ccc(Oc2ccccc2)cc1                       |   |   | 1 |
| CCC#C[C@@H](C)[C@@]1(CC=C)C(=O)F           | 0 |   |   |
| CNCC(=O)NC                                 | 0 | 0 |   |
| Oc1c(cc(cc1[                               | 0 | 0 |   |
| OCCCCCCCCCCCCCCCCC(=O)O                    | 0 |   |   |
| C[C@@H]1[C                                 | 0 | 0 |   |
| Nc1ccc2c3cccc4cccc(c2c1)c34                | 1 |   |   |
| CN\C(=N\C#                                 | 0 | 0 |   |
| O[C@@H]1OCC=C2OC(=O)C=C12                  | 0 |   |   |
| COc1cc2OC3OC=CC3c2c4OC(=O)C5=C(C           | 1 |   |   |
| Cc1cc(N)c2cc                               | 0 |   | 0 |
| CCCCOCCOC                                  | 0 | 0 | 0 |
| COc1ccc2[C@                                | 0 | 0 | 0 |
| CCCCCCCC\C=C/CCCCCCCC(                     |   | 0 |   |
| COc1cc2nc(nc(N)c2cc1OC)                    |   | 0 |   |
| CCCCC                                      | 0 |   | 0 |
| CCN(CCCC(=O)O)N=O                          | 1 |   |   |
| [O-][N+](=O)c1cccc2c3ccc(c4cccc(c12)c      | 1 |   |   |
| [O-][N+](=O)c1cc(c2[nH]c3cnc(cc3c2c1)      | 1 |   |   |
| CC(=O)[C@@]1(O)CC[C@H]2[C@@H]3CCC4=CC(=O)( |   |   | 0 |
| O=N(=O)c1ccc2ccc3ccc(c4ccc1c2c34)N(        | 1 |   |   |
| [O-][N+](=O)c1ccc(cc1)n2nc(n[n+])2c3cc     | 0 |   |   |
| Clc1c2ccccc2cc3c1ccc4ccccc34               | 1 |   |   |
| N[C@@H](C                                  | 0 | 0 | 0 |
| [O-][N+](=O)c1ccccc1C=O                    | 1 |   |   |
| N#CSCSC#N                                  | 0 |   |   |
| COc1ccc2C(OC(=O)c2c1OC)C3N(C)CCc4c         | 0 |   |   |
| CC1c2ccccc2c3cccc(C)c13                    | 1 |   |   |
| COc1ccc(O)c2C(=O)c3c(OC)cc4OC5OCC(         | 0 |   |   |
| Cc1cccc2cc3c(ccc4ccccc34)cc12              | 1 |   |   |
| CN(C(=O)C)c:                               | 0 | 0 |   |
| Cc1cc2nc(C)c(C)nc2c3nc(N)n(C)c13           | 1 |   |   |
| COc1cc(cc(OC)c1O)C2C3C(                    |   | 0 |   |
| Cc1cc(N)c(C)c2c3cc(O)ccc3[nH]c12           | 1 |   |   |

|                                                |   |   |
|------------------------------------------------|---|---|
| Clc1ccccc1                                     | 0 | 0 |
| [O-]C(=O)c1cccc(c1)N(=O)=O                     |   | 0 |
| CCN(N=O)C(=N)N[N+](=O)[O-]                     | 1 |   |
| ClCC(=O)[C@H](Cc1ccccc1                        | 0 |   |
| N[C@@H](C                                      | 0 | 0 |
| OCC(O)C(O)C(O)C(O)C(=O)O                       | 0 |   |
| CCCCC\C=C/CCC=O                                |   | 0 |
| CCC(=O)N([C@H]1CCN(CCC2CCCC2)C[C@@H]1C)c3cc    |   | 0 |
| CCCCc1nc(Cl)                                   | 0 | 0 |
| ClCc1ccc2ccc3cc4ccccc4c5ccc1c2c35              | 0 |   |
| CC(=C)C(=O)Nc1ccc(Cl)c(Cl)c1                   |   | 1 |
| O=N(=O)c1cccc2c3ccc(c4cccc(c12)c34)N           | 1 |   |
| CC(O)CN(C)c1ccc(NN)nn1                         | 1 |   |
| NC(=N)NC(=O                                    | 0 | 0 |
| Cn1c(N)nc2c3cccnc3ccc12                        | 1 | 0 |
| CC(C)(C)NC(=                                   | 0 | 0 |
| CC(=O)NC[C@H]1CN(C(=O)O1)c2ccc(N3CCOCC3)c(F)c  |   | 0 |
| OCNC(=O)c1ccc(Cl)cc1                           | 0 |   |
| COC(=O)c1oc(N(O)C(=O)C)c2cccc2)c:              | 0 |   |
| Oc1ccc2cccc2c1SSc3c(O)c                        | 0 |   |
| C[N+](C)(C)[C@                                 | 0 | 0 |
| Oc1ccc(c2cccnc12)S(=O)(=O)O                    | 1 | 0 |
| CO[C@@H]1                                      | 0 | 0 |
| O=C(OCC(COC(=O)c1cccnc1)(COC(=O)c2cccnc2)COC(= |   | 0 |
| CNc1ccc2nc(C)cnc2c1C                           | 1 |   |
| [O-][N+](=O)c1cccc(\C=C\C(=O)c2cccc:           | 0 |   |
| C1CC23OC2(C1)C=CC=C3                           | 1 |   |
| C[C@H]1C\C:                                    | 0 | 0 |
| Oc1ccc(Nc2cccc2)cc1                            |   | 1 |
| COc1ccc(COC(=O)C)cc1                           |   | 0 |
| Oc1cc(cc(O)c                                   | 1 | 0 |
| Oc1c(cc(cc1N(=O)=O)N(=O)=O)C2CCCC2             |   | 1 |
| CCC(C)(CC)c1cc(NC(=O)c2c(OC)cccc2OC)on1        |   | 1 |
| CCCCCCCCCCCCOS(=O)(=O)[O-]                     |   | 0 |
| C[C@@H](O)[C@@H]1[C@H]2SC(=C(N2C1=O)C(=O)C     |   | 0 |
| COC1CCC=CO1                                    |   | 0 |
| CCCCCCCCCCCC[C@H]1CO1                          | 0 |   |
| CCN(CC)CCNC(=O)c1ccc(N                         | 0 | 0 |
| N[S+](=O)([O-])c1cc2c(N                        | 0 |   |
| O=N(=O)c1ccc2c(ccc3cc(ccc23)N(=O)=C            | 1 |   |
| NCC[C@H](C                                     | 0 | 0 |
| CN(C)c1ccc(cc1)C2CC3(C)C(CCC3(O)C=C            | 0 |   |
| O=C1NC(=O)C2=C(NC(=O)N2)N1                     |   | 0 |

|                                                                                                                                                                                                                                  |   |   |   |
|----------------------------------------------------------------------------------------------------------------------------------------------------------------------------------------------------------------------------------|---|---|---|
| Oc1cc2CCCN(Cc2cc1O)C(=O)C(F)(F)F                                                                                                                                                                                                 | 0 | 0 | 0 |
| CC(CCC1ccc(C)N=C(O)C=Cc1oc(cc1)N(=O)=O                                                                                                                                                                                           | 1 | 0 | 0 |
| CN(C(=S)Oc1ccc2ccccc2c1)CC(C)CCNc1snc2ccccc12                                                                                                                                                                                    | 0 | 0 | 0 |
| ClNc1ccc2c(Cc3ccccc23)c1CCOC(=O)[C@H](CCc1cccCNCCc1c[nH]c(CCC(c2cccccNc1ccc2ccc3ccc(c4ccc1c2c34)[N+](=O)[CN(N=O)c1ccccc1)CC(C)c1ccc2CO[C@H](CBr)[C@H](O)[C@H](O)[C@@O-][N+](=O)c1ccc2ccc3c4c(ccc1c24)c5cClc1cccc(NN=C(C#N)C#N)c1 | 0 | 1 | 1 |
| C1OC1c2ccc(cc2)c3ccccc3                                                                                                                                                                                                          | 1 | 1 | 1 |
| CC(=O)Nc1ccc(cc1)C2OC2C(=O)c3ccccc3                                                                                                                                                                                              | 1 | 1 | 1 |
| COc1cc2OC3OC4OC4C3c2c5OC(=O)C6=C(O)C2C1c3c4ccccc4cc5c6ccccc6cc2c35                                                                                                                                                               | 1 | 1 | 1 |
| Cc1ccc2OC(=O)C=Cc2c1                                                                                                                                                                                                             | 0 | 0 | 0 |
| Cc1ccc(c(C)c1)[N+](=O)[O-]                                                                                                                                                                                                       | 1 | 1 | 1 |
| [O-][N+](=O)c1ccc(cc1)c2nc3SCCn3c2[NCOc1ncc(F)c2nc(nn12)S(=O)(=O)Nc3c(F)ccccc3F                                                                                                                                                  | 0 | 0 | 0 |
| CN1CCN(CC1)CN1C2CC(CC1C3OC23)OC(=O)C(CO)c4ccCON                                                                                                                                                                                  | 0 | 0 | 0 |
| CC1c2ccccc2c3ccc(F)cc13                                                                                                                                                                                                          | 1 | 1 | 1 |
| CC1=NN=C(C(=O)N1N)c2ccccc2                                                                                                                                                                                                       | 0 | 0 | 0 |
| OC(C(O)C(=O)O)C(=O)O                                                                                                                                                                                                             | 0 | 0 | 0 |
| NC(CCN=[N+]=[N-])C(=O)O                                                                                                                                                                                                          | 1 | 1 | 1 |
| COc1ccc(C[C@H](C)NC[C@H](O)c2ccc(O)c(NC=O)cO=C1c2ccc3ccccc3c2c4c1ccc5ccccc45                                                                                                                                                     | 1 | 1 | 1 |
| CC1(C)OC1COc2c3C=CC(=O)Oc3cc4occc1                                                                                                                                                                                               | 0 | 0 | 0 |
| CC(C)(C)OC(=O)C(N)CN=N#N                                                                                                                                                                                                         | 1 | 1 | 1 |
| [O-][S+](=O)(N1CCNCC1)c                                                                                                                                                                                                          | 0 | 0 | 0 |
| CNC(=O)Oc1cccc2OC(C)(C)Oc12                                                                                                                                                                                                      | 0 | 0 | 0 |
| CC1(C)C[C@H](C)CN(C)c1ccc(N)cc1                                                                                                                                                                                                  | 0 | 0 | 0 |
| Clc1cccc(C=Cc2ccc(cc2)N(=O)=O)c1                                                                                                                                                                                                 | 1 | 1 | 1 |
| CCCCC(=O)OC1(CCN(CCC(=O)OC1CCCCC1)c2ccccc2C(=O)OC3CCC                                                                                                                                                                            | 0 | 0 | 0 |
| COc1nc2ccccc(CBr)c2nc1OC                                                                                                                                                                                                         | 1 | 1 | 1 |

|                                                     |   |   |   |   |
|-----------------------------------------------------|---|---|---|---|
| Cc1ccccc1N2                                         | 0 |   |   |   |
| C[C@@H](CN(C)C)CN1c2c                               |   | 1 |   |   |
| CN=C1C=CC(=O)                                       | 1 | 0 | 0 | 1 |
| [O-][N+](=O)c1ccc(\C=C\C2CCCC2)cc1                  |   |   | 1 |   |
| COc1ccc(cc1)                                        | 0 | 0 |   |   |
| NCCCCCN                                             |   |   | 0 | 0 |
| CCCCC(CC)COC(=O)OOC(C)(C)C                          |   |   |   | 0 |
| O=N(=O)c1ccn(=O)c2ccccc12                           |   |   | 1 |   |
| CC1(C)COC1=O                                        |   |   | 1 |   |
| CC(CCCC(C)(C)O)C=C                                  |   |   |   | 0 |
| C[N+](=O)[O-]CCOCC1                                 |   |   |   | 0 |
| CCC(=N(=O)O)CO                                      |   |   | 0 |   |
| O=N(=O)c1cccc(c1)S(=O)(=O)OCC2CO2                   |   |   | 1 |   |
| CC12CCC(CC1O2)C=C                                   |   |   | 0 |   |
| Clc1ccc(cc1)\C(=C\C=C\C2CCCC2)\C#N                  |   |   | 1 |   |
| Cc1cc(ccc1N=Nc2ccnc2)N(CCO)CCO                      |   |   | 0 |   |
| C[C@H]1[C@H]2Cc3ccc(O)cc3[C@]1(C)CCN2CC=C(C)C       |   |   |   | 0 |
| Oc1ccc2ccccc2c1N=Nc3ccc(c4ccc(cc4S(=O)(=O)C)cc4)cc3 |   |   | 0 |   |
| CN1CCN(CC1)                                         | 1 | 1 |   |   |
| CCCCC(=O)\N=C\1/SN(C(=O)CCCC)c2c                    |   |   | 1 |   |
| Cc1ccc(cc1N)N=N(=O)c2ccc(C)c(N)c2                   |   |   | 1 |   |
| Oc1ccc2C(=O)c3c(O)ccc(O)c3C(=O)c2c1                 |   |   | 1 |   |
| Fc1ccc2ccnc2c1                                      |   |   | 1 |   |
| COc1ccc(Cl)cc1C(=O)NCCC(=O)O                        |   | 0 |   |   |
| CNC1C2CN3CCC(O2)C13                                 |   | 0 |   |   |
| CC1=CC(=O)c2c(O)cccc2C1                             |   | 0 | 1 |   |
| O=C1Oc2cccc3ccc4cccc1c4c23                          |   |   | 0 |   |
| Cc1ccccc1C(=O)Cl                                    |   |   | 1 |   |
| CC1(CN2CCC(=O)N2)C(=O)N1                            | 1 | 1 |   |   |
| N[S+](=O)([O-])c1cc(C(=O)N)ccc1                     |   | 0 |   |   |
| CN(CC[C@@H](O)c1ccc(cc1)C(=O)N)C(=O)O               |   | 0 |   |   |
| C(Oc1ccc(OCC2CO2)c1)C3CO3                           |   |   | 1 | 0 |
| COc1cc(C)ccc1O                                      |   |   |   | 0 |
| c1ccc2c(c1)[nH]c3ccccc23                            |   |   | 0 |   |
| Cc1ncc([N+](=O)[O-])n1C                             |   |   | 1 |   |
| CC1CC2OC(=O)C3(C)C2C(OC3(C)O)C4(C)C(=O)N4           |   |   | 0 |   |
| Oc1ccc(cc1[S+](=O)(O)[O-])C(=O)N1                   |   | 0 |   |   |
| Cc1csc(n1)c2nc3ccccc3n2C(=O)O                       |   | 0 |   |   |
| CC(=CC1C(C(=O)N)C(=O)N1)C(=O)O                      | 0 | 0 | 1 | 0 |
| CC12CCC3C(Cc4cc(O)ccc34)C1CC(O)C2(=O)O              |   |   | 0 |   |
| Cc1ccc(C=C2C3CCC(C2=O)C3(C)C)cc1                    |   |   |   | 1 |
| CCOC(=O)c1ccc(O)cc1                                 | 0 | 0 |   | 0 |
| Clc1ccc(Cl)c1                                       | 0 | 0 |   | 0 |

|                                             |   |   |   |
|---------------------------------------------|---|---|---|
| COP(=O)(OC)                                 | 0 | 1 | 0 |
| CCCCCCCCCCCCCCCCOS(=O)(=O)[O-]              |   |   | 0 |
| Fc1ccc(cc1)C                                | 1 | 0 | 0 |
| CC(C)c1cc2C                                 | 0 |   | 0 |
| CN(Cc1ccc(cc                                | 1 |   | 0 |
| Cn1c2ccc3ccccc3c2c4c5ccccc5ccc14            |   | 1 |   |
| CCOC(=O)C(C)(C#N)c1snc2ccc(cc12)[N+         |   | 1 |   |
| CC1(C)S[C@                                  | 0 | 0 |   |
| OP(=O)(O)OC(Cn1cncn1)(Cn2cncn2)c3ccc(F)cc3F |   |   | 0 |
| CCN1CCN(CC                                  | 0 | 0 | 1 |
| N[C@H](CCC(=O)NCC(=O)                       |   | 0 |   |
| CN1C(CC(O)C1=O)c2cccnc2                     |   | 0 |   |
| O=N(=O)c1ccc2nc[nH]c2c1                     |   | 1 | 1 |
| Cc1cc(CC(=O)                                | 0 | 0 |   |
| OC(=O)CCC(=O)Nc1cc(Cl)cc(Cl)c1              |   | 0 |   |
| NC(=O)NS(=                                  | 0 | 0 |   |
| CO\N=C/C(=O)NC1C2SCC(=C(N2C1=O)             |   | 0 |   |
| Cn1cc2cccc(c2n1)N(=O)=O                     |   | 1 |   |
| CC(C)(O\N=C/C(=O)N[C@                       |   | 0 |   |
| ClC\C=C/CCl                                 |   |   | 0 |
| COc1cccc2C(=O)c3c(O)c4CC(O)(CC(OC5          |   | 1 |   |
| CCCCCNC(=O)\C=C\c1oc(cc1)[N+](=O)[C         |   | 1 |   |
| CCN1CCC[C@H]1CNC(=O)c                       |   | 0 | 0 |
| FC(F)(F)c1ccccc1N(=O)=O                     |   | 0 | 0 |
| CC(=O)O[C@                                  | 0 | 0 | 0 |
| Cc1ccccc1N                                  |   | 1 | 0 |
| CCc1c(Br)c(Br)c(Br)c(Br)c1Br                |   | 0 |   |
| Oc1cc2cccc3ccc4ccc(c1c4c23)N(=O)=O          |   | 1 |   |
| CN(C)c1ccc(cc1)C2(OC(=O)c3cc(ccc23)N        |   | 0 | 1 |
| CC(C)(C)NCC(                                | 0 | 0 | 0 |
| CCC(C)COC(=O)CC(C)C                         |   |   | 0 |
| CC(=O)C1(C)OC12C(=O)C=Cc3ccccc23            |   | 0 |   |
| CCCCCCCCCCC[n+]1ccn(CCCCCCCCCC)c1C          |   |   | 1 |
| CCCC=C(CC)C=O                               |   |   | 0 |
| Cc1cccn2c1nc3ccc(NO)nc23                    |   | 1 |   |
| C1COCCOCCOCCOCCOCCO1                        |   | 0 |   |
| OC[C@H]1O[C@@H](Oc2                         |   | 0 |   |
| OC(=O)[C@H]1CN(CCCP(=                       |   | 0 |   |
| CC1(C)N(CO)C(=O)NC1=O                       |   |   | 0 |
| CCC(C)N1N=(                                 | 0 | 1 |   |
| COc1c(c(C)c(cc1C(C)(C)C)[N+](=O)[O-])       |   | 0 |   |
| C1COc2c(O1)                                 | 1 | 0 |   |
| CC(C)(C)C(=O)C(Cl)Cl                        |   |   | 0 |



|                                                  |   |   |   |
|--------------------------------------------------|---|---|---|
| OC(=O)Cc1cc                                      | 0 | 0 | 0 |
| CC(=O)OC1(CCC2C3C=C(Cl)C4=CC(=O)C5               |   |   | 0 |
| Clc1cncc(Cl)c1                                   |   |   | 0 |
| CCCC(=O)C1c2cccc(O)c2C(=O)c3c(O)ccc              |   |   | 1 |
| CCCCN(CC(O)CC)N=O                                |   |   | 1 |
| CN(CC#C)Cc1                                      | 0 | 0 | 0 |
| COP(=O)(OC)Oc1ccc(c(C)c1)N(=O)=O                 |   |   | 1 |
| Cc1ccc(cc1)N                                     | 1 | 0 | 0 |
| ONC(=O)c1ccccc1                                  |   |   | 1 |
| Oc1c(I)cc(cc1N(=O)=O)C#N                         |   |   | 0 |
| Oc1c(Sc2cc(Cl)cc(c2O)[N+](=O)[O-])cc1            |   |   | 0 |
| O[N+](=C=Cc1oc(cc1)[N+](=O)[O-])[O-]             |   |   | 1 |
| Cc1nc(N=Nc2                                      | 0 | 0 |   |
| CC(O)CO                                          | 0 | 0 | 0 |
| Cc1ccc(N)c(C)c1                                  |   |   | 1 |
| CC12C=CC3=C4CCC(=O)CC4=CCC3C1CCC                 |   |   | 0 |
| CC(C)CCCC(C)C1CCC2C3CC=C4CCCCC4(C)               |   |   | 0 |
| CC(=O)N(O)c1ccc(Oc2ccc(Cl)cc2Cl)cc1              |   |   | 1 |
| CC(C)(C)S(=O)(=O)CC(Cc1ccccc1)C(=O)N             |   |   | 0 |
| CC(C)NP(=O)                                      | 0 | 0 |   |
| CCCc1ccc2OCOc2c1                                 |   |   | 0 |
| OCCN(CCO)c1ccc(N=Nc2c(Cl)cc(cc2Cl))N             |   |   | 1 |
| C=COCC1CCC(COC=C)CC1                             |   |   | 0 |
| [O-]S(=O)CNc1ccc(cc1)S(=O)(=O)c2ccc(NCS(=O)[O-]) |   |   | 0 |
| OC[C@H]1O                                        | 0 |   |   |
| Oc1ccc(c2C(=O)c3c(C(=O)c12)c(O)ccc3N             |   |   | 1 |
| CCC(C)ON=O                                       |   |   | 1 |
| [O-][N+](=O)c1ccc2nc3ccc(cc3nc2c1)[N             |   |   | 1 |
| CS(=O)(=O)O                                      |   |   | 0 |
| COc1c(Cl)ccc(Cl)c1C(=O)O                         |   |   | 0 |
| CO\N=C/C(=O)N[C@H]1[C@H]2SCC(=C(N2C1=O)C(=       |   |   | 0 |
| CCCN(CCC)N=O                                     |   |   | 1 |
| CC1CN(CCN1)[S+](=O)([O-                          |   | 0 |   |
| CC(C)CC(NC(=O)C(Cc1ccccc1)NC(=O)CN(              |   |   | 0 |
| CC1CCC(=C(C)C)C(=O)C1                            |   |   | 0 |
| ClC(=O)c1ccccc1                                  |   |   | 1 |
| CC(=C)CN1CC[C@]23[C@H                            |   | 0 |   |
| Oc1cccc(c1N(=O)=O)N(=O)=O                        |   |   | 1 |
| [O-][N+](=O)c1cccc2c1c(cc3ccccc(c23)[N           |   |   | 1 |
| CCC(COC(=O)C(=C)C)(COC(=O)C(=C)C)CC              |   |   | 1 |
| CCCCCCCCN                                        |   |   | 0 |
| Oc1cccc2cccn(=O)c12                              |   |   | 0 |
| O=N(=O)OC1COC2C(COC12)ON(=O)=O                   |   |   | 0 |

|                                                         |   |   |   |   |
|---------------------------------------------------------|---|---|---|---|
| CN(C)c1ccc(cc1)N=Nc2ccc3ncsc3c2                         |   |   | 1 |   |
| COC(=O)C1Cc2c([nH]c3ccc(cc23)[N+](=O)C)C(=O)N[C@H](C)C1 |   |   | 1 |   |
| CC(=O)N[C@H](C)C1                                       | 0 | 0 | 1 | 0 |
| CSC(=N)NCCl                                             | 0 | 0 |   |   |
| ClC(=C1OC(=O)C(=C1)Cl)Cl                                |   |   | 1 |   |
| COc1ccc2CN(C)C1                                         | 0 |   |   | 0 |
| CNS(=O)(=O)C1                                           | 0 |   |   |   |
| C[C@@H]1NC(=O)[C@@H](N)CNC(=O)[C@@H](NC(=O)C)C1         |   |   |   | 0 |
| CCCCCOC(=O)c1ccccc1C(=O)OCCCCC                          | 0 |   | 0 |   |
| CN(C)CC\C=C/1\c2ccccc2C                                 |   | 1 |   |   |
| CCCCNC(=O)N[S+](=O)([O-])C1                             |   | 0 |   |   |
| CC(C)(O)C(Cl)C1                                         | 0 | 0 |   | 0 |
| BrCCOC(=O)C(=O)OCCBr                                    |   |   | 1 |   |
| CN1CCN(C)CC1                                            |   |   | 0 |   |
| CCCCCCCCC(Cl)C1                                         | 0 | 0 | 0 | 0 |
| CCCCCCCCCCCCCCCCOCCO(C)C1                               |   | 0 |   |   |
| CN1CCc2cccc3c2[C@@H]1C                                  |   | 0 |   |   |
| CCCCCCCCCO                                              |   |   |   | 0 |
| CC1(O)C2CCCC2C3CCCC13                                   |   |   | 1 |   |
| [O-][N+](=O)c1ccc2CCNc2c1                               |   |   | 1 |   |
| C[C@H](COc1ccccc1)N(CCCl)Cc2ccccc2                      |   |   | 1 |   |
| OCC(O)c1oc(O)c(O)c1O                                    |   |   | 0 |   |
| Cn1c2cccc2c3cccc13                                      |   |   | 1 |   |
| O1c2c1c3cc4cccc4cc3c5cccc25                             |   |   | 1 |   |
| CC(=O)Nc1ccc2c(Cc3cc(O)ccc23)c1                         |   |   | 1 |   |
| CCS(=O)(=O)CCn1c(C)ncc1[N+](=O)[O-]                     |   |   | 1 |   |
| Cc1cc(C)c(NC)C1                                         | 0 | 0 |   |   |
| Cc1cc(C)c(C(=O)O)c(C)c1                                 |   |   |   | 0 |
| OC(=O)COc1cc(Cl)c(Cl)cc1Cl                              |   |   | 0 |   |
| CCCN1CCCC                                               | 0 | 0 |   |   |
| OC(=O)CC(O)(CC(=O)O)C(=O)O                              |   |   | 0 | 0 |
| CCOC(=O)C[C@H](S[P@@](=O)(OC)SC)C1                      |   |   | 0 |   |
| CCCCC(CC)COP(=O)(O)OCC(CC)CCCC                          |   |   |   | 1 |
| CCOP(=S)(OCC)SCCl                                       |   |   | 0 | 0 |
| ONC(=O)C1(CCOCC1)NS(=O)(=O)c2ccc(Oc3ccc(F)cc3)C1        |   |   |   | 0 |
| NNc1ccc(cc1N(=O)=O)N(=O)=O                              |   |   | 1 |   |
| [O-][N+](=O)c1c(Cl)cc(Cl)cc1Cl                          |   |   | 0 |   |
| Nc1ccc2c(no[n+])2[O-]n1                                 |   |   | 1 |   |
| Oc1ncc2cccc12                                           |   |   | 0 |   |
| CC1CC(CC(C)(C)N1C)OC(=O)C(O)c2ccccc2                    |   |   |   | 0 |
| [O-][N+](=O)c1ccc(Br)cc1                                |   |   | 1 |   |
| Cc1c(\C=N\OCc2ccc(Cl)cc2)c3cc(ccc3n1)C1                 |   |   | 0 |   |
| C[C@H](CCCC)C1                                          | 0 | 0 |   | 1 |

|                                                       |   |   |   |
|-------------------------------------------------------|---|---|---|
| Clc1c(Cl)c(Cl)c2Oc3c(Cl)c(Cl)c(Cl)c(Cl)c3             | 0 |   |   |
| Nc1cccc1C(=O)N                                        | 0 | 0 | 0 |
| CC(C)NC[C@@H](O)COc1cccc2C[C@@H](O)C1                 | 0 |   |   |
| CN(C)c1ccc(cc1)C(=C)C=C([N+](C)C)C                    | 0 |   |   |
| Clc1ccc(CO)nc1                                        | 1 | 0 | 0 |
| Clc1ccc(NC(=O)N)nc1                                   | 0 | 0 |   |
| CC(=O)OCc1cccc1[N+](=O)[O-]                           |   |   | 0 |
| CC(=O)NO                                              | 0 | 0 | 1 |
| CN1C2=NC(=O)NC(=O)C2=Nc3cc(C)c(C)nc3                  |   |   | 1 |
| CC1=C(N2[C@@H](O)C(=O)N2)C(=O)N1                      | 0 | 0 |   |
| COc1ccc(\C=C\C(=O)c2ccc(O)cc2)cc1                     |   | 0 |   |
| BrC1ccc(cc1)C(=O)\C=C\C2CCCC2                         |   |   | 0 |
| C[S+](=O)([O-])OCC(O)C(C)N                            |   | 0 |   |
| ClC(=O)c1c(Cl)cccc1Cl                                 |   |   | 1 |
| Nc1ccc(CCN2C(=O)N2)cc1                                | 1 |   |   |
| Cc1c(OCC(F)C)cc1                                      | 0 |   |   |
| CC(C)(C)N(CC(=O)c1ccc(O)c(CO)c1)Cc2ccc(O)cc2          |   |   | 1 |
| COc1ccc(\C=C\C(=O)O)cc1                               |   | 0 |   |
| NNc1nc2ccc3nc4cccc4c(O)c3c2s1                         |   |   | 1 |
| OC[C@H]1O[C@@H](O[C@H]2[C@H](O)[C@@H](O)C2)O1         |   |   | 0 |
| Nc1ccc(cc1)[S+](=O)([O-])N                            |   | 0 |   |
| CO[C@@H]1C(=O)N1                                      | 0 |   |   |
| BrC(Br)C1=C(Br)C(=O)OC1                               |   |   | 1 |
| COc1cc(cc(OC)c1OC)C2OCC3C2COC3c4ccc(O)cc4             |   |   | 0 |
| NC(=S)c1ccc(O)cc1                                     | 0 |   |   |
| C1CC2CCc3cccc3C24OC4C1                                |   |   | 0 |
| OCCc1ccc(Nc2ccc(O)c3C(=O)c4c(O)ccc(O)c43)cc1          |   |   | 1 |
| C1CC(CC=C1)c2cccc2                                    |   |   | 0 |
| COC(=O)CCC(=O)N                                       | 0 | 0 | 0 |
| Cn1nnnc1SC(=O)N                                       | 0 | 0 |   |
| CCCCCCCCCCCCO                                         |   |   | 0 |
| CC(C)CC(C)(O)C#CC(C)(O)CC(C)C                         |   |   | 1 |
| Oc1cccc2ccc[n+](O)c12                                 |   |   | 0 |
| CC(=O)C(=O)c1cccc1                                    |   |   | 0 |
| CN(C)CCNC(=O)c1cc2cccc2c3cccnc13                      |   |   | 1 |
| O=C(CCCCC)N                                           | 0 |   | 0 |
| CO[C@H]1C=CO[C@@]2(C)Oc3c(C)c(O)c4c(O)c(NC(=O)N)cc432 |   |   | 0 |
| CC1COCC2cc3c(cc12)C(C)(C)C(C)C3(C)C                   |   |   | 0 |
| NC(=N)NC(=O)N                                         | 0 | 0 | 1 |
| Cc1ncsc1CCO                                           |   |   | 0 |
| C(Cc1cccc1)C2CO2                                      |   |   | 1 |
| [O-][N+](=O)N                                         | 0 | 0 |   |
| CC(=O)NC[C@@H]1CN(C)C(=O)N1                           |   | 0 |   |

|                                             |   |   |
|---------------------------------------------|---|---|
| [O-][N+](=O)c1ccc2C(=O)NNC(=O)c2c1          | 1 |   |
| BrC1ccc2OCC3=NOC(=O)N                       | 0 |   |
| CC(=O)OCc1cc(ccc1OC(=O)C)C(=O)C             | 1 |   |
| C=CC=C                                      | 1 |   |
| OC(=O)C1=NN(C(=O)C1)c2ccc(cc2)S(=O)(=O)O    | 0 |   |
| Cc1nnc2ccc(nn12)c3cccc(c                    | 0 |   |
| COc1cc(cc(OC)c1OC)C(=O)NC2CCCNC2            | 0 |   |
| CN(CCON(=O)=O)N(=O)=O                       | 1 |   |
| CCCCC(=O)N(C)C                              | 0 | 0 |
| Fc1ccc(NC(=O)c2csc(c2)N(=O)=O)cc1           | 1 |   |
| O=C1NC(=O)                                  | 0 | 0 |
| CCCCCOC(=O)\C=C\c1oc(cc1)[N+](=O)[C         | 1 |   |
| [O-][N+]1=C                                 | 0 | 0 |
| CC(=CCC[C@@](C)(O)[C@@H]1CCC(=CC1)C)C       | 0 |   |
| CCOC(=O)C(C)C(=O)C                          | 0 |   |
| CC(=O)N(Cl)c1ccc2c(Cc3ccccc23)c1            | 1 |   |
| O=C1ON=C2                                   | 0 | 0 |
| CC(=CC1C(C(=O)OCc2oc(CC#C)cc2)C1(C)         | 1 |   |
| CC(=O)C(=C)Br                               | 1 |   |
| O[C@@H]1C                                   | 0 | 0 |
| [O-]S(=O)(=O)c1cc(c2c(NC                    | 0 |   |
| C[C@@H](N'                                  | 0 | 0 |
| CC(O)C(O)C(O)C(O)C1SCCN1N=O                 | 0 |   |
| COC(=O)COc1ccc(Cl)cc1Cl                     | 0 | 0 |
| C[C@H]1CCOS(=O)(=O)O1                       | 1 |   |
| [O-][S+](=O)(N1CCCNCC1)                     | 0 |   |
| [O-][N+](=O)c1oc2cc(ccc2c1)N(CCCl)CC        | 1 |   |
| CO[C@]1(NC(=O)CSC[C@@H](N)C(=O)[O-])[C@H]2S | 0 |   |
| C[C@@H](O)c1cc2ccc3ccccc4ccc(c1)c2c:        | 1 |   |
| Cc1cccc(c1)N=O                              | 0 |   |
| NC1=Nc2c(nc(Br)n2C3OC4                      | 0 |   |
| ON(=O)=C=Cc1occc1                           | 0 |   |
| CCCCCCCCC                                   | 0 | 0 |
| CC12CCC3C(CC=C4CC(=O)CCC34)C1CCC2           | 0 |   |
| COC(=O)\C(=C/OP(=O)(OC)OC)\c1cc(Cl          | 0 |   |
| CCCC[n+]1cccc(C)c1                          | 0 |   |
| COc1c(CN2C                                  | 0 | 0 |
| CCCC\C=C/C                                  | 0 | 0 |
| COc1cc2C[C@@H]3N(C)C                        | 0 |   |
| CNC[C@@H]1CC[C@@H](N)[C@@H](O[C@@H]2[C      | 0 |   |
| Cc1cc(NC(=O)C(=O)O)cc(C)c1Oc2ccc(O)c3CCCC23 | 0 |   |
| COC(=Nc1nc2ccc(cc2[nH]1)C(=NO)c3ccc         | 1 |   |
| Cc1cccc(c1N)[N+](=O)[O-]                    | 1 |   |

|                                       |   |   |   |
|---------------------------------------|---|---|---|
| C[N+](C)(C)C                          | 0 | 0 | 0 |
| Fc1ccc(C=O)cc1Br                      |   |   | 0 |
| C[n+]1ccsc1N=Nc2c(c3ccccc3)n(C)c4ccc  |   |   | 1 |
| CCCCOC(O)CC                           |   |   | 0 |
| C[N+](C)(C)C                          | 0 | 0 | 0 |
| ClC1=C(Cl)[C@@]2(Cl)[C@H]3COS(=O)(    |   |   | 0 |
| [N-]=[N+]=NCc1ccccc1                  |   |   | 1 |
| OCC(O)C1OC(=O)C(=C1O)O                |   |   | 0 |
| CCN(CC[N+](C)(C)C)c1ccc(cc1)N=Nc2ccc  |   |   | 1 |
| CC(=O)N\N=C\C1=CN(O)c2ccccc2N1O       |   |   | 1 |
| NCCCC(N)C(=O)O                        |   | 0 | 1 |
| NCC(O)(C[S+](=O)(O)[O-])              |   | 0 |   |
| CN1[C@H]2CC[C@@H]1CC(O)C2             |   |   | 0 |
| CCCOc1ccc2nc(NC(=O)OC)[nH]c2c1        |   |   | 0 |
| CCCCOCCOC(=O)COc1ccc(Cl)cc1Cl         |   |   | 0 |
| CCN(CC)c1ccc(N=O)c(O)c1               |   |   | 0 |
| CCCCC(CC)OC(=O)c1cccc(c1)C(=O)OC(C    |   |   | 0 |
| CC(CC1=CC(=                           | 0 | 0 | 1 |
| CC(C)NC(C)C                           | 1 | 1 |   |
| C=C=O                                 |   |   | 1 |
| CC1=CC(=O)N                           | 0 | 0 | 0 |
| [O-][N+](=O)c1ccc2c(OC(=O)c3ccccc23)  |   |   | 1 |
| CN1CCN(CC1                            | 1 | 0 |   |
| OC[C@@H](O)CN=[N+]=[N-]               |   |   | 1 |
| c1ccc2c(c1)c3nc4ccccc4c5c6ccccc6nc2c: |   |   | 0 |
| Clc1c(Cl)c(Cl)c2C(=O)OC(=O)c2c1Cl     |   |   | 0 |
| O=C1OC(=O)                            | 0 | 0 |   |
| CN(Cc1cccc(c1)C(F)(F)F)N=O            |   |   | 1 |
| O=N(=O)c1cc2ccccc2c3ccccc13           |   |   | 1 |
| OC(=O)c1ccc                           | 0 | 0 | 0 |
| CC(C)COC(=O)C(=C)C                    |   |   | 0 |
| Cc1cc2[nH]c3cc(C)c4ccccc4c3c2c5ccccc1 |   |   | 1 |
| CCOP(=S)(OCC)SCSc1cc(Cl)ccc1Cl        |   |   | 0 |
| CSCNc1ccccc1C(=O)C                    |   |   | 0 |
| CCCCCN(N=O)C(=N)NN(O)O                |   |   | 1 |
| Cc1cccc(N=Nc2c(O)ccc3ccccc23)c1C      |   |   | 0 |
| C[C@@]1(CO1)c2ccc(cc2)[N+](=O)[O-]    |   |   | 1 |
| BrC1cc(Br)c(OCCOc2c(Br)cc(Br)cc2Br)c( |   |   | 0 |
| Cl\C=C\c1c(Cl)c(Cl)c(Cl)c(Cl)c1Cl     |   |   | 0 |
| NC(=O)C1(CC                           | 1 |   | 0 |
| COC(=O)\C(=C\c1occc1)\[N+](=O)[O-]    |   |   | 0 |
| Cc1cccc(CN2                           | 1 | 0 |   |
| Oc1nc2ccccc2n1C3CCN(CCCC(c4ccc(F)cc   |   |   | 0 |

|                                               |   |   |   |
|-----------------------------------------------|---|---|---|
| COc1cccc(CCc2ccccc2OCC(                       | 1 |   |   |
| CCCCCCCCC(                                    | 0 | 0 | 0 |
| COc1ccc2nc3cc(Cl)ccc3c(NCCCNCCCl)c2i          |   | 1 |   |
| CC(C)c1ncc([                                  | 0 | 0 |   |
| O1[C@@H]2[C@H]1c3ccccc3c4c2ccc5c              |   | 1 |   |
| CC(C(=O)O)c1ccc(C2CCCC2)c3ccccc13             |   |   | 0 |
| CC[C@]12CC                                    | 0 | 0 |   |
| CCCCC(CC)CC                                   | 0 | 0 | 0 |
| CCN(CC)CCO(                                   | 1 |   |   |
| CN(N=O)C(=O)c1c(ncn1C)N(C)N=O                 |   | 1 |   |
| CC(=O)Nc1nr                                   | 0 |   | 0 |
| CN(C(=O)CN(CCO)CC(=O)N(C)C(C)(C)Cc1           |   | 0 |   |
| CCN(CC)C(=O)[C@H]1CN(C)[C@H]2Cc3c[nH]c4cccc   |   |   | 1 |
| COc1c(C(=O)O)c(O)nc2ccccc12                   |   | 0 |   |
| O[C@H]([C@H](O)C(=O)O)C(=O)O                  |   |   | 0 |
| CC1CCNC1                                      |   |   | 0 |
| O=CC=Cc1oc(cc1)N(=O)=O                        |   | 1 |   |
| CC(=O)Oc1ccc(C=C)cc1                          |   |   | 0 |
| Cc1ccc(cc1)S(=O)(=O)OCc2ccc(cc2)N(=C          |   | 1 |   |
| CCc1ccccc1Nc2ccc(Nc3ccccc3CC)c4C(=O           |   | 1 |   |
| Cc1ccc2cc3ccccc3cc2c1                         |   | 1 |   |
| NC(Cc1ccccc1)C(=O)O                           |   | 0 | 0 |
| ClC1C2(Cl)C3C4C5OC5C6C4C1(Cl)C(Cl)(C          |   | 1 |   |
| CC(=O)NC(CSC(=C(Cl)Cl)Cl)C(=O)O               |   | 1 |   |
| CCN(CC)CCNc1ccc(COC(=O)c2occc2)c3S            |   | 1 |   |
| CC(=O)Nc1ccc2ccc3ccc(O)c4ccc1c2c34            |   | 1 |   |
| CC(C)N(CCC(=                                  | 1 | 0 |   |
| OC(=O)c1ccc(C=NN2N=Nc3c([nH]c4cccc            |   | 1 |   |
| CN(C)c1nc2c3cccnc3ccc2n1C                     |   | 1 |   |
| OC1C(O)c2ccc3cccc4cc5c6ccccc6C1=c5c           |   | 0 |   |
| F\C(=C/1\CN                                   | 1 | 1 |   |
| CCOP(=S)(OCC)Oc1cnc2ccccc2n1                  |   | 0 | 0 |
| [O-]C(=O)[C(                                  | 0 | 0 | 0 |
| O=C1NNC(=O)C=C1                               |   | 1 | 0 |
| OCC(=O)O                                      |   | 0 |   |
| OP(=O)(O)C                                    | 0 | 0 | 0 |
| Nc1ccc2cccn2c1                                |   | 1 |   |
| Nc1cccc(c1N)N(=O)=O                           |   | 1 |   |
| NC(=N)NN=C1C=CC(=NNC                          |   | 0 | 1 |
| CC[C@H](CO)NCCN[C@H](CC)CO                    |   | 0 |   |
| Cc1c(C(=O)O)c(O)cc2C(=O)c3c(O)c(O)c(          |   | 1 |   |
| COc1nnc(c2ccc[n+](O)c2)n1c3c(Cl)c(Cl)cc4NC(=O |   |   | 0 |
| CN1[C@H]2CC[C@H]1CC(C2)OC(=O)c3cc(C)cc(C)c3   |   |   | 0 |

|                                                  |   |   |   |
|--------------------------------------------------|---|---|---|
| [O-][N+](=O)c1ccccc1SSC(=C(Cl)Cl)Cl              | 1 |   |   |
| ClCc1c2ccccc2c3ccc4cccc5ccc1c3c45                | 0 |   |   |
| Oc1ccc2cc(SSc3ccc4cc(O)ccc4c3)ccc2c1             | 0 | 1 |   |
| CNC(=CN(=O)=O)NCCSCc1csc(CN(C)C)n1               |   |   | 0 |
| CN(Cc1ccc(C)cc1)N=O                              | 0 |   |   |
| CN(C)CCNC(=O)c1cccc2cc(oc12)c3ccccc:             | 1 |   |   |
| CC1(C)CC(=O)CC(C)(C)N1                           |   |   | 0 |
| CN1[C@@H] 1 1                                    |   |   |   |
| CCCCCCCC\C=C/CCCCCCCC(=O)OC                      | 0 | 0 |   |
| CN(C)N=Nc1[nH]cnc1C(=O)N                         |   |   | 0 |
| ClC(Cl)C(c1ccc(Cl)cc1)c2ccc(Cl)cc2               | 0 | 1 |   |
| COc1cccc2OC3(C)OOC3(C)c12                        | 1 |   |   |
| Oc1ccc2c3ccccc3[nH]c2c1[N+](=O)[O-]              | 0 |   |   |
| COc1cc2OC3OC=CC3(O)c2c4OC(=O)C5=                 | 1 |   |   |
| CC(C)(O)CCc1ccccc1                               |   |   | 0 |
| CN(C)CCNC(=O)c1cccc2nc3ccccc3cc12                | 1 |   |   |
| CC1CC[C@@]2(NC1)O[C@ 1                           |   |   |   |
| CCCC1CCOC(C)S1                                   |   |   | 0 |
| Cl\C=C/C[N+]12CN3CN(CN(C3)C1)C2                  | 1 | 0 |   |
| CN(C)CC\C=C 1 1                                  |   |   |   |
| CC(C)C1=C(CN(C)C(C)Cc2ccccc2)N(C)N(C1=O)c3ccccc: |   |   | 0 |
| Oc1cccc2c1ccc3[nH]c4cc(c5ccccc5c4c23             | 1 |   |   |
| COc1ccc(C=C)cc1                                  | 0 |   |   |
| [O-][n+]1cc2ncccc2cn1                            | 0 |   |   |
| CCNC(=O)[C( 1                                    |   |   |   |
| C[N+](C)(C)C 0 0                                 |   | 0 | 0 |
| OCc1c(cccc1[N+](=O)[O-])[N+](=O)[O-]             | 0 |   |   |
| BrC(Br)C(Br)Br                                   | 0 | 0 |   |
| C[C@@H]1C[C@H]2[C@@H]3CCC4=CC(=O)C=C[C@]4        |   |   | 0 |
| Clc1ccc(CNC(=N)SCCCc2c[i 0                       |   |   |   |
| CCCN(CCC)C( 0                                    |   |   |   |
| O=N(=O)c1ccc2cccc3CCc1c23                        | 1 |   |   |
| CC(C)(O)C(=O)c1ccccc1                            |   |   | 0 |
| Cc1ccc(c(C)c1N(=O)=O)N(=O)=O                     | 1 |   |   |
| ClCCOCOC(Cl                                      |   |   | 0 |
| CC(=O)Oc1ccc(cc1)C(c2ccc 0 0                     |   |   | 1 |
| CC(=O)c1ccc2N=C3N(Cc2c1)C(=O)c4ccc               | 1 |   |   |
| CO[C@@H]1C[C@H](CC[C@H]1O)\C=C(/C)\[C@H]         |   | 1 |   |
| CCCCCCCC(=O)OCC=C                                | 0 | 0 |   |
| Cc1cc2C(=O)c3cc(O)cc(O)c3C(=O)c2c(O              | 1 |   |   |
| CNC[C@H](C 0 0                                   |   |   | 0 |
| CC(=O)OCC(=O)[C@H]1CC[C@H]2[C@@H]3CC[C@H]        |   |   | 0 |
| OC[C@H](S)( 0 0                                  |   |   |   |

|                                                           |   |   |   |   |
|-----------------------------------------------------------|---|---|---|---|
| <chem>Nc1ccc(Oc2ccc(cc2)N(=O)=O)cc1</chem>                | 1 |   |   |   |
| <chem>CC1CC2C(CCC3(C)C2CCC3(OC(=O)C)C(=C</chem>           | 0 |   |   |   |
| <chem>CC(=O)c1c(C)c(c(c(c1C)[N+](=O)[O-])C(</chem>        | 0 |   |   |   |
| <chem>CCOP(=S)(OCC)Oc1nc(Cl)c(Cl)cc1Cl</chem>             | 0 |   | 1 |   |
| <chem>C[C@@H](N)Cn1ccc2cc(F)</chem>                       | 1 |   |   |   |
| <chem>CC(C)(CO)C(O)C(=O)NCCCCO</chem>                     | 0 |   | 0 |   |
| <chem>CC(=CCCC(=CCCC(=O)C)C)C</chem>                      |   |   | 0 |   |
| <chem>CCOC(=O)CN[C@H](C1CCCC1)C(=O)N2CC[C@H]2C(=</chem>   |   |   | 0 |   |
| <chem>CCCCN</chem>                                        | 0 |   |   |   |
| <chem>Cc1oc2c(NC(=O)c3c(Cl)cccc3Cl)cccc2c1C(C)(C)O</chem> |   |   |   | 1 |
| <chem>Nc1ccc2ccccc2n1</chem>                              | 1 |   |   |   |
| <chem>O=N(=O)c1ccc2C=Cc3cccc1c23</chem>                   | 1 |   |   |   |
| <chem>CCCCCCCCC(=O)NCc1cc(OC</chem>                       | 1 |   |   |   |
| <chem>CCCCO</chem>                                        | 0 | 0 | 0 | 0 |
| <chem>COc1ccc(cc1)C2OC2C</chem>                           |   |   | 1 |   |
| <chem>FC(Cl)(Cl)Cl</chem>                                 |   |   | 0 |   |
| <chem>FC(F)(F)c1ccc(Cl)c(Cl)c1</chem>                     |   |   |   | 0 |
| <chem>C1CCCCCCCCC1</chem>                                 |   |   |   | 0 |
| <chem>CCCCCCCCC</chem>                                    | 1 | 0 | 0 | 1 |
| <chem>CN1C(=O)Nc</chem>                                   | 0 | 0 |   |   |
| <chem>Clc1ccc(NC(=</chem>                                 | 0 | 0 |   |   |
| <chem>NC(=NC(=O)c</chem>                                  | 1 | 1 |   |   |
| <chem>CC(C)c1ccc(C</chem>                                 | 0 | 0 | 0 |   |
| <chem>Nc1ccc(cc1)c2ccc(N)c(c2)[N+](=O)[O-]</chem>         |   |   | 1 |   |
| <chem>Nc1ccc(cc1)c2ccc(cc2)[N+](=O)[O-]</chem>            |   |   | 1 |   |
| <chem>CCCN(CCC)C1</chem>                                  | 1 | 0 |   |   |
| <chem>FC(F)(F)c1ccc(Cl)cc1Cl</chem>                       |   |   |   | 0 |
| <chem>Nc1nc(N)nc(i</chem>                                 | 0 | 0 |   | 0 |
| <chem>NC1=C(Cl)C(=O)N(N=C1)c2ccccc2</chem>                |   |   | 0 | 0 |
| <chem>CNC1CCCN(C</chem>                                   | 0 | 0 |   | 0 |
| <chem>COc1cc(ccc1N=C(C)O)N(=O)=O</chem>                   |   |   | 1 |   |
| <chem>NC(=N)c1ccc</chem>                                  | 0 | 0 |   |   |
| <chem>CC1(C)CCC(C)(C)c2cc(ccc1</chem>                     |   | 0 |   | 1 |
| <chem>ClC(=C(c1ccc(Cl)cc1)c2ccc(Cl)cc2)Cl</chem>          |   |   | 0 | 1 |
| <chem>Cc1ccc(C)c(NO)c1</chem>                             |   |   | 1 |   |
| <chem>CN(C)CCCl</chem>                                    |   |   | 1 |   |
| <chem>O[C@@H](C</chem>                                    | 0 | 0 |   |   |
| <chem>CCN1C[C@]2</chem>                                   | 0 | 0 |   |   |
| <chem>COc1ccc2C(=O)c3nccc4cc(OC)c(OC)c(c2</chem>          |   |   | 0 |   |
| <chem>CC(C(=O)OC1CC2CCC(C1)N</chem>                       |   | 0 |   |   |
| <chem>CC(C)(O)c1ccccc1CC[C@H]</chem>                      |   | 0 |   |   |
| <chem>Cn1c(nc2ncc(cc12)c3ccccc3)N(=O)=O</chem>            |   |   | 1 |   |
| <chem>BrC1ccc(NC(=O)c2cc(Br)c(i</chem>                    |   | 0 |   | 1 |



|                                        |   |   |     |
|----------------------------------------|---|---|-----|
| Cc1nc2C(=O)C=CC(=O)c2c3[nH]c4ccccc4    | 1 |   |     |
| CN(C)CCN(C)CCO                         |   | 0 |     |
| CC(Br)CBr                              | 1 |   |     |
| CC(C)CCCO                              |   | 0 |     |
| Oc1cc(O)c2C(=O)C=C(Oc2c                | 0 | 0 |     |
| COC1=CC(=O                             | 0 | 0 |     |
| Oc1c(cc2ccc3cccc4ccc1c2c34)[N+](=O)[   | 1 |   |     |
| CN(Cc1ccc(cc1)C(=O)O)N=O               | 0 |   |     |
| C\C=C/1\C[C@H](C)[C@@](O)(CO)C(=C      | 1 |   |     |
| CN(C)c1nc2c                            | 0 | 0 |     |
| Cc1c2ccccc2cc3ccc4ccccc4c13            | 1 |   |     |
| CCOC(=S)[S-]                           |   | 0 |     |
| COC1=C[C@H]2[C@H]3CCc                  | 0 |   |     |
| CCCOC(=O)c1ccccc1C(=O)OCCC             |   | 0 |     |
| CN(C)CCCN(C(=O)C=C                     | 0 |   |     |
| CC[C@](C)(Cl                           | 0 | 0 |     |
| Nc1nc(O)c2[nH]nnc2n1                   | 0 |   |     |
| CC(=O)c1ccc(cc1)[S+](=O)               | 0 |   |     |
| O=C1C=Cc2c(cc3ccc4cccc5ccc2c3c45)C1    | 1 |   |     |
| CN1CCC[C@H                             | 1 | 1 |     |
| Cc1cc(O)c2C(=C3C(=O)C4C(O)C5C6C(O)     | 0 |   |     |
| NC(=N)c1ccc(C[S+](=O)([C               | 0 |   |     |
| CN1C(=O)OC                             | 0 | 0 | 0 1 |
| CN(C)CCNC(=O)C1=CC=CN2C(=O)c3ccccc     | 1 |   |     |
| CC(C)(C)c1ccc(cc1)c2ccc(cc2)N=O        | 1 |   |     |
| CCOP(=O)(C)SCCN(C(C)C)C(C)C            | 0 |   |     |
| CCCCOc1ccc(N)cc1                       |   | 0 |     |
| COC(=O)[C@@H](N1CCc2sccc2C1)c3ccccc3Cl |   | 0 |     |
| Oc1ccc2c(O)cccc2c1                     | 1 |   |     |
| CCCN1C(=O)I                            | 0 | 0 |     |
| Nc1nc(cs1)c2cccnc2                     | 0 |   |     |
| COc1ccc(cc1[N+](=O)[O-])C(=O)Nc2ccc    | 1 |   |     |
| OC(=O)C(F)(F)C(F)(F)C(F)(F)C(F)(F)C(F) | 0 | 0 |     |
| [O-][N+](=O)c1oc\C=N\N                 | 0 | 1 |     |
| Nc1ccc(C=C)cc1                         | 1 |   |     |
| CC1Cc2c(Cl)cc(C(=O)NC(Cc3ccccc3)C(=O   | 0 |   |     |
| CNC(C)Cc1ccccc1                        | 0 |   |     |
| Nc1cc(cc(Cl)c1O)[N+](=O)[O-]           | 1 |   |     |
| CCCN(CCCO)N=O                          | 1 |   |     |
| c1cc2cnccc2cn1                         | 0 |   |     |
| CC(C)CCCCCOC(=O)Cc1cc(Cl)c(Cl)cc1Cl    | 0 |   |     |
| OS(=O)(=O)[                            | 0 | 0 | 0   |
| CO[C@H]1[C                             | 0 | 0 |     |

|                                                 |   |   |   |
|-------------------------------------------------|---|---|---|
| O[C@@H]1C                                       | 0 | 0 | 0 |
| CCCC1COC(Cn2cncn2)(O1)c3ccc(Cl)cc3Cl            |   |   | 0 |
| COc1ccc2C[C@H]3N(CCC4C                          |   | 0 |   |
| CC=C(C)C=O                                      |   |   | 0 |
| CCC(=O)N(C1CCN(Cc2ccccc2)CC1)c3ccccc3           |   |   | 0 |
| c1cnc2c(c1)ccc3c4cccnc4ccc23                    |   |   | 1 |
| OCCc1ccc(Nc2ccc(O)c3C(=O)c4c(O)ccc(c4C(=O)c23)N |   |   | 1 |
| Cc1ccc2c(c1)cc3ccc4cccc5ccc2c3c45               |   |   | 1 |
| ClC(Cl)C(Cl)(Cl)SN1C(=O)C2CC=CCC2C1=            |   |   | 0 |
| OCC1O[C@H                                       | 0 | 0 | 1 |
| CS(=O)(=O)c1ccc(O)c(N)c1                        |   |   | 0 |
| CC(C)(C)[C@                                     | 1 | 1 |   |
| Nc1nc(Nc2ccccc2)nc3c1nc                         |   | 0 |   |
| Oc1ccccc1Nc2ccc(cc2[N+](=O)[O-])[N+]            |   |   | 1 |
| [O-][N+](=O)                                    | 0 | 0 | 1 |
| CC(C)[C@H](CO)Nc1nc(Nc                          |   | 0 |   |
| ClCc1ccc2ccc3cccc4ccc1c2c34                     |   |   | 1 |
| OCC1O[C@@                                       | 0 | 0 |   |
| CC(C)c1cccc(O)c1                                |   |   | 1 |
| C[C@@H]1C                                       | 0 | 0 |   |
| CC(=O)N(O)c1ccc(Cl)c(Cl)c1                      |   |   | 0 |
| CCCC(=O)O[C                                     | 0 | 0 |   |
| COc1ccc(C(=O)C2C3C4COC                          |   | 0 |   |
| CCCCC[C@H]                                      | 0 | 0 | 0 |
| CSCCC(NC(=O)COc1cc(Cl)c(Cl)cc1Cl)C(=            |   | 0 |   |
| CCCN(C1CCN(CC1)C(=O)C2CCNCC2)[C@@H]3CCc4ccc     |   |   | 0 |
| Oc1ccc(Cl)c2C(=O)c3c(O)ccc(Cl)c3C(=O)           |   | 1 |   |
| C1CCCC1                                         |   | 0 | 0 |
| Nc1ccc(cc1)c2ccc(cc2)c3ccc(cc3)c4ccc(N          |   | 0 |   |
| Cc1ccccc1OC                                     | 0 | 0 | 0 |
| CC(C)(O)CCc1ccc(O)c2C(=O)c3c(O)c4C5(            |   | 1 |   |
| CCCCCCCCCCCCSC                                  |   |   | 0 |
| C[S+](=O)([O-])Nc1ccc(cc1                       |   | 0 |   |
| CN(C)CCCN=C1c2ccccc2Nc3c(ccc(c13)N(             |   |   | 1 |
| NC(CSc1ccc(cc1N(=O)=O)N(=O)=O)C(=C              |   |   | 1 |
| OC(=O)[C@H]1[C@@H](C(=O)O)[C@@                  |   | 0 |   |
| O=Cc1cccc(Oc2ccccc2)c1                          |   |   | 0 |
| CC12CC(O)C3C(CCC4=CC(=O)C=CC34C)C:              |   | 0 |   |
| CCCCCCCCCCCCSCC(=O)O                            |   |   | 0 |
| c1ccc2c(c1)cc3c4cccc4c5cccc6ccc2c3c5            |   | 1 |   |
| CNc1ccccc1C(=O)OC                               |   | 0 |   |
| Cc1cc(N)c(C)c(c1N)[N+](=O)[O-]                  |   | 1 |   |
| O=C1OC(=O)c2cccc3cccc1c23                       |   |   | 1 |

|                                               |   |   |   |   |
|-----------------------------------------------|---|---|---|---|
| C[C@@H]1CCc2c1ccc3c2ccc4ccccc34               | 1 |   |   |   |
| OC(=O)[C@H]1NC[C@H]2                          | 0 |   |   |   |
| CCOC(=O)\C=C/C(=O)OCC                         |   |   | 0 |   |
| C[C@H]1C[C@@H](C)C(=O)[C@H](C1)[              | 0 |   |   |   |
| NCCNCCNCCI                                    | 0 | 0 | 1 | 0 |
| C[C@H](CCI)O[C@H](C)CCI                       | 1 |   |   |   |
| Nc1ccc(Br)cc1                                 | 0 |   |   | 0 |
| CC(=O)Nc1ccc(cc1)[S+](=C                      | 0 |   |   |   |
| CCc1ccc(Br)cc1                                |   |   |   | 0 |
| CNc1ncn(C)c1C(=O)N(C)N=O                      | 1 |   |   |   |
| Cc1cc(N)c(cc1N)N(=O)=O                        | 1 |   |   |   |
| COc1ccc(OC)c(c1)C(O)CNC(=O)CN                 |   |   | 0 | 0 |
| Cc1ccc(N=Nc2c(O)c(cc3ccccc23)C(=O)O           | 0 |   |   |   |
| Nc1ccc2c(Cc3cc(N)ccc23)c1                     | 1 |   |   |   |
| Cc1c(C)c(Br)c(Br)c(Br)c1Br                    | 0 |   |   |   |
| COC(=O)C12OC1(C)C(C)(O)NC2=O                  | 1 |   |   |   |
| CCN(CC)CCN(                                   | 1 | 0 |   |   |
| COc1c2ccoc2nc3c(O)c4OCOc4c(CC=C(C)            | 0 |   |   |   |
| OCNC(=O)C=C                                   | 0 |   |   |   |
| CN(C)c1ccc(cc1)c2ccc(cc2)N(C)C                | 0 |   |   |   |
| CCCCOC(=O)CC#N                                |   |   |   | 0 |
| [O-][N+](=O)c1ccc2[nH]c3ccc(cc3c2c1)[         | 1 |   |   |   |
| BrC1cc(Oc2cc(Br)c(Br)c(Br)c2Br)c(Br)c(Br)c1Br |   |   |   | 0 |
| C\C=C/c1ccccc1)\N(=O)=O                       |   |   |   | 1 |
| COc1ccc(CN2C3C2c4ccccc4c5ccccc35)cc           | 1 |   |   |   |
| CN(C)CCC(=O)O[C@@H]1                          | 1 |   |   |   |
| C[C@@]12CCC(=O)C=C1CC[C@@H]3[C@@H]2CC[C@@     |   |   |   | 0 |
| CCN[C@@H](C)Cc1ccccc1                         |   |   |   | 0 |
| OCc1cccc2c3cccc4cccc(c12)c34                  | 0 |   |   |   |
| CC(C)(C)OOC(C)(C)CCC(C)(C)OOC(C)(C)C          | 0 |   |   | 0 |
| COC(=O)C1=(                                   | 0 | 0 | 1 | 0 |
| C\C=C/1\C[C@@H](C)[C@                         | 0 |   |   |   |
| NCCc1ccc(cc1)[S+](=O)([O                      | 0 |   |   |   |
| CNC(=O)O\N=C(\C)/SC                           |   |   |   | 0 |
| OC1CCC(O)(CN(N=O)C(Cc2ccccc2)C(=O)            | 0 |   |   |   |
| C(CN1CCOCC                                    | 1 | 0 |   | 0 |
| c1ccc2c(c1)ccc3ncccc23                        | 1 |   |   |   |
| O1C2C1c3ccccc3c4ccccc24                       | 1 |   |   |   |
| CCCCCCCCC(                                    | 0 | 0 |   |   |
| CC(=O)N(CC(                                   | 0 | 0 |   |   |
| C[C@H](C[C@H](N)C(=O)(                        | 0 |   |   |   |
| CC1=C(SCCO1)C(=O)Nc2ccccc2                    | 0 |   |   | 0 |
| COc1ccc(C=(                                   | 0 | 0 | 1 | 1 |

|                                           |   |   |   |
|-------------------------------------------|---|---|---|
| Oc1ccc2ccccc2c1N=Nc3ccc(cc3)N=Nc4c        | 1 |   |   |
| Cn1c(N)nc2ccc3ncccc3c12                   | 1 |   |   |
| CN(C)c1ccc(\C=C\C2ccc(cc2)N(=O)=O)cc1     |   |   | 0 |
| OCCN1CCN(C                                | 1 | 1 |   |
| CCOCC=O                                   |   |   | 0 |
| CC\C=C/C\C=C=                             | 0 | 0 | 0 |
| CN1C[C@H](                                | 1 | 1 |   |
| C[C@H](CCC(=O)O)[C@H]                     |   | 0 | 1 |
| NC(CSC(F)(F)C(Cl)Br)C(=O)O                | 1 |   |   |
| Cc1ccc(OCC2CO2)cc1                        | 1 |   |   |
| N[C@@H](C                                 | 0 |   |   |
| CC1(C(Cl)Cl)C2C(Cl)C(Cl)C1(C(Cl)Cl)C(Cl)C | 0 |   |   |
| [O-][N+](=O)c1cc(c2ccc3cccc4ccc1c2c3      | 1 |   |   |
| Oc1ccc2[nH]ccc2c1                         | 0 |   |   |
| CN(CC(=O)C)N=O                            | 1 |   |   |
| Oc1ccc2ccc3c4ccccc4ccc3c2c1               | 1 |   |   |
| COc1ccc2c(c1)C(=O)c3nccc4cc5OCOc5c        | 1 |   |   |
| O1C2C1c3c4c2cccc4cc5ccc6ccccc6c35         | 1 |   |   |
| COC(=O)\C(=C\C=C\C=C\C=C\C=C\C=C/C)\C     | 0 |   |   |
| CC(C)(OOC(C)(C)c1cccc1)c2cccc2            | 0 |   | 1 |
| CS(=O)(=O)OCCc1ccc(OCC2ccccc2)cc1         | 1 |   |   |
| CC(C)(C)c1cccc1                           |   |   | 0 |
| CC(CO)(CO)N(=O)=O                         |   |   | 0 |
| CC(=O)OC(C)(C)C1Cc2cc3C=C(C(=O)Oc3c       | 0 |   |   |
| CC(C)(C)C(O)C(Cc1ccc(Cl)cc1)n2cncn2       |   |   | 0 |
| CC(=O)Nc1cccc1C                           | 1 |   | 0 |
| Nc1ccc(Nc2c3ccccc3nc4ccccc24)cc1          | 1 |   |   |
| CCCCCCCC(=O)OCC(O)CO                      | 0 |   | 0 |
| Cc1ccc(NO)cc1                             | 1 |   |   |
| CCC1(CC(=O)O)OCCc2c1[nH]c3c(cccc23)       | 0 |   |   |
| C\C(=C/C=C/C/C(=C/C(=O)Nc                 | 0 |   |   |
| OC(=O)c1ccc(O)c(O)c1                      |   |   | 0 |
| O=C1N2Cc3c                                | 0 | 0 | 0 |
| Cc1noc(NS(=                               | 0 |   | 0 |
| C1CCC2(CC1)CO2                            | 0 |   |   |
| Clc1ccc(CN2C3C2c4ccccc4c5ccccc35)cc1      | 1 |   |   |
| CC[C@H](N)c1cccc1                         |   |   | 0 |
| CC#CCOC(=O)C1=CCCN(C)(                    | 0 |   |   |
| COC1=NC(=O)N(CC(O)CN=N#N)C=C1             | 1 |   |   |
| CCNC(=O)[C(                               | 0 |   |   |
| COC(=O)[C@H]([C@H]1CCCCN1)c2ccccc         | 0 |   |   |
| COc1cc2nc(n                               | 0 | 0 | 0 |
| ClC(Cl)C#N                                | 1 |   | 0 |

|                                               |   |   |   |
|-----------------------------------------------|---|---|---|
| CC(=O)OCC(=O)[C@@]1(O)CC[C@H]2[C@@H]3CCCC4    | 0 | 0 | 0 |
| Clc1ccc(cc1)(                                 | 0 | 0 |   |
| OC[C@@H](O)[C@@H](O[C@H]1O[C@                 | 0 |   |   |
| OC1COC(C(O)C1O)N(N=O)c2ccc(cc2)N(:            | 1 |   |   |
| Oc1cc(O)c2C(=O)C=C(Oc2(                       | 0 |   | 1 |
| CCCCNC(=O)I                                   | 0 |   | 0 |
| CCC(C)(CN(C)C)OC(=O)c1ccccc1                  |   |   | 0 |
| CCCCCCCCc1ccccc1C(CO)OS(=O)(=O)O              | 0 |   |   |
| CCCCOCC(=O)O                                  | 0 |   |   |
| CC(C)CCC[C@@H](C)CCC[C@@H](C)CCC[C@]1(C)CCc:  | 0 |   |   |
| N1C2C1c3cccc4cccc2c34                         | 1 |   |   |
| CC(=C)C=O                                     | 1 |   |   |
| COc1cc(O)c2C(=O)C(=O)C(Oc2c1)c3ccc(           | 1 |   |   |
| [O-][N+]1=C(C(=O)c2ccccc                      | 0 |   |   |
| Nc1cccc(c1CO)[N+](=O)[O-]                     | 0 |   |   |
| Cc1ccc2C(=O)N3C=C(CC3C(O)Nc2c1O)\(            | 1 |   |   |
| ClCc1cccc(c1)N(=O)=O                          | 1 |   | 0 |
| CN(C)[C@@I                                    | 0 | 0 |   |
| COC(=O)Nc1                                    | 0 |   | 0 |
| CC(C)CCC[C@@H](C)CCC[C@@H](C)CCC[C@]1(C)CCc:  | 0 |   |   |
| OC(=O)c1cccc2cccn12                           | 0 |   |   |
| CC12CCC3C(Cc4cc(O)ccc34)C1CCC2O               | 0 |   |   |
| Oc1c2ccccc2nc3ccccc13                         | 0 |   |   |
| O=N(=O)c1ccc2c(c1)c3cccc4cccc2c34             | 1 |   |   |
| COC(=O)C1=C(C)NC(=C(C1                        | 0 |   | 0 |
| CC(=O)OC12CCC3[C@](CCC4[C@@]3(C)              | 0 |   |   |
| C1CCCC2OC2CC1                                 | 0 |   |   |
| Oc1nnc(O)c2cc(ccc12)[N+](=O)[O-]              | 1 |   |   |
| CC1CCC2(O1)C(=CCCC2(C)C                       | 0 |   |   |
| COc1cc2O[C@@H]3OC=C[C@H]3c2c4O                | 1 |   |   |
| CC(=S)N                                       |   |   | 0 |
| COc1ccc(\C=C\c2ccc(N)cc2)cc1                  | 1 |   |   |
| CCC#N                                         | 0 |   | 0 |
| C(Oc1ccc(cc1)N(CC2CO2)CC3CO3)C4CO4            |   |   | 0 |
| OC(=O)Cc1cr                                   | 0 | 0 | 0 |
| CCOC(=O)Cc1cccc(c1)c2cc(CCCCCc3ccc(O[C@H]4O[C | 0 |   |   |
| CC12CCC(=O)                                   | 0 | 0 |   |
| OC(=O)c1ccc(c(c1)[N+](=O)[O-])[N+](=          | 1 |   |   |
| CCc1cccc(C)c1                                 |   |   | 0 |
| OC1CCOP(=O)(N1)N(CCCl)CCCl                    | 1 |   |   |
| COc1cc(NCc2ccc3nc(N)nc(                       | 0 |   |   |
| N[C@H]1C[C@H]([C@H])(C                        | 0 |   |   |
| OCc1cc2ccccc3ccc4cc5ccccc5c1c4c23             | 0 |   |   |



|                                            |   |   |   |   |
|--------------------------------------------|---|---|---|---|
| N#C\C=C/C#N                                | 0 |   |   |   |
| COc1nncc2ccncc12                           | 0 |   |   |   |
| CC[C@H]([C@H]1O[C@@](CC)(C[C@H]1C)[C@H]2   |   | 1 |   |   |
| CCN(CC)c1ccc(cc1)N=Nc2ccc(cc2)[N+](=       | 1 |   |   |   |
| CC(=O)N(CC(O)CO)c1c(I)c(C(=O)NCCO)c        | 0 |   | 0 |   |
| ClC(CBr)CBr                                | 1 |   |   |   |
| CCCC(=O)O[C@@]1(CC[C@H]2[C@@H]3CCCC4=CC(=C |   |   | 0 |   |
| COC(=O)c1ccc(\C=N\n2nnc3c4ccccc4nc:        | 1 |   |   |   |
| c1c[nH]cn1                                 | 0 |   | 0 |   |
| CO[C@]12[C@H]3N[C@H]3CN1C4=C([C            | 1 |   |   |   |
| CCCCC1C(CC(=O)OC)CCC1=O                    |   |   | 0 |   |
| CN([C@@H]:                                 | 0 | 0 |   |   |
| CN1CCC(CN2c3ccccc3Sc4ccccc24)C1            | 0 |   |   |   |
| CC(=CCC\C(=C\C\C=C(/C)\C=C)\C)C            |   |   | 0 |   |
| Nc1c2ccccc2nc3ccc(Br)cc13                  | 1 |   |   |   |
| COc1cccc(CN(C)N=O)c1                       | 1 |   |   |   |
| CCC(C)c1cc(cc(c1O)[N+](=O)[O-])[N+](=      | 0 |   |   |   |
| [O-][N+](=O)c1ccc2c(c1)c3nc4ccccc4c5c      | 1 |   |   |   |
| CCCc1nc(c(C                                | 0 | 0 |   |   |
| CCOC(C)OCC\C=C/CC                          |   |   | 0 |   |
| Cc1c(c2ccccc2c3ccc4ccccc4c13)[N+](=O       | 1 |   |   |   |
| CCNC(C)Cc1cccc(c1)C(F)(F                   | 0 |   |   |   |
| NNc1cccc1                                  | 0 | 0 | 1 | 0 |
| CCCCCCCCCO                                 | 0 |   |   | 0 |
| [O-][N+](=O)c1cc2cccc3c4ccccc4c(c1[N       | 1 |   |   |   |
| CC(C)CN(C[C@@H])(OP(=C                     | 0 |   |   |   |
| CC1=CC(=O)C=CC1=O                          | 0 |   |   |   |
| c1ccc(cc1)c2ccccc2c3ccccc3                 | 0 |   |   |   |
| Clc1cccc1c2onc(n2)c3ccn                    | 0 |   |   | 0 |
| CCC(C(=O)NC                                | 0 | 0 |   | 0 |
| OCCN1CC1                                   |   |   | 1 |   |
| CCN(CC)CCO[C@H]1CC[C@]2(C)[C@H]3CC[C@@]4(C |   |   |   | 0 |
| Cc1c(C)c2c3C4OC4C(O)C(O)c3ccc2c5ccc        | 1 |   |   |   |
| OS(=O)(=O)Oc1c2ccccc2c3ccc4cccc5ccc        | 0 |   |   |   |
| Cc1cnc2cc3nc(N)n(C)c3c(C)c2n1              | 1 |   |   |   |
| OC(C(=O)c1c                                | 0 | 0 | 0 | 0 |
| CCCN1cc2CC3C(C=C(C)CN3C)c4cccc1c24         | 1 |   |   |   |
| CC(C)NCC(O)c1ccc(cc1)N(=O)=O               |   |   |   | 0 |
| Cc1cccc(C)c1O                              | 0 |   |   | 0 |
| CC(=O)OC1C(C)(C)C2CCC1(C)C2                |   |   |   | 0 |
| COC(=C1[C@H](C(=C(C)N=C1C)C(=O)OC          | 0 |   |   |   |
| OCCOCCO                                    | 0 |   |   | 0 |
| O=C1CCCN1                                  |   |   |   | 0 |

|                                             |   |   |   |
|---------------------------------------------|---|---|---|
| CCOC(=O)C(=                                 | 0 | 0 |   |
| O=C(N[C@@H]1C[C@@H]1c2ccccc2)[C@@H]3CCC(=O) |   |   | 0 |
| CC(C)(C)NC(=                                | 0 | 0 |   |
| NC(=O)CCCCn1ccc(\N=C/I                      |   | 0 |   |
| CCc1ccc(C)cc1                               |   |   | 0 |
| CCC[C@@H]1O[C@@H]2C[C@H]3[C@@H]4CCCC5=CC    |   |   | 0 |
| NC(=N)c1ccc(OCCCOc2ccc(cc2)C(=N)N)cc1       |   |   | 0 |
| Oc1ccc(N=Nc2ccc(cc2)[N+](=O)[O-])c(C        |   | 0 |   |
| Clc1ccc(cc1Cl)c2ccc(Cl)c(Cl)c2Cl            |   | 0 |   |
| CC1(C)CC(O)CC(C)(C)N1[O]                    |   |   | 0 |
| OCC1OC(C(O)C1O)n2cnc3c(NO)ncnc23            |   | 1 |   |
| CCSC(=O)Cl                                  |   | 0 | 0 |
| CC(=CCC\C(=C)\CC\C(=C)\C(=O)OCC(=O)C        |   | 0 |   |
| O=C1CCCCCCCCCCCC(=O)OCCO1                   |   | 0 | 0 |
| Clc1ccc(cc1Cl)N=Nc2ccc(Cl)c(Cl)c2           |   | 0 |   |
| CC(=O)Nc1cc                                 | 0 | 0 | 0 |
| Oc1ccc(cc1)C                                | 0 | 0 | 1 |
| O=C1C=CC(=N#N)C=C1                          |   | 1 |   |
| Cc1cccc(Nc2ccccc2)c1                        |   |   | 1 |
| COc1cc2c(CC3N(C)CCc4cc(                     |   | 1 |   |
| Cc1ccc(cc1)C(=O)c2cc(O)c(O)c(c2)N(=O        |   | 0 | 1 |
| C[C@@H]1Cl                                  | 0 |   |   |
| C(COCC1CO1)OCC2CO2                          |   | 1 | 0 |
| [O-][N+](=O)c1ccc2ccc3cccc4c5CCCCc5c        |   | 1 |   |
| CN1C2CCC1CC(C2)OC(c3cc                      |   | 1 |   |
| C[C@H](NC[C@H](O)CP(=                       |   | 0 |   |
| NC(CCC(=O)C                                 | 0 | 0 | 0 |
| CC(=Nc1ccc(cc1)C(=O)C=Cc2ccccc2)O           |   | 0 |   |
| Oc1ccc2ccccc2c1N=O                          |   | 0 |   |
| O=N(=O)c1ccc2cc(c3ccc(cc3c2c1)N(=O)         |   | 1 |   |
| CC(C)C[C@H](NC(=O)[C@                       |   | 0 |   |
| Nc1ccc(Cc2ccc(N)c(c2)C(=O)O)cc1C(=O)        |   | 0 |   |
| CC(C)(N)Cc1c                                | 0 | 0 |   |
| C[C@]12CCC                                  | 0 | 0 | 0 |
| Oc1cccc(c1)C2=CC(=O)c3c                     |   | 0 |   |
| CCN(CC)C(=S                                 | 0 | 0 | 0 |
| c1ccc2cc3c4ccccc4c5ccccc5c3cc2c1            |   | 1 |   |
| [O-][N+](=O)c1ccc2ccc3c4ccccc4[n+](C        |   | 1 |   |
| CCN(CC)C=O                                  |   |   | 0 |
| CS                                          |   | 0 | 0 |
| CC(=O)Nc1ccc2ncccc2c1                       |   | 1 |   |
| Fc1cccc(\C=C                                | 0 | 0 | 0 |
| N[C@@H](CCP(=O)(O)O)C                       |   | 0 |   |



|                                             |   |   |   |
|---------------------------------------------|---|---|---|
| CCc1ccc(NC(=O)c2csc(c2)[N+](=O)[O-])c1      | 1 |   |   |
| CCN(Cc1ccccc1)c2ccccc2                      | 0 |   |   |
| CCN(CC)c1ccc2C=C(C(=O)Oc2c1)c3nc4cc         | 0 |   |   |
| Nc1ccc(N)cc:                                | 0 | 0 | 1 |
| ONC(=O)CS(=O)                               | 0 |   | 0 |
| Nc1ccc(cc1)C(=O)OCCOC(=O)c2ccc(N)c1         | 0 |   |   |
| CCCC[C@]1(C)CC1                             | 0 | 0 |   |
| OC1C=Cc2c(cc3ccccc3c2N(=O)=O)C1O            | 1 |   |   |
| OS(=O)(=O)OCc1c2ccccc2c3ccc4cccc5cc         | 1 |   |   |
| C[S+](=O)([O-])c1ccc(cc1)C1=CC=CC=C1        | 0 |   |   |
| Clc1ccc(CN2CCS/C/2=N\C#N)cn1                |   |   | 0 |
| CC(C)COS(=O)(=O)c1ccccc1                    | 1 |   |   |
| C1CC=CCCC=C1                                |   |   | 0 |
| CCOC(=O)Nc1ccc(NC2CCCC2)cc1                 | 0 |   | 0 |
| CNCC(O)c1ccc(O)cc1                          |   |   | 0 |
| COC(=O)CCCC(=O)OC                           | 0 |   | 0 |
| Clc1ccc2C(=O)c3ccccc3C(=O)c2c1              |   |   | 0 |
| Clc1cccc(N2C=CC=CC=C2)c1                    | 1 | 0 |   |
| C=Cc1ccccc1                                 | 0 |   | 0 |
| CC(C)C1=CCC(=CC1)C                          |   |   | 0 |
| O=C1NC(=O)C1                                | 0 | 0 |   |
| CC(C)(c1ccccc1)c2ccc(O)c(c2)C(C)(C)c3ccccc3 |   |   | 1 |
| O1C2C1c3ccc4c5ccccc5c6cc7cccc2c7c3c         | 1 |   |   |
| COC1COC(COCC2COC(OC)C(OS(=O)=O)C1           | 0 |   |   |
| Nc1ccc(cc1N)N(=O)=O                         | 1 |   | 1 |
| CC(N)Cc1ccccc1                              | 0 |   |   |
| COP(=S)(OC)Oc1ccc(SC)c1                     | 0 | 0 | 0 |
| CC1(C)C(C=C)C1                              | 0 | 0 | 1 |
| OC1c(Cl)cc(Cl)c(Cl)c1N(=O)=O                | 0 |   |   |
| NC(=N)NCCNO[S+](O-):c1                      | 0 |   |   |
| NC(=N)Nc1ccc2[nH]c3[C@H](O)C3               | 0 |   |   |
| Nc1ncnc2c1r                                 | 0 | 0 | 0 |
| CNC(=O)O\N=C/C(C)(C)SC                      | 0 |   |   |
| O=N(=O)OCC(CON(=O)=O)ON(=O)=O               | 1 |   |   |
| o1c(nc2ccccc12)c3ccccc3                     | 0 |   |   |
| [O-][N+](=O)c1ccc(Nc2[nH]cnc3ncnc23)        | 0 |   |   |
| CC(C)(C)c1ccc1                              | 1 | 0 |   |
| Fc1ccc(Br)cc1                               |   |   | 0 |
| O=C(C=Cc1ccccc1)c2ccc(cc2)N(=O)=O           | 1 |   |   |
| CN1C(=O)N1                                  | 1 | 0 |   |
| Nc1nc(cs1)c2ccccc2                          | 1 |   | 1 |
| BrCCC(=O)N1CCN(CC1)C(=O)N1                  | 0 | 1 | 0 |
| OC(CCl)COCC=C                               |   |   | 0 |

|                                              |   |   |   |   |
|----------------------------------------------|---|---|---|---|
| CC1=CN([C@                                   | 0 | 0 |   |   |
| O=C1\C=C\2                                   | 0 | 0 |   | 1 |
| CCCCNCC(O)c                                  | 0 | 0 |   | 0 |
| CCN(CC)C(=O)N(CC)CC                          |   |   |   | 0 |
| CC1(C)C2CCC3(C2)[C@H]1C(=O)CCC3(C)C          |   |   |   | 0 |
| CCCC[N+](C)CCCC1                             |   |   |   | 0 |
| N[C@H](Cc1c[nH]cn1)C(=O                      |   | 0 |   |   |
| ClC(Cl)C(=O)Cl                               |   |   | 1 |   |
| C[C@H]1CCC\C=C\C2C[C@                        |   | 0 |   |   |
| CCOC(=O)c1c                                  | 0 | 0 |   | 0 |
| CCOc1ccc2N(c                                 | 0 | 0 | 0 | 0 |
| CC(=O)OCC(O)CO                               |   |   | 1 |   |
| CC\C=C\C=C\C=C\C=C\C=C                       |   |   | 0 |   |
| COP(=O)(OC)O\C=C\C(=O)OC(C)c1cccc            |   |   | 0 |   |
| COc1ccc(OC)                                  | 0 | 0 |   |   |
| OC(=O)c1ccc                                  | 0 | 0 | 0 | 1 |
| CC(=O)N                                      | 0 | 0 | 0 | 0 |
| COC(C1Cc2cc3cc(OC4CC(O                       |   | 0 |   |   |
| C1C[C@@H]2O[C@@H]2[C@H]1O[C@                 |   |   | 0 |   |
| COC1=CC=C2C(=CC1=O)[C(                       |   | 1 | 0 |   |
| CC1CCc2cc(F)                                 | 0 | 0 |   |   |
| Cc1cccc(C(=O)O)c1[N+](=O)[O-]                |   |   | 1 |   |
| CCCCC(CC)C(O)C#C                             |   |   |   | 0 |
| CN1CCCN=C1\C=C/c2sccc2                       |   | 0 |   |   |
| OC1=CC(=O)NC=C1Cl                            |   |   |   | 0 |
| CC(C)(C)OC(=O)c1cccc1C(=O)O                  |   |   |   | 0 |
| COc1cc(N)c(Cl)cc1C(=O)CC                     |   | 0 |   |   |
| OC1=c2c(O)cc3cccc4ccc(c2c34)C56CCCC          |   |   | 1 |   |
| Nc1cccc1SCCSc2cccc2N                         |   |   | 1 |   |
| CCN(CC)c1ccc2C(=CC(=O)Oc2c1)C(F)(F)I         |   |   | 0 |   |
| CS(=O)(=O)c1ccc(cc1)[C@@H](O)[C@@H](CO)NC(=O |   |   |   | 0 |
| O(c1cccc1)c2cccc2                            |   |   | 0 | 0 |
| Fc1ccc(OCCC                                  | 1 |   |   | 1 |
| CN(C)CCOCCN(C)C                              |   |   |   | 0 |
| Oc1cccc(C[C@H]2COC(=O)[C@@H]2Cc3cccc(O)c3)c1 |   |   |   | 1 |
| c1ccc2cc3c(ccc4ccncc34)cc2c1                 |   |   | 1 |   |
| CC[C@H](C)[C@@H]1NC(=O)[C@H](Cc2ccc(O)cc2)N( |   |   |   | 0 |
| CC1(C)CC(=O)CC(C)(C)N1[O]                    |   |   |   | 0 |
| NC(CCC(=O)O)C(=O)O                           |   |   | 0 | 0 |
| C[C@@H]1O                                    | 0 |   |   |   |
| CCCCOP(=O)(O)OCCCC                           |   |   |   | 0 |
| COc1ccc(CCNC[C@H](O)c2ccc(O)cc2)cc1OC        |   |   |   | 0 |
| Nc1ccc(cc1)c2ccc(cc2)c3ccc(N)cc3             |   |   | 1 |   |

|                                                  |   |   |   |   |
|--------------------------------------------------|---|---|---|---|
| COc1cc(Cc2c                                      | 0 | 0 | 0 | 0 |
| CC1(C)[C@@H]2CC[C@@]1(C)[C@H](O)C2               |   |   |   | 0 |
| CCNC(=O)[C@@H]1CCCN1C(=O)[C@H](CCCNC(=N)N)       |   |   |   | 0 |
| [S-]c1cccc1                                      |   |   |   | 0 |
| COc1cc(C[C@@H](C)N)c(OC)cc1C                     |   |   |   | 0 |
| Cc1ccc(cc1)C                                     | 0 | 0 |   | 0 |
| O=C1c2cccc2C(=O)c3c1ccc4c3[nH]c5c6               |   |   | 0 |   |
| NC(=O)C(Br)(Br)C#N                               |   |   |   | 0 |
| CN1C2CCCC1CC(C2)NC(=O)                           |   | 0 |   |   |
| CN(C)CCc1c[nH]c2ccc(C[S+                         |   | 0 |   |   |
| COc1ccc(OC)cc1                                   |   |   | 0 | 0 |
| COC(=O)C1OC1c2cccc2                              |   |   | 1 |   |
| NC(CCC(=O)NC(CSC(=C(Cl)Cl)Cl)C(=O)N(             |   |   | 1 |   |
| COc1ccc(cc1N=Nc2c(O)c(cc3cccc23)C(-              |   |   | 1 |   |
| Cc1cccc2cccnc12                                  |   |   | 1 | 0 |
| Cc1ccc(cc1)[S+](=O)([O-])                        |   | 0 |   |   |
| CCN(O)CC                                         |   |   |   | 0 |
| OCC(Cl)(Cl)Cl                                    |   |   | 1 |   |
| CC1CS(=O)(=O)CCN1\N=C\c2oc(cc2)N(=O)=O           |   |   |   | 0 |
| CC1(CO1)C(=O)Nc2cccc2                            |   |   | 1 |   |
| Oc1ccc2C[C@H]3N(CC=C)(                           |   | 0 |   |   |
| NC(=N)c1ccc(C=Cc2ccc(cc2O)C(=N)N)cc1             |   |   |   | 1 |
| CN(C)CCCN                                        |   |   | 0 | 0 |
| Nc1ccc(cc1)[S+](=O)([O-])                        |   | 0 |   |   |
| COc1ccc(cc1)C(=O)Nc2nc3cccc3c(NCc4cccc4)c2C#N    |   |   |   | 1 |
| CC(O)CN1CCN(CC(=O)[O-])CCN(CC(=O)[O-])CCN(CC(=   |   |   |   | 0 |
| CCCCCc1ccc                                       | 0 | 0 | 0 | 1 |
| N[C@@H]1CC[C@@H](N)CC1                           |   |   | 0 |   |
| COc1ccc2CN(C)CC[C@@]3                            |   | 0 |   |   |
| OC(COc1cccc2OC(=CC(=O)c12)C(=O)[O-])COc3cccc4C   |   |   |   | 0 |
| CC(O)CC(C)O                                      |   |   |   | 0 |
| CCCCN1C[C@H](O)[C@@H](O)[C@H](O)[C@H]1CO         |   |   |   | 0 |
| ClCC1(CCl)C2CC(Cl)(Cl)C1(CCl)C(Cl)C2Cl           |   |   | 0 |   |
| CCCCCCCCCCCCCCCC1=NCCN1CCO                       |   |   | 0 |   |
| Cc1ccc2c(Cl)cc(Cl)c(O)c2n1                       |   |   |   | 1 |
| O=Cc1oc2cccc2c1                                  |   |   |   | 0 |
| Cn1cnc(c2cccc2)c1N=O                             |   |   | 1 |   |
| OCCc1cccc1N(=O)=O                                |   |   | 1 | 0 |
| Oc1c(Cl)c(Cl)c(Cl)c(Cl)c1Cl                      |   |   | 0 | 1 |
| CC(=O)CC(=O)CCC(=O)O                             |   |   | 0 |   |
| Cc1cc2cc3cccc3cc2c4cccc14                        |   |   | 1 |   |
| CC(C)Cc1ccc(CCc2cc3C(=NC(C)c4nnc(C)n4c3s2)c5cccc |   |   |   | 1 |
| OC1C=CC2OC2C1O                                   |   |   | 1 |   |

|                                                                       |   |   |   |
|-----------------------------------------------------------------------|---|---|---|
| <chem>[O-][N+](=O)c1ccc(SC#N)c(c1)[N+](=O)</chem>                     | 1 |   |   |
| <chem>CC(C)c1cc(N)cc(c1N)[N+](=O)[O-]</chem>                          | 0 |   |   |
| <chem>Clc1ccc(Oc2ccc(NC=O)cc2)cc1</chem>                              | 1 |   |   |
| <chem>OC[C@H]1O[C@](O)(CO)[C@@H](O)[C@@H]1O</chem>                    |   |   | 0 |
| <chem>NC(Cc1cc(O)C1)C1</chem>                                         | 0 | 0 |   |
| <chem>ClC[C@]1(C(Cl)Cl)[C@@H]2CC(Cl)(Cl)[C@H]2C1</chem>               | 1 |   |   |
| <chem>COP(=O)(C)OC</chem>                                             | 0 |   | 0 |
| <chem>CC(C)CN(C)c1</chem>                                             | 1 |   |   |
| <chem>[O-]C(=O)CO</chem>                                              | 0 | 0 | 0 |
| <chem>CC1(C)S[C@@H]2[C@H](N)C(=O)N[C@@H]1C2</chem>                    |   | 0 |   |
| <chem>CC(=O)N[C@H]1C=CC1</chem>                                       | 0 | 0 | 0 |
| <chem>Clc1ccc(Cn2cnc2)cc1</chem>                                      | 1 | 1 | 0 |
| <chem>Sc1ncnc2[nH]cnc12</chem>                                        | 0 | 1 |   |
| <chem>C(CN)Cc1cccc1</chem>                                            | 0 |   |   |
| <chem>O1C2C1c3ccc4ccccc4c3c5ccccc25</chem>                            | 1 |   |   |
| <chem>CC(C)CC(C)N(c1cccc1)c2ccc(N)cc2</chem>                          |   |   | 1 |
| <chem>OC(=O)CCCCl</chem>                                              | 0 | 0 | 0 |
| <chem>CC(C)COC(=O)Cc1cccc1</chem>                                     | 0 |   |   |
| <chem>NC1=NC(=O)N(C=C1)C2OC(COP(=O)(O)OC)C2</chem>                    | 0 |   |   |
| <chem>N#Cc1cccc1</chem>                                               | 0 |   | 0 |
| <chem>Oc1ccc(\C=C)cc1</chem>                                          | 0 | 0 | 1 |
| <chem>OC(=O)CCC(=O)C</chem>                                           | 0 | 0 | 0 |
| <chem>CC1CCC23CCC(=O)C2C1(C)C(CC(C)(C=C)C(O)C3C)OC(=O)C1</chem>       |   |   | 0 |
| <chem>NS(=O)(=O)O</chem>                                              |   |   | 0 |
| <chem>COc1cc2CCN(C)[C@H]3Cc4ccc(Oc5cc(C)cc5)cc4c2</chem>              | 1 |   |   |
| <chem>CC1=Cc2nc3c(ccc4ccccc34)c(C)c2C(O)C1</chem>                     | 1 |   |   |
| <chem>C[C@]12CC[C@H]3[C@@H](CC[C@H]4C(=O)N[C@@H](C)C4)C[C@H]12</chem> | 1 |   |   |
| <chem>N[C@H](Cc1ccc(O)cc1)C1</chem>                                   | 0 | 1 |   |
| <chem>Oc1c(cc(c(O)c1N(=O)=O)N(=O)=O)N(=O)=O</chem>                    | 0 |   |   |
| <chem>CO[C@]12[C@@H](O)C[C@H](O)C1</chem>                             | 0 | 0 |   |
| <chem>CCCCOCCOCCOCCOCCO</chem>                                        |   |   | 0 |
| <chem>N#Cc1ccccn1</chem>                                              |   |   | 0 |
| <chem>CC(=O)O[C@H]1C=CC1</chem>                                       | 0 |   |   |
| <chem>C1CCC(CC1)SSC2CCCCC2</chem>                                     |   |   | 0 |
| <chem>Clc1cccc(C=O)c1Cl</chem>                                        | 0 |   |   |
| <chem>OC(=O)c1cccc(C(=O)O)c1C(=O)O</chem>                             |   |   | 0 |
| <chem>COc1ccc2[nH]c(c(CCNC(=O)C)cc2)cc1</chem>                        | 0 |   |   |
| <chem>Fc1ccc(CN2C3C2c4ccccc4c5ccccc35)cc1</chem>                      | 1 |   |   |
| <chem>COc1cccc1NC(=O)c2csc(c2)[N+](=O)[O-]</chem>                     | 1 |   |   |
| <chem>CC(CN)CC(=O)C</chem>                                            | 0 | 0 | 0 |
| <chem>[O-][N+](=O)c1ccc2C=Cc3ccccc1c23</chem>                         | 1 |   |   |
| <chem>Cc1cc2nc3cc(C)c(N)cc3[n+](c4ccccc4)c2</chem>                    | 1 |   |   |
| <chem>CC(C)c1cc(cc(c1)C(C)C)C(C)C</chem>                              |   |   | 0 |

|                                                   |   |   |   |   |
|---------------------------------------------------|---|---|---|---|
| CCOP(=S)(OCC)SCSc1ccc(Cl)cc1                      |   |   |   | 0 |
| Clc1ccc(CO[C                                      | 1 | 0 |   |   |
| O[C@@H]1[C@H](O)[C@@H](O)[C@H](O)[C@@H](          |   |   |   | 0 |
| COc1ccc2c(OC)c3ccoc3nc2                           |   | 0 |   |   |
| OCc1ccc(Cl)cc1                                    |   |   | 0 |   |
| CC(C)CCCC(C)                                      | 0 | 0 |   | 0 |
| OC(=O)c1cc(                                       | 0 |   | 0 | 0 |
| NC(=O)N[C@@H](CCC(=O)O)C(=O)O                     |   |   |   | 0 |
| CCCC[S+](=N)([O-])CC[C@                           |   | 0 |   |   |
| Cn1ccc2c1ccc3ccc4ccc(O)cc4c23                     |   |   | 1 |   |
| CC(C)NC(C)C                                       | 0 | 0 | 0 | 0 |
| COC(=O)[C@H]1[C@@H](                              |   | 0 |   | 0 |
| OC(=O)CBr                                         |   |   | 1 | 0 |
| CCCCN(N=O)\C(=N\O)\C=O                            |   |   | 1 |   |
| CN1CCC(=CC1)c2ccccc2                              |   |   | 0 |   |
| C[C@H]1C[C@H]2OC(=O)C(=C)[C@H]2C                  |   |   | 1 |   |
| Cc1ccc(c(N)c1)[N+](=O)[O-]                        |   |   | 0 |   |
| Oc1c(cccc1[N+](=O)[O-])c2ccccc2                   |   |   | 0 |   |
| OC1C=Cc2c(ccc3ccccc23)C1O                         |   |   | 1 |   |
| [O-]C(=O)C(Cl)Cl                                  |   |   |   | 0 |
| Nc1c(N=Nc2ccc(cc2)[N+](=O)[O-])c(cc3              |   |   | 1 |   |
| CCc1cc(Cc2cc(CC)cc(c2O)C(C)(C)C)c(O)c(c1)C(C)(C)C |   |   |   | 1 |
| C[C@@H](O)[C@H](N)C(=O)O                          |   |   |   | 0 |
| OCC1SCCN1N=O                                      |   |   | 1 |   |
| CCNC(=O)CCC(N)C(=O)O                              |   |   | 0 |   |
| C[C@@](N)(C(=O)O)c1ccc                            |   | 0 |   |   |
| O=N(=O)c1cccc2cnc12                               |   |   | 1 |   |
| CCCCCCCCC                                         | 0 | 0 |   | 0 |
| C[C@@H](O)CN(C[C@@H](C)O)N=O                      |   |   | 1 |   |
| CCCC(O)C(CC                                       | 0 | 0 | 0 | 0 |
| CC(C)(C)CC(C)(C)N                                 |   |   |   | 0 |
| CN(Cc1ccc(cc1)[N+](=O)[O-])N=O                    |   |   | 1 |   |
| CCCCCCCCCCCCOC(=O)C(=C)C                          |   |   |   | 0 |
| CCc1ccc(O)cc1                                     |   |   |   | 0 |
| CCCCCCCCC                                         | 0 | 0 |   | 0 |
| CCCCCOC(=O)CCCCCCC(=O)OCCCCC                      |   |   |   | 0 |
| Oc1cccc2Oc3cc4OC5OCCC5c4c(O)c3C(=                 |   |   | 0 |   |
| CC(O)C1NC(=                                       | 0 | 0 |   |   |
| CN1C[C@@H                                         | 0 | 0 |   |   |
| O[C@@H]1C[C@](O)(C[C@@H](OC(=O)C=Cc2ccc(O)        |   |   |   | 0 |
| CC1CN=C(O)N1c2ncc(s2)N(=O)=O                      |   |   | 1 |   |
| [NH-]C(=O)c1cc[n+](COC[NH+]2C=CC=C                |   |   | 0 |   |
| CCOC(=O)Nc                                        | 0 | 0 |   |   |

|                                                            |   |   |   |   |
|------------------------------------------------------------|---|---|---|---|
| <chem>Fc1ccc2ncccc2c1F</chem>                              |   |   | 1 |   |
| <chem>OC(=O)CN1c:</chem>                                   | 0 | 0 |   | 0 |
| <chem>CCCCCOC(=O)c1ccc(O)cc1</chem>                        |   |   |   | 1 |
| <chem>COC(F)(F)C(C</chem>                                  | 0 | 0 | 0 | 0 |
| <chem>CC(=O)OC[C@H]1O[C@@H](O[C@H]2[C@H](O)[C@H]</chem>    |   |   |   | 0 |
| <chem>BrCCCCCBr</chem>                                     |   |   | 1 | 0 |
| <chem>CC(=O)CCC(=O)C</chem>                                |   |   | 0 | 0 |
| <chem>ClCCOC(=O)Cl</chem>                                  |   |   | 0 |   |
| <chem>COC(=O)C1=C(C)NC(=C([C@@H]1c2cccc(c2)N(=O)=O</chem>  |   |   |   | 1 |
| <chem>OC(=O)Cc1cccc1[N+](=O)[O-]</chem>                    |   |   | 1 |   |
| <chem>Cc1ccc(cc1N=O)N(=O)=O</chem>                         |   |   | 1 |   |
| <chem>CCOC(=O)[C@@H]1O[C@]1(C)c2cccc2</chem>               |   |   | 0 |   |
| <chem>CCC(Cl)CCl</chem>                                    |   |   |   | 0 |
| <chem>NC(Cc1ccc(cc1)N(CCCl)CCC</chem>                      | 0 |   | 1 |   |
| <chem>COc1cc2CCN</chem>                                    | 1 | 0 |   | 0 |
| <chem>Cc1cc(ccc1N:</chem>                                  | 0 | 0 |   |   |
| <chem>CC(O)(c1ccc(Cl)cc1)c2ccc(Cl)cc2</chem>               |   |   |   | 1 |
| <chem>CC[C@]1(CCC(=O)NC1=O)c</chem>                        |   | 0 |   |   |
| <chem>Nc1nc(N)nc(n1)c2cccc2</chem>                         |   |   |   | 0 |
| <chem>Nc1c(CC(=O)[O-])cccc1C(=O)c2cccc2</chem>             |   |   |   | 0 |
| <chem>COc1cc2c(Nc3ccc(Br)cc3F)ncnc2cc1OCC4CCN(C)CC4</chem> |   |   |   | 0 |
| <chem>Oc1c(cc(cc1N(=O)=O)N(=O)=O)N(=O)=O</chem>            |   |   | 1 |   |
| <chem>CC(=O)Nc1cc</chem>                                   | 1 | 0 |   | 1 |
| <chem>Cn1c(N)nc2c1ccc3nc(c4cccc4)c(nc23)c!</chem>          |   |   | 0 |   |
| <chem>C1=Cc2c3ccc4cccc4c3cc5cccc1c25</chem>                |   |   | 1 |   |
| <chem>CC(C)OC(=O)</chem>                                   | 0 | 0 |   | 1 |
| <chem>C[C@H]1N2C</chem>                                    | 0 | 0 |   | 0 |
| <chem>CCOP(=O)(OCC)C(C)NC(=O)N(CCCl)N=O</chem>             |   |   | 1 |   |
| <chem>CCCN1CCC[C@@H]2Cc3nc</chem>                          |   | 0 |   | 0 |
| <chem>CN(C)S(=O)(:</chem>                                  | 1 |   |   |   |
| <chem>O=S1(=O)c2cccc3ccc4c5cccc5cc1c4c23</chem>            |   |   | 1 |   |
| <chem>CCOC1=CC(N(O)c2cccc12)(c3cccc3)c4</chem>             |   |   | 0 |   |
| <chem>CC(O)CN(CC(C)O)CC(C)O</chem>                         |   |   | 0 | 0 |
| <chem>Cc1cccc2nc(O)c(O)nc12</chem>                         |   |   | 1 |   |
| <chem>CCOC(=O)C1=C[C@@]2(C</chem>                          |   | 0 |   |   |
| <chem>CC(C)OC(=O)CCl</chem>                                |   |   | 0 |   |
| <chem>OCCNC(=O)C</chem>                                    | 0 | 0 |   |   |
| <chem>CC(C)CC(=O)C</chem>                                  |   |   | 0 | 0 |
| <chem>OC[C@H]1O </chem>                                    | 0 |   |   |   |
| <chem>CC(Cl)CO</chem>                                      |   |   | 1 |   |
| <chem>CN(C)[C@H]:</chem>                                   | 0 | 0 |   |   |
| <chem>N=C1NC(=N)c2cc3cccc3cc12</chem>                      |   |   |   | 1 |
| <chem>CS(=O)(=O)Nc1ccc(Nc2c3ccc(cc3nc4cc(</chem>           |   |   | 1 |   |

|                                                     |   |   |   |
|-----------------------------------------------------|---|---|---|
| Oc1ccc2c(c1)c3cccc3c4cc5cccc5cc24                   | 1 |   |   |
| CC(=CCC\C(=O)C)C(=O)C                               | 0 | 0 | 0 |
| CC(=O)\C=C/c1ccc2OCOC2c1                            |   | 0 |   |
| COC(=O)c1cccc1OC                                    |   |   | 0 |
| O=C(NCCCN1CCCCC1)C(C)C                              | 1 |   |   |
| Clc1cccc1C=O                                        |   | 0 | 0 |
| Cc1nc2c(C)c(C)c3c(nc(N)n3C)c2nc1C                   |   | 1 |   |
| OC(=O)[C@H](Cc1ccc(O)c1)C(=O)O                      | 0 |   |   |
| COc1cc2OC3(C)OC4OC4C3(C)c2c5OC(=C)C                 |   | 0 |   |
| CS1ccc2Sc3c(C)cc(C)cc32                             | 1 |   |   |
| CCCCCCCCCCCCn1cc[n+](C)c1                           |   |   | 1 |
| CC1OC(CC(N)C1O)OC2CC(O)(Cc3c(O)c4c(O)cc34)C1        |   | 1 |   |
| Cc1cccc1N=Nc2cc(C)c(N)cc2N                          |   | 1 |   |
| CNC1CC(N)[C@H](O)C1                                 | 0 | 0 |   |
| COc1c2ccoc2[n+](O)c3cccc13                          |   | 0 |   |
| ClCc1c2cccc2cc3cccc13                               |   | 1 |   |
| C[C@H]1CC2C3CCC4=CC(=O)C3CC21                       | 0 |   |   |
| CCCN(CC[C@H](C)O)N=O                                |   | 1 |   |
| CN(C)c1ccc(Cn2cnc3CN([C@H]1)C)cc1                   | 0 |   |   |
| ClC(=C)C=O                                          |   | 1 |   |
| CCN1\C=C\C=C\C2ccc3ccc(C)cc13                       | 0 |   |   |
| CCC(O)C=CC=CC=CC=CC=O                               |   | 1 |   |
| CCCCOCCOCCO                                         |   | 0 | 0 |
| CN(C)CCCNc1c2cccc2nc3cccc(c13)[N+](=O)[O-]          |   | 1 |   |
| CN=[N+](C)[O-]                                      |   | 1 |   |
| CC(C)(C(=O)C)C(=O)C                                 | 0 | 0 | 0 |
| CN1C2CCC1CC(C2)OC(=O)C                              |   | 0 |   |
| CCCC(C)CC                                           |   |   | 0 |
| COCC(=O)Nc1c(I)c(C(=O)NCC(O)CO)c(I)c(C(=O)N(C)C)cc1 |   |   | 0 |
| CCCCCCCCC(C)C                                       | 0 |   |   |
| C1CN(CCO1)S                                         | 0 | 0 | 0 |
| COc1ccc(CC2CO2)cc1                                  |   | 1 |   |
| [O-][N+](=O)c1ccc2ccc3c4cccc4nc5ccc(C)cc15          |   | 1 |   |
| CCCC(CC)COC(=O)CS                                   |   |   | 0 |
| Fc1ccc2ncccc2c1                                     |   | 1 |   |
| CN1CCCC1                                            |   |   | 0 |
| CCCc1cc(ccn1)C(=S)N                                 | 0 |   | 0 |
| CCCN(C[C@H](O)CC)N=O                                |   | 1 |   |
| CC(=O)NCCc1c(Cc2cccc2)cc1                           | 0 |   |   |
| COc1ccc(cc1)C2=C(O)C(=O)C2                          | 0 |   |   |
| Cc1ccc(cc1)[S+](=O)([O-])C                          | 0 |   |   |
| CC(C)C[C@H]1N2C(=O)C(=O)N12                         | 0 |   |   |
| CCOC(=O)C(=O)C                                      |   | 0 |   |

|                                              |   |   |   |   |
|----------------------------------------------|---|---|---|---|
| CC(C)[C@@H]1CC[C@@H](C)CC1                   | 0 |   |   |   |
| Cc1oc(C=O)cc1                                | 0 |   |   |   |
| C\C=C(/C)\C(=O)OC1CCN2CC=C(CO)C12            | 0 |   |   |   |
| COc1nsc2cc(N)ccc12                           | 1 |   |   |   |
| ONc1cccc(c1)c2ccccc2                         | 0 |   |   |   |
| CN(C)C(=O)N                                  | 0 | 0 |   |   |
| ONc1ccc(cc1)[N+](=O)[O-]                     | 1 |   |   |   |
| CCCC(CC)COS(=O)(=O)O                         | 0 |   |   |   |
| Oc1ccc(cc1C(                                 | 0 | 0 | 0 |   |
| CCN[C@@H]1C[C@H](N)[C@@H](OC2OC(=CCC2N)C     |   |   | 0 |   |
| O[C@@H]1C=Cc2c(cc3ccc4c(ccc5ccc2c3           | 1 |   |   |   |
| CN(C(=O)C)c1snc2ccccc12                      | 0 |   |   |   |
| CC(C)(C)C1=CC(=O)C=CC1=O                     | 1 |   |   |   |
| CCOC(=O)C(F)(F)F                             |   |   | 0 |   |
| CCN(CC)C(=C                                  | 0 | 0 | 0 |   |
| CCCC(C)CO                                    |   |   | 0 |   |
| C[C@H]1CN(CCN1N=O)N=O                        | 1 |   |   |   |
| O=CCC=O                                      | 1 |   |   |   |
| CCCCCN(N=O)C(=O)N                            | 1 |   |   |   |
| Cc1cc(N)ccc1NOS(=O)(=O)O                     | 1 |   |   |   |
| NC(Cc1ccc(O)c(c1)[N+](=O)[O-])C(=O)C         | 0 |   |   |   |
| S(Sc1nc2cccc                                 | 0 | 0 | 1 | 0 |
| CCCCOC(=O)COc1cc(Cl)c(Cl)cc1Cl               | 0 |   |   |   |
| CC(C)(C)c1c(N)ccc2ccccc12                    | 0 |   |   |   |
| COc1cccc(c1)C(=O)NCCN2                       |   | 0 |   |   |
| Clc1ccc(CC[C@H]2CO2)cc1                      | 1 |   |   |   |
| COc1ccc2Sc3                                  | 1 | 1 |   |   |
| CC(C)(Oc1ccc                                 | 0 | 0 | 0 | 0 |
| C(C(C1CCCCC1)C2CCCCC2)[C@H]3CCCCN            | 0 |   |   |   |
| CCc1cccc2c3CCOC(C)(CC)c3[nH]c12              | 0 |   |   |   |
| COc1ccc2c(c:                                 | 0 | 0 |   |   |
| O[C@@H]1C[C@](C[C@@H])(OC(=O)C=Cc2ccc(O)c(O  |   |   |   | 0 |
| CCCCCCCCC(=O)OCCN1CCN(CCCN2c3cc              | 0 |   |   |   |
| CN(C)CCNCCN(C)C                              |   |   |   | 0 |
| Cc1cccc1c2ccc(N)cc2                          | 1 |   |   |   |
| CC(C(=O)O)c:                                 | 0 | 0 |   | 0 |
| OC(=O)[C@H](OC(=O)\C=C\c1ccc(O)c(O)c1)[C@@H] |   |   |   | 0 |
| COc1ccc(\C=C\C)c(OC)c1                       | 0 |   |   |   |
| CNP(=O)(OC)Oc1ccc(cc1Cl)C(C)(C)C             |   |   |   | 0 |
| CCCCCCCCSC(=O)Oc1cc(Cl)nnc1c2ccccc2          |   |   |   | 1 |
| CC(=O)Nc1cc2Cc3ccccc3c2cc1OC(=O)c4           | 0 |   |   |   |
| O=C1C=CC=C2C3CNCC(C3)                        |   | 0 |   |   |
| Clc1ccc(cc1)(                                | 0 | 0 |   | 0 |



|                                                |   |   |   |   |
|------------------------------------------------|---|---|---|---|
| CCCCCCCC[N+](C)(CCCCCCCC)CCCCCCCC              |   |   |   | 1 |
| OCCOc1cccc                                     | 0 | 0 | 0 | 0 |
| CC(C)(C)c1ccc(cc1)c2ccc(NO)cc2                 |   |   | 1 |   |
| C[C@@H]1O[C@@H]1C                              |   |   | 1 |   |
| CNC1=C2CC(=O)C(=CC=C2c3c(CC1)cc(OC             |   |   | 0 |   |
| CC(Br)C(=O)N                                   |   |   | 1 |   |
| COC(=O)C1=(                                    | 0 | 0 |   |   |
| Clc1cccc(c1)N(=O)=O                            |   |   | 0 | 0 |
| CN(C)C(=N)N(C)C                                |   |   | 0 |   |
| CCCCCCCC(CO)CCCCC                              |   |   |   | 0 |
| CCCCC\C=C/C\C=C/C\C=C/C/                       |   | 0 |   |   |
| COc1ccc(cc1OC)[S+](=O)([                       |   | 0 |   |   |
| O=C(c1ccc2C(=O)OC(=O)c2c1)c3ccc4C(=O)OC(=O)c4c |   |   |   | 0 |
| Cc1cc(O)c2C:                                   | 0 | 0 |   |   |
| CC(=O)ON(C(=O)C)c1ccc2c(Cc3cccc23)             |   |   | 1 |   |
| Nc1ccc(O)c(c1)N(=O)=O                          |   |   | 1 | 1 |
| CC(=O)Nc1ccc(cc1)S(=O)(=O)c2ccc(NC(=           |   |   | 0 |   |
| CC1(O)C=Cc2cc3c(ccc4cccc34)c5CCC1(C            |   |   | 1 |   |
| CC(I)C1OCC(CO)O1                               |   |   | 1 |   |
| CCN1CCN=N1                                     |   |   | 1 |   |
| c1ccc2c(c1)ccc3cc4cnccc4cc23                   |   |   | 1 |   |
| COC(=O)CC(C)(C)C=C                             |   |   |   | 0 |
| CCCCCCCCCCCCCCCC(=O)OC[C@H](COP(=O)([O-])OCC   |   |   |   | 0 |
| OC(=O)c1cccc1[N+](=O)[O-]                      |   |   | 1 |   |
| ON(=O)=C(Cl)Cl                                 |   |   | 1 |   |
| C\C=C\C                                        |   |   | 0 |   |
| CC(O)CBr                                       |   |   | 1 |   |
| CN(C)CCN(C)N=O                                 |   |   | 1 |   |
| Cc1ccc(cc1C)[N+](=O)[O-]                       |   |   | 1 |   |
| Cc1cccc1C(=O)N2CC\C(=N/OS(=O)(=O)[O-])\c3ccc(C |   |   |   | 0 |
| CC[C@H]1OC(=O)[C@H](C)[C@@H](O[C@H]2C[C@@H     |   |   |   | 0 |
| Cl\C=C\Cl                                      |   |   |   | 0 |
| Oc1nc(O)nc(O)n1                                |   |   |   | 0 |
| Nc1ccc(c2ccc(N)cc2S(=O)(=O)O)c(c1)S(           |   | 0 |   |   |
| COC(=O)C[C@                                    | 0 | 0 |   |   |
| OC(=O)CCCOc1ccc(Cl)cc1Cl                       |   |   | 0 |   |
| CCCCCl                                         | 0 | 0 | 0 |   |
| CCc1cccc1                                      |   |   | 0 | 0 |
| COC(=O)\C(=C\C1oc(cc1)[N+](=O)[O-])\           |   |   | 1 |   |
| C[C@@H]1C[C@H]2[C@@H]3C[C@H](F)C4=CC(=O)C      |   |   |   | 0 |
| NC(=O)OC[C@                                    | 0 | 0 |   |   |
| CC(C)n1c\C=C=                                  | 0 | 0 |   |   |
| CCCC[N+](C                                     | 0 | 0 |   |   |

|                                                 |   |   |   |
|-------------------------------------------------|---|---|---|
| NCC(=O)NCC(=O)NCC(=O)NCC(=O)O                   | 0 |   |   |
| CCC1CCC(CCC(=O)O)C1                             |   |   | 0 |
| S=C1SCN(Cc2ccccc2)CN1C                          | 0 |   | 1 |
| COc1cc(cc(OC)c1O)[C@H]2[C@@H]3[C@H](COC3=O      |   |   | 1 |
| CN(C)OC(=O)COc1ccc(Cl)cc1Cl                     | 0 |   |   |
| OCC(CN=N#N)Cc1ccccc1                            | 1 |   |   |
| CCc1ccc(CCO                                     | 0 | 0 |   |
| BrC1cccc(c1)c2ccccc2                            | 0 |   |   |
| ClC(=O)c1ccc(cc1)N(=O)=O                        | 1 |   | 0 |
| CCOC(=O)C(Cc1ccccc1)NC(C)C(=O)N(C               | 0 |   |   |
| CNC(=O)O\N=C\C(C)(C)S(=O)C                      |   |   | 0 |
| BrCC(Br)(Br)Br                                  | 1 |   |   |
| C[N+](C)(C)C                                    | 0 | 0 |   |
| NC(=O)c1ccc(N)cc1                               | 0 |   |   |
| C[C@]12CC[C@H]3[C@@H](CC[C@H]4CC(=O)CC[C@       |   |   | 1 |
| CC[C@@H]1C[C@H](N(Cc2cc(cc(c2)C(F)(F)F)C(F)(F)F |   |   | 1 |
| CCCCCCCC=O                                      |   |   | 0 |
| [O-][N+](=O)c1ccc2c(cc3c(cccc3c2c1)[N           | 1 |   |   |
| CN(C)CCCNCCCN                                   |   |   | 0 |
| CCC(Cl)C(Cl)C(Cl)CC(Cl)C(Cl)C(C)Cl              |   |   | 1 |
| O=C(OCCN1CCCCC1)c2c[nH                          | 0 |   |   |
| CNCCCC(=O)O                                     | 0 |   |   |
| Cc1ccnc2N(C                                     | 0 | 0 | 0 |
| OC1C(O)c2cc3ccc(cc3cc2CC1=O)[N+](=C             | 0 |   |   |
| COc1ccc(cc1)                                    | 0 | 0 | 0 |
| CNc1ccc(cc1)[N+](=O)[O-]                        | 1 |   |   |
| Cc1cc(NS(=O                                     | 0 | 0 | 0 |
| CC(=O)N(O)c1ccc(\C=C\C2ccccc2)cc1               | 1 |   |   |
| CO[C@@H]1C[C@H](C[C@@H](C)[C@@H]2CC(=O)[C       |   |   | 1 |
| CCCCCCCCc1ccc(OCCOCCO)cc1                       |   |   | 1 |
| NNc1nc(cs1)c2ccccc2                             |   |   | 1 |
| CN(C)[C@H]1[C@@H]2CC3C(=C(O)[C@]2(O)C(=O)C(:    |   |   | 0 |
| CCCCCCCC1CCC(=O)O1                              |   |   | 0 |
| CC(C)(C)NCC(O)COc1cccc2C[C@@H](O)[C@@H](O)C     |   |   | 0 |
| C[C@]12CCC:                                     | 0 | 0 |   |
| CC1CC2=C(C3C(C=C(C)C2=O)C(CCC3=C)C              | 0 |   |   |
| C\C=C/1\[C@@H]2CC3=C(C=CC(=O)N3)[C@@]1(N)C      |   |   | 0 |
| CCOC(=O)C1OC1(C)c2ccccc2                        | 0 |   | 0 |
| OC\C=C/1\[C                                     | 0 | 0 |   |
| ClCC1(C(Cl)Cl)C2CC(Cl)(Cl)C1(CC2(Cl)Cl)(        | 0 |   |   |
| CCCN(CC)C(CC)C(=O)Nc1c(C)cccc1C                 |   |   | 0 |
| O=C1c2cccc3ccc4cccc1c4c23                       | 1 |   |   |
| O=C1N(N=Cc2ccccc2)N=Nc3c1[nH]c4ccc              | 1 |   |   |

|                                                |   |   |
|------------------------------------------------|---|---|
| BrC1c(Br)c(Br)c(Br)c1Br                        | 0 | 0 |
| Nc1ccc(Cl)cc1                                  | 1 | 0 |
| Cc1c(cc(N)cc1[N+](=O)[O-])[N+](=O)[O           | 1 |   |
| CC(CCO)CCC=C(C)C                               | 0 | 0 |
| CCCCC(CC)COC(=O)\C=C/C(=O)OCC(CC)CCCC          |   | 0 |
| CCOc1ccc(Cc:                                   | 1 | 0 |
| Cc1ccc(NO)c(C)c1                               | 1 |   |
| Cn1c(ncc1[N+](=O)[O-])c2nnc(N)s2               | 1 |   |
| Cn1c(CCCC(=O                                   | 0 | 0 |
| CC(C)NCC(O)                                    | 1 | 0 |
| O=N(=O)c1cccc2c(cccc12)N(=O)=O                 | 1 | 0 |
| CC1(C)C2CC[O                                   | 0 | 0 |
| C\C=C/1\C[C@H](C)[C@](O)(CO)C(=O)C             | 0 |   |
| CN1C(=O)C(=C(N=C1C(C)(C)NC(=O)c2oc(C)nn2)C(=O) |   | 0 |
| CC(C)C1=C(Cl)                                  | 0 | 0 |
| [O-][N+](=O)c1ccc(Nc2ccc(Cl)cc2)cc1            | 1 |   |
| C=CC(=O)N(C[C@H]1CO1)C[C@H]2CO2                | 1 |   |
| CCC1Nc2cc(Cl)c(cc2[S+](=O                      | 0 | 0 |
| NC(=O)C1CC:                                    | 0 | 0 |
| OC[C@H](O)[C@@H](O)[C@@H](O)[C@H](O)CO         |   | 0 |
| COC1=CC(=O)CC(C)C12Oc3                         | 0 | 0 |
| ClC1=C(COC1=O)C(Br)Br                          | 1 |   |
| COc1cc(N)c(O                                   | 1 | 0 |
| OCC1(CO)N2CCC(CC2)C1=C                         | 0 |   |
| CCCCCCC(O)C                                    | 0 | 0 |
| O=C1C=C(Oc:                                    | 0 | 0 |
| BrCc1ccc(Br)cc1                                | 0 | 0 |
| C[C@H](CCC(O                                   | 0 | 0 |
| CC\C(=N\O)\C                                   |   | 0 |
| C[C@H]1[C@H](NC(=O)\C(=N\OC(C)(C)C(=O)O)\c2cs  |   | 0 |
| O=C1NC(=O)NC(=O)N1                             | 0 |   |
| CN1C(=O)CN                                     | 0 | 0 |
| CCCCNP(=S)(N)N                                 |   | 0 |
| [O-][N+](=O)                                   | 0 | 0 |
| CCCCCCCCCl                                     |   | 0 |
| N#CCCNCCC#N                                    | 0 | 0 |
| CC(=O)c1ccc2OC3(CC3)C(=O)c2c1                  | 0 |   |
| O=N(=O)c1ccc2c(Cc3cc4CCCCc4cc23)c:             | 1 |   |
| Cc1cccc(c1)c2oc3cccc3n2                        | 0 |   |
| CC(C)(C)O                                      | 0 |   |
| O=C(OC[C@H]1CO1)[C@H]2CCCC[C@@                 | 1 |   |
| Oc1ccc(cc1)C2Oc3cc(O)cc(O)c3C(=O)C2            | 1 |   |
| CC(=O)CCl                                      | 0 | 0 |

|                                              |   |   |   |   |
|----------------------------------------------|---|---|---|---|
| C1=Cc2cccc3cccc1c23                          |   |   |   | 0 |
| CC1\C=C(\C=C)/C(=O)OC2CC[N+](C)CC            | 1 |   |   |   |
| CCN(CC)CCn1nc2ccc(CO)c3c4ccc(Cl)cc4S         | 1 |   |   |   |
| OC(=O)Cc1ccc(CCN[S+])(=C                     | 0 |   |   |   |
| Fc1ccc(cc1)C                                 | 1 | 0 |   | 0 |
| Cc1ccc(OC[C@H]2CO2)cc1                       | 1 |   |   |   |
| CC1=C(CC(=O                                  | 0 |   |   | 0 |
| [O-][N+](=O)c1ccc(cc1)S(=O)(=O)Cl            | 1 |   |   |   |
| OC1=C(O)C(=                                  | 0 | 0 |   | 0 |
| CC(=O)C1=CCC2C3=CCC4=CC(O)C(O)CC4            | 0 |   |   |   |
| CC(=O)OCN(CCCCl)N=O                          | 1 |   |   |   |
| C[C@@H](Oc1ccc(Oc2ncc(Cl)cc2F)cc1)C(=O)OCC#C |   |   |   | 0 |
| CC(=CCC\C(=                                  | 0 | 0 |   | 1 |
| CCCN(C(=NN=O)N)[N+](=O)[O-]                  | 1 |   |   |   |
| C[n+]1c2cccc2c(N)c3cccc13                    | 1 |   |   |   |
| OCC[N+](=O)[O-]                              | 1 |   |   |   |
| NC1=NC(=O)                                   | 0 | 0 |   | 0 |
| OC1C2OC2c3c(ccc4ccc5c6cccc6ccc5c34           | 1 |   |   |   |
| COc1ccc(CCN                                  | 1 | 1 |   |   |
| OCCOCCOCCOCCOCCO                             |   |   |   | 0 |
| OCCOCCOC(=                                   | 0 | 0 |   | 0 |
| CO\N=C(/C(=                                  | 0 | 0 |   |   |
| CC(C)Sc1cc(Cc2ccc(N)c(SC(C)C)c2)ccc1N        | 1 |   |   |   |
| CC(=O)Nc1c(                                  | 0 | 0 |   | 0 |
| CC1OC(=C(O)C1=O)C                            |   |   |   | 0 |
| Cc1cc(c(O)c(C)c1CC2=NCCN2)C(C)(C)C           |   |   |   | 0 |
| COc1c(OC)c2occc2c3OC(=O)C=Cc13               | 0 |   |   |   |
| O=C(OCC1CO1)c2ccc(cc2)N(=O)=O                | 1 |   |   |   |
| CCCCCCCCC(                                   | 0 | 0 |   | 0 |
| NC(=O)OCCC                                   | 0 | 0 |   | 0 |
| CCCC(C)(O)C\C=C\[C@H]                        | 0 |   |   | 0 |
| [O-]C(=O)c1c                                 | 0 | 0 |   | 1 |
| COP(=O)(OC)N1CCOCC1                          | 0 |   |   |   |
| CO[C@H]1C=CO[C@@]2(C)Oc3c(C)c(O)c4c(O)c(NC(= |   |   |   | 1 |
| C1CCc2nccnc2C1                               |   |   |   | 0 |
| Fc1ccc(cc1)C                                 | 1 | 0 |   |   |
| CC(=C)c1cccc(c1)C(C)(C)N=C=O                 |   |   |   | 0 |
| OC1COC2(O)C1OC(=O)C2(O)Cc3c[nH]c4            | 0 |   |   |   |
| CC(C)NCC(O)                                  | 0 | 0 | 0 | 0 |
| N[S+](O)Oc1cc(C(=O)O)                        | 0 |   |   |   |
| FC(F)(F)C(=C(Cl)SSc1cccc1N(=O)=O)Cl          | 1 |   |   |   |
| CC(=O)NC1=NC(=NOC1)c2oc(cc2)[N+](=           | 1 |   |   |   |
| C=CCN(CC=C)CC=C                              | 0 |   |   |   |

|                                              |   |   |   |   |
|----------------------------------------------|---|---|---|---|
| Oc1cccc(c1[N+](=O)[O-])[N+](=O)[O-]          | 1 |   |   |   |
| OC(=O)c1cccc(O)c1                            |   |   | 0 |   |
| CC1=NC(=CC2C1Nc3ccccc23)N                    | 1 |   |   |   |
| CC1CCC2(OC1)OC3CC4C5CC=C6CC(O)CC(            | 0 |   |   |   |
| CC(C)(C)OC(=O)C(N)CN=[N+]=[N-]               | 1 |   |   |   |
| CCCN1C(=O)I                                  | 0 | 0 |   |   |
| N[C@@H](C                                    | 0 | 0 |   | 0 |
| Cc1c(cccc1N(=O)=O)N(=O)=O                    | 1 |   |   | 0 |
| Cc1c2ccc(CO)cc2nc3c1ccc4ccccc34              | 1 |   |   |   |
| C1=Cc2cc3cccc4ccc5ccc1c2c5c34                | 1 |   |   |   |
| NC(CC(=O)c1cccc(O)c1N)C(=O)O                 | 0 |   |   |   |
| N#N=NCCC(c1ccccc1)c2ccccc2                   | 1 |   |   |   |
| COC(=O)C(Cl)Cl                               | 1 |   |   |   |
| CCCN1cnc2N(                                  | 0 | 0 |   | 0 |
| COc1ccc(CCC(=O)C)cc1                         |   |   |   | 0 |
| CNC(=O)O\N=C\C(C)(C)SC                       |   |   |   | 0 |
| CCN(CC)CCNc1ccc2nc(C)n3c4ccc(O)cc4C          | 1 |   |   |   |
| COC(=O)Nc1cccc(OC(=O)Nc2cccc(C)c2)c          | 1 |   |   | 1 |
| OC(=O)CCCCCCCC(=O)O                          | 0 |   |   | 0 |
| CCc1cccc(CC)c1NC(=O)C                        | 0 |   |   |   |
| COc1ccccc1c2ccccc2                           | 0 |   |   |   |
| COC(OC)C(C)c1ccccc1                          |   |   |   | 0 |
| Nc1ccc2cc(cc(O)c2c1)S(=O)(=O)O               |   |   |   | 0 |
| CC1(N(O)c2ccccc2/C1=N\C3CCCC3)c4c            | 0 |   |   |   |
| CCN=NC(C)(C)OO                               | 0 |   |   |   |
| Cn1c(N)nc2cc(ccc12)C#N                       | 1 |   |   |   |
| CCCOCCOCCOCCO                                |   |   |   | 0 |
| C\C1=C\C[C@@]2(C)O(                          | 0 |   |   |   |
| COc1cc2O[C@H]3OC=C[C@H]3c2c4OC(              | 1 |   |   |   |
| CC(c1ccc(O)cc1)c2ccc(O)cc2                   |   |   |   | 1 |
| COc1ccc2c3CCN=C(C)c3[nH                      | 0 | 0 |   |   |
| CC(=O)c1oc(c2ccccc2)c1c3ccccc3)[N+]          | 1 |   |   |   |
| C\C(=C\CCl)\Cl                               |   |   |   | 0 |
| OC(=O)c1ccc                                  | 0 | 0 | 0 | 0 |
| Cc1cccc(NO)c1C                               | 1 |   |   |   |
| [O-]C(=O)C(=O)[O-]                           |   |   |   | 0 |
| Nc1ncnc2c1r                                  | 0 |   |   |   |
| Cn1c(nc2ncc(cc12)c3ccccc3)[N+](=O)[O         | 1 |   |   |   |
| CCCCC(O)c1ccccc1                             |   |   |   | 0 |
| Cc1ccc(cc1NO)N(=O)=O                         | 0 |   |   |   |
| CC1Nc2cc(Cl)c(cc2C(=O)N1c3ccccc3C)S(=O)(=O)N |   |   |   | 0 |
| OCCN(CCO)c1ccc(cc1)N=Nc2ccc(cc2[N+           | 1 |   |   |   |
| ClC1CN(CC1Cl)N=O                             | 1 |   |   |   |

|                                                              |   |   |   |
|--------------------------------------------------------------|---|---|---|
| <chem>COc1cc(C)nc1</chem>                                    | 0 | 0 | 0 |
| <chem>COc1ccc(CNCC(O)COc2ccc3NC(=O)C=Cc3c2)cc1OC</chem>      |   |   | 0 |
| <chem>NC(=O)c1ccc</chem>                                     | 0 | 0 |   |
| <chem>CC(C)(O)[C@@H]1[C@H]2</chem>                           |   | 0 | 0 |
| <chem>CNC1C(O)C(CCC1(C)O)OC2C(O)C(OC3CC</chem>               |   |   | 0 |
| <chem>COc1cc2OC(=CC(=O)c2cc1</chem>                          |   | 0 |   |
| <chem>COC=O</chem>                                           |   |   | 0 |
| <chem>CC(C(=O)O)C</chem>                                     | 0 | 0 | 0 |
| <chem>COc1cccc2C(</chem>                                     | 0 | 0 |   |
| <chem>Oc1ccc2ccccc2c1N=Nc3ccc(cc3[N+](=O)</chem>             |   |   | 1 |
| <chem>Nc1ccc(N=Nc2cccc(c2)N=Nc3ccc(N)cc3I</chem>             |   |   | 1 |
| <chem>ClCCN1CCC(C</chem>                                     | 0 |   |   |
| <chem>Cc1ccc(O)c(O)c1</chem>                                 |   |   | 0 |
| <chem>CCCCCCCCCCCCCN(C)C</chem>                              |   |   | 0 |
| <chem>Cc1ccc(N=Nc2c(O)ccc3ccccc23)c(C)c1</chem>              |   |   | 1 |
| <chem>COC(=O)CC(C)CCC=C(C)C</chem>                           |   |   | 0 |
| <chem>COC(=O)[C@]1(C)CCC[C@]2(C)[C@H]3CCC(=CC3=CC[</chem>    |   |   | 1 |
| <chem>COC(=O)C1=</chem>                                      | 0 | 0 |   |
| <chem>OC(=O)CC[C@</chem>                                     | 0 |   |   |
| <chem>OC[C@H]1O[C@H]([C@H]</chem>                            |   | 0 |   |
| <chem>[O-][n+]1ccccc1SSc2cccc[n+]2[O-]</chem>                |   |   | 1 |
| <chem>OC(=O)c1c(I)cc(I)c(NC(=O)COCCOCCOCC(=O)Nc2c(I)c</chem> |   |   | 0 |
| <chem>O=C1[C@H]2[C@@H]3CC[C@H](C3)[C@H]2C(=O)F</chem>        |   |   | 0 |
| <chem>Cc1cccc(c1)C(=O)Cl</chem>                              |   |   | 1 |
| <chem>CC(C)NCC(O)</chem>                                     | 1 | 0 |   |
| <chem>Nc1cc2c3ccccc3c4cccc(c1)c24</chem>                     |   |   | 1 |
| <chem>Oc1ccc2OC(CC(=O)c2c1)c3</chem>                         |   | 0 |   |
| <chem>CNc1ccc(cc1)C(=O)CC(O)C</chem>                         |   | 0 |   |
| <chem>Nc1ccc2N=C3C(=CC(=N)c4ccccc34)Oc2c</chem>              |   |   | 1 |
| <chem>COc1cccc(c1)C(=O)CCN[C@@H](C)[C@H](O)c2ccccc2</chem>   |   |   | 0 |
| <chem>Oc1ccc2ccccc2c1</chem>                                 |   |   | 0 |
| <chem>BrCC1CO1</chem>                                        |   |   | 1 |
| <chem>COc1ccc2cc(</chem>                                     | 0 | 0 | 0 |
| <chem>Oc1ccc(cc1)C2(NC(=O)NC2=O)c3ccccc3</chem>              |   |   | 0 |
| <chem>O=P1(Oc2ccccc2)OCc3ccccc3O1</chem>                     |   |   | 1 |
| <chem>Oc1cc2ccc(cc2cc1S(=O)(=O)[O-])S(=O)(=O)[O-]</chem>     |   |   | 0 |
| <chem>COCCOC(=O)CC#N</chem>                                  |   |   | 0 |
| <chem>OCCCCCCCCCCCCBr</chem>                                 |   |   | 1 |
| <chem>c1ccc(cc1)c2ccc(cc2)c3ccccc3</chem>                    |   |   | 0 |
| <chem>COc1ccc(NC(=O)C)cc1</chem>                             |   |   | 0 |
| <chem>COC(=O)C1=</chem>                                      | 0 | 0 |   |
| <chem>CN(C)Cc1c[nH]c2ccccc12</chem>                          |   | 0 |   |
| <chem>NC[C@@H]1</chem>                                       | 0 | 0 |   |

|                                            |   |   |   |   |   |
|--------------------------------------------|---|---|---|---|---|
| C1CSCN1                                    |   |   |   |   | 1 |
| NNc1ccc(cc1)N(=O)=O                        |   |   |   |   | 1 |
| ClCC(CCl)(CCl)CCl                          |   |   |   |   | 0 |
| CN1C=CN(CCS(=O)(=O)C)C1\C=N\O              |   |   |   |   | 0 |
| COc1cc(cc(O                                | 0 | 0 |   |   |   |
| Oc1c(I)cc(cc1                              | 0 | 0 |   |   |   |
| CN(C)CCOC(c                                | 1 | 0 | 0 | 0 | 0 |
| Nc1ccc(\C=C\c2ccc(Cl)cc2)cc1               |   |   |   |   | 1 |
| CC#CC(OC(=O)NC1CCCCC1)(c2ccccc2)c3         |   |   |   |   | 1 |
| Nc1ccc(Oc2ccc(Cl)cc2Cl)cc1                 |   |   |   |   | 1 |
| COc1ccc(cc1)C(=O)C2OC2c3ccccc3             |   |   |   |   | 0 |
| CCN1CCC[C@                                 | 1 | 0 |   |   |   |
| CCCO(=O)c1                                 | 0 | 0 |   | 0 |   |
| CN1CCCN(CC                                 | 1 | 1 |   |   |   |
| OC[C@H]1CO1                                |   |   |   |   | 1 |
| CC1OC(CC(N)C1O)OC2=CC(O)(Cc3c(O)c          |   |   |   |   | 1 |
| CC(=O)O[C@                                 | 0 | 0 |   |   |   |
| OC1C=Cc2c(ccc3c(Cl)c4ccccc4cc23)C1O        |   |   |   |   | 1 |
| CCCCC[C@H]                                 | 0 | 0 |   |   |   |
| Cc1c(N)cc(N)cc1N(=O)=O                     |   |   |   |   | 1 |
| CCCCCCCCC=C                                |   |   |   |   | 0 |
| CCC[C@H](N[C@@H](C)C(=O)N1[C@H]2CCCC[C@H]; |   |   |   | 0 |   |
| Cc1cc(C)c2cc(C)c(N)cc2n1                   |   |   |   |   | 1 |
| NS(=O)(=O)[O-]                             |   |   |   | 0 |   |
| Cc1cc(C)cc(NO)c1                           |   |   |   |   | 1 |
| OCCNCCN1C(=O)c2ccccc2C3=C1c4ccccc          |   |   |   |   | 0 |
| OCCCCCCCCC=C                               |   |   |   | 0 |   |
| COC(C(Oc1nc                                | 0 | 0 |   |   |   |
| [O-][N+](=O)c1ccc2c(ccc3ccccc23)c1         |   |   |   |   | 1 |
| Nc1c(O)cccc1N(=O)=O                        |   |   |   |   | 0 |
| CN(C)CCNS(=O)(=O)c1cccc2cccn12             |   |   |   |   | 0 |
| Clc1c2ccccc2c(C=O)c3ccccc13                |   |   |   |   | 1 |
| CN(C)c1ccc(CCO)cc1                         |   |   |   |   | 1 |
| NC(CP(=O)(C                                | 0 | 0 |   |   |   |
| Oc1ccccc1O                                 | 0 | 0 | 0 | 0 |   |
| C[C@]12CC[C                                | 0 | 0 |   |   | 1 |
| OC(=O)c1ccc(Nc2c3ccccc3nc4cc(ccc24)†       |   |   |   |   | 1 |
| C[n+]1c2cc(N)ccc2cc3ccc(I                  |   | 0 |   |   | 1 |
| c1ccc(cc1)c2                               | 0 | 0 |   |   |   |
| NC(=Nc1nc(C                                | 0 |   |   |   |   |
| CC1=CCCC(C)(C)C1\C=C\C(=O)CCC=C            |   |   |   |   | 1 |
| COC(=O)C1=(                                | 1 | 1 |   |   |   |
| CSSc1ccoc1C                                |   |   |   |   | 0 |

|                                                  |   |   |   |
|--------------------------------------------------|---|---|---|
| O1C2C1c3c4ccccc4cc5ccc6cccc2c6c35                | 1 |   |   |
| CCCC\C=C\C(=O)CCc1ccc(O)c(OC)c1                  | 1 |   |   |
| C[C@H]1O[C                                       | 0 | 1 | 1 |
| N1[C@@H]2[C@H]1c3ccccc3c4c2ccc5c                 | 1 |   |   |
| NC(=N)NC(=I                                      | 0 | 0 | 0 |
| CCCC[N+]1(C)CCCC1                                |   |   | 0 |
| CC[S+](=O)([O-])Nc1cccc(c                        |   | 0 |   |
| CCN(C(C)C)C(=O)c1cc(C)cc(OC[C@H])(C)Nc2ccncc2)c1 |   |   | 0 |
| Clc1cc2NC(=O)C3CNCCN3c                           |   | 1 |   |
| O=N(=O)c1ccc2nc3cc(ccc3nc2c1)N(=O):              |   | 1 |   |
| CC(C)(C)C(=O)OCC(=O)[C@H]1CC[C@H]2[C@@H]3CC      |   |   | 0 |
| NC[C@H]1O[C@H](O[C@@H]2[C@@H](N)C[C@@H           |   |   | 0 |
| CC(=O)OC(OC(=O)C)c1oc(cc1)[N+](=O)[              |   | 1 |   |
| CCC(=O)c1ccc                                     | 1 | 1 |   |
| C[C@@H]1O[C@@H](O[C@H]2CC[C@]3(C)[C@H]4C         |   |   | 1 |
| CC(C)c1c(C(=O)Nc2ccccc2)c(c3ccccc3)c(            |   | 0 |   |
| Clc1ccc(C=O)cc1N(=O)=O                           |   |   | 0 |
| CCCCC(=O)N(                                      | 0 | 0 |   |
| C[C@@H](CO)NC(=O)[C@                             |   | 0 |   |
| CC\C=C\C=C\C=C\C=C\C=C\C=OCCCCO                  |   |   | 1 |
| Oc1ccc(c2ccc                                     | 0 | 0 |   |
| CC(=C)C(=O)OCC(Br)CBr                            |   |   | 1 |
| CC1CC(C)(C)c2cc(C(=O)C)c(C)cc2C1(C)C             |   | 0 | 1 |
| CC(C)Oc1cccc(NC(=O)c2ccccc2C)c1                  |   |   | 1 |
| NC(C(=O)O)c1ccc(C(=O)O)                          |   | 0 |   |
| CCCC(C)C1(C(                                     | 0 | 0 | 0 |
| COc1cccc1N                                       |   |   | 1 |
| O=C([C@H]1CCC(=O)N1)N2CCCCC2                     |   |   | 0 |
| O=N(=O)c1ccc2ccc3c(cccc3c2c1)N(=O)=              |   | 1 |   |
| CC(O)CN(CCCN(C)C)CCCN(C)C                        |   |   | 0 |
| Cc1ccc(C)c(C)c1C                                 |   | 0 |   |
| N[C@@H](CCCP(=O)(O)O)                            |   | 0 |   |
| NCCCC(O)(P(=O)(O)O)P(=O)(O)[O-]                  |   |   | 0 |
| CCOC(=O)CBr                                      |   | 1 | 0 |
| CC[C@@H]1                                        | 0 | 0 |   |
| O=CC=Cc1cccc1N(=O)=O                             |   |   | 1 |
| CC(C)CCCC(C)C1CCC2C3CC=C4CC(CCC4(C               |   | 0 |   |
| CCN1CN(CC)CN(CC)C1                               |   |   | 0 |
| OCc1ccc(cc1)N(=O)=O                              |   | 0 |   |
| Cc1cccc2cc3ccc4ccccc4c3cc12                      |   |   | 1 |
| Clc1cccc(Br)c1                                   |   |   | 0 |
| CC(=O)Nc1c(O)cc2c3ccccc3c4cccc1c24               |   |   | 1 |
| CN(C)CCCNc1c2ccccc2nc3cc(ccc13)[N+]              |   |   | 1 |



|                                                  |   |   |   |   |
|--------------------------------------------------|---|---|---|---|
| CC1SC2=C(C(                                      | 0 | 0 | 0 |   |
| COC1=NC(=O)N(CC(O)CN=N#N)C=C1C                   |   |   | 1 |   |
| CS(=O)(=O)NC(=O)c1cc(Oc2ccc(cc2Cl)C(F)(F)F)ccc1N |   |   |   | 0 |
| Nc1ncnc2[nH]nc(Nc3ccc(F                          |   | 0 |   |   |
| CCCCc1cccc1                                      |   |   |   | 0 |
| OC1C=Cc2cc3c(ccc4ccccc34)c(Br)c2C1O              |   |   | 0 |   |
| ClC\C=C/Cl                                       |   |   | 1 |   |
| NCN                                              |   |   | 1 |   |
| CC1(C)S[C@@H]2[C@H](NC(=O)[C@H](N=C)c3ccccc:     |   |   |   | 0 |
| Oc1ccc(\C=C/C#N)\C(=O)                           |   | 0 |   |   |
| CCNC(=O)[C@                                      |   | 0 |   |   |
| CCOC(=O)C(C)(C)C                                 |   |   |   | 0 |
| Clc1ccc2oc3ccccc3c2c1                            |   |   | 1 |   |
| COc1cc(ccc1c2nc3ncccc3[r                         |   | 0 |   |   |
| Clc1ccc(CC#N)c(Cl)c1                             |   |   |   | 0 |
| CCN(CC)C(=O                                      |   | 0 | 0 | 0 |
| CN1C(CC2=C\C(=N/NC(=O)N)\C(=O)C=C12)S(=O)(=O)    |   |   |   | 0 |
| CCCOc1cc2C(=O)CCc2c3ccc4ccccc4c13                |   |   | 0 |   |
| CC(C)(C)NCC(O)COc1ccccc1C2CCCC2                  |   |   | 1 |   |
| OC(=O)c1ccccc1C(=O)O                             |   |   | 0 | 0 |
| Cc1c(nn(c2cc                                     |   | 1 |   | 1 |
| OC(=N)C=Cc1oc(cc1)N(=O)=O                        |   |   | 1 |   |
| CCCCOCC(C)OCC(C)O                                |   |   |   | 0 |
| Cc1c2ccccc2c(CO)c3ccccc13                        |   |   | 1 |   |
| CC(=O)[C@H]1CC[C@H]2[C@@H]3C=CC4=CC(=O)CC[       |   |   |   | 0 |
| CNC(=O)C[C@                                      |   | 0 | 0 | 0 |
| COP(=S)(OC)Oc1ccc(cc1)S(=O)(=O)N                 |   |   |   | 0 |
| OCCN(=O)=O                                       |   |   |   | 0 |
| COC(=O)c1cc                                      |   | 0 | 0 | 1 |
| CCCCC(=O)OCC=C                                   |   |   |   | 0 |
| CC(C)(C)NCC(                                     |   | 0 | 0 | 0 |
| Cc1cc(C)nc(N[S+](=O))([O-                        |   |   | 0 |   |
| CC(OP(=O)(C)Cl)C(C)(C)C                          |   |   |   | 0 |
| O=C(\C=C\C1ccc(cc1)c2ccccc2)c3ccccc3             |   |   | 0 |   |
| CC(C)(Sc1ccc                                     |   | 0 | 0 |   |
| CCN(CC)CC(=                                      |   | 0 | 0 | 0 |
| Cc1ccc2nc3ccc(C)cc3c(N)c2c1                      |   |   | 1 |   |
| CCCNc1ccc(cc1)C(=O)OC(                           |   |   | 0 | 0 |
| CC(=O)Oc1ccc2[C@H]3CC[C@]4(C)[C@@H](O)CC[C@      |   |   |   | 1 |
| C\C=C/1\CC(=C)[C@@](C)(O)C(=O)OCC                |   |   | 1 |   |
| COc1c(N2CCI                                      |   | 0 | 0 | 0 |
| Nc1nc(cs1)c2oc(cc2)[N+](=O)[O-]                  |   |   | 1 |   |
| CCCN(=O)=O                                       |   |   |   | 0 |

|                                                |   |   |   |   |
|------------------------------------------------|---|---|---|---|
| Cc1cc(C)c(\C:                                  | 1 | 0 |   |   |
| OCCCCI                                         |   |   | 1 |   |
| OC1COC(O)(CN(CC(=O)O)N=O)C(O)C1O               |   |   | 0 |   |
| C(COc1ccccc1)Oc2ccccc2                         |   |   |   | 1 |
| COC1\C=C\O                                     | 0 | 0 |   |   |
| OS(=O)c1ccc(Cl)cc1                             |   |   | 0 |   |
| C[S+](CCC(N)                                   | 0 | 0 |   |   |
| C(=C/c1ccccc1)/c2ccccc2                        |   |   |   | 0 |
| O=C(CCCCCN1CCN(CC1)c2c                         |   | 1 |   |   |
| Cc1cc2Cc3ccccc3c2cc1C                          |   |   | 0 |   |
| C1OC1c2c3ccccc3cc4ccccc24                      |   |   | 1 |   |
| CC1CS(=O)(=O)CCN1N=Cc2oc(cc2)N(=O              |   |   | 1 |   |
| COC(=O)CCSCCC(=O)OC                            |   |   |   | 0 |
| CSc1nc(NC(C)C)nc(NC(C)C)n1                     |   |   |   | 0 |
| CN(CS(=O)(=                                    | 0 | 0 |   | 0 |
| CC(=O)OCC1=C(N2[C@H](SC1)[C@H](NC(=O)Cc3ccccc  |   |   |   | 0 |
| C1CCC(CC1)N                                    | 0 | 0 | 0 | 1 |
| COc1ccc(O)c(c1)C(C)(C)C                        |   |   | 0 | 1 |
| CC(=O)OCc1ccc(cc1)N=Nc2ccc(COC(=O)             |   |   | 1 |   |
| COc1c(O)cc2OC(=CC(=O)c2c1O)c3ccc(O             |   |   | 0 |   |
| Nc1cccc2C(=O)c3ccccc3C(=O)c12                  |   |   | 1 |   |
| [O-][N+](=O)c1cc(ccc1Cl)C(F)(F)F               |   |   | 0 |   |
| NC(=O)c1ncr                                    | 0 | 0 | 0 | 0 |
| CCCN1CCC[Ci                                    | 0 | 0 |   | 0 |
| CNc1cc(OC)c(cc1Cl)C(=O)N[C@H]2CCN(Cc3ccccc3)[C |   |   |   | 0 |
| CCCN(CCC)[C@@H]1CCc2c                          |   | 0 |   |   |
| C[N+](C)(C)CCO                                 |   | 0 | 0 |   |
| CCN(CCCOC(=O)c1ccc(OC)c(OC)c1)C(C)Cc2ccc(OC)cc |   |   |   | 0 |
| OC(=O)CNC(=O)c1ccc(cc1)[N+](=O)[O-]            |   |   | 1 |   |
| OC1C=Cc2c(C1O)c3ccc4ccccc4c3cc2[N+]            |   |   | 1 |   |
| CC(CCC(=O)O)C1CCC2C3CCC4CC(=O)CCC              |   |   | 0 |   |
| OC1C=Cc2c(ccc3cc4c(ccc5ccccc45)cc23)           |   |   | 1 |   |
| O=Nc1ccc2c(Cc3ccccc23)c1                       |   |   | 1 |   |
| CC(=O)Nc1nc(NC(=O)C)nc(n1)c2oc(cc2)            |   |   | 1 |   |
| OS(=O)(=O)CCCN1CCOCC1                          |   |   |   | 0 |
| CO\N=C(/C(=O)NC1C2SCC(=C(N2C1=O)(              |   |   | 0 |   |
| [O-]S(=N)(=O)Cc1noc2ccc                        |   | 0 |   |   |
| [O-]P(=O)([O-])OP(=O)([O-])[O-]                |   |   |   | 0 |
| NC(=O)Cc1cccc(C(=O)c2ccccc2)c1N                |   |   |   | 0 |
| CN1C(=O)N(i                                    | 0 | 0 |   |   |
| CC(C)NCC(O)                                    | 0 | 0 |   | 0 |
| CCNCCO                                         |   |   |   | 0 |
| C[C@H](O)[C@H](O)[C@H]1CNC2=C(N1)C(=O)N=C(N    |   |   |   | 0 |

|                                                                                  |   |   |   |   |
|----------------------------------------------------------------------------------|---|---|---|---|
| OC(Cn1cncn1                                                                      | 0 | 0 | 0 | 1 |
| COc1cccc2C(=O)c3c(O)c4C[C@](O)(C[C@H]1O[C@@H](Oc2cccc3C(=O)c4                    | 1 |   |   |   |
| O=C1Oc2c(C=C1)ccc3occc23                                                         | 1 |   |   |   |
| NC(=O)c1cc[n+](CC2=C(N3[C@H](SC2)[C@H](NC(=O)O=N(=O)c1ccc2ccc3ccc(c4c5CCCCc5c1c2 | 0 |   |   |   |
| ClC1C2OC2C3C1C4(Cl)C(=C(Cl)C3(Cl)C4(Cl)Cl)Cl                                     | 1 |   |   |   |
| ClC1C(Cl)C(Cl)C(Cl)C(Cl)C(Cl)C(Cl)C(Cl)Cl                                        | 0 | 0 | 0 |   |
| CN1C2=CC(=[NH2+])C=CC2=Cc3ccccc13                                                | 1 |   |   |   |
| OCC1OC(CC1O)N2C=C(\C=C\Br)C(=O)N(CCCN(CC)CCCN(C1Cc2ccccc2                        | 0 | 1 | 0 |   |
| CC(C)CCC[C@H](C)C(C)C                                                            | 0 | 0 |   |   |
| CC1=C(Cl)C(=O)N(C(=O)N1)C(C)(C)C                                                 | 0 |   |   |   |
| C[C@H]1CC2COC(=O)CNC(=O)C(C)(C)Br                                                | 0 |   |   |   |
| CCC(=O)N(O)c1ccc(cc1)c2ccccc2                                                    | 1 |   |   |   |
| Cc1ccc(O)cc1                                                                     | 0 |   | 0 |   |
| Nc1oc(c(O)n1)cc1                                                                 | 0 | 0 |   |   |
| Cn1cc(C2=C(Cl)C(=O)N(C)C2)cc1                                                    | 1 |   |   |   |
| NC#N                                                                             | 0 | 0 | 0 |   |
| Nc1ccncc1N                                                                       | 0 | 0 | 0 |   |
| ClC(=O)c1cc(cc(c1)N(=O)=O)N(=O)=O                                                | 1 |   |   |   |
| OC(=O)CN(CC(=O)O)CC(=O)O                                                         | 0 |   | 0 |   |
| CC(C)CCO                                                                         | 0 |   | 0 |   |
| C[C@H](O)C(=O)C                                                                  | 0 | 0 | 0 |   |
| CCC(=O)c1c(cc1)C(=O)C                                                            | 0 | 0 | 1 |   |
| CCCCC(C)(O)\C=C\C1C(O)CC(=O)C1\C(C)C                                             | 0 |   |   |   |
| CN1CCN(CC1)C(=O)OC2N(C)C(=O)C2                                                   | 0 |   |   |   |
| CN(CCCN1c2c(C)C(=O)N1)C(=O)C2                                                    | 1 | 1 |   |   |
| Cc1cccc2ccc(cc12)[N+](=O)[O-]                                                    | 1 |   |   |   |
| Nc1cnc2c(c1)nc3cccn23                                                            | 1 |   |   |   |
| [O-][N+](=O)c1cc(cs1)C(=O)Nc2cccc(Cl)2                                           | 1 |   |   |   |
| O=N(=O)c1ccc2cccc3c4ccccc4c1c23                                                  | 1 |   |   |   |
| CCC(C)(CCC(C)C)C(=O)OC=C                                                         | 0 |   | 0 |   |
| Clc1ccc(cc1)N2C(=O)CCC2=O                                                        | 0 |   |   |   |
| CCCCc1ccc2[r]c(C)C(=O)C1                                                         | 0 |   |   |   |
| COC(=O)C1=C(C)NC(=C(C1c2ccccc2N(=O)=O)C(=O)OC                                    | 1 |   |   |   |
| OC(=O)Cc1ccccc1N(=O)=O                                                           | 1 |   |   |   |
| COc1c2CC(O)c(C)C(=O)C1                                                           | 0 |   |   |   |
| CN1C2CCC1C(=O)C2                                                                 | 1 | 1 |   |   |
| ClC1=C(Cl)C2(Cl)C3C4CC(C)C(=O)C1                                                 | 0 | 0 |   |   |
| CCCC(=O)N1N=CC(=C(Cl)C1=O)Cl                                                     | 0 |   |   |   |
| Cc1c(C)c(c(c1C)[N+](=O)[O-])C(C)(C)C                                             | 0 |   |   |   |

|                                                   |   |   |   |
|---------------------------------------------------|---|---|---|
| CCCC(=O)OCc1ccccc1                                |   |   | 0 |
| C[N+](O)CCCC1c2cccnc2                             | 0 |   |   |
| O=Cc1ccccc1                                       | 0 |   | 0 |
| Oc1ccc(cc1[N+](=O)[O-])[N+](=O)[O-]               | 0 |   |   |
| Cc1ccc2nc3c(ccc4ccccc34)cc2c1                     | 1 |   |   |
| CC[C@@H](C)[C@@H](N)C1=N[C@@H](CS1)C(=O)N         |   |   | 0 |
| [O-][N+](=O)                                      | 0 | 0 |   |
| CCCCCNCCCCC                                       | 0 |   | 0 |
| CCN(CC)C(=S)SSCC(NC(=O)C)C(=O)O                   | 0 |   |   |
| CCc1ccc(C)c1N(C(C)COC)C(=O)CCl                    |   |   | 0 |
| COc1nc(C)nc                                       | 0 | 0 | 0 |
| CNC(=O)\C=C(/C)\OP(=O)(OC)OC                      | 1 |   | 0 |
| CCOC(=O)[C@H](SP(=S)(OC)OC)c1ccccc                | 0 |   |   |
| OC(=O)CCC(=                                       | 0 | 0 |   |
| CC1(C)OC2CO[C@]3(CO[S-                            | 0 |   |   |
| OCCn1c(CO)nc1[N+](=O)[O-]                         | 1 |   |   |
| C[C@H]1CC2C3CCC4=CC(=                             | 0 |   |   |
| C[C@@H]1Cl                                        | 0 | 0 |   |
| CCOS(=O)(=O)OCC                                   | 1 |   | 0 |
| COC(=O)C(=C)Cl                                    | 1 |   |   |
| OC(=O)c1ccc(\C=N\n2nnc3c4ccccc4nc3c               | 1 |   |   |
| CN(N=O)N(C(=O)\C(=N/O)\C(=O)C)c1cc                | 1 |   |   |
| Oc1ccc(Nc2c3ccccc3nc4ccccc24)cc1                  | 1 |   |   |
| CC(C)(C)C(=O)C(Oc1ccc(Cl)cc1)n2cncn2              |   |   | 0 |
| C[N+](C)(CC=C)CC=C                                |   |   | 0 |
| COP(=O)(OC)OC                                     | 1 |   | 0 |
| OC(=O)c1snc(Cl)c1Cl                               |   |   | 0 |
| CC(=O)OC1COC(Nc2ccc(cc2)[N+](=O)[O                | 1 |   |   |
| ClCCN(CCCl)P1(=O)NC(=O)CCO1                       | 1 |   |   |
| NC(=O)c1ccc                                       | 0 |   |   |
| Cc1c(C(=O)NCCO)[n+](O)c2ccccc2[n+                 | 1 |   | 0 |
| CN(C)Cc1ccccc1O                                   |   |   | 0 |
| [O-][N+](=O)c1ccc2sncc2c1                         | 1 |   |   |
| CCCC\C=C(/C)                                      | 0 | 0 |   |
| C[C@H](CCc1ccccc1)NC[C@@H](O)c2cc                 | 0 |   |   |
| COc1ccc2C[C@@H]3N(C)C                             | 1 |   |   |
| COCCCOc1ccnc(C[S+](O-                             | 0 |   |   |
| CC(C)OC(=O)OCOP(=O)(CO[C@H](C)Cn1cnc2c(N)ncnc     |   |   | 0 |
| NNc1ccccc1[N+](=O)[O-]                            | 1 |   |   |
| CCC(=O)OC(CC(=O)O)C[N+                            | 0 |   |   |
| Oc1c(Cc2c(O)c(cc3ccccc23)C(=O)[O-])c4ccccc4cc1C(= |   |   | 1 |
| COC(=O)C(CN                                       | 0 | 0 | 0 |
| C[C@H](O)[C@H]1[C@@H                              | 0 |   |   |

|                                                 |   |   |   |
|-------------------------------------------------|---|---|---|
| CNC(=O)c1c(ncn1C)N(C)N=O                        | 0 |   |   |
| CC12OOC1(C)c3ccccc3O2                           | 1 |   |   |
| O=C(OCC1CCC2OC2C1)C3CCC4OC4C3                   | 1 | 0 |   |
| CN(C)CCC#N                                      |   | 0 |   |
| CC(=O)C1C(=O)C=C2Oc3c(C(=O)C)c(O)c(             | 0 |   |   |
| CN1CCN(CC1)c2ccc3ccccc3                         | 0 |   |   |
| C1CCN2C[C@@H]3C[C@@                             | 0 |   |   |
| CN(C)CCOC(=O)C=C                                | 0 | 0 |   |
| CCO\C=C\1/N=C(OC1=O)c2ccccc2                    |   | 0 |   |
| CC(=O)Nc1nnc(s1)[S+](=O                         | 0 |   |   |
| CCCCC(CC)C(=O)Cl                                |   | 0 |   |
| O=N(=O)c1ccc2ccccc3C=Cc1c23                     | 1 |   |   |
| CCN(CC)c1cc(NC(=O)C)c(cc1OC)N=Nc2c              | 1 |   |   |
| C[C@@H]1CN[C@@H](C)O1                           | 1 |   |   |
| COc1cccc(CNc2ccc3nc(c4c                         | 0 |   |   |
| ClNc1nc(NCl)nc(NCl)n1                           | 0 |   |   |
| Oc1cccc2c1ccc3nc4ccc5ccccc5c4cc23               | 0 |   |   |
| CC(C)NC[C@                                      | 0 | 0 |   |
| CC1=CC(=O)c2[nH]c(C)c3c4ccccc4nc3c2(            | 1 |   |   |
| CCCCN=C=O                                       |   | 0 |   |
| CCOC(=O)C1:                                     | 0 | 0 |   |
| C[C@@H](N)C(=O)c1ccccc1                         |   | 0 |   |
| CCOc1ccc(c2:                                    | 0 | 0 | 0 |
| CCOP(=NC(C)C)(O)Oc1ccc(SC)c(C)c1                | 0 |   |   |
| Clc1cc(I)cc(Cl                                  | 0 | 0 |   |
| CCCc1nc(c(C(=O)OCC2=C(C)OC(=O)O2)n1Cc3ccc(cc3)c |   | 0 |   |
| OC(=O)c1cc(ccc1O)N=Nc2ccc(cc2)c3ccc             | 1 |   |   |
| CN(C)CCN(C)CCc1ccc(Cl)c(                        | 1 |   |   |
| OC(CC(=O)OCCBr)C(=O)OCCBr                       | 1 |   |   |
| CC(=O)CCC1=C(C)CCCC1(C)C                        |   | 0 |   |
| CN(C)[C@H]:                                     | 0 | 0 |   |
| CC1(C)S[C@@H]2[C@H](N3C(=O)C(NC3(C)C)c4ccccc4   |   | 0 |   |
| NCCc1ccc(O)                                     | 0 | 0 | 1 |
| CC(C)(C)NCC(O)COc1nsnc1N2CCOCC2                 | 0 |   |   |
| OC12N=C(SC1Cc3cc(Cl)ccc23)c4ccccc4              |   | 1 |   |
| [O-][N+](=O)c1ccc2ccc3ccc(c4c5ccccc5c           | 1 |   |   |
| [O-][N+](=O)c1cccc2c3ccccc3[nH]c12              | 1 |   |   |
| CCC(Cl)CC(Cl)C(Cl)C(Cl)C(Cl)C(Cl)C(Cl)Cl        |   | 0 |   |
| OC1C=Cc2cccnc2C1O                               | 0 |   |   |
| CCC(=O)O[C@H]1CC[C@H]2[C@@H]3CCc4cc(OC(=O)      |   | 0 |   |
| Nc1nc(Cl)nc2                                    | 0 | 0 |   |
| Nc1c(Br)cc(Br)c2C(=O)c3ccccc3C(=O)c1            | 1 | 1 |   |
| COC1=C(Oc2c(ccc3occc23)                         | 0 |   |   |

|                                             |   |   |   |
|---------------------------------------------|---|---|---|
| [O-]C(=O)CNc1ccccc1                         |   |   | 0 |
| CCC(=O)O[C@@]1([C@H](C)C[C@H]2C3C[C@H](F)C4 |   |   | 1 |
| NCC[S+](=O)(O)[O-]                          | 0 |   |   |
| CN([C@H](CN1CCCC1)c2cc                      | 0 |   |   |
| CC(O)CN                                     |   | 1 | 0 |
| Nc1c(Oc2ccccc2)cc(O)c3C(=O)c4ccccc4(        |   | 1 |   |
| CC1CC(C)C(=O)C(C1)C(O)CC2CC(=O)NC(=         |   | 0 |   |
| N#N=NC(c1ccccc1)c2ccccc2                    |   | 1 |   |
| CC(Cc1ccc2OCOc2c1)NO                        |   |   | 0 |
| CCN(CC)CCc1c[nH]c2ccccc12                   |   |   | 0 |
| C(Oc1ccc2ccccc2c1)C3CO3                     |   | 1 |   |
| OCCO[C@H]1[C@@H](O)O[C@H](CO)[C@@H](O)[C    |   |   | 0 |
| COC(=O)C(=Cc1oc(cc1)N(=O)=O)N(=O)=          |   | 1 |   |
| COC(=NN=Cc1cn(=O)c2ccccc2n1=O)O             |   | 1 |   |
| Oc1ccc2ccccc2n1                             |   | 0 |   |
| CCCCCOC(=O)c1ccccc1C(=O)OCCCCC              |   |   | 0 |
| COc1cccc(O)c1O                              |   |   | 0 |
| C[C@@H](Cc                                  | 0 | 0 |   |
| CC\C=C/CCOC(=O)c1ccccc1                     |   |   | 0 |
| COc1cc2CCN(C)C(=O)c2cc1                     |   | 0 |   |
| CN1C(=O)\C(=N\NC(=S)N)\c2ccccc12            |   |   | 1 |
| OC(=O)CC(=O)O                               |   | 0 | 0 |
| OP(=O)([O-])C(Sc1ccc(Cl)cc1)P(=O)(O)[O-]    |   |   | 0 |
| OC(=O)c1ccccc1C(=O)Nc2c                     |   | 0 |   |
| COc1cc2OC[C@H]3Oc4c5C                       |   | 0 |   |
| CCOC(CN1CC                                  |   | 1 | 0 |
| CC(=O)OC1C2CC(C)(C)CC2=C(C=O)C3(CC          |   | 0 |   |
| OC[C@H](O)[C@H]1OC(=O)C(=C1[O-])O           |   |   | 0 |
| C[C@H]1C(=O)O[C@H]2CCN3CC=C(COC             |   | 0 |   |
| [O-][N+](=O)c1cccc2cnscc12                  |   | 1 |   |
| N[S+](=O)([O-])c1cc2c(NC                    |   | 0 |   |
| Cc1cc(N)c2cc                                |   | 1 |   |
| CN1C(=O)N(                                  |   | 0 | 0 |
| CC(C)(C)NC[C                                |   | 0 | 0 |
| Cc1cc(O)c(cc1C(C)(C)C)C(C)(C)C              |   |   | 1 |
| BrCc1c2ccccc2c3ccc4cccc5ccc1c3c45           |   | 1 |   |
| O[C@@H]1C                                   |   | 0 | 0 |
| [O-][N+](=O)\C=C\c1ccccc1                   |   | 1 |   |
| [O-][N+](=O)c1ccc(OC=C)cc1                  |   | 1 |   |
| COc1ccccc1CC(Cc2nc3ccccc                    |   | 1 |   |
| Cc1cc(O)c2c(O)c3c(O)cccc3cc2c1              |   | 1 | 1 |
| CNc1nc2c3cccnc3ccc2n1C                      |   | 1 |   |
| CN(CCOc1ccc                                 |   | 0 | 0 |

|                                              |   |   |   |   |
|----------------------------------------------|---|---|---|---|
| OCCc1c[nH]c2cc(ccc12)[N+](=O)[O-]            |   |   | 1 |   |
| CN(Cc1ccc2N                                  | 0 | 0 |   |   |
| Oc1c(l)cc(c2c                                | 0 |   |   | 0 |
| CCCC(=O)OCC(=O)[C@H]1[C@H](C)C[C@H]2[C@@H    |   |   |   | 0 |
| CCC(C)(O)CCCC(C)C                            |   |   |   | 0 |
| Clc1cc2Oc3cc(Cl)c(Cl)cc3Oc2cc1Cl             |   |   | 0 |   |
| CN(C)CCCN1c                                  | 1 | 1 | 0 |   |
| CCCCCCCCC                                    | 0 | 0 |   |   |
| CC(=O)OCCOC(=O)C                             |   |   |   | 0 |
| Nc1nc2ncnc2c[nH]1                            |   |   | 0 |   |
| OCC1OC(O)C                                   | 0 | 0 |   |   |
| NC1=NC(=O)N(C[C@@H](CO)OCP(=O)(O)O)C=C1      |   |   |   | 0 |
| Cc1ccc2cc3c4C=CC(O)C(O)c4ccc3c5CCc1          |   |   | 1 |   |
| Cc1ccc(cc1)S                                 | 0 |   |   | 0 |
| COc1ccc2c(c:                                 | 0 | 0 |   |   |
| ClCc1ccccn1                                  |   |   | 1 | 0 |
| [O-][N+](=O)c1c2CCCCc2c3ccc4ccc5ccc          |   |   | 1 |   |
| CCN1CCN(C(=O)NC(C(=O)NC2C3SC(C)(C            |   |   | 0 |   |
| CNC[C@H](C                                   | 0 | 0 |   | 0 |
| COc1cc2CC(=O)NN=C(c3cc                       |   | 0 |   |   |
| CN(C)CCCNc1c2cccc2nc3c(cccc13)[N+]           |   |   | 1 |   |
| CCCC(=O)O[C                                  | 0 | 0 |   |   |
| Oc1ccc(cc1)C                                 | 1 | 0 |   | 0 |
| c1ccc2cc3cccc3cc2c1                          |   |   | 1 | 1 |
| OC1C=Cc2c(cc3ccc4c(ccc5ccc2c3c45)[N-         |   |   | 1 |   |
| CC(C)COS(=O)(=O)C                            |   |   | 1 |   |
| [O-][N+](=O)\C=C\c1ccc2c                     |   | 0 |   |   |
| NC1(C[C@H]([C@@H](C1)                        |   | 0 |   |   |
| CS(=O)(=O)NC(=O)CCC\C=C/C[C@@H]1[C@@H](\C=   |   |   |   | 0 |
| Cc1cc2C(O)C(O)C=Cc2c3cc4cccc4cc13            |   |   | 1 |   |
| CCN(CC)CCO                                   | 0 | 0 |   | 0 |
| BrCC(Br)COP(=O)(OCC(Br)CBr)OCC(Br)C          |   |   | 1 | 1 |
| CN1C(=O)[C@@H](NC(=O)c2cc3cccc3[nH]2)N=C(c4c |   |   |   | 1 |
| C[C@@H]1CCC2[C@@H](C)[C@@H](O)O[C@@H]3C      |   |   |   | 0 |
| C[n+]1ccc2[C@@H]3O[C@@H]3C=Cc1               |   |   | 1 |   |
| CCCCN(CCO[N+](=O)[O-])[N+](=O)[O-]           |   |   | 1 |   |
| CCN(CCCl)c1ccc(CCCNc2c3cccc3nc4ccc           |   |   | 1 |   |
| CC(O)CCC(=O)c1coccc1                         |   |   | 0 |   |
| CC(=O)NNC(=O)c1ccccn1                        |   |   | 0 |   |
| Cc1cccc1OCC(O)CNCCOc2                        |   | 0 |   | 0 |
| CN1CCCN=C1                                   | 1 | 1 |   |   |
| CN1N=C(S/C,                                  | 0 |   |   |   |
| C1CN(CCO1)c2nc(nc3cccc23)c4cccs4             |   |   | 1 |   |

|                                                 |   |   |   |
|-------------------------------------------------|---|---|---|
| CCCCC#Cc1nc(NC)c2ncn([C                         | 0 |   |   |
| N[S+](=O)([O-])c1cc(ccc1(                       | 0 |   |   |
| CN1C(=O)N(                                      | 0 | 0 | 0 |
| CC1CN1                                          |   | 1 | 0 |
| OC[C@@H](                                       | 0 | 0 |   |
| CN(\C=N\c1ccc(C)cc1C)\C:                        | 0 |   |   |
| COc1cc2nc3occc3c(OC)c2cc1OC                     |   | 1 |   |
| CCCCOC(=O)c1ccccc1N                             |   | 0 |   |
| CC(=O)O[C@@]1(CC[C@H]2[C@@H]3CCC4=CC(=O)C       |   |   | 0 |
| CCCCOC(=O)c1cc2c(cn1)[n                         | 0 |   |   |
| CN1C(=O)N(                                      | 0 | 0 |   |
| CC1=CC(=O)C=C2Oc3cc(N)                          | 0 |   |   |
| CC(Cc1ccc(O)c(O)c1)C(C)C                        | 0 | 0 | 1 |
| CCOCc1c(O)cc2C(=O)c3ccccc3C(=O)c2c1             |   | 1 |   |
| C[C@@H](O)CCC(=O)c1cccc1                        |   | 0 |   |
| CCN(CCON(=O)=O)N(=O)=O                          |   | 1 |   |
| ClC(Cl)C1=C(Cl)C(=O)OC1                         |   | 1 |   |
| CC(C)(C)c1cc(cc(c1O)N(=O)=O)N(=O)=O             |   |   | 1 |
| CC(C)CC1NC(                                     | 0 | 0 | 0 |
| C[C@H]1CC2                                      | 0 | 0 |   |
| CC(C)C1OCCN1CCOC(=O)NCCCCCNC(=O)OCCN2CCOC       |   |   | 0 |
| CCc1ccc(NC(=O)c2csc(c2)N(=O)=O)cc1              |   | 1 |   |
| CCCCCCCCCCCCCCCC(=O)O[C@@H]1CC(=C(C=C\C=C\C     |   |   | 0 |
| ClC1=C(Cl)C(=O)N(N=C1)S(=O)(=O)c2cc             |   | 0 |   |
| Clc1ccc(N2C(=O)CCC2=O)c(Cl)c1Cl                 |   | 0 |   |
| C[C@H](CCc1ccccc1)c2ccccc2                      |   | 0 |   |
| COP(=O)(O)O                                     |   | 0 |   |
| COP(=O)(OC)OC(=CC(=NC)O)C                       |   | 1 |   |
| CC1(C)CC(O)CC(C)(C)N1                           |   |   | 0 |
| CC(C)NC[C@@H](O)COc1c                           | 0 |   |   |
| Nc1nc(O)c2n                                     | 0 | 0 |   |
| Nc1ccccc1C(F)(F)F                               |   | 0 |   |
| OC(=O)CCC\C=C/C[C@@H                            | 0 |   |   |
| OC1=CC(=O)(                                     | 0 | 0 |   |
| O=C1NC(C(=O)[N-]1)(c2ccccc2)c3ccccc3            |   |   | 0 |
| COc1ccccc1N                                     | 1 |   | 0 |
| C[N+](=O)C1CCC(CC1)[C@@H]                       | 0 |   |   |
| COc1c(Cl)c(Cl)c(c(Cl)c1Cl)N(=O)=O               |   | 0 |   |
| N[S+](=O)([O-])c1cc2c(N[                        | 0 |   |   |
| Oc1ccccc1\C=N\Cc2ccccc2                         | 0 |   | 1 |
| CCCC[C@@H]1C(=O)N(N(C1=O)c2ccc(O                |   | 1 |   |
| Cc1c(c2ccc(O)cc2)n(Cc3ccc(OCCN4CCCCC4)cc3)c5ccc |   |   | 1 |
| CC(=O)Oc1cc                                     | 0 | 0 | 1 |



|                                                |   |   |   |
|------------------------------------------------|---|---|---|
| CCOC(=O)C1=C(C)N=C(C)C(=C(O)OCC2C              | 0 |   |   |
| COc1cc(N)c(Cl)cc1C(=O)N(                       | 0 |   | 0 |
| O=N(=O)c1ccc2c(Cc3cccc(c23)N(=O)=O             | 1 |   |   |
| CCN(CC)C(=O)[C@@]1(C[C@@H]1CN)c2cccc2          |   | 0 | 1 |
| CNC(=O)[C@                                     | 0 |   |   |
| FC(F)(F)C(F)(F)C(F)(F)C(F)                     | 0 |   | 0 |
| Oc1c2c3cccc3c4ccc5ccc6cccc1c6c5c24             | 0 |   |   |
| COc1cc2C=CC(=O)Oc2c(O)                         | 0 |   |   |
| CN1C(C(=O)Nc2cccn2)C(=O)c3sccc3S1(             | 0 |   |   |
| COC(=O)CCC(=O)OC                               | 0 |   | 0 |
| Clc1ccc(CC2C                                   | 0 | 0 | 0 |
| C[C@]12CCC                                     | 0 | 0 | 0 |
| O=C1c2cccc3cccc(c4ccc5ccccc5c14)c23            | 0 |   |   |
| CCC(C)Nc1snc2cccc12                            | 0 |   |   |
| CC(=O)c1c(C)c(c(c1C)N(=O)=O)C(C)(C)            | 0 |   |   |
| CCCC[n+]1cccc1                                 |   |   | 0 |
| CCN(CC)C(=O                                    | 0 | 0 |   |
| Cc1ccc2C(=O)c3cccc3C(=O)c2c1[N+](=             | 1 |   |   |
| CCCN1CCC[C                                     | 0 |   |   |
| CCCCCCCCC                                      | 0 | 0 |   |
| CN1CCCC(CC                                     | 1 | 1 |   |
| CN(CCO)C(=O)Nc1ccc(Cl)c(Cl)c1                  | 0 |   |   |
| COc1ccc2cc(                                    | 0 | 0 |   |
| C[C@H]1O[C@H](O[C@H]2[C@H](O)[C@@H](O)[C@      |   |   | 0 |
| CC[C@H](C)C                                    | 0 | 0 | 1 |
| C[C@@H]1C                                      | 0 | 0 |   |
| CC(=O)Nc1ccc2ccc3cccc4ccc1c2c34                | 1 |   |   |
| O[N+](=C(Cl)Cl)[O-]                            | 1 |   |   |
| CCC(=O)O[C@H]1[C@H](C[C@H]2[C@@H]3CC[C@H]      |   |   | 0 |
| CC1C=Cc2ccc3ccc4cccc4c3c12                     | 0 |   |   |
| Cc1c(C(=O)O)c(O)cc2C(=O)c3c(O)c(O)c([C@@H]4O[C |   |   | 0 |
| CC(=O)c1cccc1                                  | 0 |   | 0 |
| O1C2C1c3cc4c(ccc5ccccc45)cc3c6cccc2            | 1 |   |   |
| NC[C@@H]1CC[C@H](CC1)C(=O)c2ccc(               | 0 |   |   |
| Cc1cccc(c1)C2=CC(=O)c3cc                       | 0 |   |   |
| OC[C@@H](O)[C@@H](O)[C@@H](O)                  | 1 |   |   |
| CN1CCC=C2C1CCc3sc(N)nc23                       | 1 |   |   |
| NC[C@@H]1                                      | 0 | 0 |   |
| ClCC1C(CCl)C2(Cl)C(=C(Cl)C1(Cl)C2(Cl)Cl        | 0 |   |   |
| NC(=N)NN(=O)=O                                 |   |   | 0 |
| Cc1ccc(c(c1)[N+](=O)[O-])[N+](=O)[O-]          | 1 |   |   |
| [O-][N+](=O)c1cccc(c1)S(=O)(=O)OC[C@           | 1 |   |   |
| COC1=CC=CC=CC1                                 | 1 |   |   |

|                                                 |   |   |   |
|-------------------------------------------------|---|---|---|
| CN(C)CCN1C=CN(C)C1\C=N\O                        | 0 |   |   |
| OCc1c2ccccc2c(CO)c3c1ccc4ccccc34                | 1 |   |   |
| O=C1CCCCCCCCC=CCCC1                             |   |   | 1 |
| NC(=S)NS(=C                                     | 0 |   | 0 |
| COc1cc(O)c2C(=O)c3c(OC)cc4O[C@@H]               | 1 |   |   |
| CC1(C)Oc2cc                                     | 0 | 0 | 0 |
| Oc1cc2C(=O)c3ccccc3C(=O)c2c(O)c1C=C             | 0 |   |   |
| [O-][N+](=O)c1cccc(CO\N=C\c2nc3cc(c             | 0 |   |   |
| [O-][s+]1(=O)n(CCN2CCC(=                        | 0 |   |   |
| CC[N+](CCC                                      | 0 | 0 | 0 |
| C\C(=C/C=C/C=C(\C)/C=C/C=C(\C)/C=CC1=C(C)C(=O)C |   |   | 0 |
| C1c2ccc3ccccc3c2Cc4ccc5ccccc5c14                | 1 |   |   |
| O=C1CCCC=C1                                     | 0 |   | 0 |
| OC1C(O)c2cccnc2C3OC13                           | 0 |   |   |
| CC(=O)NCCC                                      | 0 | 0 | 0 |
| CCCCCCCCCCC#N                                   |   |   | 0 |
| CCCCCCCCOS(=O)(=O)[O-]                          |   |   | 0 |
| CCNC(=O)C(C)OC(=O)Nc1ccccc1                     |   |   | 0 |
| CCCCCOC(=O)CCC                                  |   |   | 0 |
| Cc1ccc2OC(=CC(=O)c2c1)c                         | 0 |   |   |
| CC1(CCC2(C)C(C1)C(=O)CC3C4(C)CCCC23             | 0 |   |   |
| CCN(C)N=O                                       | 1 |   |   |
| [O-][N+](=O)c1ccc2CCc3ccccc1c23                 | 1 |   |   |
| [O-][N+](=O)                                    | 1 | 0 |   |
| Nc1nc(Cl)nc2c1ncn2[C@@H]3O[C@H](CO)[C@@H](      |   |   | 0 |
| CN1CC(=CC2C1Cc3cn(CC=C)c4ccccc2c34)(            | 1 |   |   |
| Cc1nnc2CN=(                                     | 0 | 0 | 0 |
| O=N(=O)c1oc2cc3ccc4cccc5ccc(c2c1)c3             | 1 |   |   |
| Cc1cc2N=C3C(=O)NC(=O)N                          | 0 |   |   |
| S=C=NCCc1ccccc1                                 | 1 |   |   |
| Oc1cc(nc2C(=                                    | 0 | 0 | 1 |
| COC(=O)c1ccccc1S(=O)(=O)NC(=O)Nc2nc(C)cc(C)n2   |   |   | 0 |
| Oc1cccc2Cc3                                     | 0 | 0 | 0 |
| CCOCC(=O)O                                      |   |   | 0 |
| Cc1cc(cc(C)n1)c2cc3N(C4CC4)C5=CC(=O             | 1 |   |   |
| Cc1cn2c(N=O)c(nc2s1)c3ccc(cc3)N(=O):            | 1 |   |   |
| COc1ccc2[C@H](OC(=O)c2                          | 0 |   | 0 |
| OCCN1C[C@H](O)[C@@H](O)[C@H](O)[C@H]1CO         |   |   | 0 |
| O=N(=O)c1ccn(=O)cc1                             | 1 |   |   |
| COc1ccc(CCN                                     | 0 |   |   |
| Cc1ccc(cc1C(=O)O)[N+](=O)[O-]                   | 1 |   |   |
| CC1CN(CC(C)O1)N=O                               | 1 |   |   |
| OC(=O)C=Cc1cnc[nH]1                             | 0 |   |   |

|                                                |   |   |   |
|------------------------------------------------|---|---|---|
| [O-][N+](=O)c1cc(cs1)C(=O)Nc2ccccc2F           | 1 |   |   |
| CC[C@@H](C)NC(=O)\C=C\c1oc(cc1)[N              | 1 |   |   |
| CC(=O)[C@@                                     | 0 | 0 | 0 |
| COc1cccc(OC                                    | 0 | 0 |   |
| CO\N=C\C(=                                     | 0 | 0 |   |
| ClCc1cc2cccc3ccc4c5ccccc5cc1c4c23              | 1 |   |   |
| OCCN1CCN(CCO)CC1                               |   |   | 0 |
| COC(=O)c1ccc(cc1)N=Nc2ccc(cc2)N(C)C            | 1 |   |   |
| CCCN(CC1CC1)c2c(cc(cc2N(=O)=O)C(F)(F)F)N(=O)=O |   |   | 1 |
| COc1ccc(cc1)C(=O)\C(=C/C(=O)[O-])\Br           |   |   | 0 |
| COc1ccccc1N                                    | 1 | 1 |   |
| C[C@@H]1CC[C@H]2C(C)(C)C3C[C@@]12CC=C3C        |   |   | 0 |
| C[C@@H]1O                                      | 0 | 0 |   |
| C[C@H]1C(=                                     | 0 | 0 | 0 |
| CCCCCCCC(=O)N(C)C                              |   |   | 0 |
| C\C(=N/O)\C(=N\O)\C                            |   |   | 0 |
| Cc1cc2c(nc(N)n2C)c3nccnc13                     | 1 |   |   |
| OC(=O)C(Cl)CCl                                 | 0 |   |   |
| OC1C=Cc2cc3c4ccccc4cc5c6ccccc6c(c2C            | 1 |   |   |
| CC12OOC1(CO)Oc3ccccc23                         | 0 |   |   |
| CCOC(=O)[C(                                    | 0 | 0 | 0 |
| CCC1(CC)C(=                                    | 0 | 0 | 0 |
| CC(=O)ON(OCc1ccc(Br)cc1)C(=O)c2cccc            | 1 |   |   |
| CC1CC2C(Cc3cn(CC=C)c4cccc2c34)N(C1)            | 1 |   |   |
| CCN(CC)CCO(                                    | 0 | 1 | 0 |
| S=C1NCCN1                                      | 1 |   | 0 |
| CC(C)(O\N=C/C(=O)N[C@H]1[C@H]2SCC(=C(N2C1=C    |   |   | 0 |
| Cc1ccc2ccc3cc4ccccc4cc3c2c1                    | 1 |   |   |
| CCC(C)(C)c1cc(c(O)c(c1)C(C)(C)CC)n2nc          | 0 |   | 0 |
| C=CC(=O)OCCOCCOC(=O)C=C                        | 0 |   | 0 |
| N[C@@H](CN1C=C(I)C(=O                          |   | 0 |   |
| COc1ccccc1C                                    | 0 | 0 |   |
| COP(=S)(OC)Oc1ccc(c(C)c1)N(=O)=O               | 0 |   |   |
| CCCCC1=CCCC1=O                                 |   |   | 0 |
| N#Cc1ccc(cc                                    | 0 | 0 | 0 |
| CCCCCN(CCCC)N=O                                | 1 |   |   |
| Clc1ccc(Nc2nnc(Cc3ccncc3                       |   | 0 | 1 |
| C[C@H](CN1CCOCC1)C(C(=O)N2CCCC2)(c3ccccc3)c4c  |   |   | 0 |
| COc1ccc(cc1)N(=O)=O                            | 1 |   |   |
| Nc1cc(Cl)cc(C(=O)O)c1Cl                        | 1 |   | 0 |
| [O-][N+](=O)c1cccc2c(cccc12)C#N                | 1 |   |   |
| CN(C)C(N(C)C)(c1ccccc1)c2ccccc2                | 0 |   |   |
| CC(=C)C(=O)OCCCCOC(=O)C(=C)C                   | 0 |   | 0 |

|                                            |   |  |   |
|--------------------------------------------|---|--|---|
| CCNC(=O)\C=C\c1oc(cc1)[N+](=O)[O-]         | 1 |  |   |
| OC(=Nc1cccc1Cl)c2csc(c2)N(=O)=O            | 1 |  |   |
| CCOc1ccc(Cc2nc3cc(ccc3n                    | 0 |  |   |
| OC1CCC(O)(CN(CC(=O)O)N=O)C(O)C1O           | 0 |  |   |
| Oc1cccc2cc3c4cccc4c5cccc5c3cc12            | 1 |  |   |
| Clc1cncc(n1)N2CCNCC2                       | 0 |  |   |
| CCC(=O)C1CC(CC=C1C)C(C)C                   |   |  | 0 |
| NNc1ccc(cc1)C(=O)O                         | 0 |  | 0 |
| OCc1cc2c3cccc3cc4ccc5cccc1c5c24            | 0 |  |   |
| O[C@@H](\C=C\[C@H]1[                       | 0 |  |   |
| CCCCCCCCC                                  | 0 |  | 0 |
| Oc1ccc2cc(ccc2c1N=Nc3ccc(cc3)S(=O)(:       | 0 |  |   |
| Clc1cccc1c2cccc2Cl                         |   |  | 1 |
| COC1\C=C\O                                 | 0 |  | 0 |
| CC(C)O                                     | 0 |  | 0 |
| Nc1cccc2c1ccc3cccc23                       | 1 |  |   |
| CCC(C)(Oc1c                                | 0 |  | 0 |
| COc1cc(NS(=O)(=O)C)ccc1Nc2c3cccc3r         | 1 |  |   |
| CC(=O)Nc1ccc(\C=N\n2nnc3ccnc3c2O)c         | 1 |  |   |
| COc1cccc2c1OC3(C)OOC23C                    | 1 |  |   |
| Oc1ccc2cc(ccc2c1N=Nc3cccc3)S(=O)(=         | 0 |  |   |
| Cc1cc(C#N                                  | 0 |  | 0 |
| OC1(CCN(CCC                                | 1 |  | 1 |
| ClCCN(CCCl)P1(=O)OCCCN1CCCl                | 1 |  |   |
| CCCCCCCCCCCCCCCC(=O)OCC1(O)CC23C           | 0 |  |   |
| N(N=Nc1cccc1)c2cccc2                       | 1 |  | 1 |
| N[C@H](CCP(=O)(O)O)C(=                     | 0 |  |   |
| CNc1ccc(cc1)N=Nc2ccc(NC)cc2                | 0 |  |   |
| CC(=O)Oc1cc                                | 0 |  | 0 |
| CN(C)CCc1cc(C2=C(C(=O)                     | 0 |  |   |
| NC(=O)CNC(=O)C=N#N                         | 1 |  |   |
| CCCCCCCCOc1cccc1NC(=O)OC(C)CN(CC)          | 0 |  |   |
| CCCCc1ccc(cc1)\N=C/c2ccc(OC)cc2            | 1 |  |   |
| CCCC\C=C\c1cccc1)\C=(                      | 0 |  | 0 |
| CN1CCc2cccc3c2[C@H]1C                      | 0 |  | 0 |
| COc1ccc(CCN(C)CCCOc2cc                     | 1 |  |   |
| CCN(CC)C(=S)SC1OC(CO)C(O)C(O)C1O           | 0 |  |   |
| COc1cc(NS(=O)(=O)c2ccc(N)cc2)nc(C)n1       |   |  | 0 |
| CCOc1cccc1                                 | 0 |  |   |
| CC(C)c1cccc(C(C)C)c1N2C(=O)c3ccc(O)cc3C2=O |   |  | 1 |
| CCCCON(OC(=O)C)C(=O)c1ccc(cc1)c2ccc        | 1 |  |   |
| CC(=O)O[C@H]1[C@@H]2OC(=O)[C@H](OC(=O)C)[C |   |  | 0 |
| N[C@]1(CC[C@@H](C1)C                       | 0 |  |   |

|                                              |   |   |   |
|----------------------------------------------|---|---|---|
| COc1cccc1\C=C\C=O                            |   |   | 0 |
| CN1CCCN=C1\C=C\c2sccc2C                      |   |   | 0 |
| COC(=O)c1sccc1S(=O)(=O)N                     |   |   | 0 |
| CCC(C)(C)C1CCC(CC1)OC                        |   |   | 0 |
| CC(C)(C)c1ccc(OC(=O)c2cccc2O)cc1             |   |   | 1 |
| Cc1cc2c(C)c3cccc3nc2c4cccc14                 | 1 |   |   |
| O=NN1CCC(CC1)c2cccc2                         | 1 |   |   |
| COc1ccc2C[C@H]3N(C)CCc4cc(OC)c(Oc5           | 1 |   |   |
| CCOC(=O)C1(CCCN(C)CC1)c2cccc2                |   |   | 0 |
| CCCCOP(=O)(OCCCC)Oc1cccc1                    | 0 |   |   |
| O=C1NC=NC(=O)N1                              | 0 |   |   |
| CC(Oc1ccc(O)cc1)(P(=O)(C                     | 0 |   |   |
| Cc1cccnc1                                    | 0 | 0 |   |
| OCC(O)CS                                     | 0 | 0 | 0 |
| COc1cccc2C(=O)c3c(O)c4C                      | 1 |   |   |
| COCCOC(=O)c1cccc1C(=O)OCCOC                  | 1 |   | 0 |
| C=Cc1cccc1C=C                                | 0 |   | 0 |
| CC(C)C[C@H](NC(=O)OCC1c2cccc2c3cccc13)C(=O)C |   |   | 0 |
| CN(C)[C@H]1[C@@H]2CC3C(=C(O)[C@]2(O)C(=O)C(  |   |   | 0 |
| CC1=CCC(=O)O1                                | 0 |   |   |
| OC(=O)C1CC(                                  | 0 | 0 |   |
| O=N(=O)c1ccc2c3cccc(c3cc(c2c1)N(=O)          | 1 |   |   |
| CCOc1ccc(N)cc1                               | 1 |   | 0 |
| Oc1cccc1C(=O)c2cccc2                         |   |   | 0 |
| OCc1c[nH]cn1                                 |   | 0 |   |
| Fc1ccc(cc1)C                                 | 1 | 1 | 0 |
| COc1ccc(cc1)C(=O)\C=C\c2cccc2                | 0 |   |   |
| O=NN1CCCCCCCCCCC1                            | 1 |   |   |
| CCC\C=C\C=C\C(=O)O[C@H]1\C(=C\C(=O)OC)\C[C@H |   |   | 1 |
| lc1ccc(cc1N(=O)=O)N(=O)=O                    | 1 |   |   |
| CC(=O)N(O[C@@H]1O[C@H](CO)[C@@               | 1 |   |   |
| Nc1ccc(cc1N(=O)=O)c2ccc(N)c(c2)N(=C          | 1 |   |   |
| CN1C=CN(CCC[n+])2ccc(cc2)C(=O)N)C1\          | 0 |   |   |
| COc1cccc1N2CCN(CCN(C(                        | 0 |   |   |
| CC(=N(=O)O)CO                                | 0 |   |   |
| O=CC=Cc1ccc(cc1)N(=O)=O                      | 1 |   |   |
| CC[C@]12CC[C@H]3[C@@H](CCC4=CC(              | 0 |   |   |
| [O-][N+](=O)c1ccc2ccc3c4cccc4cc5ccc          | 1 |   |   |
| C[C@@H](O)CN(C)N=O                           | 1 |   |   |
| COC(=O)c1ccc(OC)cc1                          |   |   | 0 |
| C[C@]12CC[C@H]3[C@@I                         | 0 |   |   |
| CN(C)C(=O)C                                  | 0 | 0 |   |
| C1CN(CCN1)c2ccc3cccc3r                       | 0 |   |   |

|                                               |   |   |   |
|-----------------------------------------------|---|---|---|
| O=C1CCC(C2(                                   | 1 | 0 | 0 |
| COc1ccc2C[C@@H]3[C@@H]4C=C[C@H](O)[C@@H]      |   |   | 0 |
| C(OCC1CCC2OC2C1)C3CCC4OC4C3                   |   | 1 |   |
| CC(=O)N1CC(                                   | 0 | 0 |   |
| CN(N=O)C(=O)N[C@H]1C(                         |   | 0 |   |
| C[n+]1c(c2ccc(N)cc2)c3cc(N)ccc3c4ccc(         |   | 1 |   |
| C1SCCCO1                                      |   | 0 |   |
| COC[C@@H](N1CCN(C[C@H]1C)C2(C)CCN(CC2)C(=O)   |   |   | 0 |
| CN1C2CCC1C                                    | 1 | 1 |   |
| O=N(=O)c1ccc2ccc3cccc(c3c2c1)N(=O)=           |   | 1 |   |
| CC(=CCCC(C)(O)C=C)C                           |   | 0 | 0 |
| NS(=O)(=O)c                                   | 0 |   |   |
| CC1=NN(C(=O)C1N=Nc2cccc2)c3ccc(cc3)S(=O)(=O)[ |   |   | 0 |
| Cc1ccc(C)c(N)c1                               |   | 1 |   |
| C[C@@]12CCC[C@](C)([C(                        |   | 0 |   |
| NC(CCC(=O)NC(CSCC)NC(=O)CC(=O)O               |   | 1 |   |
| Nc1nc(\C=C/c2oc(cc2)[N+](=O)[O-])cs1          |   | 1 |   |
| CCOC(=O)[C(                                   | 0 | 0 | 0 |
| OC1C2OC2c3c(ccc4c5cccc6cccc(c34)c56           |   | 1 |   |
| Oc1c(cc(cc1[N+](=O)[O-])c2cccc2)[N+]          |   | 1 |   |
| CCOc1ccc(cc1)N=N(=O)c2ccc(OCC)cc2             |   | 0 |   |
| CC(CCCCC(=O)Nc1ccc(cc1)                       |   | 0 |   |
| Cn1cnc2ncnc(N)c12                             |   |   | 0 |
| Cc1ccc(cc1N=N(=O)c2cc(ccc2C)N(=O)=C           |   | 0 |   |
| CCC(=O)\C=C\C1C(=CCCC1(C)C)C                  |   | 0 | 0 |
| C=CCOc1nc(OCC=C)nc(OCC=C)n1                   |   |   | 0 |
| Nn1cnnc1                                      |   |   | 0 |
| BrC(C(=O)NCc1cccc1)c2cccc2                    |   | 0 |   |
| NC1=NC(=O)c2nc(Br)n([C(                       |   | 0 |   |
| N[S+](=O)([O-])c1cc2c(N[                      |   | 0 |   |
| Cc1cc(cc2cccc12)[N+](=O)[O-]                  |   | 1 |   |
| COc1nc(C)nc(NC(=O)NS(=O)(=O)c2cccc2Cl)n1      |   |   | 0 |
| OC1CC(O)(CC(O)C1O)C(=O)O                      |   | 0 |   |
| CCCC[C@@H](CC)C=O                             |   | 0 |   |
| OCCNC(=O)\C=C\c1cccc1                         |   | 0 | 0 |
| COc1c(Cl)c(Cl)c(c(Cl)c1Cl)[N+](=O)[O-]        |   | 0 |   |
| [O-][N+](=O)c1ccc(cc1)C(=O)Cl                 |   | 1 |   |
| CCCN=C(O)C=Cc1oc(cc1)N(=O)=O                  |   | 1 |   |
| CC(C)(C)N(NC(=O)c1ccc(Cl)cc1)C(=O)c2cccc2     |   |   | 1 |
| COc1ccc2C(=O)C(=COc2c1                        |   | 0 |   |
| CC(=O)\C=C\c1cccc1                            |   |   | 0 |
| OC(CCC1C(N(C1=O)c2ccc(F                       |   | 0 |   |
| CC1C2C(=Nc3cccc23)N(C)c4cccc14                |   | 1 |   |

|                                              |   |   |   |
|----------------------------------------------|---|---|---|
| NCC1CCC(CC:                                  | 0 | 0 | 0 |
| C[C@](O)(C[S+](=O)([O-])                     |   | 0 |   |
| CCC(=O)OC(C)(CCC=C(C)C)C=C                   |   |   | 0 |
| CCN(C(=O)N(CC)c1ccccc1)c2ccccc2              |   | 0 | 1 |
| Cc1ccc(cc1)C(C)(C)O                          |   | 0 | 0 |
| CC1(C)[C@H](CC[C@@]2(C)C1CC[C@]3(C)[C@@H]2C  |   |   | 0 |
| OC(=O)c1cc(cc(c1)N(=O)=O)C(=O)O              |   |   | 0 |
| [O-][N+](=O)                                 | 0 |   | 1 |
| CCCCCCCCC                                    | 0 | 0 | 0 |
| Fc1ccc(cc1)C                                 | 1 | 1 |   |
| Cc1cc2CCN(C                                  | 0 | 0 |   |
| COc1cc(O)c2c(O)c3C(=O)OC(=Cc3c(OC)c          |   | 1 |   |
| N[S+](=O)([O-])c1cc2c(N[                     |   | 0 |   |
| NC(CSC(=C(Cl)Cl)Cl)C(=O)O                    |   | 1 |   |
| [O-]C(=O)C1=C(CSc2nncs2)CS[C@@H]3[C@H](NC(=C |   |   | 0 |
| Oc1ccccc1\C=N\NC(=O)c2                       |   | 0 |   |
| CCCCOC(=O)c1ccccc1                           |   |   | 0 |
| Oc1ccc(cc1N(=O)=O)c2ccccc2                   |   | 0 |   |
| CN(C)c1ccc(cc1)N=Nc2ccccc2CO                 |   | 1 |   |
| CCOc1ccc(NC                                  | 0 | 0 | 0 |
| CNC(C)C(O)c:                                 | 0 | 0 | 0 |
| O=C1NC(=O)c2ccccc12                          |   | 0 | 0 |
| COC(C)(C)C                                   |   | 0 | 0 |
| FC(F)(F)c1ccc(Cl)c(c1)N(=O)=O                |   | 0 | 0 |
| CN(C)CCn1nnnc1SCC2=C(N3[C@H](SC2)[C@H](NC(=C |   |   | 0 |
| CCN(CC)CCNC(=O)c1cc(ccc1OC)S(=O)(=O)C        |   |   | 0 |
| CC([C@H](O)                                  | 0 | 0 |   |
| CCCC(c1cc(c(O)cc1C)C(C)(C)C)c2cc(c(O)c       |   | 0 | 1 |
| Oc1cc2ccccc2c3ccccc13                        |   | 1 | 1 |
| OCC1OC(Oc2cc(O)c3C(=O)                       |   | 0 |   |
| CC(=O)c1ccc:                                 | 1 | 1 |   |
| COc1ccc(cc1[N+](=O)[O-])[N+](=O)[O-]         |   | 1 |   |
| CC(C)NCC(O)c1ccc(N[S+](=                     |   | 0 |   |
| Cc1ncc(CO)c(                                 | 0 | 0 |   |
| Cn1c(NO)nc2c3ccnc3ccc12                      |   | 1 |   |
| COc1nc2cc(cc(CBr)c2nc1OC)[N+](=O)[O          |   | 1 |   |
| Cc1ccc(C)c2c3cc(ccc3[nH]c12)N(=O)=O          |   | 1 |   |
| NC[C@H](CC(=O)O)c1ccc(                       |   | 0 |   |
| CN(C)CCc1c[nH]c2ccccc(OP(=O)(O)O)c12         |   |   | 0 |
| O=C1C[C@H]                                   | 1 | 0 |   |
| CS(=O)(=O)Cl                                 |   |   | 0 |
| C\C=C/C=C\C=C/C(=O)O)\C)\C=CC1=C(C)CCCC1(C)C |   |   | 1 |
| OC1(CCN(Cc2                                  | 1 | 1 |   |

|                                                 |   |   |
|-------------------------------------------------|---|---|
| CC\C=C/CCCCCCCCCOC(=O)C                         |   | 0 |
| OC1C=Cc2c(ccc3c4cccc4sc23)C1O                   | 1 |   |
| CCOc1cccc(c1)[C@@]2(CC[C@@H](C)CC2)N3CCN(CC     |   | 0 |
| C[C@@]1(CO)[C@H](O)CC[C@@]2(C)[C@H](C\C=C\C     |   | 0 |
| CCCN1C(=O)I                                     | 0 | 0 |
| CC(C)C=O                                        | 0 | 0 |
| COc1c(C=O)c(O)cc2C(=O)c3cccc3C(=O)              | 0 |   |
| C[n+]1ccn(CC=C)c1                               |   | 0 |
| CC\C=C\C[C@@H](CC)C=O                           | 0 |   |
| CC(C)(O)Cc1cccc1                                |   | 0 |
| OC1COC(C(O)C1O)N(Cc2c[nH]c3cccc2                | 1 |   |
| [O-][N+](=O)c1ccc2ccc3cccc4C(=O)Oc1c            | 1 |   |
| CC(C)OC(=O)                                     | 0 | 0 |
| CC(=O)OCCN(CCOC(=O)C)c1ccc(cc1)N=Nc2ccc(cc2C#N  |   | 1 |
| CC(C)Cc1ccc(                                    | 0 | 0 |
| C[C@@H](O)c1nccc(n1)N2[C@@H](C)CN(C[C@H]2C      |   | 0 |
| C[C@H](CCl)OP(=O)(O[C@H](C)CCl)O[C              | 0 |   |
| C1CC[C@H]2O[C@H]2C1                             | 1 |   |
| Oc1cccc1C(=O)OCc2cccc2                          | 0 |   |
| Nc1nc(CC(=O)O)cs1                               |   | 0 |
| C[C@H](O)[C                                     | 0 | 0 |
| C\C=C\C(=O)Oc1c(CCCCC(C)C)cc(cc1N(=O)=O)N(=O)   |   | 1 |
| CC(C)(C)OC(=                                    | 0 | 0 |
| CN(C)CCCN1c                                     | 1 | 1 |
| OC(=O)\C=C\c1ccc(O)c(O)                         |   | 0 |
| Nc1ccc(\C=C\c2ccc(cc2)C#N)cc1                   | 1 |   |
| CCCCCCCCCCCCOC[C@H]1CO1                         | 0 |   |
| [O-]S(=O)(=O)c1cccc2c(cccc12)S(=O)(=O)[O-]      |   | 0 |
| C[C@]12[C@@H](O)C=C[C@@]3(OC1=                  | 0 |   |
| COc1cc(CC(C)N)cc2OCOc12                         |   | 0 |
| C[C@H]1[C@                                      | 0 | 0 |
| FC(F)(F)c1ccc(Oc2ccc(cc2)N(=O)=O)c(c1)N(=O)=O   |   | 1 |
| CCOc1cc(CC(                                     | 0 | 0 |
| CN1C2CCC1C                                      | 0 | 0 |
| CC1CCC2C(OC(=O)C2=C)C3(C)C1C=CC3(=              | 0 |   |
| CCCCC\C=C\CCCCCCCC(=O)O                         |   | 0 |
| COCCCOc1cc[C[C@@H](C[C@H](N)[C@@H](O)C[C@       |   | 0 |
| NC(=N)c1ccc2c(N)c([nH]c2c1)C(=N)N               | 0 |   |
| COc1cc(OC)nc(Oc2cccc(Oc3nc(OC)cc(OC)n3)c2C(=O)[ |   | 0 |
| CNC(=O)[C@                                      | 0 |   |
| COc1cccc(C2:                                    | 0 | 0 |
| CC1C(C)C(C)(O)C(=O)OCC2=CCN3CCC(O               | 0 |   |
| Nc1[nH]cnc2nc(nc12)c3ccc(cc3)[N+](=C            | 1 |   |



|                                                 |   |  |   |
|-------------------------------------------------|---|--|---|
| O=C1NN=Cc2ccccc12                               |   |  | 0 |
| O[C@H]1C=C2c3ccc4ccccc4c3c5cccc([C(             | 1 |  |   |
| Nc1cccc(c1CO)N(=O)=O                            | 0 |  |   |
| Nc1nc(c(CCO)c2ncnn12)c3ccccc3                   | 0 |  |   |
| COc1cc2CCN(C)C3Cc4cc5OCOc5cc4c(c1(              | 0 |  |   |
| [O-][N+](=O)c1cccc(l)c1                         | 0 |  |   |
| Oc1ccc(\C=C' 0 0                                |   |  |   |
| CN1CCN(CC1)c2ccc3[nH]c(nc3c2)c4ccc5             | 0 |  |   |
| CC1=Nc2ccccc2C(=O)O1                            |   |  | 0 |
| OC(=O)[C@€ 0 0                                  |   |  | 0 |
| CNC(=O)O\N=C\C(C)(C)S(=O)(=O)C                  |   |  | 0 |
| Nc1ccc(Sc2ccc(cc2)[N+](=O)[O-])cc1              | 1 |  |   |
| CN([C@H]1C 1 1                                  |   |  |   |
| CN1[C@@H] 1 1                                   |   |  |   |
| O=C1CC2(CCCC2)CC(=O)N1                          | 0 |  |   |
| Nc1cc2[nH]c3ccccc3c2cc1N(=O)=O                  | 1 |  |   |
| NCC(O)c1ccc 0 0                                 |   |  | 0 |
| N[C@@H](Cc1cc(l)c(O)c(l)c1)C(=O)O               |   |  | 0 |
| CCCSC(=O)N(CCC)CCC                              |   |  | 0 |
| Cc1ccc(cc1)C(=O)c2ccccc2                        |   |  | 0 |
| CC(=O)CC(C1=C(O)c2ccccc2OC1=O)c3ccc(Cl)cc3      |   |  | 1 |
| C1O[C@@H]1c2c3ccccc3cc4c2ccc5cccc               | 1 |  |   |
| CC[C@@H](C)Nc1ccc(N[C@H](C)CC)cc1               | 0 |  |   |
| OC[C@H]1O[C@H]([C@H](O)[C@@H]1                  | 1 |  |   |
| Nc1ccc(F)cc1F                                   | 1 |  | 0 |
| [O-][N+](=O)c1cccc(c1)c2ccc(cc2[N+](=           | 1 |  |   |
| C[C@@H]1C 0 0                                   |   |  |   |
| Nc1ccc2C(=C3C=CC(=N)C=C3Oc2c1)c4cc              | 0 |  |   |
| CCCOc(=O)c1 0 0                                 |   |  | 1 |
| Cc1c(Cn2ccn                                     | 0 |  | 0 |
| CCCCCCCCCCCCS                                   | 0 |  | 0 |
| CNc1ccc2ncc(C)nc2c1C                            | 1 |  |   |
| CN(Cc1ccc(cc1)N(=O)=O)N=O                       | 1 |  |   |
| OC(=O)C1Cc2c([nH]c3ccccc23)C(N1)c4c             | 0 |  |   |
| CC(=O)OC(C)(C)Cc1ccccc1                         |   |  | 0 |
| N1C2C1c3cc4c(ccc5ccccc45)cc3c6ccccc2            | 1 |  |   |
| CCCCCOc1cccc(NC(=O)OC2CCCCC2N3CC                | 0 |  |   |
| Cc1ccc(Cl)cc1[N+](=O)[O-]                       | 0 |  |   |
| Cc1cc(ccc1N)N(=O)=O                             | 1 |  | 0 |
| Oc1cc(O)c2C(=O)c3ccccc3C(=O)c2c1                | 1 |  |   |
| CC(=O)N(CC(O)CN(C(=O)C)c1c(l)c(C(=O)NCC(O)CO)c( |   |  | 0 |
| Cc1ccc(cc1)S 0 0                                |   |  | 0 |
| [O-]C(=O)c1cccn1                                |   |  | 0 |

|                                                  |   |   |   |
|--------------------------------------------------|---|---|---|
| CCCCCCCCC(=O)OCC                                 |   |   | 0 |
| Cc1cc(C)cc(C)c1                                  |   | 0 | 0 |
| CCCN[C@H]1                                       | 0 | 0 | 0 |
| COc1cccc1\C=C\C(=O)C2=                           |   | 0 |   |
| C[C@H](Cl)CN(C)C                                 |   |   | 1 |
| CN1C[C@@H](C=C2[C@H]1Cc3c[nH]c                   |   |   | 0 |
| C[n+]1ccn(CCO)c1                                 |   |   | 0 |
| CC12OOC1Oc3cccc23                                |   |   | 1 |
| CO[C@H]1C[C@](C)(O)Cc2cc3C(=O)c                  |   |   | 1 |
| CC1CN(N=O)C(=O)NC1=O                             |   |   | 1 |
| Cc1c2cccc2cc3c1ccc4cccc34                        |   |   | 1 |
| COc1cc(ccc1O)C2=CC(=O)c                          |   | 0 |   |
| C[C@]12N[C                                       | 0 | 0 |   |
| OCCN(CC(=O)O)N=O                                 |   |   | 1 |
| [O-][N+](=O)c1cc(CCl)cc(c1)[N+](=O)[O            |   |   | 1 |
| COC(=O)CNC(=O)C(CSCCl)NC(=O)CCC(                 |   |   | 1 |
| CNC(=N)NN(=O)=O                                  |   |   | 0 |
| CCOC(=O)N(C)C                                    |   |   | 1 |
| CC(C)(N=NC(C)(C)C(=N)N)C(=N)N                    |   |   | 1 |
| CCCCCCCCCOCC(=O)C=C                              |   |   | 0 |
| CN1CCc2cc3OCOc3cc2[C@                            |   | 0 |   |
| C[N@H+]1CC                                       | 0 | 0 |   |
| N\C(=N/O)\c1oc(cc1)[N+](=O)[O-]                  |   |   | 1 |
| COC(=O)c1c(CC(C)C)c(C2=NCCS2)c(nc1C(F)F)C(F)(F)F |   |   | 0 |
| NNc1ccc(cc1[N+](=O)[O-])[N+](=O)[O-]             |   |   | 1 |
| CC(=O)CCC(=O)O                                   |   |   | 0 |
| CNC(=O)Oc1cc(C)c(N(C)C)c(C)c1                    |   |   | 0 |
| C(Oc1ccc2sncc2c1)C3CO3                           |   |   | 1 |
| OCC(Cl)Cl                                        |   |   | 1 |
| O=C1OC(CN2CCOCC2)CN1\N=C\c3oc(cc3)N(=O)=O        |   |   | 0 |
| Oc1cccc2Oc3c4C5C=COC5Oc4cc(O)c3C:                |   |   | 1 |
| NC(=N)N=C(N)NCCc1cccc1                           |   |   | 0 |
| Cc1cccc1NS(=O)(=O)c2cccc3ccnc23                  |   |   | 0 |
| CC1=CC(O)C2CC1C2(C)C                             |   |   | 0 |
| CCN(CC)c1cccc(O)c1                               |   |   | 1 |
| Clc1ccc(NC(=O)Nc2ccc(Cl)                         |   | 0 | 1 |
| Clc1ccc(cc1Cl)N2C(=O)CCC2=O                      |   |   | 0 |
| C[C@H](C(=C                                      | 0 | 0 | 0 |
| CCCCCCCCCCCCC(=O)OC[C@@H](COP(=O)([O-])O         |   |   | 0 |
| CC(C)CC(=O)Nc1snc2cccc12                         |   |   | 0 |
| CCC(C)c1cc(c(O)c(c1)C(C)(C)C(C)(C)C              |   |   | 1 |
| C[C@]12CC[C@H]3[C@@H](CCc4cc(OC(=O)N(CCCl)C      |   |   | 0 |
| Cc1cc2C(=O)CCc2c3ccc4cccc4c13                    |   |   | 1 |

|                                        |   |   |   |
|----------------------------------------|---|---|---|
| COc1ccc(C[C@@](C)(N)C:                 | 0 |   |   |
| CN(C)[P+](On1nnc2cccc12)(N(C)C)N(C)    | 0 |   |   |
| O=Cc1ccc2OCOC2c1                       | 0 |   | 0 |
| CCCCN(N=O)C(=N)NN(=O)=O                | 1 |   |   |
| Nc1cccc1C(=O)OCCc2cccc2                | 0 |   |   |
| CC1CC2(OC2C)C(=O)OC3CCN(C)CC=C(CC      | 1 |   |   |
| ClC(C(=O)NCc1cccc1)c2cccc2             | 1 |   |   |
| OCC(CO)NC1                             | 0 | 0 |   |
| Cc1cc(O)c2C(=O)c3c(O)ccc(O)c3C(=O)c2   | 1 |   |   |
| Oc1nc(O)nc(i                           | 0 | 0 | 0 |
| O[N+](=C1c2cccc2C(=O)c3cccc13)[O-]     | 0 |   |   |
| OCC1=CCN2CC[C@@H](O)[C@@H]12           | 0 |   |   |
| CCCCC(CC)CC                            | 0 | 0 | 0 |
| OC[C@H]1O[C@@H](Oc2cc3C=CC(=O)C        | 0 |   | 0 |
| CCOP(=S)(OCC)OP(=S)(OCC)OCC            | 1 |   |   |
| CN1C=CN(CCOCC#C)C1\C=N\O               | 0 |   |   |
| CN(C)CCCCC                             | 0 | 0 | 0 |
| NC(CSc1c(Cl)c(Cl)c(Cl)c(Cl)c1Cl)C(=O)O | 0 |   |   |
| OC1C=CC=CC1O                           | 1 |   |   |
| CCC(=CC)C(=O)NC(=O)N                   |   |   | 0 |
| CCCCN1CCCC1CNC(=O)c2c                  | 1 |   |   |
| Cc1cnc2c(n1)c(C)cc3c2nc(N)n3C          | 1 |   |   |
| [O-][N+](=O)c1cccc2c1ccc3cccc(c23)[N-  | 1 |   |   |
| [O-][N+](=O)c1oc(C(=O)CBr)c(c2cccc2)   | 1 |   |   |
| CC[C@@]1(C                             | 0 | 0 |   |
| Clc1cccc2ncccc12                       | 1 |   |   |
| N\C=C(/N)\C#N)\C#N                     |   |   | 0 |
| OC(=O)c1ccc(cc1)[S+](=O)               | 0 |   |   |
| CCCCCCCC\C=                            | 0 | 0 | 1 |
| O=C1Nc2cccc2C(=O)O1                    |   |   | 0 |
| Oc1ccc2cccc2c1CC3=C(NC                 | 0 |   |   |
| CCCCCN(CCCCC)C(=O)Cc                   | 0 |   |   |
| COc1cccc(c1)N(=O)=O                    | 0 |   |   |
| COS(=O)(=O)C                           | 1 |   | 0 |
| CC1(Cn2ccnn2)[C@@H](N                  | 0 |   |   |
| Oc1[nH]nc2cccc12                       | 0 |   |   |
| COc1cc(C)cc2c(OC(=O)C)c(cc(OC(=O)C)c   | 0 |   |   |
| CC1=CC(=O)[C@@H]2C[C(                  | 0 |   |   |
| OCC(CO)OP(=O)([O-])[O-]                |   |   | 0 |
| COC(=O)CCl                             | 0 |   |   |
| CCC1CO1                                | 1 |   | 0 |
| OC(=O)CCl                              |   |   | 0 |
| N#Cc1ccncc1                            |   |   | 0 |

|                                               |   |   |   |   |
|-----------------------------------------------|---|---|---|---|
| CCC(C)c1ccc(O)cc1                             |   |   |   | 1 |
| CC1=C(C=C)c2cc3[nH]c(cc4                      | 0 |   |   |   |
| Nc1ccc(\C=C'                                  | 0 | 0 |   |   |
| Nc1cc(Cl)ccc1O                                |   |   | 1 |   |
| C[C@@H](NC(=O)[C@@H](NC(=O)c1nc(nc(N)c1C)[C   |   |   |   | 0 |
| Cc1ccc2c(ccc3ccccc23)c1                       |   |   | 1 |   |
| [O-][N+](=O)c1ccc(Cl)c(c1)[N+](=O)[O-         |   |   | 1 |   |
| CC1CN(CCN1N=O)N=O                             |   |   | 1 |   |
| OC(=O)\C(=C                                   | 0 | 0 |   |   |
| CC(=CC1C(C:                                   | 1 | 0 | 1 |   |
| COc1cc2nc(nc(NC3CCN(Cc                        |   | 1 |   |   |
| CN(C)S(=O)(=O)N(SC(F)(Cl)Cl)c1ccccc1          |   |   | 0 | 1 |
| CCCCC(=C)C=O                                  |   |   | 1 |   |
| C1O[C@@H]1c2ccc3ccccc3c2                      |   |   | 1 |   |
| [O-]N=O                                       |   |   |   | 0 |
| COc1ccc(cc1)C2=CC(=O)c3                       |   | 0 |   |   |
| COc1cc(ccc1N)[N+](=O)[O-]                     |   |   | 1 |   |
| CN1C(=C(O)c2ccccc2S1(=O)=O)C(=O)Nc3ccccc3     |   |   |   | 1 |
| C1N2CN3CN(CN1C3)C2                            |   |   | 1 | 0 |
| [O-][N+](=O)c1ccc(I)c(c1)[N+](=O)[O-]         |   |   | 1 |   |
| Oc1cccc2C(=O)c3ccccc3C(=O)c12                 |   |   | 1 |   |
| C[C@@H](Cc                                    | 1 | 0 |   |   |
| COc1cc(O)c2C(=O)c3c(O)cc(C)cc3Cc2c1           |   |   | 1 |   |
| CCCCOC(=O)c1ccccc1C(=O)OCc2ccccc2             |   |   | 0 | 0 |
| NC(=O)CCC1I                                   | 0 | 0 |   |   |
| BrCc1cccc(CBr)c1                              |   |   | 0 |   |
| CNP(=S)(N1CC1)N2CC2                           |   |   | 1 |   |
| OC1CCCc2ccccc12                               |   |   |   | 0 |
| ClCC(=O)c1ccccc1                              |   |   | 0 | 0 |
| C[C@@H]1CC2(OC3C[C@@]4(C)C5=CC[C@H]6C(C)(C    |   |   |   | 1 |
| Cc1cc2CCCc2c3ccc4C(O)C(O)C5OC5c4c1            |   |   | 1 |   |
| COC1=C(Oc2cc(O)cc(O)c2(                       |   | 0 |   |   |
| OC(=O)[C@@H](Cl)Br                            |   |   | 1 |   |
| C[C@@]12CCC3[C@@](CCC4[C@@]3(C                |   |   | 0 |   |
| CC12CCC(=O)CC1=C3CC3C4C2CCC5(C)C4             |   |   | 0 |   |
| COC(=O)C1=C(C)NC(=C(C1c2ccccc2)N(=O)=O)C(=O)C |   |   |   | 1 |
| C=CC1CC2CC1C=C2                               |   |   | 0 |   |
| Cc1ccc(cc1)C(=O)CN2C(=N                       |   | 0 |   |   |
| CCCCCC(=O)OCCc1ccccc1                         |   |   |   | 0 |
| COC(=O)c1cc                                   | 0 | 0 | 0 | 0 |
| NC(=O)COc1                                    | 0 |   |   |   |
| CCCOc1ccccc1C2=Nc3[nH]                        |   | 0 |   | 0 |
| CCCCOCCOCCOC(=O)CCCC(=O)OCCOCCOCCOCCO         |   |   |   | 0 |

|                                           |   |   |   |
|-------------------------------------------|---|---|---|
| Cc1cc(C)c(cc1[N+](=O)[O-])[N+](=O)[O-     | 1 |   |   |
| C[C@@H]1O[C@@H](O[C                       | 0 |   |   |
| CCCC[S+](=N)([O-])CCC(N)                  | 0 |   |   |
| CCC(=C)C(=O                               | 0 | 0 | 0 |
| CO[C@]1(NC                                | 0 | 0 | 0 |
| OCCN(CCO)c1nc(nc2ccccc12)c3ccc(s3)[f      | 1 |   |   |
| OCCNCCCOc1cccc(Cl)c1Cl                    | 1 |   |   |
| O=C1OC(=O)c2ccccc12                       | 0 | 0 |   |
| Nc1ccc(cc1)S(=O)(=O)[O-]                  |   |   | 0 |
| OCNC(=O)N(CO)C1N(CO)C(=O)N(CO)C1=O        |   |   | 0 |
| C[C@@H]1CC[C@H]([C@@H](O)C1)C(=C)C        |   |   | 0 |
| CN(CCO[N+](=O)[O-])[N+](=O)[O-]           | 1 |   |   |
| C1CCN(CCCl)[P@]1(=O)NCCCO1                | 1 |   |   |
| CN(C)CCCN=C1c2ccccc2Nc3ccc(cc13)N(:       | 1 |   |   |
| Cc1ccc(c(C)c1[N+](=O)[O-])[N+](=O)[O-     | 1 |   |   |
| CCCNC(=O)\C=C\c1oc(cc1)[N+](=O)[O-]       | 1 |   |   |
| C\C\1=C/CC[C@@]2(C)O(                     | 0 |   |   |
| O=C1c2ccccc2c3cccc4cccc1c34               | 1 |   |   |
| CN1N=C(S/C/1=N\C(=O)C)S(=O)(=O)N          |   |   | 0 |
| Nc1c(O)cccc1C(=O)O                        | 0 |   |   |
| C=CC#N                                    | 1 |   | 0 |
| OC1CCCCC1N                                | 0 | 0 |   |
| CCC(C)C(=O)C                              |   |   | 0 |
| Oc1cc(O)c2C(=O)c3c(O)c4C5C=COC5Oc4        | 1 |   |   |
| [O-][N+](=O)c1cc(cs1)C(=O)Nc2ccccc2       | 1 |   |   |
| COc1cc(C=CC)ccc1O                         |   |   | 0 |
| NC(C(=O)O)c                               | 0 | 0 |   |
| CN(C)C1C2CC3C(=C(O)C2(O)C(=O)C(=C1        | 0 |   |   |
| CC(CO)(CO)C(=O)O                          |   |   | 0 |
| C1C=Cc2c1ccc3ccc4ccccc4c23                | 1 |   |   |
| CC(C)(C)c1cc(C=C(C#N)C#N                  | 0 |   |   |
| O=NN1CC(=O)NC1=O                          | 1 |   |   |
| CCOC(=O)C1OC1C(=O)NC(CC(C)C)C(=O)I        | 0 |   |   |
| OC(=O)[C@F                                | 0 | 0 |   |
| OC(=O)c1ccc2cc(O)ccc2c1                   |   |   | 0 |
| CC(=O)Nc1ccc(cc1)C(=O)CCl                 | 1 |   | 0 |
| CCCC(=O)Nc1ncnc2c1ncn2[C@@H]3O[C@@H]4COP( |   |   | 0 |
| CC1CCc2nccnc12                            |   |   | 0 |
| c1ccsc1                                   | 0 |   | 0 |
| FC(C(F)(F)F)C(F)(F)F                      | 0 |   |   |
| CCCCN(N=O)C(=N)NN(=O)=O                   | 1 |   | 0 |
| NC(=O)Nc1ccccc1                           |   |   | 0 |
| Nc1ccc2c(N)c3ccccc3nc2c1                  | 1 |   |   |

|                                                  |   |   |   |   |
|--------------------------------------------------|---|---|---|---|
| CCCCCCCCCCCCOC(=O)c1ccc(O)cc1                    |   |   |   | 1 |
| O=C1C(CCS(=                                      | 0 |   |   | 0 |
| Clc1ccc(cc1)(                                    | 1 | 0 | 0 | 1 |
| CC(C)[C@]1(CCc2ccc(N)cc2)CC(=C(Sc3cc(C)c(CO)cc3C |   |   |   | 0 |
| NN(Cc1ccccc1)Cc2ccccc2                           |   |   |   | 0 |
| Oc1c(N=Nc2ccc(c3ccccc23)S(=O)(=O)O)              |   |   |   | 0 |
| CC(=CCC\C(=C/COc1c2C=C                           | 0 |   |   |   |
| CC(NC(=O)COc1ccc(Cl)cc1Cl)C(=O)O                 |   |   |   | 0 |
| COc1cc2c(CCN[C@]23CSC4[C@H]5[C@                  |   |   |   | 1 |
| CC1CO1                                           |   |   |   | 1 |
| C[C@@H](O)CBr                                    |   |   |   | 1 |
| CCc1cc(O)cc2c3CCO[C@@](CC)(CC(=O)                |   |   |   | 1 |
| CCCCCCCCCCCCOCCOCCOCCOCCOCCOCC                   |   |   |   | 0 |
| CCN(CC)Cc1nccn1c2ccc(cc2C(=O)c3ccccc3Cl)N(=O)=O  |   |   |   | 0 |
| C1=Cc2cc3ccccc3c4cccc1c24                        |   |   |   | 1 |
| CC1COC(=O)O1                                     |   |   |   | 0 |
| OC[C@H]1O[C@@H]2O[C                              | 0 |   |   | 0 |
| ClC(=O)C(Cl)(Cl)Cl                               |   |   |   | 0 |
| OC1Cc2c(O)cc(O)cc2OC1c:                          | 0 |   |   |   |
| CC(=O)OCC(=O)[C@@]1(O)CC[C@H]2[C@@H]3CCCC4       |   |   |   | 0 |
| Nc1ccccc1C(=O)OC2CCCC2                           |   |   |   | 0 |
| CS(=O)(=O)C                                      | 0 |   |   | 0 |
| CCCCCCC\C=C(                                     | 0 | 0 |   |   |
| Nc1ccc(Oc2cccc(Oc3ccc(N)cc3)c2)cc1               |   |   |   | 1 |
| Nc1ccc(cc1)N=Nc2ccccc2                           |   |   |   | 1 |
| CCC(C)C1NC(                                      | 0 | 0 |   |   |
| Cc1ccc2cc3c(ccc4ccccc34)c5C(=O)Cc1c2             |   |   |   | 1 |
| C=CCCC1CO1                                       |   |   |   | 1 |
| COC(=O)CCC(                                      | 0 | 0 |   | 0 |
| C1CCN2C[C@@H]3C[C@@                              | 0 |   |   |   |
| CC1(C)C(=O)N=C2C1=C(O)                           |   |   |   | 0 |
| OC(=O)c1ccc(CCC(=O)CC#N)cc1                      |   |   |   | 1 |
| OC(=O)CCNC                                       | 0 | 0 |   |   |
| N[S+](=O)([O-])c1ccc(Cl)c                        |   |   |   | 0 |
| NC(=O)N1c2                                       | 0 | 0 |   | 0 |
| CCN(CC)CCCN                                      |   |   |   | 0 |
| CN([C@H](Cc1ccc(cc1)c2c                          |   |   |   | 0 |
| CC(=C)C1CCC(C)(O)CC1                             |   |   |   | 0 |
| COP(=O)(OC)OC(Br)C(Cl)(Cl)Br                     |   |   |   | 0 |
| CC(C)OC[C@H]1CO1                                 |   |   |   | 1 |
| OC[C@@H]1O[C@H]2[C@                              | 0 |   |   |   |
| COc1ccnc(CS(=O)c2nc3ccc(OC(F)F)cc3[nH]2)c1OC     |   |   |   | 0 |
| Cc1ccc(C=Cc2ccc(cc2)N(=O)=O)cc1                  |   |   |   | 1 |

|                                                  |   |   |   |
|--------------------------------------------------|---|---|---|
| CC(C)(CO)C(O)C(=O)NCCC(=O)NCCSSCCNC(=O)CCNC(=O)N | 0 |   |   |
| O=N(=O)c1cc2cccc3c4ccccc4c5cccc1c5c              | 1 |   |   |
| CCCCS(=O)(=O)N[C@@H](Cc1ccc(OCCCC2CCNCC2)c1)C    | 0 |   |   |
| ClC1(Cl)[C@@]2(Cl)[C@]3(Cl)[C@@]4(Cl)C           | 0 |   |   |
| O1C2C=Cc3c(cc4ccc5cccc6ccc3c4c56)C1              | 1 |   |   |
| CN1N=CC(=C(Br)C1=O)[S+]                          | 0 |   |   |
| O=C1C=Cc2ccc3C=CC(=O)c4ccc1c2c34                 | 1 |   |   |
| CCCCCON=O                                        | 1 |   | 0 |
| CC(C)CN1C(=O)N(C)C(=O)C1                         | 0 |   |   |
| CCOC(=O)CNC(=O)C=[N+]=[N-]                       | 1 |   |   |
| C[C@@H](C)C                                      | 0 | 0 |   |
| COc1c(O[C@H]2C=CC2)C                             | 0 | 0 |   |
| N[C@@H]([C@H](OCc1ccc2ccccc12)C)C                | 0 |   |   |
| COc1cc(\C=C)C                                    | 1 | 0 | 1 |
| CCCCCCCCC                                        | 0 | 0 | 0 |
| CC(=CCCC(C)(OC(=O)c1ccccc1)C=C)C                 |   |   | 1 |
| Nc1cc(Cl)c(N=C2NCCN2)c1                          | 0 |   |   |
| CC1(CO1)C=C                                      | 0 |   |   |
| Cn1c(N)nc2ccc3ccccc3cc12                         | 1 |   |   |
| Nc1nc(cs1)c2cc(cs2)[N+](=O)[O-]                  | 1 |   |   |
| N[C@H](CCC)C                                     | 0 | 0 |   |
| CCCCCCCCCCC[N+](C)(C)Cc1ccccc1                   |   |   | 1 |
| Cc1ccc2nsc(NC(=O)C(Cl)(Cl)Cl)c2c1                | 1 |   |   |
| CC(=O)N(O)c1ccc(Br)cc1                           | 0 |   |   |
| Nc1nc(N)c(nc1)C                                  | 1 | 0 |   |
| O=N(=O)c1cccc2c3cccc4cccc(c12)c34                | 1 |   |   |
| CCc1nc2c(ccc3ccc4ccc(O)cc4c23)[nH]1              | 1 |   |   |
| [O-][N+](=O)c1cccc2oc3ccccc3c12                  | 1 |   |   |
| [O-][N+](=O)c1ccc2c(ccc3ccc(cc23)[N+](=O)C)C     | 1 |   |   |
| CC1=NCCc2c1[nH]c3cc(O)c1                         | 0 | 0 |   |
| CCCC[C@@H](CC)COC(=O)c1ccc(C(=O)C)cc1            | 0 |   |   |
| FC(F)(F)c1ccc(F)cc1                              | 0 | 0 | 0 |
| O=C1CCCCCO1                                      | 0 |   | 0 |
| Fc1c(F)c(F)c(Cl)c(F)c1F                          | 0 |   |   |
| O=N(=O)c1ccc(C=Cc2cccc(c2)C#N)cc1                | 1 |   |   |
| CCOC(=O)C[n+](c1ccc2ccccc12)C                    | 0 |   |   |
| C[C@@H]1[C@H](O)CCC2=CC(=O)[C@H](O)C1            | 1 |   |   |
| c1ccc(cc1)c2nc(c3ccccc3)c([nH]2)c4ccccc4         | 1 |   |   |
| CC(C)[N+](C)C                                    | 0 | 0 | 0 |
| CC(=O)OC1CCC2(C)C3CCC4                           | 0 |   |   |
| Nc1ccc2cc(ccc2c1)S(=O)(=O)O                      |   |   | 0 |
| O=C1C=C(Oc2c1ccc3ccccc3)C                        | 0 |   |   |
| CCCCCNc1snc2ccccc12                              | 0 |   |   |

|                                          |   |   |   |   |
|------------------------------------------|---|---|---|---|
| CC\C=C\CCO                               |   |   |   | 0 |
| CCCCNC(=N)I                              | 0 | 0 |   | 0 |
| ClC(Br)C#N                               |   |   | 1 |   |
| CCC(C)[C@@                               | 0 | 0 |   |   |
| CN(C)CCCNc1c2cccc2nc3c(cccc13)N(=C       |   |   | 1 |   |
| CC(C)(C)c1cc(CO)cc(c1O)C(C)(C)C          |   |   |   | 1 |
| CC(=O)[C@@H]1[C@@H]:                     |   | 0 |   |   |
| BrCC(=O)NCc1cccc1                        |   |   | 1 |   |
| OC[C@@H](O)[C@@H](O)[C@H](O)[C@          |   |   | 0 | 0 |
| CCN1C(=O)C-                              | 0 | 0 |   |   |
| C(Cc1cccc1)c2cccc2                       |   |   |   | 0 |
| CCC(=O)N1C(                              | 0 | 0 |   |   |
| OC1C=Cc2cc3ccc(cc3cc2C1O)[N+](=O)[C      |   |   | 1 |   |
| O=N(=O)c1cccc1N(=O)=O                    |   |   | 1 | 1 |
| Cc1cccc1N=                               | 0 | 0 | 1 | 0 |
| CCCCCCCC\C=C/CCCCCCCCOCCO                |   |   |   | 1 |
| CCCCCCCCCCCCCCCC(=O)O[C@@H]1[C@@H](O)[C@ |   |   |   | 0 |
| CCCCC(C)OC(=O)COc1ccc(Cl)c2ccnc12        |   |   |   | 0 |
| NC(=O)n1c(C                              | 0 | 0 |   | 1 |
| CCN(CC)CCNC(=O)c1cc(ccc                  |   | 0 |   |   |
| O=C(Nc1ccc(cc1)N(=O)=O)c2csc(c2)N(=      |   |   | 1 |   |
| CCCCCCCCCl                               |   |   |   | 0 |
| Oc1c(Br)cc(Br)cc1C(=O)Nc                 |   | 0 | 0 | 1 |
| CN1N(C(=O)C(=C1C)N=O)c2cccc2             |   |   | 1 |   |
| COc1cccc2C(=O)c3cccc3C(=O)c12            |   |   | 1 |   |
| COc1ccc(C(=O)c2ccc(C)cc2                 |   | 0 |   | 0 |
| NCCCCCN[S+](=O)([O-])c                   |   | 0 |   |   |
| CN1CCc2cc3OCOc3c4c5cccc5C(O)C1c24        |   |   | 1 |   |
| Oc1cc(ccc1N(=O)=O)N(=O)=O                |   |   | 1 |   |
| COc1cc2c(CC                              | 0 | 0 | 0 |   |
| N[C@@H]([C@H])(Cc1cccc                   |   | 0 |   |   |
| Nc1ncnc2c1nc(Br)n2C3OC                   |   | 0 |   |   |
| COc1cccc1[N+](=O)[O-]                    |   |   | 1 |   |
| Oc1cc(C=C(C;                             | 0 |   |   |   |
| COC1=C(OC)(                              | 0 | 0 |   |   |
| c1ccc2c(c1)cc3ccc4cc5cccc5c6ccc2c3c4     |   |   | 1 |   |
| CCS(=O)(=O)CCSP(=O)(OC)OC                |   |   |   | 0 |
| OC\C=C(\Cl)/C(=O)O)\C(Cl)Cl              |   |   | 1 |   |
| Clc1ccc(Cl)c(Cl)c1                       |   |   | 0 | 0 |
| CCCN(CCC)C1Cc2cc(OC)c(C                  |   | 0 |   |   |
| Fc1ccc(cc1N(=O)=O)N=[N+]=[N-]            |   |   | 1 |   |
| CC(C)OC(=O)C(=C)C                        |   |   | 0 |   |
| CCCCC1CCC(O)CC1                          |   |   |   | 0 |



|                                            |   |   |   |
|--------------------------------------------|---|---|---|
| Cc1c2ccccc2cc3ccccc13                      | 1 |   |   |
| Nc1ccc2[nH]c3ccccc3c2c1                    | 1 |   |   |
| CS(=O)(=O)N1C2C1c3ccccc3c4ccccc24          | 1 |   |   |
| CCCN1C(=O)Nc2nc([nH]c2                     | 0 |   |   |
| O=N(=O)c1cnc2c(c1)nc3cccn23                | 1 |   |   |
| CC(CN(C)C)CN1c2ccccc2S(=O)(=O)c3ccccc13    |   |   | 0 |
| OC[C@H]1O                                  | 0 | 0 |   |
| Cc1cccn2c1nc3c(C)c(cnc23)[N+](=O)[O-       | 1 |   |   |
| OCC1OC(C(O)C(O)C1O)c2ccc3C(=O)c4cc         | 1 |   |   |
| c1ccc2c(c1)c3ccccc3c4cc5cnccc5cc24         | 1 |   |   |
| CNC(=S)NC                                  |   |   | 0 |
| COc1ccc(cc1)                               | 0 | 0 |   |
| COC(=O)c1ccccc1C(=O)OC                     | 0 |   | 0 |
| Cc1c2ccccc2c([C@@H]3CO3)c4ccccc14          | 1 |   |   |
| CC(C)C1=C(C)                               | 0 | 0 | 0 |
| COc1cc(O)ccc1Nc2c3ccccc3nc4ccccc24         | 1 |   |   |
| CC(CNC(=O)c                                | 0 | 0 | 0 |
| CC1(C)CC(N)CC(C)(CN)C1                     | 0 |   | 0 |
| Cc1cc(C)c(N=Nc2cc(c3ccccc3c2O)S(=O)(       | 0 |   |   |
| COc1ccc(cc1                                | 0 | 0 | 0 |
| N[S+](=O)([O-])c1ccc(NC(                   | 0 |   |   |
| Cc1cc2ccccc2c3cc4C(O)C(O)C=Cc4cc13         | 1 |   |   |
| CCc1ccccc1N=C(O)c2csc(c2)N(=O)=O           | 1 |   |   |
| C[C@H]1CCCC(=O)CCC\C=C/c2cc(O)cc(C         | 0 |   |   |
| CN(C)c1ccc(cc1)C2CC3(C)C(CCC3(O)\C=(       | 0 |   |   |
| CN1CCN(CCC                                 | 1 |   |   |
| NC(CO)C(=O)O                               | 0 |   |   |
| N[C@@H](COC(=O)C=[N+]=[N-])C(=O)O          |   |   | 0 |
| CN1CC[C@@]2(Cc3nc4ccc                      | 1 |   |   |
| Cc1cc2c3ccccc3cc4ccc5cccc1c5c24            | 1 |   |   |
| Cc1cc(c(C)c2c3cc(O)ccc3[nH]c12)[N+](=      | 1 |   |   |
| COCCNC(=O)COc1ccc(OCC                      | 0 |   |   |
| [O-][N+](=O)C1CCCC1                        | 1 |   |   |
| Clc1cccc(Nc2nnc(c3ccccc3                   | 0 |   |   |
| COc1c2OC(=                                 | 0 | 0 | 0 |
| CCCCOC(=O)COC(=O)c1ccccc1C(=O)OCCCC        |   |   | 0 |
| CCCc1nc(C)c2C(=O)N=C(N                     | 0 |   |   |
| NC(=O)Nc1ccc(Cl)cc1                        |   |   | 0 |
| CN(C)C(=O)C(Cl)C(=O)C                      |   |   | 0 |
| CCCN1C(=O)I                                | 1 |   |   |
| CNC(=O)NC(                                 | 0 | 0 |   |
| CCCCOCCCC                                  | 0 |   | 0 |
| COc1ccc2c(cccc2c1C(F)(F)F)C(=S)N(C)CC(=O)O |   |   | 0 |

|                                               |   |   |   |
|-----------------------------------------------|---|---|---|
| Oc1c(l)cc(c2cccnc12)[S+](:                    | 0 |   |   |
| O=C1C(=C1c2                                   | 0 | 0 | 1 |
| CSC(C)(C)\C=N/O                               |   | 0 | 0 |
| OCC1OC(C(O)C1O)n2cnc3c2ncn4ccnc34             |   | 0 |   |
| C[C@H](CCO)CCCC(=C)C                          |   |   | 0 |
| ClCc1ccncc1                                   |   | 0 |   |
| OC1C(O)c2ccc(c3c4ccccc4c5cccc1c5c23)          |   | 1 |   |
| OS(=O)(=O)c1ccc(cc1)N2N=C(CC2=O)C(=O)[O-]     |   |   | 0 |
| C[C@H](NCCc1ccc(O)cc1)[C@H](O)c2ccc(O)cc2     |   |   | 0 |
| COC(=O)C(C)N(C(=O)c1occc1)c2c(C)cccc2C        |   |   | 0 |
| C(Oc1ccccc1C2CC2)C3=NC                        |   | 0 | 0 |
| COc1ccc2[nH]c(nc2c1)[S+]                      |   | 0 |   |
| NC(=O)\C(=C\c1ccc(O)c(O                       |   | 0 |   |
| O=N(=O)c1cc2cccc3c4ccccc4c(c1N(=O)=           |   | 1 |   |
| O=Nc1ccc(Oc2ccccc2)cc1                        |   | 1 |   |
| Cc1cc2c(cc1C                                  | 0 | 0 | 1 |
| CC1CN(CC(C)N1C(=O)c2ccccc2)N=O                |   | 0 |   |
| Cc1cc(Cn2cnc3CN([C@@H                         |   | 0 |   |
| O=Nc1ccc2ccc3c4CCCCc4cc5ccc1c2c35             |   | 1 |   |
| COc1ccc2c(cc3N(C)C(=O)C(=O)c4cc5OC(           |   | 1 |   |
| CC=Cc1ccc2OCOC2c1                             |   |   | 0 |
| CN1C2CCC1C                                    | 1 | 1 |   |
| [O-]Cl                                        | 0 | 0 | 0 |
| CC(=O)N(O)c1ccccc1C                           |   |   | 1 |
| [O-][S+](=O)(N1CCCNCC1)                       |   | 1 |   |
| CC(=CCC\C(=C\C\C\C(=C\C                       |   | 0 | 0 |
| CSCC[C@H](NC(=O)[C@H](Cc1ccc(OS(=O)(=O)O)cc1) |   |   | 0 |
| COC(OC)C=C(C)CCC=C(C)C                        |   |   | 0 |
| CC(=O)N[C@H]([C@@H](O)CC(=O)C(=O)O)[C@@H](    |   |   | 0 |
| Clc1cc2NC(=O)Cc2cc1CCN3CCN(CC3)c4nsc5ccccc45  |   |   | 0 |
| ON=C1CCCCC1                                   |   | 1 | 0 |
| COC(=O)[C@]12CCC(C)(C)C[C@H]1[C@H]3C(=O)C=C4  |   |   | 1 |
| Cc1c(C)c2OC                                   | 0 |   | 1 |
| NC1=NC(=O)c2c(CCc3ccc(cc3)C(=O)N[C@@H](CCC(=  |   |   | 0 |
| Cc1ccc(N)cc1N=Nc2cc(N)ccc2C                   |   | 1 |   |
| [O-]S(=O)(=O)c1cccc2ccccc12                   |   |   | 0 |
| C\C=C\C=C\C                                   | 0 | 0 | 0 |
| CC(C(=O)O)c:                                  | 0 | 0 | 0 |
| CC(=O)OC1CCC2(C)C3CCC4                        |   | 1 |   |
| [O-]C(=O)C1=C(C[n+])2cccc                     |   | 0 |   |
| CCCCC1CCCCC(=O)O1                             |   |   | 0 |
| Oc1ccc(O)c(c1)S(=O)(=O)[O-]                   |   |   | 0 |
| CN1Cc2ccccc2[C@H]3[C@                         |   | 0 |   |

|                                                |   |   |   |   |
|------------------------------------------------|---|---|---|---|
| CCCCCCCCCCCCCO                                 |   |   |   | 0 |
| C1CCC(CC1)N=C=NC2CCCCC2                        |   |   | 0 | 1 |
| OCC(O)C(O)C                                    | 0 | 0 |   |   |
| CCCCCCCCCCCCC(=O)ON(C(=O)C)c1ccc:              |   |   | 1 |   |
| [O-][N+](=O)c1ccc(C=NN2N=Nc3c([nH]             |   |   | 1 |   |
| Cc1ccc(NN=NCc2ccc(cc2)N(=O)=O)cc1              |   |   | 1 |   |
| CCC(=O)OCCOc1ccccc1                            |   |   |   | 0 |
| OCCNC(=O)N(CCCl)N=O                            |   |   | 1 |   |
| CC(=O)OCC=C                                    |   |   | 1 |   |
| CCC(=O)OCc1ccccc1[N+](=O)[O-]                  |   |   | 0 |   |
| Fc1ccc(cc1)C                                   | 0 | 0 |   | 0 |
| OC(CN=[N+]=[N-])CN=[N+]=[N-]                   |   |   | 1 |   |
| CCC[C@@H](C)C1(CC=C)C(=O)NC(=O)NC1=O           |   |   |   | 0 |
| Oc1ccc(Cn2c:                                   | 0 | 0 |   |   |
| CC(=CC1C(C=:                                   | 0 | 0 |   |   |
| Nc1cc(Cl)cc(Cl)c1                              |   |   | 0 | 0 |
| Cc1ccccc(C)c1                                  | 0 | 0 |   |   |
| FC(F)(F)C(F)(F)C(F)(F)C(F)(F)C(F)(F)C(F)(F)CCI |   |   |   | 0 |
| CC(C)(C)NC(=O)C=C                              |   |   |   | 0 |
| CN(CC(=O)COC(=O)C)N=O                          |   |   | 1 |   |
| NC1=NC(=O)N(CC(O)CN=N#N)C=C1                   |   |   | 1 |   |
| CCCCCCCCCCCCCCCCC(=O)OCC(CC)CCCC               |   |   |   | 0 |
| CC[C@H]1OC(=O)[C@H](C)[C@@H](O[C@H]2C[C@C      |   |   |   | 0 |
| CC(C)[C@@]12CC[C@@](C)(O1)[C@H](C2)OCc3ccccc   |   |   |   | 0 |
| CCCCCOC(=O)CCCCC                               |   |   |   | 0 |
| CCCCN(N=O)C(=O)N                               |   |   | 1 |   |
| CCN(CC)CCCC                                    | 1 | 1 | 1 |   |
| CCCCCCCCC(C                                    | 0 | 0 |   | 0 |
| O\N=C\C(=O)Nc1ccccc1                           |   |   | 0 |   |
| N[C@@H](CCC(=O)N[C@                            |   | 0 |   | 0 |
| CC[C@]1(O)C                                    | 0 |   |   |   |
| NC[C@@H]1O[C@H](O[C@H]2[C@@H](O)[C@H](O        |   |   |   | 0 |
| NC(=N)NC(=I                                    | 0 | 0 |   | 0 |
| CC12CCC3C(C                                    | 0 | 1 |   |   |
| CC(C)CC(=O)O                                   |   |   |   | 0 |
| CC(=O)[C@H                                     | 0 |   |   |   |
| CC(=O)NC1[C                                    | 0 | 0 |   |   |
| Cc1ccc(cc1N)C(=O)N                             |   |   |   | 0 |
| Nc1cccc2ccccc12                                |   |   | 1 | 0 |
| CCCOC(=O)c1                                    | 0 | 0 |   | 0 |
| COc1ccc(cc1)C(=O)c2c(C)n                       |   | 0 |   |   |
| COC(=O)c1cc2OCOc2c3c4ccccc(OC)c4cc(            |   |   | 1 |   |
| NCC#Cc1cccc                                    | 0 |   |   |   |

|                                                                 |   |   |   |
|-----------------------------------------------------------------|---|---|---|
| <chem>COc1ccc(COC=O)cc1</chem>                                  |   |   | 0 |
| <chem>CN1C(C(=O)N</chem>                                        | 0 |   |   |
| <chem>OC1COC2C(COC12)ON(=O)=O</chem>                            |   | 0 |   |
| <chem>CN1CCC[C@@H]1Cc2c[nH]</chem>                              | 1 |   |   |
| <chem>OC1C(Oc2c3ccccc3c4ccc5cccc6ccc2c4c5</chem>                |   | 0 |   |
| <chem>CC1C(C)(C)C2=C(C(=O)CCC2)C1(C)C</chem>                    |   | 0 | 0 |
| <chem>CCCCN(CC(O)c1ccc(O)cc1)N=O</chem>                         |   | 0 |   |
| <chem>CC(=O)NC1SCCC1=O</chem>                                   | 0 |   |   |
| <chem>Nc1ccc(Cc2ccc(N=O)c(Cl)c2)cc1Cl</chem>                    |   | 0 |   |
| <chem>NP(=O)(N)N(</chem>                                        | 0 | 0 | 0 |
| <chem>C(CCOC[C@H]1CO1)COC[C@H]2CO2</chem>                       |   | 1 |   |
| <chem>Nc1ncnc2c1r</chem>                                        | 0 | 0 |   |
| <chem>COc1cc2C=CC(=O)Oc2cc1C</chem>                             |   | 0 |   |
| <chem>Nc1cc(N)c(cc1N=Nc2ccc(cc2)S(=O)(=O)</chem>                |   | 1 |   |
| <chem>CC1Nc2cc(Cl)c(cc2C(=O)N:</chem>                           |   | 0 |   |
| <chem>CCOc1ccccc1N(=O)=O</chem>                                 |   | 1 |   |
| <chem>O=N(=O)c1ccc2c(c1)c3cc4ccccc4c5cccc2</chem>               |   | 1 |   |
| <chem>Nc1ccc(cc1)C</chem>                                       | 0 | 0 | 0 |
| <chem>COC(=O)\C(=C\c1oc(Br)cc1)\[N+](=O)[C</chem>               |   | 0 |   |
| <chem>CC1=CN(C2CC(N=N#N)C(CO)O2)C(=O)N</chem>                   |   | 1 |   |
| <chem>CC(Cc1ccccc1)NC(=O)N[S+</chem>                            |   | 0 |   |
| <chem>CC(C)CC1NC(=O)C(C)N(C)C(=O)CNC(=O)</chem>                 |   | 0 |   |
| <chem>CCN(CC)c1ccccc1</chem>                                    |   | 0 | 0 |
| <chem>Nc1ccc2sncc2c1</chem>                                     |   | 1 |   |
| <chem>CC(=CC(=O)C=C(C)C)C</chem>                                |   |   | 0 |
| <chem>C[C@](Cc1ccc(O)c(O)c1)(N</chem>                           | 0 |   |   |
| <chem>Cc1ccc2ccc3ccc(C)cc3c2c1</chem>                           |   | 1 |   |
| <chem>Nn1nnc2c3ccccc3nc2c1O</chem>                              |   | 1 |   |
| <chem>OC(=O)c1cccc(n1)C(=O)O</chem>                             |   |   | 0 |
| <chem>O=N(=O)c1ccc2c3cc4ccccc4cc3c5cccc1c</chem>                |   | 1 |   |
| <chem>CC(C)(c1cc(Br)c(OCCO)c(Br)c1)c2cc(Br)c(OCCO)c(Br)c</chem> |   |   | 1 |
| <chem>CCCCCOC(=O)C(C)CC</chem>                                  |   |   | 0 |
| <chem>CC1=C(CCC(=O)[O-])c2cc3[</chem>                           |   | 0 |   |
| <chem>CCCCC(C)O</chem>                                          |   |   | 0 |
| <chem>CCC(=O)C=C</chem>                                         |   | 1 |   |
| <chem>O=S1(=O)CCCC1</chem>                                      |   | 0 | 0 |
| <chem>CC(C)[N+]1(C</chem>                                       | 0 | 0 |   |
| <chem>O=N(=O)c1oc(C=Nn2cccn2)cc1</chem>                         |   | 1 |   |
| <chem>S=C=Nc1ccccc1</chem>                                      |   |   | 1 |
| <chem>CCC(O)OCCCO</chem>                                        |   |   | 0 |
| <chem>COc1c(Cl)ccc2Oc3cc4OC5OC=CC5c4c(O</chem>                  |   | 1 |   |
| <chem>CCCOP(=S)(OCCC)OP(=S)(OCCC)OCCC</chem>                    |   | 0 |   |
| <chem>CCCCN(CC(=O)CC)N=O</chem>                                 |   | 1 |   |

|                                             |   |   |   |   |
|---------------------------------------------|---|---|---|---|
| CC(OC(=O)C)OC(=O)C                          |   |   | 0 |   |
| CC(=O)c1cc(cc2c1CCC2(C)C)C(C)(C)C           | 0 |   | 1 |   |
| Oc1ccc(cc1)C                                | 0 | 0 |   |   |
| Cc1cnc2c(C)c(C)c3c(nc(N)n3C)c2n1            |   |   | 1 |   |
| C[C@](N)(CCP(=O)(O)O)C                      |   | 0 |   |   |
| Cc1cc2ncccc2c3nc(N)n(C)c13                  |   |   | 1 |   |
| Oc1nnc(O)c2cc(ccc12)N(=O)=O                 |   |   | 1 |   |
| Oc1[nH]cnc2nccc12                           |   |   | 0 |   |
| CN1c2cccc2C(=O)c3c(O)cc4OC(Cc4c13)          |   |   | 1 |   |
| Sc1c(Cl)c(Cl)c(Cl)c(Cl)c1Cl                 |   |   | 0 |   |
| COP(=O)(OC)O\C(=C/Br)\c1ccc(Cl)cc1Cl        |   |   | 0 |   |
| CC(C)C1(NC(=O)C2CC3C(Cc4c[nH]c5cccc         |   |   | 0 |   |
| O=C1CCc2c3CCCc3c4c(ccc5cccc45)c12           |   |   | 0 |   |
| CN[C@H]1[C                                  | 0 | 0 |   | 0 |
| CC(Cc1ccc(O)                                | 0 | 0 |   | 0 |
| CC(=CCC\C(=C/CC\C(=C/CC\C=C(\C)/CC\         |   |   | 0 |   |
| OC1C(O)c2c(Br)c3cccc3cc2c4cccc14            |   |   | 0 |   |
| C1C[C@@H]                                   | 0 | 0 |   |   |
| CN(C)C                                      |   |   | 0 | 0 |
| [O-][N+](=O)c1cccc2cccc12                   |   |   | 1 |   |
| OCCCC1CCCCC1                                |   |   |   | 0 |
| CC(N)COc1c(                                 | 0 | 0 |   | 0 |
| [O-][N+](=O)c1cccc1COC(=O)c2cccc2           |   |   | 0 |   |
| CC(=O)OC1C(                                 | 0 | 0 |   |   |
| CCCCCCCCCCCCc1cccc1O                        |   |   |   | 1 |
| OC(=O)c1ccc(\C=C\c2oc(cc2)[N+](=O)[C        |   |   | 1 |   |
| [N-]=[N+]=C1C=NC(=O)NC1=O                   |   |   | 1 |   |
| CCOC(=N)CC(=O)OCC                           |   |   |   | 0 |
| CCN1C=C(C(=                                 | 0 | 0 | 1 | 0 |
| COc1cnc(NS(                                 | 0 |   |   | 0 |
| CC(C)c1nc(nc                                | 1 |   |   |   |
| COc1cc(ccc1N=C=O)c2ccc(N=C=O)c(OC)          |   |   | 1 | 0 |
| CN1C(=NC(=O)C(C)(C2=CCCC2)C1=O)O            |   |   |   | 0 |
| Cc1cccc2nc3c(ccc4cccc34)cc12                |   |   | 1 |   |
| O=C1c2cccc                                  | 0 | 0 | 1 | 1 |
| OCc1ccc2cccc3c4cccc4c1c23                   |   |   | 0 |   |
| Cc1ccc2[nH]c3c(C)ccc(C)c3c2c1               |   |   | 1 |   |
| COc1ccc(cc1OC)[C@@H]2CC(=O)c3c(O)cc(O[C@@H] |   |   |   | 0 |
| CC(CN(C)C)CN1c2cccc2CC                      |   | 1 |   |   |
| Cc1cccc2cc(ccc12)[N+](=O)[O-]               |   |   | 1 |   |
| CCCCCCCCC(                                  | 0 | 0 |   | 0 |
| C=CCN1CCN(CC1)c2nc3ccc                      |   | 0 |   |   |
| COCCOCCOCCO                                 |   |   |   | 0 |

|                                       |   |   |     |
|---------------------------------------|---|---|-----|
| CC(=CCCC(=O)C)C                       |   |   | 0   |
| C(COc1ccc2OCOc2c1)CN3C                | 1 |   |     |
| O1C2C1c3c(ccc4cccc34)c5cccc25         |   | 1 |     |
| CC(=O)Nc1ccc2c3cc(O)ccc3c4cccc1c24    |   | 1 |     |
| CC(C)(C)NCC(                          | 0 |   |     |
| CC(=C[C@H]1[C@H](C(=O)OCc2oc(CC#C     |   | 1 |     |
| COc1ccc2cccc(N3CCN(CCN                |   | 1 |     |
| CNCCNS(=O)                            | 0 |   |     |
| CC(C)C[C@@                            | 0 | 0 | 0   |
| CC(=O)OCc1cccc(c1)[N+](=O)[O-]        |   | 0 |     |
| CC(=O)O[C@                            | 0 | 1 |     |
| CNc1ccc2ncccc2c1N                     |   | 0 |     |
| Oc1c(cc(cc1[N+](=O)[O-])C(F)(F)F)[N+] |   | 0 |     |
| OCc1ccc(cc1)C(F)(F)F                  |   | 0 |     |
| C[C@]12CC[C@H](O)C[C@                 |   | 1 |     |
| CC1=NN(C(=O)C1)c2ccc(cc2)C(=O)O       |   |   | 0   |
| O=C(OC[C@H]1CO1)c2cccc(c2)C(=O)OC     |   | 1 |     |
| ICI                                   |   | 0 |     |
| Nc1c2cccc2nc3ccc(l)cc13               |   | 1 |     |
| Clc1nc2cccc2nc1Cl                     |   | 0 |     |
| CN1CCCC1c2cccnc2                      |   | 0 |     |
| CCCCCCC(O)CC=CCCCCCCC(=O)O            |   | 0 |     |
| CC(=O)CN(CC(=O)C)N=O                  |   | 1 | 0   |
| [O-][N+](=O)c1ccc(cc1)C(=O)[C@H]2O[   |   | 1 |     |
| ClCc1cc2cc3cccc3c4ccc5cccc1c5c24      |   | 1 |     |
| ClCCN(CCCl)c1ccc2oc(cc2c1)N(=O)=O     |   | 1 |     |
| Cc1cc(C)c(O)c(C)c1                    |   |   | 0   |
| CC(C)c1ccc2c                          | 0 | 0 |     |
| Cc1cc2c(nc(N)n2C)c3ncc(nc13)c4cccc4   |   | 1 |     |
| [O-][N+](=O)c1ccc2ncccc2c1            |   | 1 |     |
| CCCC(=O)Nc1snc2ccc(Cl)cc12            |   | 0 |     |
| O=C(C1OC1c2cccc2)c3cccc3              |   | 1 |     |
| Nc1ccc2cc3cccc3nc2c1                  |   | 1 |     |
| [O-][N+](=O)c1cccc2cccnc12            |   | 1 |     |
| CCCCCOC(=O)C=C                        |   | 0 | 0   |
| CC[C@@H]1                             | 0 | 0 |     |
| c1ccc(nc1)c2                          | 0 | 0 | 1 0 |
| Oc1ccc(O)c2cccc12                     |   | 1 |     |
| N=C1CCCCN1                            |   |   | 0   |
| Cc1cncc(C=C                           | 0 | 0 |     |
| CCN[C@@H]                             | 0 | 0 |     |
| N#CC1(CCCCC1)N=NC2(CCCCC2)C#N         |   |   | 0   |
| CC(C)(Cl)Cl                           |   | 0 | 0   |

|                                             |   |   |   |
|---------------------------------------------|---|---|---|
| CN[C@@H]1[C@@H](O)[C@@H](O[C@H]2[C@H](N     |   |   | 0 |
| COc1ccc(CC=C)cc1                            |   | 0 | 0 |
| Oc1ccc2C(=O)c3ccccc3C(=O)c2c1               |   |   | 1 |
| CC[C@]1(O)C[C@@H](O)c2c(O)c3C(=O)           |   | 1 |   |
| [O-]c1ccc(cc1)N(=O)=O                       |   |   | 1 |
| NCCCCCNS(                                   | 1 |   |   |
| NCC1CCC(CC:                                 | 0 | 0 |   |
| Nc1ncc(s1)N(=O)=O                           |   |   | 1 |
| CC(=O)NC1[C                                 | 0 | 0 |   |
| O=N(=O)c1cccc(c1)C#N                        |   | 1 |   |
| CN(C)S(=O)(=                                | 0 |   |   |
| Nc1ccc(cc1C(=O)O)S(=O)(=O)O                 |   | 0 |   |
| O=NN1CCCC1c2cccn2                           |   | 1 |   |
| OC(c1ccc(Cl)cc1)(c2ccc(Cl)cc2)C(Cl)(Cl)C    |   | 0 | 1 |
| Oc1ccc(Cl)cc1C2CCCC2                        |   |   | 1 |
| CC[C@]1(O)C(=O)OCC2=C:                      |   | 0 |   |
| CCc1cc(cc(CC)c1N)c2ccccc2                   |   | 0 |   |
| CC(=O)OCC(=O)[C@@]1(O)[C@@H](C[C@H]2[C@@    |   |   | 0 |
| CC(CN(C)C)Cl                                | 1 | 1 |   |
| NC(Cc1cccc(c1)c2ccccc2CP                    |   | 0 |   |
| CC=[N+](O)[O-]                              |   | 0 |   |
| Cc1cn(NC(=O)c2cnc(nc2C)c3cccn3)c4ccc(F)cc14 |   |   | 0 |
| Oc1c([nH]c2ccccc12)C3=Nc4ccccc4C3=C         |   | 1 |   |
| Oc1cc2c(ccc3ccc4cccc1c4c23)[N+](=O)[        |   | 1 |   |
| CN(C)C(C)(C)CO                              |   |   | 0 |
| CCc1cccc(CC)c1NC(=O)CCl                     |   | 1 |   |
| CCc1c2ccccc2cc3ccc4ccccc4c13                |   | 0 |   |
| COc1ccc2c(c:                                | 1 |   | 0 |
| CC1(C)SC2C(NC(=O)COc3ccccc3)C(=O)N          |   | 0 |   |
| CC1=NN(C(=O                                 | 0 | 0 | 1 |
| [O-][N+](=O)c1ccc(OC[C@H]2CO2)cc1           |   | 1 |   |
| NCCS(=O)O                                   | 0 |   |   |
| CN(C)C1=C(C                                 | 0 | 0 | 1 |
| CCN(CC)c1ncnc2c1ncn2[C(                     |   | 0 |   |
| CC(=O)c1oc(c(Cl)c1Cl)N(=O)=O                |   | 1 |   |
| OC(=O)CNCC(=O)O                             |   |   | 0 |
| Nc1ccc(N)c(Cl)c1                            |   | 1 | 1 |
| N[S+](=O)([O-])c1cc2c(NC                    |   | 0 |   |
| CC(=O)OC1Cc2cc3cccc4ccc5ccc1c2c5c34         |   | 1 |   |
| COc1cccc(c1)C(=O)ON(OCc2ccccc2)C(=O         |   | 1 |   |
| CCC(=O)O[C@@H]1CC(=O)O[C@H](C)CC=CC=C[C@H]  |   |   | 0 |
| CCC1OC1c2ccccc2                             |   | 0 |   |
| BrCC(Br)COC(=O)C=C                          |   | 1 |   |

|                                             |   |   |   |
|---------------------------------------------|---|---|---|
| Oc1ccc(cc1)N(=O)=O                          | 0 | 1 |   |
| CCC1(Cc2ccccc2O1)c3ncc[i                    | 0 |   |   |
| Clc1ccc2Oc3c                                | 1 | 1 |   |
| COc1cc(CC(C)C)cc(OC)c1OC                    |   |   | 0 |
| CN(C)c1ccc(cc1)N=Nc2ccc(cc2)N(C)C           | 0 |   |   |
| NC(Cc1c[nH]c2ccccc12)C(=O)O                 | 0 |   | 0 |
| Cc1ccc2cc3c(ccc4ccccc34)c5C(O)Cc1c25        | 1 |   |   |
| COC(=O)[C@]12O[C@@]1(C)[C@@H](C             | 1 |   |   |
| CCCCCCC#N                                   |   |   | 0 |
| O=C1Oc2c3CCCN4CCc(cc2C=C1)c34               | 1 |   |   |
| C[C@]12CC[C@H]3C(=CCc4cc(O)ccc34)[C@@H]1CCC |   |   | 1 |
| BrC[C@@H](Br)[C@@H]1CC[C@@H](B              | 0 |   |   |
| [O-][N+](=O)c1ccc2c3cc4ccccc4cc3c5cc        | 1 |   |   |
| CCCCCCCNC                                   | 1 |   | 1 |
| OC(=O)C(Cc1                                 | 0 | 0 | 0 |
| C[C@@]12[C@H]3C[C@H](C=C3)[C@@H]1C(=O)OC2   |   |   | 0 |
| CCNc1cc(O)ccc1C                             | 1 |   |   |
| O=C1CCCCCCCCCCCCCO1                         | 0 |   | 0 |
| Oc1ccc2OCOc2c1                              | 0 |   | 0 |
| N[S+](=O)([O-])c1cc2c(NC                    | 0 |   |   |
| CC(=O)C1=C(C(=O)C(=C1)C(C)(C)C(C)(C         | 0 |   |   |
| CCc1cc(O)cc2c3CCOC(CC)(CC(=O)O)c3[n         | 1 |   |   |
| C1Cc2c(ccc3ccnc23)C4OC14                    | 0 |   |   |
| O=N(=O)C(N(=O)=O)(N(=O)=O)N(=O)=O           | 1 |   |   |
| ClCc1cnc(Cl)nc1Cl                           | 1 |   |   |
| CC(=Nc1ccc(cc1)N(=O)=O)O                    | 0 |   |   |
| CCN(C=O)N=O                                 | 1 |   |   |
| COc1ccc(Cc2nnc2C3(Cc                        | 0 |   |   |
| CCCC(=O)Nc1snc2ccccc12                      | 0 |   |   |
| NC1=NC(=S)NN1                               |   |   | 0 |
| CN(C)CCNC(=O)c1cccc2cc3ccccc3nc12           | 1 |   |   |
| COc1ccccc1C2=CC(=O)c3cc                     | 0 |   |   |
| C\C=C\C1=C(                                 | 0 | 0 |   |
| O=C1C(C(=O)c2ccccc12)c3ccc4ccccc4n3         | 1 |   | 1 |
| CCCCCOC(=O)c1ccc(O)cc1                      |   |   | 1 |
| CC(=O)NC(Cc                                 | 0 | 0 | 0 |
| CNC(=O)[C@H]1O[C@H]([                       | 0 |   |   |
| Nc1c(cc(c2cc                                | 0 | 0 | 0 |
| O=C=Nc1ccc(cc1)N=C=O                        | 0 |   |   |
| C1CCNCC1                                    |   |   | 0 |
| O=N(=O)c1cc2ccc3cc4ccccc4c5ccc(c1)c2        | 1 |   |   |
| Clc1ccncc1                                  | 0 |   |   |
| COc1c(c(C)c(cc1C(C)(C)C)N(=O)=O)N(=O)=O     |   |   | 1 |



|                                                |   |   |   |
|------------------------------------------------|---|---|---|
| ONc1ccc(Oc2ccccc2)cc1                          | 1 |   |   |
| CN1C[C@@H](c2ccccc2)c3cccc(N)c3C1              | 0 |   |   |
| CC(C)NCC(O)COc1ccc(CCO                         | 0 |   | 0 |
| COC(=O)CCCC(=O)OC                              | 0 |   | 0 |
| O=N(=O)c1ccc2ccc3c4ccccc4c(c5ccc1c2            | 1 |   |   |
| CS(=O)(=O)c:                                   | 0 |   |   |
| O=C1c2cccc3ccc4ccc5cccc1c5c4c23                | 0 |   |   |
| O1[C@@H]2C=CC=C[C@H]12                         | 1 |   |   |
| Oc1ccccc1S(=O)(=O)O                            |   |   | 0 |
| C1CN2CC(N=C2S1)c3ccccc:                        | 0 |   |   |
| NC(C(=O)N[C                                    | 0 | 0 |   |
| Cc1ccc(cc1)S(=O)(=O)OCc2ccccc2                 | 0 |   |   |
| N[C@@H](C                                      | 0 | 0 |   |
| Cn1cc(C2=C(C(=O)NC2=O)c3cn(C4CCN(Cc5ccccc5)CC4 |   |   | 0 |
| Cc1c(cccc1N=C=O)N=C=O                          | 1 |   | 0 |
| CC(CCc1ccc2OCOc2c1)NN                          |   |   | 0 |
| o1ccc2c1cc3ccc4cccc5ccc2c3c45                  | 1 |   |   |
| CCCCSCCCC                                      |   |   | 0 |
| CCOP(=S)(OCC)SCSC(C)(C)C                       | 0 |   |   |
| Nc1cc(ccc1C(=O)O)[N+](=O)[O-]                  | 1 |   |   |
| OC(=O)C1=C                                     | 0 | 0 | 0 |
| OC1C(O)c2cccc3ccc4cccc1c4c23                   | 0 |   |   |
| CC\C=C\C=C\C=C\C=C\C=C\C=C\OC                  | 1 |   |   |
| CN(C)CCc1cc:                                   | 0 | 0 | 0 |
| COc1cc(cc(OC)c1OC)[C@H                         | 1 |   |   |
| Nn1c2ccccc2c3cnccc13                           | 1 |   |   |
| O=C1C(C(=O)                                    | 0 | 0 | 0 |
| O=C1CN(CCCN2CC(=O)NC(=O)C2)CC(=O               | 0 |   |   |
| CC\C=C/C#N                                     | 0 |   |   |
| CN(COC(=O)C)N(=O)=O                            | 1 |   |   |
| O1[C@@H]2[C@H]1c3c4ccccc4cc5c6cc               | 1 |   |   |
| COc1cccc2C(=O)c3c(O)c4C[C@](O)(C[C(            | 1 |   |   |
| Nc1ccc2cc(c(N=Nc3ccc(cc3)c4ccc(cc4)N           | 1 |   |   |
| Cc1ccnc(NS(:                                   | 0 |   | 0 |
| CN1CCc2cccc                                    | 0 | 0 |   |
| CN1CC(c2ccccc2)c3cccc(N)                       | 1 |   | 0 |
| CC(=C)C(=O)OCCOP(=O)(O)O                       |   |   | 0 |
| C[C@@H]1C[C@H]2[C@@H]3CCC4=CC(=O)C=C[C@]4      | 1 |   |   |
| O=C1NC(=S)NC=C1                                |   |   | 0 |
| Nc1cc(c(N)cc1Cl)N(=O)=O                        | 1 |   |   |
| C=C[C@H]1CCC=CC1                               | 0 |   |   |
| CCC(Oc1ccccc:                                  | 0 | 0 |   |
| O=C(OCCCCCOC(=O)c1ccccc1)c2ccccc2              |   |   | 0 |

|                                               |   |   |
|-----------------------------------------------|---|---|
| COC(=O)c1occc1                                | 0 |   |
| CCNCC(O)c1cccc(O)c1                           |   | 0 |
| ClCC(=O)Nc1snc2ccc(Cl)cc12                    | 1 |   |
| OC(=O)CCc1c                                   | 0 | 0 |
| Clc1cccc(Cl)n1                                | 0 |   |
| COc1c(OCC2OC2(C)C)ccc3c(OC)c4ccoc4            | 0 |   |
| Nc1nc(N)c2nc(CC(CC#C)c3ccc(cc3)C(=O)N[C@@H](C |   | 0 |
| O=N(=O)c1oc2c(c1)cc3ccc4cccc5ccc2c3           | 1 |   |
| CCC(=O)[C@                                    | 0 | 0 |
| CC(N)Cc1ccc                                   | 0 | 0 |
| COCCCC\C(=N/OCCN)\c1c                         | 1 |   |
| FC(=C(F)Cl)F                                  | 0 |   |
| C1CCCNCC1                                     | 0 | 0 |
| COc1cc2OC3OC=CC3c2c4OC(=O)C5=C(C              | 1 |   |
| CC1CCCC(=O)CCCC=Cc2cc(O)cc(O)c2C(=            | 0 |   |
| ON(Cc1ccccc1)Cc2ccccc2                        |   | 0 |
| OC1C=Cc2c(Br)c3ccc4cccc4c3cc2C1O              | 0 |   |
| Oc1cccc(C2=CC(=O)c3cccc                       | 0 |   |
| OC1C(O)c2c3ccccc3cc4ccc5cccc1c5c24            | 1 |   |
| CC(C)c1ccc(NC(=O)N(C)C)cc1                    |   | 0 |
| OC1=NC(=O)N(C1)N=Cc2oc(cc2)N(=O)=             | 1 |   |
| OCC1OC(C(O                                    | 0 | 0 |
| OC1C=Cc2cc3ccccc3c(c2C1O)[N+](=O)[C           | 0 |   |
| [O-]S(=O)(=O)CCCS(=O)(=O)[O-]                 |   | 0 |
| CN1CCN(CC1)C2=Nc3cc(F)                        | 1 |   |
| NC(=N)N[C@                                    | 0 | 0 |
| CC(C)(C)NCC(O)CSc1nc(cs1)c2ccc(s2)C(=O)N      |   | 1 |
| CC(C)C[C@H]                                   | 0 | 0 |
| CCCNCCC                                       | 0 | 0 |
| Nc1ccc(Oc2ccc(cc2)[N+](=O)[O-])cc1            | 1 |   |
| CN1C(=O)C23CC4=CC=CC(O)C4N2C(=O)(             | 0 |   |
| COc1ccc2C(=O)C=C(Oc2c1                        | 0 |   |
| COc1cccc(OC                                   | 1 | 0 |
| NCCNCCNCCNCCN                                 | 1 |   |
| NC1=Nc2c(nc                                   | 0 | 0 |
| Cc1cc(Cl)ccc1O                                | 0 | 1 |
| C[S+](=O)([O-])c1ccc(Cn2c                     | 0 |   |
| Oc1cccc(c1)C2=CC(=O)c3c                       | 0 |   |
| CC(=O)C(=O)                                   | 0 | 0 |
| COc1ccc(O)c                                   | 0 | 0 |
| Cc1ccc2cc3c(ccc4ccccc34)c5[C@@H](O            | 1 |   |
| CSc1nc(N)c2                                   | 0 |   |
| CN1CCN(CC1)c2ccc3[nH]c(CCCCCc4ccc             | 0 |   |

|                                                  |   |   |   |
|--------------------------------------------------|---|---|---|
| CCCCOCCOC(=O)c1ccccc1C(=O)OCCOCCCC               |   |   | 0 |
| CN(C)[C@H]1[C@@H]2[C@@H](O)[C@@H]3C(=C)c4        |   |   | 0 |
| CCC(CC)(CC(=                                     | 0 | 0 | 1 |
| Nc1ccc(cc1)c2ccc(N)cc2                           |   |   | 1 |
| Clc1ccc(COC(                                     | 1 | 0 | 0 |
| Cc1nc2ccc(N)c(C)c2nc1C                           |   |   | 1 |
| CC(C)C(=O)\N=C\1/SN(C(=O)C(C)C)c2cc              |   |   | 1 |
| CC1(C)[C@@                                       | 0 | 0 |   |
| NC(=O)c1cn(                                      | 0 | 0 | 0 |
| Nc1ncnc2c1ncn2c3ccc(cc3)[N+](=O)[O-              |   |   | 1 |
| OC(=O)CCCc1ccc(cc1)N(CC                          |   | 0 | 1 |
| CCC1(C(=O)N                                      | 0 | 0 | 0 |
| COC(=O)\C=C\C=C(/C)\C=C\C=C(/C)\C=C/C=C(\C)/C=C( |   |   | 0 |
| CCCCCCC(O)CO                                     |   |   | 0 |
| COc1cc2nc(n                                      | 0 | 1 |   |
| CC1Nc2cc(Cl)                                     | 0 |   |   |
| OC(=O)c1c[n+](([O-])c2ccccc2[n+]1[O-]            |   |   | 1 |
| CC(C)n1c\C=C\C[C@@H](O)C[C@@H](O)CC(=O)O)c(c     |   |   | 0 |
| COc1ccccc1C                                      | 0 | 0 |   |
| CC\C=C\C\CC\C=C\C=O                              |   |   | 0 |
| C[C@]12CCC:                                      | 0 | 0 |   |
| C[C@@H](N                                        | 1 | 0 |   |
| O=C([C@@H]1CO1)c2ccc3OCOc3c2                     |   |   | 1 |
| CCCCCCCCCCCCCCCCC                                |   |   | 0 |
| CNC(=S)[S-]                                      |   |   | 0 |
| CCCCCCC(C)(C)C(=O)OC[C@@H]1CO1                   |   |   | 1 |
| Cc1c2C3OC3c4ccccc4c2nc5ccc(CO)cc15               |   |   | 0 |
| CC1(C)CCC[C@@]2(C)[C@@H]3CC[C@@H]([C@H]13        |   |   | 0 |
| OC(=O)CP(=C                                      | 0 | 0 | 0 |
| CC(C)c1ccc(cc1)S(=O)(=O)[O-]                     |   |   | 0 |
| C[n+]1ccccc1\C=N\O                               |   |   | 0 |
| Oc1ccc2ccc3c(ccc4ccc1c2c34)[N+](=O)[             |   |   | 1 |
| CCOC(=O)Nc1cccc(OC(=O)Nc2ccccc2)c1               |   |   | 1 |
| COc1cc(ccc1                                      | 0 | 0 |   |
| Cc1ccccc(O)c1C                                   |   |   | 0 |
| OC1CCCC1                                         |   |   | 0 |
| CCCCCCC(C\C=C\CCCCCCCC(=O)OC)OC(=                |   |   | 0 |
| CC(=O)Nc1ccc(cc1)S(=O)(=O)N                      |   |   | 0 |
| COc1ccc2C3OC3C4CCCCC4c2c1                        |   |   | 0 |
| ClC(=C(Cl)SSc1ccccc1N(=O)=O)Cl                   |   |   | 1 |
| CCCCC(CC)COCCC#N                                 |   |   | 0 |
| CC1c2ccccc2c3ccccc13                             |   |   | 1 |
| OC(=O)COc1ccc(Cl)cc1Cl                           |   |   | 0 |

|                                                  |   |   |   |   |
|--------------------------------------------------|---|---|---|---|
| OC(=O)[C@                                        | 0 | 0 |   |   |
| CS(=O)(=O)c:                                     | 0 |   |   | 0 |
| CCOC(=O)C(Cc1ccccc1)N(                           |   | 1 |   |   |
| C\C=C/C=O                                        |   |   | 1 |   |
| BrC1CCN(CC1Br)N=O                                |   |   | 1 |   |
| O=C1NC(=O)C=C1                                   |   |   | 1 |   |
| CCCCCCC                                          |   |   |   | 0 |
| CCN1C2=CC(=N)C=CC2=C3C=CC(=CC3=C:                |   | 1 |   |   |
| ClCCOCCOCCCl                                     |   |   |   | 0 |
| Nc1[nH]c(nc2ncnc12)c3ccc(cc3)[N+](=C             |   | 1 |   |   |
| COc1ccc(cc1)S(=O)(=O)N2N=CC(=C(Cl)C              |   | 0 |   |   |
| C[C@@]12CCC[C@H]1[C@@H]3CC[C@H]4C[C@@H]          |   |   |   | 0 |
| [O-][N+](=O)c1ccc2c(Cc3cc4CCCCc4cc2              |   | 1 |   |   |
| Cc1ccc2cc3c4ccccc4C(O)C(O)c3c5CCc1c:             |   | 1 |   |   |
| CN(C)[C@H]1[C@@H]2[C@H]3C(=C(O)[C@]2(O)C(=       |   |   |   | 0 |
| O=C1CN(\N=C\c2oc(cc2)c3ccc(cc3)N(=O)=O)C(=O)[N   |   |   |   | 1 |
| COc(=O)N(C(=O)N1CO[C@]2(Cc3cc(Cl)ccc3C2=N1)C(    |   |   |   | 1 |
| C[C@@H](CCO)C(=O)O[C@                            |   | 0 |   |   |
| Cc1onc(c2ccc                                     | 0 | 0 |   |   |
| CC(C)(C)c1ccc(OP(=O)(Oc2ccccc2)Oc3cc             |   | 0 |   |   |
| CCNc1ccc(C(=C2C=CC(=[N+](CC)CC)C=C2)c3ccc(cc3)N( |   |   |   | 1 |
| CN\C(=N/C#N)\NCCSCc1[nH]cnc1C                    |   |   |   | 0 |
| ClCc1ccc(Br)cc1                                  |   |   | 0 |   |
| OCCNc1ccc(cc1[N+](=O)[O-])N(CCO)CC(              |   | 1 |   |   |
| c1ccc2ncccc2c1                                   |   | 1 |   | 0 |
| CN\C(=C/[N+                                      | 0 | 0 |   |   |
| CC(C)CCCC(C)C1CCC2C3C=CC4(CC(O)CCC               |   | 1 |   |   |
| CCNCCCNCCCNCCCNCC                                |   | 0 |   |   |
| Oc1ccc2C[C@                                      | 0 | 0 |   | 0 |
| Clc1ccc2CCc3ccccc3N(CCCN4CCC5(CC4)N6CCCCC6NC5    |   |   |   | 0 |
| ClC1=C(Cl)[C@@]2(Cl)[C@@H]3[C@H]4                |   | 0 |   |   |
| CC(C)(C)OC(=O)NC(CN=N#N)C(=O)O                   |   | 1 |   |   |
| CCCCCc1cc(O)c2C3CC(=CC(                          |   | 0 |   |   |
| ClCc1cc(cc(c1)N(=O)=O)N(=O)=O                    |   | 1 |   |   |
| CCCN(CCC)CCC                                     |   | 0 |   |   |
| CN(C)CCOC(C                                      | 0 | 0 |   | 0 |
| COc(=O)C1=C(C)C(C)(O)OC1=O                       |   | 0 |   |   |
| CN[C@@H](i                                       | 0 | 0 |   |   |
| CN(C)[C@@H]1[C@@H]2[C@H](O)[C@                   |   | 0 |   |   |
| CNC1CCc2cc(                                      | 0 | 0 |   |   |
| CCCCC(CC)OC(=O)CCCOc1ccc(Cl)cc1Cl                |   |   |   | 0 |
| ClC1c2cccc3ccc4c5ccccc5cc1c4c23                  |   | 1 |   |   |
| CN(c1c(cc(cc1[N+](=O)[O-]))[N+](=O)[O            |   | 1 |   |   |

|                                           |   |   |   |
|-------------------------------------------|---|---|---|
| CC[C@@H](C                                | 0 |   |   |
| Oc1ccc(Cl)c(Cl)c1Cl                       | 0 |   | 1 |
| CC1=C(C(=O)                               | 0 |   |   |
| ClC1=C(Cl)[C@@]2(Cl)[C@@H]3[C@H]4         | 0 |   |   |
| NCc1ccccc1                                |   |   | 0 |
| CCOC(=O)C(Cl)C(=O)C                       | 0 |   | 0 |
| CCNc1nc(NC(C)(C)C)nc(SC)n1                |   |   | 1 |
| CN1CC(O)C2=C\C(=N\NC(=O)N)\C(=O)C=C12     |   |   | 0 |
| BrCC1=C(Br)C(=O)OC1                       | 1 |   |   |
| Cc1cc(cc(c1C)[N+](=O)[O-])[N+](=O)[O-     | 0 |   |   |
| Cc1ccc(c(N)c1)N(=O)=O                     |   |   | 0 |
| O[C@@H]1C                                 | 0 | 0 | 0 |
| OC1CC=Cc2cccnc12                          | 0 |   |   |
| COC(=O)[C@]12O[C@@]1(C)[C@@](C)           | 1 |   |   |
| CN(C)CCc1c[†                              | 0 |   |   |
| Nc1ccc(c(N)c1)N(=O)=O                     | 1 |   |   |
| Nc1nc(Cl)cc(Cl)n1                         | 0 |   | 0 |
| C[C@@H]1O                                 | 0 | 0 |   |
| [O-][N+](=O)c1ccc2nc3c(cccc3nc2c1)[N      | 1 |   |   |
| O=C1NC(=O)c2cc(ccc12)N(=O)=O              |   |   | 0 |
| OC(=NCc1ccccc1)Cn2ccnc2N(=O)=O            | 1 |   |   |
| CCCC                                      | 0 |   |   |
| CN(C)CCCN1†                               | 1 |   | 1 |
| Nc1ccc(NOS(=O)(=O)O)cc1Cl                 | 1 |   |   |
| Cn1cc2ccc(cc2n1)[N+](=O)[O-]              | 1 |   |   |
| OC(=O)Cc1cc                               | 0 | 0 | 0 |
| ClC(=O)c1c(Cl)c(Cl)c(C(=O)Cl)c(Cl)c1Cl    |   |   | 0 |
| [O-][N+](=O)                              | 0 | 0 |   |
| CCNC(=S)NCC                               | 0 |   | 0 |
| C\C=C\C=N\†                               | 0 | 0 |   |
| NCCC[C@H](N)C(=O)O                        |   |   | 0 |
| CC(C)CCCC(C)C1CCC2C3CC=                   | 0 |   |   |
| COC1C(N)CC(OC2CC(O)(Cc3c(O)c4C(=O)        | 1 |   |   |
| CCc1ccc(\C=C\c2ccc(cc2)[N+](=O)[O-])c     | 1 |   |   |
| CC(C)(O)C(=O)Nc1ccc(c(c1)C(F)(F)F)N(=O)=O |   |   | 1 |
| N(\C=C\C=C\C=C=N\c1ccccc1)c2ccccc2        |   |   | 0 |
| CC[C@H]1NC(=O)c2cc(c(Cl                   | 0 |   |   |
| CCC(CCC(C)C1CCC2C3CC=C4CC(O)CCC4(C        | 0 |   |   |
| COc1cc2C(=O)CCc2c3c(C)cc4ccccc4c13        | 1 |   |   |
| CCCC[N+](C                                | 0 | 0 |   |
| CC1CCC2C(C)C3C(CC4C5CC=C6CC(O)CCC†        | 0 |   |   |
| CN(C1CCCC1)C2CCCC2                        |   |   | 0 |
| CN(C)C(=S)SNCCNSC(=S)N(C)C                | 1 |   |   |



|                                                 |   |   |   |   |
|-------------------------------------------------|---|---|---|---|
| N[C@@H](C                                       | 0 |   |   |   |
| [O-][N+](=O)c1ccc2ccc3nc4ccccc4c5ccc            | 1 |   |   |   |
| CCOCCOCCOCCO                                    |   |   | 0 |   |
| OCCOC(=O)C=C                                    | 0 |   | 0 |   |
| CCN(CC)C(=O                                     | 1 | 0 | 0 |   |
| OCCN(C(=O)CO)c1c(l)c(C(=O)NCC(O)CO)c(l)c(C(=O)N | 0 |   | 0 | 0 |
| S=C1SSC2=NCCN12                                 | 0 |   |   |   |
| Clc1ccccc1C(                                    | 1 | 1 |   |   |
| CC(=O)N(O)c1ccc(C)cc1                           | 0 |   |   |   |
| CCCCCCCCCCCCCCCC#N                              |   |   | 0 |   |
| Cc1cccc2ccc3c4ccccc4ccc3c12                     | 1 |   |   |   |
| Cn1cnc2C(=N)[N+](=O)[CH-]Nc12                   | 1 |   |   |   |
| CCCC(C)C1(CC)C(=O)NC(=NC1=O)[S-]                |   |   | 0 |   |
| C(c1occc1)n2ccccc2                              |   |   | 0 |   |
| Cc1ncc(CNC(:                                    | 0 | 0 | 1 | 0 |
| CCN1C=C(C(=                                     | 0 | 0 | 1 | 0 |
| CCc1ccccc2cc(oc12)C(O)CNC(C)(C)C                | 0 |   |   |   |
| CC(=O)CC(=O)\C=C\C(=O)O                         | 0 |   |   |   |
| CC1CCC(CC1)C(C)(C)OO                            | 1 |   |   |   |
| CCCN(N=O)C(=O)N                                 | 1 |   |   |   |
| CN([C@H](CN1CCCC1)c2cc                          | 0 |   |   |   |
| CCCCCCCCSCN1CN(C)C=C1                           | 0 |   |   |   |
| CCc1ccccc2c(CCO)c[nH]c12                        | 0 |   |   |   |
| OC1C=Cc2c(ccc3c4cccc5cccc(c23)c45)C1            | 1 |   |   |   |
| CC(=O)Oc1cc(C=O)cc2N3CC4C(N4C(=O)               | 1 |   |   |   |
| N[C@@H](C                                       | 0 | 0 |   |   |
| CCC(C)C1NC(                                     | 0 |   |   |   |
| Oc1ccc(O)c2c(O)cccc12                           |   |   | 0 |   |
| CC(C)(C)CCCCC(=O)OCC1CO1                        | 1 |   |   |   |
| COc1cc2CC3N(C)CCc4cc5OCOc5c(c34)c2              | 1 |   |   |   |
| CN1CC[C@@H](CN2c3ccccc3Sc4ccccc2                | 0 |   |   |   |
| CC(C)[C@@H](C)\C=C\[C@@H](C)[C@H]1CC[C@H]2'     |   |   | 1 |   |
| CCOP(=O)(OCC)N=C1SCCS1                          |   |   | 0 |   |
| COC(=O)c1ccc(cc1)C(=O)OC                        | 0 |   | 0 |   |
| CC(=O)Nc1ccc(cc1)[C@H]2O[C@H]2C(=               | 1 |   |   |   |
| N[C@@H](C                                       | 0 | 0 |   |   |
| Oc1ccc(cc1)C2(OC(=O)c3c                         | 0 |   | 1 |   |
| CCN(CCCCO)N=O                                   | 1 |   |   |   |
| C[N+]1(C)[C(                                    | 0 | 0 |   |   |
| OCC(O)C(O)C(O)C(O)CO                            | 0 |   |   | 0 |
| O=C1N(SC2CCCC2)C(=O)c3ccccc13                   | 0 |   | 1 |   |
| OC(c1ccc(Cl)cc1)(c2ccc(Cl)cc2)c3cccn3           |   |   | 1 |   |
| Clc1ccccc1\C=C\O                                | 1 |   |   |   |

|                                             |   |   |
|---------------------------------------------|---|---|
| CN(C)C1C2CC3C(C(=O)c4c(O)cccc4C3(C)         | 0 |   |
| COc1cccc1N                                  | 1 | 1 |
| CC(C)Cc1ccc(                                | 0 | 0 |
| CC(=O)c1ccc(O)cc1                           |   | 0 |
| [O-][N+](=O)c1ccc2ccc3cccc4C5OC5c1c         | 1 |   |
| C(Nc1ncnc2nc[nH]c12)c3o                     |   | 0 |
| [O-][N+](=O)c1ccc2c(ccc3c4cccc4ccc2         | 1 |   |
| Oc1ccc(cc1)C                                | 0 | 0 |
| CC(N)Cc1c[nl                                | 0 | 0 |
| CCN1C=C(C(=                                 | 0 | 0 |
| CC[N+](CC)(CC)CCOc1ccc(\                    |   | 0 |
| O=N(=O)c1cccc(c1)N(=O)=O                    | 1 | 0 |
| CO\N=C(\C(=O)N[C@H]1[C@H]2SCC(=C(N2C1=O)C(= |   | 0 |
| CCCC1CCC(=O)CC1                             |   | 0 |
| CCOP(=O)(OCC)OP(=O)(OCC)OCC                 |   | 0 |
| OC(C(O)C(=O)OCCBr)C(=O)OCCBr                | 1 |   |
| OC(=O)c1c2cccc2cc3cccc                      |   | 0 |
| O=Cc1cccc1                                  | 0 | 0 |
| CC1=CCC2C(C1)C(CC=C2C)C(C)(C)C              | 0 |   |
| Cc1ccc(cc1)N=Nc2c(O)ccc3cccc23              | 0 |   |
| CC(=O)OCC1=                                 | 0 | 0 |
| ClC[C@H]1CO1                                | 1 |   |
| COc1ccc(\C=N\nc2nnc3c4cccc4nc3c2O)          | 1 |   |
| CCCCCCCCC(CC)c1ccc(cc1)S(=O)(=O)O           |   | 0 |
| O[C@@H]1C=Cc2c([C@H]1O)c3ccc4ccc            | 1 |   |
| Nc1nc(cs1)c2ccc(s2)[N+](=O)[O-]             | 1 |   |
| CCCCC1C(=O)NC(=O)N(C2CCCC2)C1=O             |   | 0 |
| C\C(=C\1/C(=O)OC(=CC1=O)C)\[O-]             |   | 0 |
| CCCCC\C=C/C=C/C(=O)OCC                      |   | 1 |
| COC(=O)C(N)                                 | 0 | 0 |
| CC(=O)Nc1ccc(Oc2ccc(NC(=O)C)cc2)cc1         | 0 |   |
| Nc1ccc(Sc2ccc(cc2)N(=O)=O)cc1               | 1 |   |
| [O-][n+]1cccc2C=CC3OC3c12                   | 0 |   |
| CCN(N=O)C(=O)N                              | 1 | 0 |
| C\C(=C\CO)\C=C/C=C(/C)\C=C/C1=C(C)C         | 1 |   |
| CC(C)CCCCCCCCCCCCC(=O)O                     |   | 0 |
| Cc1cc(cc(c1O)N(=O)=O)N(=O)=O                |   | 1 |
| OCC1OC(Oc2cccc3C(=O)c4cccc(O)c4C(=          | 1 |   |
| C=CCCCC1CO1                                 | 1 |   |
| CN(C)C(=O)Nc1ccc(C)c(Cl)c1                  | 0 |   |
| CCCCCOC(=O)C(=C)C                           | 0 |   |
| ClCCNCCCNc1c2cccc2nc3c1ccc4ccnc34           | 1 |   |
| CC1CN(CC(C)N1N=O)N=O                        | 1 |   |



|                                                      |   |   |   |
|------------------------------------------------------|---|---|---|
| CN1CCC2Nc3ccc(C)cc3C2C1                              |   |   | 0 |
| [O-]C(=O)C(F)(F)C(F)(F)C(F)(F)C(F)(F)C(F)(F)C(F)(F)C |   |   | 0 |
| FC(Cl)(Cl)C(F)(Cl)Cl                                 |   | 1 | 0 |
| CC[C@@H]1                                            | 0 | 0 |   |
| CC(C)N(CC[C                                          | 1 |   | 1 |
| C(N1CCCCC1)N2CCCCC2                                  |   |   | 0 |
| O[C@@H]1c2ccccc2c3ccc(cc13)[N+](=C                   | 1 |   |   |
| O=N(=O)c1ccc2c(c1)sc3ccccc23                         | 1 |   |   |
| ClC(Cl)(Cl)c1ccccc1                                  | 1 |   | 0 |
| OC(=O)C1C(C(=O)O)C2(Cl)C(=C(Cl)C1(Cl                 | 0 |   | 0 |
| CCOC(=O)O[                                           | 0 | 0 | 0 |
| Nc1ccc(cc1)c2cc(Cl)c(N)c(Cl)c2                       | 1 |   |   |
| Oc1ccc2ccc3cc4ccccc4c5ccc1c2c35                      | 1 |   |   |
| [O-][N+](=O)c1ccc(Cl)cc1                             | 1 |   |   |
| CNC(C)CCC=C(C)C                                      |   |   | 0 |
| NCCO\C=C\C                                           | 0 | 0 |   |
| CN(C)CC[C@@H](c1ccc(Cl)cc1)c2ccccc2                  |   |   | 0 |
| CCOC(=O)NCCCN(C)C                                    |   |   | 0 |
| CC[C@]12CC                                           | 0 | 0 | 0 |
| OC[C@H]1O[C@@H]2O[C@H]3[C@H](O)[C@@H](O              |   |   | 0 |
| COc1cc(C)cc(O)c1                                     |   |   | 0 |
| Oc1ccc(cc1)c                                         | 0 |   |   |
| Oc1ccc2c3ccccc3c4c(ccc5ccc1c2c45)N(=                 | 1 |   |   |
| C\C=C/1\C(=O)C[C@H]2[C@@H]3CCC4=CC(=O)CC[C@          |   |   | 0 |
| CCCCc1cc(C)cc(CCCC)c1O                               |   | 0 |   |
| C\C=C\1/C(=                                          | 0 |   |   |
| CCCN(CCC)CCc1ccc(O)c(O)                              |   | 0 |   |
| CCCCCCCCCCCC(=O)OC[C@@H](O)C1OC[C@H](O)[C@           |   |   | 0 |
| OC(=O)Cc1c[                                          | 0 | 0 | 0 |
| CCC(CCC(C)O)COC(=O)c1ccccc1C(=O)O                    |   |   | 0 |
| COc1ccc(OC)c(\C=C\C)c1                               |   |   | 0 |
| BrC1ccc2C3CCCCC3C4OC4c2c1                            |   |   | 0 |
| CCCCCN(C)CCC(O)(P(=O)(C                              |   | 0 | 0 |
| C[C@]12Cc3                                           | 1 |   |   |
| CCCC(NC(=O)C(CC(C)C)N(                               |   | 0 |   |
| C[N+]1(CCF)[C@H]2CC[C@@H]1CC(C2)OC(=O)C(O)(c         |   |   | 0 |
| CC(C(O)c1ccc                                         | 1 | 1 |   |
| CC12CCCC(C)(C1CCC34CC(CCC23)C(=C)C                   |   |   | 0 |
| NC1=NC(=O)                                           | 0 | 0 |   |
| OCCNc1ccc(cc1OCCO)N(=O)=O                            |   |   | 0 |
| CCOC(=O)CC(=O)CCl                                    |   | 0 |   |
| O=C1C=CC=C2C3CC(CN12)                                |   | 0 |   |
| CCC(O)C(C)(C)C                                       |   |   | 0 |

|                                                   |   |   |   |   |
|---------------------------------------------------|---|---|---|---|
| OCCNc1ccc(cc1)N=Nc2ccc(cc2)N(CCO)C                | 0 |   |   |   |
| CNc1ccc(cc1)N(=O)=O                               |   |   | 0 |   |
| CN(C)CCCSC(=N)N                                   | 0 |   |   |   |
| N[C@@H]([C@@H](O)c1ccc(O)c(O)c1)C(=O)O            |   |   | 1 |   |
| OC(=O)CCOC(=O)C=C                                 |   |   | 0 |   |
| C\C=C/C=C/                                        | 0 | 0 |   | 0 |
| ClCc1c2ccccc2cc3c1ccc4ccccc34                     |   |   | 1 |   |
| CCCCOC(=O)C                                       |   |   | 0 | 0 |
| CC(=O)O[C@]                                       | 0 | 0 |   | 0 |
| CCOC(=O)CC(=O)C                                   |   |   | 0 | 0 |
| Oc1ccc(cc1)C2Oc3ccc4cc3C2C(=O)N5CC                |   |   | 1 |   |
| CN(C)CCNC(=O)c1cccc2nc(oc12)c3ccccc3              |   |   | 0 |   |
| COC(=O)C(C)O                                      |   |   |   | 0 |
| COc1cc(ccc1[n+])2nc(nn2c3ccc(cc3)N(=O)=O)c4ccccc4 |   |   |   | 0 |
| Nc1nc(nc2c1ncn2C3OC(CO)C(O)C3O)c4c                |   |   | 1 |   |
| CC(=O)OCc1c2ccccc2cc3ccccc13                      |   |   | 1 |   |
| CN1CCC=C1N                                        | 0 | 0 |   | 0 |
| CC(C)c1ccc(CO)cc1                                 |   |   |   | 0 |
| Cc1c2ccccc2c(CCl)c3ccc4ccccc4c13                  |   |   | 1 |   |
| CC(=C)C(=O)OCCO                                   |   |   | 0 | 0 |
| CCCCNC(=O)\C=C\c1oc(cc1)[N+](=O)[O-]              |   |   | 1 |   |
| CC1=C(C=C)c:                                      | 0 |   |   |   |
| C[C@]12CC[C@]                                     | 0 | 1 |   | 1 |
| CN1C(=O)N(C)                                      | 0 |   | 0 |   |
| COc1cc(\C=C\C(=O)N2CCC                            |   |   | 0 |   |
| NC(=S)N[S+](=O)([O-])c1c                          |   |   | 0 |   |
| ClC(Cl)C(=O)N1CCN(C1=O)c2ncc(s2)N(=               |   |   | 1 |   |
| COc1ccc(cc1)\C(=C/C(=O)O)\Br                      |   |   | 1 |   |
| NCCCC(N)CC(                                       | 0 | 0 |   |   |
| O=C1Nc2c(C=C1)[nH]cc2C:                           |   |   | 0 |   |
| CC(=O)C1C(=O)C=C2Oc3c(                            |   |   | 0 |   |
| Oc1ccc(Cl)cc:                                     | 0 | 0 | 1 | 1 |
| CC(C)[C@@H]1CC[C@@H]                              |   |   | 0 |   |
| OCCc1ccc(cc1)[N+](=O)[O-]                         |   |   | 1 |   |
| Cc1c(cc(cc1[I                                     | 0 | 0 |   |   |
| O=Nc1ccc2ccc3ccc(c4ccc1c2c34)N(=O)=               |   |   | 1 |   |
| Oc1ccc(cc1)c2ccc(O)cc2                            |   |   | 0 | 1 |
| C[C@H]1CN(C[C@@H](C)N1)c2c(F)c(F)c3C(=O)C(=CN     |   |   |   | 0 |
| Clc1cnc2ccccc2c1                                  |   |   | 0 |   |
| CC1(C)S[C@@H]2[C@H](N)C(=O)N2[C@H]1C(=O)O         |   |   |   | 0 |
| CC(=O)OC1COC(Nc2ccc(cc2)C(=O)O)C(C                |   |   | 0 |   |
| CC(O)C(=O)C                                       |   |   | 0 | 0 |
| CCCCN(CCC(=O)OC)N=O                               |   |   | 1 |   |

|                                                      |   |   |   |   |
|------------------------------------------------------|---|---|---|---|
| CC1C(O)CCC2=CC(=O)C3(OC3C12C)C4OC                    |   |   | 1 |   |
| CN1CCO[C@H]1C                                        | 0 | 0 |   |   |
| O=CC1CCC=CC1                                         |   |   |   | 0 |
| NN1C(=O)c2ccccc2C1=O                                 |   |   | 0 |   |
| NC1CCN(C1)C                                          | 0 | 0 | 1 | 0 |
| OCC=CCl                                              |   |   | 1 |   |
| CC1CCCN(C1)N=O                                       |   |   | 1 |   |
| NC(C(=O)O)c1ccccc1                                   | 0 | 0 |   |   |
| CCCCCN(C)CC                                          | 0 | 0 |   |   |
| OC1C(O)c2cccc3c4c(ccc5ccccc45)C6(OC                  |   |   | 1 |   |
| CC(C)C1C(C)C(C)(C)c2cc(C)c(cc12)C(=O)O               |   |   | 0 |   |
| CCOP(=O)(OCC)O\C=C/Br\c1ccc(Cl)cc1                   |   |   | 0 |   |
| OS(=O)(=O)c1ccc(cc1)N(=O)=O                          |   |   | 0 |   |
| CS(=O)(=O)C                                          | 0 |   | 1 | 0 |
| Cc1nc(N)c(C)c2c3ccccc3[nH]c12                        |   |   | 1 |   |
| CC(=O)OCCc1ccccc1                                    |   |   |   | 0 |
| C(Cc1cccc2ccccc12)C3CO3                              |   |   | 1 |   |
| OCS(=O)[O-]                                          |   |   |   | 0 |
| OC\C=C\C(=O)O                                        |   | 0 |   |   |
| c1ccc2c3ccccc3c4ccccc4c2c1                           |   |   | 1 |   |
| COc1ccccc1OC                                         |   |   |   | 0 |
| CCC(C)(C)C(=O)O                                      | 0 | 0 |   |   |
| CCOP(=S)(OCC)Oc1ccc(cc1)S(=O)C                       |   |   | 0 | 0 |
| COc1cnc(N[S+](=O)([O-])c1ccccc1                      |   | 0 |   |   |
| OC(=O)C1CCr                                          | 0 | 0 |   |   |
| CCCCCCCCC(=O)O                                       | 0 | 0 | 0 | 0 |
| [O-][N+](=O)c1oc(cc1)c2cscn2                         |   |   | 1 |   |
| [O-]S(=O)(=O)c1ccccc1C=O                             |   |   |   | 0 |
| Cc1cn[nH]c1                                          | 0 | 0 |   | 0 |
| CC(=O)c1ccc(Cl)c(Cl)c1Cl                             |   |   | 1 |   |
| O=NN1CCOCC1                                          |   |   | 1 | 0 |
| COC1=C(C#N)C(=O)N(C)C=O                              |   | 0 |   |   |
| C[C@@H](N)C(=O)O                                     | 0 | 0 |   | 0 |
| COP(=S)(OC)SCC(=O)NCC=O                              |   |   | 0 |   |
| CC1=NN=C(c2ccc(N)cc2)c3ccccc13                       |   | 0 |   |   |
| CC1(C)N(Cl)C(=O)N(Cl)C1=O                            |   |   | 0 | 0 |
| CC(=O)C1=C(O)C=C(C)OC1=O                             |   |   | 0 |   |
| CC(C)(C)c1cc(C=Cc2cc(c(O)c(c2)C(C)(C)C               |   |   | 0 |   |
| OC(=O)CCC(=O)Nc1ccc(Cl)c(Cl)c1Cl                     |   |   | 0 |   |
| Oc1ccc(cc1S(=O)(=O)[O-])C2(OC(=O)c3c(Br)c(Br)c(Br)C2 |   |   |   | 0 |
| O=C1NC(=O)C1                                         | 0 | 0 | 0 | 0 |
| OC1ccccc1C(=O)OC2ccccc2                              |   |   | 0 | 0 |
| CC(C)[C@H]1CC[C@H](C)C[C@H]1O                        |   |   | 0 | 0 |

|                                              |   |   |   |
|----------------------------------------------|---|---|---|
| CCCN(CCC)[S+](=O)([O-])c                     | 0 |   |   |
| C[N+](C)(C)CC(O)CC(=O)[O-]                   |   |   | 0 |
| CC=N(=O)O                                    |   | 0 |   |
| COc1cccc(NC(=O)c2csc(c2)[N+](=O)[O-])        | 1 |   |   |
| O=N(=O)c1ccc2Oc3ccccc3Oc2c1                  | 1 |   |   |
| Clc1ccc(CC[C@@H](O)C)cc1                     | 1 | 0 |   |
| CC(C)NC[C@@H](O)C                            | 0 | 0 |   |
| CC(=C)C(=O)OC[C@H]1CO1                       |   |   | 1 |
| CC(C)CNC(=O)\C=C\c1oc(cc1)[N+](=O)[O-]       | 1 |   |   |
| CC(C)CCOC(=O)c1ccc(cc1)F                     |   |   | 0 |
| CN1C(c2ccc(cc2)C)C1                          | 0 |   | 0 |
| CC(C)(CC(=O)O)C(=O)O                         |   |   | 0 |
| OC(=O)c1cccc(c1)N(=O)=O                      | 1 |   | 0 |
| CCOC(=O)c1ccc(cc1)N(O)C=O                    | 0 |   |   |
| c1cnc2c(c1)ccc3cc[nH]c23                     | 0 |   |   |
| Cc1cc2cccc3ccc4cc5ccccc5c1c4c23              | 1 |   |   |
| O=C1N(C[C@@H](O)C)C1                         | 1 | 0 |   |
| CCCCCC=O                                     |   |   | 0 |
| COC(=O)C(N)CSCC                              | 1 |   |   |
| NCCNc1cccc(c1)C                              | 0 | 1 |   |
| [NH-]c1on[nH]c1                              | 0 | 0 |   |
| CC[N+](C)(C)CCC(=C(c2ccccc2)c3ccccc3)C1C     |   |   | 0 |
| O=N(=O)c1cccc2ccccc12                        | 1 |   | 1 |
| C\C=C/CNc1ncnc2nc[nH]c12                     | 0 |   |   |
| [O-]S(=O)(=O)CC=C                            |   |   | 0 |
| OC[C@H]1O[C@@H](O)C1                         | 0 | 0 |   |
| OC[C@H]1O[C@@H](O)C1                         | 0 | 0 |   |
| CCCCOc1cc(CCN(C(=O)N)C)cc1                   | 0 |   |   |
| CC(C)(C)c1cc(Cc2cc(c(O)c(c2)C(C)(C)C)C)cc1   | 0 |   | 0 |
| NC(=O)NNC(=O)N                               | 0 |   |   |
| COc1cccc2c(NCCCNCCCl)c3ccccc3nc12            | 1 |   |   |
| CCN(C(=O)C)C                                 | 0 | 0 | 0 |
| CCCCOS(=O)(=O)C                              | 1 |   |   |
| CCCCCCCCCOC(=O)c1cccc1C(=O)OCCCCCCCCC        |   |   | 0 |
| C=CC(=O)N1CCOCC1                             |   |   | 0 |
| O=C1c2cc(cc(c2c3c1cc(cc3N(=O)=O)N(=O)N)C)C1  | 1 |   |   |
| CC1C=C(C(=O)C(C=O)C(O)C2CC(C)(C)CC1)C1       | 0 |   |   |
| C[S+](=O)([O-])c1ccc(cc1)F                   | 0 |   |   |
| CC1(CO1)C(=O)NCc2ccccc2                      | 1 |   |   |
| CCOC(=O)c1cccc2ccnc12                        | 0 |   |   |
| [O-][N+](=O)c1ccc2c3CCCCc3c4c(ccc5ccn5)cc2c1 | 1 |   |   |
| NS(=O)(=O)c1cccc2ccnc12                      | 0 |   |   |
| COc1nsc2c(cccc12)[N+](=O)[O-]                | 1 |   |   |

|                                      |   |   |   |
|--------------------------------------|---|---|---|
| CC(=O)OC1(CCC2C3C(CCC12C)C4(C)C5CC   | 0 |   |   |
| Cc1c2ccccc2cc3c4C=CC(O)C(O)c4ccc13   | 1 |   |   |
| CCNC[C@H](                           | 0 | 0 |   |
| CC1CC=C(C)C(\C=C\C(O)C)C1(C)C        |   |   | 0 |
| Cc1onc(c1)C(                         | 0 |   | 0 |
| CNCC(=O)c1ccc(O)c(O)c1               |   |   | 0 |
| OCCN(CCO)c1nc(nc2ccccc12)c3cccs3     | 0 |   |   |
| CCCCON(OC(=O)C)C(=O)c1ccc(C)cc1      | 1 |   |   |
| COc1=C(N)C(=O)c2nc(ccc2C1=O)c3nc(C   | 1 |   |   |
| FC(F)(F)C(F)(F)C(F)(F)C(F)(F)I       | 0 |   |   |
| Nc1ccc(cc1)S                         | 0 | 0 | 0 |
| CC1=CC[C@H]2C[C@H]1C2(C)C            |   |   | 0 |
| CC1CN(CCN1                           | 0 |   |   |
| [O-][N+](=O)c1ccc2ccc3cc4C=CCc4c5cc  | 1 |   |   |
| NNc1nc(cs1)c2ccc(N)cc2               | 1 |   | 1 |
| [O-][N+](=O)c1ccc2nc(ccc:            | 0 |   |   |
| [O-][N+](=O)C1=Cc2cccc3ccccc(O1)c23  | 1 |   |   |
| CC1NC(Cc2c1[nH]c3ccccc23)C(=O)O      | 0 |   |   |
| CC(C)CC=O                            | 0 |   | 0 |
| Cc1ccc(O)cc1OP(=O)(Oc2ccc(O)cc2C)Oc  | 0 |   |   |
| Nc1c(Cl)cc(Cl)cc1Cl                  | 0 |   |   |
| NCCCN1CCOCC1                         |   |   | 0 |
| CCCCOC(=O)COc1ccc(Cl)cc1Cl           | 0 |   | 0 |
| O=C(OCC1CO1)C2CCCCC2C(=O)OCC3CO:     | 1 |   | 0 |
| CNC1(CCCCC:                          | 0 | 0 | 0 |
| Oc1cccc2c1c(cc3[nH]c4ccc5ccccc5c4c23 | 1 |   |   |
| COc1ccc(\C=                          | 0 | 0 |   |
| CC(C)c1cc(c(                         | 0 | 0 |   |
| CCC[N+](CCC)(CCC)CCC                 |   |   | 0 |
| CCN(CCCl)Cc:                         | 0 | 0 |   |
| BrCCOC(=O)C=C                        | 1 |   |   |
| COP(=NC(=O)C)(O)SC                   | 0 |   |   |
| COc1cc2N3C4C5C(CC3=O)OCC=C6CN7C      | 0 |   |   |
| C[C@@H](CC(=O)O)C(=O)O               | 0 |   |   |
| CCC#CC(C)C1(CC=C)C(=O)NC(=O)N(C)C1   | 0 |   |   |
| CC(C)(C)NC[C                         | 0 | 0 |   |
| Cc1ccc(cc1S(=O)(=O)O)[N+](=O)[O-]    | 0 |   |   |
| C1CC2(CCO1)CO2                       | 1 |   |   |
| CCCCCCCCCCCCCCCC(=O)N                | 0 |   |   |
| CCCCCCCCCCCCOC(=O)C(=C)C             | 0 |   | 0 |
| COc1ccc(cc1)                         | 0 | 0 |   |
| Nc1nnc[nH]1                          |   |   | 0 |
| Nc1ccc2cccc3c4ccccc4c1c23            | 1 |   |   |

|                                                    |   |   |   |
|----------------------------------------------------|---|---|---|
| CCC(=O)N(C1CCN(CC(O)c2ccccc2)CC1)c3ccccc3          |   |   | 0 |
| C[N+](C)(C)CCNC(=O)C=C                             | 0 |   |   |
| OS(=O)(=O)c1ccc(cc1)[N+](=O)[O-]                   | 0 |   |   |
| COc1cc2OC[C@H]3Oc4c5C                              | 0 |   |   |
| COc1cc(N[C@H](C)CCCN)c2ncccc2c1                    | 1 |   |   |
| Oc1ccc2CC3N(CC4CC4)CC[                             | 0 |   |   |
| CCn1c(N)nc2c3nc(C)cnc3ccc12                        | 1 |   |   |
| CC(=O)c1ccc[nH]1                                   | 1 |   | 0 |
| CC(=O)NCCCC                                        | 0 | 0 | 0 |
| CC[N+](CC)(C                                       | 0 | 0 | 0 |
| CC(Br)C(=O)NCc1ccc(Cl)cc1                          | 1 |   |   |
| COc1cc2OC(=C(O)C(=O)c2cc1OC)c3ccc(                 | 0 |   |   |
| CC[C@@H]1CN2CC[C@@                                 | 0 |   |   |
| CO[C@@H]1                                          | 1 | 0 |   |
| C[C@]12CC[C@H]3[C@@H](CCC4=C3CCC(=O)C4)[C@         |   |   | 0 |
| NC(=O)CNC(=O)N(CCCl)N=O                            | 1 |   |   |
| CN1CCN(CC1                                         | 0 | 0 | 1 |
| O=N(=O)c1ccc(cc1)N(=O)=O                           | 1 |   |   |
| CS(=O)(=O)Nc1ccc(Nc2c3ccccc3nc4cccc                | 1 |   |   |
| Nc1cc2c3C=C[C@@H](O)[C@H](O)c3cc                   | 1 |   |   |
| CC(N)(COP(=O)(O)O)C(=O)                            | 0 |   |   |
| Oc1cccc2c1ccc3[nH]c4ccc5ccccc5c4c23                | 1 |   |   |
| CC(Cl)(Cl)C(=O)[O-]                                |   |   | 0 |
| CC1(C)C2CCC1(C)C(=O)C2=O                           | 0 |   | 0 |
| CC(C)CC(=O)OCC1=CO[C@@H](OC(=O)C                   | 1 |   |   |
| Cn1c(N)nc2nc3cnccc3cc12                            | 1 |   |   |
| Cc1cc(C)c(C(=O)P(=O)(C(=O)c2c(C)cc(C)cc2C)c3ccccc3 |   |   | 0 |
| O=C(Nc1snc2ccccc12)c3ccccc3                        | 1 |   |   |
| N[C@@H]1C                                          | 0 | 0 |   |
| COc1cc(c(O)c(c1)C(C)(C)[N+](=O)[O-]                | 0 |   |   |
| C[C@H]1OC=C2C(=C(C(=O)O)C(=O)C(=C                  | 0 |   |   |
| CCN(CC)CCSC                                        | 1 | 1 | 0 |
| CN(C(=O)CCCl)c1snc2ccccc12                         | 1 |   |   |
| OC(=O)CCCC                                         | 0 | 0 | 0 |
| COc1cccc2OC(=CC(=O)c12                             | 0 |   |   |
| ClC(=C1CC(=O)NC1=O)Cl                              | 1 |   |   |
| CC(=O)O[C@H]1CC[C@]2(C)[C@H]3CC[C@@]4(C)[C@        |   |   | 0 |
| CSCCC(=O)N1C(CSC1c2ccccc2O)C(=O)O                  | 0 |   |   |
| CO[C@@H]1                                          | 0 | 0 |   |
| CC1C2CCC3C                                         | 0 | 0 |   |
| Fc1c(F)c(Cl)c(F)c(Cl)c1F                           | 0 |   |   |
| COc1ccc2[nH]c(nc2n1)[S+]                           | 0 |   |   |
| OS(=O)(=O)c1ccc(cc1[N+](=O)[O-])[N+]               | 0 |   |   |

|                                                 |   |   |   |   |
|-------------------------------------------------|---|---|---|---|
| [O-]S(=O)(=O)[S-]                               |   |   | 0 |   |
| CNC(=O)c1cc                                     | 1 | 0 | 1 | 1 |
| CNP1(NC)NP(NC)(NC)NP(NC)(NC)N1                  |   |   | 0 |   |
| CC\C=C/CCOC(=O)C(C)C                            |   |   | 0 |   |
| Nc1nc(cs1)\C(=N/O)\C(=O)N[C@H]2[C@H]3SCC(=C(I   |   |   | 0 |   |
| CC12CCCC(C)(C1CCC34CC(CCC23)C(=C)C              |   |   | 0 |   |
| O=N(=O)c1ccc2c(oc3ccc(cc23)N(=O)=O              |   |   | 1 |   |
| c1ccc(nc1)c2cccc(n2)c3cccn3                     |   |   | 1 |   |
| N#CC1=C(SCCS1)C#N                               |   |   | 0 |   |
| CC(C)NC[C@@H](O)COc1c                           |   | 0 | 0 |   |
| CC12CCC3C(CCC4=CC(=O)CCC34C)C1CCC               |   |   | 0 |   |
| CCOc1ccc(C[C@H]2NC(=O)CCSSC[C@H](NC(=O)[C@H     |   |   | 0 |   |
| BrC1c(Br)c(Br)c2C(=O)OC(=O)c2c1Br               |   |   | 0 |   |
| C[NH2+]CCCC                                     |   | 0 |   |   |
| CC1COc2ccccc2N1C(=O)C(Cl)Cl                     |   |   | 0 |   |
| CC1(C)S[C@H                                     |   | 0 | 0 |   |
| COC1CC(=C(c                                     |   | 0 | 0 |   |
| CNc1cc(Oc2ccc(N)cc2)ncn1                        |   |   | 1 |   |
| CC(=O)NNc1ccccc1                                |   |   | 1 | 0 |
| [O-][N+](=O)c1cc2[nH]c3cc(c4ccccc4c3c           |   |   | 1 |   |
| C(Oc1ccc(cc1)C(C(c2ccc(OCC3CO3)cc2)c4ccc(OCC5CO |   |   | 0 |   |
| C[C@H]1O[C@H](C[C@H](O)[C@@H]1O[C@H]2C[C@       |   |   | 1 |   |
| ONC(=O)c1ccc(O)c(O)c1                           |   |   | 1 |   |
| CC(=O)OCC1:                                     |   | 0 | 0 |   |
| N[C@@H](Cc1ccc(F)cc1)C                          |   |   | 0 |   |
| Oc1cc(O)ncn1                                    |   |   | 0 |   |
| C[C@](N)(Cc                                     |   | 0 | 0 | 0 |
| O=C(NCCc1c[                                     |   | 0 | 0 | 0 |
| COc1cc(C=O)ccc1OC(=O)C(C)C                      |   |   | 0 |   |
| OCC(O)C(O)C(O)C(NC(=O)N(CCCl)N=O)(              |   |   | 1 |   |
| N[C@H](C(=O)N1[C@@H](C[C@@H]2C[C@H]12)C#N       |   |   | 0 |   |
| O=C(O[C@H]                                      |   | 1 | 1 |   |
| Cc1ccc(cc1N(                                    |   | 0 | 0 |   |
| CC[C@@]1(O)C(=O)OCC2=                           |   |   | 0 |   |
| O=N(=O)c1ccc(C=Cc2ccc(cc2)C#N)cc1               |   |   | 1 |   |
| O=C1c2ccccc2c3cc4ccccc4cc13                     |   |   | 1 |   |
| C=O                                             |   |   | 0 |   |
| CN(C)CCNC(=O)c1cccc2cc3ccccc3cc12               |   |   | 1 |   |
| S=C(NC1CCC(                                     |   | 0 | 0 |   |
| CC(C)c1cccc(                                    |   | 0 | 0 | 1 |
| FC(F)(F)CCl                                     |   |   | 0 |   |
| CCC(COC(=O)CCS)(COC(=O)CCS)COC(=O)CCS           |   |   | 0 |   |
| NS(=O)(=O)c                                     |   | 0 |   | 0 |

|                                                |   |   |
|------------------------------------------------|---|---|
| O=N(=O)c1ccccc1c2ccccc2                        | 0 | 0 |
| CCN                                            | 0 | 0 |
| O[C@@H]1Cc2cc3cccc4ccc5ccc1c2c5c3              | 1 |   |
| CC1(C)CC(C(=O)O)C(C)(C)N1O                     | 0 |   |
| C1CCN(CCCl)C1=CNC(=O)NC1=O                     |   | 0 |
| Cc1cccc(C)c1NC(=O)CN2C(                        | 0 | 0 |
| CC\C=C\C                                       | 0 |   |
| [O-][N+](=O)c1ccc(c2ccccc2[N+](=O))[O          | 1 |   |
| CCCC1(C)C(C#N)(C#N)C1(C                        | 0 |   |
| CCCC1C(=O)N2N(C1=O)c3cc(C)ccc3N=C2N(C)C        |   | 0 |
| C[C@H]1CCC                                     | 0 | 0 |
| CC12CCC3C(C                                    | 0 | 0 |
| CCCCCCCCCCCCCCCC(=O)OC[C@H](O)[C@H]1OC(=O)C    |   | 0 |
| CN1CCc2c(Cl                                    | 1 |   |
| C\C=C/1\CC(C)C(C)(OC(=O)C)C(=O)OCCz            | 1 |   |
| CC(Cc1ccccc1                                   | 0 |   |
| CC1CC[C@@]2(OC1)O[C@                           | 0 |   |
| ClC1=C(Cl)C(=O)C(=C(C#N)C1=O)C#N               | 0 |   |
| C[N+]1(C)CC(                                   | 0 | 0 |
| Oc1ccc(Cc2ccccc2O)cc1                          | 0 | 1 |
| Nc1ncnc2c1ncn2[C@@H]z                          | 0 |   |
| [O-][N+](=O)c1ccc2ccc3cccc4C(=O)C(=C           | 1 |   |
| N[C@@H](C                                      | 0 | 0 |
| Oc1nc(Cl)nc(Cl)n1                              | 0 |   |
| CCCCCCCCC(=O)N[O-]                             |   | 0 |
| [O-][N+](=O)c1ccc2ccc3c(cccc3c2c1)[N-          | 1 |   |
| O[C@H]1C=Cc2c(ccc3c4C=Cc5cccc(cc23             | 1 |   |
| Cn1cnc(c1c2ccccc2)[N+](=O)[O-]                 | 0 |   |
| Nc1cc(cc(Cl)c1O)N(=O)=O                        | 1 |   |
| C\C(=C\C=C\C                                   | 0 | 0 |
| N[C@H](CCCNC(=N)N)C(=                          | 0 |   |
| CCC\C(=N\OCC)\C1=C(O)CC(CC(C)SCC)CC1=O         |   | 0 |
| CCCN(CCCCO)N=O                                 | 1 |   |
| ClCC1=CC(=O)OC1                                | 1 |   |
| COc1cc(N)ccc1C                                 | 1 | 0 |
| C\C(=C/C=C/C(=C/C(=O)O)/C)\C=CC1=C(C)CCCC1(C)C |   | 1 |
| N[S+](=O)([O-])c1ccccc2c3                      | 0 |   |
| C[C@H]1O[C                                     | 0 | 1 |
| CN1CCc2cccc3c2C1Cc4ccc(                        | 0 |   |
| Cc1cccc(c1)C(=O)O                              | 0 | 0 |
| CCCC[C@H]                                      | 0 | 0 |
| Cc1[nH]c2ccc                                   | 0 | 0 |
| CC(=O)CC(=O)C                                  | 0 | 0 |





|                                                                                   |   |   |   |
|-----------------------------------------------------------------------------------|---|---|---|
| CCCC(=O)Nc1                                                                       | 0 | 0 |   |
| NC(=N)c1ccc(cc1)c2cc3ccc(cc3[nH]2)C(=O)N1=C(NC\C=C/COc2cc(CN3CCCC3)ccn2)C(=O)C1=O |   |   | 0 |
| CN(C)C1C2C(                                                                       | 0 | 0 | 0 |
| CCOC(=O)C(C)O                                                                     |   |   | 0 |
| CC1C(C)(C)Nc2ccccc2C1(C)C3C(C)(C)Nc4                                              |   |   | 0 |
| ClC(Cl)C(=O)N1CCOC12CCCCC2                                                        |   |   | 0 |
| Cc1cnc2ccc3c(nc(NS(=O)(=O)O)n3C)c2n                                               |   |   | 0 |
| CCCCCCC(O)CCOC(=O)C                                                               |   |   | 0 |
| Cc1ccc(cc1)N(N=O)C2OCC(O)C(O)C2O                                                  |   |   | 1 |
| COc1cc2nc3cc(N)ccc3nc2cc1N                                                        |   |   | 1 |
| COc1cc2C(=O)c3cccc3C(=O)c2c(OC)c1C                                                |   |   | 0 |
| OCC#N                                                                             |   |   | 0 |
| C[C@]12CCCi                                                                       | 0 | 1 |   |
| Cc1ncc2COP(=O)(O)OCc2c                                                            |   | 0 |   |
| CCCc1c(nn(c2                                                                      | 0 |   |   |
| COc1c(O)cc2C(=O)O[C@@H]3[C@@H](O)[C@H](O)[                                        |   |   | 0 |
| C[C@H]1CN(N=O)C(=O)NC1=O                                                          |   |   | 1 |
| COc1ccnc(CS(=O)c2nc3cc(OC(F)F)ccc3[n-]2)c1OC                                      |   |   | 0 |
| CN1CCN(CC1)c2ccc3[nH]c(nc3c2)c4ccc5                                               |   |   | 0 |
| C[C@H](CCC(                                                                       | 0 | 0 |   |
| NC(CCCN(N=O)C(=O)N)C(=O)O                                                         |   |   | 1 |
| Cc1ccc(O)c(N)c1                                                                   |   |   | 1 |
| CC12CC3CC(C                                                                       | 0 | 0 | 0 |
| C[C@]12CC[C@H]3[C@@H](CC[C@H]4(                                                   |   |   | 1 |
| Oc1c(cc(c(O)c1[N+](=O)[O-])[N+](=O)[(                                             |   |   | 0 |
| [O-][N+](=O)c1cc(Cl)c(Cl)c(Cl)c1Cl                                                |   |   | 0 |
| CC(=C)C(=O)NCCC[N+](C)(C)C                                                        |   |   | 0 |
| OS(=O)(=O)C                                                                       | 0 |   |   |
| CC(=O)Nc1ccc(Cc2ccc(N)cc2)cc1                                                     |   |   | 0 |
| BrCc1c2ccccc2cc3ccc4ccccc4c13                                                     |   |   | 1 |
| Clc1ccc2c(oc3ccccc23)c1                                                           |   |   | 1 |
| CC\C=C/C\C=C=                                                                     | 0 | 0 | 0 |
| CC(C(=O)O)c1ccc(\C=C\2/CCCCC2=O)cc1                                               |   |   | 0 |
| CC(C)c1ccc(cc1)S(=O)(=O)O                                                         |   |   | 0 |
| [O-][N+](=O)c1cc2ccccc2c3ccccc13                                                  |   |   | 1 |
| COc1ccc(CC(C)NCC(O)c2cc                                                           |   | 0 |   |
| CN(C)c1ccc(cc1)C(=C2C=CC(=N)C=C2)c3                                               |   |   | 0 |
| BrC=C                                                                             |   |   | 1 |
| Nc1ccc(CO)c(c1)[N+](=O)[O-]                                                       |   |   | 1 |
| CCOC(=O)C(=C)C#N                                                                  |   |   | 0 |
| CCC(C)C1CCCCC1=O                                                                  |   |   | 0 |
| CCOP(=O)(C#N)N(C)C                                                                |   |   | 0 |

|                                             |   |   |   |
|---------------------------------------------|---|---|---|
| COc1cc(ccc1Cc2cn(C)c3ccc                    | 0 | 1 | 1 |
| O=C(C(=O)c1ccccc1)c2cccc2                   | 0 |   |   |
| COc1ccc(c2c(NCCCN(C)C)c3ccccc3nc12)         | 1 |   |   |
| COc1ccc(CCC2CO2)cc1                         | 1 |   |   |
| OS(=O)(=O)c1cccc(c1)N(=O)=O                 | 0 |   |   |
| N[C@H]1CCN(O)C1=O                           | 0 |   |   |
| CCCCCCCCC                                   | 0 | 0 |   |
| C(N1CCNCC1)c2cccc2                          |   | 0 |   |
| NC(=O)OCC(COC(=O)N)c1c                      | 0 | 0 |   |
| COc1ccc(cc1)C(=O)ON(OCc2cccc2)C(=O          | 1 |   |   |
| C[C@@H]1CCCCN1CCNCC(=O)Nc2c(C(              | 1 |   |   |
| CC1=C(O)C(=O)CC1                            | 0 |   |   |
| COP(=S)(OC)Oc1cc(Cl)c(Br)cc1Cl              |   | 1 |   |
| NC1CCc2cc(C                                 | 0 | 0 |   |
| Clc1ccc(C=O)cc1                             | 0 |   |   |
| CN(C)c1ccc2c(ccc\C=C\C3cc(C)n(c3C)c4        | 1 |   |   |
| C[C@@H]1C[C@H]2[C@@                         | 0 |   |   |
| COC1[C@@H](CC(=O)O[C@H](C)CC=CC=C[C@H](O)[C | 0 |   |   |
| COc1ccc(cn1)N=Nc2ccc(cc2)N(C)C              | 1 |   |   |
| CCCC\C=C\C=C\C=C\C=C\C=C\C=C\C=C\OC         | 1 |   |   |
| C1CN=C(N1)c                                 | 0 | 0 |   |
| CC(=O)Nc1cccc2Cc3ccccc3c12                  | 1 |   |   |
| COc1ccccc1CC2CO2                            | 1 |   |   |
| CCCNC(C)C(=O)Nc1c(C)csc1C(=O)OC             |   | 0 |   |
| C[C@@H](O                                   | 0 | 0 |   |
| Cc1ccc(cc1)[S+](=O)([O-])                   | 0 |   |   |
| NC1CCN(O)C                                  | 0 | 0 |   |
| CC(C)CCOCC(=O)OCC=C                         | 0 | 0 |   |
| COC1=C(Oc2cccc2C1=O)c                       | 0 |   |   |
| NS(=O)(=O)c                                 | 0 |   |   |
| O=N(=O)c1ccc(OC2CO2)cc1                     | 1 |   |   |
| O=N(=O)c1ccc2c3c1cccc3c4cccc5ccc(c2         | 1 |   |   |
| CCCCNC(=O)NCCCC                             |   | 0 |   |
| C1Cc2ccc3nc4ccc5ccccc5c4cc3c2C=C1           | 1 |   |   |
| COCCC#N                                     |   | 0 |   |
| CC(=O)N[C@@H](CS\C=C(/Cl)\C(=C(Cl)          | 1 |   |   |
| Cc1cc(C)n(CO)n1                             |   | 0 |   |
| COC(=O)c1cccc2Oc3c4C5C=COC5Oc4cc(           | 1 |   |   |
| Nc1ccc(SC#N)cc1N(=O)=O                      |   | 1 |   |
| Cc1nc(N=Nc2                                 | 0 | 0 |   |
| [O-][N+](=O)C1=Cc2c3c1cccc3cc4ccc5cc        | 1 |   |   |
| CC(O)C1CCCC1                                |   | 0 |   |
| CC(C)CC(NC(=                                | 0 | 0 |   |

|                                                     |   |   |   |
|-----------------------------------------------------|---|---|---|
| CC1OC(OCC2OC(OC3=C(Oc                               | 0 | 1 |   |
| CN(C)C(=O)Nc1ccc(Cl)cc1                             |   | 0 | 0 |
| OC(O)C(Cl)(C                                        | 0 | 0 | 1 |
| CCN(Cc1c(F)cccc1Cl)c2c(cc(cc2N(=O)=O)C(F)(F)F)N(=   |   |   | 1 |
| CCC1OC(=O)(                                         | 0 | 0 |   |
| Cc1c(Cl)cccc1N(=O)=O                                |   |   | 0 |
| CC(=O)O[C@]1(CC[C@H]2[C@@H]3CCC                     |   | 0 | 0 |
| CC(C)(C)c1ccc(cc1)[S+](=O                           |   | 0 |   |
| CC(C)(c1ccccc1)c2ccc(Nc3ccc(cc3)C(C)(C)c4ccccc4)cc2 |   |   | 1 |
| CCCCOC(=O)c                                         | 0 | 0 | 0 |
| CC[C@H](C)[                                         | 0 | 0 |   |
| ONc1[nH]cnc2ncnc12                                  |   |   | 1 |
| CO[C@@H]1[C@@H](OC(=O)N)[C@@H](O)[C@H](C            |   |   | 0 |
| OP(=O)(O)O                                          | 0 | 0 |   |
| Cc1cc2[nH]c(C)nc2c3c1ccc4ccc(O)cc34                 |   |   | 1 |
| CN1C(=O)N(c                                         | 0 | 0 |   |
| CCN1CCN(CC1)c2cc(c3CCCCCc3n2)c4ccc(F)cc4            |   |   | 0 |
| SC1CCCC1                                            |   |   | 0 |
| ClC1=CC(=O)C=CC1=O                                  |   | 0 |   |
| S=C(SSC(=S)N1CCCCC1)N2CCCCC2                        |   |   | 0 |
| Clc1ccc(cc1)C(Cl)(Cl)Cl                             |   |   | 1 |
| C[C@H](O)Cr                                         | 0 | 0 |   |
| C1CO1                                               |   |   | 1 |
| CCC1(C)CC(=c                                        | 0 | 0 | 0 |
| CN1C2CCC1C                                          | 0 |   |   |
| Nc1nc(O)c2nc(O)n(C3OC(CO)C(O)C3O)c                  |   |   | 0 |
| Nc1c2C(=O)c3ccccc3C(=O)c2c(Nc4cccc(c                |   |   | 1 |
| CN\C(=C\[N+](=O)[O-])\N                             | 0 | 0 |   |
| CCCCCCCCCCCCCCCC(=O)OCC(O)C1OC(=c                   |   |   | 0 |
| CCOP(=O)(OCC)N1C2C1c3ccccc3c4ccccc                  |   |   | 1 |
| CCc1ccc(cc1)N(=O)=O                                 |   |   | 0 |
| CCN1C=C(C(=                                         | 0 | 0 | 0 |
| CC\C=C/1\OC(=O)c2ccccc12                            |   |   | 0 |
| COCCI                                               |   |   | 0 |
| CCCCCCN(=O)=O                                       |   |   | 0 |
| CCN(CC#N)c1cccc(C)c1                                |   |   | 0 |
| CC[C@@H]1OC(=O)[C@@                                 |   | 1 |   |
| NC1=NC(=O)N(C=C1)[C@H]2CS[C@@H](CO)O2               |   |   | 0 |
| Nc1ccc(N)c2C(=O)c3c(cccc3[N+](=O)[O-                |   |   | 1 |
| COc1cccc(OC)c1C(=O)O                                |   |   | 0 |
| CC(=C)C                                             |   |   | 0 |
| CC(=O)N[S+](=O)([O-])c1c                            |   | 0 |   |
| CC(C)[C@]1(NC(=O)[C@H]                              |   | 0 |   |

|                                               |   |  |   |   |
|-----------------------------------------------|---|--|---|---|
| Cc1ccc(O)cc1O[P@](=O)(Oc2ccc(O)cc2(           | 0 |  |   |   |
| Cc1ncc(N(=O)=O)n1CC(O)CCI                     |   |  | 0 |   |
| CC(C)CC(=O)OC1OC=C(COC(=O)C)C2=CC             | 1 |  |   |   |
| CCN(CC)CCC[C@@H](C)Nc1cc(OC)cc2cc             | 1 |  |   |   |
| C[C@@]12C( 0 1                                |   |  |   |   |
| CC1CCCC(O)CCCCCc2cc(O)cc(O)c2C(=O)(           | 0 |  |   |   |
| COc1ccc2c3ccc4cc5OCOc5cc4c3N(C)C(=            | 1 |  |   |   |
| Nc1c2[nH]cnc2nc[n+] <sup>1</sup> [O-]         | 1 |  |   |   |
| CC1Nc2cc(Cl)c(cc2C(=O)N: 0                    |   |  |   |   |
| Clc1cc(Cl)c(Oc2ccc(cc2)N(=O)=O)c(Cl)c1        | 0 |  |   |   |
| NCCN(CCCl)c1c2cccc2nc3c1ccc4cccc3'            | 1 |  |   |   |
| CCN(CC)c1ccc2C(=C3C=CC(=[N+](CC)CC)           | 1 |  |   |   |
| CCCCON(OC(=O)C)C(=O)c1cccc1                   | 1 |  |   |   |
| Clc1ccc(OCC( 1 0                              |   |  | 0 | 1 |
| COc1cc(CNC( 0 0                               |   |  | 0 |   |
| CCCC[CH-][N+](=O)[O-]                         | 0 |  |   |   |
| CCC1Nc2cc(Cl)c(cc2S(=O)(=O)N1)S(=O)(=O)N      |   |  | 0 |   |
| ClC(Cl)Cl 0 0                                 | 0 |  | 0 |   |
| COCCOc1cc2( 0 1                               |   |  |   | 1 |
| ClCCC(=O)\N=C\1/SN(C(=O)CCCl)c2cccc           | 0 |  |   |   |
| OC(=O)C(F)(F)C(F)(Cl)C(F)(F)C(F)(Cl)C(F       | 0 |  |   |   |
| O=N(=O)c1ccc(c2ccc(c(c2)N(=O)=O)N(=           | 1 |  |   |   |
| Cc1cccc(C)c1NO                                | 1 |  |   |   |
| ONc1ccc(Cl)cc1                                | 0 |  |   |   |
| [O-][S+] <sup>1</sup> (=O)N(CCCCN2C( 0        |   |  |   |   |
| N#CCCSCCC#N                                   |   |  | 0 |   |
| CC1OCCC1=O                                    |   |  | 0 |   |
| CCCCCC(O)\C=C\C=O                             | 0 |  | 0 |   |
| OC(=O)\C=C\ 0 0                               | 0 |  | 0 |   |
| CC(C)(c1ccc(OCC(O)CCL)cc1)c2ccc(OCC(          | 0 |  |   |   |
| O=C1CCCCCCCCCCCCOCCCCO1                       |   |  | 0 |   |
| CNCC[C@@H](Oc1cccc1C 1                        |   |  | 0 | 1 |
| CC1=C(CCC(=O)[O-])C2=CC3=NC(=CC4=NC(=CC5=NC(= | 0 |  |   |   |
| OC(C(F)(F)F)C(F)(F)F                          | 0 |  |   |   |
| CC1(C)OC(=C 0 0                               |   |  | 0 |   |
| NC(=Nc1nc(CSCC\C(=N/S(=O)(=O)N)\N)cs1)N       |   |  | 0 |   |
| CC1=CC2CCCCC2c3cccc13                         | 1 |  |   |   |
| CC1=CC[C@H](CC=O)C1(C)C                       |   |  | 0 |   |
| CC(C)CCOC(=O)C=Cc1cccc1                       |   |  | 0 |   |
| Clc1ccc(c(Cl)c1)N(=O)=O                       | 1 |  | 0 |   |
| CO[C@H]1[C 1 0                                |   |  | 1 |   |
| N[S+](=O)([O-])c1cc(Cl)c( 0                   |   |  |   |   |
| OS(=O)(=O)OCc1ccc2ccc3cccc4ccc1c2c3           | 1 |  |   |   |



|                                            |   |   |   |
|--------------------------------------------|---|---|---|
| Oc1c(Br)cc(cc1Br)C2(OS(=O)(=O)c3cccc       | 0 |   |   |
| Cc1ccc(cc1)[N+]#N                          | 1 |   |   |
| OC(=O)c1cc(Cl)cc(c1Cl)N(=O)=O              |   |   | 0 |
| OC[C@H]1O[C@@H](Oc2c                       | 0 |   |   |
| CC(C)CCCCOC(=O)C=C                         | 0 |   | 0 |
| CC(=O)ON(C(=O)C)c1ccc(cc1)c2cccc2          | 1 |   |   |
| Cc1ccc(cc1)S                               | 0 | 0 | 0 |
| CC\C=C/CC\C=C\CO                           |   |   | 0 |
| F[C@@H](CO[C@@H]1CC[C@H](CC1)Nc2[nH]cnc3nr |   |   | 1 |
| C\C(=C\C(=O)O)\C=C\C1(C                    | 0 |   | 0 |
| CCC12COCN1COC2                             |   |   | 0 |
| NC(=N)NCC1COC2(CCCCC2)O1                   |   |   | 0 |
| CCCCC[C@H](O)\C=C/CCCCCCC(=O)C             | 0 |   |   |
| [O-][N+](=O)c1ccc(cc1)C(=O)\C=C\c2cc       | 1 |   |   |
| Cc1c[nH]cn1                                | 0 |   | 0 |
| CC(=O)Nc1cc                                | 0 | 0 | 0 |
| CC(C)[C@H](CO)Nc1nc(Nc                     | 0 |   |   |
| Oc1cc(cc(c1C                               | 0 | 0 |   |
| CCN(N=O)C(=O)N(C)C                         | 1 |   |   |
| COc1ccc(OC)c(C[C@H](C)N)c1                 |   |   | 0 |
| Cc1cccc2cc3ccc4cccc5ccc(c12)c3c45          | 1 |   |   |
| Cc1c2cccc2c(C)c3c4C=CC(=O)C(=O)c4cc        | 0 |   |   |
| CCCCC(CC)C=O                               | 0 |   | 0 |
| CC(C)(C)C=C                                | 0 | 0 |   |
| C[C@]12CC[C@H]3[C@@H]([C@H](CCCCCCCC(=O)   |   |   | 1 |
| O=N(=O)c1ccc2sc3cccc3c2c1                  | 1 |   |   |
| COc1cccc2c(OC)c3ccoc3nc12                  | 1 |   |   |
| C[N+]1(CC=C                                | 0 | 0 |   |
| FC(F)C(F)C(F)(F)F                          | 0 |   |   |
| CCCS1ccc2nc(NC(=O)OC)[nH]c2c1              |   |   | 1 |
| Clc1ccc(OS(=O)(=O)c2cccc2)c(Cl)c1          |   |   | 1 |
| CC1(C)N(Br)C(=O)N(Cl)C1=O                  |   |   | 0 |
| CC1CCCCN1CCCOC(=O)c2c                      | 0 |   | 0 |
| CC(C)(C)c1ccc(OC[C@H]2CO2)cc1              | 1 |   |   |
| Cc1ccc2cccc2c1N(=O)=O                      | 1 |   | 0 |
| CCOP(=S)(OC                                | 0 | 0 | 0 |
| CN(N=O)C(=O)Oc1ccc(C)c(C)c1C               | 1 |   |   |
| Oc1ccc(cc1O)C2=CC(=O)c3                    | 0 |   |   |
| COc1ccc(N(CCCl)CCCl)c2oc(cc12)[N+](=O      | 1 |   |   |
| CCCCCCCCC=CC1CC(=O)OC1=O                   | 0 |   | 0 |
| CCCC(CCC)C(=O)O                            | 0 | 0 | 0 |
| OC(=O)c1cc(cc(c1)C(=O)O)C(=O)O             |   |   | 0 |
| CCC[C@](C)(COC(=O)N)COC(=O)NC(C)C          | 0 |   |   |

|                                                 |   |   |   |   |
|-------------------------------------------------|---|---|---|---|
| Cc1ccc(cc1N(=O)=O)C(=O)O                        |   |   |   | 0 |
| C[C@@H]1O                                       | 0 | 1 |   |   |
| CC(=O)OCC(=O)[C@@]12OC(C)(C)O[C@@H]1C[C@H]      |   |   |   | 0 |
| CC\C=C\C=C\C=C\C=C\C=C\C=C\SCC(O)CO             |   |   | 0 |   |
| CS(=N)(=O)C                                     | 0 |   |   |   |
| COC(=O)CCc1ccc(OCC(O)CNC(C)C)cc1                |   |   |   | 0 |
| Cc1ccc(cc1)N(N)c2ccc(C)cc2                      |   |   | 1 |   |
| CC(C)NC[C@]                                     | 0 | 0 |   |   |
| CN(C)c1ccc(cc1)N=NS(=O)(=O)[O-]                 |   |   |   | 1 |
| COS(=O)(=O)F                                    |   |   | 1 |   |
| CN1CCN(CCc2ccc(Cl)c(Cl)c                        |   | 1 |   |   |
| COc1cc2CCN(Cc2cc1OC)N=O                         |   |   | 1 |   |
| CCN(CC)Cc1c                                     | 0 | 0 | 0 | 0 |
| CNc1ncnc2[nH]cnc12                              |   |   |   | 1 |
| CN1C(=O)CN=C(c2ccccc2)c3cc(Cl)ccc13             |   |   | 0 | 0 |
| CCN(CC)C(=O)N[C@@H]1(                           |   | 0 |   |   |
| CS\C(=N\OC(=O)N(C)SN(C)C(=O)O\N=C(/C)\SC)\C     |   |   |   | 0 |
| COc1ccc(CCC(=O)c2c(O)cc(O[C@@H]3C               |   |   | 0 | 0 |
| CCCCOC(=O)\C=C\c1oc(cc1)[N+](=O)[O-             |   |   | 1 |   |
| CCCCCCCCP(=O)(O)O                               |   |   |   | 0 |
| CCCC(=O)Nc1snc2cc(Cl)ccc12                      |   |   | 0 |   |
| CC(C)(C)NC(=                                    | 0 |   |   | 0 |
| [O-][N+](=O)c1cc2cccc3c4CCCCc4c5cccc            |   |   | 1 |   |
| CCCC(CC)COC(=O)COc1cc(Cl)c(Cl)cc1Cl             |   |   |   | 0 |
| COc1ccc(cc1OC)C2NC(=S)N3C(NC(=S)N23)c4ccc(OC)c  |   |   |   | 0 |
| Cc1ccc(NC(=O)c2csc(c2)[N+](=O)[O-])cc           |   |   | 1 |   |
| CCC(=O)N1N=CC(=C(Cl)C1=O)Cl                     |   |   | 0 |   |
| CC(C)OC(C)C                                     |   |   |   | 0 |
| OCC(O)C1CO1                                     |   |   | 1 |   |
| CCCCOc1ccc(                                     | 1 | 0 |   | 0 |
| CNc1ccc(cc1)C(=C2C=CC(=NC)C=C2)c3cc             |   |   | 0 |   |
| CC(=O)OCC(=O)[C@@]12N=C(C)O[C@@H]1C[C@H]3       |   |   |   | 0 |
| [O-][N+](=O)c1ccc(cc1)N=Nc2ccccc2               |   |   | 1 |   |
| [O-][N+](=O)C1=Cc2cccc3cccc1c23                 |   |   | 1 |   |
| C[C@]12CC[(                                     | 0 | 0 |   |   |
| CC(C)CC(=O)O[C@@H]1OC=C(COC(=O)(                |   |   | 1 |   |
| CCC(=O)O[C(                                     | 0 | 0 |   |   |
| Fc1ccc(NC(=O)c2cccnc2Oc3cccc(c3)C(F)(F)F)c(F)c1 |   |   |   | 1 |
| CCCCCCC(O)CCCCCCCCC(=O)OC                       |   |   |   | 0 |
| CC(=O)O[C@]1(C(=O)C)C(=C)C[C@H]2[C@@H]3C=C(     |   |   |   | 0 |
| CCCCCCCCC(=                                     | 0 | 0 |   | 0 |
| CC(=O)OC[C@H]1O[C@@H](Oc2cccc3C                 |   |   | 1 |   |
| c1ccc2c(c1)ccc3c2ccc4ccnc34                     |   |   | 1 |   |



|                                              |   |   |   |   |
|----------------------------------------------|---|---|---|---|
| CCN(Cc1ccnc                                  | 0 | 0 |   | 0 |
| CC(=O)Nc1ccc(cc1)c2ccccc2                    |   |   | 1 |   |
| N1C2C1c3c(c4ccccc24)c5ccccc5c6ccccc3         |   |   | 1 |   |
| COc1ccc(cc1)N=Nc2ccc(cc2)N(C)C               |   |   | 1 |   |
| Nc1ncnc2c1ncn2[C@@H]c                        | 0 |   |   | 0 |
| Nc1ccc(cc1N(=O)=O)N(=O)=O                    |   |   | 1 | 1 |
| CC[C@@H](C)c1ccccc1O                         |   |   | 0 |   |
| CC1c2cc(F)ccc2c3ccc(F)cc13                   |   |   | 1 |   |
| CCCCCCCCCCCCCN1CC(C)OC(C)C1                  |   |   | 0 | 0 |
| ClC[C@H](Cl)CBr                              |   |   | 1 |   |
| CCCCCCCCCCCC(=O)C                            |   |   | 0 | 0 |
| C1CC2OC2CC1C3CO3                             |   |   | 1 | 0 |
| COc1ccc(OC)c(c1)N=Nc2c(O)ccc3ccccc2          |   |   | 1 |   |
| CCC(C)(CCC(C)C)C(=O)O                        |   |   |   | 0 |
| OC[C@H]1O                                    | 0 | 0 |   | 0 |
| CCC(=[N+](O)[O-])CO                          |   |   | 0 |   |
| C1COCC2(C1)CO2                               |   |   | 1 |   |
| Nc1ccc(cc1)[N+](=O)[O-]                      |   |   | 1 |   |
| CC(=O)N[C@H]1C(O)O[C@H](CO)[C@@H](O)[C@@H]1O |   |   |   | 0 |
| COc1cc(N)cc(OC)c1N                           |   |   | 0 |   |
| NC(C(O)c1cc                                  | 0 | 0 |   |   |
| Cc1cn2c(c(nc2s1)c3ccc(cc3)[N+](=O)[O-]       |   |   | 1 |   |
| CNc1ccc(cc1N(=O)=O)N(CCO)CCO                 |   |   | 1 |   |
| CC[C@@]12O[C@]1(C(=O)OC)C(=O)O[C@]2          |   |   | 1 |   |
| N1C2C1c3cc4c(cc3c5ccccc25)C6NC6c7cc          |   |   | 1 |   |
| C(N1CCN(CC:                                  | 0 | 1 |   | 0 |
| COc1cc2nc(nc(N)c2cc1OC)                      |   | 0 |   | 0 |
| CC(C)(c1ccc(O)cc1)c2ccc(O)cc2                |   |   | 0 | 1 |
| [O-][N+](=O)c1csc(c1)c2csc(NC=O)n2           |   |   | 1 |   |
| COc1cc2ncnc                                  | 0 | 0 |   |   |
| C[C@@H](CCC=C(C)C)C=C                        |   |   |   | 0 |
| c1ccc2c(c1)cc3sc4cccc5ccc2c3c45              |   |   | 1 |   |
| CCN1C=C(C(=                                  | 0 | 0 | 1 | 0 |
| NC(=O)C1c2c                                  | 0 | 0 |   | 0 |
| CCC(=O)OCC                                   | 0 | 0 |   |   |
| CCN(CC)S(=O                                  | 0 |   |   | 0 |
| OC1(CCCCC1)C(=O)c2ccccc2                     |   |   |   | 0 |
| Nc1cc2c(O)c(N=Nc3ccc(N=Nc4ccc(cc4)S          |   |   | 0 |   |
| CC[C@@H](CO)Nc1nc(NC                         |   | 0 |   |   |
| CCC(C)(CCC(C)C)OC(=O)C                       |   |   |   | 0 |
| Oc1c(Cl)cc(Cl                                | 0 | 0 | 0 | 1 |
| CC1=CC(C)(C)Nc2ccccc12                       |   |   | 0 |   |
| CCC(C)N1C(=O)NC(=C(Br)C1=O)C                 |   |   | 0 | 0 |

|                                               |   |   |   |   |
|-----------------------------------------------|---|---|---|---|
| CCCC(C)C(=O)O                                 |   |   | 0 |   |
| O=NN(c1ccccc1)c2ccccc2                        | 0 |   | 0 |   |
| O=NN1CCC(=O)CC1                               | 1 |   |   |   |
| O=C1[N-]S(=O)(=O)c2ccccc12                    |   |   | 0 |   |
| CNC(=O)Oc1ccccc1OC(C)C                        | 1 |   | 0 |   |
| OC[C@H]1O                                     | 0 | 0 |   |   |
| C\C=C/C=C\C=O                                 | 1 |   |   |   |
| OC[C@@H]1                                     | 0 | 0 |   |   |
| Nc1cc(ccc1c2ccc(cc2)[N+](=O)[O-])[N+]         | 1 |   |   |   |
| COc1ccc2C=C3N(Cc4cc5C                         | 1 |   |   |   |
| Cc1ccc(cc1)C(C)(C)C                           | 0 |   | 0 |   |
| CCCCOc1ccc(cn1)N=Nc2ccc(cc2)N(CC)C            | 1 |   |   |   |
| CN\C(=N\C#I                                   | 0 | 0 |   |   |
| Fc1ccc(cc1)C                                  | 1 | 1 |   |   |
| CNCCS(=O)(=O)[O-]                             |   |   | 0 |   |
| Cc1ccc2nc3ccccc3c(N)c2c1                      | 1 |   |   |   |
| ClCCSCc1ccccc1                                | 1 |   |   |   |
| [O-][N+](=O)c1ccc2N(S\C(=N/C(=O)c3c           | 1 |   |   |   |
| Cc1ccc(N=Nc2c(O)ccc3ccccc23)c(c1)[N+          | 1 |   |   |   |
| Cn1cc2ccc(cc2n1)N(=O)=O                       | 1 |   |   |   |
| CCC(=O)Nc1snc2ccc(C)cc12                      | 0 |   |   |   |
| Oc1ccc(\C=C\C(=O)c2cccs;                      | 0 |   |   |   |
| CC(=C)C(=O)OCC[N+](C)(C)C                     |   |   | 0 |   |
| Oc1c(Cl)cc(Cl)cc1NC(=O)c2c(O)c(Cl)cc(C        | 0 |   |   |   |
| NC(=O)OC[C]                                   | 0 | 0 |   |   |
| CCCC(C)COCC1CO1                               | 1 |   | 0 |   |
| COc1ccc(Cc2                                   | 0 | 0 | 0 | 1 |
| CCC(=O)c1cc                                   | 1 | 1 |   |   |
| O=N(=O)c1cc2CCc3ccccc4ccc(c1)c2c34            | 1 |   |   |   |
| CCCCCCCCCCCCOC(=O)c1cc(O)c(O)c(O)c1           |   |   | 1 |   |
| CN1CCN(CC1)c2cc3N(C4CC4)C5=CC(=O)             | 1 |   |   |   |
| CCCCON=O                                      | 1 |   | 0 |   |
| CS(=O)(=O)Nc1cc2OC=C(NC=O)C(=O)c2cc1Oc3ccccc3 |   |   | 0 |   |
| CC(C)C[P+](C)(CC(C)C)CC(C)C                   |   |   | 0 |   |
| CCCCCCCCO                                     |   |   | 0 |   |
| COc1cccc2c1cc3NC(=O)c4cc5OCOc5c2c:            | 1 |   |   |   |
| CC(C)C1C(=C(C(O)C2=C1C(                       | 0 |   |   |   |
| COc1cccc(C=O)c1                               |   |   | 0 |   |
| ClCC1(C(Cl)Cl)C2C(Cl)C(Cl)C1(C(Cl)Cl)C(C      | 0 |   |   |   |
| CC[C@]12CC                                    | 1 | 0 |   |   |
| Cn1cc(O)nc1                                   | 0 | 0 |   |   |
| CNC(=O)CSP(=O)(OC)OC                          |   |   | 0 |   |
| Oc1ccc(\C=C,                                  | 0 | 0 |   |   |

|                                              |   |   |   |
|----------------------------------------------|---|---|---|
| C[C@H]1[C@H]2CC[C@H]:                        | 1 |   | 0 |
| COC(=O)c1oc(NO)c(c2cccc2)c1c3cccc:           |   | 0 |   |
| CCCCCn1cc2CC3C(C=C(C)CN3C)c4cccc1c:          |   | 1 |   |
| Cc1cccc(C)c1N=Nc2c(O)ccc3cccc23              |   | 0 |   |
| O=C1c2ccc3nc(sc3c2C(=O)c4ccc5nc(sc5          |   | 0 |   |
| CN(CC(=O)NN)c1ccc2cccc2c1                    |   | 0 |   |
| CCC(=O)C(CC(C)N(C)C)(c1cccc1)c2cccc2         |   |   | 0 |
| COc1c(OCC(O)C(C)(C)O)cc                      |   | 0 |   |
| c1ccc2c(c1)ccc3c2ccc4c5ccccc5ccc34           |   | 1 |   |
| Cc1cn2c(c(nc2s1)c3ccc(cc3)N(=O)=O)N(         |   | 1 |   |
| CN1CCc2cc3OCOc3cc2[C@                        |   | 0 |   |
| CCCCOc1ccc2nc3cc(Cl)ccc3c(NCCCN(CC)          |   | 1 |   |
| CCN(CC)CCSC                                  | 1 | 0 |   |
| Clc1ccc(cn1)C2=CCCC3CCC:                     |   | 0 |   |
| CC(C)c1cc(cc(C(C)C)c1N)c2cccc2               |   | 0 |   |
| CCCCCCCCC                                    | 0 | 0 | 0 |
| O=C1C(=O)c2cc3cccc3c4ccc5cccc1c5c2           |   | 1 |   |
| C[n+]1ccn(C)c1                               |   |   | 0 |
| Fc1cccc(F)c1C(=O)NC(=O)Nc2cc(Cl)c(F)c(Cl)c2F |   |   | 0 |
| CC1(C)S[C@@H]2[C@H](NC(=O)Cc3cccc3)C(=O)N2[  |   |   | 0 |
| BrC(Br)C#N                                   |   | 1 | 0 |
| C1OC1c2cc3c4cccc4ccc3c5cccc25                |   | 1 |   |
| CC(=O)SCc1occc1                              |   |   | 0 |
| CC1OC1C                                      |   | 1 |   |
| CO[C@H]1\C                                   | 0 | 0 |   |
| CC(C)(C)Cl                                   |   |   | 0 |
| Oc1cc2C(=O)                                  | 0 | 0 | 0 |
| Oc1ccccc1F                                   |   |   | 0 |
| OC(Cn1ccnc1)c2ccc(CCc3cccc3)cc2              |   | 0 |   |
| CC(COC(C)(C)C)OCCCO                          |   |   | 0 |
| CC(C)CCCC(C)                                 | 0 | 0 | 0 |
| Nc1ccc(cc1)N=Nc2ccc(N)cc2                    |   | 1 | 1 |
| CC(C)(C)C(O)\C(=C/c1ccc(Cl)cc1Cl)\n2cncn2    |   |   | 1 |
| CC(C)CCC[C@                                  | 0 | 0 | 0 |
| OC(=O)CNC(=O)c1ccc(cc1)N(=O)=O               |   | 1 | 0 |
| CN=C=S                                       |   |   | 0 |
| N#CCCC#N                                     |   | 0 | 0 |
| CCCC(CC)COC(=O)Cl                            |   |   | 0 |
| Oc1cccc2C(=O)C=CC(=O)c12                     |   | 1 |   |
| CC1C(=O)N(C                                  | 0 | 0 |   |
| CCc1cnccn1                                   |   | 0 |   |
| OC1C(O)c2ccc3c(ccc[n+]3[O-])c2C4OC1.         |   | 0 |   |
| OC(=NN=Cc1oc(cc1)N(=O)=O)c2ccc(O)c           |   | 1 |   |

|                                                |   |   |   |
|------------------------------------------------|---|---|---|
| OC(=O)Cc1c(Cl)ccc(Cl)c1Cl                      |   |   | 0 |
| Cc1onc(n1)c2ccc3CCN(CCC4CCC(CC4)NC(=O)\C=C\c5c |   |   | 0 |
| CN(N=O)c1ccc(cc1)N(=O)=O                       |   |   | 0 |
| C[n+]1c2ccccc2cc3c(N)cccc13                    | 1 |   |   |
| C[CH-][N+](=O)[O-]                             | 0 |   |   |
| Oc1ccnc2ccccc12                                | 0 |   |   |
| C1CCC2C(C1)C=Cc3ccccc23                        | 1 |   |   |
| Cc1ccc(S)cc1                                   |   |   | 0 |
| [O-][N+](=O)c1ccc(Cl)c(Cl)c1Cl                 | 1 |   |   |
| Oc1cc(O)c(C(=O)Cc2ccc(Cl                       | 0 |   |   |
| COC1(COc2c                                     | 0 | 0 |   |
| COc1cc(OC)c(\C=C\C)cc1OC                       | 1 |   |   |
| ICc1ccc(Oc2ccccc2)cc1                          | 1 |   |   |
| [O-][N+](=O)OCC(CO[N+](=O)[O-])O[N-            | 1 |   |   |
| C(Cc1ccc(cc1)c2ccccc2)[C@H]3CO3                | 1 |   |   |
| CCC(C)(C)C(=O)O                                |   |   | 0 |
| NC(=S)c1ccc[n+](c1)[C@@                        | 0 |   |   |
| C1C[C@@H]2O[C@@H]2C[C@@H]1[C(                  | 1 |   |   |
| CO[C@@]1(I                                     | 1 | 0 |   |
| CCCCN=C(O)C=Cc1oc(cc1)N(=O)=O                  | 1 |   |   |
| C[C@]12CC[C@H]3[C@@H](CCC4=CC(=O)CC[C@H]34     |   |   | 0 |
| CCcn1cc[n+](C)c1                               |   |   | 0 |
| CCCC[C@@H](CC)COC(=O)\C=C\c1ccc(C              | 0 |   |   |
| O=NN1CCCCC1                                    | 1 |   | 0 |
| NS(=O)(=O)c                                    | 0 |   | 0 |
| CC1(C)C(C=C(Br)Br)C1C(=O)OC(C#N)c2c            | 0 |   |   |
| CCCC\C=C\C=C\C=C\C=C\C=C\C=COCC(O)CC           | 1 |   |   |
| Fc1ccc(cc1)C                                   | 1 | 0 |   |
| CC(C)C(NC(=                                    | 0 | 0 |   |
| Cc1cc(O)c2C(                                   | 1 | 0 |   |
| CC(C)N(N)C(C)C                                 | 1 |   |   |
| Clc1ccc(Cl)c(c1)c2oc(\C=C(                     | 0 |   |   |
| CC[C@@]1(C                                     | 0 | 0 |   |
| C[C@]12CC[C@H]3[C@@H](CCC4=CC(=O)CC[C@]34C     |   |   | 0 |
| N[S+](=O)([O-])c1cc2c(cc1                      | 0 |   |   |
| O=Nc1[nH]cnc1c2ccccc2                          | 1 |   |   |
| [O-][N+](=O)c1cc(cs1)C(=O)Nc2ccc(Br)c          | 1 |   |   |
| O=C(\C=C\c1ccccc1)c2ccc(cc2)c3ccccc3           | 0 |   |   |
| NC(=S)N\N=                                     | 0 | 0 |   |
| N[C@@H](CSSC[C@H](N)C(=O)O)C(=O)O              |   |   | 0 |
| CC1=C(O)C(=O)C=CO1                             | 1 |   | 0 |
| Nc1ccc(N)c(c1)N(=O)=O                          | 1 |   | 1 |
| NC(=O)CN1C                                     | 0 | 0 |   |



|                                              |   |   |   |
|----------------------------------------------|---|---|---|
| NCC[C@H](C                                   | 0 | 0 |   |
| CC[N+](CC)(CC)CCOC(=O)C(C1CCCC1)C2CCCC2      |   |   | 0 |
| CC(C)(C)NC(=O)SCC(NC(=O)CCC(N)C(=O           | 0 |   |   |
| N[C@H]1CN(CC12CC2)c3c(F)cc4C(=O)C(=CN(C5C[C@ | 0 |   |   |
| ONC(=O)CNC(=O)c1ccccc1                       | 1 |   |   |
| CC(C)c1cccc(C(C)C)c1N                        |   |   | 0 |
| OC(=O)C1CSC(N1C(=O)CCSSCCC(=O)N2(            | 0 |   |   |
| COc1ccc(cc1OC)c2nc(c3ccccc3)c([nH]2)c        | 1 |   |   |
| N[C@H](CN1C=CC(=O)C(=                        | 0 |   |   |
| COC(=O)C=C(C)CCC=C(C)C                       |   |   | 0 |
| FC(F)(F)c1cccc(c1)N=C=O                      |   |   | 1 |
| NC(=N)c1ccc                                  | 0 |   |   |
| NNc1nnc(NN                                   | 0 | 0 | 1 |
| CC1CC23CCC4C(C)(CCCC4(C)C(=O)O)C2C           |   |   | 0 |
| [O-][N+](=O)c1ccc(Cl)c(Cl)c1                 | 1 |   |   |
| CC(C)c1c(N)ccc2c1Cc3ccccc23                  | 1 |   |   |
| OC(Cc1cnc2ccccc12)(P(=O)(O)O)P(=O)(O)O       |   |   | 0 |
| [O-][N+](=O)c1oc2ccc3cc(ccc3c2c1)N(C         | 1 |   |   |
| O=C(Nc1ccccc1)Nc2ccccc2                      | 0 |   | 1 |
| Oc1c(cc(cc1N(=O)=O)c2ccccc2)N(=O)=C          | 1 |   |   |
| Cc1ccc(cc1C)S(=O)(=O)O                       | 0 |   |   |
| CC(C)CCCC(C)C1CCC2C3C(OO)C=C4CC(O)           | 1 |   |   |
| Cn1c(ncc1[N+](=O)[O-])[C@H]2NC(CO)           | 1 |   |   |
| CCCCN(CCO)N=O                                | 1 |   |   |
| NNC(=O)OCc1ccccc1                            |   |   | 0 |
| Cc1cc(O)c2cc                                 | 0 | 0 | 0 |
| CC\C=C/C\C=C=                                | 0 | 0 | 0 |
| O=C(C=Cc1ccccc1N(=O)=O)c2ccccc2              | 0 |   |   |
| COc1ccc(O)c2C(=O)c3c(OC)cc4OC5OC(=           | 1 |   |   |
| OC(CN=N#N)Cn1cnc2c(Cl)ncnc12                 | 1 |   |   |
| NC1(CCCC1)C(=O)O                             | 0 |   |   |
| CC(C)(C)c1on                                 | 0 | 0 |   |
| CCN(CC)CCN:                                  | 1 | 1 | 0 |
| Oc1cc(Cl)c(Cl)c(Cl)c1Cl                      | 0 |   | 1 |
| CCCCCCCCC=CC#N                               |   |   | 0 |
| c1ccc2c(c1)cc3ccc4cccc5ccc2c3c45             | 1 |   |   |
| OCC1OC(CC1O)n2cnc3c2ncn4ccnc34               | 0 |   |   |
| [O-][N+](=O)c1ccc2C(=O)NC(=O)c2c1            | 1 |   |   |
| CC(C)NCC1CCc2cc(CO)c(cc2N1)[N+](=O)          | 1 |   |   |
| CC12CCC=C(C=O)C1(C2)C=O                      | 1 |   |   |
| CN(C)CCNC(=O)c1ccc2c(N)c3ccccc3nc2c          | 0 |   |   |
| Nc1ccc(cc1Cl)c2ccc(N)c(Cl)c2                 | 1 |   |   |
| O=C(C1OC1c2ccccc2)c3ccc(cc3)N(=O)=C          | 1 |   |   |

|                                               |   |   |   |
|-----------------------------------------------|---|---|---|
| COc1c(C)c2C                                   | 0 | 0 |   |
| C[C@@]12C                                     | 0 | 0 |   |
| CCC(C)C(C(=O)OCC[N+](C)(CC)CC)c1cccc1         |   |   | 0 |
| CCCCCCCCCCC(=O)OCC                            |   |   | 0 |
| Cc1ccc(C=O)cc1                                |   |   | 0 |
| Nc1ncnc2c1c(cn2C3CCCC3                        |   | 1 |   |
| ClC(Cl)(Cl)SN1C(=O)C2CC=                      | 0 |   | 1 |
| OC1C(O)C(OC1COP(=O)(O)O)N2C=CC(=              |   | 0 |   |
| CC(Cc1cccc1                                   | 0 | 0 |   |
| Cc1c(N)cccc1N=Nc2cccc(N)c2C                   |   |   | 1 |
| O=NN1CCCN(CC1)N=O                             |   |   | 1 |
| NS(=O)(=O)c1cc2c(NC(NS2(=O)=O)C(Cl)Cl)cc1Cl   |   |   | 0 |
| COc1cc(C=CC(=O)N2CCN(CC(=O)N3CCCC3)CC2)cc(OC) |   |   | 0 |
| CCOC(=O)N1                                    | 0 | 0 | 0 |
| Nc1ccc(cc1)[S+](=O)([O-])                     |   | 0 |   |
| CC(=O)c1cccc(c1)N(=O)=O                       |   |   | 1 |
| CC(=O)CC(C1=C(O)c2cccc2OC1=O)c3ccc(cc3)N(=O)= |   |   | 1 |
| CCCC[C@H](                                    | 0 | 0 |   |
| FC(F)(F)c1cccc(c1)N2CC(CCl)C(Cl)C2=O          |   |   | 0 |
| ClC(=CC=O)Cl                                  |   |   | 1 |
| Clc1cc(Cl)c(Oc2ccc(NC=O)cc2)c(Cl)c1           |   |   | 1 |
| CCN(CC)CCCC(C)Nc1ccnc2cc(Cl)ccc12             |   |   | 1 |
| N[C@H]1CSS                                    | 0 | 0 | 0 |
| CCN1C=C(C=                                    | 0 | 0 | 1 |
| O[C@@H]1[C@@H]2O[C@@H]2c3c(cc                 |   |   | 1 |
| CCN1C[C@]2(COC)[C@H](O)C[C@H](OC)[C@@]34[C    |   |   | 0 |
| CSC(C)(C)C=NOC(=NC)O                          |   |   | 0 |
| Cc1c2cccc2c3ccc4cccc5ccc1c3c45                |   |   | 1 |
| Clc1ccc(CS[C@@H](Cn2cc                        |   | 0 |   |
| CCCC1=CC(=O)NC(=S)N1                          |   |   | 0 |
| CC(N)CN                                       |   |   | 0 |
| COc1ccc(\C=N/NC(=O)c2ccncc2)c(C(=O)O)c1OC     |   |   | 0 |
| CCC(=N(=O)O)Cl                                |   |   | 1 |
| COC(=O)Nc1nc2cc(OS(=O)(=O)c3ccc(F)c           |   |   | 0 |
| OC[C@H]1O[C@H]([C@H](O)[C@@H]1                |   |   | 1 |
| Cc1ccc(cc1)S(=O)(=O)N2N=CC(=C(Cl)C2           |   |   | 0 |
| C[C@@H]1C                                     |   | 0 |   |
| OCCC(F)(F)C(F)(F)C(F)(F)C(F)(F)C(F)(F)F       |   |   | 0 |
| CCCCON(OC(=O)C)C(=O)c1ccc(cc1)C(C)(           |   |   | 1 |
| CC(C)Nc1ccnc1N2CCN(CC                         |   | 0 |   |
| CC[C@]12CCCN3CCc4c([C@                        |   | 0 |   |
| COC(=O)C(CSCC(C)Br)NC(=O)C                    |   |   | 1 |
| [O-][N+](=O)c1ccc2C(=O)N(CCl)C(=O)c2          |   |   | 1 |

|                                                    |   |   |   |
|----------------------------------------------------|---|---|---|
| CC(CCO)CC(C)(C)C                                   |   |   | 0 |
| O=C1CCCC2[C@@H]3CCCN                               | 0 |   |   |
| CNC(=O)O\N=C(/SC)\C(=O)N(C)C                       |   |   | 0 |
| COC(C)(C)OC                                        |   |   | 0 |
| CCC1(C(=O)N                                        | 0 | 0 | 0 |
| CCCCC(=O)O                                         | 0 | 0 |   |
| Cc1c(onc1C2CCN(CCc3cccc                            |   | 1 |   |
| Nc1ccc(\C=C\c2ccc(N)cc2)cc1                        |   |   | 1 |
| C\C(=C/COC1=CC(=O)Nc2c                             |   | 0 |   |
| Cc1ccc(cc1[N+](=O)[O-])N=[N+](O-)]c2               |   |   | 0 |
| COC(=O)\C=C\C(=C/C=C/C(=C/C=C/C=C(                 |   | 1 |   |
| CCCOC(OCCC)OCCC                                    |   |   | 0 |
| [O-][N+](=O)c1ccc(cc1)C(=O)ON(OCc2c                |   | 1 |   |
| CC1(C)C(C=C(Cl)Cl)C1C(=O)OC(C#N)c2cc               |   | 0 | 0 |
| Cc1c2cccc2c(C)c3c1ccc4cccc34                       |   | 1 |   |
| Cc1ncc(CSSC                                        | 0 | 0 | 0 |
| C[C@H](Cn1c                                        | 0 | 0 |   |
| CC(C)(Oc1ccc(cc1)C(=O)c2ccc(Cl)cc2)C(=             |   |   | 0 |
| CO[C@@]1(I                                         | 0 | 0 |   |
| [O-][N+](=O)c1cccc(Cl)c1Cl                         |   |   | 0 |
| CC1=CC(=O)Oc2ccc3OC4(C)OOC4(C)c3c:                 |   | 1 |   |
| c1ccc2nc3c(cc2c1)c4cccc5cccc3c45                   |   |   | 0 |
| CCCC=N(=O)O                                        |   |   | 0 |
| CS(=O)(=O)N                                        | 0 |   |   |
| [O-][N+](=O)c1ccc2ccc3c4CCC=Cc4cc5c                |   | 1 |   |
| Cc1c(N)cc(N)cc1[N+](=O)[O-]                        |   | 1 |   |
| C[C@H](CC[C                                        | 0 | 0 | 1 |
| COc1cc2CCN(C)c3cc4cc5OCOc5cc4c(c1C                 |   | 1 |   |
| Cc1cccc(Cc2c[nH]cn2)c1C                            |   |   | 0 |
| OC(=O)c1cccc1N(=O)=O                               |   | 1 | 0 |
| Cc1ccc(Br)cc1                                      |   | 0 | 0 |
| OCCSN=O                                            |   | 1 |   |
| CC1(C)C(=C)[C@]2(Cl)C(Cl)[C@@]1(Cl)C(Cl)(Cl)C2(Cl) |   |   | 1 |
| OC[C@H]1O[C@H](O[C@]2(CO)O[C@H](CO)[C@@H           |   |   | 0 |
| OC[C@H]1O[C@H](O[C@@]2(CO)O[C@@H](O)[C@            |   |   | 0 |
| N[C@H](C(=O)O)c1ccc(O)                             |   | 0 |   |
| CN(C)C(=S)N(C)C                                    |   |   | 0 |
| Cc1ccc(Cl)cc1                                      |   |   | 0 |
| CC(C)CCC[C@@H](C)[C@@H]1CC[C@@                     |   | 1 |   |
| Nc1oc2ccc(Cl                                       | 0 | 0 | 0 |
| CC(O)Cc1cc(N)cc(c1N)[N+](=O)[O-]                   |   |   | 0 |
| OC(=Nc1cccc1N(=O)=O)c2csc(c2)N(=O                  |   | 1 |   |
| CCCCCCCCC(=O)C                                     |   |   | 0 |



|                                                  |   |  |   |
|--------------------------------------------------|---|--|---|
| CC(CCC1CCCC1)c2CCCC2                             | 0 |  |   |
| CCCCCCCCCCCCCOS(=O)(=O)[O-]                      |   |  | 0 |
| CCOC(=O)c1c2c(nn[n+] <sup>1</sup> [O-])c3CCCC3n2 | 1 |  |   |
| CCCCOC(=O)C(C)CC                                 |   |  | 0 |
| ClCCOP(=O)(OCCCl)OCCCl                           | 0 |  | 0 |
| CC(C)(C)[C@] <sup>1</sup> (O)C[C@@] <sup>1</sup> | 0 |  |   |
| OC(CCN1CCC                                       | 1 |  | 0 |
| CC(C)(C)CN=C(O)C=Cc1oc(cc1)N(=O)=O               | 1 |  |   |
| CCOC(=O)N(CCO)N=O                                | 1 |  |   |
| Clc1CCCC(Cl)c1                                   | 0 |  | 0 |
| BrCC(=O)OCc1CCCC1                                |   |  | 0 |
| Fc1ccc2c3ccc4CCCC4c3c5CCCC1c25                   | 1 |  |   |
| O=C(C1CCCC1)N2C[C@H]3N(CCC4CCCC                  | 0 |  |   |
| [O-][N+](=O)c1cc2c3CCCC3ccc2c4CCCC:              | 1 |  |   |
| COc1ccc2Oc3cc(OC)cc(OC)c3C(=O)c2c1               | 1 |  |   |
| ClC1CCCC1=O                                      |   |  | 0 |
| COc1ccc(\C=                                      | 0 |  | 0 |
| C#CCN[C@@                                        | 0 |  | 0 |
| CN1[C@@H]2CC[C@@H]1                              | 0 |  |   |
| O=C1C=Cc2c(ccc3c2ccc4CCCC34)C1=O                 | 0 |  |   |
| CN(C)CCCNc1c2CCCC2nc3c(Cl)ccc(c13)[I             | 1 |  |   |
| CC(CCOc=O)CCC=C(C)C                              |   |  | 0 |
| CC(=O)N(Nc1ccc2c(Cc3CCCC23)c1)c4ccc              | 1 |  |   |
| CC(C)OC(=O)c1CCCC1C(=O)OC(C)C                    |   |  | 0 |
| OC(=O)C1CSN1C(=O)C2CCC(=O)N2                     | 0 |  |   |
| CC1CC2(C)C(CCC3C4CCC(O)C4(C)CCC23)(              | 0 |  |   |
| NC1(CCC2cc(                                      | 0 |  |   |
| COc1ccc(OC)                                      | 0 |  | 0 |
| CCC\C=N/O                                        | 1 |  | 0 |
| COc1ccc(\C=C\c2cc(OC)cc(                         | 0 |  |   |
| COc1ccc(cc1)[N+](=O)[O-]                         | 1 |  |   |
| CCN1C=C(C(=                                      | 0 |  | 0 |
| CCCCN(CCO)CCO                                    |   |  | 0 |
| NCCc1ccc(O)                                      | 0 |  | 0 |
| O=C1NCNC(=O)N1                                   | 1 |  |   |
| Oc1ccc(Cc2CCCC2)cc1                              |   |  | 1 |
| NC(=O)N(CC(=O)O)N=O                              | 0 |  |   |
| COC(C)(C)CC(=O)C                                 | 0 |  | 0 |
| Oc1ccc(cc1[N+](=O)[O-])c2CCCC(c2O)[N             | 0 |  |   |
| Clc1ccc(cc1)C(=O)c2ccc(Cl)cc2                    |   |  | 0 |
| OC1=C(Oc2cc                                      | 0 |  | 0 |
| OC(=O)c1ccc(cc1)N(=O)=O                          | 1 |  | 0 |
| CC(C)(C)C(=O)CCc1ccc(Cl)cc1                      |   |  | 0 |

|                                                                  |   |   |   |
|------------------------------------------------------------------|---|---|---|
| <chem>Cc1ccc(cc1)S(=O)(=O)N</chem>                               |   |   | 0 |
| <chem>Cc1cccc(NS(=O)(=O)c2cccc3cccnc23)c1</chem>                 | 0 |   |   |
| <chem>CC1=NN(C(=O)C1)c2cccc(c2)S(=O)(=O)O</chem>                 |   |   | 0 |
| <chem>OCC(NC(=O)C)C</chem>                                       | 0 | 0 | 0 |
| <chem>CC1CCC(CC1)C</chem>                                        | 0 | 0 | 1 |
| <chem>C[C@@H]1O[C@@H](O[C@H]2C[C@H](O)C[C@@H]2)[C@H](O)C1</chem> | 1 |   |   |
| <chem>CC1=CC[C@H]2[C@H](C1)[C@H](CC=C2)C</chem>                  | 0 |   |   |
| <chem>CC1SCC(NC1=O)C(=O)NC(Cc2c[nH]cn2)C</chem>                  | 0 |   |   |
| <chem>O=C1c2cccc3ccc4c5ccccc5cc1c4c23</chem>                     | 1 |   |   |
| <chem>CCC12CCC3C(CCC4=CC(=O)CCC34)C1CCC</chem>                   | 0 |   |   |
| <chem>C[N@+]1([O-])CCC[C@@H]1c2cccnc2</chem>                     | 0 |   |   |
| <chem>CN(N=O)c1cccnc1</chem>                                     | 0 |   |   |
| <chem>CC(C)CCC[C@H]1C</chem>                                     | 0 | 0 | 0 |
| <chem>CC(C)OC=O</chem>                                           |   |   | 0 |
| <chem>CC(=O)OCCCC1CCCCC1</chem>                                  |   |   | 0 |
| <chem>C[N+](=NC[C@H]1O[C@@H](CO)[C@H](O)C1)[O-]</chem>           | 0 |   |   |
| <chem>[O-][N+](=O)c1cc2c3cccc3c4cccc(c1)c2</chem>                | 1 |   |   |
| <chem>Cc1ccc2nc3c(ccc4cccc34)c(C)c2c1</chem>                     | 1 |   |   |
| <chem>CC(C)C(=O)O</chem>                                         | 1 | 0 |   |
| <chem>Fc1ccc(cc1)C(=O)C2OC2c3cccc3</chem>                        | 1 |   |   |
| <chem>C[C@H]1[C@H](O)C</chem>                                    | 0 | 0 |   |
| <chem>CC(=C)C=C</chem>                                           | 0 |   | 0 |
| <chem>S=C1SC=C(S1)c2cccc2</chem>                                 | 0 |   |   |
| <chem>C1CCC2C(C1)C3OC3c4cccc24</chem>                            | 0 |   |   |
| <chem>NC(=O)C[S+](O)C1CCC1</chem>                                | 0 |   |   |
| <chem>CNC1CC(OC2CC(O)(Cc3c(O)c4C(=O)c5ccc</chem>                 | 1 |   |   |
| <chem>C[C@]12CC[C@@H]1C</chem>                                   | 0 |   | 1 |
| <chem>COc1cccc(c1)[N+](=O)[O-]</chem>                            | 0 |   |   |
| <chem>Clc1ccc2Oc3cc(Cl)ccc3Oc2c1</chem>                          | 0 |   |   |
| <chem>COc1cccc1NCSC</chem>                                       | 1 |   |   |
| <chem>CCCN(CCC)CC</chem>                                         | 1 | 0 | 0 |
| <chem>CN(CCN1CCCCC1)CCc2ccc</chem>                               |   | 1 |   |
| <chem>CC[n+](O)C</chem>                                          |   |   | 0 |
| <chem>CC(C)[C@@]12C[C@@H]1[C@H](C)C(=O)C1</chem>                 | 0 |   |   |
| <chem>ClC1C(=O)NC(=O)C1=C(Cl)Cl</chem>                           | 1 |   |   |
| <chem>COC(=O)c1cc(cc(c1)S(=O)(=O)[O-])C(=O)OC</chem>             |   |   | 0 |
| <chem>CCSCC</chem>                                               |   |   | 0 |
| <chem>N[C@H](C(=O)C)C</chem>                                     | 0 | 0 |   |
| <chem>CCCC[C@H]1C</chem>                                         | 0 | 0 | 0 |
| <chem>[O-][N+](=O)c1ccc2c3ccc(cc3C(=O)c2c1</chem>                | 1 |   |   |
| <chem>CCC12OC1(C(=O)OC)C(=O)OC2C</chem>                          | 1 |   |   |
| <chem>COc1cc2c(Cc3c4N(C)CCc5c</chem>                             |   | 0 |   |
| <chem>CC1(C)[C@H]2CC[C@]1(C)[C@H](O)C2</chem>                    |   |   | 0 |

|                                                 |   |   |   |
|-------------------------------------------------|---|---|---|
| CN(C)C(=O)C=Cc1oc(cc1)N(=O)=O                   | 1 |   |   |
| O=N(=O)c1ccc(Sc2ccccc2)cc1                      | 1 |   |   |
| OCc1cccc(c1)N(=O)=O                             | 0 |   |   |
| OCCN1CN(CCO)CN(CCO)C1                           | 1 |   |   |
| CC(C)C1NC(=O)C(NC(=O)C                          | 0 |   |   |
| COC(=O)[C@]12O[C@@]1(C)[C@@](O                  | 1 |   |   |
| CCCCOC(=O)CC(CC(=O)OCCCC)(OC(=O)C               | 0 |   | 0 |
| COP(=O)(OC)Oc1c(Cl)cc(C)cc1Cl                   | 0 |   |   |
| CCC1(O)CC(OC2CC(C(OC3CC(O)C(O)C(C)              | 1 |   |   |
| NC(CCCCCP(=                                     | 0 | 0 |   |
| CC(C)COC(=O)c1ccccc1N                           | 0 |   |   |
| CC(CC=O)c1ccc(cc1)C(C)(C)C                      | 0 |   |   |
| Clc1ccc2N(C                                     | 0 | 0 | 1 |
| COc1ccccc1OCC(O)COC(=O)N                        |   |   | 0 |
| Fc1ccc(cc1)C                                    | 1 | 1 |   |
| CCC(C)(C)C1CCC(O)CC1                            |   |   | 0 |
| CNN                                             | 1 |   |   |
| OCC(O)CN=[N+]=[N-]                              | 1 |   |   |
| OCC(Br)(CO)                                     | 0 | 0 | 0 |
| c1cc2ccc3ccnc4ccc(c1)c2c34                      | 1 |   |   |
| CN[C@@H]1[C@@H](O)[C@@H](O[C@H]2[C@H](N         |   |   | 0 |
| OC(=O)CC#N                                      |   |   | 0 |
| NC(CCC(=O)NC(CSC(=O)NCCCCI)C(=O)N               | 1 |   |   |
| COc1cc(NS(=O)(=O)C)ccc1Nc2c3ccccc3r             | 1 |   |   |
| OC1C=Cc2c(ccc3c(c4ccccc4cc23)[N+](=C            | 1 |   |   |
| COc1nncc2ccccc12                                | 0 |   |   |
| Nc1ccc2C(=O)c3ccccc3C(=O)c2c1                   | 1 |   | 1 |
| CCCC(C)CC                                       | 0 | 0 | 0 |
| NCCC(O)(P(=                                     | 0 | 0 | 0 |
| [O-][N+](=O)c1cc(Cl)c(Cl)c(Cl)c1                | 1 |   |   |
| CCCC(C)C(=O)O                                   | 0 |   | 0 |
| COC(=O)C1=C(C)NC(=C(C1c2cccc(c2)N(=O)=O)C(=O)C  |   |   | 1 |
| CCN1C=C(C(=                                     | 0 | 0 |   |
| CCOP(=O)(OCC)SCCSCC                             |   |   | 0 |
| COc1ccc(cc1)                                    | 0 | 0 | 0 |
| OC[C@H]1NC[C@H](O)[C                            |   | 0 |   |
| C1O[C@@H]1c2cc3ccccc3c4ccccc24                  | 1 |   |   |
| Oc1ccc(c(Cl)c1)c2ccccc2                         |   |   | 1 |
| CN(C)Cc1cc(CN(C)C)c(O)c(CN(C)C)c1               |   |   | 0 |
| CC(=O)C=Cc1occc1                                |   |   | 0 |
| N[C@@H](Cc1ccc(Oc2cc(I)c(O)c(I)c2)c(I)c1)C(=O)O |   |   | 0 |
| OC(Cc1cn(N=O)c2ccccc12)C(=O)O                   | 1 |   |   |
| CCCCNCCCC                                       | 0 |   |   |

|                                               |   |   |   |
|-----------------------------------------------|---|---|---|
| Cc1ncc(CO)c                                   | 0 | 0 | 0 |
| CC(C)OC(=O)C=Cc1oc(cc1)N(=O)=O                |   |   | 1 |
| COc1cc2NC(=O)NC(=O)c2cc1OC                    |   |   | 0 |
| O=N(=O)c1ccc(Oc2ccc(cc2)N=C=S)cc1             |   |   | 1 |
| N[C@@H](Cc1cc(cc(CP(=C                        | 0 |   |   |
| Cc1onc(c1)C(=O)NCCc2ccc                       | 0 |   |   |
| CCN[C@H]1C[C@H](C)S(=O)(=O)c2sc(cc12)S(=O)(=O |   |   | 0 |
| CC(C)C1=CC2=CC[C@H]3[C                        | 0 |   |   |
| CCCc1c(O)c(c                                  | 0 |   |   |
| CC(C)CC(=O)OCC=C                              |   | 0 | 0 |
| OC(=O)c1c(Br)c(Br)c(Br)c(Br)c1C(=O)O          |   | 0 |   |
| C\C=C\1/C[C@H]2C[C@@H]1C=C2                   |   | 0 |   |
| CCOC(=O)[C@H](C)O                             |   | 0 |   |
| ClCCBr                                        |   | 1 |   |
| Cc1ccc2cc3c4ccccc4C5OC5c3c6CCc1c26            |   | 1 |   |
| Clc1nsc2ccc(cc12)N(=O)=O                      |   | 1 |   |
| NC(CSC(F)(F)C(Cl)Cl)C(=O)O                    |   | 0 |   |
| O=C1c2ccccc                                   | 0 | 0 | 1 |
| O=C1C=CC(=O)N1c2ccc(Cc3ccc(cc3)N4C            |   | 0 |   |
| Oc1c2ccccc2nc3ccc4OCCOc4c13                   |   | 1 |   |
| ON(C(=O)c1ccccc1)c2ccc3c(Cc4ccccc34)          |   | 1 |   |
| NS(=O)(=O)Cc1noc2ccccc12                      |   |   | 0 |
| CC(=O)OCC(=                                   | 0 | 0 |   |
| FC(F)(F)\C(=N/OCC1OCCO1)\c2ccc(Cl)cc2         |   |   | 0 |
| O1C2C=Cc3ccnc3C12                             |   | 1 |   |
| [O-][N+](=O)c1ccccc1SS\C(=C/Cl)\C(=C          |   | 1 |   |
| [O-][N+](=O)c1cccc(CCl)c1                     |   | 1 |   |
| [O-][N+](=O)c1ccc2nc3ccccc3nc2c1              |   | 1 |   |
| CCC(=C(CC)c1ccc(O)cc1)c2ccc(O)cc2             |   |   | 1 |
| OCC(CO)(CO)N(=O)=O                            |   |   | 0 |
| O=C1CCCCCCCCCCCCCO1                           |   |   | 0 |
| [O-][N+](=O)c1ccccc1\C=C\C=C(/C#N)\c          |   | 1 |   |
| CS(=O)c1ccc(Cl)cc1                            |   | 0 |   |
| CCOC(=O)\C=                                   | 0 | 0 |   |
| Cc1cccc(C=C)c1                                |   |   | 0 |
| CC[C@H]1CN2CCc3cc(OC)c(OC)cc3[C@H             |   | 0 |   |
| Fc1ccc2c3cc4ccccc4cc3c5ccccc1c25              |   | 1 |   |
| Nc1cc(c(N)cc1Cl)[N+](=O)[O-]                  |   | 1 |   |
| OC(C(=O)OC1C[C@H]2CC[C@H](C1)[N+]23CCCC3)(    |   |   | 0 |
| CC(Br)C(=O)NC(C)(C)C                          |   | 0 |   |
| [CH2-][N+](=O)[O-]                            |   | 0 |   |
| CC(C)N=C=NC(C)C                               |   | 0 | 0 |
| CCCCC1=NC2                                    | 0 | 0 |   |

|                                                  |   |   |   |
|--------------------------------------------------|---|---|---|
| CCCN1CC2CC3C(CC(C)CN3C#N)c4cccc1c2               | 1 |   |   |
| COc1cccc2c1cc(c3c(cc4OCOC4c23)C(=O)[O-])N(=O)=C  |   | 1 |   |
| NC1=CC(=CN                                       | 0 | 0 | 0 |
| CC(C)n1c(\C=C\[C@H](O)C[C@@H](O)C                | 0 |   |   |
| Cn1c(N)nc2ccc(cc12)C#N                           | 1 |   |   |
| C[C@@H](c1ncncc1F)[C@](O)(Cn2cncn2)c3ccc(F)cc3   | 0 |   | 1 |
| CNC(=O)[C@H]1O[C@H]([                            | 0 |   |   |
| O=C1CCC(=N                                       | 0 | 0 | 0 |
| COc1cc(cc(OC)c1O)C2C3C(COC3=O)C(O                | 0 |   |   |
| CC[C@@H](CO)NCCN[C@@H](CC)CO                     |   | 0 |   |
| CCOC(=O)N(N=O)C(CCC=O)c1cccnc1                   | 1 |   |   |
| Nc1cccnc1                                        |   | 0 |   |
| Nc1ccc2nc3c(N)cccc3nc2c1                         | 1 |   |   |
| CC(=NN=Cc1cn(=O)c2ccccc2n1=O)O                   | 1 |   |   |
| COc1ccc(cc1(                                     | 0 | 0 | 0 |
| Cc1ncsc1CCCl                                     |   | 0 | 0 |
| Cc1cc2CCC(=O)c2c3ccc4ccccc4c13                   | 1 |   |   |
| C[C@@H](O)CN(C[C@H](O)CO)N=O                     | 1 |   |   |
| C[C@]12CC[                                       | 0 | 1 | 0 |
| Cc1ccnc(N[S+](=O)([O-])c:                        | 0 |   |   |
| CC(C)(CS(=O)(=O)O)NC(=O)C=C                      |   | 0 |   |
| O=N(=O)c1ccc2c3ccccc3c4ccc5ccc1c2c               | 1 |   |   |
| O=C(OCCCc1ccccc1)C=Cc2ccccc2                     |   | 0 |   |
| CCCCCCCCCCCCCl                                   |   | 0 |   |
| CNC(=O)N(C)N=O                                   | 1 |   |   |
| CC(C)c1ccc(OP(=O)(Oc2ccccc2)Oc3ccccc             | 0 |   |   |
| CN(C)CCNC(=O)c1cccc2C(=O)c3ccccc3C(              | 1 |   |   |
| CN\C(=N/c1c                                      | 0 | 0 | 0 |
| Cc1ccc(cc1)C                                     | 0 | 0 |   |
| Nc1cc(Cl)c(Cl)c(Cl)c1                            | 0 |   |   |
| COc1ccc(O)c2C(=O)c3c(OC)cc4O[C@@H                | 1 |   |   |
| Cc1ccccc1C(=O)Nc2ccc(C(=O)N3CCCC(O)c4cc(Cl)ccc3' | 1 |   |   |
| CCC1(OC1(C(=O)N)C(=O)OC)C(C)O                    | 0 |   |   |
| O=C1NC=Nc2ccccc12                                |   | 0 |   |
| CC(C)[C@H]1CC[C@@H](C                            | 0 |   |   |
| CCN(CCO)CCn1c(Cc2ccccc2)nc3N(C)C(=O)N(C)C(=O)c:  | 0 |   |   |
| CN\C(=N/C#N)\NCCSCc1c:                           | 0 |   | 0 |
| CC(=O)Oc1cc                                      | 0 | 0 |   |
| COc1ccc(cc1(                                     | 0 | 0 |   |
| COc1ccccc1Oc2c(N[S+](=C                          | 0 |   |   |
| C[C@]12CC[C@H]3[C@@H](CC=C4NC(=                  | 1 |   |   |
| Oc1c(Br)cc\                                      | 1 | 0 |   |
| OC(=O)[C@                                        | 0 | 0 |   |

|                                               |   |   |   |   |
|-----------------------------------------------|---|---|---|---|
| CCCCC\C=C/CCCCCCCC(=O)O                       |   |   |   | 0 |
| CCCC(CC)CN1CN(CC(CC)CCCC)CC(C)(N)C1           |   |   |   | 0 |
| C=Cc1ccc(cc1)N(=O)=O                          |   |   | 1 |   |
| FC1(F)C(F)(F                                  | 0 | 0 |   | 0 |
| OC(=O)c1cc(Cl)ccc1O                           |   |   | 0 |   |
| CCCc1c(O)c(CC=O)ccc1OC(                       |   | 0 |   |   |
| Nc1ccc(\C=C\c2ccc(cc2)[N+](=O)[O-])cc         |   |   | 1 |   |
| NO                                            | 0 | 0 |   |   |
| CCCCC(=O)Cl                                   |   |   |   | 0 |
| COc1ccc(COC)cc1                               |   |   |   | 0 |
| CN(CC(O)CO)N=O                                |   |   | 1 |   |
| Cc1cc(O)c2C(=O)c3c(O)ccc                      | 0 |   | 1 | 1 |
| CC1=CN([C@                                    | 0 | 0 |   | 0 |
| CCN(CC)CCNC(=O)c1cc(Br)                       |   | 0 |   | 0 |
| CCCCc1ccc2[C@@H]([C@H]([C@H](c3ccc(OC)cc3C[C@ |   |   |   | 0 |
| Nc1ccc(cc1)S(=O)(=O)O                         |   |   | 0 |   |
| C[C@@H]1C                                     | 0 | 0 |   |   |
| COC1=CC=C2C(=CC1=O)C(Cc3cc(OC)c(C             |   |   | 0 |   |
| Clc1c(Cl)c(C#N)c(Cl)c(C#N)c1Cl                |   |   | 0 |   |
| C(C1CO1)c2cccc3cccc23                         |   |   | 1 |   |
| Nc1nc(cs1)\C(=C\CC(=O)O)\C(=O)N[C@H]2[C@H]3S( |   |   |   | 0 |
| COP(=S)(OC)Oc1cc(Cl)c(Cl)cc1Cl                |   |   |   | 1 |
| CCc1cccc2cc(oc12)[C@H](O)CNC(C)(C)C           |   |   | 0 |   |
| Clc1ccc(OS(=O)(=O)c2ccc(Cl)cc2)cc1            |   |   |   | 1 |
| CCO[P@](=S)(CC)Sc1cccc1                       |   |   | 0 |   |
| Cc1cccc2ccc3cc4cccc4cc3c12                    |   |   | 1 |   |
| Clc1nncc2cnccc12                              |   |   | 0 |   |
| CCc1ccc(cc1)                                  | 0 | 0 |   | 0 |
| CC1(CC(O)C2(C)C(CCC3C4(C)CCCC23OC4            |   |   | 0 |   |
| [O-][n+]1cccc2C3OC3C=Cc12                     |   |   | 0 |   |
| OC(Cn1cncn1)(c2ccc(F)cc2)c3cccc3F             |   |   |   | 0 |
| OC[C@H]1O[C@H]([C@H](O)[C@@H]1O)n2cnc3c(O)    |   |   |   | 0 |
| CC1CC(CC(C)(                                  | 1 | 0 | 0 | 0 |
| OC(=O)c1ccc2cc(ccc2c1)C(=O)O                  |   |   |   | 0 |
| Cn1ccnc1N(=O)=O                               |   |   | 1 |   |
| CC1=Nc2ccc(                                   | 0 |   |   | 0 |
| Cc1ccsc1                                      |   |   | 0 |   |
| C[C@]12CCC3C(CCC4=C(Cl)                       |   | 0 |   |   |
| O=CCCC=O                                      |   | 0 | 1 | 0 |
| OC(=O)[C@@H]1C[C@H](CP(=O)(O)O)CCN1           |   |   |   | 0 |
| COP(=S)(Cl)OC                                 |   |   | 0 | 0 |
| C\C=C/C=C/C/C=C/C=C/C=C(C\C)/C=C/C=C(C        |   |   | 0 |   |
| [O-][N+](=O)c1ccc(N2CCN                       |   | 0 |   |   |

|                                               |   |   |   |
|-----------------------------------------------|---|---|---|
| CC1(C)C2CCC1(C)C(O)C2                         | 0 |   |   |
| OC(=O)C1CSCN1N=O                              | 0 |   |   |
| CCC(=N(=O)O)C                                 | 0 |   |   |
| CCOP(=S)(OCC)SCCSCC                           | 0 | 0 |   |
| [O-][N+](=O)c1ccc2Oc3cc(ccc3Oc2c1)[N          | 1 |   |   |
| CCN[C@@H]1CN(CCCOC)[                          | 0 |   |   |
| OC1COC(Nc2ccc(cc2)C(=O)O)C(O)C1O              | 0 |   |   |
| CC(CN(CC(C)OC(=O)C)N=O)OC(=O)C                | 1 |   |   |
| Nc1ccccc1C(=O)OC\C=C\c2ccccc2                 | 0 |   |   |
| CC(C)COCC(CN(Cc1ccccc1),                      | 0 |   |   |
| OC[C@H]1O[C@H](C[C@                           | 0 |   |   |
| CN1[C@H](C                                    | 1 |   |   |
| C[C@]12CC(=                                   | 0 |   | 0 |
| C\C(=C/C=O)\Cl                                | 1 |   |   |
| CC(=O)O[C@                                    | 0 | 0 |   |
| C[C@H]1CS(=O)(=O)CCN1\N=C\c2oc(cc             | 1 |   |   |
| CCOc1ccc(N\C(=N\c2ccc(OCC)cc2)\C)cc1          |   |   | 0 |
| NC(=N)NC(=I                                   | 1 | 0 |   |
| CCOC(=O)N(C)C(=O)CSP(=S)(OCC)OCC              |   |   | 0 |
| COc1cc(ccc1                                   | 0 | 0 | 0 |
| CC(C)NNC(=C                                   | 0 | 0 | 0 |
| CNC(=O)\C=C\c1oc(cc1)[N+](=O)[O-]             | 1 |   | 1 |
| CNC1C(O)C(C                                   | 0 | 0 |   |
| NC1=NC(=O)C(O1)c2ccccc2                       |   |   | 0 |
| CNC(=O)Oc1ccccc1                              | 0 |   |   |
| C1Cc2cccc3cccc1c23                            | 0 | 0 |   |
| CCN(CC)CC#C                                   | 1 | 1 | 0 |
| [O-][N+](=O)c1oc(C=O)cc1                      | 1 |   |   |
| CN(C)c1cccc2c(cccc12)[S+                      | 0 |   |   |
| CNC(=O)CN(CCN(CCN(CC(=O)[O-])CC(=O)NC)CC(=O)[ |   |   | 0 |
| Cc1ccc(N=Nc2c(O)ccc3ccccc23)c(c1)S(=          | 0 |   |   |
| CNc1ccc(cc1)N=Nc2ccc3ncsc3c2                  | 1 |   |   |
| COC(=O)C1(O)c2ccccc2c3ccccc13                 |   |   | 0 |
| COc1ccc(cc1[N+](=O)[O-])C2=C(C(=O)c           | 1 |   |   |
| C([C@@H]1CN2CCC1CC2)N3c4ccccc4Sc5ccccc35      |   |   | 0 |
| C[C@H](CCCC(C)(C)O)[C@                        | 1 |   | 1 |
| COc1ccc2C[C@H]3NCC[C@@]45[C@@H](Oc1c24)[C     |   |   | 0 |
| CN(C)CCCCI                                    | 1 |   | 0 |
| Cc1c2ccccc2cc3c4C(O)C(O)C=Cc4ccc13            | 1 |   |   |
| CCN(CC)C(=O                                   | 1 | 0 |   |
| CCOC(=O)c1c                                   | 0 | 0 | 0 |
| NCC1CCC(CC1)C(=O)c2ccc(CCC(=O)O)cc            | 0 |   |   |
| Cc1cccn2c1nc3ccc(N)nc23                       | 1 |   |   |

|                                        |   |   |   |   |
|----------------------------------------|---|---|---|---|
| Oc1ccc(Cl)cc1C(=O)c2ccccc2             |   |   |   | 1 |
| CC(=O)OC(C1CO1)c2ccc3OCOC3c2           |   |   | 1 |   |
| CCOc1ccc(N)c(c1)N(=O)=O                |   |   |   | 0 |
| CC(=O)NCCO                             |   |   |   | 0 |
| Br\C=C\1/CC                            | 1 | 0 |   |   |
| CC(C)C1CCC(C1)C                        | 0 | 0 | 1 |   |
| CSC1=NN=C(C(=O)N1N)C(C)(C)C            |   |   |   | 0 |
| Cc1ncc(N(=O)=O)n1CCO                   |   |   | 1 | 0 |
| [O-][N+](=O)\C(=C\c1ccccc1)\Br         |   |   | 1 |   |
| O=C(CN1CCN                             | 1 | 1 |   | 0 |
| CN1N=C(N)c1                            | 0 | 1 |   | 1 |
| CCCCCCC(=O)OCCN1CCN(CCCN2c3ccccc2      |   |   | 0 |   |
| CC(=Nc1ccc(C=CC(=O)c2ccccc2)cc1)O      |   |   | 1 |   |
| CCC1(O)CC(OC2CC(N)C(O)C(C)O2)c3c(O     |   |   | 1 |   |
| COc1cc(cc(O)c1)C                       | 0 | 0 |   | 0 |
| CCN1C(c2ccccc2)c3cc(N)ccc3c4ccc(N)cc   |   |   | 1 |   |
| COc1cc(OC)c1                           | 0 | 0 |   | 0 |
| CCCCCCCCCCC(=O)N(C)CC(=O)[O-]          |   |   |   | 0 |
| CN(Cc1ccc(Cl)nc1)\C(=N/C#N)\C          |   |   |   | 0 |
| Cc1nc(C)c(C)nc1C                       |   |   |   | 0 |
| Cc1cc2ccccc2c3cc(c4ccccc4c13)[N+](=O   |   |   | 1 |   |
| CC(=O)N[C@H](C)C                       | 0 | 0 |   |   |
| OC(=O)c1cn(=O)c2ccccc2n1=O             |   |   | 1 |   |
| COCCOC(=O)C                            | 0 | 0 |   |   |
| OC(=O)c1ccc(cc1)C                      | 0 | 0 |   | 0 |
| O1C2C1c3ccccc4C5OC5c6ccccc2c6c34       |   |   | 1 |   |
| CN(C)c1ccc(cc1)C                       | 0 | 0 | 0 | 1 |
| O=C(NC1CCN                             | 1 | 1 |   | 0 |
| CC(=O)Nc1nc(\C=C/c2oc(cc2)[N+](=O)[O-] |   |   | 1 |   |
| N[C@H](C)[C@H](CC(=O)O)C               |   |   |   | 0 |
| OC(=O)c1ccc(cc1)C                      | 0 | 0 |   | 0 |
| CC(=C[C@@H](C)C                        | 0 | 0 |   | 0 |
| CC1NCCOC1c                             | 0 | 0 |   | 0 |
| CCCCCCCC\C=C/CCCCCCCC(C)C              |   |   | 0 | 1 |
| O=C1NC(=O)C                            | 0 | 0 |   | 0 |
| CCOP(=O)(SC(C)CC)N1CCSC1=O             |   |   |   | 0 |
| OC(=O)CCSSCCC(=O)O                     |   |   |   | 0 |
| OC1C=Cc2c(ccc3c4CCC(=O)c4ccc23)C1O     |   |   | 1 |   |
| CCOS(=O)(=O)C                          |   |   | 1 | 0 |
| O[C@H]1C=Cc2cc3ccc4c(ccc5ccc(c2)[C@    |   |   | 1 |   |
| CC(=O)ON(OCc1ccc(C)cc1)C(=O)c2ccccc    |   |   | 1 |   |
| CC(C)COCNC(=O)C=C                      |   |   |   | 0 |
| CC(O)CN(CC(O)CO)N=O                    |   |   | 1 |   |



|                                            |   |   |
|--------------------------------------------|---|---|
| CC(C)CCCC(=O)O                             |   | 0 |
| CC(=CCO)C                                  |   | 0 |
| ClC(Cl)(Br)Br                              |   | 0 |
| OC(=O)C1=CCCN(C1)N=O                       | 1 |   |
| C\C=C\Cl                                   | 1 |   |
| COc1ccc(cc1)N=[N+](O)c2ccc(OC)cc2          | 1 |   |
| C(CSc1ccccc1)Sc2ccccc2                     | 0 |   |
| Nc1cc2[nH]c3ccccc3c2cc1[N+](=O)[O-]        | 1 |   |
| FC(=C(F)F)F                                | 0 |   |
| Cc1cc2c(O)cccc2c3cc4ccccc4cc13             | 1 |   |
| CCCCCCCCCBr                                |   | 0 |
| N[C@@H](C(=O)N[C@H]1[C@H]2CCC(=C(N2C1=O)C( |   | 0 |
| CCCN(C(=O)CCCl)c1snc2ccccc12               | 1 |   |
| OC(=Nc1cccc(Cl)c1)c2csc(c2)N(=O)=O         | 1 |   |
| CC(=C)[C@@H]1CCC(=CC1)C                    |   | 0 |
| C1C\C=C\CCC2OC2CC\C=C/1                    | 0 |   |
| C[C@@H](CCN(C)C)N(C)C                      | 0 |   |
| OC(=O)COc1ccc(CCN[S+])(=                   | 0 |   |
| OC12CC3CC(C1)C(=O)C(C3)C2                  |   | 0 |
| CC(=O)ON(C(=O)C)c1ccccc1C                  | 0 |   |
| [O-][N+](=O)c1ccc2C(=O)C(=O)c3cccc4c       | 1 |   |
| Cc1cc(Cl)ccc1OCC(=O)O                      | 0 | 0 |
| NC(=N)SCCc1ccc(OCc2ccc(                    | 1 |   |
| [O-]C(=O)c1c                               | 1 | 0 |
| O=N(=O)c1ccc2ccc3ccccc4C5OC5c1c2c34        | 1 |   |
| NC(=O)c1ccc(cc1Cl)N(=O)=O                  |   | 0 |
| CCCCCCCCC                                  | 0 | 0 |
| CC(C)(O)[C@                                | 0 | 0 |
| CN(C)NC(=O)CCC(=O)O                        | 0 | 0 |
| CCOc1cc(OP(=S)(OC)OC)nc(CC)n1              |   | 0 |
| C[C@H]1CCC[C@@H](C)N1                      |   | 0 |
| Cc1cnc(S)nc1O                              | 0 |   |
| CN(C)c1ccc2nc3cc(C)c(N)cc3[s+](c2c1        | 1 | 1 |
| C[C@]12CCC3[C@@H](CC                       | 0 |   |
| CC1(C)CC(=O)C(C2C3=C(CC                    | 0 |   |
| CCN(CC)c1ccc(cc1)c2ccc(cc2)c3ccc(cc3)c     | 0 |   |
| Cc1cnc2c(cc(C)c3c2nc(N)n3C)n1              | 1 |   |
| CC(C)CCCCCc1ccc(OCCOCCO)cc1                |   | 0 |
| Clc1ccc(Cl)nc1                             | 0 |   |
| ON(=O)=C=Cc1ccccc1                         | 1 |   |
| CCC(C)COC(=O)C=Cc1ccc(cc1)N=Cc2ccc(        | 1 |   |
| Cc1cc(cc(c1)C#N=O)C#N=O                    | 1 |   |
| Oc1ccc2c(ccc3c4ccccc4c1c23)[N+](=O)[       | 1 |   |

|                                                  |   |   |   |   |
|--------------------------------------------------|---|---|---|---|
| N#CC1(CCCC                                       | 0 | 0 |   | 0 |
| Nc1ccc(cc1)c2ccc(Cl)cc2                          |   |   | 1 |   |
| O[C@@H]1CCN(C1)N=O                               |   |   | 1 |   |
| Cc1c(\C=N\OCc2cccc(c2)[N+](=O)[O-])c             |   |   | 1 |   |
| Nc1cccc1Cl                                       |   |   | 0 | 0 |
| CCCCCCCCCCCCBr                                   |   |   |   | 0 |
| Nc1cccc(c1O)[N+](=O)[O-]                         |   |   | 0 |   |
| Cc1c(C)c2c(nc(N)n2C)c3nccnc13                    |   |   | 1 |   |
| NC(=O)N[C@                                       | 0 | 0 |   |   |
| CCCCCCCCC1                                       | 1 |   |   |   |
| COc1ccc2C[C@@H]3N(C)C                            |   | 0 |   |   |
| O=N(=O)C1=Cc2c3ccc4ccccc4c3cc5cccc1              |   |   | 1 |   |
| CC(=O)OCCC(C=O)c1c(O)cc2C(=O)c3cc(C              |   |   | 1 |   |
| OC1C(O)c2c(ccc3ccccc23)c4ccccc14                 |   |   | 0 |   |
| OCCN(CCO)c1ccc(cc1)N=Nc2ccc(cc2N(=               |   |   | 1 |   |
| CN1CCN(CC1                                       | 0 | 0 |   | 0 |
| C[C@]12CC[C@H](C1)C(C)(C)C2=O                    |   |   | 0 |   |
| COc1cc(C(C)C)c2C(=O)N(COC3=CC(=O)N4C=CC=C(OC     |   |   |   | 0 |
| c1ccc2nc3c4ccccc4c5ccccc5c3cc2c1                 |   |   | 1 |   |
| COc1ccc(cc1OC)C2=C(O)C(                          |   | 0 |   |   |
| Cc1c2ccc3C(O)C(O)C=Cc3c2nc4ccc(CO)c              |   |   | 1 |   |
| CN[C@H](CC                                       | 0 | 0 |   |   |
| COP(=S)(OC)Oc1ccc(cc1)[N+](=O)[O-]               |   |   | 1 |   |
| o1cccc1                                          |   |   | 0 | 0 |
| Nc1nc(O)c2nc(CNc3ccc(cc3)C(=O)NC(CC              |   |   | 0 |   |
| CCc1cc(cc2OCOc12)C3=C(N(c4ccccc4C(F)(F)F)S(=O)(= |   |   |   | 1 |
| OC(=O)c1c(Cl)ccc2cc(Cl)cnc12                     |   |   |   | 0 |
| OCC(O)C(O)C(O)C(O)C1SCCN1N=O                     |   |   | 1 |   |
| COC(=O)CC#N                                      |   |   |   | 0 |
| CCOc1cccc(N)c1                                   |   |   | 1 | 0 |
| CC(C)(Cl)OC(C)(C)Cl                              |   |   | 1 |   |
| CCCCC(O)c1cccc(OCc2ccc                           |   | 0 |   |   |
| CC(C)CC(C)CC(C)\C=C(/C)\C1CC(=O)OC1=O            |   |   |   | 0 |
| CC(C)(C)C=C                                      | 1 | 0 |   |   |
| OC(=O)C(=O)O                                     |   |   | 0 | 0 |
| CC\C=C\C=C\C=C\C=C\C=C\C=C\OCC(C)O               |   |   | 1 |   |
| CC(=CC1C(C(=O)OC2=C(C)C(CC=C)C(=O)C              |   |   | 1 |   |
| COC1CC(CC(C                                      |   | 0 |   |   |
| CN(N=O)C#N                                       |   |   | 1 |   |
| [O-][n+]1cc2ccncc2cn1                            |   |   | 0 |   |
| CCCCCCCCC(=O)OC                                  |   |   |   | 0 |
| NC(=O)N                                          | 0 | 0 | 0 | 0 |
| CC[S+](=O)([O-])N1CCC[C(                         |   | 0 |   |   |

|                                             |   |   |   |   |
|---------------------------------------------|---|---|---|---|
| Cc1ccc(N)cc1Cl                              |   |   |   | 0 |
| CC(=O)Nc1ccc2[nH]c3c(C)c4ccncc4c(C)c        | 0 |   |   |   |
| CCN1C=CN(C)C1C                              |   |   |   | 0 |
| CC(Cl)(Cl)Cl                                |   |   |   | 0 |
| NC(=O)CS(=C                                 | 0 |   |   | 0 |
| [O-][N+](=O)c1ccc(s1)c2nc(N3CCOCC3)         | 1 |   |   |   |
| C1Cc2cc3ccc4cccc5ccc(c2[C@@H]6O[C(          | 1 |   |   |   |
| CC(CC1=C(COC1O)C=O)C2=CCC(C)(C)C2           | 0 |   |   |   |
| Cc1nc2C(=O)C(=CC(=O)c2c3[nH]c4cccc          | 1 |   |   |   |
| CC(C)(CCC(=O)O)C(=O)O                       |   |   |   | 0 |
| CC(=O)O[C@H]1[C@H](O)[C@@H]2O[C(            | 0 |   |   |   |
| NC(CCN=N#N)C(=O)O                           | 1 |   |   |   |
| NC(=O)CNC(=O)C=[N+]=[N-]                    | 1 |   |   |   |
| Cc1onc(N[S+](=O)([O-])c2                    | 0 |   |   |   |
| N#Cc1cccnc1                                 |   |   |   | 0 |
| CC1Cc2c(O)c(C)c3C4C(CCC(=C)c3c2C1=C         | 0 |   |   |   |
| CCCCOC(=O)CCCCCCCC=C                        |   |   |   | 0 |
| OC(=O)C(=O)Nc1cccc(c1)c2nn[nH]n2            | 0 |   |   |   |
| CC(C)[C@@H](C)\C=C\[C@@H](C)[C@H]1CC[C@H]2' | 0 |   |   |   |
| OC(=O)C(=O)Cc1cccc1                         |   |   |   | 0 |
| CC1(C)CCC[C@@]2(C)[C@                       | 0 |   |   |   |
| COc1cccc1C                                  | 0 | 0 |   |   |
| CCCCC(=O)O[C@@]1(CC[C@H]2[C@@H]3CCC4=CC(    |   |   |   | 1 |
| Cc1cc2cccc2c3ccc4C(O)C(O)C5OC5c4c1          | 1 |   |   |   |
| COc1cccc1C2=C(O)C(=O)c                      | 0 |   |   |   |
| COC(=O)C(Cc                                 | 0 | 0 |   |   |
| CN(C)CCCNc1c2cccc2nc3c(ccc(c13)[N+          | 1 |   |   |   |
| COC(=O)C1=                                  | 1 | 0 |   |   |
| Nc1cc2cccc2c3cccc13                         | 1 |   |   |   |
| CC(C)CCCCCOC(=O)C(=C)C                      | 0 |   |   |   |
| OC(=O)\C(=C(/CCl)\C=O)\Cl                   | 1 |   |   |   |
| CC12CCC(C1)C(C)(C)C2O                       |   |   |   | 0 |
| CCC[C@H](C)C1(CC=C)C(=O)NC(=O)NC1=O         |   |   |   | 0 |
| CC=CC(=O)OC1CC2OC3=CC(C)C(=O)CC3(           | 0 |   |   |   |
| O=C(Nc1cccc1)OC[C@H](                       | 0 |   |   |   |
| O=C1CCCCC1=O                                | 1 |   |   |   |
| Cc1ccc(cc1N)N(=O)=O                         | 1 |   |   | 0 |
| COc1ccc(C(=                                 | 1 | 0 | 0 | 0 |
| O=C1CCC(N2                                  | 0 | 0 | 0 | 0 |
| CCc1c2cccc2c(C)c3ccc4cccc4c13               | 0 |   |   |   |
| OCP(CO)(CO)CO                               | 0 |   |   |   |
| Cc1cc2N=C3C(=O)NC(=O)N=C3N(C[C@H](O)[C@H](C |   |   |   | 1 |
| OCC1=CC(=O                                  | 0 | 0 | 1 | 0 |

|                                                 |   |   |   |
|-------------------------------------------------|---|---|---|
| CNCCC(Oc1c                                      | 1 | 1 |   |
| NCCCCN[S+](=O)([O-])c1c                         |   | 0 |   |
| CC1(C)C(O)C(C)(C)C1O                            |   |   | 0 |
| Cc1cc(Cl)ccc1OCCCC(=O)O                         |   | 0 | 0 |
| [O-][N+](=O)c1ccc2oc3ccccc3c2c1                 |   | 1 |   |
| Nc1cccc(N)n1                                    |   | 1 | 1 |
| CC[C@@]1(O)C[C@H](O)[C@H]2C[C@@H]([C@H](O       |   |   | 1 |
| NCCC(=O)NC                                      | 0 |   |   |
| CCCCOC(=O)c1ccccc1C(=O)OC2CCCCC2                |   | 0 |   |
| CCNc1cccc(O)c1                                  |   | 1 |   |
| COC(=O)CCC                                      | 0 | 0 | 0 |
| CCCCCCCCC                                       | 0 | 0 | 0 |
| CC1CNCCN1[S+](=O)([O-])                         |   | 0 |   |
| CNCCc1ccc(C                                     | 0 |   |   |
| C=CCOC(=O)C=C                                   |   | 0 |   |
| [O-][N+](=O)c1ccc(N\N=C(\N=Nc2ccc(              |   | 0 |   |
| Cc1ccc2C(=O)c3ccccc3C(=O)c2c1N(=O)=             |   | 1 | 1 |
| C[N+]1(C)CC                                     | 0 | 0 |   |
| C[C@H](CCC                                      | 0 | 0 |   |
| CC(=C)C1CCC(=CC1)C=O                            |   | 0 |   |
| CN[C@H](CC(C)C)C(=O)N[C@@H]1[C@H](O)c2ccc(O     |   |   | 0 |
| NCCCNCCCCNC(=O)C(O)NC(=O)CCCCCNC(=N)N           |   |   | 0 |
| CSCC(NC(=O)COc1ccccc2cnccc12)C(=O)N             |   | 0 |   |
| O=C1C(=O)c2ccccc3ccccc1c23                      |   | 1 |   |
| O=C1N(CCCCN2CCN(CC2)c3ncccn3)S(=O)(=O)c4ccccc:  |   |   | 0 |
| Cc1ccc(cc1N=C=O)N=C=O                           |   | 1 |   |
| Cc1cnc(c[n+]                                    | 0 | 0 | 0 |
| [O-][n+]1cc2cccnc2cn1                           |   | 0 |   |
| CC(C)CCCCC1ccc(O)cc1                            |   |   | 1 |
| CC1CN(CCN1)c2cc3N(C=C(C(=O)O)C(=O               |   | 1 | 0 |
| OC[C@H]1O[C@@H](OCCc2ccc(O)cc2)[C@H](O)[C@      |   |   | 0 |
| [O-]C(=O)c1cccn1                                |   |   | 0 |
| CSc1ncnc2c1ncn2CC(O)CN=N#N                      |   | 1 |   |
| Cc1ccc(c(O)c1C(O)c2ncc([N+](=O)[O-])r           |   | 0 |   |
| CC\C=C\C=C=O                                    |   | 1 |   |
| COc1cc(OC)c2C(=O)CC(Oc:                         |   | 0 |   |
| CCOC(=O)c1ccccc1C(=C2C=C(Br)C(=O)C(=C2)Br)c3cc( |   |   | 1 |
| CC(C)[C@@H]1CC[C@@H](C)C[C@H]1O                 |   |   | 0 |
| CC(=O)Oc1ccccc2cccn12                           |   | 0 |   |
| Cc1oc(C)cc1                                     |   | 0 | 0 |
| OCc1cccc(Oc2ccccc2)c1                           |   |   | 1 |
| CN1CCN(CC1                                      | 1 | 1 |   |
| CN(C)c1ccc(N=Nc2ccccc2)c(C)c1                   |   | 1 |   |

|                                             |   |   |   |
|---------------------------------------------|---|---|---|
| CCCCC(C)N                                   | 0 | 0 | 0 |
| ClCC(=O)Nc1cccc1                            |   |   | 0 |
| CCCN[C@@H]                                  | 0 | 0 |   |
| COc1cc(C=O)ccc1O                            |   | 0 | 0 |
| Cc1c(O)cc2C(=O)c3cccc3C(=O)c2c1O            |   |   | 1 |
| CCCCCCCC(=O)O                               |   |   | 0 |
| CCCC(=O)O[C@@]1(CC[C@H]2[C@@H]3CCCC4=CC(=O) |   |   | 0 |
| COC(=O)CC1Cc2cc3cc(OC)c(c(O)c3c(O)c         |   | 0 |   |
| ClC1(Cl)C2(Cl)C3(Cl)C4(Cl)C(=O)C5(Cl)C(     |   | 0 | 1 |
| CCOc1ccc(\C=C\C(=O)c2cc                     |   | 0 |   |
| CCN(C(C)C)c1nc(N)c(nc1Cl                    |   | 1 |   |
| CC(=O)Nc1ccc(Cc2ccc(N)c(Cl)c2)cc1Cl         |   |   | 1 |
| [O-][N+](=O)c1cccc1\C=C\c2ccccn2            |   |   | 1 |
| CNC(=S)NN                                   |   |   | 0 |
| NC(=O)c1ccc                                 | 0 | 0 | 0 |
| CC(C)Nc1cccc2C(=O)c3cccc3C(=O)c12           |   |   | 1 |
| OC(CO)c1cccc                                | 0 | 0 | 0 |
| FC(F)(F)c1cc                                | 0 | 0 | 1 |
| O=C1\C=C\c2ccsc2)\CC/C                      |   | 0 |   |
| OCC1COC(CCl)O1                              |   |   | 1 |
| c1ccc(cc1)N=Nc2cccc2                        |   |   | 1 |
| C[C@H]1CN1                                  |   |   | 1 |
| O=C[C@H]1CO1                                |   |   | 1 |
| CCN(CC)C(=O)C                               |   |   | 0 |
| Nc1c(Br)cc(Br)cc1CNC2CC                     |   | 0 |   |
| c1cc2ccc3cc4cccc5ccc6cc(c1)c2c3c6c45        |   |   | 1 |
| ClC1=C(Cl)C(=O)C(=C(Cl)C1=O)Cl              |   |   | 1 |
| CC(O)CN(C)N=O                               |   |   | 1 |
| CCNCCN                                      |   |   | 0 |
| C1CCC2CC3(CCC2C1)CO3                        |   |   | 0 |
| OC[C@H]1O(                                  | 0 | 0 |   |
| Cc1cc(C)nc(Nc2cccc2)n1                      |   |   | 0 |
| C1CCC2OCCOCCOC3CCCC3OCCOCCOC2               |   | 0 |   |
| O[S+](=O)([O-])c1cccc2c(c                   |   | 0 |   |
| CCC(C)(C)c1cc(O)c(cc1O)C(C)(C)CC            |   |   | 1 |
| CC(=O)Nc1cc2Cc3cccc3c2cc1Cl                 |   |   | 1 |
| Oc1ncc(N(CC                                 | 0 | 0 | 1 |
| CN(C)C(=S)S                                 |   |   | 0 |
| CC(C)(CO)[C(                                | 0 | 0 |   |
| CCN(CC)C(=O)Cc1cccc1                        |   |   | 0 |
| Oc1c(CC=C)cccc1\C=N\NC                      |   | 1 |   |
| S=C=Nc1cccc(c1)C2(CCCCC                     |   | 1 |   |
| O1[C@H]2C=Cc3ccnc3[C@@H]12                  |   |   | 1 |

|                                                  |   |   |   |
|--------------------------------------------------|---|---|---|
| CCC(C)C(=O)C                                     | 0 | 0 |   |
| [O-]S(=O)(=O)c1cccc1C=Cc2ccc(cc2)c3ccc(C=Cc4cccc |   |   | 0 |
| O=C(C1OC1c2ccc(cc2)c3cc                          | 0 | 0 |   |
| COC(=O)c1cc                                      | 0 |   | 0 |
| CCCCC1C(=O)                                      | 0 | 0 | 1 |
| CC1=Nc2c(O)cccc2C(=O)N                           | 0 |   |   |
| OCC(O)CCI                                        |   | 1 | 0 |
| CN(Cc1cnc2nc(N)nc(N)c2n1)c3c(Cl)cc(cc            | 0 |   |   |
| C[C@H]1N=C(N)O[C@H]1c2cccc2                      |   |   | 0 |
| CC1C2C(=Nc3cccc23)N(C)c4ccc(C)cc14               | 1 |   |   |
| Nc1ncnc2c1nc(c3ccc(cc3)[N+](=O)[O-])             | 1 |   |   |
| Clc1cc2Oc3cc(Cl)c(cc3Oc2cc1Cl)N(=O)=             | 1 |   |   |
| C[C@H](N)[C                                      | 0 | 0 | 0 |
| OC(CC(C1=C(O)c2cccc2OC1=O)c3cccc3)c4ccc(cc4)c!   |   |   | 1 |
| OCCCCCCI                                         |   |   | 0 |
| CCCCC(CC)COC(=O)c1ccc(cc1)N(C)N=O                | 0 |   |   |
| CCCCCCCCN(C)CCCCCCC                              |   |   | 0 |
| N[C@H](CCC                                       | 0 | 0 | 0 |
| CC(C)c1ccc(O)c(c1)C(C)C                          |   |   | 1 |
| Nc1ccc(cc1)S                                     | 0 |   | 0 |
| CCN1N=C(C(=                                      | 0 | 0 | 1 |
| [NH3+]C(=N)                                      | 0 | 0 | 0 |
| CC(C)NCC(O)COc1cccc2CC(COc12)ON(=                | 0 |   |   |
| Nc1c2cccc2nc3ccc(O)cc13                          | 1 |   |   |
| CN1CCN(CC1                                       | 0 | 0 |   |
| OC1C=Cc2c(cc3cccc3c2[N+](=O)[O-])C:              | 1 |   |   |
| O=P(Oc1cccc1)Oc2cccc2                            |   |   | 0 |
| Cc1cccc(c1)C2=CC(=O)c3cc                         | 0 |   |   |
| COc1cc2CC(CC3CCN(Cc4cccc4)CC3)C(=O)c2cc1OC       |   |   | 0 |
| OC(=O)c1cccc1Cl                                  |   | 0 |   |
| CC(C)C(=O)C                                      |   |   | 0 |
| CNC(=O)[C@H]1O[C@H]([                            | 0 |   |   |
| COC(=O)C1=C(C)N(CC#C)C                           | 1 |   |   |
| O=N(=O)c1ccc2c(c1)c3ccc(c4cccc2c34)N             | 1 |   |   |
| CO[C@H]1[C@H](O)CC(=O)O[C@H](C)CC=CC=C[C@H       |   |   | 0 |
| CCCCCCCC(=O)OC(CC(=O)C                           | 0 |   |   |
| OCC1O[C@H                                        | 0 | 0 |   |
| CCCCCCCCCCCC(=O)N(O)c1ccc2c(Cc3c                 | 1 |   |   |
| COc1cccc(c1)N=C(O)c2csc(c2)N(=O)=O               | 1 |   |   |
| OC(=O)C(=O)Cc1c[nH]c2cccc12                      |   |   | 1 |
| Cc1cc(C)c(N)c(Cl)c1                              |   |   | 0 |
| Cc1cnc2cc(C)c3c(nc(N)n3C)c2n1                    | 1 |   |   |
| CC(=O)Nc1ccc2c(Cc3cccc23)c1OC(=O)C               | 0 |   |   |

|                                      |   |   |   |   |
|--------------------------------------|---|---|---|---|
| CC(Cc1cccc(c1)C(F)(F)F)N(C           | 0 |   |   |   |
| CC(=O)N(OC1OC(CO)C(O)C(O)C1O)c2cc    |   |   | 1 |   |
| NCCCCCCCCCN[S+](=O)([O-              | 0 |   |   |   |
| NC(Cn1ccnc1)C(=O)O                   |   |   | 1 |   |
| COc1cc2C(=O)c3cc(C)cc(O)c3C(=O)c2c(C |   |   | 1 |   |
| CC(C)C[C@H]                          | 0 | 0 |   |   |
| Cc1cccc(C)c1[N+](=O)[O-]             |   |   | 0 |   |
| OC[C@@H](C                           | 0 | 0 |   | 0 |
| CN1C(=O)CC(C1=O)c2cccc2              |   |   |   | 0 |
| Nc1ncnc2c1ncn2C(c3cccc3)(c4cccc4)c   |   |   | 1 |   |
| CCNS(=O)(=O)c1ccc(C)cc1              |   |   | 0 | 0 |
| CCCCC(=O)OC1(CCC2C3CCC4=CC(=O)C      |   |   | 0 |   |
| O1C2C=Cc3ncccc3C12                   |   |   | 0 |   |
| NNc1ccc(cc1)[N+](=O)[O-]             |   |   | 1 |   |
| CC(C)(c1ccc(OC[C@H]2CO2)cc1)c3ccc(C  |   |   | 1 |   |
| [O-][N+](=O)c1cccc2c1OC(=O)c3cccc2:  |   |   | 1 |   |
| COC(=O)C1=C                          | 1 | 0 |   |   |
| Nc1ccc(cc1)[S+](=O)([O-])            |   | 0 |   |   |
| CN1C(=O)N(C)C(=O)C(=C1N)N=O          |   |   |   | 0 |
| CC1COc2c(N:                          | 0 | 0 | 0 | 0 |
| Oc1ccc(cc1)c2cccc2                   |   |   | 1 |   |
| CC(CN(C)C)C(                         | 1 | 0 |   | 0 |
| COc1ccc2nc3occc3c(OC)c2c1            |   |   | 1 |   |
| Cc1nc(Nc2nc                          | 0 |   |   |   |
| CC(=O)[C@H                           | 0 |   |   | 0 |
| OC(=O)CCS                            |   |   |   | 0 |
| [O-][N+](=O)c1ccc2cc3cccc3cc2c1      |   |   | 1 |   |
| Cc1onc(O)c1CCC(N)C(=O)C              |   | 0 |   |   |
| Cc1cc(C)cc(N)c1                      |   |   | 1 | 0 |
| O=N(=O)c1ccc2ccc3cc4C=CCc4c5ccc1c:   |   |   | 1 |   |
| Sc1cccc1                             |   |   | 0 | 0 |
| CO\N=C(/C(=                          | 0 | 0 |   |   |
| CC(C)(C)CC(C)(C)c1cccc1O             |   |   |   | 1 |
| CCN(CC)CCN(C                         | 1 | 0 |   | 0 |
| Cc1ccc(cc1C)N=Nc2c(O)ccc3cccc23      |   |   | 0 |   |
| CC[C@@H](O)\C=C\C=C\C=C\C=C\C=C=O    |   |   | 1 |   |
| CCOc1ccc2NC(C)(C)CC(C)c2c1           |   |   |   | 0 |
| CCCC(C)(CO)CO                        |   |   |   | 0 |
| CC(=C)OC(=O)C                        |   |   | 0 | 0 |
| Nc1cc(Cl)c(cc1O)N(=O)=O              |   |   | 1 | 1 |
| CN(C)CCNC(=O)c1cccc2ccc(nc12)c3cccc  |   |   | 1 |   |
| COc1ccc(CN=                          | 0 | 0 |   |   |
| ClC(Cl)(Cl)Cl                        |   |   | 0 | 0 |

|                                                                |   |   |   |   |
|----------------------------------------------------------------|---|---|---|---|
| NNC(=O)CP(=                                                    | 0 | 0 |   |   |
| OCC1CCC(O1)n2cnc3c(O)ncnc23                                    |   |   | 1 |   |
| Clc1ccc(cc1)C                                                  | 0 | 0 |   | 1 |
| CCOc1ccccc1O                                                   |   |   |   | 0 |
| OC[C@H]1O[C@H](O[C@H]2[C@H](O)[C@@H](O)[C@H]2O)[C@H](O)[C@H]1O |   |   |   | 0 |
| OS(=O)(=O)N                                                    | 0 | 0 |   | 0 |
| COc1ccc(cc1N(=O)=O)C(=O)Nc2ccccc2                              |   |   |   | 1 |
| Cc1c(N)cc(cc1N)[N+](=O)[O-]                                    |   |   | 1 |   |
| CN(C)c1ccc(c                                                   | 1 | 0 | 0 | 1 |
| OC(C1CO1)c2ccc3OCOc3c2                                         |   |   | 1 |   |
| CCl                                                            |   |   | 1 |   |
| CC(N)C(=O)N(CCCc1cccnc1)c2c(C)cccc2C                           |   |   |   | 0 |
| C[N+](C)(C)CCOC(=O)C=C                                         |   |   |   | 0 |
| Nc1cnc2ccccc2c1                                                |   |   | 1 |   |
| Cc1cc(N)c(cc1N)[N+](=O)[O-]                                    |   |   | 1 |   |
| CCCCCCCCCn1cc[n+](C)c1                                         |   |   |   | 1 |
| Cc1c2ccccc2c(C)c3ccccc13                                       |   |   | 1 |   |
| CC(C)(C)C1=CC(=O)C=C(C1=O)C2=CC(=O)C=C2                        |   |   | 1 |   |
| CC(=O)OCc1c2ccccc2c3ccc4cccc5ccc1c3                            |   |   | 1 |   |
| CN1C(=O)CC                                                     | 0 | 0 | 0 | 0 |
| C[C@H]1O[C@H](C[C@H]1O)C                                       |   | 1 |   | 1 |
| Cc1ccccc1C(=O)N                                                |   |   | 0 | 0 |
| CN(C)[C@@H]1O[C@H](C1)C                                        | 0 | 0 |   |   |
| Cc1cc2c(nc(N)n2C)c3nc(cnc13)c4ccccc4                           |   |   | 1 |   |
| Oc1ccc(cc1)C                                                   | 0 | 0 | 0 | 1 |
| CCCCOC(=O)C=C                                                  |   |   | 0 | 0 |
| CCCCOC(=O)Cc1ccc(OCC(=O)N(CC)CC)c(OC)c1                        |   |   |   | 0 |
| CCCC[C@@H](CC)COC(=O)CCCC(=O)O                                 |   |   | 0 |   |
| CN(C)CCCNc1c2ccccc2nc3ccc(cc13)[N+](=O)[O-]                    |   |   | 1 |   |
| CCC(=O)OCc1ccc(cc1)[N+](=O)[O-]                                |   |   | 1 |   |
| Cc1ccc(C)c2c3ccccc3[nH]c12                                     |   |   | 1 |   |
| Oc1cc2ccccc2c3ccc4ccccc4c13                                    |   |   | 0 |   |
| COc1cc(Cl)ccc1Cl                                               |   |   |   | 0 |
| CC1=C(O)C(=O)C(O)CO1                                           |   |   | 1 |   |
| CCCCON(OC(=O)C)C(=O)c1ccc(Br)cc1                               |   |   | 1 |   |
| CCNC(=O)[C@H]1O[C@H](C1)C                                      |   | 0 |   |   |
| CC(C)(C)Br                                                     |   |   | 1 |   |
| CN[C@@H](C)[C@H](O)c1ccccc1                                    |   |   |   | 0 |
| O1C2C1C3N=NC2C4OC34                                            |   |   | 0 | 0 |
| CCN1C[C@]2(C)CC[C@H](C1)C                                      |   | 0 |   |   |
| OC1c2cccc3ccc4c5ccccc5cc1c4c23                                 |   |   | 1 |   |
| Cc1cc(ccc1[N+](=O)[O-])[N+](=O)[O-]                            |   |   | 1 |   |
| CC(=C)CS(=O)(=O)[O-]                                           |   |   |   | 0 |



|                                                |   |   |   |
|------------------------------------------------|---|---|---|
| CC\C=C/C[C@@H]1[C@@                            | 0 |   |   |
| SC(=N\C=C\N=C(S)S)                             |   | 0 |   |
| [O-][N+](=O)c1ccccc1c2ccccc2                   |   | 0 |   |
| CC(=O)c1c(O)cc(O)c2C(=O)c3c(O)cc(O)c           |   | 0 |   |
| COC(=O)c1ccc(C(=O)OC)c(c1)C(=O)OC              |   |   | 0 |
| C[C@]12CC[C@H]3[C@@H](CC(=C)C4=CC(=O)C=C[C@    | 0 |   | 1 |
| C[C@H](\C=C\[C@H](C)C(C)(C)O)[C@H]1CC[C@H]2\   | 1 |   |   |
| OC(=O)c1cc2OCOC2c3c4cccc(O)c4cc(c1:            | 1 |   |   |
| COc1cccc(\C=C\c2ccc(cc2)[N+](=O)[O-]           | 1 |   |   |
| COC1CC(OC(=O)\C=C\c2cc(OC)c(OC)c(O             | 0 |   |   |
| OC(=O)CCCC(=O)O                                | 0 |   | 0 |
| C[C@@H]1O                                      | 0 | 0 |   |
| CCCCCCCCCCCCCCCC                               |   |   | 0 |
| CC(C)CC(C)(c1ccc(O)cc1)c2ccc(O)cc2             |   |   | 1 |
| CCC(CCOCN1C=CN(C)C1\C=N\O)[N+](=C              | 0 |   |   |
| CC(=C)C(=O)OCCOC(=O)C(=C)C                     | 0 |   | 0 |
| OC(=O)C1=Cl                                    | 0 | 0 | 1 |
| CN(C)C(=O)Cl                                   |   |   | 1 |
| CN(Cc1cccc(c1)C#N)N=O                          |   |   | 1 |
| CC(=O)Nc1ccc(cc1)C(=O)[C@@H]2O[C@              | 1 |   |   |
| CCCCN(CCCCO)N=O                                | 1 |   | 0 |
| COc1cccc(OC)c1C(=O)N[C@H]2[C@H]3SC(C)(C)[C@@   |   |   | 0 |
| CCC[CH-][N+](=O)[O-]                           | 0 |   |   |
| ClC1CCCN(C1)N=O                                | 1 |   |   |
| Nc1cccc2ccnnc12                                | 1 |   |   |
| CCCCOCCOCCOCCCC                                | 0 |   | 0 |
| COC(=O)C1C(                                    | 1 | 0 |   |
| N#N=NCc1cccc1                                  |   |   | 1 |
| CC(C)[C@@H](C)\C=C\[C@@H](C)[C@H]1CC[C@H]2'    |   |   | 0 |
| Cc1cccc(n1)c2[nH]c(nc2c3'                      | 0 |   |   |
| CC[C@H]([C@                                    | 0 | 0 | 1 |
| CC1=CC(=O)Oc2c3OC4(C)OOC4(C)c3ccc:             | 1 |   |   |
| NCc1cccc(c1)C2CCN(CC2)C(=O)c3oc(cc3)C#Cc4cccc4 |   |   | 0 |
| CN(C)C(=O)C                                    | 0 | 0 |   |
| COC(=O)c1ccc(CBr)cc1                           |   |   | 0 |
| OC1CCC(CC1)C2CCCC2                             |   |   | 0 |
| S=C(Nc1cccc                                    | 0 | 0 |   |
| CCCCCCCCCCCCCCCC(=O)O'                         |   | 0 |   |
| NCCCS(=O)(=O)Nc1ccc(Nc2c3ccc(cc3nc'            | 1 |   |   |
| O=S1(=O)CCCO1                                  | 1 |   | 0 |
| C[N+]1(C)[C@H]2CC(C[C@@H]1[C@H]3O[C@@H]23      |   |   | 0 |
| COc1ccc(cc1'                                   | 0 | 0 |   |
| C\N=C\1/NC(N(S1)c2cccc                         |   | 1 |   |



|                                         |   |   |   |
|-----------------------------------------|---|---|---|
| COc1ccc(cc1)c2nc([nH]c2c3ccc(OC)cc3)c   | 1 |   |   |
| O1C=C[C@H]2[C@@H]1Oc3ccccc23            | 1 |   |   |
| C[C@@H](C)O                             | 0 | 0 |   |
| CC1(C)CCC2(CCC3(C)C(=CCC4C5(C)CC(O)     | 0 |   |   |
| Oc1c(cc2ccccc2c1N=Nc3cc(Cl)ccc3Cl)C(=   | 1 |   |   |
| Cc1ccc2C(=O)c3ccccc4ccc1c2c34           | 1 |   |   |
| CN(C)C1C2C(O)C3C(=C(O)C2(O)C(=O)C(=     | 0 |   |   |
| CC(C)Nc1ccc1                            | 1 |   |   |
| CCc1ccccc1N=C(O)c2csc(c2)N(=O)=O        | 1 |   |   |
| Oc1ccc2OC(=CC(=O)c12)c                  | 0 |   |   |
| COc1cc(cc(O)1)O                         | 0 | 0 | 0 |
| CCCC[C@H](CC)COCCC#N                    | 0 |   |   |
| CCc1nc2ccc(NC)c(C)c2nc1CC               | 1 |   |   |
| CNC(=O)C                                |   |   | 0 |
| CC(=O)NCCc1                             | 0 | 0 |   |
| CC(=O)OC(C(=O)c1ccccc1)c2ccccc2         | 0 |   | 0 |
| O=C=NC1CCCCC1                           | 0 |   |   |
| BrC(Br)(Br)N(=O)=O                      | 1 |   |   |
| O=C1C[C@H]2OCC=C3Cl                     | 0 |   |   |
| CCCCOc1ccc(1)O                          | 0 | 0 | 1 |
| CN1CCc2cc(Cl)c(O)cc2[C@H]1              | 0 |   |   |
| COCCOCCOCCOC                            | 1 |   | 0 |
| O=C(OC(=O)c1ccccc1)c2ccccc2             |   |   | 0 |
| Nc1ccc(Cc2ccccc2)cc1                    | 1 |   |   |
| NCCN1CCOCC1                             |   |   | 0 |
| Nc1ncnc2c1nc(Br)n2[C@@H]1               | 0 |   |   |
| CC(N)C(O)c1ccccc1                       |   |   | 0 |
| C(C(N1CCCCC1)c2ccccc2)c(=O)N            | 0 |   |   |
| CC(=O)Nc1cc(ccc1C)N=Nc2ccc(C)c(NC(=     | 0 |   |   |
| CC(C)(C)c1ccc(O)c(O)c1                  | 0 |   | 1 |
| ClC(=O)c1ccc(Cl)cc1Cl                   | 1 |   |   |
| CCN(CC)CCO                              | 1 | 1 |   |
| OC[C@H](O)[C@H]1O[C@@H]2O[C@H](O[C@@H]1 |   |   | 0 |
| CC(C)c1c(C(=O)N)cc1                     | 0 |   |   |
| CC(O)C(=O)C                             | 0 | 0 | 0 |
| O=C1CNC(=O)N1                           |   |   | 0 |
| CCCNC(=O)N1N=C(c2ccc(N)cc2)C1           | 0 |   |   |
| CCNC(=O)N1                              | 1 |   | 0 |
| CCN(CC)c1nc1                            | 0 |   |   |
| COc1ccc(CNCC(O)COc2ccc3nc(O)ccc3c2)cc1  | 0 |   |   |
| CCCC(C)c1ccccc1O                        |   |   | 1 |
| O=C1CCCO1                               | 0 |   | 0 |
| CCN(CC)c1ccc(cc1)N=Nc2ccccc2            | 0 |   |   |

|                                              |   |   |   |
|----------------------------------------------|---|---|---|
| COc1ccc(cc1)C2=C(O)C(=O                      | 0 |   |   |
| CCc1cccc(C)c1N                               |   | 1 | 0 |
| OC(=O)Cc1ccc(cc1)N(=O)=O                     |   | 1 |   |
| CNCCN[S+](=O)([O-])c1ccc                     | 0 |   |   |
| CO\N=C(/C(=O)N[C@H]1[C@H]2SCC(=C(N2C1=O)C(=  |   |   | 0 |
| CC[C@H]1OC(=O)[C@H](C)C(=O)[C@H](C)[C@@H](C  |   |   | 0 |
| CCCC(=O)OCc1ccc(cc1)N(=O)=O                  |   | 1 |   |
| Cc1ncc(cn1)[C@@H](CCCCCc2ccc3CCCNc3n2)CC(=O) |   |   | 0 |
| CCNC(=O)N(                                   | 0 | 1 |   |
| CC(=O)N(N)C(=O)C                             |   |   | 0 |
| C[C@H]1OC(                                   | 0 | 0 |   |
| Clc1cc2c3cccc3ccc2c4cccc14                   |   | 1 |   |
| CC1=C(C(=O)C(C)(C)CC=C1                      |   |   | 0 |
| ClC1=C(Cl)C(=O)N(N=C1)S(=O)(=O)c2ccc         |   | 0 |   |
| CCC\C=C\C=O                                  |   | 1 | 0 |
| Oc1cc(Cl)c(O)cc1Cl                           |   | 0 |   |
| C\C=C/C=C\C(=O)O                             |   | 0 |   |
| O=C1CC2(CCCC2)CC(=O)N1CCCCN3CCN(CC3)c4ncccc4 |   |   | 0 |
| O=Nc1ccc(Nc2cccc2)cc1                        |   | 1 | 1 |
| NNc1nccc2cccnc12                             |   | 1 |   |
| CCCCCCC(=O)OCC                               |   | 0 |   |
| CC(=O)Nc1ccc(C)c(c1)N=[N+](O)c2ccc           |   | 0 |   |
| Clc1c(Cl)c(Cl)c(C=C)c(Cl)c1Cl                |   | 0 |   |
| COc1cccc(Br)c1                               |   |   | 0 |
| Clc1cccc(c1)C(c2ccc3nc[nH                    | 0 |   |   |
| CC(C)CCCC(C)C1CCC2\C(=C                      | 0 |   |   |
| CC(=O)\C(=C\C1C(=CCCC1(C)C)C)\C              |   |   | 0 |
| CCCCON(OC(=O)C)C(=O)c1ccc(cc1)[N+](          | 1 |   |   |
| CC(C)C(=O)OC(C)(CCC=C(C)C)C=C                |   |   | 0 |
| Cc1ccc(CC(Cc2nc3cccc3[n                      | 0 |   |   |
| Cc1cccc1c2oc3cccc3n2                         |   | 0 |   |
| ClCCCC(=O)\N=C\1/SN(C(=O)CCCCl)c2cc          |   | 0 |   |
| Cc1ccc(cc1N)N=[N+](O)c2ccc(C)c(N)c           | 1 |   |   |
| [O-][N+](=O)c1cc(cs1)C(=O)Nc2cccc2[          | 1 |   |   |
| CCN(CC)c1ccc(cc1)[N+]#N                      | 1 |   |   |
| CC12CCC3C(CCC4=CC(=O)CCC34)C1CCC2            | 0 |   |   |
| C(CC1CO1)C2CO2                               |   | 1 |   |
| Cc1ccc(cc1)N(CCO)CCO                         | 1 |   | 0 |
| Nc1nc(Nc2cc                                  | 0 |   |   |
| CC[C@@H]1'                                   | 0 | 0 |   |
| c1ccc2cccc2                                  | 0 | 0 | 0 |
| CC(=CCc1c(O)cc(O)c2C(=O                      | 0 |   |   |
| CC(C)(C)CNC(=O)\C=C\c1oc(cc1)[N+](=C         | 1 |   |   |

|                                                                                |   |   |   |   |   |
|--------------------------------------------------------------------------------|---|---|---|---|---|
| ClCC(Cl)C(=C)Cl                                                                |   |   |   | 1 |   |
| CCCNc1c(C(=O)O)c(Cl)ccc1[N+](=O)[O-]                                           |   |   |   | 0 |   |
| C[C@@H]1CC2=C(CCC(=O)C2)[C@H]3CC[C@@]4(C)[C@H](O=C(CCNNC(=O)N)C(=O)N)C(=O)N3C4 | 0 | 0 | 1 | 0 | 1 |
| CC(=O)Nc1ccc(C)cc1                                                             |   |   |   | 1 |   |
| CC(Cc1cccc1)NCC(O)c2ccc(O)c(c2)C(=O)N                                          | 0 |   |   | 0 | 0 |
| CCCC(=O)OCc1cccc(c1)[N+](=O)[O-]                                               |   |   |   | 0 |   |
| CN(C)C(=O)CC(=O)C                                                              |   |   |   |   | 0 |
| [O-][N+](=O)C                                                                  | 0 | 0 |   | 0 |   |
| N[C@@H](Cl)C                                                                   | 0 | 0 |   |   |   |
| CC(C)COC(=O)C=Cc1cccc1                                                         |   |   |   |   | 0 |
| Cc1ccc(cc1)C2CO2                                                               |   |   |   | 1 |   |
| CC(C)NCC(O)C                                                                   | 0 | 0 |   |   | 0 |
| CC(C)(C)NC(=O)[C@@H]1C[C@@H]2CCCC[C@@H]2C(=O)N1                                |   |   |   |   | 1 |
| COC(=O)Nc1nc2ccc(Sc3cccc3)cc2[nH]1                                             |   |   |   |   | 1 |
| CC(O)c1cccc1                                                                   |   |   |   | 0 | 0 |
| COc1ccc(c(OC)c1)S(=O)(=O)N2C(=O)[C@](N3C[C@H](O)N3)C(=O)N2                     |   |   |   |   | 0 |
| CC(C)CCCCCOC(=O)CCCC(=O)OCCCCCCCC(C)C                                          |   |   |   |   | 0 |
| CCCCCCCCCCCCc1cccc1                                                            |   |   |   |   | 0 |
| Cc1onc(NC(=O)c2c(O)c3ccccc3)cc1                                                |   | 0 |   |   |   |
| CCCCCOC(=O)C(=C)C                                                              |   |   |   | 0 | 0 |
| CC(C)(O)c1ccc(cc1)C(C)(C)O                                                     |   |   |   |   | 0 |
| COc1ccc(N(CCCl)CCl)c2cc(oc12)N(=O)C                                            |   |   |   | 1 |   |
| CC(C)NCC(O)C                                                                   | 0 | 0 |   | 0 | 0 |
| [O-][N+](=O)c1ccc2c3ccccc3C(=O)c2c1                                            |   |   |   | 1 |   |
| Clc1nncc2cccnc12                                                               |   |   |   | 1 |   |
| CC[C@@]12CCCN3CCc4c([C@H]12)C(=O)N3                                            |   | 0 |   |   |   |
| CC(C)C(N)C(=O)O                                                                |   |   |   | 0 |   |
| Cc1ccc(N)c(c1)S(=O)(=O)O                                                       |   |   |   | 0 | 0 |
| CC(=O)Nc1cc2Cc3cccc3c2cc1O                                                     |   |   |   | 0 |   |
| CC1COc2c(N3CCN(C)CC3)c(F)c(C(=O)O)c12                                          |   |   |   | 1 |   |
| Cc1ccc(OP(=O)(Oc2ccc(C)cc2C)Oc3ccc(C)cc1)cc1                                   |   |   |   | 0 |   |
| COc1ccc(cc1)C(=O)N                                                             | 0 |   |   |   |   |
| [O-][N+](=O)c1cc(cs1)C(=O)Nc2ccc(F)cc2                                         |   |   |   | 1 |   |
| OC(=O)C=O                                                                      |   |   |   | 1 |   |
| NCC1CCC(N)C                                                                    | 0 | 0 |   |   |   |
| O1C=CC=Cc2c1c3cc4cccc4cc3c5cccc25                                              |   |   |   | 1 |   |
| Clc1ccc2ccc3cccc4ccc1c2c34                                                     |   |   |   | 1 |   |
| CC(C)(Br)C(Br)CCl                                                              |   |   |   | 0 |   |
| Cc1ccc(Cl)c(N)c1Cl                                                             |   |   |   |   | 0 |
| CCOP(=S)(OC)C                                                                  | 0 | 0 |   | 0 | 0 |
| CC[C@H](NC)C                                                                   | 0 | 0 |   |   | 0 |
| CC1(C)S[C@H](C)C1                                                              | 0 |   |   |   | 0 |

|                                                |   |   |   |   |   |
|------------------------------------------------|---|---|---|---|---|
| C[C@H]1C[C                                     | 0 | 0 |   |   |   |
| Nc1ccc2[nH]c3ccccc3c2c1[N+](=O)[O-]            |   |   | 1 |   |   |
| Nc1ccc(N)c2c(O)c3ccccc3c(O)c12                 |   |   | 1 |   |   |
| NC(=O)COc1c(F)cc(SCCN[§                        |   | 0 |   |   |   |
| CC1=C(CC(=O)O)c2cc(F)cc                        |   | 0 |   |   |   |
| CC1=C(Cl)C(=O)OC1O                             |   |   | 1 |   |   |
| OC(C#CCN1C                                     | 1 | 0 |   |   |   |
| CC1(C)CC(C(=O)NC(CO)C(O)CO)C(C)(C)[I           |   |   | 0 |   |   |
| CN1[C@@H]2CC(C[C@H]1                           |   | 0 |   |   |   |
| CNC(=O)NO                                      |   |   | 0 |   |   |
| Cc1ccc(cc1[N+](=O)[O-])C(=O)O                  |   |   | 1 |   |   |
| CC(=O)Oc1cc2CN(CCc2s1)C(C(=O)C3CC3)c4ccccc4F   |   |   |   | 0 |   |
| CCCCCCCC\C=C/CCCCCCCC(=O)OC[C@@H](O)[C@H]1     |   |   |   | 0 |   |
| Cc1ccc2C(=O)c3c(cccc3[N+](=O)[O-])C(:          |   |   | 1 |   |   |
| ClCCBr                                         |   |   | 1 | 0 |   |
| Oc1cccc2OC(=O)C(=Cc12)[C@@H]3CCc               |   |   | 0 |   |   |
| C[C@H](CCC(=O)O)[C@H]                          |   | 0 |   | 0 |   |
| CC(C)c1ccc2c(ccc3c(C)cccc23)c1                 |   |   | 0 |   |   |
| CC(=O)OCN=[N+](C)[O-]                          |   |   | 0 |   |   |
| OC(=O)COC(=O)Cc1cccc1                          |   | 0 |   |   | 0 |
| CCc1cc(ccn1)                                   | 0 | 0 | 0 | 0 |   |
| CC(=O)Nc1ccc(cc1)C(=O)\C=C\c2ccccc2            |   |   | 0 |   |   |
| OC(=O)CCC(=O)Nc1ccc(Cl)cc1                     |   |   | 0 |   |   |
| COC(=O)c1cc2OCOc2c3c4cccc(OC)c4cc(             |   |   | 1 |   |   |
| COC(=O)[C@@]1(C)[C@H](C)C[C@H]2[C@@H]3CCC      |   |   |   | 0 |   |
| CC(=O)ON(C(=O)C)[S+](=C                        |   | 0 |   |   |   |
| O=C1N(c2ccc                                    | 0 |   |   | 0 |   |
| OCc1c(O)c2C(=O)c3ccccc3C(=O)c2cc1O(            |   |   | 1 |   |   |
| CCN(CC)N=O                                     |   |   | 1 | 0 |   |
| C[C@H](CCC(=O)O)[C@H]                          |   | 0 |   |   |   |
| OC(=O)c1c(Cl)c(Cl)c(Cl)c2Oc3c(Br)c(O)c         |   |   | 0 |   |   |
| CCC1(O)CC2C                                    | 0 | 1 |   |   |   |
| OS(=O)(=O)C(F)(F)F                             |   |   |   | 0 |   |
| OCc1ccccn1                                     | 0 | 0 |   | 0 |   |
| CCCC=C                                         |   |   |   | 0 |   |
| CCN(CC(=C)C)c1c(cc(cc1N(=O)=O)C(F)(F)F)N(=O)=O |   |   |   | 1 |   |
| CCOC(=O)Cc1cccc1                               |   |   |   | 0 |   |
| OC(=O)c1oc(c(c2ccccc2)c1c3ccccc3)[N+           |   |   | 1 |   |   |
| NC(CS)C(=O)NCC(=O)O                            |   |   | 1 |   |   |
| COc1ccc(cc1)C2=COc3ccc(                        |   | 0 |   |   |   |
| O[C@H]1CO[C@@H]2[C@H](O)CO[C@H]12              |   |   |   | 0 |   |
| COc1ccc(cc1O)C2=CC(=O)c3c(O)cc(O[C@@H]4O[C@    |   |   |   | 0 |   |
| Oc1ccc(cc1)S(=O)(=O)O                          |   |   |   | 1 |   |

|                                                    |   |   |   |   |
|----------------------------------------------------|---|---|---|---|
| CCSCC[C@H](N)C(=O)O                                |   |   | 0 |   |
| Cc1nc(N)sc1CCN                                     |   | 0 |   |   |
| CC(C)(C)CC(C                                       | 0 | 0 | 0 | 1 |
| CC(=O)OCc1c2ccccc2c(C)c3ccccc13                    |   |   | 1 |   |
| C[N+](C)CCCCC1                                     |   |   |   | 0 |
| CCN(CC)C(=O)c1ccc(cc1)[C                           |   | 1 |   |   |
| CNc1cc(N[S+](=O)([O-])c2                           |   | 0 |   |   |
| C[N+](C)(C)C                                       | 0 | 0 |   |   |
| CC(C)C(=O)OCC=Cc1ccccc1                            |   |   |   | 0 |
| C[N+](C)(C)C                                       | 0 | 0 |   | 0 |
| C1Cc2cc3ccc4cccc5ccc(c2C=C1)c3c45                  |   |   | 1 |   |
| COc1cc(cc(OC)c1O)[C@H]2[C@@H]3C(COC3=O)C(O[        |   |   |   | 0 |
| c1ccc2c(c1)c3cccc4cc5ccccc5c2c34                   |   |   | 1 |   |
| CCOC(=O)O[C@@H]([C@@H]1C[C@@H]2CCN1C[C@            |   |   |   | 0 |
| COc1cc(N[S+](=O)([O-])c2                           |   | 0 |   |   |
| OS(=O)(=O)CNc1ccc(cc1)N=Nc2ccccc2                  |   |   | 0 |   |
| C[C@@H](COc1ccccc1)N(                              |   | 0 |   |   |
| Cc1ccccc1\C=C\C2=NCCN2                             |   | 0 |   |   |
| COc1ccc(cc1)                                       | 0 | 0 |   | 0 |
| OCCn1c(CO)ncc1N(=O)=O                              |   |   | 1 |   |
| CCN(N=O)\C(=N\O)\C=O                               |   |   | 1 |   |
| CCN(CC)C(=O)C(C)Oc1cccc2ccccc12                    |   |   |   | 0 |
| C[n+](C)CCCC2C3OC3C=Cc12                           |   |   | 1 |   |
| BrCCCCBr                                           |   |   | 1 | 0 |
| C1c2ccccc2c3ccc4ccc5ccccc5c4c13                    |   |   | 1 |   |
| C[C@@]12C3CCC(O3)[C@]1(C)C(=O)OC2=O                |   |   |   | 1 |
| Nc1ccc(NCCO)c(c1)N(=O)=O                           |   |   | 1 | 1 |
| [O-][N+](=O)c1oc(C(=O)CBr)c(Cl)c1Cl                |   |   | 1 |   |
| CC(C)(c1cc(Br)c(OCC=C)c(Br)c1)c2cc(Br)c(OCC=C)c(Br |   |   |   | 0 |
| CC(C)(COC(=O)C=C)COC(=O)C=C                        |   |   | 0 |   |
| Cc1ccc(C=C)cc1                                     |   |   | 0 | 0 |
| OC1C(O)C(OC(C1O)C(=O)O)N(O)c2ccc(c                 |   |   | 1 |   |
| CC1=C(CC=O)C(C)(C)CCC1                             |   |   |   | 0 |
| COc1ccc(C(=                                        | 0 | 0 |   | 0 |
| CC(C)c1ccc2c(cc(C(C)C)c(c2c1)S(=O)(=O)[O-])C(C)C   |   |   |   | 0 |
| COC[C@H](O)Cn1ccnc1[N+](=O)[O-]                    |   |   | 1 |   |
| CC(=O)C(N=Nc1ccc(cc1Cl)c2ccc(N=NC(C                |   |   | 0 |   |
| CCC(O)OC(O)CC                                      |   |   |   | 0 |
| CC(C)(O)CCC(C)(C)O                                 |   |   |   | 0 |
| CN1CCN(CC(-                                        | 0 | 0 |   | 0 |
| CC1CCCCN1N=O                                       |   |   | 1 |   |
| Nc1ccc2c(Cc3cc(ccc23)N(=O)=O)c1                    |   |   | 1 |   |
| Cc1ccccc1O)C(C)(C)C                                |   |   |   | 0 |

|                                                 |   |   |   |
|-------------------------------------------------|---|---|---|
| CN1C(=O)N(                                      | 0 | 0 | 0 |
| CO[C@@H]1[C@@H](C[C@H]2CN3CCc4c                 |   |   | 0 |
| O=NN1CCNC1=O                                    |   |   | 1 |
| Clc1ccc([C@@H]2CS\C(=C(\C#N)/n3ccnc3)\S2)c(Cl)c |   |   | 0 |
| OC\C=C\c1cc                                     | 0 | 0 | 0 |
| OC(=O)[C@                                       | 0 | 0 |   |
| CC(=O)Nc1ccc(cc1)[N+](=O)[O-]                   |   |   | 0 |
| Nc1nnc(c(N)n1)c2cccc(Cl)c                       |   | 0 |   |
| Clc1ccc(CCC2CO2)cc1                             |   |   | 1 |
| Cc1c(C)c(N)ccc1N                                |   |   | 0 |
| CCOc1ccc2cc                                     | 0 | 0 |   |
| CCOC(=O)OCC                                     |   |   | 0 |
| CC(=O)OCc1cocc2c(C=O)ccc12                      |   |   | 1 |
| CCC(CCC(=O)C)COC(=O)CCCC(=O)O                   |   |   | 0 |
| CC[C@@H]1NC(=O)c2cc(c(Cl)cc2N1)S(=              |   |   | 0 |
| NC(CCC(=O)NNc1ccccc1)C(=O)O                     |   |   | 1 |
| O1[C@@H]2[C@H]1c3cccc4ccc5cc6ccc                |   |   | 1 |
| CC(CN=N#N)c1ccccc1                              |   |   | 1 |
| C\C=C\C=C\CO                                    |   |   | 0 |
| OC(=O)CNC(                                      | 0 | 0 | 0 |
| OCc1c2cccc2c(COS(=O)(=O)O)c3ccc4cc              |   |   | 1 |
| CC(O)CN1CC(C)OC1=O                              |   |   | 0 |
| CNCCN(Cc1ccc(OC)cc1)c2cccn2                     |   |   | 0 |
| CC1O[C@@H](O[C@@H]z                             |   | 1 |   |
| Nc1cc(c2cccc(c2c1)S(=O)(=O)O)S(=O)(=            |   |   | 0 |
| CN(CCOc1ccc                                     | 0 | 0 | 1 |
| CC(C)CC=C(C=O)c1ccccc1                          |   |   | 1 |
| CN(C)C(=O)C                                     | 0 | 0 |   |
| ON(C=O)c1ccc(Cl)c(Cl)c1                         |   |   | 0 |
| Nc1cccc2nc3cccc(N)c3nc12                        |   |   | 0 |
| Sc1nc2cccc2[nH]1                                |   |   | 0 |
| CN(C)c1ccc(\C=C\C=O)cc1                         |   |   | 0 |
| Cl\C=C(/Cl)\C(Cl)Cl                             |   |   | 1 |
| OC(=O)c1ccc2c3nc4cccc4                          |   | 0 |   |
| CCNc1nc(Cl)r                                    | 0 | 0 | 0 |
| Oc1cccc(Cl)c1                                   |   |   | 0 |
| CC[C@]1(O)(                                     | 0 | 0 |   |
| OC1C=Cc2c(ccc3c4CCC(=O)c4cc(c23)C(F             |   |   | 1 |
| C[N+](C)(C)C                                    |   |   | 0 |
| Oc1ccc(cc1[N+](=O)[O-])c2cccc(c2)[N+]           |   |   | 1 |
| CNCC\C=C\c1cccnc1                               |   | 0 |   |
| OCC(Cl)CCl                                      |   |   | 1 |
| C[C@H]1O[C@H](C[C@H](O)[C@@H]1O[C@H]2C[C@       |   |   | 1 |



|                                              |   |   |   |
|----------------------------------------------|---|---|---|
| COc1cc(NS(=O)(=O)C)ccc1Nc2c3ccccc3r          | 1 |   |   |
| Cc1c(c2ccccc2c3ccc4ccccc4c13)N(=O)=C         | 1 |   |   |
| CC1=C(CCN2CCC(=C(c3cccc                      | 1 |   |   |
| NC1=NC(=O)N(C=C1)[C@H]                       | 0 |   |   |
| Nc1ccc(CO)c(c1)N(=O)=O                       | 1 |   |   |
| CC1(C)S[C@@H]2[C@H](NC(=O)[C@H](N)c3ccc(O)cc | 0 |   |   |
| CIS(=O)(=O)Cl                                | 0 |   |   |
| NNC(=O)c1[nH]c2ccccc2c1N                     | 1 |   |   |
| C[C@H]1CC2                                   | 0 |   |   |
| CN1C=CC(=C(C#N)C1=O)O                        | 0 |   |   |
| CN(C)Nc1nc(cs1)c2oc(cc2)[N+](=O)[O-]         | 1 |   |   |
| NCCNC(=O)c:                                  | 0 | 0 |   |
| CN(C)\C=N\c                                  | 0 | 0 |   |
| CCC1=C(C)CN(C(=O)NCCc2                       | 0 |   |   |
| ClC(Cl)C(=O)C(Cl)(Cl)Cl                      | 1 |   |   |
| C[N+]1(C)CC                                  | 0 | 0 |   |
| Cc1ccc(cc1)C(=O)Cl                           | 1 |   |   |
| OC(=O)CCCCCCCCC(=O)O                         | 0 |   |   |
| COc1ccc(N)c(OC)c1                            | 1 |   |   |
| Oc1ccccc1C=O                                 | 0 | 0 |   |
| CN1[C@@H](CSCC(F)(F)F)Nc2cc(Cl)c(cc          | 0 |   |   |
| CCCCN=NC(C)(C)OO                             | 1 |   |   |
| CC(C)(C)CC(C                                 | 0 | 0 | 1 |
| OCc1ccc(cc1[N+](=O)[O-])[N+](=O)[O-]         | 1 |   |   |
| C[C@@H](CN1c2ccccc2Sc3ccccc13)N(C            | 0 |   |   |
| CC(=O)Nc1ccc(c2cc(c(N=Nc3ccc(N=Nc4           | 0 |   |   |
| Cc1cc(ccc1N)C(=C2C=CC(N)C=C2)c3ccc(I         | 1 |   |   |
| CCC(Cc1c(I)c                                 | 0 | 0 |   |
| Oc1cc2CC3(O)COc4c(O)c(O)ccc4C3c2cc:          | 0 |   |   |
| Oc1ccc(cc1)C(=C(Cl)Cl)c2ccc(O)cc2            | 1 |   |   |
| OCCOCCN1C                                    | 1 | 0 |   |
| CN(C)CCOC(c                                  | 1 | 0 | 0 |
| Oc1ccc2c3ccc(O)c4C(=O)C=C[C@@](O)            | 1 |   |   |
| [O-][N+](=O)c1cccc(NC(=O)c2csc(c2)[N         | 1 |   |   |
| c1cnc2c(c1)ccc3ncccc23                       | 1 |   |   |
| O=C1NNc2ccccc12                              | 0 |   |   |
| COc1ccc2ncccc([C@@H](O)[C@@H]3C(C            | 0 | 0 |   |
| Clc1cc(Cl)cc(NS(=O)(=O)c2ccccc3ccnc23        | 0 |   |   |
| OC1C(O)c2ccc3c4CCc4ccc3c2C5OC15              | 1 |   |   |
| COC(=O)\C(=C/CO)\C=C(/C)\C=C(/C)\C=          | 1 |   |   |
| Cn1ccnc1[N+](=O)[O-]                         | 1 |   |   |
| CC1(C)SC2C(I                                 | 0 | 0 |   |
| Cn1c(N)nc2cc(O)ccc12                         | 0 |   |   |

|                                               |   |   |
|-----------------------------------------------|---|---|
| C\C=C(\C=C/C)\c1ccc(O)c                       | 0 |   |
| COc1ccc(cc1)                                  | 0 | 0 |
| Oc1cc2OCOc2cc1N=O                             |   | 1 |
| COc1nsc2cc(ccc12)[N+](=O)[O-]                 |   | 1 |
| COc1ccc(CC2c3cc(OC)c(OC)cc3CC[N+](C)CCC(=O)OC |   | 0 |
| OS(=O)(=O)c1cccc2cccnc12                      |   | 0 |
| Nc1ncnc2c1ncn2C3CCC(CO)O3                     |   | 1 |
| COC1CC(O[C                                    | 0 | 0 |
| C[C@H](Cc1ccc(O)c(O)c1)                       | 0 | 1 |
| CCCN1CCCC[C@H]1C(=O)N                         | 0 |   |
| C[S+](=O)([O-])Nc1ccc(Cc                      | 0 |   |
| O=CN1CC2CC(C1)C3=CC=C                         | 0 |   |
| O=S(=O)(N1                                    | 0 |   |
| Oc1ccc(CC(C#N)c2ccc(O)c                       | 0 |   |
| COc1ccc(C(=O)c2ccc(OC)cc2O)c(O)c1             |   | 1 |
| OC(=O)c1cc2OCOc2c3c4cccc(O)c4cc(c1:           | 1 |   |
| Cc1c(NO)cc(NO)cc1[N+](=O)[O-]                 | 1 |   |
| NCC(CC(=O)C                                   | 0 | 0 |
| CCCc1nc2c(C                                   | 0 | 0 |
| OS(=O)(=O)c1cccc2C(=O)c3c(cccc3N(=C           | 1 |   |
| Cn1c2cccc2c3cc(N)ccc13                        | 1 |   |
| Cc1ccc2nc(N                                   | 0 | 0 |
| CCCCCCCCCCCC[n+](c1cccc1                      |   | 1 |
| CC(=O)c1ccc2OC(C)(C)[C@H](O)[C@@H](NC(=O)c3cc |   | 0 |
| O=NN1CCCCCCC1                                 | 1 | 0 |
| C1NCc2cccc2C1c3cccc3                          | 0 |   |
| CNC(=O)CSP(=S)(OC)OC                          | 1 | 0 |
| CN(C(=O)C)c1ccc(cc1)N=Nc2ccc(cc2)N(           | 0 |   |
| O[C@H]1[C@                                    | 0 | 0 |
| COC(=O)\C=C\c1cc(O)ccc1                       | 0 |   |
| CCCCNC(=O)N[S+](=O)([O                        | 0 |   |
| CC(C)CCCCOC(=O)CCCC(=O)OCCCCC(C)C             |   | 0 |
| OCC1NC(Cc2c1[nH]c3cccc23)C(=O)O               | 0 |   |
| C[N+](C)(C)NCCC(=O)O                          | 0 |   |
| OC[C@H]1O[C@H]([C@H]                          | 0 |   |
| CN(Cc1cccc1)C(=O)CBr                          | 0 |   |
| Clc1cccc2C(=O)c3c(NC(=O)c4cccc4)ccc           | 1 |   |
| CCC1OC(OC(                                    | 0 | 0 |
| Cc1onc(c2ccc                                  | 0 |   |
| CC(=O)N1CNC(=O)N(C(=O)C)C1=O                  | 0 |   |
| CNC1C(O)C(O)C(CO)OC1OC2C(OC3C(O)              | 1 |   |
| Cn1cc(CC2(O)C(=O)CC3C(O)COC23O)c4c            | 1 |   |
| O=N(=O)OCC(CON(=O)=O)(CON(=O)=O               | 0 | 0 |

|                                                |   |   |   |
|------------------------------------------------|---|---|---|
| NC(=O)OCC(O)COc1ccc(Cl)cc1                     |   |   | 0 |
| OC(=O)CCCCCC(=O)O                              |   |   | 0 |
| COC(=O)Cc1cccc2ccccc12                         |   |   | 0 |
| COCC(O)Cn1cc(nc1Cl)[N+](=O)[O-]                | 1 |   |   |
| OC(=O)\C=C\c1ccc(cc1)[N+](=O)[O-]              | 1 |   |   |
| COC(=O)CCc1                                    | 0 | 0 |   |
| CC(=O)NCCc1ccc(O)c(c1)c2c(O)c(O)c3C            | 0 |   |   |
| NC(CSCC(=O)                                    | 0 | 0 | 0 |
| CC(Cl)C(=O)O                                   | 0 |   | 0 |
| CN(C)CCC=C1c2ccccc2C(C)                        | 1 |   |   |
| CC1C2CC(CC2C3CCCC(O)C3)C1(C)C                  |   |   | 1 |
| CCCCN(CCCC)CCCC                                | 0 |   | 0 |
| [O-][N+](=O)c1ccc2c(oc3ccccc23)c1              | 1 |   |   |
| CCCCCCCC\C=C/CCCCCCCC(=O)OCC                   |   |   | 0 |
| CC(Cl)CN(C)C                                   | 1 |   |   |
| Clc1sc(Cl)c(Cl)c1Cl                            |   |   | 0 |
| Clc1ccc(C=NN2N=Nc3c([nH]c4ccccc34)C            | 1 |   |   |
| Cc1cc(Cl)cc2S\C=C\3/Sc4cc(Cl)cc(C)c4C          | 0 |   |   |
| Clc1cc2Oc3ccc(cc3Oc2cc1Cl)N(=O)=O              | 1 |   |   |
| CC(C)CCCCCCCOP(OCCCCCCCC(C)C)Oc1ccccc1         |   |   | 0 |
| CCCCCCCC[N+](CCCCCCCC)(CCCCCCCC)CCCCCCCC       |   |   | 1 |
| CCC(C)O                                        |   |   | 0 |
| OC(=O)C1=NN(C(=O)C1N=Nc2ccc(cc2)S              | 0 |   |   |
| OCC(CO)N[C@H]1C[C@](O)(CO)[C@@H](O)[C@H](C     |   |   | 0 |
| Oc1ccc(cc1N(=O)=O)N(=O)=O                      | 0 |   | 1 |
| CC(C)(O)C1C:                                   | 0 | 0 |   |
| C[C@]12C[C@H](O)[C@H]3[C@@H](CC                | 0 |   | 0 |
| CN1N(C(=O)C(=C1C)N)c2ccccc2                    | 0 |   | 0 |
| CN(C1CCCCC:                                    | 0 | 0 | 0 |
| COc1cc(Cl)c(OC)cc1Cl                           | 1 |   |   |
| CC1CCC(CO)CC1                                  |   |   | 0 |
| C=CCSSCC=C                                     |   |   | 0 |
| CC(=O)c1ccccc1O                                |   |   | 0 |
| CCOC(=O)[C@@H](C)Oc1ccc(Oc2oc3cc(Cl)ccc3n2)cc1 |   |   | 0 |
| NC(=O)OCC1C(NC(=O)\C(=N/OCC(=O)O               | 0 |   |   |
| COC(=O)C1=C(C)NC(=C([C(                        | 1 |   |   |
| OCC(O)C(O)CO                                   |   |   | 0 |
| Clc1ccc(cc1)†                                  | 1 |   |   |
| CNC(=O)c1ccccc1                                | 0 |   | 0 |
| COc1cc2C3CC[C@]4(C)[C@                         | 1 |   |   |
| CCCCCC[C@@H](CCC)C(=O)O                        |   |   | 0 |
| CCCCCCCCCCCCC(=O)[N-][N+](C)(C)CC(             | 0 |   |   |
| OCC1CCC=CC1                                    |   |   | 0 |

|                                              |   |
|----------------------------------------------|---|
| CCN1CCN(C=O)N[C@@H](C=O)N[C@H]2[C@H]3SC      | 0 |
| Nc1ccc(cc1N)[N+](=O)[O-]                     | 1 |
| CC1(C)OC[C@@H]2O[C@]3(OC(C)(C)O[C@H]3[C@@    | 0 |
| COc1cccc2c(O)c3c(O)c4CC(O)(CC(=O)c4          | 1 |
| OC(=O)CC(NC(=O)COc1ccc(Cl)cc1Cl)C(=          | 0 |
| NC(=O)Cc1cccc2cccc12                         | 1 |
| CCC\C=C\C=C\C(=O)OC1\C                       | 0 |
| CC(=O)SCC(CC(=O)c1ccc(C)cc1)C(=O)O           | 0 |
| Nc1ccc2[nH]c3cccc3c2c1N(=O)=O                | 1 |
| C(Oc1cccc2cccc12)C3CO3                       | 1 |
| BrCC(=O)c1ccc(cc1)c2cccc2                    | 1 |
| CC(=O)c1ccc(s1)[N+](=O)[O-]                  | 1 |
| Cc1ncc[nH]1                                  | 0 |
| CC(C)C[C@H](NC(=O)[C@@H](COC(C)(C)C)NC(=O)[C | 0 |
| CN(CCC#N)c1ccc(cc1)N=Nc2ccc3ncsc3c           | 1 |
| BrC1c2cccc2cc3c1ccc4cccc34                   | 1 |
| ClCc1ccc2c3cccc4cccc(c2c1)c34                | 1 |
| NC1=NC(=O)N(C=N1)C2C[                        | 0 |
| CCCCC(CC)C(=O)OCCOCCOCCOCCOC(=O)C(CC)CCCC    | 0 |
| CC12CCC(=O)C=C1C3CC3C4C2CCC5(C)C4            | 0 |
| CCCN1C(=O)I                                  | 0 |
| [O-][N+](=O)c1ccc(cc1)c2cccc2                | 1 |
| Cc1cc(Cc2ccc(N)c(C)c2)ccc1N                  | 1 |
| CCOC(=O)C(N)\C=C(/C)\CF                      | 0 |
| CCCCC(CC)COCCO                               | 0 |
| COc1ccc(CCl)cc1                              | 0 |
| NC(=O)c1[nH]cnc1[N+]#N                       | 1 |
| [O-][N+](=O)c1ccc(cc1)c2ccc(cc2[N+](=        | 1 |
| CO\N=C(/C(=                                  | 0 |
| O=C1NC=Nc2                                   | 0 |
| OC(=O)C1Cc2c(CN1)[nH]c3cccc23                | 0 |
| C[C@]12CC[C@H]3[C@@I                         | 1 |
| NC(Cc1ccc(F)cc1)C(=O)O                       | 0 |
| CC(N)C(=O)O                                  | 0 |
| CC1(C)O[C@H]2CC(=O)OC[C@]23[C@H]4CC[C@@]5(   | 0 |
| CC(=O)OCC(=                                  | 0 |
| CNC(=O)Oc1cccc(c1)\N=C\N(C)C                 | 0 |
| CCCCCCCCCCCC[C@H](I                          | 0 |
| OC[C@H]1O                                    | 0 |
| CC(=Nc1ccc(Nc2ccc(cc2)N(=O)=O)cc1)C          | 1 |
| CN(C)c1ccc2nc(C)c(C)nc2c1C                   | 1 |
| OCCN(CCO)N=O                                 | 1 |
| CO[C@H]1C[                                   | 0 |

|                                              |   |   |   |
|----------------------------------------------|---|---|---|
| CN(C)S(=O)(=O)c1cccc(c1)S(=O)(=O)[O-]        | 0 | 0 | 0 |
| NCCCC[C@H]                                   | 0 | 0 |   |
| [O-]S(=O)(=O)c1cccc(c1)S(=O)(=O)[O-]         |   |   | 0 |
| C1CN=C(N1)c2ccc3ccccc3c2                     |   |   | 0 |
| CC(C)[C@@H]1N2C(=O)[C                        |   | 0 |   |
| C[C@H]1C[C@H]2[C@@H]3CCC4=CC(=O)C=C[C@]4(C   |   |   | 0 |
| S=C1[N-]C(=S)[N-]C(=S)[N-]1                  |   |   | 0 |
| C[C@]12CCC                                   | 0 | 1 |   |
| CCCCCCCC(=O)Cl                               |   |   | 1 |
| C\C=C/1\NN                                   | 1 | 1 |   |
| CCN(CC)CCOC(=O)c1ccc(N)cc1Cl                 |   |   | 0 |
| COP(=O)(OC)C(OC(=O)CCl)C(Cl)(Cl)Cl           |   |   | 0 |
| CCN(CC)C(=S)SSCC(NC(=O)CCC(N)C(=O)           |   |   | 0 |
| Cc1ccc2cc3c4C(O)C(O)C=Cc4ccc3c5CCc1          |   |   | 1 |
| Cn1c2ccccc2c3cc(ccc13)[N+](=O)[O-]           |   |   | 1 |
| O=C1[N-]C(=O)c2ccccc12                       |   |   | 0 |
| CCCCNC(=O)n1c(NC(=O)OC)nc2ccccc12            |   |   | 0 |
| C[C@H](Cc1c                                  | 0 | 0 |   |
| Cc1ccc(cc1)S                                 | 0 | 0 |   |
| OC(=O)C(=C)Br                                |   |   | 0 |
| CN1C=C(C(=O)C(=C1)c2ccccc2)C(F)(F)F)c3ccccc3 |   |   | 0 |
| CCc1ccc(cc1)C(C(Cl)Cl)c2ccc(CC)cc2           |   | 1 | 1 |
| OC(=O)c1ccccc1C(c2ccc(O)cc2)c3ccc(O)cc3      |   |   | 0 |
| CCCC(CCC)C(=O)N                              |   |   | 0 |
| COc1cc(CCN)                                  | 0 |   |   |
| CN(C)CCOC(=                                  | 0 | 0 |   |
| NC(CCP(=O)(                                  | 0 | 0 |   |
| CC12CCC3C(CCc4cc(O)ccc34)C1CCC2(O)(          |   |   | 0 |
| ON=C1CCCC1                                   |   |   | 0 |
| OC(=O)C1=C(                                  | 0 | 0 |   |
| C=CCOC(=O)c1ccccc1C(=O)OCC=C                 |   |   | 0 |
| CC(C)Oc1ccc(Nc2ccccc2)cc1                    |   |   | 0 |
| N[C@@H](C                                    | 0 | 0 |   |
| COP(=S)(OC)SCN1N=Nc2ccccc2C1=O               |   |   | 1 |
| Cc1cc2C(=O)[C@@H](O)Cc2c3ccc4ccccc           |   |   | 1 |
| CN(C)c1ccc(\C=C\C(=O)c2ccccc2)cc1            |   |   | 0 |
| NC(=O)C(Cl)Cl                                |   |   | 0 |
| OCCN1CC(O)                                   | 0 | 0 |   |
| CC(Cc1ccccc1)NCCn2cnc3N(C)C(=O)N(C)C(=O)c23  |   |   | 0 |
| O=C(Oc1ccccc1)c2ccccc2)C(=O)Oc3ccccc3        |   |   | 0 |
| Cc1ccc(c(c1)C(=O)O)[N+](=O)[O-]              |   |   | 1 |
| CC1(C)N=C(N)N=C(N)N1c2ccc(Cl)cc2             |   |   | 0 |
| CN1CCN(CC1                                   | 0 | 0 |   |

|                                               |   |   |   |
|-----------------------------------------------|---|---|---|
| O[C@H]1C[C@@](O)(C[C(                         | 0 |   |   |
| CC(=O)c1cccc1[N+](=O)[O-]                     |   | 0 |   |
| CC(C)c1ccc(cc1)C#N                            |   |   | 0 |
| CCOC(=O)c1ccc(NC(=O)CN2CCCC2)cc1              |   |   | 0 |
| C[C@H](CS)[C@@H]1CC[C@@H](C)[C@               | 0 |   |   |
| CCCCN1CCC(CCC(=O)c2cc(                        | 1 |   |   |
| OC(=O)CCCC                                    | 0 | 0 | 0 |
| Cc1ccc(NN=NCc2ccc(cc2)[N+](=O)[O-])           |   | 1 |   |
| COP1(=S)OCc2ccccc2O1                          |   | 1 |   |
| ClCc1cccc2cc3ccc4cccc5ccc(c12)c3c45           |   | 1 |   |
| COc1ccc2Oc3cc(OC)cc(O)c3C(=O)c2c1             |   | 1 |   |
| C[C@H](CCC(=O)[O-])[C@H]1CC[C@H]2[C@@H]3[C@   |   |   | 0 |
| NCCCN                                         |   | 0 |   |
| NCCc1cc[nH]                                   | 0 | 0 | 0 |
| COc1cccc1N                                    | 0 | 0 | 0 |
| CO\N=C(/C(=O)N[C@H]1[C@H]2SCC(=C(N2C1=O)C(=   |   |   | 0 |
| CC(C)NC(=NC(C)C)OCc1ccc(cc1)N(=O)=C           |   | 1 |   |
| OCC(O)C(O)C(O)C(O)CN=N#N                      |   | 1 |   |
| CCCCOCCOP(=O)(OCCOCCCC)OCCOCCCC               |   | 0 | 0 |
| Oc1c(Br)c2ccccc2nc1C3C(=O)c4ccccc4C3=O        |   |   | 1 |
| CC(Cl)C(=C)C                                  |   | 1 |   |
| OC(=O)COc1                                    | 0 | 0 | 0 |
| Oc1ccc(cc1)C(c2ccc(O)cc2)C(Cl)(Cl)Cl          |   |   | 1 |
| Cc1onc(O)c1                                   | 0 | 0 |   |
| CN(C)CCO[C@@](C)(c1cccc1)c2cccn2              |   | 0 |   |
| O=NN1CN2CN(CN(C2)N=O)C1                       |   | 1 |   |
| [O-][N+](=O)C(Cl)Cl                           |   | 1 |   |
| O=C1NC(=O)\C(=C\c2ccc3                        |   | 0 |   |
| C(Oc1cccc1c2ccccc2)C3CO3                      |   | 1 |   |
| CCCCON(OC(=O)C)C(=O)c1ccc(Cl)cc1              |   | 1 |   |
| CCOC(=O)C1=C[C@@H](OC(CC)C)[C@H](NC(=O)C)[    |   |   | 0 |
| CC(=O)Nc1ccc(Oc2ccc(cc2)N(OC(=O)C)            |   | 1 |   |
| Nc1ccc(cc1[N+](=O)[O-])c2ccc(N)c(c2)[         |   | 1 |   |
| OC1C=Cc2ccc3nc4ccc5ccccc5c4cc3c2C1            |   | 1 |   |
| COCCOc1cc2cc(C(=O)NC3CCN(CC3)C(C)C)n(CC(=O)Nc |   |   | 0 |
| COc1ccc2[nH                                   | 0 | 0 |   |
| CCCCC1CCC(=O)O1                               |   |   | 0 |
| CN(C)c1ccc(N=Nc2ccncc2)c(NC(=O)C)c1           |   | 0 |   |
| CC(CON(=O)=O)(CON(=O)=O)CON(=O)=              |   | 0 |   |
| CC(=O)OCc1c(O)cc2C(=O)c3ccccc3C(=O)           |   | 1 |   |
| NC(C(=O)O)c1ccc(C(=O)O)                       |   | 0 |   |
| C[S+](=O)([O-])Nc1ccc(cc1                     |   | 0 |   |
| OC(Cc1ccncc                                   | 0 | 0 | 0 |

|                                                |   |   |   |   |
|------------------------------------------------|---|---|---|---|
| CSCCI                                          |   |   | 1 |   |
| NC1CC(=CC=C                                    | 0 | 0 |   |   |
| C[C@@H]1O                                      | 1 |   |   | 1 |
| OCC1OC(Oc2cc(O)cc3Oc4c(O)ccc(O)c4C             |   |   | 1 |   |
| CC(C)[C@@H]1CC[C@H](C)[C@@H]2CC                |   |   | 1 |   |
| OCCC#N                                         |   |   | 0 |   |
| CCCN(CCC)c1c(cc(c(N)c1N(=O)=O)C(F)(F)F)N(=O)=O |   |   |   | 1 |
| CC(C)CCCC(C)C1CCC2C3CC=C4CC(CCC4(C             |   |   | 0 |   |
| Nc1ccc2nc3cccn3c2n1                            |   |   | 1 |   |
| CC1CNC(=O)N1c2ncc(s2)[N+](=O)[O-]              |   |   | 1 |   |
| CC1=CN(C2CC(O)C(CO)O2)C(=O)NC1=O               |   |   | 0 |   |
| CC(=O)OC1(CCC2C3C=C(Cl)C4=CC(=O)OC             |   |   | 0 |   |
| CC(C)(Oc1ccc                                   | 0 | 0 | 0 | 0 |
| Cc1ccc(c(O)c1)C(C)(C)C                         |   |   |   | 1 |
| CCCCC(CC)COP(=O)(OCC(CC)CCCC)OCC(C             |   |   | 0 | 0 |
| COc1ccc(cc1)C(=O)Nc2ccccc2CCC3CCCCN3C          |   |   |   | 0 |
| COc1cc(\C=C                                    | 1 | 0 |   |   |
| COc1cccc2C(=O)c3c(O)c4CC(O)(CC(OC5(            |   |   | 1 |   |
| Oc1cc(O)c2ccccc2n1                             |   |   | 1 |   |
| CC(=O)OCN(CCCI)N=O                             |   |   | 1 |   |
| CN(C)C(=O)Oc1cc(C)n(n1)C(=O)N(C)C              |   |   |   | 0 |
| ClC(=O)c1cccc(c1)N(=O)=O                       |   |   | 1 | 0 |
| CCc1c2C3OC3c4ccccc4c2cc5ccccc15                |   |   | 1 |   |
| Brc1ccccc1                                     |   |   | 0 | 0 |
| CC(C)OC(=O)C(O)(CC(=O)O)CC(=O)O                |   |   |   | 0 |
| OC(=O)c1oc(cc1)[N+](=O)[O-]                    |   |   | 1 |   |
| O1C2C=Cc3c(ccc4c5C=Cc6ccccc(cc34)c56           |   |   | 1 |   |
| C[C@]12CC[C(                                   | 0 |   |   |   |
| CN(C)CCN(Cc1ccc(Cl)cc1)c2cccn2                 |   |   |   | 0 |
| CC(C)CC(C)N                                    |   |   | 0 | 0 |
| CC[C@H]1[C(                                    | 0 | 0 |   | 0 |
| OC[C@@H](O)[C@@H](O)[C@H](O)[C@H](O)CO         |   |   |   | 0 |
| CSc1nc(N)c2ncn([C@@H]:                         |   | 0 |   |   |
| COc1cc(F)ccc1[N+](=O)[O-]                      |   |   | 1 |   |
| COc1ccc2C=C(Oc3ccccc1c23)[N+](=O)[O-           |   |   | 1 |   |
| COC(COC(=O)N)C1=C(N2CC2)C(=O)C(=C              |   |   | 1 | 0 |
| CC(=O)CC(C)(C)NC(=O)C=C                        |   |   | 0 | 0 |
| Cc1ccccc1N=O                                   |   |   | 1 | 0 |
| Cc1ccc2OCC(=O)COc2c1                           |   |   |   | 0 |
| COC(=O)C1=C(C)NC(=C([C(                        |   | 0 |   |   |
| OCCN1CCN(CCS(=O)(=O)[O-])CC1                   |   |   |   | 0 |
| CN(N=O)c1c(                                    | 0 | 0 |   |   |
| Cc1c(N)cccc1Cl                                 |   |   | 0 | 0 |

|                                            |   |   |     |
|--------------------------------------------|---|---|-----|
| CC1(O)CCC2C3CCC4CC(=O)C(CC4(C)C3CC         | 0 |   |     |
| COc1ccc(N)c(c1)N(=O)=O                     |   |   | 0   |
| CCC(C)C=O                                  | 0 |   | 0   |
| c1ccc2c(c1)ccc3c2ccc4ccc5ccccc5c34         | 1 |   |     |
| C(CN1c2ccccc2                              | 1 | 1 |     |
| CN(C)CCC(c1ccc(Cl)cc1)c2c                  | 0 |   | 0   |
| COCC1CO1                                   |   |   | 1   |
| NC(=N)NCCN                                 | 0 | 0 | 0 0 |
| CC(C)CCCCOC(=O)c1ccccc1C(=O)OCCCC(C)C      |   |   | 0   |
| OC(=O)CCCCCCCCCCCCC                        |   | 0 |     |
| C=Cc1ccncc1                                |   |   | 0   |
| CCCc1ccc(N)cc1                             |   |   | 0   |
| C[C@]12CC[C@H]3[C@@H](CCC4=CC(=O)CC[C@H]34 |   |   | 0   |
| Clc1ccc(c(Cl)c1)C(Cl)(Cl)Cl                |   |   | 1   |
| CCCN(CCC)CC1CCCCN1CCN                      |   | 1 |     |
| CC(C)C(=O)OC(=O)C(C)C                      |   |   | 0   |
| ClCc1ccc2c3ccccc3c4ccccc1c24               |   |   | 1   |
| CCC(C)C1NC(=O)C(=C1O)C(=O)C                |   |   | 0   |
| C[C@]12C[C@                                | 0 | 0 | 0   |
| FC(F)(Cl)C(F)(Cl)Cl                        |   |   | 0   |
| Nc1c(O)ccc2ccccc12                         |   |   | 0   |
| [O-][N+](=O)C1=Cc2c3ccc4ccccc4c3cc5c       |   |   | 1   |
| BrC1ccc(Oc2ccc(Br)cc2Br)c(Br)c1            |   |   | 1   |
| CC(=N)NCc1c                                | 0 | 0 |     |
| [O-][N+](=O)c1cc(NS(=O)(=O)c2ccccc3cc      |   |   | 0   |
| CC(C)(c1cc(Br)c(O)c(Br)c1)c2cc(Br)c(O)c    |   |   | 0 1 |
| COC(=O)C1=C                                | 1 | 0 |     |
| C[C@@]12CC[C@H](C[C@@H]1O2)C=C             |   |   | 0   |
| CC(CCN=N#N)c1ccccc1                        |   |   | 1   |
| Cc1ccccc1N=Nc2c(O)ccc3ccccc23              |   |   | 1   |
| Cc1cc(ccc1N(=O)=O)C(=O)O                   |   |   | 0   |
| O=N(=O)c1cc(c2c3CCCCc3c4cccc5ccc1c2        |   |   | 1   |
| COC(=O)\C(=C\c1ccccc1Br)\C#N               |   |   | 0   |
| CC(=C)C(=O)OCCCCOC(=O)C(=C)C               |   |   | 0   |
| CCCN1CCC[C@@H]2Cc3n[                       |   | 0 |     |
| C(C1CO1)c2ccc3OCOC3c2                      |   |   | 1   |
| Nc1cccc2c(O)nnc(O)c12                      |   |   | 0 0 |
| OS(=O)(=O)c1ccc2C(=O)c3c(cccc3[N+])(-      |   |   | 1   |
| CNC(=O)ON(C(=O)C)C(=O)NC                   |   |   | 1   |
| Cc1ccccc1N2                                | 0 | 0 |     |
| COS(=O)(=O)OC                              |   |   | 1 0 |
| CC(C)(C)C1=NNC(=S)N(N)C1=O                 |   |   | 0   |
| CN(C(=O)CCl)c1snc2ccccc12                  |   |   | 0   |



|                                             |   |   |   |
|---------------------------------------------|---|---|---|
| CC(CCC(=O)O)C1CCC2C3CCC4CC(O)CCC4           | 0 |   |   |
| CCCCCCCCC]                                  | 1 | 0 |   |
| CC1C(O)CCC2=CC(=O)C3(OC3C12C)C4(C           | 1 |   |   |
| CN(C)CCNC(=O)c1cccc2c(N)c3cccc3nc1          | 1 |   |   |
| COC12C3NC3CN1C4=C(C2COC(=O)N)C(=            | 1 |   |   |
| FC1=CN(C2CCCO2)C(=O)N                       | 0 | 0 | 0 |
| CCC12OC1(C(=O)OC)C(=O)NC2(C)O               | 1 |   |   |
| COC(=O)Cl                                   |   |   | 0 |
| CC1CCN(CCCC(=O)c2ccc(F)                     | 0 |   | 0 |
| Cc1ccc2C(=O)OC(=O)c2c1                      |   |   | 0 |
| COc1ccc(CO)cc1                              | 0 |   | 0 |
| S=C1NC=CC=N1                                |   |   | 0 |
| Cc1c(C)c2c(ccc3ccccc23)c4CCC(=O)c14         | 1 |   |   |
| COc1cc(O)cc                                 | 0 | 0 | 0 |
| [O-][N+](=O)c1cccc(c1)[S+                   | 0 |   |   |
| Cc1ccc(cc1)[S+](=O)([O-])                   | 0 |   |   |
| Clc1ccc([C@H                                | 1 | 0 |   |
| CC(C)C#N                                    |   |   | 0 |
| CC(=CCC=C(C)C=C)C                           |   |   | 0 |
| CC(Cl)CCl                                   | 1 |   | 0 |
| CCCC[C@@H](CC)COC(=O)CCCCCCCCC(=            | 0 |   |   |
| Oc1c(Br)cc(B                                | 0 | 0 | 1 |
| Cc1c(O)cccc1O                               | 0 |   | 0 |
| CCOC(=O)CCC(=O)O[C@H]1[C@H](O[C@@H]2[C@@    | 0 |   | 0 |
| Clc1ccc(cc1Cl)N=N(=O)c2ccc(Cl)c(Cl)c2       | 0 |   |   |
| Oc1c(Cl)cc(Cl                               | 0 | 1 |   |
| CCCC(=O)Nc1                                 | 0 | 0 |   |
| Clc1ccc(CN2C(=O)C(=O)c3                     | 0 |   |   |
| CCC1(CCC(=O)NC1=O)c2cc                      | 0 |   | 0 |
| CC1(C)S[C@@H]2[C@H](NC(=O)COc3ccccc3)C(=O)N | 0 |   | 0 |
| Cc1ccccc1C=O                                | 0 |   | 0 |
| CCCCCCCCC                                   | 0 |   | 0 |
| CC(CCC(=O)O)C1CCC2C3C(O)CC4CC(O)C           | 0 |   |   |
| CCCC[C@H]                                   | 0 | 0 | 0 |
| [O-][n+]1ccc(cc1)N(=O)=O                    |   |   | 0 |
| Cc1ccc(cc1)C(=O)N2N=CC(=C(Cl)C2=O)C         | 0 |   |   |
| Cc1cc(N)c(C)c2c3ccccc3[nH]c12               | 1 |   |   |
| CC(=O)C1(CCNCC1)c2ccccc2                    | 0 |   |   |
| Cn1cc(C(=O)[C@@H]2CCC                       | 0 |   |   |
| CN(CC[C@@H](Oc1ccc(cc                       | 0 |   |   |
| CC(C)C1CCC(                                 | 0 | 0 |   |
| Nc1ccc(cc1)[S+](=O)([O-])                   | 0 |   |   |
| OC(=N)NN=CC(=O)O                            | 0 |   |   |

|                                                  |   |   |
|--------------------------------------------------|---|---|
| O=N(=O)c1ccc2nc3ccc(cc3nc2c1)N(=O):              | 1 |   |
| CN(C)CCC=C1c2ccccc2C=Cc                          | 1 |   |
| CCCCCOC(=O)CC(CC(=O)OCCCCC)(OC(=O)CCC)C(=O)      |   | 0 |
| CCCCCCCCCCCCCCCC                                 |   | 0 |
| CN(C)CC\C=C\1/c2ccccc2C                          | 1 |   |
| CC(=O)CCc1ccc(OC(=O)C)cc1                        |   | 0 |
| Nc1c(N=Nc2ccc(cc2)c3ccc(cc3)N=Nc4cc              | 1 |   |
| CC=CCC=O                                         | 1 |   |
| OC(=O)COCC                                       | 0 | 0 |
| Clc1cc(Cl)c(Cl)c(Cl)c1Cl                         | 0 | 0 |
| CC1(C)S[C@H]                                     | 0 | 0 |
| [O-][N+](=Nc1ccc(Cl)c(Cl)c1)c2ccc(Cl)c(          | 0 |   |
| Clc1cc(cc(Cl)c1Cl)N2C(=O)CCC2=O                  | 0 |   |
| Cc1ccccc1N2C(=Nc3ccc(N)cc3C2=O)CF                |   | 0 |
| Fc1ccc(C(=O)NOCC2CC2)c(Nc3ccc(l)cc3Cl)c1F        |   | 1 |
| OCC(CO)(CBr)CBr                                  | 1 | 0 |
| Nc1ccc2c(ccc3ccccc23)c1                          | 1 |   |
| COc1ccc2C3CCC4(C)C(CCC4(O)C#C)C3CC               | 0 |   |
| c1ccc(cc1)c2nnn[nH]2                             |   | 0 |
| CC(Cl)C(=O)NCc1ccccc1                            | 0 |   |
| C1CC2OC2CCC3OC13                                 | 0 |   |
| CC(=O)OCC1:                                      | 0 | 0 |
| CCC(C)C1SC(C)C(=N1)C                             |   | 0 |
| CC(C)OC(=O)\C=C\c1oc(cc1)[N+](=O)[O              | 1 |   |
| NCC=C                                            | 0 |   |
| O=C([C@H]1O[C@@H]1c2ccccc2)c3ccc                 | 1 |   |
| CC[C@H](C)CCCC(=O)N[C@@H](CCN)C(=O)N[C@@         |   | 0 |
| CCN(CC)CCNc1ccc(C)c2Sc3ccccc3C(=O)c              | 1 |   |
| CC(=CCCC(=C)C=C)C                                | 0 |   |
| COc1ccc(NC(=O)c2csc(c2)[N+](=O)[O-])             | 1 |   |
| [O-]S(=O)(=O)c1cc(ccc1C=Cc2ccc(cc2S(=O)(=O)[O-]) |   | 0 |
| CCCCCCCC(=O)Cl                                   |   | 0 |
| Nc1ccc(cc1O)N(=O)=O                              | 1 | 1 |
| Nc1ccc2ccccc2c1N=Nc3ccccc3                       | 0 |   |
| COc1ccc2[nH]                                     | 0 |   |
| C1CCCNCCC1                                       |   | 0 |
| CCC(=O)C(=O)C                                    | 0 |   |
| NNC(=O)CNC(=O)C=N#N                              | 1 |   |
| CC1(C)C(=O)C(C)(C)C1=O                           |   | 0 |
| C=CCN1C2C1c3ccccc3c4ccccc24                      | 1 |   |
| CC(=O)OC1(CCC2C3CC(=C4CC(=O)CCC4(                | 0 |   |
| CC(C)(Cl)[N+](=O)[O-]                            | 1 |   |
| Nc1ccc2ccc3ccccc3c2c1                            | 1 |   |

|                                                  |   |   |   |
|--------------------------------------------------|---|---|---|
| CC(=CCC[C@](C)(OC(=O)c1ccccc1N)C=C               | 0 |   |   |
| C1CN2C[C@H](N=C2S1)                              | 0 |   |   |
| Nc1ccc(O)cc1                                     | 0 |   | 1 |
| Cc1nc2c(ccc3ccc4ccc(O)cc4c23)n1C                 | 1 |   |   |
| CCCCC1=CC=CC(=O)O1                               |   |   | 0 |
| CCCC[C@H]                                        | 0 | 0 |   |
| [O-][N+](=O)c1ccc2c(cc3ccccc3c12)[N-             | 1 |   |   |
| CCOC(=O)c1c                                      | 0 | 0 | 0 |
| OCc1ccnc2ccccc12                                 | 0 |   |   |
| CCN(CC)CCO[C@H]1CC[C@                            | 1 |   |   |
| COc1ccc2c(c1)C(=O)c3nccc4cc(OC)c(OC              | 1 |   |   |
| Nc1cc(cc2cc(cc(O)c12)S(=O)(=O)O)S(=O)(=O)[O-]    |   |   | 0 |
| Cc1c(cc(cc1[N+](=O)[O-])[N+](=O)[O-])            | 1 |   |   |
| NC(Cc1ccc(O)c(c1)N(=O)=O)C(=O)O                  | 0 |   |   |
| CC(=O)c1ccc(                                     | 0 | 0 | 0 |
| CN(C)c1ccc(cc1)N=Nc2ccccc2                       | 1 |   |   |
| CS(=O)(=O)Nc1ccc(Nc2c3ccccc3nc4cc(c              | 1 |   |   |
| CN(C\C=C/c1                                      | 1 | 0 |   |
| Cc1ccc(cc1)S(=O)(=O)N2C3C2c4ccccc4c              | 1 |   |   |
| Cc1ccc2ccc3c4ccccc4ccc3c2c1                      | 1 |   |   |
| OC[C@@H](O)[C@@H](O)[C@H](O)[C@H](O)CO[CC        |   |   | 0 |
| COc1cc2OCC3=C(C(=O)c4c                           | 0 |   |   |
| CC1(C)CON(Cc2ccccc2Cl)C1=O                       |   |   | 0 |
| [O-][N+](=O)C([N+](=O)[O-])([N+](=O)[O-])N(=O)=O |   |   | 0 |
| C[C@]12CCC:                                      | 1 | 1 |   |
| CN1CCN=N1                                        |   |   | 1 |
| CCCCc1ccc2cccc(c2c1)S(=O)(=O)[O-]                |   |   | 0 |
| Cc1ccccc1C(=O)O                                  |   | 0 | 0 |
| ClCC1CO1                                         | 0 | 0 | 1 |
| CC(C)N(CC[C                                      | 1 | 0 |   |
| CN(C)C(=O)C(c1ccccc1)c2ccccc2                    |   |   | 0 |
| Cc1ccc(N)c(N)c1                                  |   |   | 1 |
| CC(C)C(O)(C(C)O)C(=O)OCC1=CCN2CCC(               |   | 0 |   |
| CC1(C)C[C@@H]2[C@@H]                             |   | 0 |   |
| C[C@@H](CSC(=O)c1ccccc1)C(=O)N2C[C@H](C[C@H      |   |   | 0 |
| CC(=CCC\C(=                                      | 0 | 0 | 0 |
| C[C@H]1C[C@H]2[C@@H]3CC[C@](O)(C(=O)COC(=C       |   |   | 0 |
| OC(CNCCNC(                                       | 0 | 0 | 0 |
| NC(=O)c1cc(                                      | 0 |   |   |
| CC(C)CCC[C@                                      | 0 | 0 | 0 |
| N[C@@H](C                                        | 0 | 0 |   |
| O=C1N(N=Cc2ccc(cc2)N(=O)=O)N=Nc3c                |   | 1 |   |
| CCS(=O)(=O)CCn1c(C)ncc1N(=O)=O                   |   | 1 | 0 |

|                                             |   |   |   |
|---------------------------------------------|---|---|---|
| CCS(=O)(=O)                                 | 0 | 0 | 0 |
| CC(Br)(CBr)COP(=O)(OCC(C)(Br)CBr)OC(        | 0 |   |   |
| CS(=O)CCC(N)C(=O)O                          | 0 |   |   |
| CCC(=O)OCC(=O)[C@@]1(OC(=O)CC)[C@@H](C)C[C@ |   |   | 1 |
| CC(=O)c1c(cc(N(=O)=O)n1N(=O)=O)N(=          | 1 |   |   |
| N[C@@H]1CC[C@@H](C[C@@H]2CC[C               | 0 |   |   |
| [O-][N+](=O)                                | 0 | 0 |   |
| CC(C)(C)C1=CC(=O)C=C(C1=O)C(C)(C)C          |   |   | 1 |
| CC(=O)Nc1ccc2c(Cc3ccccc23)c1O               | 0 |   |   |
| COCC(=O)Nc                                  | 0 | 0 |   |
| CC(C)(Cc1c[nH]c2ccc(Cl)cc                   | 0 |   |   |
| CC1(C)Cc2cccc(O)c2O1                        |   |   | 0 |
| CN(CCO)CCO                                  | 0 |   |   |
| O=S1(=O)CCCCO1                              | 1 |   |   |
| CC(Oc1ccc(Cl)cc1Cl)C(=O)O                   | 0 |   | 0 |
| NC(=N)c1ccc                                 | 0 | 0 | 0 |
| COc1ccc(cc1)N=N(=O)c2ccc(OC)cc2             | 1 |   |   |
| CSc1cc2CCN(C(=O)Nc3ccci                     | 0 |   |   |
| CBr                                         |   |   | 1 |
| NS(=O)Oc1c                                  | 0 |   |   |
| COP(=O)(OC)Oc1ccc(c(C)c1)[N+](=O)[O         | 1 |   |   |
| Oc1ccc2cc3c4ccccc4c5ccccc5c3cc2c1           | 1 |   |   |
| CC(=N)NCCC                                  | 0 | 0 |   |
| O=C(C1CCC1)c2ccccc2                         |   |   | 0 |
| CC(CCC(=O)O)C1CCC2C3CCc4cc(O)ccc4C          | 0 |   |   |
| CCO[P@](=O)(NC(C)C)Oc1ccc(SC)c(C)c1         | 0 |   |   |
| O=N(=O)c1ccc2c(ccc3ccc(cc23)N(=O)=C         | 1 |   |   |
| N[C@@H](C[S+](O)[O-])C                      | 0 |   |   |
| COc1cccc(C=O)c1O                            | 0 |   |   |
| CN1C[C@@H](C=C2[C@H]                        | 0 |   | 1 |
| COc1ccc(C)cc1N                              | 1 |   | 0 |
| CC1OC(CC(O)C1O)OC2C(O                       | 1 |   |   |
| Cc1ccc2c(C)c3C(O)C(O)c4ccccc4c3nc2c1        | 0 |   |   |
| COc1ccc2CC3                                 | 0 | 0 |   |
| O=C(OCCCCOC(=O)c1ccccc1)c2ccccc2            |   |   | 0 |
| OCN1C(O)C(O)N(CO)C1=O                       | 1 |   |   |
| OC(=O)c1cc(                                 | 0 | 0 | 0 |
| CN1[C@@H]2C[C@@H](C[C@H]1[C@H               | 0 |   |   |
| CC(NCCC(c1c                                 | 1 | 1 | 1 |
| BrCc1c2ccccc2cc3ccccc13                     | 1 |   |   |
| OC(c1ccc(Cl)cc1)(c2cncnc2)c3ccccc3Cl        |   |   | 1 |
| CC(C)OC(=O)CC(=O)OC(C)C                     | 0 |   |   |
| O[C@@H]1N=C(c2ccccc2)c3cc(Cl)ccc3NC1        | 0 |   |   |

|                                                   |   |   |   |   |
|---------------------------------------------------|---|---|---|---|
| Cc1ccc2nsc(NC(=O)C(Cl)Cl)c2c1                     |   |   | 1 |   |
| CC(c1cnc[nH]                                      | 0 | 0 |   |   |
| C(=Cc1ccncc1)c2ccccc2                             |   |   |   | 1 |
| BrCC#C                                            |   |   | 1 |   |
| CCC(=O)NC1CCc2cccc(OC)c1                          |   | 0 |   |   |
| COc1cc2C=C(Oc3ccc4C=CC                            |   | 0 |   |   |
| CCCCCCCCC(=O)OCC                                  |   |   |   | 0 |
| OCC(CBr)(CBr)CBr                                  |   |   | 1 | 0 |
| CC(=O)c1ccccc1N(=O)=O                             |   |   | 0 | 0 |
| CN1CCCN=C1\C=C\c2cccs2                            |   |   |   | 0 |
| COc1ccc(\C=C\c2ccc(cc2)[N+](=O)[O-])c1            |   |   | 1 |   |
| COc1ccc(OC)c2C(=S)c3ccc(O                         |   | 0 |   |   |
| CC1(C)O[C@@H]2C[C@H]3[C@@H]4CCCC5=CC(=O)C=        |   |   |   | 0 |
| OC(=O)c1ccc                                       | 1 | 0 |   |   |
| OC[C@@H]1                                         | 0 | 0 |   |   |
| CCC(=O)OC                                         |   |   |   | 0 |
| Cc1ccc(OC(=O)c2ccccc2O)cc1                        |   |   |   | 0 |
| COc1cc2CC3N(C)CCc4c(CO                            |   | 0 |   |   |
| Cc1cc2nc3c(ccc4ccccc34)c(C)c2cc1C                 |   |   | 1 |   |
| CCOc1ccc(NC(=O)CC(=O)C)cc1                        |   |   |   | 0 |
| NCCCC(NC(Cc1ccccc1)C(=O)O)C(=O)N                  |   |   | 0 |   |
| OC(=O)CC(C(C(=O)O)C(=O)O)C(=O)O                   |   |   | 1 | 0 |
| OC(=O)c1c(I)cc(I)c(NC(=O)CCCC(=O)Nc2c(I)cc(I)c(C( |   |   |   | 0 |
| O[C@H]1C=C2c3cc4ccccc4cc3c5cccc([C@               |   |   | 1 |   |
| CCOC(=O)C(C#N)c1snc2ccc(cc12)[N+](=               |   |   | 1 |   |
| Nc1cc(Cl)c(cc1Cl)c2cc(Cl)c(N)cc2Cl                |   |   | 1 | 1 |
| O=C1OC(=O)C2CCCCC12                               |   |   |   | 0 |
| N[C@@H](CCCNC(=O)N)C                              |   | 0 |   |   |
| CC(=C(CCO)SSC(=C(C)N(Cc1cnc(C)nc1N)C=O)CCO)N(C    |   |   |   | 0 |
| Cc1ccc(cc1NO)[N+](=O)[O-]                         |   |   | 0 |   |
| COc1cc2N3[C@H]4[C@@H]5[C@H](CC3=O)OCC=C6C         |   |   |   | 0 |
| NC(=N)c1cc2ccc(Br)cc2[nH]1                        |   |   | 0 |   |
| NC1=NC(CS1)C(=O)O                                 |   |   | 0 |   |
| BrC1CCCC(c1)N(=O)=O                               |   |   | 1 |   |
| [O-][S+]1(=O)N(CCCN2CCF                           |   | 0 |   |   |
| CCCCC(=O)OCC                                      |   |   | 0 | 0 |
| C[S+](CC[C@                                       | 0 | 0 |   | 0 |
| C[C@]12CC=                                        | 0 |   |   |   |
| OC1C2OC2c3ccc4ncccc4c3C1O                         |   |   | 0 |   |
| CCC[C@@H]1C[C@H](N(C)C1)C(=O)N[C@H]([C@H](C       |   |   |   | 0 |
| Cc1ccc2nsc(N)c2c1                                 |   |   | 1 |   |
| COc1ccccc1N                                       | 0 | 0 |   | 0 |
| CC(=O)c1ccc2[nH]c3c(C)cc(c(C)c3c2c1)[             |   |   | 1 |   |



|                                              |   |   |   |   |
|----------------------------------------------|---|---|---|---|
| O=C1C[C@@H]2OCC=C3CN4CC[C@@]56[C@@H]4C[      |   |   |   | 0 |
| CN(C)N=Nc1ccc(cc1)N(=O)=O                    |   |   | 1 |   |
| COc1cc(CC=C)cc(C(=O)NCC                      | 0 |   |   | 0 |
| CCS(=O)CCSP(=O)(OC)OC                        |   |   | 1 |   |
| NCCCI                                        |   |   | 1 |   |
| OC1=CC2=C3c4ccc(O)c(O)c                      | 0 |   |   |   |
| [O-]c1ccccc1N(=O)=O                          |   |   |   | 0 |
| COc1ccc(cc1)C2=COc3cc(C                      | 0 |   | 0 |   |
| CCCCCCCCC                                    | 0 | 0 | 0 | 0 |
| Cc1ccc2nc3c4C=CC(O)C(O)c4ccc3c(C)c2          |   |   | 1 |   |
| Cc1ccccc1N=Nc2ccc(N)c(C)c2                   |   |   | 1 |   |
| CC(C)Oc1ccccc1OC(=O)N(C)N=O                  |   |   | 1 |   |
| CC1=C(CCN2CCC(CC2)c3no                       | 0 |   |   |   |
| CCOP(=O)(CC)Oc1ccc(cc1)N(=O)=O               |   |   |   | 0 |
| CC(C\N=C\c1ccccc1O)\N=C\c2ccccc2O            |   |   |   | 0 |
| COc1cc(ccc1N)N=Nc2ccccc2                     |   |   | 1 |   |
| Nc1ccc(N=Nc                                  | 0 | 0 |   | 1 |
| CCN(CCO)CC                                   | 0 | 0 |   | 0 |
| CNC(=O)N(c1ccccc1)c2ccccc2                   |   |   | 0 | 0 |
| O=C(OCc1ccccc1)\C=C\c2c                      | 0 |   |   |   |
| OC1CCCCC1                                    |   |   | 0 | 0 |
| CN1C(=O)N(                                   | 0 | 0 |   | 0 |
| CCC[C@@H](O)[C@@H](CC)CO                     |   |   | 0 |   |
| CCCCNC(=O)I                                  | 0 |   | 0 | 0 |
| CC(C)C(=O)c1                                 | 0 | 0 |   | 0 |
| ONc1ccn(=O)c2ccccc12                         |   |   | 1 |   |
| C(C1=NCCN1                                   | 0 | 0 |   | 0 |
| CCN(CC)C(=S)SSC(=S)N(CC)CC                   |   |   | 0 | 1 |
| CCCC[N+](C)(CCCC)CCCC                        |   |   |   | 0 |
| OC1ccnc(O)n                                  | 0 | 0 | 0 |   |
| CC(C)[C@@H                                   | 0 | 0 |   |   |
| OC1cc2ccc(cc2cc1S(=O)(=O)O)S(=O)(=C          | 0 |   |   |   |
| OC(=O)\C=C\c1oc(cc1)[N+](=O)[O-]             |   |   | 1 |   |
| Nc1c2CCCc2r                                  | 0 | 0 |   | 0 |
| CCN(CCCI)c1ccc(OCCCCCNc2c3ccccc3nc           |   |   | 1 |   |
| CNNC                                         |   |   |   | 0 |
| CN1CCN(CC1)c2ccc3[nH]c(Cc4ccc5[nH]c          |   |   | 0 |   |
| CC(C)Nc1nc(Cl)nc(NC(C)C)n1                   |   |   | 0 | 0 |
| OC(=O)c1cc2OCOC2c3c4ccccc4cc(c13)N           |   |   | 1 |   |
| COc1ccccc1N                                  | 1 | 0 |   |   |
| CN(C)CC[C@                                   | 1 | 0 |   |   |
| c1ccc2c(c1)ccc3ccccc23                       |   |   |   | 0 |
| O[C@@H]1[C@@H](Cc2ccc(cc2)c3ccccc3)COc4cc(cc |   |   |   | 0 |

|                                                |   |   |
|------------------------------------------------|---|---|
| CCCCCCCCC                                      | 0 | 0 |
| BrC1ccc(cc1)C(=O)C2OC2c3cccc3                  | 0 |   |
| CC1(C)[C@H]2CC[C@H](C2)C1=C                    |   | 0 |
| C[C@H](OCCC(C)(C)O)[C@H]1CC[C@H]2\C(=C\C=C/C/3 |   | 0 |
| CC(=O)Nc1cc(O)c2ccc3cccc4ccc1c2c34             | 1 |   |
| Nc1nnc(S)s1                                    | 0 |   |
| O=C1C(=O)c2ccc(c3ccc4cccc1c4c23)N(=            | 1 |   |
| NC(=N)NC(=I                                    | 0 | 0 |
| CC1N(C)C=CC                                    | 0 | 0 |
| COc1ccc2cccc3C(=O)N(C)C(=O)c1c23               | 0 |   |
| Oc1ccc(cc1)C(=O)N\N=C\c2oc(cc2)[N+]            | 1 |   |
| CC(C)(C)NCC(                                   | 0 | 0 |
| CC(=O)Nc1ccc(cc1)C(=O)C2OC2c3cccc3             | 1 |   |
| COc1cccc1NC(=O)CC(=O)C                         |   | 0 |
| C(Oc1cccc2cccc12)C3CO3                         | 1 |   |
| Cc1cc(ccc1[C@H](N)C(=O)                        | 0 |   |
| OS(=O)(=O)ONNCCc1cccc1                         | 1 |   |
| COc1cc(OC)nc(Sc2cccc(Cl)c2C(=O)[O-])n1         |   | 0 |
| C1CN(CCO1)SSN2CCOCC2                           | 0 |   |
| CS(=O)(=O)C                                    | 0 |   |
| OC1=C(Oc2cccc2C1=O)c3                          | 0 |   |
| NC(=S)c1c(Cl)cccc1Cl                           | 1 | 0 |
| OC(=O)C1CSCN1                                  | 0 |   |
| CCC(C)(C)c1c                                   | 1 | 0 |
| COC(=O)Nc1nc2ccc(cc2[nH]1)C(=O)c3cccs3         |   | 1 |
| CCCC(CC)COP(=O)(Oc1cccc1)Oc2cccc               | 0 |   |
| CC(C)(C)C(=O)CC(=O)C(C)(C)C                    |   | 0 |
| CCc1ccc2C(=O)c3cccc3C(=O)c2c1[N+](:            | 1 |   |
| N[C@H](COF                                     | 0 | 0 |
| C1CCC2=C(C1)c3cc4cccc4c5cc6cccc6c2             | 1 |   |
| COc1ccc(C)cc1N(=O)=O                           |   | 0 |
| C[C@H]1C[C(                                    | 1 |   |
| [O-][N+](=O)c1ccc(cc1)c2ccc(cc2)[N+](:         | 1 |   |
| CC12CC(O)C3                                    | 0 | 0 |
| COCc1nc(C2=NC(C)(C(C)C)C(=O)N2)c(c1)C(=O)O     |   | 0 |
| Br\C=C\Br                                      | 1 |   |
| O=N(=O)c1ccc2ccc3nc4cccc4c5ccc1c2c             | 1 |   |
| CC(=O)Oc1ccc2c(OC3(C)OOC23C)c1                 | 1 |   |
| CC(C)(O)C#CC(C)(C)O                            |   | 0 |
| CC(=O)\C(=N/O)\C                               | 0 |   |
| Nc1nc2cccc2s1                                  | 0 | 0 |
| N[C@]1(CC(C                                    | 0 | 0 |
| CC(C)OC(=O)COc1ccc(Cl)cc1Cl                    | 0 | 0 |



|                                               |   |   |
|-----------------------------------------------|---|---|
| CC1(C)S[C@H]2[C@H](NC                         | 0 |   |
| CCN(=O)(CC)CCn1nc2c3ccc(Cl)cc3Sc4c(C          | 1 |   |
| Nc1ccc(Cc2ccc(NO)c(Cl)c2)cc1Cl                | 1 |   |
| Cc1c(cccc1[N+](=O)[O-])N=O                    | 0 |   |
| CCC(C)(S(=O)                                  | 0 | 0 |
| NC1=NC(S)C;                                   | 0 | 1 |
| CCOC(OCC)P(=O)(O)CCCN(                        | 0 |   |
| CC(=O)Oc1cc                                   | 0 | 0 |
| CC1(C)CC(C(=O)NCCCCCCCCCCC(=O)O)(             | 0 |   |
| CN[S+](=O)([O-])Cc1ccc2[                      | 0 |   |
| CCCCCCCCCCCCCCCC[N+](C)(C)Cc1ccc              | 0 | 1 |
| COc1cc2c3CCC(=O)c3cc(C)c2c4cccc14             | 1 |   |
| OCCN(CCO)c1nc(nc2cccc12)c3ccc(s3)N            | 1 |   |
| CC(C)C(=O)Nc1cccc1                            | 0 |   |
| CCC(C)Br                                      |   | 0 |
| CC(C)(O)[C@                                   | 0 | 0 |
| CC(C)C1[C@H]2[C@@H](C                         | 0 |   |
| Cc1ccc(cc1)c2oc3cccc3n2                       | 0 |   |
| CCCCc1cc2C(=O)C(=CNc2cc1OCc3cccc3)C(=O)OC     |   | 0 |
| NC(=N)NC[C]                                   | 0 | 0 |
| N#CCCCC#N                                     | 0 | 0 |
| CC(=O)OC1CCCC1C(C)(C)C                        |   | 0 |
| FC(F)(F)c1cccc(CC#N)c1                        |   | 0 |
| OC(=O)C=Cc1ccc(cc1)N(=O)=O                    | 1 |   |
| C\C=C/C=C                                     | 0 |   |
| NC(CSC(F)(F)C(Br)Br)C(=O)O                    | 1 |   |
| Nc1cc(ccc1S(=O)(=O)O)S(=O)(=O)O               |   | 0 |
| Cc1cc(N)cc(N)c1                               | 0 |   |
| CC(NN)c1cccc1                                 |   | 0 |
| Clc1cc(Cl)c(Cl)c(Cl)c1                        | 0 | 0 |
| OC1C=Cc2c(ccc3c4cccc4c(cc23)[N+](=C           | 1 |   |
| Nc1ccc(Nc2ccc(cc2)N(=O)=O)cc1                 | 1 |   |
| Fc1cnc2c(ccc3ncc(F)cc23)c1                    | 0 |   |
| CC(C)(C)C(=O)Cl                               |   | 0 |
| CC(=O)OCC(=O)Nc1cc(cc(NC(=O)COC(=O)C)c1Cl)C#N |   | 0 |
| C1CCC(CC1)N(Sc2nc3cccc3s2)C4CCCC4             |   | 0 |
| CCCCCCCC[N+](C)(C)CCCCCCC                     |   | 1 |
| COc1cc(cc(OC)c1OC)C(=O)OC(COCCC(C)C)CN2CCOCC2 |   | 0 |
| CC(N)C(=O)Nc1c(C)cccc1C                       | 0 | 0 |
| Cc1ccc2cccnc2c1                               | 1 | 0 |
| CC[C@H]1CC[C@H](NCc2cc3N(C)C(=O)[C@@H]4C[C@   |   | 0 |
| NC(CCC(=O)NC(CSCC)C(=O)NCC(=O)O               | 1 |   |
| C[C@H]1C2C                                    | 0 | 0 |

|                                                |   |   |   |   |
|------------------------------------------------|---|---|---|---|
| CC(C)NCC(O)                                    | 0 | 0 | 0 | 0 |
| Clc1ccc(CN2CCN/C/2=N\N(=O)=O)cn1               |   |   |   | 0 |
| Nc1cc(cc(c1O)[N+](=O)[O-])[N+](=O)[C           |   |   | 1 |   |
| COC(=O)\C=C/C(=O)OC                            |   |   |   | 0 |
| CCNc1nc(NC(C)C(C)C)nc(SC)n1                    |   |   |   | 1 |
| NC(=O)C(=O)                                    | 0 | 0 |   |   |
| Fc1cnc2c(c1)cc(F)c3ccccc23                     |   |   | 0 |   |
| [O-][N+](=O)c1ccccc1Br                         |   |   | 1 |   |
| CCCCCCCC\C=C\C[C@H]1CC(=O)OC1=C                |   |   | 0 |   |
| CCOC(=O)[C@@H]1O[C@H]1c2ccccc2                 |   |   | 0 |   |
| Nc1ncnc2c1r                                    | 0 | 0 |   | 0 |
| NNCCO                                          |   |   | 1 | 0 |
| C[C@]12CC[C@H]3[C@@H](CCC4=CC(=O)C=C[C@]34     |   |   |   | 0 |
| CC[N+](=C1C=CC2=Nc3c(OC2=C1)cc(N)c             |   |   | 1 |   |
| Cc1ccc(cc1)S(=O)(=O)NC(=O)Nc2ncc(s2            |   |   | 0 |   |
| Cc1ccc(c2ccccc12)N(=O)=O                       |   |   | 1 |   |
| CCOC(=O)C(C)Oc1ccc(Oc2oc3cc(Cl)ccc3n2)cc1      |   |   |   | 0 |
| CN[C@@H](C)[C@H]1CC(                           | 0 |   |   |   |
| c1ccc2c(c1)c3ccc4ccc5ccccc6cc2c3c4c56          |   |   | 1 |   |
| CCCCC(=O)O                                     |   |   | 0 | 0 |
| NC(CSC\C=C\Cl)C(=O)O                           |   |   | 0 |   |
| COC(=O)C1=C(C)NC(=C(C1c2ccccc2))[N+            |   |   | 0 |   |
| CCCN                                           |   |   |   | 0 |
| CCNCC(=C)C                                     |   |   |   | 0 |
| CCOC(=O)c1cn2nc(OP(=S)(OCC)OCC)cc2nc1C         |   |   |   | 0 |
| CC(C)(C)c1ccccc1O                              |   |   |   | 1 |
| CC(C)OC(=O)C(O)(c1ccc(Cl)cc1)c2ccc(Cl)cc2      |   |   |   | 1 |
| O=NN1CCCCC1                                    |   |   | 1 | 0 |
| CC1(C)CC(O)CC(C)(C)N1O                         |   |   | 1 |   |
| CC(=O)Nc1ccc(\C=C\C(=O)c2ccccc2)cc1            |   |   | 1 |   |
| Cc1cn2c(N=O)c(nc2s1)c3ccc(cc3)[N+](=           |   |   | 1 |   |
| CCC(C)OC(=O)C=Cc1oc(cc1)N(=O)=O                |   |   | 1 |   |
| CCOC(=O)CCCCCCC\C=C\C\C=C\C\C=C\C\CC           |   |   |   | 1 |
| CC[C@@H](C)N                                   |   |   | 0 |   |
| Cc1ccc(cc1)n2nc(cc2NC(=O)Nc3ccc(OCCN4CCOCC4)c5 |   |   |   | 1 |
| CC(N)(Cc1ccc                                   | 0 | 0 |   |   |
| CN(C(=O)C(Cl)Cl)c1ccc(OC(=O)c2occc2)cc1        |   |   |   | 0 |
| Oc1ccc(Cl)cc1Cl                                |   |   | 0 | 1 |
| [O-][N+](=O)c1ccccc1[N+](=O)[O-]               |   |   | 1 |   |
| COC(=O)CC(=O)C                                 |   |   | 0 | 0 |
| CC(C)(OO)c1ccccc1                              |   |   | 1 | 0 |
| Nc1cccc2cccc(N)c12                             |   |   | 1 |   |
| CNC1C(O)C(C                                    | 0 | 0 |   |   |



|                                                             |   |   |   |
|-------------------------------------------------------------|---|---|---|
| CCCCC(O)(Cn1cncn1)c2ccc(Cl)cc2Cl                            |   |   | 1 |
| O=C(CS(=O)C                                                 | 0 | 0 |   |
| CN(C)[C@@H]1[C@@H]2C[C@@H]3Cc4c(cc(NC(=O)CN                 |   |   | 0 |
| NC1=NCC2N:                                                  | 1 | 0 | 0 |
| CC(C)CCCCCOP(=O)(Oc1cccc1)Oc2cc                             |   | 0 |   |
| ClCCCl                                                      |   | 1 | 0 |
| CN1CCC[C@                                                   | 1 |   | 0 |
| C1CC[C@@H](NC1)c2cccn                                       |   | 0 |   |
| Oc1ccc(O)c(O)c1                                             |   | 1 |   |
| OC(=O)CCC(=                                                 | 0 | 0 |   |
| Cc1ccc(C)c(O)c1                                             |   | 0 | 0 |
| Cc1nnc2cc(cr                                                | 0 |   |   |
| CC(C)NC[C@                                                  | 0 | 0 |   |
| Nc1c2ncn(c2nc[n+] <sup>1</sup> [O-])C(c3cccc3)(c4           |   | 1 |   |
| Cc1ccc(C)c(c1)[N+](=O)[O-]                                  |   | 1 |   |
| CCN(CC)c1ccc(C(=O)c2cccc2C(=O)O)c(O)c1                      |   |   | 0 |
| c1ccncc1                                                    |   | 0 | 0 |
| OC[C@@H](O)[C@@H](O                                         |   | 0 |   |
| OC(=O)c1ccc(O)cc1O                                          |   | 0 | 0 |
| C[N+] <sup>1</sup> 2CCC(CC1)C(C2)OC(=O)C(O)(c3cccc3)c4cccc4 |   |   | 0 |
| [O-][N+] <sup>1</sup> =C2C=CC(=O)C=C2\C(=N/c3cc             |   | 0 |   |
| OC(=O)C(Cl)(                                                | 0 | 0 | 0 |
| Nc1nc(F)nc2                                                 | 0 | 0 |   |
| CCc1c2cccc2cc3c4C5OC5C(O)C(O)c4ccc                          |   | 1 |   |
| CCCCN1CC(O                                                  | 0 | 0 |   |
| CCCC\C=C\C=C\C=O                                            |   |   | 1 |
| CCN[C@] <sup>1</sup> (C                                     | 0 | 0 |   |
| CS(=O)(=O)OC1CN(C1)C(c2cccc2)c3ccc                          |   | 1 |   |
| COc1nccc(n1)c2c(ncn2C3C                                     |   | 0 |   |
| NC(=N)Nc1c                                                  | 0 | 0 |   |
| Nc1ccc(cc1)[S+](=O)(N)[O                                    |   | 0 |   |
| Cc1cccc(C)c1C                                               |   | 1 |   |
| C1CC=C2C(C1)CCc3cccc23                                      |   | 1 |   |
| CC1(C)CCC2=C(O1)c3cccc:                                     |   | 0 |   |
| CC(C)C(=O)Nc1snc2cc(Cl)ccc12                                |   | 0 |   |
| Cn1cnc(c1Sc2[nH]cnc3ncnc23)[N+](=O)                         |   | 1 |   |
| COc1cc2CCN                                                  | 0 | 0 |   |
| CC(C)(COC(=O)c1cccc1)COC(=O)c2cccc2                         |   |   | 0 |
| Nc1ccc(Cc2ccc(N)cc2[N+](=O)[O-])c(c1)                       |   | 1 |   |
| CN([C@@H]:                                                  | 1 | 1 |   |
| C[C@] <sup>1</sup> 2CC[C                                    | 0 | 0 | 0 |
| CC12CCCC(C)(C1CCC34CC(O)(CCC23)C(=                          |   | 0 |   |
| CCCCCCCCC                                                   | 0 | 0 |   |

|                                             |   |   |   |
|---------------------------------------------|---|---|---|
| OC1(O)C(=O)NC(=O)NC1=O                      | 0 |   |   |
| CCN(CC)CCC(                                 | 1 |   |   |
| Oc1cc(ccc1[N+](=O)[O-])[N+](=O)[O-]         | 1 |   |   |
| COCCOCCOCCOCCOC                             |   |   | 0 |
| COc1cc(ccc1O)C(=O)C                         | 0 |   |   |
| CC(=O)OCC(=                                 | 0 | 0 |   |
| Clc1ccc(CC2CO2)cc1                          | 1 |   |   |
| OC1OC(=O)C(=C1C(Cl)Br)Cl                    | 1 |   |   |
| C[C@@H]1O                                   | 0 |   | 1 |
| OC(=O)\C=C\c1ccc(\C=C\C(=O)O)cc1            | 0 |   |   |
| Cn1c2ccccc2c3ccc(cc13)[N+](=O)[O-]          | 1 |   |   |
| CC(=C)C1CC=C(C)C(O)C1                       | 0 |   | 0 |
| O[C@@H]([C@@H](COC(=O)CCC(=O)[O-])NC(=O)C(C |   |   | 0 |
| Clc1ccc(cc1)c2oc3ccccc3n2                   | 0 |   |   |
| CCNc1nc(O)nc(NC(C)C)n1                      | 0 |   |   |
| Nc1ccc(\C=C\c2ccccc2)cc1                    | 1 |   |   |
| CN(CCC1ccc(Cl)c(Cl)c1)[C@                   | 1 |   |   |
| CCCCCCC(=C                                  | 0 | 0 |   |
| O=N(=O)c1cc(c2c(cc(cc2c1)N(=O)=O)N(         | 1 |   |   |
| C\C=C\C1OC(=O)C=CC1O                        | 0 |   |   |
| OC(C1CN2CC                                  | 1 | 0 |   |
| COc1ccc2c(c1)[nH]c3c(C)n                    | 1 | 1 |   |
| ClCC=CCCl                                   |   |   | 0 |
| CCCCCC(O)CC                                 | 0 | 0 |   |
| CN1C(CCl)Nc                                 | 0 |   |   |
| O=C(Cc1ccccc1)c2ccccc2                      |   |   | 0 |
| OC[C@H]1O                                   | 0 |   |   |
| [O-][N+](=O)c1ccc2ccc3ccc(N=O)c4ccc1        | 1 |   |   |
| C[C@H]1C[C@H]2OC(=O)[C@H](C)[C@             | 1 |   |   |
| Oc1ccc2ccccc2c1N=Nc3ccc4ccccc4c3S(=         | 0 |   |   |
| CCCCCCCCCCCCCCCCOCCO                        |   |   | 0 |
| CCN(CC)c1ccc(cc1)C(=C2C=CC(=[N+](CC)        | 1 |   | 1 |
| CNC(=O)[C@@H](C)SCCSP(=O)(OC)OC             | 1 |   |   |
| CCCCOC(=O)CO                                |   |   | 0 |
| NCCCC[C@H](NC(=O)[C@@H]1CCCN1C(=O)[C@@H];   |   |   | 0 |
| CCN(Cc1cccc(c1)S(=O)(=O)O)c2ccc(cc2)        | 1 |   |   |
| NCCCC[C@H](NC(=O)[C@@H]1CCCN1C(=O)[C@@H];   |   |   | 0 |
| [O-][N+](=O)                                | 0 | 0 | 0 |
| Nc1ccc(cc1)S                                | 0 |   | 0 |
| Cc1cc2ccccc2cc1[N+](=O)[O-]                 | 0 |   |   |
| CC[C@@]1(C                                  | 0 | 0 |   |
| CC1CCCC(=O)CCCCCc2cc(O)cc(O)c2C(=O          | 0 |   |   |
| Nc1ccc(CCC2ccc(N)cc2)cc1                    | 1 |   |   |

|                                                   |   |   |   |   |
|---------------------------------------------------|---|---|---|---|
| Nc1nc(cs1)\(                                      | 0 | 0 |   |   |
| CCCC(CCC)C(-                                      | 0 | 0 |   |   |
| CC[n+] <sub>1</sub> c(c2c                         | 0 |   | 1 | 1 |
| CCNc1nc(N)nc(Cl)n1                                |   |   | 0 | 0 |
| c1ccc(cc1)n2                                      | 0 | 0 |   | 0 |
| Cc1cnc2ccc3c(nc(NC4OC(C(O)C(O)C4O)(               | 0 |   |   |   |
| CC(C)(C)c1cc(ccc1[N+](=O)[O-])c2ccccc:            | 0 |   |   |   |
| OCc1ccc2c3cccc4cccc(c2c1)c34                      |   |   | 1 |   |
| CCC(=O)N(C1CCN(Cc2cccs2)CC1)c3ccccc3              |   |   |   | 0 |
| CCCCCCCCCCCCN(C)N=O                               |   |   | 1 |   |
| C[C@@H](Oc1ccc(Cl)cc1C)C(=O)O                     |   |   | 0 |   |
| C[C@@H](O)C[N+](C)(C)NC(=O)C(=C)C                 |   |   | 0 |   |
| COc1ccc2c(c1)c3cc(OC)ccc3c4c5ccc(OC)              |   |   | 1 |   |
| CN(C)[N+](=O)[O-]                                 |   |   | 1 |   |
| [O-][N+](=O)c1cc(cs1)C(=O)Nc2cccc(Br              |   |   | 1 |   |
| [O-][S+](=O)(NCCCCCc1c                            |   | 0 |   |   |
| CCOS(=O)(=O)c1ccccc1                              |   |   | 1 |   |
| CN[C@H]1[C                                        | 0 | 0 |   |   |
| COC(=O)[C@@H](N)CCCN\C(=N\N(=O)=O)\N              |   |   |   | 0 |
| Cc1cccc(C(=O)O)c1N(=O)=O                          |   |   |   | 0 |
| Cc1c(c(C)c(c(c1N(=O)=O)C(C)(C)C)N(=O              | 0 |   |   | 1 |
| [O-]S(=O)(=O)C(CC(=O)OC1CCCCC1)C(=O)OC2CCCCC2     |   |   |   | 0 |
| Nc1ccc2cc3c                                       | 1 | 0 | 1 | 1 |
| CN(C)c1ccc(\C=C\c2ccc(cc2)[N+](=O)[O              |   |   | 1 |   |
| C\C(=C)\CCO                                       | 0 | 0 |   |   |
| COc1cc2c(CC                                       | 0 | 0 |   |   |
| FC(=C(Cl)Cl)SSc1ccccc1N(=O)=O                     |   |   | 1 |   |
| C1COCCOCCOCCOCCOCCOCCO1                           |   |   | 0 |   |
| Cc1cc(OCCOCC[N+](C)(C)Cc2ccccc2)ccc1C(C)(C)CC(C)( |   |   |   | 1 |
| COC1=CC(=O)c2c(nc(C)c3c4CCCCc4[nH]c               |   |   | 1 |   |
| Nc1ccc(cc1Cl)c2cc(Cl)c(N)c(Cl)c2                  |   |   | 1 |   |
| CCCCCCCCCO(=O)C                                   |   |   |   | 0 |
| CCCCCCCC\C=C/CCCCCCCC(=O)N(C)CC(=O)O              |   |   |   | 0 |
| OC1C=Cc2c(ccc3c4C=Cc5cccc(cc23)c45)(              |   |   | 1 |   |
| COc1c2ccoc2nc3c(O)cccc13                          |   |   | 1 |   |
| OS(=O)(=O)c1cccc(c1)[N+](=O)[O-]                  |   |   | 0 |   |
| OC1C=Cc2c(ccc3c(Br)c4cccc4cc23)C1O                |   |   | 1 |   |
| CCOc1ccccc1OCC                                    |   |   |   | 0 |
| Nc1ccc(O)c(c1)[N+](=O)[O-]                        |   |   | 1 |   |
| CCOC(=O)C(N)CS                                    |   |   | 1 |   |
| ClC(=O)c1cc(cc(c1)C(=O)Cl)C(=O)Cl                 |   |   |   | 0 |
| Cc1cc(c(O)c(                                      | 0 | 0 |   | 0 |
| O\N=C\C=N\O                                       |   |   | 0 |   |

|                                                    |   |   |   |
|----------------------------------------------------|---|---|---|
| COc1cc(CC(C)N)c(OC)cc1Br                           |   |   | 0 |
| NC(=O)N(CCCC(=O)O)N=O                              | 1 |   |   |
| CCc1ccccc1O                                        | 0 |   | 0 |
| Cn1cnc2ccc(cc12)[N+](=O)[O-]                       | 1 |   |   |
| NCCCP(=O)(O)CC1CCCCC1                              | 0 |   |   |
| Cc1cc2c3C4OC4C(O)C(O)c3ccc2c5ccccc1                | 0 |   |   |
| CC1CN(NC1=O)c2ccccc2                               |   |   | 0 |
| OP(=O)c1ccccc1                                     |   |   | 0 |
| [O-][N+](=O)c1ccc2c3ccccc4ccc(c5ccccc              | 1 |   |   |
| [O-][N+](=O)c1ccc2ccc3ccccc4ccc1c2c34              | 1 |   |   |
| CC(=O)NC(CSCC)C(=O)O                               | 1 |   |   |
| C[C@@H](Cc1ccccc1)NC(=O)NS(=O)(=O)c2ccc(C)cc2      |   |   | 0 |
| [O-]S(=O)(=O)SSS(=O)(=O)[O-]                       |   |   | 0 |
| Cc1c(C)c2OC                                        | 1 |   |   |
| NC(=N)n1ccc                                        | 0 | 0 | 0 |
| CC[C@H](C)[C@H](NC(=O)[C@H](Cc1ccccc1)NC(=O)[      |   |   | 0 |
| N[C@@H](CO)C(=O)O                                  | 0 |   |   |
| OCCN1CCN(C                                         | 1 | 1 |   |
| c1ccc2cc3c(ccc4ccccc34)cc2c1                       | 1 |   | 1 |
| C[C@@H]1C[C@H]2[C@@H]3CCC4=CC(=O)C=C[C@H]4         |   |   | 0 |
| CCCCCCCC(=O)Nc1snc2ccccc12                         | 0 |   |   |
| O=N(=O)c1ccc2[nH]ccc2c1                            | 1 |   |   |
| [O-][N+](=O)c1ccc2c3ccccc4ccccc(c12)c3             | 1 |   |   |
| FC(F)C(F)(F)Oc1c(Cl)cc(NC(=O)NC(=O)c2c(F)ccccc2F)c |   |   | 1 |
| CC(O)C#N                                           | 0 |   |   |
| COC1(NC(=O)CSCC(N)C(=O)O)C2SCC(=C                  | 0 |   |   |
| c1ccc(cc1)C(c2ccccc2)c3ccccc3                      | 0 |   |   |
| CN1CC(CBr)CC2C1Cc3c[nH]c4ccccc2c34                 | 1 |   |   |
| CCCB                                               | 0 |   | 0 |
| OC1CCCCC1c2ccccc2                                  |   |   | 0 |
| COCCOCCOCCOCCOCCO                                  |   |   | 0 |
| OP(=O)([O-])                                       | 0 | 0 | 0 |
| Cc1[nH]c2C(=O)C=C(N3CC3)C(=O)c2c4n                 | 1 |   |   |
| COc1ccc2c(c1)nc(N)n2C                              | 1 |   |   |
| OC1=C(Oc2ccc(O)cc2C1=O                             | 0 |   |   |
| CCCCC(=Cc1ccccc1)C=O                               |   |   | 0 |
| CO\N=C(\C(=O)N[C@H]1[C@H]2SCC(=C(N2C1=O)C(=        |   |   | 0 |
| CN(C)CCCS\c1ccccc1NC(=O)\C=C\c2ccccc2              |   |   | 0 |
| C[C@H](CN                                          | 1 |   |   |
| CCCCCCCCCCCCCCCC(=O)OCC                            |   |   | 0 |
| C[C@]1(Cc2c                                        | 0 | 0 |   |
| CCCC[C@@H](CC)COC(=O)C=C                           | 0 |   |   |
| CCNCC                                              | 0 |   |   |

|                                             |   |   |   |
|---------------------------------------------|---|---|---|
| COC(=O)[C@@H]1[C@@H]                        | 1 |   |   |
| O=C1O[C@@]23C[C@@H]                         | 0 |   | 0 |
| CCCOCC(C)OCC(C)O                            |   |   | 0 |
| CN1CCCC1CC                                  | 1 | 1 |   |
| CC(N)(C=O)(                                 | 0 |   |   |
| CC(=O)Nc1ccnc2ccccc12                       |   |   | 0 |
| Nc1ccc(Cl)cc1N                              |   | 1 | 1 |
| O1[C@@H]2C=Cc3cc4ccc5cccc6ccc(c3(C          | 1 |   |   |
| CC1CC(CC2CCC(N)C(C)C2)CCC1N                 |   |   | 0 |
| CC[C@@H](C)CCCC(=O)N[C@@H](CCN)C(=O)N[C@    |   |   | 0 |
| CSCCC(N)C(=                                 | 0 | 0 | 0 |
| C[N+]1(C)[C(                                | 0 | 0 |   |
| CCc1c2ccccc2cc3c1ccc4ccccc34                |   |   | 1 |
| CCCCC[C@@H](O)C\C=C/CCCCCCCC(=O)OCC(O)CO    |   |   | 0 |
| CCCCC[C@@H]1[C@@H]                          | 0 |   |   |
| CC(C)(C)C(=O)OCOP(=O)(C                     | 0 |   |   |
| OCC1OC(=O)C(O)C(O)C1O                       | 0 |   |   |
| CC\C(=N/OC\C=C\Cl)\C1=C(O)CC(CC1=O)C2CCOCC2 |   |   | 0 |
| CC(C)NCC(O)                                 | 0 | 0 | 0 |
| COc1cc(cc(OC)c1OP(=O)(O)O)[C@H]2[C@@H]3C(CO |   |   | 0 |
| COc1ccc2cc(c3C=CC(=O)Oc3c2c1)[N+](=         | 1 |   |   |
| Cc1ncc(C[n+]                                | 0 | 0 | 0 |
| Cc1ccc(N)cc1S(=O)(=O)O                      |   |   | 0 |
| CC[C@]12C=I                                 | 0 | 0 | 0 |
| OC(CCN1CCC                                  | 1 |   |   |
| Oc1ncc2ccc3cccc4ccc1c2c34                   |   |   | 0 |
| Nc1nc(O)nc2c1ncn2C3CC(O)C(CO)O3             |   |   | 0 |
| CO[C@H]1[C                                  | 1 |   | 1 |
| CC(C)(C)NCCO                                |   |   | 0 |
| CCCCCCCCOS(=O)(=O)[O-]                      |   |   | 0 |
| Oc1cc(c2ccc3cccc4ccc1c2c34)[N+](=O)[        | 1 |   |   |
| CC1C(=O)OC2CCN3CC=C(COC(=O)C(C)(C           | 0 |   |   |
| CN1C(=O)C[C                                 | 0 | 0 |   |
| [O-][N+](=O)c1ccccc1CCl                     |   |   | 1 |
| COc1ccc([C@H](OC(=O)C)C=C)c2ccccc1:         | 1 |   |   |
| CC[NH+](CC)I                                | 1 | 1 |   |
| CCN(CCC#N)c1ccc(cc1)N=Nc2c(Cl)cc(cc2        | 1 |   |   |
| Nc1cc(c(N)cc1F)N(=O)=O                      | 1 |   |   |
| CC(O)C(C)OC                                 | 0 |   |   |
| OCC=[N+](O)[O-]                             | 1 |   |   |
| CC(=O)OCC1OC(Oc2cccc3C(=O)c4cccc(C          | 1 |   |   |
| [O-][N+](=O)                                | 0 | 0 |   |
| OC(=O)Cc1ccccc1                             |   |   | 0 |



|                                                  |   |   |   |   |
|--------------------------------------------------|---|---|---|---|
| COc1cccc1C                                       | 0 | 0 | 0 | 0 |
| CC(C)(c1ccc(Oc2ccc3C(=O)OC(=O)c3c2)cc1)c4ccc(Oc5 |   |   | 0 |   |
| CC(=O)OCC(=                                      | 0 | 0 |   |   |
| N[C@@H](CCC(=O)N[C@@H](CS)C(=O)NCC(=O)O)C(       |   |   | 0 |   |
| CN1CCN(CC1                                       | 1 | 1 |   |   |
| Nc1ccc(Oc2ccc(N)c(Cl)c2)cc1Cl                    |   |   | 1 |   |
| CCCCCCCC(=O)\N=C\1/SN(C(=O)CCCCC                 |   |   | 1 |   |
| CC(C)NC(C)C(O)COc1ccc(C                          |   | 0 |   |   |
| CC(C)(C)NC[C@H](O)COc1                           |   | 0 |   |   |
| O[C@@H]1CC(=O)c2c(O)ccc3c4ccc(O)c                |   |   | 1 |   |
| CCCCC(=O)O                                       | 0 | 0 |   | 1 |
| Cc1c2cccc2cc3c4C=C[C@@H](O)[C@H                  |   |   | 1 |   |
| CNC[C@H](O)c1ccc(O)c(O                           |   | 0 |   | 0 |
| COc1ccc2nccc([C@H](O)[C                          |   | 0 |   |   |
| Cc1ccc(cc1C)N(=O)=O                              |   |   |   | 0 |
| Cc1nccc2c3c                                      | 0 | 0 | 1 |   |
| [O-][N+](=O)c1ccc2ccc3cccc(c3c2c1)[N-            |   |   | 1 |   |
| ClCCNCCCNc1c2cccc2nc3cccc13                      |   |   | 1 |   |
| C[C@H]1CNCCc2ccc(Cl)cc12                         |   |   |   | 0 |
| CCCCC(CC)COC(=O)CC(C(=O                          |   | 0 |   | 0 |
| CC(=O)Nc1cc                                      | 0 | 0 | 0 | 0 |
| OS(=O)(=O)c1cccc1N(=O)=O                         |   |   | 0 |   |
| OC1CC=Cc2c1cc3ccc4cccc5ccc2c3c45                 |   |   | 1 |   |
| CN[C@@H]1C[C@@H](c2                              |   | 1 |   |   |
| COCCCOCCOC                                       |   |   |   | 0 |
| CCN(=O)=O                                        |   |   |   | 0 |
| C[C@]12CC[C                                      | 0 |   |   |   |
| [O-][N+](=O)c1ccc2nsc2c1                         |   |   | 1 |   |
| Nc1c(Cl)c(F)nc(OCC(=O)O)c1Cl                     |   |   |   | 0 |
| CC(=O)Nc1ccc(cc1)S(=O)(=O)Cl                     |   |   | 0 |   |
| OC(=O)CC\C=C/C[C@@H]:                            |   | 0 |   |   |
| CC1CC2OC(=O)C(C)C2CC3(C)C(O)CC(O)C               |   |   | 1 |   |
| Clc1ccc2Sc3c                                     | 1 | 1 |   | 1 |
| [O-][N+](=O)c1ccc2cccc2c1                        |   |   | 1 |   |
| NC(=N)NCCC                                       | 0 | 0 |   | 0 |
| [O-]C(=O)CCCOc1ccc(Cl)cc1Cl                      |   |   |   | 0 |
| [O-][N+](=O)c1cc2c3cccc3sc2c4cccc1               |   |   | 1 |   |
| N[C@@H]([C                                       |   | 0 |   |   |
| [O-][N+](=O)c1cccc2c(Cl)nsc12                    |   |   | 1 |   |
| COCC(C)OC(=O)C                                   |   |   |   | 0 |
| C(Nc1[nH]cnc2ncnc12)c3cccc3                      |   |   | 0 |   |
| Clc1ccc(CN(C2CCCC2)C(=O)Nc3cccc3)cc1             |   |   |   | 1 |
| OC(=O)COc1cccc(c1)c2ocn                          |   | 0 |   |   |

|                                                    |   |   |
|----------------------------------------------------|---|---|
| CC(C)CN(C(=O)CCCl)c1snc2cccc12                     | 0 |   |
| CCCC[n+] <sup>1</sup> cccc1C                       |   | 0 |
| Cc1cc(N)ccc1c2ccc(N)cc2C                           | 1 |   |
| OC1CN(CCO1)N=O                                     | 1 |   |
| O=C(\C=C\c1ccc(Oc2cccc2)cc1)c3cccc                 | 0 |   |
| C[C@H](I)[C@@H]1OC[C@@H](CO)O1                     | 1 |   |
| CC(O)C1CCC2                                        | 0 | 1 |
| OC(=O)CNC:                                         | 0 | 0 |
| Oc1c(cccc1N(=O)=O)N(=O)=O                          | 0 |   |
| CCOP(=O)(OCC)Oc1nc(Cl)c(Cl)cc1Cl                   | 0 | 1 |
| CC(C)N                                             | 0 |   |
| CO[C@H]1[C                                         | 1 | 1 |
| Oc1ccc2C[C@@H]3[C@@H]4CCCC[C@]4(CCN3CC=C)          |   | 0 |
| CC(C)(C)CC(C                                       | 0 | 0 |
| CC(=CCC[C@@](C)(O)C=C)C                            | 0 |   |
| CN1(=O)CCCC1c2cccnc2                               | 0 |   |
| CCc1ccc2C(=O)c3cccc3C(=O)c2c1N(=O)                 | 1 |   |
| CO[C@]1(NC(=O)C2SC(=C(C(=O)N)C(=O)O)S2)[C@H]       |   | 0 |
| ClC(Cl)(Cl)SN1C(=O)c2cccc2C1=O                     | 1 | 1 |
| COc1ccc(cc1)c2nc(c3ccc(OC)cc3)c([nH]2              | 1 |   |
| Cc1cccc(CN2CCN(CC2)C(c3cccc3)c4ccc(Cl)cc4)c1       |   | 0 |
| CCCCCCCCCCCC(=O)N(CC)CC                            |   | 0 |
| CN(C)CCc1c[nH]c2ccc(CS(=O))(=O)N3CCCC3)cc12        |   | 0 |
| CC(=O)CC(C1=C([O-])c2cccc2OC1=O)c3cccc3            |   | 1 |
| CC12CCC(CC1                                        | 0 | 0 |
| CC(=O)N1CC2CC(C1)C3=CC                             | 0 |   |
| Cc1cc(N)c(C)cc1N                                   | 1 |   |
| C1CCC2C(C1)CCc3cccc23                              | 1 |   |
| CCC[N+] <sup>1</sup> (C)CCCC1                      |   | 0 |
| CSC(=O)c1cccc2nns12                                |   | 0 |
| O=C(Nc1ncc(s1)N(=O)=O)c2cccs2                      |   | 1 |
| OC(=O)CCc1cccc1                                    | 0 | 0 |
| CCCCCNC(=N)N\N=C\c1c[r                             | 0 | 0 |
| [O-]S(=O)(=O)Oc1ccc(cc1)C(c2ccc(OS(=O))(=O)[O-])cc |   | 0 |
| OC(Nc1snc2cccc12)C(Cl)(Cl)Cl                       | 0 |   |
| CC1(NCCc2cc(O)c(O)cc12)                            | 0 |   |
| CN(C)CCc1cc(ccc1O)C(=O                             | 1 |   |
| COc1c2ccoc2nc3cccc13                               | 1 |   |
| CCOC(=O)N(CC)N=O                                   | 1 |   |
| OCc1cccc1C                                         | 0 | 0 |
| Clc1c(Cl)c(Cl)c(Cl)c(Cl)c1Cl                       | 0 |   |
| N[C@H](CN=[N+]=[N-])C(=O)O                         | 1 |   |
| [O-][N+](=O)c1ccc2c3c1cccc3c4cccc5cc               | 1 |   |

|                                                   |   |   |   |  |   |
|---------------------------------------------------|---|---|---|--|---|
| CN(C\C=C\C#                                       | 1 | 0 | 0 |  |   |
| COc1cc(CC=C)cc2OCOC12                             |   |   | 0 |  | 0 |
| Cc1cc(N)n(n1)c2cccc2                              |   |   |   |  | 0 |
| N[C@H](CCC(=O)O)C(=O)C                            |   | 0 |   |  | 0 |
| Cc1cc(CCC(=O)OCCOCCOCCOC(=O)CCc2cc(C)c(O)c(c2)    |   |   |   |  | 1 |
| CC(C)OC(=O)N[C@@H](C(C)C)C(=O)NC(C)c1ccc(C)cc1    |   |   |   |  | 0 |
| CC(=CC(C)(C)C)C                                   |   |   |   |  | 0 |
| Oc1ccc(cc1N                                       | 0 | 0 |   |  |   |
| CN(C)c1ccc(cc1)C(=N)c2ccc(cc2)N(C)C               |   |   | 1 |  | 1 |
| [O-][N+](=O)c1ccc2c(c1)cc(c3cccc23)[I             |   |   | 1 |  |   |
| CCNC1(CCCCC1=O)c2cccs2                            |   |   |   |  | 0 |
| CCCN(CCC)[C@@H]1CCc2c                             |   | 0 |   |  |   |
| O=N(=O)c1ccc2[nH]ncc2c1                           |   |   | 1 |  |   |
| NNOS(=O)(=O)O                                     |   |   | 1 |  |   |
| O[C@@H]([C@H]1CC2CC1                              |   | 0 |   |  |   |
| CC(O)C(=O)NCCO                                    |   |   | 1 |  |   |
| COc1cc(\C=C/C#N)\C(=O)                            |   | 0 |   |  |   |
| COC(=O)NC(=S)Nc1cccc1NC(=S)NC(=O                  |   |   | 1 |  | 0 |
| O=N(=O)c1ccc(CNc2nc[nH]c3ncnc23)cc:               |   |   | 0 |  |   |
| CN1CCOCC1                                         |   |   | 0 |  | 0 |
| CCCOS(=O)(=O)C                                    |   |   | 1 |  |   |
| Nc1ncnc2c1cnn2CC(O)CN=N#N                         |   |   | 1 |  |   |
| CCCC(=O)C(CC)Sc1ccoc1C                            |   |   |   |  | 0 |
| Clc1ccc(cn1)C(Cl)(Cl)Cl                           |   |   |   |  | 0 |
| Nc1ncnc2c1r                                       | 0 | 0 |   |  |   |
| C\C1=C/CCC(=C)[C@H]2C                             |   | 0 |   |  |   |
| Oc1ccc2c(Oc3cc(O)ccc3C24OC(=O)c5ccc               |   |   | 0 |  | 1 |
| COc1cc(OC2OC(CO)C(O)C(O)C2O)c3C(=O                |   |   | 1 |  |   |
| CCOC(=O)C1=                                       | 1 |   |   |  |   |
| Oc1cccc1C2=CC(=O)c3c(C                            |   | 0 |   |  |   |
| CCN(CC)c1ccc(cc1)[N+](=O)[O-]                     |   |   | 1 |  |   |
| Cc1cc(C)c(cc1C)N=Nc2c(O)c(cc3cc(ccc23)S(=O)(=O)[C |   |   |   |  | 0 |
| FC(F)(F)F)C                                       |   | 0 |   |  | 1 |
| Cc1ccc(c(C)c1)S(=O)(=O)O                          |   |   | 0 |  |   |
| CN(C)[C@H]1[C@@H]2[C@@H]3[C@H](O)c4c(Cl)c         |   |   |   |  | 0 |
| [N-]=[N+]=[N-]                                    |   |   |   |  | 0 |
| COc1cccc1N(=O)=O                                  |   |   | 1 |  | 0 |
| CCOC(=O)CC(=O)OCC                                 |   |   |   |  | 0 |
| Nc1c(Cl)cc(cc1[N+](=O)[O-])[N+](=O)[C             |   |   | 1 |  |   |
| CC1=C(N2[C@H](SC1)[C@H](NC(=O)[C@H](N)C3=CC       |   |   |   |  | 0 |
| C\C=C\1/CC(C)C(C)(O)C(=O)OCC2=CCN3                |   |   | 0 |  |   |
| CNCCC=C1c2cccc2CCc3ccc                            |   | 1 |   |  | 1 |
| Cc1cc2C(=O)C(O)Cc2c3ccc4cccc4c13                  |   |   | 1 |  |   |

|                                                         |   |   |   |
|---------------------------------------------------------|---|---|---|
| <chem>OC(=O)c1cc(Cl)ccc1Cl</chem>                       | 0 | 0 |   |
| <chem>CCC(=O)N(O)c1ccc2ccccc2c1</chem>                  | 1 |   |   |
| <chem>Oc1c(Cl)cc(Cl)c(Cl)c1[N+](=O)[O-]</chem>          | 0 |   |   |
| <chem>CCc1cccc(NC(=O)c2csc(c2)[N+](=O)[O-])</chem>      | 1 |   |   |
| <chem>Cc1c(O)cc(cc1[N+](=O)[O-])[N+](=O)[O-]</chem>     | 0 |   |   |
| <chem>O=C(Nc1ccc2c(Cc3ccccc23)c1)c4ccccc4</chem>        | 1 |   |   |
| <chem>Cc1cc(Nc2ccc(O)cc2)ccc1N</chem>                   | 1 | 1 |   |
| <chem>COc1ccc(cc1)[C@H]2O[C@@H]2C(=O)c</chem>           | 1 |   |   |
| <chem>Oc1ccc2CC3N</chem>                                | 1 | 1 |   |
| <chem>CC(=C)C(=O)OC(C)(C)C</chem>                       | 0 |   |   |
| <chem>OC(=O)Cc1ccc(Cl)cc1Cl</chem>                      |   |   | 0 |
| <chem>CCCCC(=O)O </chem>                                | 0 | 0 |   |
| <chem>Cc1cc2N=C3C(=O)NC(=O)N</chem>                     |   | 0 |   |
| <chem>C1Cc2ccccc2CN1</chem>                             | 0 |   | 0 |
| <chem>CC(=O)Nc1ccc(C)cc1C</chem>                        |   |   | 0 |
| <chem>CC(C)C(OC(=O)C(C)C)C(C)(C)COC(=O)C(C)C</chem>     |   |   | 0 |
| <chem>CC(=O)SC1CC</chem>                                | 0 |   |   |
| <chem>CCCCCCCCS(=O)(=O)[O-]</chem>                      |   |   | 0 |
| <chem>CCCC1O[C@H]</chem>                                | 0 |   |   |
| <chem>CC(N)Cc1ccc2OCOc2c1</chem>                        |   |   | 0 |
| <chem>CC(C)C(=O)O</chem>                                |   |   | 0 |
| <chem>FC(F)OC(F)(F</chem>                               | 0 | 0 | 0 |
| <chem>O=Cc1cccc2ccnnc12</chem>                          | 1 |   |   |
| <chem>CCc1c2C3NC3c4ccccc4c2cc5ccccc15</chem>            | 1 |   |   |
| <chem>CC(=O)N(OC(=O)c1ccccc1)c2ccc3c(Cc4c</chem>        | 1 |   |   |
| <chem>NC1=NC(=O)N(C=C1)[C@H]</chem>                     | 0 |   |   |
| <chem>Nc1nc(O)c2nc(O)n(C3CC(O)C(CO)O3)c2</chem>         | 0 |   |   |
| <chem>C[C@H](\C=C\[C@@H](O)C1CC1)[C@H]2CC[C@H]3\</chem> |   |   | 1 |
| <chem>C(OCC1CO1)C2CCC(COCC3CO3)CC2</chem>               |   |   | 0 |
| <chem>CC(O)CNCC(C)O</chem>                              | 0 |   | 0 |
| <chem>COc1cc(NC(C)CCN)c2ncccc2c1</chem>                 | 1 | 0 | 0 |
| <chem>OC(C(O)C(=O)[O-])C(=O)[O-]</chem>                 |   |   | 0 |
| <chem>Cc1ccccc1OC[C@H]2CO2</chem>                       | 1 |   |   |
| <chem>FC(F)(F)C(F)(</chem>                              | 0 | 0 | 0 |
| <chem>CCCCCOC(=O)CCCC</chem>                            |   |   | 0 |
| <chem>CC1=CC(=O)Oc2c3CCCN4CCCc(cc12)c34</chem>          | 1 |   |   |
| <chem>CSCC(NC(=O)C(C)(C)SC)C(=O)O</chem>                | 0 |   |   |
| <chem>OC1C=Cc2c(cc3c4ccccc4cc5c6ccccc6c2c:</chem>       | 1 |   |   |
| <chem>O=N(=O)C1=Cc2cc3cc4ccccc4cc3c5cccc1</chem>        | 1 |   |   |
| <chem>CCN(=O)(CC)CCNc1ccc(CO)c2Sc3ccccc3(</chem>        | 1 |   |   |
| <chem>C(Cc1ccccc1)Cc2cccn2</chem>                       |   |   | 0 |
| <chem>[O-][N+](=O)C1c2ccccc2C(=O)c3ccccc13</chem>       | 0 |   |   |
| <chem>CN(C)CCOC(=O)C(=C)C</chem>                        | 1 |   | 0 |

|                                                          |   |   |   |
|----------------------------------------------------------|---|---|---|
| Clc1ccc(Cl)c(Cl)c1Cl                                     | 0 | 0 | 0 |
| CC[C@H]1OC(=O)[C@H](C)[C@@H](O[C@H]2C[C@H]2)C1           |   |   | 0 |
| CC[N+](C)C                                               | 0 | 0 | 0 |
| CO\N=C\C(=O)N                                            | 0 | 0 |   |
| Nc1ccc(cc1)[S+](=O)([O-])                                |   | 0 |   |
| [O-]S(=O)(=O)c1ccc2C(=O)c3ccccc3C(=O)c2c1                |   |   | 0 |
| C[C@@H](CCC(=O)O)[C@H]1CC[C@H]2                          | 0 |   |   |
| CCCCCCCCOC(=O)C=C                                        |   |   | 0 |
| CCCCCN(CCCCC)N=O                                         | 1 |   |   |
| CC(C)(C)c1onc(O)c1CC(N)C                                 | 0 |   |   |
| [O-][N+](=O)c1ccc2c3ccccc3c4ccc(c1c2)C(=O)N              | 1 |   |   |
| CCC(C)(CCC(C)C)C(=O)[O-]                                 |   |   | 0 |
| CCOC(=O)C1=                                              | 0 | 0 |   |
| C[C@]12CC[C@H]3[C@@H](CCC4=C(O)C(=O)CC[C@]4(C)O)CC[C@]12 |   |   | 0 |
| NC1=NC(=O)C2=C(NCC(CNc3ccc(cc3)C(=O)N[C@@H]1C)C)C(=O)N   |   |   | 0 |
| CCCCC1ccc(N)cc1                                          |   |   | 0 |
| CO                                                       | 0 | 0 | 0 |
| O=C1C=Cc2cccc3cccc1c23                                   |   | 1 |   |
| Cc1cc2N=C3C                                              | 0 | 0 |   |
| Cc1ccc(cc1)\C=C\C=C\C2CCCC2[N+](=O)[O-]                  | 1 |   |   |
| ClCc1ccc(cc1)N(=O)=O                                     | 1 |   | 0 |
| NC1=NC(=O)N(C=C1)[C@@H]1CCN1                             | 0 |   |   |
| OCCN1CCN(C)C1                                            | 1 | 1 |   |
| ONC(=O)Cc1cn(cn1)N=O                                     |   | 1 |   |
| O=C1OC(=O)C=C1                                           |   | 0 | 0 |
| [O-][N+](=O)c1cccc2nc3ccccc3nc12                         |   | 1 |   |
| Clc1cccc1c2nnc(nn2)c3ccccc3Cl                            |   |   | 0 |
| COc1ccc2cc3                                              | 0 | 0 | 0 |
| [O-][N+](=O)c1ccc2c(Cl)nsc2c1                            |   | 1 |   |
| CC(=O)c1ccc(cc1)N=O                                      |   | 1 |   |
| CC(=O)NC1CCSC1=O                                         |   |   | 0 |
| Fc1cccnc1                                                |   | 0 |   |
| CCC(Br)(CC)C(=O)NC(=O)N                                  |   | 0 | 0 |
| [O-]N1C=CC=                                              | 1 | 0 |   |
| CC[N+](C)(CC)CC(=O)Nc1c                                  |   | 0 |   |
| C[C@H](Cc1c                                              | 0 | 0 |   |
| CC[C@@]12CCCN3CCc4c([C@H]13)n(C(=O)C2)c5cccc             |   |   | 0 |
| Cn1cnc2c(NO)ncnc12                                       |   | 1 |   |
| CCOC(=O)CNC(=O)CCCCSc1[nH]cnc2ncn1                       |   | 0 |   |
| CC(CCC(=O)O)(c1ccc(O)cc1)c2ccc(O)cc2                     |   |   | 0 |
| COC(=O)c1cc(ccc1N)c2ccc(N)c(c2)C(=O)N                    |   | 1 |   |
| OC1C(O)c2cc3c(ccc4ccccc34)cc2c5ccccc                     |   | 1 |   |
| C[C@]12[C@@H](O)C=C[C@@]3(OC1=O)[C@@H]4C                 |   |   | 0 |

|                                               |   |   |   |   |
|-----------------------------------------------|---|---|---|---|
| CCCCC(CC)COC(=O)COc1ccc(Cl)cc1C               |   |   |   | 0 |
| CCOCCOCCOC(=O)C                               |   |   |   | 0 |
| Clc1cccc1NS(=O)(=O)c2cccc3cccnc23             |   | 0 |   |   |
| CCN(CC)C(=O)N[C@H]1C[C@H]2[C@@H](Cc3c[nH]c4   |   |   |   | 0 |
| CCOC(=O)c1c                                   | 0 | 0 |   | 0 |
| CCCCOC(=O)C(C)Oc1ccc(Oc2ccc(cnc2)C(F)(F)F)cc1 |   |   |   | 0 |
| ClCC(=O)NCc1cccc1                             |   |   | 1 |   |
| Nc1nc(cs1)c2ccc(cc2)N(=O)=O                   |   |   |   | 1 |
| COc1cc(OC)c(C=O)cc1OC                         |   | 0 |   | 0 |
| COS(=O)(=O)[O-]                               |   |   |   | 0 |
| CCc1ccc(O)c(c1)C(C)(C)C                       |   |   |   | 1 |
| OC(=O)C1=C(O)C(=O)C=CO1                       |   | 0 |   |   |
| COc1c(O)cc2CCN(C)C3Cc4cccc4c1c23              |   |   | 1 |   |
| OCc1cccc1                                     | 0 | 0 | 0 | 0 |
| COc1ccc2C=CC3CCCC3c2c1                        |   |   | 1 |   |
| CCOc1cccc1[N+](=O)[O-]                        |   |   | 1 |   |
| CCCC(CCC)C(=O)OC1C[C@@H]2CC[C@H](C1)[N+]2(C)  |   |   |   | 0 |
| CCCCCCCOC(=O)c1ccc(O)cc1                      |   |   |   | 1 |
| CC(=O)Nc1ccc(N)cc1                            |   | 1 |   | 0 |
| Cc1c(N)ccc(N=Nc2cccc2)c1N                     |   | 1 |   |   |
| COCC(C)N                                      |   |   |   | 0 |
| OC(=O)CCNC                                    | 0 | 0 |   | 0 |
| CCCCC1(COC(                                   | 0 | 0 |   | 0 |
| CN[C@@]1(CCCCC1=O)c2cccc2Cl                   |   |   |   | 0 |
| CN1C(=O)N(c                                   | 0 | 0 | 0 | 0 |
| [O-][N+](=O)\C=C\c1oc(cc1)[N+](=O)[C          |   |   | 1 |   |
| C[C@@H]1CN(N=O)[C@@H](C)CN1N=(                |   |   | 1 |   |
| Nc1cc(ccc1O)S(=O)(=O)O                        |   | 0 |   | 0 |
| CCCCCCCCCCCC                                  |   |   |   | 0 |
| [O-][N+](=O)c1cccc1C(F)(F)F                   |   | 0 |   |   |
| COC(=O)C(=Cc1oc(cc1)N(=O)=O)C#N               |   |   | 1 |   |
| CCCCS(=N)(=                                   | 0 |   |   |   |
| COc1cccc(N)c1                                 |   |   | 1 |   |
| Nc1c(cc(c2cccc12)S(=O)(=O)O)N=Nc3c            |   |   | 1 |   |
| CCOc1cccc(c1)[N+](=O)[O-]                     |   |   | 0 |   |
| COc1ccc2C(=                                   | 0 | 0 |   | 0 |
| COc1cc(O)c2C(=O)Oc3cc(O)cc(C)c3c2c1           |   |   | 0 |   |
| COc1cc2C(=O)c3nccc4cc(C                       |   |   | 0 |   |
| CCN(CC)CCO(                                   | 1 |   |   |   |
| CC(=O)C[C@                                    | 0 | 0 |   |   |
| CCOP(=O)([O-])OCC                             |   |   |   | 0 |
| OC(=O)C(Br)Br                                 |   | 1 |   | 0 |
| CC(=CCc1cccc2c(c[nH]c12)                      |   | 0 |   |   |

|                                                  |   |   |     |
|--------------------------------------------------|---|---|-----|
| [O-][N+](=O)C1=Cc2cccc3c4cc5ccccc5cc             | 1 |   |     |
| O=C1Oc2cc(ccc2C=C1c3ccccc3)n4nc5ccc              | 0 |   |     |
| CC[C@H](C)[C@H]1O[C@@]2(C[C@@H]3C[C@@H](         | 1 |   |     |
| CN[N+](=O)[O-]                                   | 0 |   |     |
| OC1=C(C(=O)Nc2cc(Cl)ccc:                         | 0 |   |     |
| [O-][N+](=O)c1ccc(COc2ccccc2)cc1                 | 0 |   |     |
| O=C1C=Cc2ccc3C(=O)C=Cc4ccc1c2c34                 | 1 |   |     |
| CCN(CC)c1cc(NC(=O)C)c(cc1OC)N=Nc2c               | 1 |   |     |
| COC(=O)C(=C)C#N                                  | 1 |   |     |
| Nc1ncnc2c1nc(c3ccc(cc3)N(=O)=O)n2c4              | 1 |   |     |
| ClC(=C(Cl)C(=C(Cl)SSc1ccccc1N(=O)=O)(            | 1 |   |     |
| Cc1ccc(C)c(c1)N(=O)=O                            | 1 | 0 |     |
| BrC[C@H]1CO1                                     | 1 |   |     |
| CC[C@H](NC(=O)c1cc(F)ccc1[N-]S(=O)(=O)c2ccccc3cc | 1 |   |     |
| OC1OC(=O)C(=C1CCI)Cl                             | 1 |   |     |
| OC(=O)C1CCI                                      | 0 | 0 |     |
| CCc1ccc(cc1)                                     | 0 | 0 | 0   |
| OC[C@H](O)                                       | 0 | 0 |     |
| COc1cc(ccc1                                      | 0 | 0 |     |
| OCCCCOC=C                                        |   |   | 0   |
| Nc1nccs1                                         | 0 | 0 | 1 0 |
| Nc1ccc2c(c3ccccc3C(=O)O)c4ccc(N)cc4[             | 0 |   |     |
| Nc1ccc(cc1)S                                     | 0 |   | 0   |
| OC(=O)c1cc(Oc2ccc(cc2Cl)C(F)(F)F)ccc1N(=O)=O     |   |   | 0   |
| CCOC(=O)CCc1ccccc1                               |   |   | 0   |
| [O-][N+](=O)c1c(Cl)cccc1c                        | 0 |   |     |
| Nc1cccc(Cl)c1                                    |   | 0 | 0   |
| CC\C=C/CCOC(=O)CC                                |   |   | 0   |
| Clc1cccc(c1)†                                    | 1 | 0 | 0   |
| Fc1cccc(F)c1                                     | 0 | 0 | 1   |
| CC(=CCl)C                                        |   | 1 | 0   |
| O=C1NSc2ccccc12                                  |   |   | 1   |
| O=C(OCC(COC(=O)c1ccccc1)(COC(=O)c2ccccc2)COC(=   |   |   | 1   |
| Cc1ccc(cc1)S(=O)(=O)OCc2ccc(cc2)[N+]             | 1 |   |     |
| CCC(CC)c1cccc(OC(=O)N(C)N=O)c1                   | 1 |   |     |
| Cc1cncn1                                         | 0 |   |     |
| Nc1cc(Cl)c(cc1O)[N+](=O)[O-]                     | 1 |   |     |
| COc1c(O)cc2                                      | 0 | 0 |     |
| Cn1c(N)nc2nc3ccncc3cc12                          | 0 |   |     |
| Nc1ccc(Sc2ccc(N)cc2)cc1                          | 1 |   | 0   |
| Clc1cccc(SC2CCNCC2)n1                            | 0 |   | 0   |
| CCSC(=O)Cl                                       | 1 |   | 0   |
| Oc1ccc2C(=O)c3cccc4c(O)ccc(c2c1)c34              | 1 |   |     |

|                                             |   |   |
|---------------------------------------------|---|---|
| ClCBr                                       | 1 | 0 |
| CCCCN(CCON(=O)=O)N(=O)=O                    | 1 |   |
| CC(C)CCOC(=O)c1ccccc1                       |   | 0 |
| O[C@H]1Cc2c(O)cc(O)cc2                      | 0 |   |
| COc1cc(OC)c2C3C=COC3Oc2c1                   | 1 |   |
| C[C@@H]1OC(=O)C[C@H](O)C[C@H](O)C[C@H](O)C  |   | 0 |
| Fc1ccc(CCl)cc1                              | 0 |   |
| CCC1NC(=O)C                                 | 0 | 0 |
| CCOC(=O)C(C)(C)Oc1ccc(Cl)                   | 0 | 0 |
| CC(Cc1ccccc1)NCc2ccccc2                     | 0 |   |
| OC(=O)c1ccc                                 | 0 | 0 |
| CCN(CC)c1ccc2N=C3C(=CC(=[NH2+]))c4c         | 1 |   |
| CCCOC(=O)C=Cc1oc(cc1)N(=O)=O                | 1 |   |
| CN(C)CCNC(=O)c1cccc2c(O)c3ccccc3nc1         | 1 |   |
| CC(=O)N[C@@H](C=O)[C@H](O)[C@H](O)[C@@H](O) |   | 0 |
| C[C@H](N)C(=O)c1ccccc1                      |   | 0 |
| COc1ccccc1N=C(O)c2csc(c2)N(=O)=O            | 1 |   |
| COC1=CC(=O)C(=O)C(=C1)C(C)(C)C              | 0 |   |
| CC(C)(C)C(O)(CCc1ccc(Cl)cc1)Cn2cncn2        |   | 1 |
| O=N(=O)c1ccc2c(c1)[nH]c3ccccc23             | 1 |   |
| C1C=CC=C1                                   |   | 0 |
| CCOC(=O)Cl                                  |   | 0 |
| COc1ccc(CCN                                 | 1 | 0 |
| CC(N)c1cccc                                 | 0 | 0 |
| C1C2=C3C=CC=CC3=CC4=C5OC5=C(C24)C           | 1 |   |
| CC(C)(COC[C@H]1CO1)COC[C@H]2CO2             | 1 |   |
| OC1COC(NCCc2c[nH]c3ccccc23)C(O)C1C          | 1 |   |
| [O-][N+](=O)c1ccc(Cl)cc1Cl                  | 1 |   |
| COC(C)C(O)(C(=O)OCC1=CCN2CCC(OC(=           | 1 |   |
| Cc1ccc(N)cc1N(=O)=O                         | 1 | 0 |
| C[C@@H]1Cl                                  | 1 | 1 |
| CNC(=O)[C@                                  | 0 |   |
| Nc1[nH]c(nc2ncnc12)c3ccc(cc3)N(=O)=O        | 1 |   |
| Oc1ccc2CC3N(CC4CC4)CC                       | 0 |   |
| OCCN=C1N=C(Nc2ccccc12)c3ccc(s3)N(=          | 1 |   |
| CC(CCO)CCc1ccccc1                           |   | 0 |
| Nc1ccc(N)c2ccccc12                          | 1 | 1 |
| N[C@@H](C                                   | 0 | 0 |
| CCCCCCCC(Cl)CCC(Cl)CC(Cl)C(Cl)C(Cl)CC       | 0 |   |
| COc1cc(cc(OC)c1OC)C2C3C(COC3=O)C(C          | 0 |   |
| [O-][N+](=O)c1c2ccccc2c(c3ccccc13)[N-       | 0 |   |
| C(CCOCC1CO1)COCC2CO2                        | 1 | 0 |
| CC(=O)[C@H                                  | 0 | 0 |



|                                        |   |   |   |   |
|----------------------------------------|---|---|---|---|
| COc1ccccc1N                            | 1 |   |   |   |
| Nc1nc(O)c2n                            | 0 | 0 |   |   |
| CN1CC(=CC2C1Cc3c[nH]c4cccc2c34)C       |   |   | 1 |   |
| O=C1C(=O)c2cccc3ccc4cccc1c4c23         |   |   | 0 |   |
| COc1ccc(cc1)                           | 0 | 0 |   |   |
| Nc1ccc(cc1)S                           | 0 |   |   | 0 |
| C[C@@]12C                              | 0 | 0 |   |   |
| COc1c(Cl)c(Cl)c(Cl)c(Cl)c1Cl           |   |   | 1 |   |
| COP(=O)(OC)                            | 0 | 0 | 1 | 0 |
| CC(=CCC\C(=                            | 0 |   |   |   |
| C[N+](C)(C)C                           | 0 | 0 |   |   |
| CCN=C(O)C=Cc1oc(cc1)N(=O)=O            |   |   | 1 |   |
| CC(=O)Nc1ccc(Oc2ccc(cc2)N=O)cc1        |   |   | 1 |   |
| CCOC(=O)CC                             | 0 | 0 | 0 | 0 |
| ClS(=O)(=O)c1ccccc1                    |   |   |   | 0 |
| CC(=O)c1cccc(c1)[N+](=O)[O-]           |   |   | 1 |   |
| OC(=O)C\C(=C/C(=O)O)\C(=O)O            |   |   |   | 0 |
| Cc1cccc(O)c1N                          |   |   | 0 | 0 |
| Cc1c(N)cc(cc1N)N(=O)=O                 |   |   | 1 |   |
| COc1ccc2CC3N(CCc4cc5OCOc5cc34)Cc2c1OC  |   |   |   | 1 |
| NP(=O)(O)N(CCCl)CCCl                   |   |   | 1 |   |
| CCCC(=O)Cl                             |   |   | 1 | 0 |
| OC[C@H]1O[C@@H](O[C                    |   | 0 |   | 0 |
| CC(C)(C)CC(C                           | 0 | 0 |   | 0 |
| CCCN=O                                 |   |   | 1 |   |
| CC(=O)NC(CSC(=C(Cl)C(=C(Cl)Cl)Cl)Cl)C: |   |   | 1 |   |
| CCCN=NC(C)(C)OO                        |   |   | 1 |   |
| CC(O)CO[C@@H]1[C@@H                    |   | 0 |   |   |
| COO                                    |   |   | 1 |   |
| CCCCC(CC)COC(=O)COc1ccc(Cl)cc1Cl       |   |   | 0 | 0 |
| CC(=O)C1CCC2C3CC=C4CC(=O)CCC4(C)C:     |   |   | 0 |   |
| CNC(C)Cc1ccc2OCOc2c1                   |   |   |   | 0 |
| COC(=O)C(C)(C)Oc1ccc(cc1)c2ccc(Cl)cc2  |   |   | 0 |   |
| Clc1ccc(cc1)(                          |   | 1 |   |   |
| c1ccc2nc3ccccc3cc2c1                   |   |   | 1 |   |
| Cc1ccc(NCC2(O)OCC(O)C(O)C2O)cc1        |   |   | 0 |   |
| CCC(C)OC(=O)N1CCCCC1CCO                |   |   |   | 0 |
| CC(=O)Nc1cc                            | 0 | 0 | 0 | 0 |
| CSc1cc(SC)c(N)c(C)c1N                  |   |   | 1 |   |
| C[C@@H](C                              | 0 | 0 |   |   |
| CCCCCCCCCCCCOC(=O)C                    |   |   |   | 0 |
| COC(=O)c1ccccc1                        |   |   | 0 | 0 |
| CN(Cc1ccc(Br)cc1)N=O                   |   |   | 1 |   |

|                                                 |   |  |   |
|-------------------------------------------------|---|--|---|
| ON(C=O)c1ccc(Oc2ccc(Cl)cc2)cc1                  | 1 |  |   |
| Oc1c(Cl)cc(Cl)cc1S(=O)(=O)c2cc(Cl)cc(C          | 0 |  |   |
| CC(=CCCC(=C\C=N\O)C)C                           |   |  | 0 |
| CC1=CCc2c1cc(C)c3c2ccc4ccccc34                  | 1 |  |   |
| COC1=CC(=O)C=C/C/1=N\c2c3ccccc3nc               | 0 |  |   |
| CC1(CO1)c2ccc(cc2)[N+](=O)[O-]                  | 1 |  |   |
| C[C@@](Cc1 0 0                                  |   |  | 0 |
| Cc1ccnc2ccccc12                                 | 1 |  |   |
| O=Nc1ccc2ccccc2c1                               | 1 |  |   |
| CCCC(C)C(=O)O                                   |   |  | 0 |
| COC(=O)C1=C(C)NC(=C(C1c2ccccc2[N+](             | 0 |  |   |
| Oc1cccc2Cc3cc(ccc3c12)[N+](=O)[O-]              | 1 |  |   |
| Clc1ccc(\C=N 1 0                                |   |  |   |
| ONC(=N)c1ccccc1                                 | 1 |  |   |
| CC(=O)ON(OCc1ccc(cc1)[N+](=O)[O-])C             | 1 |  |   |
| O=C1N2CCc3 0 0                                  |   |  |   |
| CC(C)(C)N=C(O)C=Cc1oc(cc1)N(=O)=O               | 1 |  |   |
| O=C1CCc2ccccc2O1                                | 0 |  | 0 |
| NC(=O)c1csc(c1)[N+](=O)[O-]                     | 1 |  |   |
| Nc1nc2cc(O)ccc2[nH]1                            | 1 |  |   |
| OC[C@@H](O)[C@H]1OC(=O)C(=C1[O-])O              |   |  | 0 |
| O\N=C\c1ccncc1                                  | 0 |  |   |
| CN(C)Cc1ccccc1                                  | 0 |  | 0 |
| C[n+]1ccc(cc1)c2cc[n+](C)cc2                    | 0 |  |   |
| NC(=O)NC(C 0 0                                  |   |  |   |
| CCCCCCC(=Cc1ccccc1)C=O                          |   |  | 0 |
| Cc1ccccc1NC(=N)Nc2ccccc 0                       |   |  |   |
| CN1Cc2c(ncn2c3ccsc3C1=( 0                       |   |  |   |
| CCC1NC(=O)( 0 0                                 |   |  |   |
| CC(C)[C@@]12C[C@@H]1[C@@H](C)C(=O)C2            |   |  | 0 |
| CC(=C(CCOP(=O)(O)O)SC(=O)c1ccccc1)N(Cc2cnc(C)nc |   |  | 0 |
| CC(=C)C1CCC(=CC1)C 0 0                          |   |  | 0 |
| CC(C)NC(=O)c1ccccc1N 0                          |   |  |   |
| Cc1cc(ccc1P(=O)(O)O)C(C) 0                      |   |  |   |
| C1O[C@@H]1c2ccc3ccc4ccccc5ccc2c3c4. 1           |   |  |   |
| C[C@]12CC[C@H]3[C@@H](CCC4=C(O)C(=O)CC[C@+      |   |  | 0 |
| Cn1cnc(c1Sc 0 0                                 |   |  |   |
| OC[C@H](Cl)CCl 1                                |   |  |   |
| Oc1ccc2cc(cc(c2c1N=Nc3ccc(c4ccccc34)            | 0 |  |   |
| CC(C)(C)c1ccc(C=O)cc1 0                         |   |  |   |
| COC(=O)c1cr 0 0                                 |   |  | 0 |
| Oc1ccc2cc(cc(c2c1N=Nc3ccc(cc3)S(=O)(            | 0 |  |   |
| OC(=O)C(Br)CBr 0                                |   |  |   |

|                                              |   |   |   |   |
|----------------------------------------------|---|---|---|---|
| OC(=Nc1cccc(F)c1)c2csc(c2)N(=O)=O            |   |   | 1 |   |
| lc1cccc2c(ccc                                | 1 |   |   |   |
| CC(=O)c1ccc2ccccc2c1                         |   |   | 0 | 0 |
| CC(C)(C)C(=O                                 | 0 | 0 |   |   |
| FC(F)(F)C(F)(F)C(F)(F)C(F)(F)CCI             |   |   |   | 0 |
| NC(=N)NCc1                                   | 0 | 0 |   | 0 |
| CCN(CC)CCNC(=O)c1ccc(N                       |   | 0 |   |   |
| CCCCCCCCC(                                   | 0 | 0 |   | 0 |
| ClC(Cl)(Cl)C=O                               |   |   | 1 |   |
| CN1CCN=C(c2ccccc2)c3cc(Cl)ccc13              |   |   | 0 | 0 |
| CCOC(=O)Cc1                                  | 0 | 0 |   | 0 |
| Cc1ccc(cc1)N=Nc2ccc(cc2)N(CCO)CCO            |   |   | 0 |   |
| CC(C)[N+](C)                                 | 0 | 0 |   | 0 |
| CC1(C)CCCC2(C)C1CCC3(C)C2CC=C(C=O)(          |   |   | 0 |   |
| CC(=C)C(=O)OCCOCCOC(=O)C(=C)C                |   |   | 0 | 0 |
| Fc1ccc(cc1)C                                 | 1 | 1 |   | 1 |
| CC(=O)NC(CS\C(=C\Cl)\Cl)C(=O)O               |   |   | 1 |   |
| Cc1cc(O)c2C(=O)c3c(O)cc(O)c4c5c(O)cc         |   |   | 0 |   |
| CCCCCCCCCCCCCCCCCN                           |   |   | 0 |   |
| COC(=O)CSc1cc(\N=C\2/SC(=O)N3CCCN23)c(F)cc1C |   |   |   | 0 |
| COC(=O)C(Cl)C(=O)OC                          |   |   |   | 0 |
| OC(=O)c1cc(ccc1O)N=Nc2                       |   | 0 |   |   |
| CCCNC(=O)N[S+](=O)([O-]                      |   | 0 |   |   |
| CCCCCN=C(O)C=Cc1oc(cc1)N(=O)=O               |   |   | 1 |   |
| S=C1Nc2ccccc2N1                              |   |   |   | 0 |
| NCCCNCCCCN                                   | 0 | 0 |   |   |
| CCCCNc1c(C(=O)OCC)c(C)r                      |   | 0 |   | 0 |
| CNC(=O)Oc1ccc2N(C)C3N(                       |   | 0 | 0 |   |
| COc1ccc(CN(                                  | 1 | 0 | 0 |   |
| CCN(CC)CCO(                                  | 0 | 0 |   | 0 |
| CCN(CC)CCN(                                  | 0 | 0 |   | 0 |
| CNc1ccc2ncc(C)nc2c1N                         |   |   | 0 |   |
| O=CNNC=O                                     |   |   |   | 0 |
| CC1CC2C(Cc3cn(CC4CC4)c5cc(Br)cc2c35          |   |   | 0 |   |
| CCOP(=O)(O(                                  | 0 | 0 |   |   |
| O=C1Oc2c(ccc3ccc4cccc1c4c23)N(=O)=(          |   |   | 1 |   |
| OCCOC(=O)c1ccccc1O                           |   |   |   | 0 |
| C[C@@H](CN(C[C@H](C)OC(=O)C)N=O              |   |   | 1 |   |
| Cc1ccc(CCC2CO2)cc1                           |   |   | 1 |   |
| CC[C@@H](C)ON=O                              |   |   | 1 |   |
| O[C@@H](C                                    | 0 | 0 |   | 0 |
| Cc1ccncc1                                    |   |   | 0 | 0 |
| CC(C)(C)c1cc                                 | 1 |   |   |   |

|                                             |   |   |   |
|---------------------------------------------|---|---|---|
| C[C@]12CC[C@H]3[C@@H](CCc4cc(O)ccc34)[C@@H] |   |   | 1 |
| NC(=S)Nc1cccc2ccccc12                       | 1 |   | 0 |
| N\C(=N/O)\c1ccc(O)c(O)c1                    | 1 |   |   |
| CC1C(=O)OC2C(O)C34C5C(                      | 0 |   |   |
| CCC[N+]1(C)CCCC1                            |   |   | 0 |
| C\C=C/1\CC(=C)[C@@](C)                      | 0 |   |   |
| [O-]c1nc2cc(C#N)c(cc2nc1                    | 0 |   |   |
| [O-][N+](=O)C(Br)(Br)Br                     |   | 1 |   |
| CCOP(=O)(OCC)[C@@H](C)NC(=O)N(CC            | 1 |   |   |
| Cc1ccc(NC2OC[C@@H](O)[C@H](O)[C@            | 1 |   |   |
| OC(=Nc1ccccc1Br)c2csc(c2)N(=O)=O            | 1 |   |   |
| CCN(C)C(=O)                                 | 0 | 0 | 0 |
| Cc1ncc(COP(                                 | 0 | 0 | 0 |
| CCOCCOCCOC(=O)C=C                           |   |   | 0 |
| COCC(=O)Nc                                  | 1 | 0 | 0 |
| OC(=O)\C(=C(/CCI)\C(=O)O)\Cl                |   | 0 |   |
| CCOc1ccc(cc                                 | 0 | 0 | 1 |
| CC1(C)CCC(Cc2ccc(Cl)cc2)C1(O)Cn3cncn3       |   |   | 1 |
| Nc1ncnc(Nc2ccc(Cl)cc2)n1                    |   |   | 0 |
| Clc1ccc(CC(=                                | 0 |   |   |
| CCCCCCCCCCCCCCCCCNC(=O)OC1CCN(CC1)C(=O)OC(  |   |   | 0 |
| COc1cc2ccnc3C(=O)c4ccccc4c(c1OC)c23         | 1 |   |   |
| CC(=O)OC1C(CC(=O)\C=C\                      | 1 |   |   |
| [O-]C(=O)c1c                                | 1 | 1 |   |
| Oc1cc2CC[C@H]3NCc4ccc                       | 0 |   |   |
| CC(C)[C@H](                                 | 0 | 0 |   |
| CCOC(=O)Nc1cccc2c3c[nH]ccc3nc12             |   | 0 |   |
| CC1=C(COC(=O)C2N3C(SC2(C)C)C(NC(=C          |   | 0 |   |
| C[C@@H]1Cl                                  | 0 | 0 |   |
| CCCCN(CC(O)C1=CC(=[N+]=[N-])C(=O)C          | 1 |   |   |
| Nc1nc2cc(Cl)ccc2[nH]1                       |   | 0 |   |
| CCc1nnc(N[S+](=O)([O-])c                    | 0 |   |   |
| CCC(C1CCC(C                                 | 0 | 0 |   |
| NC(=S)N                                     |   | 0 | 0 |
| Nc1ccc(\C=C/c2ccc(N)cc2S(=O)(=O)O)c         |   | 0 |   |
| OCCO                                        |   | 0 | 0 |
| COC1=C(OC)C(=O)C(=CC1=O)C                   |   | 0 |   |
| [O-]C(=O)[O-]                               |   |   | 0 |
| CON(C)C(=O)Nc1ccc(Cl)c(Cl)c1                | 1 |   | 1 |
| Fc1ccc(C=O)cc1                              |   |   | 0 |
| CCSC(=O)N(CC)CC                             |   |   | 0 |
| CCCC[P+](CCCC)(CCCC)Cc1c                    | 0 |   |   |
| Clc1ccc2cc3ccccc3cc2c1                      |   | 1 |   |

|                                                |   |   |
|------------------------------------------------|---|---|
| CC(C)CN=C(O)C=Cc1oc(cc1)N(=O)=O                | 1 |   |
| CCCN(CCC)C(=O)SCC                              | 0 | 0 |
| CC(=O)[C@H] 0                                  |   |   |
| COC(=O)CN1CN(c2ccccc2) 0                       |   |   |
| N1[C@@H]2[C@H]1c3cccc4cccc2c34                 | 1 |   |
| CCSc1ccc2Sc3ccccc3N(CCC 0                      |   |   |
| [O-][S+](c1ccccc1)c2ccc3n 0                    |   |   |
| COc1cc(O)c2C(=O)c3c(O)ccc(O)c3Oc2c1            | 1 |   |
| Oc1noc2CNC 0 0                                 |   |   |
| OC1C(O)c2ccc(c3ccc4cccc1c4c23)N(=O)            | 1 |   |
| CC(=O)c1sc(C)nc1C                              |   | 0 |
| C[C@@H](Oc1ccc(CNC(=O)c2cccnc2Oc3ccc4OCOc4c3   |   | 0 |
| CC1(C)[C@H](\C=C(/Cl)\C(F)(F)F)[C@@H]1C(=O)O[C |   | 1 |
| Oc1ccccc1Cl                                    | 0 | 0 |
| COc1nsc2ccc(N)cc12                             | 1 |   |
| CC(=O)OC1Cc2c(C)ccc3cc4c(ccc5ccccc45           | 1 |   |
| CCOC(=O)CC(SP(=O)(OC)SC)C(=O)OCC               | 0 |   |
| CCC(=O)C                                       | 0 | 0 |
| CCCCn1cc2C[C@@H]3[C@H](C=C(C)CN                | 1 |   |
| Nc1ccc(cc1)c2ccc(N)cc2N(=O)=O                  | 1 |   |
| Cc1ccc2c(C)c3ccc4ccccc4c3nc2c1                 | 1 |   |
| Clc1cccc(Cl)c1Cl                               | 0 | 0 |
| CNc1ccc(Nc2c3ccccc3nc4ccccc24)cc1              | 1 |   |
| CCC(C)N=C(O)C=Cc1oc(cc1)N(=O)=O                | 1 |   |
| Oc1cccc2c1ccc3c4ccccc4ccc23                    | 1 |   |
| Cc1ccc(cc1)c2nc([nH]c2c3ccc(C)cc3)c4cc         | 1 |   |
| [O-][N+](=O)c1cccc2nc3c(cccc3nc12)[N           | 0 |   |
| Oc1ccc(CCC(=O)c2c(O)cc(C 0                     | 0 | 1 |
| CC\C=C/C(=N\O)/C(=O)N\C(C)N(=O)=O              |   | 0 |
| COc1cc(Oc2ccc(Cl)cc2Cl)cc(c1)N(=O)=O           | 0 |   |
| [O-][N+](=O)c1ccc(\C=N\c2snc3c(Cl)cc(          | 1 |   |
| COc1ccc(CN(C)N=O)cc1                           | 0 |   |
| Clc1cc(Cl)c(OCC#Cl)cc1Cl 0                     |   |   |
| CN(C)c1ccc(cc1)N=Nc2cccc(CCl)c2                | 1 |   |
| CC12OOC1(C)c3ccc4ccnnc4c3O2                    | 0 |   |
| BrCc1ccc(CBr)cc1                               | 0 |   |
| C[C@]12CC(C 0                                  |   |   |
| CC1=Nc2ccccc2C1(C)C                            | 0 | 0 |
| OCc1oc(C=O)cc1                                 | 1 | 0 |
| CC(=O)SC[C@ 0 0                                |   | 0 |
| CCC1C(=C(C)c2cc(O)ccc12)c3ccc(O)cc3            | 0 |   |
| C(Nc1ncnc2c1ncn2C3CCCCO3)c4ccccc4              |   | 0 |
| CCN1C[C@]2 0                                   |   |   |

|                                               |   |   |   |   |
|-----------------------------------------------|---|---|---|---|
| Cc1cc(C)c(C)c(O)c1                            |   |   |   | 1 |
| Oc1ccc2ccc3ccc(c4c5ccccc5c1c2c34)[N+          |   |   | 1 |   |
| NCCCC(N)CC(                                   | 0 | 0 |   |   |
| C[C@]12CC[(                                   | 0 | 0 |   |   |
| CC(=O)c1ccc(OCC(=O)N2CCCC2)cc1                |   |   |   | 0 |
| [O-][N+](=O)c1ccc(cc1)[N+]#N                  |   |   | 1 |   |
| Cc1cccc(C)c1Nc2ncccc2C(=O)O                   |   |   |   | 1 |
| Cc1[nH]cnc1CN2CCc3c(C2=                       |   | 0 |   | 0 |
| CCOCCn1c(nc                                   | 1 | 0 |   | 0 |
| Cc1cc2ccccc2c3cc4C=CC(O)C(O)c4cc13            |   |   | 1 |   |
| Oc1ccc(\C=C/C#N)\C(=O)                        |   | 0 |   |   |
| COS(=O)(=O)C(F)(F)F                           |   |   | 1 |   |
| O=C(OOC(=C                                    | 0 | 0 | 0 | 0 |
| FC(F)(F)C(F)(F)Cl                             |   |   | 0 |   |
| Cc1ccc(Cl)c(O)c1                              |   | 0 |   | 0 |
| CCC(=O)c1ccc(Cl)cc1                           |   |   |   | 0 |
| C[C@]12CC[(                                   | 0 | 0 |   |   |
| CCC12OC1O2                                    |   |   | 1 |   |
| Oc1cc(Cl)cc(Cl)c1                             |   |   | 0 | 1 |
| CC1(CCCCC1)C(=O)Nc2ccc(O)c(Cl)c2Cl            |   |   |   | 1 |
| CCCCN(CC(CO)OCc1ccccc1)N=O                    |   |   | 1 |   |
| COc1ccc(O)cc1C(C)(C)C                         |   |   | 0 |   |
| OC\C=C/1\C[N@+ ]2(CC=C)CC[C@ @]34[C@ @H]2C[C( |   |   |   | 0 |
| Nc1nc(N)c(s:                                  | 0 | 0 |   | 0 |
| N[C@ @H]([C                                   | 0 | 0 |   |   |
| CCCC(CC)CON(=O)=O                             |   |   |   | 0 |
| CC(O)c1cc2ccc3cccc4ccc(c1)c2c34               |   |   | 1 |   |
| Cc1c(ccc2ccccc12)N(=O)=O                      |   |   | 1 |   |
| COc1ncnc(N                                    | 0 |   |   | 0 |
| COc1cc(c(O)c(c1)C(C)(C)C(C)(C)C               |   |   |   | 1 |
| COc1c(O)c2OC3OC=CC3c2c4OC(=O)C5=              |   |   | 1 |   |
| COc1cc2N3[C@H]4[C@ @H]5[C@ @H](C              |   |   | 0 |   |
| CC(C)(Br)C(=O)NCc1ccccc1                      |   |   | 0 |   |
| Clc1ccc(Br)cc1                                |   |   | 0 |   |
| CCCCC\C=C/C=C\C=O                             |   |   | 0 |   |
| C[C@ @H]([C@H](O)c1ccccc1)N(C)C               |   |   |   | 0 |
| Cc1cc(O)ccc1O                                 |   |   |   | 0 |
| CC(C)C(=O)N(O)c1ccc(Cl)cc1                    |   |   | 1 |   |
| Clc1ccc2ncccc2c1                              |   |   | 1 |   |
| CN1CCN(CC1                                    | 0 | 0 | 1 |   |
| COC1=C(N2[C@H](SC1)[C@H](NC(=O)[C@H](N)C3=C   |   |   |   | 0 |
| C1CN(CCN1)c                                   | 0 | 0 |   | 0 |
| COc1cccc(n1                                   | 1 | 0 |   |   |

|                                         |   |   |   |
|-----------------------------------------|---|---|---|
| CC(=O)N1CCC[C@H]1C(=O)N(CC(=O)O)I       | 1 |   |   |
| SCc1ccccc1                              | 0 |   |   |
| Fc1ccc(cc1)C                            | 1 | 1 | 0 |
| NC(=N)NN=C(\C=C/c1oc(cc1)[N+](=O)[O-])  | 1 |   |   |
| CCCCOCNC(=O)C=C                         |   |   | 0 |
| [O-][N+](=O)                            | 0 | 0 | 1 |
| CCOP(OCC)OCC                            |   |   | 0 |
| CC1(Cn2ccnn                             | 0 |   |   |
| OP(=O)(O)c1ccccc1                       |   |   | 0 |
| CC(=O)OC(OC(=O)C)c1oc(cc1)N(=O)=O       | 1 |   |   |
| CCCC[C@@H](CC)COC[C@H]1CO1              | 1 |   |   |
| CCC(Cc1c(l)cc(l)c(N)c1l)C(=O)O          |   |   | 0 |
| C\C=C/c1ccc                             | 0 | 0 |   |
| CCCCOC(=O)C                             |   |   | 0 |
| OCC(O)COc1cccc2ccccc12                  |   | 0 |   |
| N1C2C1c3cc4ccccc4c5ccc6cccc2c6c35       | 1 |   |   |
| CCOP(=O)(Oc1ccc(cc1)[N+](=O)[O-])c2c    | 1 |   |   |
| OS(=O)(=O)Oc1ccc2ccc3c4ccccc4cc5ccc     | 0 |   |   |
| NC(=S)C(=S)N                            |   |   | 0 |
| NC(=O)c1cccc(c1)[N+](=O)[O-]            | 1 |   |   |
| CCC\C=C\C(=O)OC1C(C)(C)CC2C1(O)C=C      | 1 |   |   |
| CC(S)C(C)S                              |   |   | 0 |
| O=C1c2ccc3c4nc5ccccc5n4C(=O)c6ccc(c     | 1 |   |   |
| CCOC(=O)c1[nH]c2ccccc2c1\N=C\c3ccc(     | 1 |   |   |
| CCOCC(O)CO                              | 0 | 0 | 0 |
| Oc1ccc(NC(=                             | 0 | 0 | 1 |
| O[C@H](CBr                              | 0 | 0 | 0 |
| C[C@H]1C[C@@H](O)CC(C)(C)C1             |   |   | 0 |
| NC1=N[C@@H](CS1)C(=O)O                  | 0 |   |   |
| CC(c1ccc(O)cc1)(c2ccc(O)cc2)c3ccc(O)cc3 |   |   | 1 |
| NC(=C(C#N)C                             | 0 | 0 |   |
| CC(C)NC[C@@H]1CCc2cc(CO)c(cc2N1)[       | 1 |   |   |
| CC(C)CC(=O)OC(C)(CCC=C(C)C)C=C          |   |   | 0 |
| CC(=O)c1cc(N)ccc1OCC(O)CNC(C)(C)C       | 0 |   |   |
| CCCCCOC(=O)C                            |   |   | 0 |
| CC(C)NC(=O)\C=C/c1oc(cc1)[N+](=O)[O     | 1 |   |   |
| CN(C)c1ccccc1                           |   |   | 0 |
| Cc1ccc2ccc3cc4ccccc4c5ccc1c2c35         | 1 |   |   |
| ClCCNC(=O)N                             | 0 | 0 | 1 |
| Oc1ccc2cc(cc(c2c1)S(=O)(=O)O)S(=O)(=    | 0 |   |   |
| Nc1ccc(Cc2ccc(N)cc2)cc1                 |   |   | 0 |
| CCN1C(=O)N                              | 0 | 0 |   |
| ClC(=O)c1cccc(c1)C(=O)Cl                |   |   | 0 |

|                                               |   |   |   |
|-----------------------------------------------|---|---|---|
| Fc1ccccc1C2=N[C@@H](NC(=O)c3cc4ccccc4[nH]3)C( |   |   | 1 |
| CCC1OC(CO)C(COCC2OC(COC3OC(CO)C(              | 0 |   |   |
| C[C@@H](C1=C(CCN(C)C)C(                       | 1 |   | 0 |
| ClC1=C(Cl)C(=O)OC1                            |   | 1 |   |
| C[C@@H]1C                                     | 0 |   |   |
| [C-]#N                                        | 0 | 0 | 0 |
| CN(CCCC(O)c1ccnc1)N=O                         |   | 1 |   |
| CCCc1c(O)c(ccc1OCCCCc2r                       | 0 |   | 1 |
| CC12OOC1(COC(=O)Nc3ccc(Cl)cc3)Oc4c            |   | 1 |   |
| CC1(C)C(C(=O)OC(C#N)c2cccc(Oc3ccccc           |   | 0 |   |
| CC1CS1                                        |   | 0 |   |
| COc1cccc2C(=O)c3c(O)c4CC(O)(CC(O)c4           |   | 1 |   |
| CC1=C(C)C(=O)C(=C(C)C1=                       | 0 |   |   |
| C=CN=Nc1ccccc1                                |   | 1 |   |
| CC(C)Nc1nc(N)nc(Cl)n1                         | 0 |   | 0 |
| CO[C@@H]1C[C@H](C[C@@H](C)[C@@H]2CC(=O)[C     |   |   | 0 |
| CCC(=O)N(C1CCN(CC1)C(C)Cc2cccs2)c3ccccc3      |   |   | 0 |
| O=C1CN(CCN2CC(=O)N(CN3CCOCC3)C(=              | 1 |   |   |
| CCC1OC(=O)C(C)C(OC2CC(C)(OC)C(O)C(            | 0 |   |   |
| OC[C@H]1N(                                    | 0 | 0 |   |
| C1=Cc2c3cc4ccccc4cc3cc5ccccc1c25              |   | 1 |   |
| COc1ccc(cc1)C2=COc3cc(C                       | 0 |   | 1 |
| C1CCC(CC1)N2C3C2c4ccccc4c5ccccc35             |   | 1 |   |
| OC(=O)CCC=C                                   |   |   | 0 |
| ClCc1ccnc1                                    |   | 1 | 0 |
| O=N(=O)c1ccc(Oc2ccccc2)cc1                    |   | 1 |   |
| CCCCCCCCCCCCCO                                |   |   | 0 |
| O=N(=O)c1ccc2CCc3cccc1c23                     |   | 1 | 1 |
| Nc1c(Cl)c(Cl)nc(C(=O)O)c1Cl                   | 0 |   | 0 |
| CCOC(=O)CC(=O)c1ccccc1                        |   |   | 0 |
| COc1ccc(cc1O)[C@@H]2CC(=O)c3c(O)cc(O[C@@H]4   |   |   | 0 |
| OC(=O)CCCCCBr                                 |   | 1 |   |
| OC(CNCCCC                                     | 0 | 0 |   |
| OC(=O)c1cc(Cl)cc(Cl)c1                        |   | 0 | 0 |
| O=N(=O)c1ccc(c2ccccc2)c(c1)N(=O)=O            |   | 1 |   |
| OCCNCc1oc(cc1)[N+](=O)[O-]                    |   | 1 |   |
| COc1ccc(CNC                                   | 1 | 0 |   |
| Cc1ncc([N+](                                  | 0 | 0 | 1 |
| Oc1ccc2ccccc2c1N=Nc3ccc(cc3Cl)[N+](=          |   | 1 |   |
| CCCN(CCC(C)O)N=O                              |   | 1 |   |
| CC(=O)CC(=O)Nc1ccccc1                         |   | 0 | 0 |
| Cc1c2C3OC3c4ccccc4c2cc5ccccc15                |   | 1 |   |
| [O-][N+](=O)c1ccccc1\C=C\C(=O)c2cccc          |   | 0 |   |



|                                               |   |   |   |
|-----------------------------------------------|---|---|---|
| O=C(\C=C\c1ccc(OCC2ccccc                      | 0 |   |   |
| Clc1ccc(cc1)c2nc3scn3c2N=O                    |   | 1 |   |
| OC(=O)c1cc(O)c2C(=O)c3c                       | 0 | 1 | 1 |
| C1COCCOCCOCCOCCO1                             |   | 0 |   |
| CCC(CCCC(=O)O)COC(=O)c1ccccc1C(=O)            |   | 0 |   |
| C[N+](C)C2(                                   | 0 | 0 |   |
| Cc1cc(nnc1NCCN2CCOCC2                         |   | 0 | 0 |
| [O-][N+](=O)c1oc(cc1)c2csc(NC(=O)C(F          |   | 1 |   |
| OCC=Cc1ccccc1                                 |   |   | 0 |
| COc1cc(ccc1O)C2Oc3cc(ccc3OC2CO)C4C            |   | 0 |   |
| Oc1c2nc3ccccc3c2nnn1\N=C\c4ccc(cc4)           |   | 1 |   |
| C[C@H]1CS(:                                   | 0 |   |   |
| CCN(CC)CCNc1ccc(CO)c2S(                       | 0 | 1 |   |
| COCCOC                                        |   | 1 | 0 |
| CC(C)(C)C(=O                                  | 0 |   | 0 |
| CCOC(=O)c1c                                   | 0 | 0 | 0 |
| N(c1ccccc1)c2ccc3ccccc3c2                     |   | 0 |   |
| CC1C2CCC(=C3C(C2OC1=O                         |   | 0 |   |
| CCCCCCC(C)(C)C(=O)OCC1CO1                     |   | 1 |   |
| COc1cc(OC)c                                   | 0 | 0 |   |
| Oc1ccc(cc1)C2(O[S+](=O)(                      |   | 0 |   |
| C[C@]12CC[(                                   | 0 | 0 | 1 |
| CCCCCCCCCCCCCCCC(CO)\N=C(\O)/CCCCCCCCCCCCCCCC |   |   | 0 |
| COc1ccc2[nH]cc(CC(N)C(=                       |   | 0 |   |
| CC12CC(=O)C3C(CCC4=CC(=O)C=CC34C)(            |   | 1 |   |
| COc1c(N2C[C@@H]3CCCN[C@@H]3C2)c(F)cc4C(=O)    |   |   | 0 |
| Nc1cc(ccc1CO)N(=O)=O                          |   | 1 |   |
| CC(C(=O)O)c:                                  | 0 | 0 | 0 |
| CC(O)Cn1cnc2N(C)C(=O)N(C)C(=O)c12             |   |   | 0 |
| COc1ccc2[nH]cc(CCN(C(C)C)C(C)C)c2c1           |   |   | 0 |
| Oc1ccc(CC=C)cc1                               |   | 0 |   |
| Cn1c(N)nc2nc3ncccc3cc12                       |   | 0 |   |
| CC(C)C(O)CCC(C)C1CCC2\C=C\C=C\C3/CC           |   | 0 |   |
| CN1C(=O)CN=C(c2ccccc2F)c3cc(ccc13)[I          |   | 1 |   |
| O=C(Cn1ccnc1N(=O)=O)NCc2ccccc2                |   |   | 0 |
| C[S+](([O-])c1ccc(cc1)c2nc                    |   | 1 |   |
| CC1(C)C=C(C(=O)O)C(C)(C)N1O                   |   | 0 |   |
| COc1ccc(cc1)C2=COc3cc(C                       |   | 0 |   |
| CCc1ccnc2ccccc12                              |   | 0 |   |
| COC(=O)CCCCCCCC(=O)OC                         |   |   | 0 |
| [O-][N+](=O)c1ccc2ccc3ccc(c4ccc1c2c3          |   | 1 |   |
| Cc1cc(C)c(c(C)c1)[S+](=O)                     |   | 1 |   |
| CCCCC(=O)OCC\C=C/CC                           |   |   | 0 |

|                                              |   |   |  |   |
|----------------------------------------------|---|---|--|---|
| OC(=O)Cc1ccccc1Oc2ccc(Cl)cc2Cl               |   |   |  | 0 |
| Cc1cc(c(C)c2c3cc(ccc3[nH]c12)[N+](=O)        | 1 |   |  |   |
| CCCOc1ccc2r                                  | 0 | 0 |  | 1 |
| Clc1ccc(Oc2ccc(cc2)N(=O)=O)c(Cl)c1           | 1 |   |  | 1 |
| Cc1c[nH]c2cc                                 | 0 | 0 |  | 0 |
| OC(=O)CCC(=O)Nc1cc(Cl)c(Cl)c(Cl)c1           | 0 |   |  |   |
| Cn1nnnc1SCC2=C(N3[C@H](SC2)[C@H](NC(=O)[C@H] |   |   |  | 0 |
| [O-]S(=O)(=C                                 | 0 | 0 |  |   |
| CC(C)(Oc1ccc(cc1)[C@H]2CCCC3ccccc23          | 0 |   |  |   |
| [O-]C(=O)c1ccccc1Nc2cc(Cl)ccc2C(=O)[O-]      |   |   |  | 0 |
| CC(C)(C)C(=O)OCOC(=O)[C@@H]1N2[C@H](SC1(C)C) |   |   |  | 0 |
| OC(=O)C1CSC(N1C(=O)CCS)c2ccccc2O             | 0 |   |  |   |
| COc1cc2c(oc3ccccc23)cc1N                     |   |   |  | 1 |
| OC(=O)c1cc(l)cc2cccnc12                      | 0 |   |  |   |
| COc1cc(CC=C)ccc1OC(=O)Cc2ccccc2              |   |   |  | 0 |
| CC1=C(C=O)C(C)(C)CCC1                        |   |   |  | 0 |
| CC(=O)Nc1ccc(cc1)N=Nc2cc(C)ccc2O             | 1 |   |  |   |
| CC1=C(NNC(:                                  | 0 | 0 |  |   |
| NCC(O)c1ccc(O)c(O)c1                         |   |   |  | 0 |
| CCC1=C(OC)C(=O)c2c(O)c(OC)c(OC)c(O)          | 0 |   |  |   |
| C\C=C/C=C/                                   | 0 | 0 |  |   |
| CN(C)c1ccc(cc1)C2CC3(C)C(CCC3(O)CCC(         |   |   |  | 0 |
| CCC(=C)C=O                                   |   |   |  | 1 |
| OCC1OC(CC1O)N2C=C(COO)C(=O)NC2=(             | 1 |   |  |   |
| C[C@@H](O)c1ccc2ccc3ccccc4ccc1c2c34          | 1 |   |  |   |
| O[C@@H]1CCNC1CC(=O)                          | 0 |   |  |   |
| ONC(=O)CCC                                   | 0 | 0 |  | 0 |
| Oc1cccc2c1ccc3c4C=Cc5cccc(cc23)c45           | 1 |   |  |   |
| CC1(C)S[C@@H]2[C@H](\N=C\N3CCCCC3)C(=O)N2[   |   |   |  | 0 |
| Cn1c(C(=O)Nc2cccn2)c(O                       |   | 1 |  |   |
| CCOP(=S)(CC)Sc1ccccc1                        | 0 |   |  | 0 |
| Oc1ccc(O)c(c                                 | 0 |   |  | 0 |
| FC(F)(F)[C@]1(OC(=O)Nc2ccc(Cl)cc12)C#CC3CC3  |   |   |  | 1 |
| CC(=CCC\C(=C\C\C\C(=C\COC(=O)\C)\C)C         |   |   |  | 0 |
| OC(=O)c1cc(,                                 | 0 | 0 |  |   |
| CC=C1CC(C)C(O)(CO)C(=O)OCC2=CCN3(:           | 0 |   |  |   |
| C=CC(=O)NCNC(=O)C=C                          | 1 |   |  | 0 |
| COP(=S)(OC)Oc1ccc(cc1)[S                     |   | 0 |  |   |
| CC(=O)Nc1cc                                  | 0 | 0 |  |   |
| CC\C=C\C=C\C=C\C=C\C=C\C=C\C=OCC(O)CO        | 1 |   |  |   |
| Cc1ccc2ccccc2c1                              | 0 |   |  | 0 |
| CC(=O)OC(=O)C                                | 0 |   |  | 0 |
| OC(=O)c1cc2                                  | 0 | 0 |  |   |

|                                                |   |   |   |   |
|------------------------------------------------|---|---|---|---|
| CCCC1c2OC(=CC(=O)c2cc3C(=O)C=C(N(CC)c13)C(=O)C |   |   |   | 0 |
| Clc1c(Cl)c(Cl)c2ccccc2c1Cl                     |   |   | 0 |   |
| Sc1nnc(S)s1                                    |   |   |   | 0 |
| Oc1ncnc2ccccc12                                |   |   | 0 |   |
| CCCCCCCCOc                                     | 0 | 0 |   | 0 |
| CC(=CCCC(=CC=O)C)C                             |   |   |   | 0 |
| C1CC2=CC3OC3C=C(C1)O2                          |   |   | 0 |   |
| CCC(C)C(N)C(                                   | 0 | 0 |   | 0 |
| CC(C)OC(=O)CCC(=O)OC(C)C                       |   |   |   | 0 |
| COCCOCCOC                                      |   |   | 0 | 0 |
| N[C@@H](C                                      | 0 | 0 |   | 0 |
| CSC(=N)N                                       | 0 | 0 |   |   |
| COc1ccnc(C[S+])([O-])c2nc                      |   |   | 0 |   |
| BrC1ccc(Oc2cc(Br)c(Br)cc2Br)c(Br)c1            |   |   | 0 | 1 |
| Clc1ccc(C=Cc2ccc(cc2)N(=O)=O)cc1               |   |   | 1 |   |
| CCOC(=O)CC(C(=O)C)C(=O)C                       |   |   |   | 0 |
| Oc1ccc2C(=O)c3cc(O)ccc3C(=O)c2c1               |   |   | 0 |   |
| Fc1ccc(cc1Cl)N(=O)=O                           |   |   |   | 0 |
| CCCCCCCCCCCC(=O)O                              |   |   |   | 0 |
| O=C(Oc1ccccc1)c2ccccc2                         |   |   |   | 0 |
| N\C(=N/O)\c1cc(O)c(O)c(O)c1                    |   |   | 1 |   |
| Cc1ccc(cc1N)C(=O)O                             |   |   | 1 |   |
| Clc1cccc2cc3ccccc3cc12                         |   |   | 0 |   |
| C=CC(=O)OC[C@H]1CO1                            |   |   | 1 |   |
| CCC(=O)c1c2ccccc(O)c2c(O)c3c(O)cccc13          |   |   | 1 |   |
| COc1ccc2[nH                                    |   | 0 |   |   |
| OCC1OC(OC2(CO)OC(CO)C(O)C2O)C(O)C              |   |   | 0 |   |
| Oc1ccnc(S)n:                                   | 0 | 0 |   |   |
| CC(=O)OCN(CCCCCI)N=O                           |   |   | 1 |   |
| Cc1cc2CCc2c3ccc4C(O)C(O)C=Cc4c13               |   |   | 1 |   |
| NC1=NC(=O)                                     | 0 | 0 | 1 | 0 |
| ClC(C(=O)Cl)c1ccccc1                           |   |   | 1 |   |
| OCC(=C(Br)CO)Br                                |   |   | 1 |   |
| CN1CCN(CC1                                     | 1 | 1 | 0 |   |
| CCOC(=O)N                                      | 0 | 0 | 1 | 0 |
| CNC1=C(Cl)C(=O)N(N=C1)c2ccccc2)C(F)(F)F        |   |   |   | 0 |
| CCCN1C(=O)N(CCC)c2nc([r                        |   | 0 |   |   |
| CNCCO                                          |   |   | 0 | 0 |
| C[C@@H](Cl)CCl                                 |   |   | 1 |   |
| SCCCCCCCC                                      |   |   |   | 0 |
| CC1C(OC(=O)C)C2OC2C3=CC(=O)C4(CC1              |   |   | 1 |   |
| CCCCCCCCBr                                     |   |   | 0 | 0 |
| COC(=O)c1cc2c3ccccc3[nH]c2c(n1)c4ccc           |   |   | 1 |   |

|                                             |   |   |   |   |
|---------------------------------------------|---|---|---|---|
| Cc1ccccc1c2ccc(N)c(C)c2                     | 1 |   |   |   |
| Cc1ccc2nc(sc2c1)c3ccc(N)cc3                 | 1 |   |   |   |
| CC(=O)Nc1ccc(Oc2ccccc2)cc1                  | 1 |   |   |   |
| OC(=O)c1cc(O)c2C(=O)c3c(O)cc(O)cc3C         | 0 |   |   |   |
| COC(=O)C1=C(C)NC(=C(C1                      | 0 |   |   |   |
| O=C1OC(=O)c2cc3C(=O)OC(=O)c3cc12            |   |   |   | 0 |
| COc1cc(ccc1N=Nc2cc(c3ccccc3c2O)S(=C         | 1 |   |   |   |
| Cc1cccc(c1C)N(=O)=O                         |   |   |   | 0 |
| Oc1c(Cl)cc(Cl)cc1[S+][[O-]                  | 0 |   |   |   |
| CCCOc1ccc(cc1N)C(=O)OCCN(CC)CC              |   |   |   | 0 |
| C[C@@H]1C[C@H]2C3C[C@H](F)C4=CC(=O)C=CC4(C) | 1 |   |   |   |
| CC1=CC2OC3C(O)CC(C)(C34CO4)C2(CO)(          | 0 |   |   |   |
| Cc1ccccc1                                   | 0 | 0 | 0 | 0 |
| Cc1cc(O)c2C(=C3C(=O)C4C(O)C5C6C(O)(         | 0 |   |   |   |
| C\C1=C\CCC(=C)[C@@H]2CC(C)(C)[C@            | 0 |   |   |   |
| CCCC(C)(COC                                 | 0 | 0 | 0 | 0 |
| CCOC(=O)c1ccccc1                            |   |   |   | 0 |
| NC(=N)NCCN                                  | 0 |   |   |   |
| CCCCCCCCOC(=O)C                             |   |   |   | 0 |
| C\C=C/1\CC(C)C(O)(CO)C(=O)OCC2=CCN          | 1 |   |   |   |
| CC(C)(C)NC(=O)N                             |   |   |   | 0 |
| CCCC[P+](CC)(CCCC)CCCC                      |   |   |   | 0 |
| C[C@H]1C[C                                  | 0 | 0 |   | 0 |
| OCCN1CCN(CCCN2c3ccccc:                      | 1 |   |   |   |
| CC(C)(C)C(=O)c1ccccc1                       |   |   |   | 0 |
| COc1c2C=CC(=O)Oc2cc3oc                      | 0 | 1 |   | 0 |
| [O-][N+](=O)c1ccc2N(S\C(=N/C(=O)CCC         | 1 |   |   |   |
| CCC1CN2CCc3cc(OC)c(OC)cc3C2CC1CC4I          | 0 |   |   |   |
| CO[C@@]1(NC(=O)CSC(F)F)[C@@H]2OCC(=C(N2C1=  |   |   |   | 0 |
| C[N+](C)(CCOc1ccccc1)Cc2cccs2               |   |   |   | 0 |
| CC(C)COC(=O)\C=C\c1oc(cc1)[N+](=O)[(        | 1 |   |   |   |
| CC[C@H]1OC(=O)C[C@@H](O)[C@H](C)[C@@H](O[   |   |   |   | 0 |
| NC(C1CC1)(C(=O)O)c2ccc(                     | 0 |   |   |   |
| C\N=C\1/SN                                  | 1 | 0 |   |   |
| CC(C)COC(=O)C(C)C                           |   |   |   | 0 |
| OC(=O)COc1ccc2ccccc2c1                      | 0 |   |   | 0 |
| OC(C(COC(=O)CCC(=O)O)NC(=O)C(Cl)Cl)         | 0 |   |   |   |
| CNC(=O)N(C)c1nnc(s1)C(C)(C)C                |   |   |   | 0 |
| Cc1ccc(cc1N=O)[N+](=O)[O-]                  | 1 |   |   |   |
| Nc1nc(nc2c1ncn2C3OC(CO)C(O)C3O)c4(          | 1 |   |   |   |
| OCCNCc1ccccc1                               |   |   |   | 0 |
| CC(C)C1CCC(C)CC1                            | 0 |   |   |   |
| CCN(CC)CCOC[C@H]1O[C@@H](O)[C@H](OCCN(CC)   |   |   |   | 0 |

|                                             |   |   |   |   |
|---------------------------------------------|---|---|---|---|
| OC(=O)C1Cc2c([nH]c3ccccc23)C(Cc4cccc        | 0 |   |   |   |
| [O-]c1ccccc1                                |   |   | 0 |   |
| c1ccc2c(c1)ccc3cc4c(ccc5ccccc45)cc23        | 1 |   | 0 |   |
| CC1CCc2c(N3                                 | 0 | 0 | 0 |   |
| CC12OOC1(C)c3c(O2)ccc4ccccc34               | 0 |   |   |   |
| Clc1ccc2OC(=                                | 0 | 0 |   |   |
| [O-][N+](=O)c1ccccc1SS\C=C(/Cl)\C(F)        | 1 |   |   |   |
| C\C=C\C=C\C(=O)[O-]                         |   |   | 0 |   |
| OC(=O)C(Cc1c[nH]c2ccccc12)NC(=O)CO          | 0 |   |   |   |
| C\C=C\1/NC(=O)[C@H]2CSSCCC=C[C@H](CC(=O)N[C |   |   | 0 |   |
| Cc1ccsc1C(=                                 | 0 | 0 |   |   |
| [O-][N+](=O)c1ccc2cccc3c4ccccc4c1c23        | 1 |   |   |   |
| C=Cc1cccn1                                  | 0 |   |   |   |
| CCCCOCCOC(=O)COc1cc(Cl)c(Cl)cc1Cl           |   |   | 0 |   |
| CCNC(=O)[C@H]1O[C@H]                        | 0 |   |   |   |
| CCOC(=O)C(C)Oc1cccc2C(=                     | 0 |   |   |   |
| C[C@@H]1OC(=O)C[C@H](O)C[C@H](O)CC[C@@H](   |   |   | 0 |   |
| C1CCC2OCCOCCOCCOC3CCCC3OCCOCC               | 0 |   |   |   |
| CCN(CC)c1ccc(cc1)N=Nc2cccn2                 | 0 |   |   |   |
| NC[C@@H]1                                   | 0 | 0 |   |   |
| COc1ccc2c(c1)c(CC(=O)N3                     | 0 |   |   |   |
| CCOC(=O)CC(=O)c1cc(F)c(Cl)nc1Cl             |   |   | 0 |   |
| CC(O)C[N+](C)(C)NC(=O)C(=C)C                | 0 |   |   |   |
| OC1OC(=O)C=C1CCl                            | 1 |   |   |   |
| CC(=O)O[C@H](CC(=O)[O-])C[N+](C)(C)C        |   |   | 0 |   |
| NCCOS(=O)(=O)O                              |   |   | 0 |   |
| CN(C=O)N=O                                  | 1 |   |   |   |
| CCCc1ccc(O)c(OC)c1                          |   |   | 0 |   |
| CN(C)C(=O)C                                 | 0 | 0 | 0 | 0 |
| CCCCON(OC(=O)C)C(=O)c1ccc2ccccc2c1          | 1 |   |   |   |
| CC1CCc2c1cc(C)c3c2ccc4ccccc34               | 1 |   |   |   |
| O=C1C(=O)c2c(ccc3ccc4ccccc1c4c23)N(=        | 1 |   |   |   |
| Nc1ccc2c(Cc3ccccc23)c1                      | 1 |   |   |   |
| CCCCCC(CC)C                                 | 0 |   |   |   |
| C[C@]12CC[C                                 | 0 | 1 |   | 0 |
| Cc1c2ccc3ccccc3c2nc4ccc(CO)cc14             | 1 |   |   |   |
| CN(C)CC\C=C                                 | 1 | 1 |   |   |
| CC(CCc1ccccc                                | 1 | 1 |   | 0 |
| O=C1Nc2ccccc2O1                             |   |   | 0 |   |
| CCOC(=O)CC([O-])C(=O)OCC                    |   |   | 0 |   |
| CCN(CC)S(=O)(=O)c1ccc(NC(=O)C)cc1           | 0 |   |   |   |
| Nc1ccc2ccc3ccccc3c2n1                       | 1 |   |   |   |
| Cc1c2ccccc2c(CCl)c3ccccc13                  | 1 |   |   |   |

|                                              |   |   |   |   |   |
|----------------------------------------------|---|---|---|---|---|
| Cc1ccc2[nH]c(N)nc2c1                         |   |   |   | 1 |   |
| CC(=O)O[C@                                   | 0 | 0 |   |   |   |
| COC(=O)[C@                                   | 0 | 0 |   |   | 0 |
| O=C1CCCCC1                                   |   |   | 0 |   | 0 |
| OCP(Cl)(CO)(CO)CO                            |   |   | 0 |   |   |
| COc1ccc(C[Ci                                 | 0 | 0 |   |   | 0 |
| O=Nc1cc2c3ccccc3ccc2c4ccccc14                |   |   | 1 |   |   |
| CN1CCCN(C)C1=O                               |   |   | 0 |   |   |
| CCCCc1oc2cc                                  | 1 | 1 |   |   | 1 |
| OC1=C(O)C23CCCC2(O3)c4cc5ccc6cccc            |   |   | 0 |   |   |
| ONc1ccc2c(Cc3ccccc23)c1                      |   |   | 1 |   |   |
| Oc1ccc2C3C4OC4C(=O)c5c(O)ccc(C6C7C           |   |   | 1 |   |   |
| OC(=O)CSc1ccc2c3ccccc3C(=O)c4cccc1c          |   |   | 1 |   |   |
| COc1ccc2oc(cc2c1N(CCCl)CCl)[N+](=O)          |   |   | 1 |   |   |
| COc1cc2CCN3C(=O)N(C)\C                       |   | 0 |   |   |   |
| CC(=C(CCOC(=O)c1ccccc1)SC(=O)c2cccc          |   |   | 0 |   |   |
| CC1(CO)CN(NC1=O)c2ccccc2                     |   |   |   |   | 0 |
| CC(C)CCC(=O)C                                |   |   |   |   | 0 |
| CCCCCOC(=O                                   | 0 | 0 |   |   |   |
| O=C1c2ccccc2Oc3ccccc13                       |   |   |   |   | 0 |
| O=C1NC(=O)C2=C(N1)[N-]C(=O)N2                |   |   |   |   | 0 |
| OC1c2ccccc2c3ccc(cc13)[N+](=O)[O-]           |   |   | 1 |   |   |
| CO[C@ @H]1COCC[C@ @H]1[NH2+][C@ @H]2CC[C@    |   |   |   |   | 0 |
| [O-][N+](=O)O[C@H]1CO[C@ @H]2[C@             |   |   | 0 |   |   |
| OC(=O)C[C@H](NC(=O)OCc1ccccc1)C(=O)O         |   |   |   |   | 0 |
| OC(=O)c1cc(O)c2cccc(O)c2n1                   |   |   | 0 |   |   |
| COc1ccc(CCN                                  | 1 | 0 |   |   | 0 |
| ClC1=C(Cl)[C@]2(Cl)[C@ @H]3[C@H]4C[C@H]([C@@ |   |   |   |   | 1 |
| CC(=CCc1ccc(O)c2C(=O)c3c(O)c4c(OC5C          |   |   | 1 |   |   |
| COC1C(CCC2(                                  | 0 | 0 |   |   |   |
| NC1=NCNc2c1ncn2C3OC(CO)C(O)C3=O              |   |   | 0 |   |   |
| [O-]S(=O)OC[C@H]1O[C@H](O[C@]2(COS(=O)[O-])C |   |   |   |   | 0 |
| CC(=O)C(N=Nc1ccc(cc1Cl)c2cccc(N=NC(C         |   |   | 0 |   |   |
| CS(=O)(=O)Nc1ccc(cc1Oc2ccccc2)N(=O)=O        |   |   |   | 1 | 1 |
| NC(=O)c1ccc                                  | 1 |   |   |   |   |
| C1C=C[C@ @H]2[C@ @H]3C[C@ @H](C=             |   |   | 0 |   |   |
| CC(=C[C@H]1[C@H](C(=O)OCN2C(=O)C             |   |   | 1 |   |   |
| ClC#N                                        |   |   | 0 |   |   |
| Oc1ccc2cc(cc(c2c1N=Nc3ccccc3)S(=O)(:         |   |   | 0 |   |   |
| OC1OC(=O)C(=C1C(Cl)Cl)Cl                     |   |   | 1 |   |   |
| COc1cc(C)cc2c(O)c(cc(O)c12)c3c(C)cc4c        |   |   | 0 |   |   |
| CCOC(=O)c1r                                  | 0 | 0 |   |   | 0 |
| CC(=CCC[C@ @](C)(O)[C@H]1CCC=CC1=            |   |   | 1 |   |   |

|                                          |   |   |   |   |
|------------------------------------------|---|---|---|---|
| CC(C)(C)c1cc(c(O)c(c1)C(C)(C)C(C)(C)C    |   |   |   | 1 |
| CC1(C)N([O])C(=[N+])([O-]                | 0 |   |   |   |
| Clc1ccccc1CN                             | 1 | 0 |   |   |
| Oc1c2ccccc2cc3ccccc13                    |   |   | 1 |   |
| C\C=C\C#N                                |   |   | 0 |   |
| CN(C(=O)C)c:                             | 0 | 0 |   |   |
| CN(C)CCN1C(=O)c2ccccc2N(C)c3ccccc13      |   |   |   | 0 |
| O=C1OC(=O)c2cc(ccc12)N(=O)=O             |   |   | 1 | 0 |
| Oc1cc(Cl)c(Cl                            | 0 | 0 | 0 | 1 |
| [O-][N+](=O)c1cccc(c1)S(=O)(=O)OCC2(     |   |   | 1 |   |
| CCC1=C(CC2NCCc3cc(OC)c(OC)cc23)CC4       |   |   | 0 |   |
| CN1N=C(S/C/1=N/C(=O)C)                   |   | 0 |   |   |
| Nc1cc(Cl)cc(c1O)S(=O)(=O)O               |   |   | 0 | 0 |
| CC(COc1ccccc1)NN                         |   |   |   | 0 |
| C\C(=C\c1ccccc1)\C=O                     |   |   | 0 |   |
| OC(=O)CCc1c[nH]c2ccccc12                 |   |   | 0 |   |
| [O-][N+](=O)c1ccc(cc1)C(=O)OC[C@H]2      |   |   | 1 |   |
| Cc1c(oc1c2ccc(Cl)cc2)C3(                 |   | 1 |   |   |
| NS(=O)(=O)c                              | 0 |   |   | 0 |
| CS(=O)(=O)Nc1ccc(Nc2c3ccccc3nc4ccc(      |   |   | 1 |   |
| CCC(=O)Oc1ccc(cc1)\C=C(/CC)\c2ccc(O      |   |   | 0 | 1 |
| NCCCC[C@H](NC(=O)[C@@H]1CCCN1C(=O)[C@@H] |   |   |   | 0 |
| COc1ccc2nc3c(cc2c1)c4cccc5cccc3c45       |   |   | 1 |   |
| CC(=CCOc1c2OC(=O)C=Cc2                   | 0 |   | 1 | 0 |
| Clc1ccc(Oc2ccc(NC=O)cc2)c(Cl)c1          |   |   | 1 |   |
| CCC(=O)C=CC                              |   |   |   | 0 |
| CC(=O)C                                  | 0 | 0 | 0 | 0 |
| CC(=O)OCC[C@@H](C=O)c1c(O)cc2C(=O        |   |   | 1 |   |
| COC(=O)C1=C(C)NC(=C([C(                  |   | 1 |   |   |
| CC[C@@H]1OC(=O)[C@H](C)[C@@H](C          |   |   | 0 |   |
| Fc1ccccc(F)c1C(=O)NC(=O)Nc2cc(Cl)c(Oc    |   |   | 0 | 1 |
| CC1CCN=C(N                               | 0 | 0 |   |   |
| CNC1Cc2cccc3cccc(C1)c23                  |   |   | 1 |   |
| CC1(C)O[C@@H]2C[C@H]                     |   | 0 |   | 0 |
| CC(C)c1cc(O(                             | 0 | 0 |   | 0 |
| CCC(=O)OCCc1ccccc1                       |   |   |   | 0 |
| C\C=N\N(C)C=O                            |   |   | 0 |   |
| CCOP(=O)(NC(C)C)Oc1ccccc1C(=O)OC(C       |   |   | 1 |   |
| CC(C)[N+](C)(CCOC(=O)C1,                 | 0 |   | 0 | 0 |
| CCOC(=O)c1ccc(C)cc1                      |   |   |   | 0 |
| CCOc1ccc(NC(=O)C)cc1[N+](=O)[O-]         |   |   | 1 |   |
| N[C@H](CS)C(=O)O                         |   |   | 1 |   |
| CCCCNC1CC(C)(C)NC(C)(C)C1                |   |   |   | 0 |





|                                                 |   |   |
|-------------------------------------------------|---|---|
| COC(=O)c1ccccc1NC(=O)c:                         | 0 |   |
| CC(C)N(C(=O)COc1nnc(s1)C(F)(F)F)c2ccc(F)cc2     |   | 0 |
| Cc1ccccc1OCC2CO2                                | 1 |   |
| Nc1nnnn1c2ccccc2                                |   | 0 |
| OC1CCN(C1)N=O                                   | 1 |   |
| Oc1ccc2c(Cc3cc(ccc23)N(=O)=O)c1                 | 1 |   |
| Nc1ccc2ccccc2c1N=Nc3ccc(cc3)[N+](=C             | 1 |   |
| CCC(C(=O)OC                                     | 0 | 0 |
| OC1=C(Oc2cc(O)ccc2C1=O                          | 0 |   |
| Nc1ncnc2c1ncn2C(c3ccccc3)c4ccccc4               | 1 |   |
| CCCCCN(CCCCC)CCCCC                              | 0 |   |
| CC(=O)O[C@                                      | 0 |   |
| OC[C@H]1O[C@H](C[C@H]1O)N2C=C(C                 | 1 |   |
| OC1(CCN(CCC                                     | 1 | 0 |
| OC(=O)C1CCN(CCC1)c2ccc(F)cc2NC(=O)NC(=O)c3cc(F) |   | 0 |
| CC(=[N+](O-))O-]C                               | 1 |   |
| CNC                                             | 0 | 0 |
| C[N+]1(CC2COC(O2)(c3ccccc3)c4ccccc4)CCCCC1      |   | 0 |
| CCCCS(=O)(=O)Cl                                 |   | 0 |
| CC(=O)c1nccs1                                   |   | 0 |
| OCC1O[C@H                                       | 0 | 0 |
| Cc1cccc2C3OC3c4cc5ccccc5cc4c12                  | 1 |   |
| [O-][N+](=O)c1cccc2c3ccccc3cc(c12)[N-           | 1 |   |
| OC(=O)CCCc1c[nH]c2ccccc12                       | 0 | 0 |
| CCOc1ccc(NC(=O)C[C@@H](C)O)cc1                  | 1 |   |
| N(c1ccccc1)c2ccccc2                             | 0 | 1 |
| CO\N=C(\C1=NOCCO1)/c2ccccc2Oc3ncnc(Oc4ccccc4(   |   | 1 |
| CCOC(C)C(=O)C(O)O                               | 1 |   |
| C1CN2CCN1CC2                                    | 0 | 0 |
| Nc1ccc(c(N)c1)[N+](=O)[O-]                      | 1 |   |
| CC\C=C(\c1ccccc1)/c2ccc(OCCN(C)C)cc             | 0 |   |
| COC(=O)C1=C                                     | 0 | 0 |
| O=C1NC(=O)                                      | 1 | 1 |
| CC(C)c1cc2CC[C@H]3[C@H                          |   | 0 |
| COc1ccc2C[C                                     | 0 | 0 |
| C1COCOC1                                        | 1 |   |
| CC(C)COC(=O)CC(C(=O)OCC(C)C)S(=O)(=O)[O-]       |   | 0 |
| CCCCCCC=O                                       | 0 | 0 |
| OC(=O)c1cc(cc(c1)N(=O)=O)N(=O)=O                | 1 |   |
| CSc1nc(NC2CC2)nc(NC(C)(C)C)n1                   |   | 1 |
| NCCCC(N)(C(F)F)C(=O)O                           | 0 |   |
| ClC1=C(Cl)C(Cl)(C(=C1Cl)Cl)C2(Cl)C=C(C          | 1 |   |
| OC(=O)C1CCCN1                                   |   | 0 |

|                                                  |   |   |   |
|--------------------------------------------------|---|---|---|
| CC[S+](=O)([O-])CCn1c(C)I                        | 0 |   |   |
| C[C@@H]1CC[C@@H](\C=C(/C)\C(=O)O)C2=C(C)C[C@H]1C |   |   | 0 |
| CC[C@@H](C)[C@H]1CN(C)C1                         | 0 |   |   |
| Oc1c(Br)cc(Br)c2cccnc12                          | 0 |   | 0 |
| OCCN1CCCC1=O                                     |   |   | 0 |
| c1ccc2c(c1)cnc3ccccc23                           |   | 1 |   |
| [O-][N+](=O)c1c(Cl)c(Cl)cc(Cl)c1Cl               |   | 0 |   |
| Cc1cccc2ncccc12                                  |   | 1 |   |
| [O-][N+](=O)                                     | 0 | 0 |   |
| CCCCOCCOCCSC#N                                   |   | 0 | 0 |
| OCCN(CCO)c1ccc2ccccc2c1                          |   | 1 |   |
| CCC(C)Nc1ccc(NC(C)CC)cc1                         |   | 0 | 1 |
| O=N(=O)c1ccc(Nc2ccccc2)cc1                       |   | 0 | 1 |
| CCCCCC=[N+](O)[O-]                               |   | 0 |   |
| C=CC(=O)OCCCCCOC(=O)C=C                          |   | 0 | 0 |
| N=C(Nc1ccccc1)Nc2ccccc2                          | 0 | 1 |   |
| CC(N)[C@H](C)C                                   | 0 | 0 |   |
| CCC(C)C                                          |   | 0 |   |
| Cc1ccc(Nc2ccc(cc2)[N+](=O)[O-])cc1               |   | 1 |   |
| CN1N=Nc2c(C)ccccc2                               | 0 | 0 | 0 |
| CC(=O)c1ccc(cc1)N(=O)=O                          |   | 1 | 0 |
| CN1CCN(CC1)c2cc3N(C4CC4)C5=CC(=O)C=CC5           |   | 1 |   |
| [O-][N+](=O)c1cccc(c1)C(=O)Cl                    |   | 1 |   |
| COC(=O)N1C                                       | 1 | 0 |   |
| CC1CC2OC(=O)C(=C)C2CC3(C)C(O)OC(O)C3             |   | 1 |   |
| O[C@H]([C@@H]1CO1)c2ccc3OCOC3c2                  |   | 1 |   |
| C[C@@H]1CCCC[C@H]1NC(=O)Nc2ccccc2                |   | 0 |   |
| COC(=O)CC(C)C                                    | 0 | 0 | 0 |
| ON1C(=O)CCC1=O                                   |   | 0 |   |
| CCC(C)S                                          |   |   | 0 |
| FC(F)(F)c1cccc(CN2C3C2c4ccccc4c5ccccc5)1         |   | 1 |   |
| OC1CCN(CCC)C1                                    | 1 | 1 |   |
| CCCCCCCCCCCC[C@H]1CO1                            |   | 0 |   |
| COC(=O)c1cccc(c1)C(=O)OC                         |   |   | 0 |
| CCN(CCC)CCCNc1c2CCCCc2nc3ccccc13                 |   | 1 |   |
| COCOC                                            |   | 0 |   |
| OC1C=Cc2c(cc3ccc4c(O)ccc5ccc2c3c45)C(=O)1        |   | 1 |   |
| C1CN(CCN1)c2cccc3ccccc2                          |   | 1 |   |
| COC(=O)[C@@H]1[C@H](C)CC1                        |   | 1 |   |
| Cc1ccc2cc3c(ccc4ccccc34)c5CCc1c25                |   | 1 | 1 |
| OCCS(=O)(=O)[O-]                                 |   |   | 0 |
| O=C1Oc2cccc3ccc4c5ccccc5cc1c4c23                 |   | 1 |   |
| o1ccc2ccccc12                                    |   | 0 | 0 |

|                                                     |   |   |   |   |
|-----------------------------------------------------|---|---|---|---|
| <chem>COC(=O)c1oc(c(Cl)c1Cl)N(=O)=O</chem>          |   |   | 1 |   |
| <chem>CCC(C)(C)c1ccc(O)cc1</chem>                   | 0 |   | 0 | 1 |
| <chem>Oc1ccc(\C=Cl</chem>                           | 0 | 0 |   |   |
| <chem>Cc1c(Nc2nccc</chem>                           | 0 | 0 |   | 1 |
| <chem>CN(C)c1[nH]cnc2ncnc12</chem>                  |   |   | 1 |   |
| <chem>CC(C)CNc1snc2ccccc12</chem>                   |   |   | 0 |   |
| <chem>CCCCCCCCC\C=C\[C@H]1CC(=O)OC1=C</chem>        |   |   | 0 |   |
| <chem>NCCCCNC(=N</chem>                             | 0 | 0 |   |   |
| <chem>OC1=NCCCN1N=Cc2oc(cc2)N(=O)=O</chem>          |   |   | 1 |   |
| <chem>CC(C)N1CCN(</chem>                            | 1 | 1 |   |   |
| <chem>Cc1ccc(Nc2ccc(O)c3C(=O)c4ccccc4C(=O</chem>    |   |   | 0 | 0 |
| <chem>CC1=C(Oc2c(</chem>                            | 0 | 0 | 0 | 0 |
| <chem>O=N(=O)c1c2ccccc2cc3ccccc13</chem>            |   |   | 1 | 1 |
| <chem>Cc1ccc2cc3ccc4ccccc4c3cc2c1</chem>            |   |   | 1 |   |
| <chem>Nc1ccc(N)c(c1)S(=O)(=O)O</chem>               |   |   | 0 |   |
| <chem>CN1CC(O)C(O)C(O)C1CO</chem>                   |   | 0 |   |   |
| <chem>Cc1c2c3ccccc4ccccc(c2c(C)c5ccccc15)c34</chem> |   |   | 1 |   |
| <chem>Cn1cnc(c2ccccc2)c1[N+](=O)[O-]</chem>         |   |   | 1 |   |
| <chem>OC(=O)c1c(Cl)ccc(Cl)c1Cl</chem>               |   |   |   | 0 |
| <chem>ClC(Cl)(Cl)N(=O)=O</chem>                     |   |   | 1 | 0 |
| <chem>CCC(C)C(C(CC(=O)N1CCCC1C(OC)C(C)C(=</chem>    |   |   | 0 |   |
| <chem>N#CCCCC(CCC#N)C#N</chem>                      |   |   |   | 0 |
| <chem>Cc1ccccc(C)c1</chem>                          |   |   | 0 | 0 |
| <chem>c1ccc2[nH]c(</chem>                           | 0 | 0 | 1 | 0 |
| <chem>Cc1ccccc2ccccc12</chem>                       |   |   | 0 | 0 |
| <chem>NCCCCNCCCN</chem>                             | 0 | 0 |   |   |
| <chem>CCN(CCCO)N=O</chem>                           |   |   | 1 |   |
| <chem>CC(=O)Oc1cc(c2ccc3ccccc4ccc1c2c34)N(=</chem>  |   |   | 1 |   |
| <chem>Cc1ccc2c(C)c3ccccc3c(C)c2c1</chem>            |   |   | 1 |   |
| <chem>ClP(Cl)(Cl)(Cl)Cl</chem>                      |   |   |   | 0 |
| <chem>O=C1C(=O)c2c(ccc3ccccc23)c4ccccc14</chem>     |   |   | 0 |   |
| <chem>COc1cc(Cl)c(OC)cc1N</chem>                    |   |   |   | 0 |
| <chem>CCc1ccccc(CC)c1N</chem>                       |   |   | 1 | 0 |
| <chem>O[C@H](C(=O)c1ccccc1)c2ccccc2</chem>          |   |   | 0 |   |
| <chem>COC(=O)C1=C(C)C(OC1=O)C(C)C</chem>            |   |   | 1 |   |
| <chem>[O-][N+](=O)c1ccc2[nH]ccc2c1</chem>           |   |   | 1 |   |
| <chem>CCC1(O)CC(O)c2c(O)c3C(=O)c4c(O)ccccc</chem>   |   |   | 1 |   |
| <chem>FC(F)(F)c1cc(c(Cl)c(c1)N(=O)=O)N(=O)=</chem>  |   |   | 0 |   |
| <chem>N[C@@H](C</chem>                              | 0 |   |   |   |
| <chem>C[N+](C)(C)Cc1ccccc1</chem>                   |   |   | 0 | 0 |
| <chem>OC1C(O)c2cc3ccc4ccccc5ccc(c2C(O)C1S(=</chem>  |   |   | 0 |   |
| <chem>CCC1C(=NN=</chem>                             | 0 | 0 |   | 0 |
| <chem>COC(=O)C1=C(C(C)OC1=O)c2ccccc2</chem>         |   |   | 0 |   |

|                                             |   |   |   |   |
|---------------------------------------------|---|---|---|---|
| [O-][N+](=O)c1ccc2snc(Cl)c2c1               |   |   | 1 |   |
| CCC(CO)NCCNC(CC)CO                          |   |   | 0 |   |
| CCCC1CCCCN                                  | 0 | 0 |   | 0 |
| CC(C)Oc1ccc2C(=O)c3cc(cc                    |   | 0 |   |   |
| NC(=N)NCC1                                  | 0 | 0 |   | 0 |
| Oc1ccc(c(c1)N(=O)=O)N(=O)=O                 |   |   | 1 |   |
| CCCO(=O)c1                                  | 0 | 0 |   | 0 |
| C1COCCN1                                    |   |   | 0 | 0 |
| OC(=O)Cc1ccc(cc1)[N+](=O)[O-]               |   |   | 1 |   |
| Nc1ccc2C(=O)NSc2c1                          |   |   | 0 |   |
| CCCCCOc1ccc(cc1)N=O                         |   |   | 1 |   |
| Nc1ncnc2c1ncn2c3ccc(cc3)N(=O)=O             |   |   | 1 |   |
| CC1(C)[C@H](CC[C@@]2(C)[C@H]1CC[C@]3(C)[C@C |   |   |   | 0 |
| CCCC(CC)COC(=O)c1ccc(N(C)C)c(c1)[N-         |   |   | 1 |   |
| OC(=O)Cc1cccnc1C(=O)O                       |   | 0 |   |   |
| Oc1ccc(C(=O)c2ccccc2)c(O)c1O                |   |   |   | 1 |
| ClCc1ccccc1Cl                               |   |   | 0 |   |
| Cc1ccccc1S                                  |   |   |   | 0 |
| Oc1ccc2c(O)c3ccccc3cc2c1O                   |   |   | 1 |   |
| CCc1c2CN3C(                                 | 0 | 0 |   | 1 |
| C[C@H](Cc1ccccc1)N(C)CC                     |   | 0 |   | 0 |
| CC1CC2OC3C(O)C(O)C(C)(C34CO4)C2(CC          |   |   | 0 |   |
| CN(C)CCN(Cc                                 | 1 | 0 | 0 |   |
| OCC1CCC2C3CC(CC3CO)C12                      |   |   |   | 0 |
| CCSC(=O)N1CCCCC1                            |   |   | 0 | 0 |
| OCCI                                        |   |   | 1 |   |
| CN1CCN(Cc2,                                 | 0 | 1 |   | 1 |
| CN(C)CCCO[C@H]1[C@H](O[C@@H]2OC(C)(C)O[C@H  |   |   |   | 0 |
| O1[C@@H]2[C@H]1c3c(c4ccccc24)c5cc           |   |   | 1 |   |
| O=C(OCc1ccc                                 | 0 | 0 |   |   |
| C[C@@H]1O[C@@H](OC[                         |   | 0 |   |   |
| CCOC(=O)\C=C\c1oc(cc1)[N+](=O)[O-]          |   |   | 1 |   |
| BrC\C=C/CBr                                 |   |   | 1 |   |
| CN(C)C(=N)N                                 | 0 | 0 |   | 0 |
| C=CC(=O)OCC1CCCO1                           |   |   |   | 0 |
| OCc1occc1                                   |   |   | 0 | 0 |
| C[C@@H](NCCc1ccc(O)cc:                      |   | 0 |   |   |
| OS(=O)(=O)c1ccccc1                          |   |   | 0 | 0 |
| CC1(C)[C@@                                  | 0 | 0 |   |   |
| Nc1ccc(cc1Br)c2ccc(N)c(Br)c2                |   |   | 1 |   |
| CCCC1N(C=C(CC)C=C1CC)c2ccccc2               |   |   |   | 1 |
| CCCCCCCC(=C                                 | 0 | 0 | 1 | 0 |
| C[C@@H]1C[C@H]2[C@@H]3C[C@H](F)C4=CC(=O)C   |   |   |   | 0 |

|                                          |   |   |   |
|------------------------------------------|---|---|---|
| CC(=O)Oc1cc                              | 0 | 0 | 0 |
| CCCC(=O)Nc1c(l)cc(l)c(CC(CC)C(=O)[O-])c1 |   |   | 0 |
| O[C@@H]1O[C@@H](CO                       |   | 0 |   |
| Cc1c(C(=O)O)c(O)cc2C(=O)c3c(O)c(O)c(     | 1 |   |   |
| NP(=O)(OCCC(=O)O)N(CCCl)CCCl             | 1 |   |   |
| ClCCOC(=O)C=C                            | 1 |   | 0 |
| CN[C@H](C)[C@@H](O)c1ccccc1              | 0 |   |   |
| O=N(=O)c1ccccc1Nc2ccccc2                 | 0 |   | 0 |
| Oc1ccccc1\C=N\c2snc3ccccc23              | 0 |   |   |
| CCC(C)NC(=O)N                            |   |   | 0 |
| CS(=O)C                                  | 0 |   | 0 |
| O=N(=O)c1ccc2Oc3cc(ccc3Oc2c1)N(=O)       | 1 |   |   |
| CCCCCCCCC                                | 0 |   | 0 |
| C\C=C(/C)\C(=O)OCc1ccccc1                |   |   | 0 |
| CCNC(=N)N(N=O)[N+](=O)[O-]               | 1 |   |   |
| O1C2C1c3c(c4ccccc24)c5ccccc5c6ccccc3     | 1 |   |   |
| CCCCCCCCCOC(=O)CCCC(=O)OCCCCCCC          |   |   | 0 |
| CCCCCCCC(=O)CCc1ccc(O)c(OC)c1            | 0 |   |   |
| OC[C@@H](O)[C@@H](O[C@@H]1O[C@H](CO)[C@  |   |   | 0 |
| CCBr                                     | 1 |   | 0 |
| O=N(=O)c1ccc(OCC2CO2)cc1                 | 1 |   |   |
| Nc1nc(nc2c1ncn2c3ccc(cc3)[N+](=O)[O-     | 1 |   |   |
| Nc1ncnc2c1ncn2[C@@H]3CC[C@H](CO          | 1 |   |   |
| C[C@@H]1C(C)(C)c2cc(C)c(cc2C1(C)C)C      | 0 |   |   |
| CCCCCCCCCCCCCCCCCOC(=O)CCc1cc(c(         | 0 |   |   |
| CCC(=O)O[C@@]1([C@@H](C)C[C@H]2[C@@H]3CC |   |   | 1 |
| NC1=Nc2c(ncn2[C@@H]3                     |   | 0 |   |
| CC(C)OP(=O)(C)OC(C)C                     |   |   | 0 |
| O=N(=O)c1ccc2ccc3cc4ccccc4c5ccc1c2c      | 1 |   |   |
| ClC1=C(Cl)C1(Cl)Cl                       |   |   | 0 |
| CN1C(c2ccc(Cl)cc2)[S+](=C                |   | 0 |   |
| CC(C)C[C@@                               |   | 0 |   |
| N1C2C1c3cccc4C5NC5c6cccc2c6c34           | 1 |   |   |
| NC(C(=O)O)c1nn[nH]1                      |   | 0 |   |
| CC1(CO)C(O)CCC2(C)C1CCC3CC4CC23CC        | 0 |   |   |
| CC1=CC(=O)Oc2cc(O)cc(O)c12               | 0 |   | 1 |
| NC=O                                     | 0 |   | 0 |
| OC1C=Cc2cc3ccc4ccc(c5ccc(c2C1O)c3c4      | 1 |   |   |
| Clc1ncc2ccccc12                          | 0 |   |   |
| NNCc1ccccc1                              |   |   | 1 |
| CC(C)CC(C)O                              | 0 |   | 0 |
| C(C1CCNCC1)c2c[nH]cn2                    |   | 0 |   |
| CC(C)C1(O)CCC(=CC1)C                     |   |   | 0 |

|                                                 |   |   |
|-------------------------------------------------|---|---|
| [O-][N+](=O)c1ccc2c3ccccc3c4cccc1c24            | 1 |   |
| CCN(CC)CCOC(=O)C(CC1CCCO1)Cc2cccc3ccccc23       |   | 0 |
| Cn1c(NO)nc2ncc(cc12)c3ccccc3                    | 1 |   |
| Cc1c(cc(cc1N(=O)=O)N(=O)=O)N(=O)=C              | 1 |   |
| OC(=O)c1ccccc1Nc2cc(Cl)ccc2C(=O)O               | 0 |   |
| N[C@@H](CCC(=O)NNc1ccccc1)C(=O)O                | 1 |   |
| O[C@H]1[C@@H](O)[C@                             | 0 |   |
| CC(C)(C)C1=CC(=CC=C2C=C(C(=O)C(=C2)             | 0 |   |
| C[N+](C)(C)C                                    | 0 | 0 |
| FC(F)(F)I                                       | 1 |   |
| OS(=O)(=O)c                                     | 0 | 0 |
| COc1ccc2cc(ccc2c1)S(=O)(=O)N[C@H](CC(=O)N[C@H   |   | 1 |
| CN(C)C(=O)C                                     | 0 | 0 |
| O=C(CN1C(=O)Sc2ccccc12)OCc3ccccc3               | 0 |   |
| OCC(O)[C@H                                      | 0 | 0 |
| Nc1c2C(=O)c3ccccc3C(=O)c2c(NC4CCCC              | 0 |   |
| CC(C)(c1ccc(OP(O)O)cc1)c2ccc(OP(O)O)            | 0 |   |
| Nc1nc(nc2c1ncn2C3CC(O)C(CO)O3)c4cc              | 1 |   |
| Cc1ccc2nc3c(ccc4ccccc34)c(CO)c2c1               | 1 |   |
| C[N+](CCC(                                      | 0 | 0 |
| CCOP(=S)(OC(C)C)Oc1cnc(nc1)C(C)(C)C             |   | 0 |
| CC[N+](([O-])(CC)CCNc1ccc(CO)c2Sc3ccc           | 1 |   |
| CCCC=CCC=O                                      | 1 |   |
| CS(=O)(=O)c1ccc(C(=O)C2C(=O)CCCC2=O)c(c1)N(=O): |   | 1 |
| C=CCCCCCCCC=O                                   |   | 0 |
| CCCCN1CN(C)C=C1                                 |   | 0 |
| C=CCOCC1CO1                                     | 1 | 0 |
| ClC(=C)Cl                                       | 1 | 0 |
| CCC1OC(=O)(                                     | 0 | 0 |
| Fc1ccccc1c2ccccc2                               | 0 | 0 |
| C(C1CO1)c2ccc(Cc3ccccc3)cc2                     | 1 |   |
| O=C(Cc1ccccc1)OCc2ccccc2                        |   | 0 |
| C(\C=C\c1ccc                                    | 1 | 1 |
| O=N(=O)c1ccc(cc1)c2ccc(cc2N(=O)=O)N             | 1 |   |
| CCN1CCC[C@H]1CNC(=O)c2cc(ccc2OC)S(=O)(=O)N      |   | 0 |
| CC(C)Cc1ccc(cc1)C(=O)C                          | 0 |   |
| O1C2C1c3cc4ccccc4c5ccc6cccc2c6c35               | 1 |   |
| OC[C@@H](I                                      | 0 | 0 |
| ClC1=C(Cl)[C@@]2(Cl)[C@H]3[C@H]4[C@H]([C@@      |   | 1 |
| COc1cc2CC(C)(C)n3c(cc4nc                        |   | 0 |
| OC1C=Cc2cc3ccc4c(ccc5ccc(c2C1O)c3c4             | 1 |   |
| NCCCC(=O)O                                      | 0 | 0 |
| Cc1ccc(cc1N)N=Nc2ccc(C)c(N)c2                   | 1 |   |

|                                                 |   |   |   |   |
|-------------------------------------------------|---|---|---|---|
| C1CN=C(N1)c2cnc3ccccc3r                         | 0 |   |   |   |
| O=C1c2ccccc2c3ccc4ccccc4c13                     |   |   | 0 |   |
| CS(=O)(=O)c1ccc(Cl)cc1                          |   |   | 0 | 0 |
| CC[C@](N)(CCC(=O)O)C(=                          | 0 |   |   |   |
| Cc1cccc(c1)C#N                                  |   |   | 0 |   |
| [O-]C1=NC(=                                     | 0 | 0 |   |   |
| OC(=O)c1ccc(Cl)cc1Cl                            |   |   | 0 | 0 |
| CC(N)CCN                                        |   |   | 0 |   |
| O=Cc1ccc(cc1)N(=O)=O                            |   |   | 1 | 0 |
| CC(=O)NCCc1                                     | 0 |   |   |   |
| OC(=O)CCC(=O)Nc1ccc(cc1                         |   | 0 |   |   |
| NC1=NC(=O)c2ncn(CCC(CO)CO)c2N1                  |   |   |   | 0 |
| Oc1ccc2C=CC                                     | 0 | 0 |   |   |
| CC(=O)OCc1occc1                                 |   |   | 1 | 0 |
| C[C@@H](Cl                                      | 1 | 1 |   |   |
| C[C@]12CC[C@H]3[C@@H](CCc4cc(OS(=O)(=O)O)cc     |   |   |   | 0 |
| C=C(CCC#N)C#N                                   |   |   |   | 0 |
| C\C=C\C=C(O)\C=C\C=C(/C)\C=CC1=C(C)CCCC1(C)C    |   |   |   | 1 |
| CCOC(=O)C=CC(=O)O                               |   |   |   | 0 |
| Fc1ccccc1                                       |   |   | 1 | 0 |
| Nc1ccc2nc3ccccc3cc2c1                           |   |   | 1 |   |
| N1[C@@H]2[C@H]1c3c(ccc4ccccc34)c5               |   |   | 1 |   |
| Cc1cc(C)cc(c1)N(=O)=O                           |   |   |   | 0 |
| OC(=O)c1ccc                                     | 0 | 0 |   | 0 |
| CCCCCCC(O)CCCCCCCCC(=O)O                        |   |   |   | 0 |
| CC(C)NCC(O)COc1cccc2CC(O)COc12                  |   |   | 0 |   |
| O=C(C1OC1c2ccccc2)c3ccc(cc3)c4ccccc4            |   |   | 0 |   |
| CCN(CC)C(=S)[S-]                                |   |   |   | 0 |
| Cc1ccc(cc1S(=O)(=O)O)N=Nc2c(O)c(cc3             |   | 0 |   |   |
| CCCCCCCCC[N+](C)(C)CC(=O)[O-]                   |   |   |   | 0 |
| Nc1nc(Cl)nc2c1ncn2[C@@                          |   | 0 |   |   |
| COc1cc(OC)nc(NC(=O)[N-]S(=O)(=O)c2ncccc2OCC(F)( |   |   |   | 0 |
| CCCCCCC(C)O                                     |   |   |   | 0 |
| CN(C)CCOC(c                                     | 1 | 0 | 0 | 0 |
| [O-][N+](=O)c1c2C=CCCc2c3ccc4cccc5c             |   |   | 1 |   |
| COC(=O)c1ccc2cc(ccc2c1)C(=O)OC                  |   |   |   | 0 |
| COc1ccc(cc1)C(OCCN2CCC                          |   | 0 |   |   |
| Cc1ncc(COP(:                                    | 0 | 0 |   | 0 |
| COc1ccc2c(ccc3oc(cc23)[N+](=O)[O-])c:           |   |   | 1 |   |
| OCCN1CCNCC1                                     |   |   | 0 | 0 |
| O=N(=O)C1=Cc2cccc3cccc1c23                      |   |   | 1 |   |
| Nc1cc(cc2cc(c(N=Nc3ccccc3)c(O)c12)S(            |   |   | 0 |   |
| CC(=O)[C@H                                      | 0 | 1 |   |   |

|                                                   |   |   |   |
|---------------------------------------------------|---|---|---|
| Oc1ccc2C[C@                                       | 1 | 0 |   |
| CC(CN)CC(C)(C)CCN                                 |   |   | 0 |
| NC(CCC(=O)NC(CSc1ccc(cc1[N+](=O)[O-               | 1 |   |   |
| [O-][N+](=O)c1ccc2Oc3ccccc3Oc2c1                  | 1 |   |   |
| [O-][S+]1(=O)NC(=O)c2ccc                          | 0 |   |   |
| CC1(C)S[C@@H]2[C@@H](NC(=O)Cc3c                   | 0 |   |   |
| C[C@]12CC[C                                       | 0 | 0 |   |
| Cn1c(nc2c3cccnc3ccc12)N(=O)=O                     | 1 |   |   |
| Nc1c(cc(c2C(=O)c3ccccc3C(=O)c12)[N+               | 1 |   |   |
| Cc1nn(c(C)c1C=NN2CCN(C                            | 0 |   |   |
| CC(C)CCCCOC(=O)CCS                                |   |   | 0 |
| Nc1cc(ccc1O)N(=O)=O                               | 1 |   | 1 |
| NC(C(=O)O)c1cccc(O)c1                             | 0 |   |   |
| Oc1ccc2c(cccc2c1)S(=O)(=O)O                       | 0 |   |   |
| COc1cc2CCN(C)[C@H]3Cc                             | 0 |   |   |
| CCC(=[N+](O)[O-])C(C)O                            | 0 |   |   |
| Cc1ccc(cc1)[N+](=O)[O-]                           | 0 |   |   |
| CO[C@@H](                                         | 0 | 0 |   |
| C1=Cc2c3c1cccc3cc4ccc5ccccc5c24                   | 1 |   |   |
| OCC(=O)CO                                         | 1 |   |   |
| CC(=C)CC(C)(C)C                                   |   |   | 0 |
| CCNC(=O)NCCCOc1cccc(CN2CCCC2)c1                   |   |   | 0 |
| CCCCC(=O)O[C@@]1([C@@H](C)C[C@H]2[C@@H]3          |   |   | 1 |
| OC(=O)CONC(=O)c1cccc1                             |   |   | 0 |
| CC(C)OP(=O)                                       | 0 | 0 |   |
| CC(C)(C)c1ccc(cc1)C(=O)O                          |   |   | 0 |
| CC(Oc1ccc(Cl)cc1C)C(=O)O                          | 0 |   | 0 |
| Nc1ccc(c(Cl)c1)c2ccc(N)cc2Cl                      | 1 |   |   |
| COc1ccc(C[C                                       | 1 | 0 | 0 |
| C1CN(CCO1)SSc2nc3ccccc3s2                         |   |   | 1 |
| Oc1cc(O)c2C(=O)c3ccccc3                           | 0 | 1 | 1 |
| Nc1ncnc2c1r                                       | 0 | 0 |   |
| Nc1ccc2c3ccccc3[nH]c2c1[N+](=O)[O-]               | 1 |   |   |
| CSc1ccc(C=O)cc1                                   |   |   | 0 |
| OCCN(CCO)c1cccc(Cl)c1                             |   |   | 0 |
| CC(C)(c1cccc1)c2cc(c(O)c(c2)C(C)(C)c3ccccc3)n4nc5 |   |   | 0 |
| CCOP(=O)(CN(CCO)CCO)OCC                           |   |   | 0 |
| CCC1=C(O)C(=O)c2c(O)c(O)c(O)c(O)c2C               | 1 |   |   |
| Nc1ccc2C3=Nc4ccccc4C(=O)N3Cc2c1                   | 1 |   |   |
| c1ccc2c(c1)ccc3c4ccccc4ccc23                      | 1 |   | 0 |
| CCOP(=S)(OCC)SC1OCCOC1SP(=S)(OCC)                 | 1 |   |   |
| CCCCCCCCC(=O)N(C)C                                |   |   | 0 |
| Cc1cccc(c1C(O)O)[N+](=O)[O-]                      | 1 |   |   |



|                                                                 |   |   |
|-----------------------------------------------------------------|---|---|
| FC(F)(F)C(F)(F)C(Cl)Cl                                          | 0 |   |
| CC(=C)C(=O)N                                                    |   | 0 |
| CN(C)C1[C@H](O)C1                                               | 0 |   |
| CN1CCc2cc(Br)c(O)cc2C(C)C                                       | 0 |   |
| OC(NC(=O)N)C1=CC=CC=C1                                          | 0 | 0 |
| [O-][N+](=O)c1cc2cccc(c2cc1[N+](=O)[O-])C(=O)c1cccc(Oc2cccc2)c1 | 1 | 0 |
| Clc1ccc(COC(=O)c2cccc3cccnc23)c(Cl)c1                           | 0 |   |
| OC1OC(=O)C(=C1Cl)Cl                                             | 1 |   |
| O=C(OCCOCCOC(=O)c1cccc1)c2cccc2Cc1nc2cccc2                      |   | 0 |
| OCC1OC(CC1O)N2C=C(l)C(=O)NC2=O                                  | 0 |   |
| Oc1ccc2ccc3ccc(c4ccc1c2c34)[N+](=O)[O-]                         | 1 |   |
| CC(=O)OCc1c2cccc2cc3c1ccc4cccc34                                | 1 |   |
| COC(C)C(C)C                                                     | 0 | 0 |
| CCN(CC)c1ccc(cc1)N=O                                            | 1 |   |
| OC(=O)c1cc(ccc1N(=O)=O)N(=O)=O                                  | 1 |   |
| CCCC(CC)COC(=O)c1ccc(cc1)C(=O)OCC1                              | 0 | 0 |
| Cc1ccc(CO)cc1                                                   | 0 | 0 |
| CC(=O)N1CCN(CC1)c2ccc(cc2)C                                     | 1 |   |
| CCN(CC)c1ccc(cc1)C                                              | 0 | 0 |
| CCOC(=O)C1=CC=CC=C1                                             | 0 | 0 |
| COc1cc2OC3OCCC3c2c4OC(=O)C5=C(C)CC1c2cccc2c3c1ccc4ccc5cccc5c34  | 1 | 0 |
| C1c2cccc2c3c1ccc4ccc5cccc5c34                                   | 0 |   |
| [O-][N+](=O)c1ccc2c(c1)[nH]c3cccc23                             | 1 |   |
| C1CCCCC1                                                        |   | 0 |
| Nc1ccc(c(Cl)c1)c2ccc(N)c(Cl)c2                                  | 1 |   |
| CC1CN(N=O)C(C)CN1N=O                                            | 1 |   |
| CC\C=C\C=C\C=C\C=C\C=C\C=C\OCC(O)c1ccc(cc1)C                    | 1 |   |
| CC(C)[N+](=O)[O-]                                               | 1 |   |
| [O-][N+](=O)c1ccc2Oc3ccc(cc3Oc2c1)[N+](=O)[O-]                  | 1 |   |
| CC1(C)C[C@H](C)[C@H](C)(CN=C=O)C1N#C                            | 0 |   |
| N#CSc1ccc2c(c1)C(=O)N2                                          | 0 | 0 |
| Nc1ccc(cc1[N+](=O)[O-])[N+](=O)[O-]                             | 1 |   |
| CCC1OC(=O)C(C)C(OC2CC(C)(OC)C(O)C(=O)C(=O)O)C(=O)O              | 0 | 0 |
| CO[C@H]1[C@@H](C[C@@H]2CN3CCc4c([nH]c5cc(C)C=C5)C=C4)C=C1       | 0 | 0 |
| CIN1C(=O)NC(=O)N(Cl)C1=O                                        | 0 | 0 |
| ClC(Cl)(Cl)[C@@H]1CO1                                           | 1 |   |
| Cc1c(cc(cc1[N+](=O)[O-])[N+](=O)[O-])C(=O)c2c1O                 | 1 |   |
| Cc1cc(O)c2C(=O)c3cccc3C(=O)c2c1O                                | 1 |   |
| [O-][N+](=O)c1cccc2nc3cccc(c3nc12)[N+](=O)[O-]                  | 1 |   |
| CCN(Cc1ccc(Cl)nc1)\C=C\N(=O)=O\NC                               |   | 0 |

|                                            |   |   |   |
|--------------------------------------------|---|---|---|
| Cc1ccc2OC(=C(O)C(=O)c2c                    | 0 |   |   |
| O[C@@H]1C=Cc2c(ccc3c4cccc4c(cc23)          |   | 1 |   |
| [O-][N+](=O)c1ccc(cc1)[N+](=O)[O-]         |   | 1 |   |
| Nc1ccc(Nc2cccc2)cc1                        |   | 0 | 0 |
| CC(C)(N=NC(C)(C)C#N)C#N                    |   | 0 | 0 |
| COC(=O)C(=C)C                              |   | 0 | 0 |
| C[C@@H](NCc1cc(Br)cc2                      | 0 |   |   |
| CC(=O)CCC1C2CC3C(CC12C)OC(=O)C3=C          |   | 0 |   |
| CC1=CN([C@H]2C[C@H](F)[C@@H](CO)O2)C(=O)NC |   |   | 0 |
| CC(C)(C)NCC(O)COc1cccc1C2=CCCC2            |   | 0 |   |
| CN1CC[C@]2                                 | 1 | 0 |   |
| COC1=C(OC)                                 | 0 | 0 |   |
| Nc1cc(ccc1Cl)C(=O)O                        |   |   | 0 |
| Cc1ccc(cc1)c2cccc2                         |   |   | 0 |
| Cc1cc(C)c(c(C)c1)[S+](=O)                  | 0 |   |   |
| NC(=O)c1ncr                                | 0 | 0 | 0 |
| CC[C@@]1(CC(=O)O)OCCc2c1n(C)c3ccc          | 0 |   |   |
| CO\N=C\C(=                                 | 0 | 0 |   |
| CNC(=O)c1cc                                | 0 | 0 |   |
| N[C@@H]1C                                  | 0 | 0 | 0 |
| Cc1cc(C)c2c(ccc3cccc23)c1                  |   | 1 |   |
| Clc1cccc(c1)N2CCNCC2                       |   |   | 0 |
| FC(F)(F)c1cci                              | 1 | 0 |   |
| CN(N=O)C(=N)NN(=O)=O                       |   | 1 | 0 |
| [O-][N+](=O)c1ccc2c(oc3ccc(cc23)[N+](      | 1 |   |   |
| CC(C)CCOCc1cccc1                           |   |   | 0 |
| Cc1sc(N)c(C(=O)c2cccc(c2                   | 0 |   |   |
| CCC(=O)OCc1cccc1                           |   |   | 0 |
| COP(=S)(OC)                                | 0 | 0 |   |
| CC(C)(C)C(=O)C(Oc1ccc(Cl)                  | 0 | 0 |   |
| CC(C)(C)OC(=O)N\N=C\C1=CN(O)c2cccc         | 1 |   |   |
| CCOc1ccc(NC(=O)OC(C)C)cc1OCC               |   |   | 0 |
| CCCCCOCCOCCO                               |   |   | 0 |
| CN(C)CCNC(=O)c1ccc2ccc3cccnc3c2n1          |   | 1 |   |
| CN[C@@H]1[C@@H](O)[C@@H](O[C@@H]2[C@@      |   |   | 0 |
| Clc1ccc(CSc2ccc(Cl)cc2)cc1                 |   | 0 |   |
| COc1cccc2OC(CC(=O)c12)c                    | 0 |   |   |
| O[C@@H]1[C@@H](O)c2cccc3c4c(ccc5           | 1 |   |   |
| CCOC(OCC)P(=O)(O)CCCN                      | 0 |   |   |
| Oc1c(Cl)cc(Cl)cc1C(=O)Nc2ccc(Cl)c(Cl)c2    |   |   | 1 |
| CCOC(=O)C(=NNc1ccc(cc1)c2ccc(NN=C(         | 0 |   |   |
| Cc1c2cccc2c(C3CO3)c4cccc14                 | 1 |   |   |
| COc1cc(CNC(=O)C(C)Br)ccc1O                 | 1 |   |   |

|                                                |   |   |
|------------------------------------------------|---|---|
| OC[C@H]1O[C@@H](Oc2ccc(O)cc2)[C@H](O)[C@@      | 0 | 0 |
| CCCCCCC[C@H]1CO1                               | 0 |   |
| C[C@@H]1O[C@H]1c2ccccc2                        | 0 |   |
| OC1=NCCN1N=Cc2oc(cc2)N(=O)=O                   | 1 |   |
| CC(C)(C)OC(=O)N1C[C@@H](F)C[C@H]1C(=O)O        | 0 |   |
| Cc1nc(O)c(cc1c2ccncc2)C#N                      | 0 |   |
| Oc1cc2CCN(CC=C)CC(c3ccc                        | 0 |   |
| C=CCNCC=C                                      | 0 | 0 |
| ONc1ncnc2c1ncn2Cc3ccccc3                       | 1 |   |
| CCC(=O)OCc1cccc(c1)[N+](=O)[O-]                | 0 |   |
| CCCC(Cn1cncn1)(C#N)c2ccc(Cl)cc2                | 0 |   |
| CN(C)CCS                                       | 0 | 0 |
| OC(=O)Cc1cccc(c1)N(=O)=O                       | 0 |   |
| C(OCC1CCCC1)c2ccccc2                           | 0 | 0 |
| Nc1nc(cs1)C(                                   | 0 | 0 |
| [O-][N+](=O)c1ccc(Oc2ccc(cc2)N=C=S)c           | 1 |   |
| COc1nsc2c(cccc12)N(=O)=O                       | 1 |   |
| CC1(C)S[C@@H]2[C@H](NC(=O)Cc3ccccc3)C(=O)N2[   | 0 |   |
| COc1cc(\C=C                                    | 0 | 0 |
| C[C@@H](O)[C@@H]1[C@H]2[C@@H](C)C(=C(N2C:      | 0 |   |
| CC(C)CCCCCOC(=O)c1ccc(C(=O)OCCCCC(C)C)c(c1)(   | 0 |   |
| CCCCCOCCO                                      | 0 |   |
| OS(=O)(=O)OCc1cc2ccccc2c3ccc4ccccc4            | 1 |   |
| O=C=NCC1CCCC(CN=C=O)C1                         | 0 |   |
| C1Cc2c(C=C1)ccc3nc4ccc5ccccc5c4cc23            | 1 |   |
| Nc1cccc2C(=O)c3c(N)cccc3C(=O)c12               | 1 |   |
| CCCCC(=O)CC                                    | 0 |   |
| CCC(COC(=O)c1cc(OC)c(O(                        | 0 |   |
| CN1C[C@@H]2[C@@H](C1)c3cc(Cl)ccc3Oc4ccccc24    | 0 |   |
| CC1(C)[C@@H](N2[C@@H](CC2=O)S1(=O)=O)C(=O)N    | 0 |   |
| O=Nc1c2ccccc2c3ccc4cccc5ccc1c3c45              | 1 |   |
| C\C=C(/Cl)\C=O                                 | 1 |   |
| OC(=O)\C=C\                                    | 0 | 0 |
| C[C@]12CCC(                                    | 0 | 0 |
| Cc1cc2c(nc(N)n2C)c3nc(C)c(C)nc13               | 1 |   |
| ClC(=C(Cl)c1c(Cl)c(Cl)c(Cl)c(Cl)c1Cl)Cl        | 0 |   |
| FC(F)(Cl)Br                                    | 0 |   |
| OCCN(C(=O)C                                    | 0 | 0 |
| CC(C)(O)C1CCC(C)(O)CC1                         | 0 |   |
| CCOP(=O)(OCC)Oc1cc(on1)c2ccccc2                | 0 |   |
| O=Cc1occc1                                     | 0 | 0 |
| NC(=N)NN=C(C=Cc1oc(cc1)N(=O)=O)C=Cc2oc(cc2)N(: | 1 |   |
| CCCCC\C=C\C                                    | 0 | 0 |

|                                             |   |   |   |   |
|---------------------------------------------|---|---|---|---|
| CCCCCCCCn1cc[n+](C)c1                       |   |   |   | 1 |
| OC(=O)\C=C\                                 | 0 |   |   |   |
| C[C@@H](N)                                  | 0 | 0 |   |   |
| Cc1ccc(NC(=O)c2csc(c2)N(=O)=O)cc1           |   |   | 1 |   |
| O=C=NCCCCCN=C=O                             |   |   |   | 0 |
| OC1(O)C(=O)c2ccccc2C1=O                     |   |   | 0 | 1 |
| CNCCS(=O)(=O)O                              |   |   | 0 |   |
| OC(=O)COc1                                  | 0 | 0 |   | 0 |
| CC(=O)OC1CCC2(C)C(CCC3                      |   | 1 |   |   |
| C[C@@]12C                                   | 0 | 0 |   |   |
| Cc1cccc(c1C(=O)O)N(=O)=O                    |   |   |   | 0 |
| O=N(=O)c1ccc2c(cc3c(cccc3c2c1)N(=O)         |   |   | 1 |   |
| COc1ccc(NC(=O)C)cc1N                        |   |   |   | 0 |
| OC[C@H]1O                                   | 0 | 0 |   | 0 |
| CC(C)NCC(O)                                 | 0 | 0 |   | 0 |
| ONc1ccc(Cl)c(Cl)c1                          |   |   | 0 |   |
| COP(=O)(NC(=O)C)SC                          |   |   | 0 | 0 |
| CCCCCCCCSCC                                 |   |   |   | 0 |
| CC(CS)C1CCC(C)C(S)C1                        |   |   | 0 | 0 |
| CN1C(=C(O)c2ccccc2S1(=O)=O)C(=O)Nc3ncc(C)s3 |   |   |   | 1 |
| Cc1cc(c(C)c2c3cc(ccc3[nH]c12)N(=O)=O        |   |   | 1 |   |
| CCCC[C@@H](CC)CN                            |   |   | 0 |   |
| CCCCOc1cc(c                                 | 1 | 0 |   | 0 |
| CC(=O)OC1Cl                                 | 0 | 0 |   |   |
| CN1CC[C@]23[C@H]4Oc5c(OC(=O)C)ccc(C[C@@H]1  |   |   |   | 0 |
| CC(C)CN(CC(C)C)CC(C)C                       |   |   | 0 |   |
| NC(CCC(=O)NC(CS\C(=C\Cl)\Cl)C(=O)NC         |   |   | 1 |   |
| C1c2cccc3ccc4c5cccc5cc1c4c23                |   |   | 1 |   |
| CCSCCCL                                     |   |   |   | 0 |
| CC[C@H](C)[                                 | 0 | 0 |   |   |
| CCCCN(CC(O)C1=CC(=N#N)C(=O)C=C1)N           |   |   | 1 |   |
| CC(C)OC(=O)C1=C(C)N=C(N)C(=C(O)OC2          |   |   | 0 |   |
| CC1OC1P(=O                                  | 0 | 0 |   |   |
| CN(c1c(cc(cc1N(=O)=O)N(=O)=O)N(=O)          |   |   | 1 |   |
| O1C2C1c3c4ccc5cccc5c4cc6cccc2c36            |   |   | 1 |   |
| COc1ccc2c(cc3N(C)CCc4cc5OCOc5c2c34          |   |   | 1 |   |
| OC1C=Cc2c(C1O)c3cccc3c4cc5cccc5cc           |   |   | 1 |   |
| Clc1cccc1Cl                                 | 0 | 0 | 0 | 0 |
| CCCCCCC\C=C\CCCC(=O)C                       |   |   |   | 0 |
| CN(C)c1ccc(cc1)N=Nc2ccc(COC(=O)C)cc         |   |   | 1 |   |
| CC1=CNC(=S)NC1=O                            |   |   |   | 0 |
| N1C2C1c3cccc3c4cccc24                       |   |   | 1 |   |
| CNN=NC                                      |   |   | 1 |   |

|                                           |   |   |   |
|-------------------------------------------|---|---|---|
| CNC(=O)ONC(=O)C                           | 1 |   |   |
| CC(=C)C(=O)OCCOCCOCCOC(=O)C(=C)C          | 0 |   | 0 |
| CCN(CC)CCO                                | 0 | 0 | 0 |
| CC(C)(N=C=O)c1cccc(c1)C(C)(C)N=C=O        |   |   | 0 |
| Nc1cc2c3ccccc3ccc2c4ccccc14               | 1 |   |   |
| OC(c1ccc(F)cc1)(c2cncnc2)c3ccccc3Cl       |   |   | 0 |
| O=C1NC2NC(=O)NC2N1                        |   |   | 0 |
| COc1cccc(\C=C\c2ccc(N)cc2)c1              | 1 |   |   |
| CC(C)(C)OC(=O)CN=N#N                      | 1 |   |   |
| CC(Br)C(=O)Nc1ccccc1                      | 1 |   |   |
| O=C(C=Cc1ccc(cc1)N(=O)=O)c2ccc(cc2)I      | 1 |   |   |
| O=C1OCCO1                                 |   |   | 0 |
| CCC1=CN(C2CC(O)C(CO)O2)C(=O)NC1=C         | 0 |   |   |
| Cc1ccccc1S(=O)(=O)[O-]                    |   |   | 0 |
| ON(=C)=O                                  | 0 |   |   |
| Nc1ncnc2c1ncn2C3OC(CO)CC3O                | 1 |   |   |
| CNc1c2CCCC                                | 0 | 0 | 0 |
| CCc1ccccc1O                               | 1 | 1 |   |
| CCCCCCCC                                  |   |   | 0 |
| OC1C2OC2c3ccc(O)c4c5C(=O)C6OC6c7c         | 1 |   |   |
| Oc1ccc(N=Nc2ccc(cc2)N(=O)=O)c(O)c1        | 0 |   |   |
| BrC1=C(Br)C(=O)OC1                        | 1 |   |   |
| CC(=O)O[C@@H]1C[C@H]2CC[C@]1(C)C2(C)C     |   |   | 0 |
| O[C@H]1[C@                                | 0 | 0 |   |
| C1COCCOCCOCCO1                            | 0 |   |   |
| [O-][N+](=O)c1ccc(s1)C2NC(=O)c3ccccc      | 1 |   |   |
| Oc1c(Cl)cccc1Cl                           | 0 |   | 0 |
| CO[C@]12[C@H]3N[C@H]3CN1C4=C([C@H]2COC(=O |   |   | 0 |
| Cn1c(CC(=O)OCCCl)c(C(=O)O)c2ccccc12       | 1 |   |   |
| NCCS                                      | 0 | 0 | 0 |
| FC(F)OC(Cl)C                              | 0 | 0 | 0 |
| CN(C)CCCN=C1c2ccccc2Nc3cc(ccc13)N(-       | 1 |   |   |
| OC(=O)C(F)(F)C(F)(Cl)C(F)(F)C(F)(Cl)C(F   | 0 |   |   |
| COc1cc(N)c(cc1N)[N+](=O)[O-]              | 1 |   |   |
| C[C@H](Oc1                                | 0 | 0 |   |
| COc1ccccc1N=Nc2c(O)ccc3ccccc23            | 1 |   |   |
| CC(=O)C1CCCCC1=O                          |   |   | 0 |
| OC1C(O)c2ccc(c3c4ccccc4c5cccc1c5c23)      | 1 |   |   |
| [O-][N+](=O)c1ccc2N(S\C(=N/C(=O)CCC       | 1 |   |   |
| OCCSC1=C(S                                | 0 | 0 |   |
| [O-][N+](=O)c1cnc(s1)N2CCCC2=O            | 1 |   |   |
| CCCCCCC(=O)c1ccccc1                       |   |   | 0 |
| CN(C)S(=O)(=O)N(SC(F)(Cl)Cl)c1ccc(C)cc1   |   |   | 1 |

|                                            |   |   |   |   |   |
|--------------------------------------------|---|---|---|---|---|
| Fc1ccc2c3c(ccc4cccc34)c5cccc1c25           |   |   | 1 |   |   |
| CN1C[C@H](C=C2[C@@H]                       | 0 |   |   |   |   |
| CCOC(=O)C(Br)c1cccc1                       |   |   |   | 0 |   |
| Oc1cccc(\C=N\c2snc3cccc23)c1               |   |   | 1 |   |   |
| Oc1cccc1C(=O)c2cccc2O                      |   |   |   | 1 |   |
| CNC(C)C(O)c1cccc1                          |   |   | 0 |   | 0 |
| NC\C=C\C(=C                                | 0 | 0 |   | 0 |   |
| Nc1ncnc2c1ncn2C[C@H](O)CN=[N+]=[N          |   |   | 1 |   |   |
| O=C(C1CCCC                                 | 0 | 0 | 0 | 0 |   |
| CC1CCCO1                                   |   |   | 0 |   |   |
| CC(=O)Oc1cc                                | 0 | 0 |   | 0 |   |
| OCCN1CCN(CC1)C(=O)CN2C(=O)Sc3ccc(Cl)cc23   |   |   |   | 0 |   |
| FC(F)(F)c1cccc(c1)N(=O)=O                  |   |   | 0 | 0 |   |
| COC1=C(Oc2ccc(OC)cc2C1:                    | 0 |   |   |   |   |
| CC1(C)S[C@H]2[C@H](NC                      | 0 |   |   |   |   |
| CCCCCCCCC                                  | 0 | 0 |   | 0 |   |
| CN(N=O)[C@H](OC(=O)C)c1cccc1               |   |   | 1 |   |   |
| CCC1(CCC(=C                                | 0 | 0 |   | 0 |   |
| NOCC(=O)O                                  | 0 | 0 |   |   |   |
| CC(Br)Br                                   |   |   | 0 |   |   |
| CC1=CCCc2c1cc(C)c3c2ccc4cccc34             |   |   | 1 |   |   |
| CCCCCCCCC                                  | 1 | 0 |   | 1 |   |
| Oc1cccc2C(=O)c3c(O)cccc3C(=O)c12           |   |   | 1 |   |   |
| CC(C)(C)CBr                                |   |   | 0 |   |   |
| Fc1cccc1C(=O)Cl                            |   |   | 1 | 0 |   |
| CC(C)[C@H]1CC=C(C)C=C1                     |   |   |   | 0 |   |
| O=C1Nc2ccc                                 | 0 | 0 |   |   |   |
| Cc1ccc(cc1)c2nn(CC(C)(C)C                  |   | 1 |   |   |   |
| OC(=O)CS                                   |   |   | 0 | 0 |   |
| OC(=O)C1=C                                 | 0 | 0 |   |   |   |
| [O-][N+](=O)c1ccnc2cccc12                  |   |   | 1 |   |   |
| CC(=O)N1CCN(CC1)c2ccc(C                    |   | 1 |   |   | 1 |
| CC(=O)Nc1ccc(Cc2ccc(NC(=O)C)cc2)cc1        |   |   | 0 |   |   |
| Oc1ccc(\C=C\c2ccc(\C=C\c                   |   | 0 |   |   |   |
| CCN1C(=CC=CC=Cc2sc3cccc3[n+])2CC)Sc4cccc14 |   |   |   | 1 |   |
| CCCC(C)C                                   |   |   |   | 0 |   |
| Cc1nc(cc2c3cc(cc(c3[nH]c12)[N+](=O)[C      |   |   | 1 |   |   |
| OC[C@H]1O[C@H]([C@H]                       | 0 |   |   |   |   |
| Cc1cccc(C)c1                               | 0 | 0 |   | 0 |   |
| CCC1(O)CC2CN(Cc3c([nH]                     |   | 1 |   |   |   |
| CC1(C)O[C@                                 | 0 | 0 |   |   |   |
| O=N(=O)c1cccc2cccnc12                      |   |   | 1 | 0 |   |
| CCNc1nc(Cl)nc(NC(C)C)n1                    |   |   | 0 | 0 |   |

|                                               |   |   |   |
|-----------------------------------------------|---|---|---|
| CCOc1ccc(O)cc1                                |   |   | 0 |
| CC(C)(c1cc(Cl)c(O)c(Cl)c1)c2cc(Cl)c(O)c(Cl)c2 |   |   | 1 |
| COc1ccc2nc(N)s2c1                             | 1 |   | 0 |
| CC(Br)c1ccccc1                                | 0 |   |   |
| CCCCOC(=O)CC(O)(C(C=O)                        | 0 |   |   |
| CC(C)OC(=O)C                                  | 0 |   | 0 |
| CCOc1cc(NC(                                   | 0 | 0 | 0 |
| CC(=CCC\C=C/CCC(C)(O)C=C)\C                   |   |   | 0 |
| CC(=O)OCCCCCCCCC=C                            |   |   | 0 |
| OC(=O)C(Cc1c[nH]c2ccccc12)NC(=O)CO            | 0 |   |   |
| CCNC(=O)C1CC(C)CCC1C(C)C                      |   |   | 0 |
| CC1(C)C2CCC1(C)C(C)(O)C2                      | 0 |   |   |
| Oc1nnc(O)c2ccccc12                            | 0 |   |   |
| CCc1ccccc1N                                   | 0 |   |   |
| Oc1ccc2cccnc2c1                               | 0 |   |   |
| C[n+]1ccn(Cc2ccccc2)c1                        |   |   | 0 |
| CCCCC1ccc(Cl)cc1                              |   |   | 0 |
| CNCCCN1c2ccccc2CCc3ccc                        | 1 | 0 |   |
| CC(=O)N[C@@H](CC(=O)N[C@@H](CCC(=O)O)C(=O)    |   |   | 0 |
| OC1CC23OC2(C1)C=CC=C3                         | 0 |   |   |
| CC(C)COC(=O)C=Cc1oc(cc1)N(=O)=O               | 1 |   |   |
| Clc1nsc2cc(ccc12)N(=O)=O                      | 1 |   |   |
| CN(C(=O)CCCCl)c1snc2ccccc12                   | 0 |   |   |
| N[C@H](C(=O)O)c1ccc(C(=                       | 0 |   |   |
| CC(=O)Nc1ccc(Cc2ccc(NC(=O)C)c(Cl)c2)          | 1 |   |   |
| OC(CN=N#N)CN1C=CC(=O)NC1=O                    | 1 |   |   |
| OS(=O)(=O)c1cc(Nc2ccc(cc2[N+](=O)[O           | 1 |   |   |
| CN(C)c1ccc(\C=C\2/C(=O)I                      | 0 |   |   |
| Nc1ccc(NC(=O)c2ccc(cc2)C(=O)O)cc1             | 0 |   |   |
| O=C(OCCOCCOCCOC(=O)c1ccccc1)c2ccccc2          |   |   | 0 |
| C1Cc2cc3ccc4cccc5ccc(c2C6OC16)c3c45           | 1 |   |   |
| Cc1ccc(c(C)c1)S(=O)(=O)[O-]                   |   |   | 0 |
| OCCN(CCO)c1ccc(cc1)N=Nc2cccnc2                | 0 |   |   |
| Cc1ccc(OP(=O)(Oc2ccccc2)Oc3ccccc3)cc1         |   |   | 1 |
| CC\C=C/c1c                                    | 1 | 1 |   |
| Nc1ccc(Cc2ccc(N)cc2N(=O)=O)c(c1)N(=           | 1 |   |   |
| O=C1O[C@@                                     | 0 | 0 |   |
| C[C@H]1C[C@H]2[C@@H]3CCC4=CC(=O)C=C[C@]4(C    |   |   | 0 |
| CCCCc1ncc(\                                   | 0 | 0 |   |
| COc1ccc2CC3                                   | 1 | 1 |   |
| C[N+](C)(C)C                                  | 0 | 0 | 0 |
| CCCCCOC(=O)CC                                 |   |   | 0 |
| COC(=O)c1occ(c2ccccc2)c1c3ccccc3              | 0 |   |   |

|                                             |   |   |   |
|---------------------------------------------|---|---|---|
| COc1cccc2C(=O)c3c(O)c4C[C@](O)(C[C(         | 1 |   |   |
| OCc1ccc[n+](                                | 0 | 0 | 0 |
| Nc1cccc1                                    |   |   | 0 |
| CN1CCC(=C2c                                 | 1 | 1 | 0 |
| C=COc1ccc(cc1)N(=O)=O                       |   |   | 1 |
| C(C(C1CCCC                                  | 1 | 1 | 1 |
| Nc1ccc2ncccc2c1                             |   |   | 0 |
| CC(C)CCC(=O)CCC(C)C                         |   |   | 0 |
| CCOCCOC(=O)C                                |   |   | 1 |
| Cc1cc(c(C)cc1O)C2(OS(=O))(=O)c3cccc2        |   |   | 0 |
| BrC1ccc(cc1)N(=O)=O                         |   |   | 1 |
| Fc1cccc2c1ccc3ncccc23                       |   |   | 1 |
| O[N+](=C)[O-]                               |   |   | 0 |
| CN1CCC=C(C1)C(=O)OCC#(                      |   | 0 |   |
| CCCCC(CC)COC(=O)CCCC(=O)OCc1cccc1           |   |   | 0 |
| Clc1ccc(cc1)S(=O)(=O)NC(=O)NN2CCCC2         |   |   | 0 |
| CC1=CC(=O)N                                 | 0 | 0 |   |
| ClC(Cl)[C@H](c1ccc(Cl)cc1)c2cccc2Cl         |   |   | 0 |
| Nc1ncnc2c1ncn2CC(O)CN=[N+]=[N-]             |   |   | 1 |
| C1CC[C@H](NC1)c2cccnc2                      |   | 0 | 0 |
| Cc1cc(c(C)c2c3cc(O)ccc3[nH]c12)N(=O):       |   |   | 1 |
| OCCc1ccncc1                                 |   |   | 0 |
| CCOC(=O)CCCCCCCC=C                          |   |   | 0 |
| CCCC(=O)OCc1ccc(cc1)[N+](=O)[O-]            |   |   | 1 |
| C[C@H]1CCCC(=O)CCCC=Cc2cc(O)cc(O)c2C(=O)O1  |   |   | 1 |
| COc1cc(O)c(                                 | 0 |   | 0 |
| N[C@@H](CN1C=CC(=O)N                        |   | 0 |   |
| CCC1OC(=O)(                                 | 0 | 0 |   |
| CC(N\C(=N)/C                                | 0 | 0 | 0 |
| CC1(C)S[C@                                  | 0 | 0 |   |
| CN1CCN(CC1                                  | 0 | 0 |   |
| C1Cc2ccc3cccnc3c2C4OC14                     |   |   | 1 |
| C\C\1=C\C[C[                                | 0 | 0 |   |
| Cl\C(=C/n1cr                                | 0 | 0 | 0 |
| CCC(CCC(=O)C)COC(=O)c1cccc1C(=O)O           |   |   | 0 |
| CC(C)(CO)[C                                 | 0 | 0 | 0 |
| CCCCCBr                                     |   |   | 0 |
| Cc1cccc(O)c1                                |   |   | 0 |
| CC(=C)[C@H]1CCC(=CC1)C                      |   |   | 0 |
| Nc1ccc2c(ccc3c4cccc4ccc23)c1                |   |   | 1 |
| CCCCOC(=O)c1cccc2cccnc12                    |   |   | 0 |
| CN1[C@@H]                                   | 0 | 0 |   |
| CN1[C@@H]2CCC[C@H]1CC(C2)NC(=O)c3nn(C)c4ccc |   |   | 0 |



|                                                |   |   |
|------------------------------------------------|---|---|
| CCN(N=O)c1ccccc1                               | 0 |   |
| CC(=O)Nc1nc(cs1)c2cc(cs2)[N+](=O)[O-           | 1 |   |
| CCCN1CC[C@H]2[C@@H]:                           | 0 |   |
| O=NN1CCCC1                                     | 1 | 0 |
| COC(=O)[C@]12O[C@@]1(C)[C@@](C)                | 1 |   |
| COCN(COC)c1nc(nc(n1)N(COC)COC)N(COC)COC        |   | 0 |
| Oc1cccc(c1)C(=O)c2ccccc2                       |   | 1 |
| OC1=C(C(=O)C2CC2)C(=O)                         | 0 |   |
| CSc1cnc(C)cn1                                  |   | 0 |
| COC(=O)Nc1nc2cc(ccc2[nH]1)\C(=N\O)             | 1 |   |
| C[C@]12C(C                                     | 0 | 0 |
| CC12CCCC(C)(C1CCC34CC(O)(CCC23)C5(             | 0 |   |
| CCCCC(CC)COC(=O)C=Cc1ccc(OC)cc1                | 0 | 0 |
| COCCOCCO                                       | 0 | 0 |
| CC12CCCC=C1C(=O)OC2=O                          |   | 0 |
| CSCNc1ccccc1                                   | 1 |   |
| O=N(=O)c1ccc2c(CCc3cc4c(CCc5ccccc45            | 1 |   |
| CN(C)\C=N\c1ccc(Cl)cc1C                        | 0 | 0 |
| ClCC=O                                         | 1 | 0 |
| O[C@@H]1C=Cc2c(ccc3cc4ccccc4cc23)[             | 1 |   |
| CC(C)(O)C1Cc2cc3C=CC(=O)Oc3cc2O1               | 1 |   |
| Oc1cc2OC(=CC(=O)c2c(O)                         | 0 |   |
| Cc1onc(c2ccccc2)c1C(=O)N[C@H]3[C@H]4SC(C)(C)[C |   | 0 |
| Oc1ccc2ccc3c4ccccc4cc5ccc1c2c35                | 1 |   |
| CCOC(=O)N1CCC(=C2c3ccc                         | 1 |   |
| COc1ccc2c(ccc3c4CC=C(C)c4ccc23)c1              | 1 |   |
| COc1cc2C=CC(=O)Oc2c(O)                         | 0 |   |
| CC(Oc1ccccc1)C(=O)N[C@H]2[C@H]3SC(C)(C)[C@@H   |   | 0 |
| Clc1ccc(cc1)N2CCN(Cc3cc                        | 0 |   |
| N[C@@H](CCCNC(=S)N)C(                          | 0 |   |
| CC(=O)OCC(=                                    | 0 | 0 |
| [O-]C1=NC(=O)N(Cl)C(=O)N1Cl                    |   | 0 |
| Fc1cc2ccccc2c3ncccc13                          | 1 |   |
| C[N+]1(C)CC                                    | 0 | 0 |
| OCc1oc(cc1)C(=O)NCC(=O)O                       |   | 0 |
| CC(=O)c1ccc2ccc3ccccc3c2c1                     |   | 1 |
| NC(=O)c1ccc[n+](c1)[C@                         | 0 |   |
| CCCCOc1cc2C(=O)CCc2c3ccc4ccccc4c13             | 0 |   |
| COC(=O)C1=C(C)NC(=C(C1c2ccccc2)N(=O)=O)C(=O)C  |   | 1 |
| COc1ccc(cc1N(=O)=O)N(=O)=O                     | 1 | 0 |
| COC(=C1C(C(=C(C)N=C1C)C(=O)OC)c2cc             | 0 |   |
| C[C@@H]1O[C@@H](O[C                            | 0 |   |
| Oc1c2ccccc2c(O)c3c1ccc4nc5c6C(=O)c7            | 0 |   |

|                                           |   |   |
|-------------------------------------------|---|---|
| CN(C)c1ccc(cc1)N(C)C                      | 1 | 0 |
| O=NN(Cc1ccccc1)Cc2ccccc2                  | 0 |   |
| C\C(=C/c1ccc                              | 0 | 0 |
| CNC(=O)OCC[N+](C)(C)C                     | 0 | 0 |
| CCCOc1ccccc                               | 0 | 0 |
| CCCCCCCCCCCC[N+](C)(C)C                   |   | 0 |
| CCCCCCCC\C=C/CCCCCCCCO                    |   | 0 |
| CCCCCCCCCOC(=O)C                          |   | 0 |
| CCOC(=O)c1ncn2c1[C@@H]                    | 0 |   |
| CSCCC(NC(=O)C(N)Cc1c[nH]c2ccccc12)C       | 0 |   |
| Cc1ccccc1(OC(=O)C2c3ccccc2)Oc3ccccc3)c    | 0 |   |
| Nc1ccccc1c2ccccc2                         | 1 | 0 |
| C1CN=C(N1)C2CC2(c3ccccc3)c4ccccc4         |   | 0 |
| CCc1cc(N)cc(C)c1Cc2c(C)cc(N)cc2CC         | 0 |   |
| CCCCCCCC\C=C/CCCCCCCC(                    | 0 |   |
| CN(C)CCNC(=O)c1ccc2nc3ccccc3c(N)c2c       | 0 |   |
| CCCCCCCC(=O)OC                            |   | 0 |
| COC(=O)c1cc(Cc2ccc(N)c(c2)C(=O)OC)cc      | 1 |   |
| NC(=O)NNc1                                | 0 | 0 |
| CCCOc(=O)C                                |   | 0 |
| CCCCCc1occc1                              |   | 1 |
| CC(=C)[C@@H]1[C@H]2O                      | 0 |   |
| Oc1ccc(\C=C                               | 1 |   |
| Oc1ccc(NC2=                               | 0 | 0 |
| Oc1cc(nc2nc(Cl)ccc12)c3cc                 | 0 |   |
| CCN(CC)S(=O)(=O)c1ccc(N)cc1               | 0 |   |
| CO[C@@H](C)[C@](O)(C(=O)OCC1=CCN          | 1 |   |
| ClCC(=O)Nc1snc2ccccc12                    | 1 |   |
| Oc1ccc(C=O)cc1                            | 0 |   |
| CCOC(=O)CC(C)O                            | 0 |   |
| [O-]c1c(Cl)cc(Cl)cc1Sc2cc(Cl)cc(Cl)c2[O-] |   | 1 |
| CC(C)NC[C@H]                              | 0 | 0 |
| C\C(=C/C=C/C(=C/C(=O)O)                   | 0 |   |
| CCC1CCC(=O)O1                             |   | 0 |
| CC(C)Cn1cnc:                              | 0 | 0 |
| COc1cc(O)c2c(O)c3c(O)cc(C)cc3cc2c1        | 1 |   |
| CC(C)(C)c1cc(CC(C)(C)CO)c                 | 0 |   |
| CC(=O)N[C@@H]1[C@@H](NC(=N)N)C=C(O[C@H]1[ |   | 0 |
| c1ccc2cnccc2c1                            | 0 | 0 |
| CCN(CC)CCN(                               | 0 | 0 |
| C1N(\N=C\c2ccc(Oc3ccccc3)cc2)N=Nc4        | 0 |   |
| CC1C=C[C-]=C1                             |   | 0 |
| [O-][N+](=O)c1oc(cc1)c2csc(NNC(=O)n2      | 1 |   |

|                                               |   |   |   |
|-----------------------------------------------|---|---|---|
| [O-][N+](=O)                                  | 0 |   |   |
| COc1ccc(\C=C\C(=O)c2ccccc2)cc1                | 0 |   |   |
| ClC1=C(Cl)C2(Cl)[C@H]3C4C[C@H](C=C4)[C@H]3[C@ |   | 1 |   |
| CN1CC[C@]23[C@H]4Oc5c(O)ccc(C[C@@H]1[C@@H]    |   | 0 |   |
| Fc1cnc2ccccc2c1                               | 0 |   |   |
| O=Cc1cccc(c1)c2ccccc2                         | 0 |   |   |
| Cn1cnc2c(N)ncnc12                             | 1 |   |   |
| CC(=O)C=C                                     | 1 | 0 |   |
| Nc1cc(CCO)c(N)c(c1)[N+](=O)[O-]               | 1 |   |   |
| CNC(=O)N(C)c1nc2ccccc2s1                      | 0 | 0 |   |
| OC[C@H]1OC(=O)[C@H](O)[C@@H](O)[C@@H]1O       |   | 0 |   |
| CC(Br)(CCl)CBr                                | 0 |   |   |
| CCN(CC)CCn1nc2ccc(C)c3c4ccc(Cl)cc4Sc          | 1 |   |   |
| OC[C@H](O)[C@H]1OC(=C(O)C1=O)O                | 0 |   |   |
| Cc1ccc(NO)cc1[N+](=O)[O-]                     | 0 |   |   |
| O=N(=O)c1ccc(C=Cc2ccc(cc2)N(=O)=O)c           | 1 |   |   |
| OC1=NC(=O)c2cc(ccc12)N(=O)=O                  | 1 |   |   |
| CCN(CC)c1ccc2C(=C3C=CC(=[N+](CC)CC)           | 0 |   |   |
| NC(=O)C=C                                     | 0 | 0 |   |
| NC(=O)C[C@H]1CO1                              | 1 |   |   |
| CCCCC(CC)C(=O)OCCOCCOCCOC(=O)C(CC)CCCC        |   | 0 |   |
| ON(C=O)c1ccc(cc1)[N+](=O)[O-]                 | 1 |   |   |
| Oc1c(Cl)cc(Cl)cc1Sc2cc(Cl)                    | 0 | 0 | 1 |
| [O-][N+](=O)c1cc(ccc1F)N=N#N                  | 1 |   |   |
| ClCCOP(OCCCl)OCCCl                            | 1 | 0 |   |
| OC[C@@H]1SCCN1N=O                             | 1 |   |   |
| CCC(C)(C)C1CCC(=O)CC1                         |   | 0 |   |
| CC(=O)CC(=O)Nc1ccc(O)cc1                      | 0 |   |   |
| [O-][N+](=O)c1cccc(c1)C(=O)ON(OCCc            | 1 |   |   |
| Nn1nnc2cccc                                   | 0 | 0 |   |
| CCC1CN2CCC1CC2C(O)c3cc                        | 0 |   |   |
| Nc1nc(nc2c1ncn2c3ccc(cc3)N(=O)=O)c4           | 1 |   |   |
| CC(=CCC\C(=C\C=C\C(=C\C                       | 0 | 0 |   |
| C[C@H]1[C@H](NC(=O)\C                         | 0 |   |   |
| CC1CC2OC3C(O)C(OC(=O)C)C(C)(C34CO             | 0 |   |   |
| c1cc2ccc3ccc4ccc5ccc6ccc1c7c6c5c4c3c          | 1 |   |   |
| O=C(NCN1CC                                    | 0 | 0 | 0 |
| Cc1cc2c(C)c3ccccc3c(C)c2cc1C                  | 1 |   |   |
| CCCN(C[C@H](O)CCO)N=O                         | 1 |   |   |
| Cc1cccc(OP(=O)(Oc2cccc(C)c2)Oc3cccc(          | 0 |   |   |
| OC[C@H](O)[C@@H](O)[C@H](O)C(=O)CO            |   | 0 |   |
| Cc1cccc2c1cc3ccc4cccc5ccc2c3c45               | 1 |   |   |
| CCc1c(O)ccc2c3CCOC(CC)(CC(=O)O)c3[n           | 1 |   |   |

|                                              |   |   |   |   |
|----------------------------------------------|---|---|---|---|
| CCCCCCCCO                                    |   |   | 0 | 0 |
| N[C@H](Cc1ccc(F)cc1)C(=O)O                   |   |   | 0 |   |
| COc1ccccc1C                                  | 0 | 0 |   | 0 |
| CNCC(=O)O                                    |   |   | 0 |   |
| CCC(=O)Nc1c                                  | 0 | 0 |   | 0 |
| CCOc1nc2cccc(C(=O)OC(C)OC(=O)OC3CCCC3)c2n1Cc |   |   |   | 1 |
| CN(C)c1nc(nc                                 | 0 | 0 | 0 | 0 |
| ONc1ccc(cc1)N=O                              |   |   | 1 |   |
| O=N(=O)c1ccc2nc3ccccc3nc2c1                  |   |   | 1 |   |
| Cc1cc(Cl)ccc1N                               |   |   |   | 0 |
| C=Cc1ccccc1                                  |   |   | 1 | 0 |
| CN1[C@H]2CC(C[C@@H]1[C@H]3O[C@@H]23)OC(=     |   |   |   | 0 |
| CCCCCCCCC(=O)OC(CC=C                         | 0 |   |   |   |
| C[C@@H](O)[C@@H]1[C(                         | 0 |   |   |   |
| Clc1cc(Cl)c(c(Cl)c1)N(=O)=O                  |   |   |   | 0 |
| Nc1ccc(F)cc1                                 |   |   | 1 |   |
| CCOC(=O)CCCCC\C=C/C\C=C/C\C=C/C              |   |   | 1 |   |
| CCC(C)(C)OC                                  |   |   | 0 | 0 |
| CCOC(=O)c1c(CCC)c(C=C                        |   | 1 |   |   |
| CC[C@H](NC                                   | 0 | 0 |   |   |
| CCCC#N                                       |   |   | 0 | 0 |
| CC1(C)CC2C=C(C=O)C3(CC3(C)C2C1)C=O           |   |   | 1 |   |
| CS(=O)(=O)c:                                 | 0 |   |   | 0 |
| OC(=O)c1cccc(Cl)c1                           |   |   | 0 |   |
| NCC(=O)Nc1ccccc1                             |   |   | 1 |   |
| Clc1ccc(NS(=O)(=O)c2cccc3ccnc23)cc1          |   |   | 0 |   |
| CCOC(=O)OC(C1CC2CCN1C                        | 0 |   | 0 |   |
| OCC1OC(CC1O)N2C=C(C(=O)NC2=O)C(F             |   |   | 1 |   |
| ClC1=C(Cl)C(=O)c2ccccc2C1=O                  |   |   | 1 | 1 |
| CC\C=C\C\C=C\C\C=C\C\CCCCCCC(=O)O            |   |   | 0 |   |
| c1ccc2c(c1)[nH]c3cnccc23                     |   |   | 1 | 0 |
| CC(=O)Nc1nc2c3ccnc3cc(C)c2n1C                |   |   | 1 |   |
| CC1OC(OC2C(O)C(O)C(CO)OC2OC34CCC             |   |   | 0 |   |
| C\C=C(/C)\C(=O)C                             |   |   |   | 0 |
| C[NH+](C)CCC(c1ccc(Cl)cc1)c2cccn2            |   |   |   | 0 |
| Cc1ccccc1O                                   |   |   | 0 | 0 |
| CCCC[C@H](CC)COC(=O)C(=C(c1ccccc             |   |   | 0 |   |
| CC[N+](CC)(C                                 | 0 | 0 |   |   |
| CC(O)CN(CC(=O)C)N=O                          |   |   | 1 |   |
| O=C1CC2OCC                                   | 0 | 0 |   |   |
| CN(C)CC\C=C                                  | 0 | 0 |   |   |
| O=C1Nc2cc3ccccc3c4c5OCOc5cc1c24              |   |   | 1 |   |
| FC(F)(F)COC(                                 | 0 | 0 |   | 0 |

|                                                            |   |   |   |
|------------------------------------------------------------|---|---|---|
| <chem>COc1ccc(C(=O)c2ccccc(O)c2)c(OC)c1</chem>             |   |   | 1 |
| <chem>CC(C)(C)c1ccc1</chem>                                | 1 | 0 |   |
| <chem>CC=O</chem>                                          |   | 0 | 1 |
| <chem>CC(C)CC(N(C)</chem>                                  | 0 | 0 | 0 |
| <chem>C(C1COc2ccc</chem>                                   | 0 | 0 | 0 |
| <chem>CC(C)COS(=O)(=O)c1ccc(C)cc1</chem>                   |   | 0 |   |
| <chem>[O-][S+](=O)(c1ccc(NC(=O</chem>                      |   | 0 |   |
| <chem>OCc1c2ccccc2cc3ccccc13</chem>                        |   | 1 | 1 |
| <chem>CC(C)C1CCC(O)CC1</chem>                              |   |   | 0 |
| <chem>O=C1CCc2c1ccc3c2ccc4ccccc34</chem>                   |   | 1 |   |
| <chem>CC(C)COP(=S)(OCC(C)C)SCCl</chem>                     |   | 0 |   |
| <chem>Oc1c(Cl)cc(Cl)cc1Cl</chem>                           |   | 0 | 1 |
| <chem>C[C@]12CC[C@H]3[C@@H](CCc4cc(O)ccc34)[C@@H</chem>    |   |   | 0 |
| <chem>BrC1ccc(Oc2ccc(Br)cc2)cc1</chem>                     |   |   | 1 |
| <chem>COc1cccc(OC)c1</chem>                                |   |   | 0 |
| <chem>CC(C)COC(=O)c1ccc(O)cc1</chem>                       |   |   | 1 |
| <chem>COC(=O)C(CSCCBr)NC(=O)C</chem>                       |   | 1 |   |
| <chem>OCC(CO)NC1CC(O)(CO)C(O)C(O)C1O</chem>                |   | 0 |   |
| <chem>CCOc1ccc2nc(N)sc2c1</chem>                           |   | 1 |   |
| <chem>CCC(C)N1N=CN(C1=O)c2ccc(cc2)N3CCN(CC3)c4ccc(O</chem> |   |   | 0 |
| <chem>BrC1ccc(\C=C\C(=O)c2ccccc2)cc1</chem>                |   | 0 |   |
| <chem>Cc1c(\C=N\OCc2ccc(Cl)cc2Cl)c3cc(ccc3r</chem>         |   | 0 |   |
| <chem>CCC(C)OS(=O)(=O)C</chem>                             |   | 1 |   |
| <chem>ONc1ccccc1c2ccccc2</chem>                            |   | 1 |   |
| <chem>CO[C@H]1[C</chem>                                    | 0 | 1 |   |
| <chem>CCOC(=O)NNc1ccc(nn1)N(CC)CC(C)O</chem>               |   |   | 0 |
| <chem>CCOC(=O)N(CCCC(=O)c1cccn1)N=O</chem>                 |   | 1 |   |
| <chem>O[C@H](C#N)c1ccccc1</chem>                           |   | 0 |   |
| <chem>OS(=O)(=O)c1ccc2cc(Oc3ccc4cc(ccc4c3)</chem>          |   | 0 |   |
| <chem>NCCCC[C@H](N[C@@H](CCc1ccccc1)C(</chem>              |   | 0 | 0 |
| <chem>CC(=O)OCC1=</chem>                                   | 0 | 0 |   |
| <chem>COc1ccc(OC)c(CC(C)N)c1</chem>                        |   |   | 0 |
| <chem>CC(O)C(=O)[O-]</chem>                                |   |   | 0 |
| <chem>COc1cc2C[C@@](C)(O)[C@H](C)Cc3cc4OCOc4c(OC)c</chem>  |   |   | 0 |
| <chem>O=C(Oc1cccc</chem>                                   | 0 | 0 |   |
| <chem>Cc1ccc2ccc(cc2c1)[N+](=O)[O-]</chem>                 |   | 1 |   |
| <chem>O=C1C(=O)c2ccccc2c3ccccc13</chem>                    |   | 0 |   |
| <chem>Fc1ccc2ccc3cccn3c2c1</chem>                          |   | 1 |   |
| <chem>CC(C)COC(=O)c1ccccc1C(=O)OCC(C)C</chem>              |   | 0 | 0 |
| <chem>C[C@]12CC[C@H]3[C@@H](CC=C4C[C@</chem>               |   | 1 |   |
| <chem>N[C@@H](C(=O)O)c1ccc(</chem>                         |   | 0 |   |
| <chem>CCC(C)(C)CC</chem>                                   |   |   | 0 |
| <chem>O=C(OCC1ccc(cc1)N(=O)=O)c2ccccc2</chem>              |   | 1 |   |

|                                             |   |   |   |   |   |
|---------------------------------------------|---|---|---|---|---|
| C[C@H](NC(C)(C)C(=O)c                       | 0 |   |   |   |   |
| CN1C(=O)\C(                                 | 0 | 0 |   |   |   |
| OC(CC(=O)OCCBr)(CC(=O)OCCBr)C(=O)C          |   |   | 1 |   |   |
| OCC=N(=O)O                                  |   |   | 1 |   |   |
| COc1ccc(CC(I                                | 0 | 0 |   |   |   |
| ClCCOC\C(=C/Cl)\Cl                          |   |   | 1 |   |   |
| COC(=O)CCC(C)C1CCC2C3[                      |   | 0 |   |   |   |
| ON=C                                        |   |   | 0 |   |   |
| CCOC(=O)CCCCCCCC(=O)OCC                     |   |   |   | 0 |   |
| CC1=CCC2CC:                                 | 0 | 0 | 0 | 0 |   |
| CC(C)C(=O)Nc1ccc(c(c1)C(F)(F)F)N(=O)=O      |   |   |   | 1 | 1 |
| OCc1ccc(Br)cc1                              |   |   | 0 |   |   |
| ClC1=CC(=O)C(Cl)(Cl)C1=O                    |   |   | 1 |   |   |
| [O-][N+](=O)c1oc\C=C/c2csc(NC=O)n2          |   |   | 1 |   |   |
| C1Nc2cc[n+](Cc3cccc(C[n+                    |   | 0 |   |   |   |
| CN(C)CCOC(=                                 | 0 | 1 |   | 0 |   |
| CN(C)CCc1c[nH]c2cccc12                      |   |   |   | 0 |   |
| Oc1ccc(Sc2ccc(O)cc2)cc1                     |   |   |   | 1 |   |
| C[C@@H](O)[C@@H](N)[C@H](O)[C@              | 0 |   |   |   |   |
| Nc1ccc(Oc2ccc(N)cc2)cc1                     |   |   | 1 | 0 |   |
| c1ccc2c(c1)ccc3c4ccncc4ccc23                |   |   | 1 |   |   |
| CC(=O)Nc1ccc(Nc2ccc(cc2)[N+](=O)[O-]        |   |   | 1 |   |   |
| Nc1ccc(cc1)c2ccc(N)c(c2)N(=O)=O             |   |   | 1 |   |   |
| CC[C@]1(O)C(                                | 0 | 1 |   |   |   |
| [O-][N+](=O)c1cccc\C=N\c2snc3cccc2          |   |   | 1 |   |   |
| COc1ccc2C(C                                 |   | 1 |   |   |   |
| CC(C)CCCC(C)C\C=C\C(=C(=O)OCC#C)\C          |   |   |   | 0 |   |
| CC\C=C(/C(=O)N[C@H]1[C@H]2SCC(=C(N2C1=O)C(= |   |   |   | 0 |   |
| COc1cc\C=C\C(=O)O[C@H]2CC[C@]34C[C@]35CC[C@ |   |   |   | 0 |   |
| NC(=O)c1ncn([C@@H]2O[C@H](CO)[C@@H](O)[C@   |   |   |   | 0 |   |
| [O-][N+](=O)c1cccc2cn[n-                    |   | 0 |   |   |   |
| Cc1cncc(C)n1                                |   |   | 1 |   |   |
| Oc1ccc2Oc3cc(O)cc(O)c3C(=O)c2c1             |   |   | 1 |   |   |
| NC(=O)C1CCCN1C(=O)C(Cc2c[nH]cn2)N(          |   |   | 0 |   |   |
| CCCN1CCC[C@                                 | 0 | 0 |   |   |   |
| NC(COC(=O)C(                                | 0 | 0 | 1 |   |   |
| CCOC(=O)C=Cc1oc(cc1)N(=O)=O                 |   |   | 1 |   |   |
| NC1(CCCCC1)                                 | 0 | 0 |   |   |   |
| CC(=O)CC(=O)OCCOC(=O)C(=C)C                 |   |   |   | 0 |   |
| CCC1=CN([C@H]2C[C@H](O)[C@@H](CO)O2)C(=O)N  |   |   |   | 0 |   |
| C[C@H]1[C@@H]2CC[C@@]3(C)C=CC(=O)C(=C3[C@   |   |   |   | 0 |   |
| COC(=O)C1=C(                                | 0 | 0 |   |   |   |
| Clc1nncc2ncccc12                            |   |   | 0 |   |   |

|                                             |   |   |   |   |
|---------------------------------------------|---|---|---|---|
| Clc1ccc2[nH]c(nc2c1)c3ccc                   | 0 |   |   |   |
| Nc1ccnc2ccccc12                             |   |   | 0 |   |
| CCN1CCN(C(=O)N[C@@H](C(=O)N[C@H]2[C@H]3SC   |   |   |   | 0 |
| CC(N)Cc1c[nl                                | 1 | 1 |   |   |
| NC(=O)c1cnc                                 | 0 | 0 | 0 | 0 |
| CN(C)C(=S)S!                                | 0 | 0 | 1 | 1 |
| CC1CCC(=O)O1                                |   |   |   | 0 |
| ClCC(=O)Nc1snc2cc(Cl)ccc12                  |   |   | 1 |   |
| CCC(=O)C(=O)CC                              |   |   | 1 | 0 |
| CCC1(CC(=O)O)OCCc2c1n(C)c3ccccc23           |   |   | 0 |   |
| CN(C)S(=O)(=                                | 0 |   |   |   |
| CCCCCOC(=                                   | 0 | 0 |   | 0 |
| CC(=O)OC(C)(C)C1CCC(=CC1)C                  |   |   |   | 0 |
| CCOCCc1c(nc(N)n2ncnc12)c3ccccc3             |   |   | 0 |   |
| CC(C)(C)c1ccc(O)c(c1)C(C)(C)C               |   |   |   | 1 |
| ClCc1cccc(C=C)c1                            |   |   |   | 0 |
| CCCCCCCCCCCCCCCC1CO1                        |   |   | 0 | 0 |
| Nc1nc(cs1)\c                                | 0 | 0 |   |   |
| ONS(=O)(=O)c1cccc2cccnc12                   |   |   | 0 |   |
| CC(=O)O                                     |   |   | 0 | 0 |
| ONc1cc2ccccc2[nH]1                          |   |   | 1 |   |
| c1cnc2cnncc2c1                              |   |   | 0 |   |
| C[C@H]1C[C@H](OC(=O)C)O[C@H](C)C            |   |   | 1 |   |
| OCC=O                                       |   |   | 0 |   |
| NC(=O)CC[C@@H]1NC(=O)[C@H](Cc2ccccc2)NC(=O) |   |   |   | 0 |
| CN(C)C(=N)N                                 | 0 | 0 |   |   |
| OCCc1ccc(cc1)N(=O)=O                        |   |   | 1 |   |
| COc1cccc2C(                                 | 0 | 0 |   |   |
| CC(C)C(O)(c1ccc(OC(F)(F)F)cc1)c2cncnc2      |   |   |   | 0 |
| CN(C)CCOCCO                                 |   |   |   | 0 |
| COC(=O)C12CC1(C=O)C(=CC3CC(C)(C)CC          |   |   | 1 |   |
| CO\N=C\C(=                                  | 0 | 0 |   |   |
| OC(C1CCNCC1)(c2ccccc2)c                     |   |   | 0 | 0 |
| [O-][N+](=O)c1cc2NC(=O)                     |   | 0 |   |   |
| CN(N=O)C(=N)NN(O)O                          |   |   | 1 |   |
| [O-][N+](=O)c1ccc2[nH]cnc2c1                |   |   | 1 |   |
| BrCc1ccc2cccc3c4ccccc4c1c23                 |   |   | 1 |   |
| Oc1ccc2c(c1)c3cc4ccccc4c5cc6ccccc6c2        |   |   | 1 |   |
| [S-]c1nc2ccccc2s1                           |   |   |   | 1 |
| CCCC1(O)CCC2C3CCC4CC(=O)CC(C)C4(C)          |   |   | 0 |   |
| OC(=O)CCCC                                  | 0 | 0 |   | 0 |
| CN1CCc2cccc                                 | 1 | 0 |   |   |
| O=NN1CCSC1                                  |   |   | 1 |   |

|                                              |   |   |   |
|----------------------------------------------|---|---|---|
| OS(=O)(=O)Oc1cccc2c3ccc4cccc5ccc(cc:         | 0 |   |   |
| CN1CCc2c(C1                                  | 1 | 0 |   |
| COC12OOC1(C)Oc3cccc23                        |   |   | 1 |
| CC(=O)ON(OCc1ccc(Cl)cc1)C(=O)c2cccc          |   |   | 1 |
| [O-][N+](=O)c1cccc2c1ncc3cnc4cccc4c          |   |   | 1 |
| ON(C=O)c1cccc(Cl)c1                          |   |   | 0 |
| [O-]C(=O)CN                                  | 0 | 0 | 0 |
| CCCCCCCCCCCC1CO1                             |   |   | 0 |
| N[C@H](CO)C(=O)O                             |   | 0 | 0 |
| Nc1c([nH]c2cccc12)C(=O)N\N=C\c3ccc           |   |   | 0 |
| O=C1NC(=O)C(=N#N)C=N1                        |   |   | 1 |
| [O-][n+]1cccc1[S-]                           |   |   | 1 |
| CCC(NC(C)C)(                                 | 0 | 0 | 0 |
| NC(=O)c1sc2c(cc(cc2[n+]1                     |   | 0 |   |
| CCCCCN(N=O)C(=N)N[N+](=O)[O-]                |   |   | 1 |
| C[C@@H]1CC[C@H](CC1)C(C)(C)OO                |   |   | 1 |
| ClSC(Cl)(Cl)Cl                               |   |   | 1 |
| CCCC(C)C(=O)OCC                              |   |   | 0 |
| Cc1cnc(C)cn1                                 |   |   | 0 |
| C[N+]1([O-])                                 | 0 | 0 |   |
| Cc1cc(C)cc(O                                 | 0 | 0 | 0 |
| Cc1ccc(cc1)c2nc3SCCn3c2[N+](=O)[O-]          |   |   | 1 |
| COc1ccc2ncc                                  | 1 | 0 |   |
| CC(C)(C)OC(=NN=Cc1cn(=O)c2cccc2n1:           |   |   | 1 |
| CC1(OC(=O)N(C1=O)c2cc(Cl)cc(Cl)c2)C=C        |   |   | 0 |
| CC(C)(C)OOC(C)(C)c1cccc(c1)C(C)(C)OO(        |   |   | 0 |
| Nc1ccc(cc1)c2ccc(N)cc2[N+](=O)[O-]           |   |   | 1 |
| O\N=C\c1cccc[n+]1CCOCC#C                     |   |   | 0 |
| OC(=O)\C(=C(/Br)\C=O)\Br                     |   |   | 1 |
| CCOc1ccc2cccc2c1C(=O)N[C@H]3[C@H]4SC(C)(C)[C |   |   | 0 |
| [S-]C(=S)NCCNC(=S)[S-]                       |   |   | 0 |
| OC(=O)c1cccc1O                               |   |   | 0 |
| CCOC(=O)\C=C(/C)\C=CC[C@@H](C)CCCC(C)C       |   |   | 0 |
| CC(C)CN(N=O)C(=N)NN(O)O                      |   |   | 1 |
| Cc1cc(O)c2C(=O)c3c(O)cc(O)cc3C(=O)c2         |   |   | 1 |
| CSCCC=O                                      |   |   | 0 |
| CC(C)C(NC(=O)C)C(=O)N(CC(=O)O)N=O            |   |   | 1 |
| COC(=O)C1=C(C)NC(=C(C1c2cccc(Cl)c2C          |   |   | 0 |
| C[N+](C)(C)C                                 | 0 | 0 |   |
| CC1(C)CCCC2(C)C1CC=C(C=O)C2C=O               |   |   | 0 |
| OC(=O)CCC(=O)Nc1ccc(Cl)c(Cl)c1               |   |   | 0 |
| Cc1cccc1N2                                   | 0 | 0 |   |
| Oc1c(Br)c(Br)c(Br)c(Br)c1Br                  |   |   | 0 |
|                                              |   |   | 1 |



|                                            |   |   |   |   |
|--------------------------------------------|---|---|---|---|
| CC(C)Cc1ccc(                               | 0 | 0 | 0 | 0 |
| CN(C)c1ccc(cc1)C2CC3(C)C(CCC3(O)CCC(       |   |   | 0 |   |
| CC(C)c1ccc(C=O)cc1                         |   |   |   | 0 |
| [O-][N+](=O)C(Cl)(Cl)Cl                    |   |   | 1 |   |
| Cc1cccn2c1nc3c(C)c(N)cnc23                 |   |   | 1 |   |
| O=C1c2ccccc2c3cc(ccc13)N(=O)=O             |   |   | 1 |   |
| Fc1ccc(cc1)C                               | 1 | 1 |   | 0 |
| CC(=O)C1=C(O)C2C3C(Cc4ccccc5[nH]cc3c       |   |   | 1 |   |
| COc1ccc(cc1)n2nc(cc2c3ccc(cc3)S(=O)C)C(F)F |   |   |   | 0 |
| [O-]S(=O)(=O)C=C                           |   |   |   | 0 |
| CN(C)[C@H]:                                | 0 | 0 |   |   |
| Nc1cccc2ncc(F)cc12                         |   |   | 1 |   |
| Nc1ccc2ccc3cccc4ccc1c2c34                  |   |   | 1 |   |
| NC(CSc1ccc(cc1[N+](=O)[O-])[N+](=O)[       |   |   | 1 |   |
| c1ccc(cc1)P(c2ccccc2)c3ccccc3              |   |   | 0 |   |
| CC1OC(OCC2                                 | 0 | 0 |   |   |
| OC(=O)c1ccc                                | 0 | 0 |   | 0 |
| COc1cc(ccc1(                               | 0 | 0 |   | 0 |
| Clc1ccc2nn[nH]c2c1                         |   |   |   | 0 |
| Nc1nc2C3CCCN3CCc2s1                        |   |   | 0 |   |
| CC[C@]12CC(=C)[C@H]3[C                     |   | 0 |   | 1 |
| CC(C)(COP(=                                | 0 | 0 |   | 0 |
| OC(=O)CCC(=O)OCCOC(=O)C=C                  |   |   |   | 0 |
| Cc1ccc(O)c(c                               | 0 | 0 |   |   |
| CCN=[N+](C)[O-]                            |   |   | 0 |   |
| OC1C=Cc2c(C1O)c3ccc4ccccc4c3cc2N(=         |   |   | 1 |   |
| O=C1OC(=O)C2C3CC(C=C3)C12                  |   |   |   | 0 |
| CCCCC[n+]1cccc1                            |   |   |   | 0 |
| Cc1c(cc2c(c1N(=O)=O)C(C)(C)CC2(C)C)N       |   |   | 0 |   |
| CCCCCCCCS                                  |   |   |   | 0 |
| OC1=C(CC2=C(O)c3ccccc3(                    |   | 0 |   | 1 |
| CC(=O)Oc1cc                                | 0 | 0 |   | 1 |
| O[N+](=C=Cc1occc1)[O-]                     |   |   | 0 |   |
| [O-][N+](=O)c1ccc2c(cc3cccc(c3c2c1)[N      |   |   | 1 |   |
| Oc1ccc(cc1N(=O)=O)c2cccc(c2)N(=O)=C        |   |   | 1 |   |
| [O-][N+](=O)c1ccc(s1)c2csc(NC=O)n2         |   |   | 1 |   |
| [O-][N+](=Nc1ccc2c(Cc3ccccc23)c1)c4cc      |   |   | 0 |   |
| ClC(=C1OC(=O)C=C1)Cl                       |   |   | 1 |   |
| CC(C)(C)CC(C)(C)c1ccc(O)c                  |   | 1 |   | 1 |
| C[C@]12CC[C                                | 0 |   |   |   |
| C[C@@H]1C                                  | 0 | 0 |   |   |
| CC(C)(C)OC(=O)c1ccc(O)cc1                  |   |   |   | 1 |
| COc1cc(N[S+](=O)([O-])c2                   |   | 0 |   |   |

|                                                       |   |   |   |
|-------------------------------------------------------|---|---|---|
| <chem>C[C@@H](O)CN(C[C@@H](C)O)C[C@@</chem>           | 0 |   |   |
| <chem>Nc1c2ncn(Cc3cccc3)c2nc[n+]1[O-]</chem>          | 1 |   |   |
| <chem>CC1C(CCC(C)(</chem>                             | 0 | 0 |   |
| <chem>CC1=CN([C@@H]2C[C@H](N=[N+]=[N-</chem>          | 1 |   |   |
| <chem>[O-][N+](=O)c1ccc2ccc3cccc4[C@H]5O[</chem>      | 1 |   |   |
| <chem>CN(C)c1ccc2c</chem>                             | 1 | 1 |   |
| <chem>Cc1ccc(cc1)c2cc(nn2c3ccc(</chem>                | 0 |   |   |
| <chem>CC(=C[C@H]1[C@H](C(=O)O[C@@H]2C</chem>          | 1 |   |   |
| <chem>CCCC(=O)OCCC(C)CCC=C(C)C</chem>                 |   |   | 0 |
| <chem>OC1OCCOC1O</chem>                               |   |   | 0 |
| <chem>C\C=C\C1=CC(=O)C23CC2C(C)(C)OC3(O)</chem>       | 1 |   |   |
| <chem>Oc1c(l)cc(l)c2cccnc12</chem>                    | 0 |   | 0 |
| <chem>CC1(C)Cc2cccc(N)c2O1</chem>                     |   |   | 0 |
| <chem>Cc1ccc(Nc2ccc(cc2)N(=O)=O)cc1</chem>            | 1 |   |   |
| <chem>C[n+]1c2cccc2cc3cccc13</chem>                   | 1 |   |   |
| <chem>CCC1=C(C(=O)OC)C(=O)OC1C</chem>                 | 1 |   |   |
| <chem>CC(C)C(C)\C=C\C(C)C1CCCz</chem>                 | 1 |   |   |
| <chem>CCCCCOc1c</chem>                                | 1 | 0 |   |
| <chem>Nc1cccc(c1)S(=O)(=O)O</chem>                    | 0 |   |   |
| <chem>COc1ccc2c(c1)C(=O)N(CCc</chem>                  | 0 |   |   |
| <chem>CC1OC(CC(N)</chem>                              | 0 |   | 1 |
| <chem>Cc1nc(cs1)c2oc(cc2)[N+](=O)[O-]</chem>          | 1 |   |   |
| <chem>COc1cc(NCC(</chem>                              | 0 | 0 |   |
| <chem>[O-][N+](=O)c1cc(cc(c1)[N+](=O)[O-])C</chem>    | 1 |   |   |
| <chem>CC(=O)c1ccncc1</chem>                           | 0 |   |   |
| <chem>OCC1CCC(O1)N2C=CC(=N)NC2=O</chem>               | 1 |   |   |
| <chem>C1CN(CCN1)c2cccc2</chem>                        | 0 |   |   |
| <chem>COc1cccc(c1)</chem>                             | 0 | 0 | 0 |
| <chem>O[C@H]1C=C[C@H]2[C@@H]3Cc4ccc(O)c5O[C@@H</chem> |   |   | 0 |
| <chem>[O-][N+](=O)c1cc2Oc3cc(Cl)c(Cl)cc3Oc2</chem>    | 1 |   |   |
| <chem>CS(=O)(=O)OC[C@@H](O)[C@H](O)CO:</chem>         | 1 |   |   |
| <chem>CCCC(C)(COC(=O)N)COC(=</chem>                   | 0 |   | 0 |
| <chem>OCCS</chem>                                     | 0 |   |   |
| <chem>Cc1cc(ccc1N=Nc2cc(c3cccc3c2N)S(=O)</chem>       | 0 |   |   |
| <chem>CCOC(=O)N(C)N=O</chem>                          | 1 |   | 0 |
| <chem>CNC(C)Cc1cccc1OC</chem>                         |   |   | 0 |
| <chem>CN(C)CCCCSC(=N)N</chem>                         | 0 |   |   |
| <chem>CCOP(=S)(OCC)Oc1nc(Cl)n(n1)C(C)C</chem>         | 1 |   | 0 |
| <chem>CC(=O)CC(C1</chem>                              | 0 | 0 |   |
| <chem>[O-][N+](=O)</chem>                             | 0 | 0 | 1 |
| <chem>Cc1cc(cc(C)c1N)c2cc(C)c(N)c(C)c2</chem>         | 0 |   |   |
| <chem>CC(=O)c1cccc2c1OC3(C)OOC23C</chem>              | 1 |   |   |
| <chem>[O-][N+](=O)c1c(Cl)c(Cl)c(Cl)c(Cl)c1Cl</chem>   | 0 |   |   |

|                                                  |   |   |
|--------------------------------------------------|---|---|
| Clc1ccc(C=O)c(Cl)c1                              | 0 | 0 |
| O=C1c2ccccc2c3c1ccc4ccccc34                      | 1 |   |
| COc1ccccc1N2CCN(CCN3C                            | 1 |   |
| CCCSc1ccc2[r                                     | 0 |   |
| CN1CC[C@@]23[C@H]4CC[C@H](O)[C@@H]2Oc5c((        |   | 0 |
| C(Oc1ccc(cc1)c2ccccc2)C3CO3                      | 1 |   |
| CC(C)[C@H](C(=O)OC(C#N)c1cccc(Oc2ccccc2)c1)c3cc  |   | 1 |
| Nc1cnc2ccc3ccccc3c2c1                            | 1 |   |
| c1cc2ccc3ccc4ccc5ccccc6c(c1)c2c3c4c56            | 1 | 0 |
| Cc1ccc2ccc3ccccc3c2c1C                           | 0 |   |
| ClCC(=O)CCl                                      | 1 |   |
| OC(=O)c1ccc                                      | 0 | 0 |
| CCCCCCCCC1CO1                                    | 0 | 0 |
| CCCC[C@H]1                                       | 0 | 0 |
| C[C@@H](Cc                                       | 1 | 0 |
| OC1C(Oc2cccc3c4ccc5ccccc6ccc(cc23)c4c            | 0 |   |
| [O-][N+](=O)                                     | 0 | 0 |
| COc1cc(CNC(=O)CCCC\C=C                           | 0 |   |
| COc1ccc(cc1l                                     | 0 |   |
| CCOC(=O)Cn1cccc1c2nc(c3ccc(OC)cc3)c(s2)c4ccc(OC) |   | 0 |
| Oc1cc2cc3ccccc3c4ccc5ccccc1c5c24                 | 1 |   |
| Oc1ccc(CCNCC2CCc3ccccc2                          | 0 |   |
| Cc1cccc(OCC(O)CNC(C)(C)C)c1C                     | 0 |   |
| Nc1cccc(c1)C(F)(F)F                              | 0 | 0 |
| CCOC(=O)OC(C)OC(=O)[C@@H]1N2[C@H](SC1(C)C)[      |   | 0 |
| Cc1ccc(cc1)C(=O)[C@@H]                           | 0 |   |
| C[C@@H]1C(=O)O[C@H]2                             | 0 |   |
| ClC(Cl)(Cl)C(Cl)(Cl)Cl                           | 0 | 0 |
| C\C(=N/Cc1ccccc1)\c2ccccc2O                      |   | 0 |
| CC1OC(C)OC(                                      | 0 | 0 |
| Oc1cc(C=C(C                                      | 0 | 0 |
| CC(N)CCCC(C                                      | 0 | 0 |
| C[C@H](CSC(                                      | 0 | 0 |
| CCCCOC(=O)CCCC(=O)OCCCC                          |   | 0 |
| OC(=O)C=Cc1oc(cc1)N(=O)=O                        | 1 |   |
| Cn1c(NS(=O)(=O)O)nc2c3nc(CO)cnc3ccc              | 0 |   |
| O[C@@H]1[r                                       | 0 | 0 |
| Oc1ccc(cc1)C(=O)c2ccc(O)cc2O                     |   | 1 |
| CC(C)OCCO                                        |   | 0 |
| OC[C@H]1O[C@H]([C@H](O)[C@@H](r                  | 1 |   |
| Oc1cccc2cccr                                     | 0 | 0 |
| Nc1cccc(N)c1                                     | 1 | 1 |
| CCOC(=O)\C=C\C(=O)OCC                            |   | 0 |

|                                             |   |   |   |
|---------------------------------------------|---|---|---|
| CCN[C@@H]1C[C@H](C)!                        | 0 |   |   |
| OC(=O)C1=NN(C(=O)[C@H]1N=Nc2ccc(            | 0 |   |   |
| CN(C)CCOc1c                                 | 1 | 1 |   |
| CCCCCCC\C=C/CCCCCCC(=O)NCc1ccc(O)c(OC)c1    |   |   | 1 |
| CN(CCCC(=O)c1cccnc1)N=O                     | 1 |   |   |
| COC(=O)[C@H]1[C@@H](C[C@@H]2CC[C@H]1N2C)    |   |   | 0 |
| O=Nc1ccccc1c2ccccc2                         | 1 |   |   |
| C[C@]12CCC(=O)C=C1C=C[C@@H]3[C@@H]2CC[C@    |   |   | 0 |
| CC(C)CCC[C@@H](C)CCC[C@@H](C)CCC[C@]1(C)CCc |   |   | 0 |
| CC1(C)CCC(=Cc2ccc(Cl)cc2)C1(O)Cn3cncn3      |   |   | 0 |
| CN1C[C@@H](CO)C=C2C1                        | 0 |   |   |
| CCON=O                                      | 0 | 0 | 0 |
| C[N+]1(C)CCOCC1                             | 0 |   |   |
| CN1C(CSCC(F)(F)F)Nc2cc(Cl)c(cc2S1(=O        | 0 |   | 0 |
| CN[C@H]1[C@@H](O)[C@H]2O[C@H](O[C@@H]3[C    |   |   | 0 |
| CS(=N)(=O)CCC(N)C(=O)O                      | 0 |   |   |
| COC(=O)c1ccccc1C                            |   |   | 0 |
| COc1ccc2C[C                                 | 1 | 1 |   |
| CIP(=O)(Cl)c1ccccc1                         |   |   | 0 |
| CC(O)[C@@H]1NC(=O)[C@H](CCCCN)NC(=O)[C@H](  |   |   | 0 |
| CCCC(C(=O)C                                 | 1 | 1 |   |
| CCC(=O)OC(C)c1ccccc1                        |   |   | 0 |
| CC[C@]1(O)C[C@H]2CN(C                       | 1 |   |   |
| OC(=O)c1ccc(cc1)C(=O)O                      |   |   | 0 |
| CCCSSCC=C                                   | 0 |   | 0 |
| Nc1ccc(Cl)cc1[N+](=O)[O-]                   | 1 |   |   |
| CCCCCCCCCCCCCCCCI                           |   |   | 0 |
| Clc1ccc2Nc3ccccc3C(=Nc2                     | 1 |   |   |
| C[C@@H](C                                   | 0 | 0 |   |
| NC(Cc1onc(O)c1Cl)C(=O)O                     | 0 |   |   |
| O\N=C\1/C2CC2(Oc3ccccc                      | 0 |   |   |
| [O-][N+](=O)c1cc(c2c3CCCCc3c4ccccc5cc       | 1 |   |   |
| CCN1\C=C/C                                  | 1 | 1 |   |
| CC(=O)OCC(=                                 | 0 | 0 | 0 |
| Cc1ccc2nc3c4ccccc4C(O)C(O)c3c(C)c2c1        | 0 |   |   |
| CSc1nc(N)c2ncn([C@@H]:                      | 0 |   |   |
| Oc1cc2C(=O)c3ccccc3C(=O)c2c(O)c1O           | 1 |   |   |
| Cc1nnc2CN=(                                 | 0 | 0 | 0 |
| C[C@@H]1C                                   | 0 |   | 0 |
| CC(C)C1CC=C(C)C=C1                          |   |   | 0 |
| CCC(C)CCCC                                  | 0 | 0 | 0 |
| COc1cc2OC3OC=CC3(O)c2c4oc(O)c5c(O           | 1 |   |   |
| Clc1cc2ccccc2c3ccccc13                      | 1 |   |   |

|                                                  |   |   |   |
|--------------------------------------------------|---|---|---|
| N[C@@H](C                                        | 0 |   |   |
| [O-][N+](=O)c1ccc2c(c1)C(=O)c3cc(cc(c            | 1 |   |   |
| [O-][N+](=O)c1c(Cl)c(Cl)c2Oc3c(Cl)c(Cl)          | 1 |   |   |
| CCCCS(=N)(=                                      | 0 |   |   |
| CC1(C)OC2CC                                      | 0 | 0 |   |
| CCCCC(=O)O                                       |   |   | 0 |
| Fc1ccc(cc1)C                                     | 0 | 0 | 0 |
| OCC#CCO                                          |   |   | 0 |
| CC(C)Cc1cccc1                                    |   |   | 0 |
| CN(C)C(=O)Oc1cc(OC(=O)N(C)C)cc(c1)C(O)CNC(C)(C)( |   |   | 0 |
| CCN(CC)C1CCCC1                                   |   |   | 0 |
| O=Cc1ccc(cc1N(=O)=O)N(=O)=O                      | 1 |   |   |
| CC1(C)O[C@@H]2CO[C@@]3(COS(=O)(=O)N)OC(C)(       |   |   | 0 |
| COc1nncc2ncccc12                                 | 0 |   |   |
| CC(C)NCC(O)COc1cccc2CC=Cc12                      | 0 |   |   |
| O=N(=O)c1cc2CCc3cc(cc4CCc(c1)c2c34)              | 1 |   |   |
| O=N(=O)c1cc2c3cccc3ccc2c4cccc14                  | 1 |   |   |
| CC1(C)C(=O)NC(=O)NC1=O                           |   |   | 0 |
| CCOC[C@H]1CO1                                    | 1 |   |   |
| Clc1ccc(cc1Cl)N=C=O                              |   |   | 1 |
| CCCCNS(=O)(=O)c1ccc(C)cc1                        |   |   | 0 |
| O1C2C3OC3c4ncccc4C12                             | 0 |   |   |
| ClCC1=C(Br)C(=O)OC1                              | 1 |   |   |
| Clc1ccc2cccc2c1                                  | 0 |   | 0 |
| OC(=O)Cc1cs                                      | 0 | 0 | 0 |
| COc1ccc(CN(                                      | 0 | 0 | 0 |
| OC(CN1CCC(                                       | 1 | 1 |   |
| NC[C@H]1O[C@H](O[C@@H]2[C@@H](N)C[C@@H           |   |   | 0 |
| Oc1ccc2ccc3ccc(c4ccc1c2c34)N(=O)=O               | 1 |   |   |
| NC(=O)c1cc(cc(c1)N(=O)=O)N(=O)=O                 |   |   | 0 |
| CC(=O)Nc1ccc(cc1)c2nc3c                          | 0 |   |   |
| CC(C)(C)N(CCO)CCO                                | 0 |   | 0 |
| CCCCCCCCCCCCC#N                                  |   |   | 0 |
| COC(=O)C(C)CN=N#N                                | 1 |   |   |
| BrCc1cccc(c1)N(=O)=O                             | 0 |   |   |
| Cc1c(cccc1N(=O)=O)C(=O)O                         |   |   | 0 |
| CC(=O)O[C@                                       | 0 | 0 |   |
| CC(C)C[C@@H]1NC(=O)[C@H](CCCN)NC(=O)[C@@H        |   |   | 1 |
| CC(C)OC(=O)                                      | 0 | 0 |   |
| NC[C@H]1O[C@H](O[C@@H]2[C@@H](N)C[C@@H           |   |   | 0 |
| CCCCCCCCC                                        | 0 | 0 | 0 |
| Cn1ccc2ccc3ccc4ccc(O)cc4c3c12                    | 1 |   |   |
| C[C@@H](Br)CBr                                   | 1 |   |   |

|                                                |   |   |   |
|------------------------------------------------|---|---|---|
| CC(=O)C(Cl)Cl                                  | 1 | 0 |   |
| CCCCCCCCCCCC=C                                 | 0 | 0 |   |
| CC(=O)[C@H                                     | 0 | 0 | 0 |
| Cc1onc(c2ccccc2Cl)c1C(=O)N[C@H]3[C@H]4SC(C)(C) |   |   | 0 |
| NCCNCCN                                        | 0 |   | 0 |
| CC(C)c1ccc2c(CC[C@@H]3                         | 1 |   |   |
| CICCNP1(=O)OCCCN1CCCl                          | 1 |   | 0 |
| COc1ccc(C=NN2N=Nc3c([nH]c4ccccc34)             | 1 |   |   |
| Oc1ccc2C[C@H]3N(CC=C)(                         | 0 |   | 0 |
| CCCCSCCCCC                                     |   |   | 0 |
| OC1C=Cc2c(ccc3cc4ccccc4cc23)C1O                | 1 |   |   |
| C[C@]1(O)CC[C@@H]2[C@@H]3CC[C@                 | 0 |   |   |
| CN1CC[C@@H]2CN3CCc4c                           | 0 |   |   |
| CN=NO                                          | 1 |   |   |
| OCCCl                                          | 1 |   | 0 |
| Nc1cc(C(=C(                                    | 0 |   | 0 |
| CC1C(C)(C)c2cc(C)c(cc2C1(C)C)C(=O)C            | 0 |   |   |
| O=C1C=C(Nc2ccccc2)C(=O)c3ccccc13               | 1 |   |   |
| Cc1cnc2ccccc2n1                                | 0 |   |   |
| CCNCC#CC(C)(C)OC(=O)C(O)(C1CCCCC1)             | 0 |   |   |
| COc1ccccc1C                                    | 0 |   | 0 |
| CCC(=O)O[C(                                    | 0 | 0 |   |
| C[C@H]1CC2                                     | 0 | 0 |   |
| OCC1OC(C(O)C1O)N(N=O)c2ccc(cc2)N(:             | 1 |   |   |
| COP(=O)(O)OC                                   | 0 |   | 0 |
| CCN(CCCl)CCCNc1c2ccccc2nc3c1ccc4ccc            | 1 |   |   |
| CCCC(=O)Nc1ccc(OCC(O)CNC(C)C)c(c1)C            | 0 |   | 0 |
| OC(C(COC(=O)CCC(=O)O)N=C(O)C(Cl)Cl)            | 0 |   |   |
| CCN(CC)CCO(                                    | 0 | 0 | 0 |
| Nc1c2ncnc2[nH]cn1=O                            | 1 |   |   |
| CC(=O)Nc1cccc(N=[N+])([O-])c2cccc(NC           | 0 |   |   |
| CCCN(CC)c1c(cc(cc1N(=O)=O)C(F)(F)F)N(=O)=O     |   |   | 1 |
| Cc1ccc2c(c1)nc(N)n2C                           | 1 |   |   |
| CC(C)CC(CN)(                                   | 0 | 0 |   |
| [O-]C(=O)c1c                                   | 0 | 0 | 0 |
| CCCCCOC(=O)C(C)C                               |   |   | 0 |
| CCCC(=O)Nc1snc2ccc(C)cc12                      | 0 |   |   |
| CCOP(=O)(OCC)Oc1ccc(cc1)N(=O)=O                | 1 |   | 0 |
| CN(C)CCc1c[nH]c2ccc(C[C@H]3COC(=O)N3)cc12      |   |   | 0 |
| OC1C=Cc2c(ccc3c4ccccc4c(cc23)N(=O)=            | 1 |   |   |
| COC(=O)N\N                                     | 0 | 0 | 0 |
| [O-][N+](=O)c1ccc(S)cc1                        | 1 |   |   |
| Oc1ccc2ccc3cccc4ccc1c2c34                      |   |   | 1 |

|                                            |   |   |   |   |   |
|--------------------------------------------|---|---|---|---|---|
| Oc1c(l)cc(l)c                              | 0 | 0 | 1 |   |   |
| OC(=O)c1cccc1C(=O)OCc2cccc2                |   |   | 0 |   |   |
| CCN1CCCC1CNC(=O)c2cc(c(N)cc2OC)S(=O)(=O)CC |   |   | 0 |   |   |
| CC1CCOS(=O)(=O)O1                          |   |   | 1 |   |   |
| ClC1=C(Cl)C(=O)NC1=O                       |   |   | 1 |   |   |
| ClC[C@H](Br)CBr                            |   |   | 1 |   |   |
| N[C@@H](Cc1ccc(O)c(c1)[N+](=O)[O-])        |   |   | 0 |   |   |
| COC(=O)C=Cc1oc(cc1)N(=O)=O                 |   |   | 1 |   |   |
| Nc1snc2c(Cl)cc(Cl)cc12                     |   |   | 1 |   |   |
| CC(=O)Oc1c(OC(=O)C)c2c(ccc3c4cccc4         |   |   | 1 |   |   |
| CC(C)(C)NCC                                | 0 | 0 |   | 0 | 0 |
| OCc1ccc(O)cc1                              |   |   | 0 |   |   |
| BrC[C@@H](Br)COC(=O)C=C                    |   |   | 1 |   |   |
| OC[C@H]1O                                  | 0 | 0 |   | 0 |   |
| FC(F)(F)COC=C                              |   |   | 1 |   |   |
| N=NC1=NNC=C2C=CC=CC12                      |   |   | 1 |   |   |
| OC(=O)C1CC                                 | 1 | 0 |   |   |   |
| CCNC(=O)Nc1ccc(OCC(O)CNC(C)(C)C)c          |   |   | 0 |   |   |
| CC(C)c1ccc(C)c2c(cc(C)c2c1)S(=O)(=O)C      |   |   | 0 |   |   |
| CC(O)CCCN:                                 | 0 | 0 |   | 0 |   |
| CCCCCCCCOC                                 | 0 | 0 | 0 | 0 |   |
| OC(=O)CCN(=O)=O                            |   |   |   | 0 |   |
| CCC1(Cc2cccc                               | 0 | 0 |   | 0 |   |
| CC(=C)C1CO1                                |   |   | 0 |   |   |
| NCCCNCCCN                                  |   |   | 0 |   |   |
| OC[C@H]1O                                  | 0 |   |   |   |   |
| CNS(=O)(=O)c1ccc(NC(=O)C)cc1               |   |   | 0 |   |   |
| CCCCOC(=O)C(C)O                            |   |   |   | 0 |   |
| Fc1cccc(F)n1                               |   |   | 0 |   |   |
| OC(=O)c1cccc(c1)C(F)(F)F                   |   |   |   | 0 |   |
| COC(=C1[C@@H](C(=C(COC(=O)N)N=C1           |   |   | 0 |   |   |
| BrC1ccc(cc1)l                              | 0 | 0 |   | 0 |   |
| COC(=O)c1cccc(Cl)c1                        |   |   |   | 0 |   |
| Oc1ccc(C(=O)c2ccc(O)c(O)c2)c(O)c1          |   |   |   | 1 |   |
| CO[C@H]1[C@@H](C[C@@H]2CN3CCc4c([nH]c5cc(C |   |   |   | 0 |   |
| NC(=S)\C(=C\c1ccc(O)c(O)                   |   | 0 |   |   |   |
| COc1cc\C=C\C(=O)O)ccc1O                    |   |   | 0 |   |   |
| COc1cc(N[C@                                | 0 | 0 |   |   |   |
| CN(N=O)C(=O)N[C@H]1[C@@H](O)O[C@H](CO)[C@  |   |   |   | 0 |   |
| CC(=O)O[C@H]1C[C@@H]                       |   | 0 |   |   |   |
| CN(C)CCCNc1c2cccc2nc3c(F)ccc(c13)[N        |   |   | 1 |   |   |
| COC(=O)c1cccc1C(=O)O                       |   |   |   | 0 |   |
| CC1(C)CC2=C(C1)C(C=O)C3(CC3(C)C2O)C        |   |   | 1 |   |   |

|                                               |   |   |
|-----------------------------------------------|---|---|
| Fc1cc2cccnc2c3ccccc13                         | 1 |   |
| Oc1oc(cc1)C(=O)O                              |   | 0 |
| COC(=O)CCC1=C(C)C2=NC1=CC3=NC(=CC4=NC(=CC5=   |   | 1 |
| OCC(O)C(O)C(O)C(O)C=O                         | 0 |   |
| CO[C@H]1C[C@H](O[C@H]2[C@H](C)[C@@H](O[C@H]3  |   | 0 |
| c1ccc2c(c1)ncc3cnc4ccccc4c23                  | 0 |   |
| c1ccc2c(c1)ccc3[nH]c4ccc5ccccc5c4c23          | 1 |   |
| Brc1c(NC2=N                                   | 0 | 0 |
| CN1C(=S)CN=                                   | 0 | 0 |
| C\C=C/C(=C/C1=CCOC1=O)/C)\C=C\C=C             | 1 |   |
| [O-]C(=O)c1ccccc1                             |   | 0 |
| CC(=CCC\C(=C\COc1c2OC(                        | 0 |   |
| CC(C)(C)C1CCC(=O)CC1                          |   | 0 |
| [O-]C(=O)Cc1                                  | 0 | 0 |
| CO[C@H]1C[C@@H]2CN3CCc4c([nH]c5cc(OC)ccc45)[  |   | 0 |
| Cc1ccc2ccc3c4ccccc4cc5ccc1c2c35               | 1 |   |
| CC12NC(Cc3ccccc13)c4ccc                       | 0 |   |
| CN1[C@@H]2CC[C@@H]1                           | 0 |   |
| [O-][N+](=O)c1ccc2c(Cc3cc(ccc23))[N+](        | 1 |   |
| CC(=O)N1CC[N+](C)(C)CC1                       | 0 |   |
| CCc1ccc(\C=C/2\SC(=S)NC                       | 0 |   |
| CC1=CC(=O)c2ccccc2C1=O                        | 0 | 1 |
| S=C=Nc1cccc2ccccc12                           |   | 1 |
| COc1cccc([C@H](O)C2CCN(CCc3ccc(F)cc3)CC2)c1OC |   | 0 |
| C1CCC#N                                       |   | 0 |
| [O-][N+](=O)c1oc(cc1)c2csc(NC=O)n2            | 1 |   |
| N=C1Sc2cccc                                   | 0 |   |
| ClC(=C1OC(=O)C(=C1Cl)Cl)Cl                    | 1 |   |
| C[C@@H](N)[C@@H](O)c1ccccc1                   | 0 | 0 |
| CC(=O)ON(OCc1ccc(cc1)c2ccccc2)C(=O)           | 1 |   |
| CC1C2C(=Nc3ccc(C)cc23)N(C)c4ccc(C)cc          | 1 |   |
| CNC(C)CC1CCCCC1                               |   | 0 |
| CC1OC=C2C(=C(C(=O)O)C(=O)C(=C2C1C)            | 0 |   |
| Oc1ccccc1C#N                                  |   | 0 |
| NC(=N)N1CC                                    | 0 | 0 |
| CCCN(CCCC)CCCOc(=O)c1                         | 0 | 0 |
| Nc1c([S+])([O-])C(F)(F)F)c1                   | 0 |   |
| C1CCN(CCCl)CCCl                               | 0 | 0 |
| OC1C=Cc2cc3cc(ccc3cc2C1O)[N+](=O)[C           | 1 |   |
| OCC(O)C(O)C(O)C1SCCN1N=O                      | 0 |   |
| Oc1ccc(c2ccccc2)N(=O)=O                       |   | 1 |
| [O-][N+](=O)c1cccc(c1)C(=                     | 0 |   |
| COc1ccc(N(CCCl)CCCl)c2oc(cc12)N(=O)=          | 1 |   |





|                                                 |   |   |   |   |   |
|-------------------------------------------------|---|---|---|---|---|
| Nc1cc(O)nc(I                                    | 0 | 0 |   |   |   |
| CN(C)CCNC(=O)c1cccc2c3ccccc3cnc12               |   |   | 1 |   |   |
| [O-][N+](=O)c1ccc2c(Cc3cc4c(Cc5ccc              |   |   | 1 |   |   |
| CN1CC(=O)N                                      | 0 | 0 |   |   |   |
| CCC(=O)C1c2cccc(O)c2C(=O)c3c(O)cccc:            |   |   | 1 |   |   |
| Nc1ccc2snc(Cl)c2c1                              |   |   | 1 |   |   |
| COc1cc(cc(OC)c1O)C(=O)C                         |   |   | 0 |   |   |
| CC(\C=C(\C#N)/c1ccc(Br)cc1)C(C(C#N)c:           |   |   | 0 |   |   |
| CCC(=O)O[C@                                     | 0 | 0 |   |   |   |
| CC(=O)Nc1nc(cs1)c2oc(cc2)[N+](=O)[O-            |   |   | 1 |   |   |
| Cc1cccc(c1C)[N+](=O)[O-]                        |   |   | 1 |   |   |
| CCN(CC)C(=O                                     | 0 | 0 | 0 | 0 |   |
| O=C1CCc2cc(                                     | 0 | 0 |   | 0 |   |
| CC(C=C)C#N                                      |   |   | 0 |   |   |
| CC(C)C[C@H](NC(=O)N1CC                          |   | 0 |   |   |   |
| Cc1ccc(cc1N(CCCl)CCl)C(O)(P(=O)(O)O             |   |   | 1 |   |   |
| CCN1C[C@]2(COC)[C@H](                           |   | 0 |   |   |   |
| CC(C)(Cl)N(=O)=O                                |   |   | 1 |   |   |
| CCCCCCCCc1ccc(cc1)c2ccc(                        |   | 0 |   |   |   |
| C[C@H](N)C                                      | 0 | 0 |   | 0 | 0 |
| OC1C2(Cl)C3(Cl)C4(Cl)C(Cl)(Cl)C5(Cl)C(C         |   |   | 0 |   |   |
| CSCCC(NC(=O)COc1ccc(Cl)cc1Cl)C(=O)O             |   |   | 0 |   |   |
| NC(CC(=O)c1ccccc1N)C(=C                         |   | 0 | 0 |   |   |
| NCCCCCN[S+](=O)([O-])c                          |   | 0 |   |   |   |
| O=N(=O)c1cccc2c1oc3ccccc23                      |   |   | 1 |   |   |
| COP(=S)(OC)Oc1ccc(N=O)c(C)c1                    |   |   | 1 |   |   |
| CCN(CCCOC                                       | 1 | 0 |   |   |   |
| CCCN(CCC)C1CCc2cccc(O)c                         |   | 0 |   |   |   |
| Cn1c(N=N#N)nc2ncc(cc12)c3ccccc3                 |   |   | 1 |   |   |
| CCCCCCCCCCCC(=O)OC[C@@H](O)[C@H]1OC[C@H](C      |   |   |   | 0 |   |
| CCCCCCCCCCCCCCCC(=O)OC                          |   |   |   | 0 |   |
| CC12CC1(C)C(=O)N(C2=O)c3cc(Cl)cc(Cl)c3          |   |   |   | 0 |   |
| COC(=O)C12OC1(C)C(C)OC2=O                       |   |   | 1 |   |   |
| CN1C(C(=O)Nc2ncc(C)s2)C                         |   | 0 |   |   |   |
| CN[C@H]1CC[C@@H](c2ccc(Cl)c(Cl)c2)c3ccc(cc13)S( |   |   | 1 |   |   |
| O=C(OCc1ccccc1)C=Cc2ccccc2                      |   |   |   | 0 |   |
| OC\C=C\1/O[C@@H]2CC(=O)N2[C@H]1C(=O)[O-]        |   |   |   | 0 |   |
| CCCCc1cc(O)c2[C@@H]3C=C(C)CC[C@H]3C(C)(C)Oc:    |   |   |   | 1 |   |
| CCN=[N+](O)CC                                   |   |   | 0 |   |   |
| C([C@@H]1CO1)c2ccc3OCOc3c2                      |   |   | 1 |   |   |
| CCC(CN)CC(C)CCNCC(O)CNCC(C)CC(C)CN              |   |   |   | 0 |   |
| CNC(=O)Oc1ccc(N(C)C)c(C)c1                      |   |   |   | 0 |   |
| [O-][N+](=O)                                    | 0 | 0 |   |   |   |

|                                            |   |   |   |
|--------------------------------------------|---|---|---|
| COC(=O)CC(=O)C(C)(C)C                      |   |   | 0 |
| CCCCCCCCCCCCc1cccc1                        | 0 |   | 0 |
| C(Oc1cccc1)C2CO2                           | 1 |   |   |
| CCCN1C(=O)N(CCC)c2nc([r                    | 0 |   |   |
| [O-][N+](=O)c1c(Cl)cc2Oc3cc(Cl)c(Cl)cc     | 0 |   |   |
| CC(=O)ON(Oc1ccc(Oc2cccc2)cc1)C(=C          | 1 |   |   |
| Nc1ccc2c(c1)[nH]c3cccc23                   | 1 |   |   |
| Oc1ccc(Oc2                                 | 0 | 0 | 1 |
| CCOC(=O)c1cccc1N                           | 0 |   | 0 |
| COC(=O)c1cc(Oc2ccc(Cl)cc2Cl)ccc1[N+](      | 1 |   |   |
| COc1ccc2[C@H]3CC[C@]4                      | 0 |   |   |
| Cn1cc(C(=O)[C@@H]2CCc3nc[nH]c3C2)c4cccc14  |   |   | 0 |
| CCCN(CCC)C(                                | 0 | 0 |   |
| CCCCc1ccc(nc1)C(=O)O                       |   |   | 0 |
| CC(C)CCCC(C)C1CCC2C3CC4OC45CC(O)C(         | 1 |   |   |
| CCCCCC#CC(=O)OC                            |   |   | 0 |
| CCCCCCc1cc(O)c2c(OC(C)(C)c3ccc(C)cc23)c1   |   |   | 1 |
| CC(C)C[C@@H](C)N                           | 0 |   |   |
| CC1C=C(C)CCC1C=O                           |   |   | 0 |
| COc1ccc2[nH]c(l)c(CCNC(=                   | 0 |   |   |
| OOC1CCCc2cccc12                            | 1 |   |   |
| OC(=O)CN(CCN(CC(=O)O)(                     | 0 |   | 0 |
| CCOC(=O)c1c                                | 0 | 0 | 0 |
| C[C@]12C=CC3=C4CCC(=O)C=C4CC[C@H]3[C@@H]1C |   |   | 0 |
| COC(=O)C(C1                                | 0 | 0 | 0 |
| CCCCCCCC                                   | 0 |   | 0 |
| Oc1cc2cccc2cc1C(=O)Nc3cccc(c3)N(=O)=O      |   |   | 1 |
| NS(=O)(=O)c                                | 0 |   | 0 |
| Cc1ccc(cc1)N(=O)=O                         |   |   | 0 |
| OP(=N)(O)N(CCCl)CCCl                       | 1 |   |   |
| C1=Cc2c3cccc3cc4cc5cccc5c1c24              | 1 |   |   |
| COc1ccc2NC(                                | 0 | 0 |   |
| OC[C@H](Br)CBr                             | 1 |   |   |
| CN1[C@@H]2CC[C@H]1C(                       | 0 |   |   |
| NC1=NC(=O)N(C=C1)[C@@H]2CC[C@H]            | 1 |   |   |
| C\C=C\C=C\C\CCCCCO                         | 0 |   | 0 |
| COCCc1ccc(C                                | 0 | 0 |   |
| CCCC[C@@H](CC)COC(=O)c1cccc1C(=C           | 0 |   |   |
| C(Cc1ccncc1)Cc2ccncc2                      |   |   | 0 |
| OC=O                                       | 0 |   |   |
| CCCCCCCCC(                                 | 1 | 1 |   |
| C[C@@H]1C(                                 | 0 | 0 |   |
| [O-][N+](=O)c1cccc2c1oc3cccc23             | 1 |   |   |

|                                                 |   |   |
|-------------------------------------------------|---|---|
| COC(=O)Nc1nc2cc(ccc2[nH]1)C(=O)c3cc             | 0 |   |
| CCOC(=O)C(Cl)Cc1cc(N2N=C(C)N(C(F)F)C2=O)c(F)cc1 |   | 0 |
| C[C@@H](O)                                      | 0 | 0 |
| [O-][N+](=O)c1oc(\C=C\C(=O)N\N=C\c2             |   | 1 |
| Cc1ccc(C)c2c3cc(ccc3[nH]c12)[N+](=O)[           |   | 1 |
| C[C@@H]1COc2c(N3CCN(C)CC3)c(F)c(C               |   | 1 |
| CCC(=O)O                                        |   | 0 |
| Oc1cc(O)c2C(=O)c3c(O)c4[C@@H]5C=C               |   | 1 |
| COc1ccc(cc1)C(O)C=C                             |   | 0 |
| Nc1cccc2nc3cccc3c(N)c12                         |   | 1 |
| CCCCC1CO1                                       |   | 0 |
| CC1(C)S[C@@H]2[C@H](NC(=O)C(N)c3cccc3)C(=O)I    |   | 0 |
| NCCC(=O)O                                       |   | 0 |
| CCOP(=S)(OCC)SCSCC                              |   | 0 |
| OC1C=Cc2c(ccc3nc4ccc5cccc5c4cc23)C              |   | 1 |
| OC(=O)C(Cc1ccc(O)c(O)c1)                        |   | 0 |
| COP(=S)(NC(C)C)Oc1cccc1C(=O)OC(C)C              |   | 0 |
| COC1=CC=C2                                      | 0 | 1 |
| Cc1cc2CCN3C(=O)[C@H](NC(=O)c4ccncc4)N=C(c5ccc   |   | 0 |
| CC(C)C(=O)OC1=C(C)OC=CC1=O                      |   | 0 |
| CC(CC(=O)Cl)CC(C)(C)C                           |   | 0 |
| Cn1c(COC(=C                                     | 0 | 0 |
| OC(=O)c1ccc(cc1)C#N                             |   | 0 |
| O=C(O)[C@@                                      | 1 | 0 |
| COc1cc2OC3OC=CC3c2c4oc(O)c5c(O)cc(              |   | 1 |
| CC(C)(C)C(=O)C(=O)O                             |   | 0 |
| CSCC[C@H](NC(=O)[C@H](Cc1c[nH]c2cccc12)NC(=O    |   | 0 |
| CNc1cccc1                                       |   | 0 |
| OC(=O)Cl                                        |   | 1 |
| CC=C(Cl)Cl                                      |   | 0 |
| CO\N=C/1\C[C@]2(C[C@@H]3C[C@@H])(CC=C(C)C[C     |   | 1 |
| CC(C)C[C@H](CN)CC(=O)O                          |   | 0 |
| Nc1nc2ccc(cc2s1)N(=O)=O                         |   | 1 |
| CN1CCc2cc(O)c(O)cc2C(Cl                         |   | 0 |
| [O-][N+](=O)c1ccc2cccc3CCc1c23                  |   | 1 |
| CN(C)CC[C@                                      | 1 | 0 |
| CCCCCCCCC                                       |   | 0 |
| CC(=O)c1ccc:                                    | 1 | 0 |
| CC(=O)OC1(CCN(Cc2cccc2)CC1)c3cccc3              |   | 0 |
| CCC[C@@]1(Cc2cccc2)CC(=C([C@H](CC)c3cccc(NS(    |   | 1 |
| CC(C)c1cc(N)c(cc1N)[N+](=O)[O-]                 |   | 1 |
| CCN(Cc1cccc(c1)S(=O)(=O)O)c2ccc(cc2)            |   | 0 |
| CNCC[C@@F                                       |   | 1 |

|                                                     |   |   |
|-----------------------------------------------------|---|---|
| Cc1ccc(cc1)S                                        | 0 |   |
| CCO[C@@H]1O[C@H](C(COCc2ccccc2)OCc3ccccc3)[C        |   | 1 |
| CC(=O)N1N=CC(=C(Cl)C1=O)Cl                          | 0 |   |
| Fc1ccc(F)c2c1ccc3ncccc23                            | 1 |   |
| c1ccc2c(c1)ccc3cc4ccc5ccccc5c4nc23                  | 1 |   |
| CCN(CC)CCNc1ccc(COS(=O)(=O)C)c2Sc3                  | 1 |   |
| CCOC(=O)CCC(=O)C                                    |   | 0 |
| COC1OC(=O)C(=C1C(Cl)Cl)Cl                           | 1 |   |
| CC(C)(Oc1ccc                                        | 0 | 0 |
| COC(=O)c1cc2OCOc2c3c1ccc4c(OC)cccc                  | 1 |   |
| CC1=CN([C@                                          | 0 | 0 |
| CC(O)(P(=O)(O)O)P(=O)(O                             | 0 | 0 |
| N[C@@H](C(=O)O)c1ccc(                               | 0 |   |
| NCCCCNS(=C                                          | 1 |   |
| CC(C)(C)c1ccc(OC2CCCCC2OS(=O)OCC#C)cc1              |   | 1 |
| CCCC(S)(CCC)CCCC                                    | 0 |   |
| CC\C(=N/O)\C                                        | 1 |   |
| CCC(=O)OCC(=O)[C@@]1(OC(=O)CC)[C@@H](C)C[C@         | 1 |   |
| O[C@]1(COC(=O)c2cccnc2)O[C@H](COC(=O)c3cccnc:       | 0 |   |
| CN(C)S(=O)(=                                        | 1 |   |
| Clc1ccc(cc1)C(C(=O)C2C(=O)c3ccccc3C2=O)c4ccccc4     |   | 1 |
| Nc1nc(Cl)nc2c1ncn2C3CC(                             | 0 |   |
| CC(C)(C)CC(C)(C)c1ccc(Nc2ccc(cc2)C(C)(C)CC(C)(C)C)c |   | 0 |
| C\C(=C\C(=O                                         | 0 | 0 |
| NCCCCCN[S+](=O)([O-])c                              | 0 |   |
| COC(=O)c1ccc(C=NN2N=Nc3c([nH]c4ccc                  | 1 |   |
| CC1=NNC(=O)N(C1)\N=C\c2cccnc2                       |   | 0 |
| Oc1cc(cc(c1C                                        | 0 | 0 |
| COc1ccc2C[C                                         | 1 | 1 |
| CNc1c(C)cc2ncccc2c1N                                |   | 0 |
| CN(C)S(=O)(=                                        | 1 |   |
| NC1=NC(=O)N(C=C1)[C@@H]2O[C@H]                      | 0 |   |
| Cc1c(N)cccc1[N+](=O)[O-]                            | 1 |   |
| Oc1cc(c2ccc3ccccc4ccc1c2c34)N(=O)=O                 | 1 |   |
| C[C@H]1O[C                                          | 0 | 0 |
| O=C(NC1CCCCC1)OC(C#C)(c2ccccc2)c3cc                 | 1 |   |
| CCCCC(CC)CN                                         | 0 |   |
| COc1ccc(cc1                                         | 0 | 0 |
| CCN(CC)C=C                                          | 0 | 0 |
| OC(=O)CNCP(=O)(O)O                                  |   | 0 |
| NC1=NC(=O)N(C=C1)[C@+                               | 0 |   |
| CCCC[C@H](O)\C=C\C[C@                               | 0 | 0 |
| CC(C)NCC(O)                                         | 0 | 0 |

|                                                 |   |   |   |
|-------------------------------------------------|---|---|---|
| C[C@@H]1O[C@H](C[C@H](N)[C@H]1                  | 1 |   |   |
| O=C(NNCNN                                       | 0 | 0 |   |
| OC[C@H]1OC(O)[C@H](O)[C@@H](O)[C@@H]1O          |   | 0 | 0 |
| OCC1OC(CC1O)N2C=CC(=O)NC2=O                     | 0 |   |   |
| [O-]S(=O)(=O)CNNC(=O)c1ccncc1                   |   | 0 |   |
| CC1(CO1)c2ccc(cc2)C#N                           | 1 |   |   |
| Nc1cccc(O)c1                                    | 1 | 0 |   |
| Nc1cc(cc(c1)N(=O)=O)N(=O)=O                     | 1 |   |   |
| C[C@@H](N                                       | 0 | 0 |   |
| C1Cc2cc3cccc4ccc5cc6cccc1c6c2c5c34              | 1 |   |   |
| CC(C)[C@H](N)C(=O)OCCOCn1cnc2C(=O)NC(=Nc12)N    |   | 0 |   |
| CN(C)CCN(C)C                                    | 0 | 0 |   |
| Clc1cc2C(=O)c3cccc3C(=O)c2c4Nc5c(Cl)cc6C(=O)c7c |   | 0 |   |
| CCCCCCCCC=C                                     |   | 0 |   |
| CC1Cc2ccc(C(=O)NC(Cc3cccc3)C(=O)O)              | 0 |   |   |
| c1ccc(cc1)c2csc(n2)c3nc4c                       | 0 |   |   |
| c1ccc2c(c1)ccc3c4cccnc4ccc23                    | 1 |   |   |
| C1OCc2cccc12                                    | 1 |   |   |
| NC(=N)SCCc1                                     | 0 | 0 |   |
| CC1CCCC(C)N1CCCC(O)(c2cccc2)c3cccc              | 0 |   |   |
| CO[C@H]1O[C@H](CO)[C@@H](O)[C@H](O)[C@H]1       |   | 0 |   |
| COc1ccc(cc1)c2nc(c3cccc3)c([nH]2)c4c            | 1 |   |   |
| CCNCCCNCCCCNCCCNCC                              | 0 |   |   |
| NS(=O)(=O)c                                     | 0 | 0 |   |
| Nc1ccc(\C=C\c2cccc(c2)C#N)cc1                   | 1 |   |   |
| C[S+](=O)([O-])c1ccc(cc1)                       | 0 |   |   |
| Clc1ccc(NS(=O)(=O)c2cccc3cccnc23)cc1            | 0 |   |   |
| NS(=O)(=O)c                                     | 0 |   |   |
| NC[C@@H]1CC[C@@H](N)[C@@H](O[C@@H]2[C@          |   | 0 |   |
| CC1=C(SSC1=S)c2cncn2                            | 0 |   |   |
| Oc1c(Br)cc(\C=N\Oc2ccc(cc2N(=O)=O)N(=O)=O)cc1E  |   | 1 |   |
| CC(O)(C(=O)Nc1ccc(cc1)[S                        | 0 |   |   |
| CC(NNC(=O)c                                     | 0 | 0 | 1 |
| CC1=CC(=O)CC(C)(C)C1=O                          |   |   | 0 |
| Cc1ccc2cc3c4cccc4C5NC5c3c6CCc1c26               | 1 |   |   |
| C(CC[C@H]1CO1)C[C@H]2CO2                        | 1 |   |   |
| OC1OC(=O)C(=C1C(Br)Br)Br                        | 1 |   |   |
| CNC(=O)Oc1ccc(cc1)c2cccc2                       | 1 |   |   |
| C[C@@]12CCC[C@](C)([C@H]1CC[C@]:                | 0 |   |   |
| Cc1occc1                                        | 0 | 0 |   |
| OC1C(O)c2ccc(c3ccc4cccc1c4c23)[N+](=            | 1 |   |   |
| O=C(Nc1cccc2C(=O)c3c(ccc4c5cc(NC(=C             | 0 |   |   |
| CO\N=C/C(=O)N[C@H]1[C@H]2SCC(=C(N2C1=O)C(=      |   |   | 0 |

|                                                                              |   |   |   |
|------------------------------------------------------------------------------|---|---|---|
| CCOC(=O)[C@H](CCc1ccccc1)N[C@H]2CCCN3CCC[C@H]1ccc2[nH]cnc2c1                 | 0 | 0 | 0 |
| OC(=O)c1ccc(C(=O)O)c(c1)C(=O)O                                               |   |   | 0 |
| C[C@@H]1O[C@@H](OC[C@H]2O[C@@H](OC3=C(C)OC1=C(C2CCCc3ccccc23)C(=O)Oc4ccccc14 |   |   | 1 |
| CCNc1cc2OC3=C\C(=N/CC)\C(=CC3=C(c4CCCC(=O)OCCC(C)C                           | 0 | 0 | 0 |
| CCCC(C)C1(C)C                                                                | 0 | 0 |   |
| CN1C(C)(C)C                                                                  | 0 | 0 | 0 |
| COP(=S)(OC)                                                                  | 0 |   | 0 |
| O=N(=O)C1=Cc2cccc3cccc(O1)c23                                                |   | 1 |   |
| COc1ccc2CC3                                                                  | 0 | 0 |   |
| CC(Oc1cccc(Cl)c1)C(=O)O                                                      |   |   | 0 |
| CC(C)CC(=O)OCc1cocc2c(C=O)ccc12                                              |   | 1 |   |
| Cc1c2ccc3ccccc3c2cc4ccc(O)c(O)c14                                            |   | 1 |   |
| C[C@H](C(=O)O)c1cccc(c1)                                                     | 0 |   |   |
| OCc1c[nH]c2ccccc12                                                           |   |   | 1 |
| Cc1ccc(cc1)C(=O)ON(OCc2ccccc2)C(=O)O                                         |   | 1 |   |
| OC1C(O)c2ccccc3c4cc5ccccc5cc4C6(OC1c2c3c4c5c6)C(=O)O                         |   | 1 |   |
| Cc1cccc2c(cccc12)[N+](=O)[O-]                                                |   | 1 |   |
| [O-][N+](=O)\C=C\c1occcc1                                                    |   | 0 |   |
| OC(=O)c1ccc(Cl)c(c1)N(=O)=O                                                  |   | 1 |   |
| NC(=O)c1cc(Cl)ccc1                                                           | 0 | 0 |   |
| CCCCCCCCCCCCI                                                                |   |   | 0 |
| CC(C)(C)c1ccc(OCC2CO2)cc1                                                    |   | 1 | 0 |
| OC(=O)Cc1cc(Cl)c(Oc2cc(Cl)c(O)c(Cl)c2)c(Cl)c1                                |   |   | 1 |
| OC[C@@H](NC(=O)C(Cl)Cl)[C@H](O)c1ccc(cc1)N(=O)O                              |   |   | 0 |
| Cc1cnc2ccc3c(ncn3C)c2n1                                                      |   | 0 |   |
| O[C@@H]1O[C@@H]2[C@@H](O)C(=O)O[C@@H]2C1                                     |   |   | 0 |
| OC(=O)c1ccccc1C2=C3C=C(Br)C(=O)C(=O)C23                                      |   | 1 |   |
| CC(C)C1[C@H](O)C(=O)O                                                        | 0 | 0 |   |
| Clc1ccccc1C=C                                                                |   | 0 |   |
| CCN(CC)CCO                                                                   | 0 | 1 |   |
| CCOC(=O)CC1(C)OCC(C)O1                                                       |   |   | 0 |
| Fc1cc(F)c2cccnc2c1                                                           |   | 1 |   |
| OCc1c(O)cc2C(=O)c3ccccc3C(=O)c2c1O                                           |   | 1 |   |
| Cc1cc(Cc2cc(C)cc(c2O)C(C)(C)C)c(O)c(c1)O                                     |   | 0 | 1 |
| [O-][N+](=O)c1ccc2ccc3c(c4ccccc4c5ccc(O)C(=O)Cc1cc                           |   | 1 | 0 |
| C1CC[C@@H]2CCCC[C@H]2C1                                                      |   | 0 |   |
| O=Cc1c(ccccc1N(=O)=O)N(=O)=O                                                 |   | 1 |   |
| ClCC(Cl)(Cl)Cl                                                               |   | 0 | 0 |
| CC(C)[C@H](O)C(=O)O                                                          | 0 | 0 |   |

|                                             |   |   |   |   |   |
|---------------------------------------------|---|---|---|---|---|
| OC1=C(C(=O)                                 | 0 | 0 |   |   |   |
| Cc1cccc(Br)c1                               |   |   | 0 |   | 0 |
| OC[C@]1(O)OC[C@@H](O)[C@H](O)[C@@H]1O       |   |   |   |   | 0 |
| NC(=O)c1ccncc1                              |   |   |   |   | 0 |
| N1[C@@H]2[C@H]1c3c(c4ccccc24)c5cc           |   |   | 1 |   |   |
| COC(=O)c1ccc(c2c(NCCCN(C)C)c3ccccc3         |   |   | 1 |   |   |
| O=Nc1ccc(Sc2ccccc2)cc1                      |   |   | 1 |   |   |
| CC(=O)Nc1ccc(cc1)S(=O)(=O)Nc2cc(C)on2       |   |   |   |   | 0 |
| C1CC2OC2C1OC3CCC4OC34                       |   |   | 0 |   |   |
| COC(=O)C12OC1(C)C(C)(O)OC2=O                |   |   | 1 |   |   |
| Nc1ccc(NC(=O)c2ccc(N)cc2)cc1                |   |   |   |   | 1 |
| [O-][N+](=O)c1ccc(c2ccc(cc2[N+](=O)[C       |   |   | 1 |   |   |
| CN(C)CCNC(=O)c1cccn2cc(nc12)c3ccccc         |   |   | 1 |   |   |
| CC(C)CC(=O)OC1CC2(OC(=O)C)C(OC3C(C          |   |   | 0 |   |   |
| Cn1cnc(N=O)c1c2ccccc2                       |   |   | 1 |   |   |
| CC(C#C)N(C)C(=O)Nc1ccc(Cl)cc1               |   |   |   |   | 0 |
| CN(C)CCNC(=O)c1cccc2Oc3ccccc3Nc12           |   |   | 1 |   |   |
| NC(=O)c1ccccc1N                             |   |   |   |   | 0 |
| O=N(=O)c1ccccc1CC#N                         |   |   | 1 |   | 0 |
| CC1(O)CCC2C3CCC4CC(=O)\C(=C/O)\CC4          |   |   | 0 |   |   |
| O=C1Nc2ccccc2C3=NC(CN                       |   | 0 |   |   |   |
| OCCc1cn(N=O)c2ccccc12                       |   |   | 1 |   |   |
| NC(=O)[C@H                                  | 0 | 0 |   |   | 0 |
| ClC(=O)Cc1ccccc1                            |   |   | 1 |   |   |
| CC1=CC2OC3C(O)C(O)C(C)(C34CO4)C2(C          |   |   | 0 |   |   |
| N[S+](=O)([O-])c1cc2c(cc1                   |   | 0 |   |   |   |
| CC1=CN([C@                                  | 0 | 0 |   |   | 0 |
| CC(COc1ccccc1)N(CCCl)Cc2                    |   | 0 | 1 | 1 | 0 |
| CN(C)C(=S)[S-]                              |   |   |   |   | 0 |
| CN(C)C(=O)C                                 | 1 | 1 |   |   | 0 |
| O=C1Oc2cc(ccc2c3ccccc13)N(=O)=O             |   |   | 1 |   |   |
| OC1C=Cc2c(ccc3cc4c(cc23)C(O)C(O)c5cc        |   |   | 0 |   |   |
| CCNC(=O)N(CCCN(C)C)C(=O)[C@@H]1C[C@H]2[C@@C |   |   |   |   | 0 |
| O=N(=O)c1ccc2c3ccccc3c4ccc(c1c24)N(         |   |   | 1 |   |   |
| CCCc1c(O)c(c                                | 0 | 0 |   |   | 0 |
| C\C(=C(\OCCOc1ccc(Cl)cc1)/c2ccc(Cl)cc       |   |   | 0 |   |   |
| N\C(=N/OS(=O)(=O)O)\c1ccccc1                |   |   | 0 |   |   |
| C(=C\c1cccc(\C=C\c2ccccc2)c1)/c3ccccc       |   |   | 0 |   |   |
| C[C@H](N)[C                                 | 0 | 0 |   |   |   |
| NNC(=S)NN                                   |   |   |   |   | 0 |
| [O-][N+](=O)c1ccc2N(S\C(=N/C(=O)c3c         |   |   | 1 |   |   |
| CCc1cc(c2cc(cccc12)C(C)C)S(=O)(=O)[O-]      |   |   |   |   | 0 |
| C1CC=CCCC=CCCC=C1                           |   |   |   |   | 0 |



|                                                |   |   |   |   |
|------------------------------------------------|---|---|---|---|
| OC1C=Cc2c(ccc3ncccc23)C1O                      | 0 |   |   |   |
| ClC1cccc1                                      | 1 | 0 |   |   |
| COc1cccc1OCC(O)CO                              |   | 0 |   | 0 |
| Cc1cc(c(O)c(c1)N(=O)=O)N(=O)=O                 |   | 1 |   |   |
| CO[C@@H]1 0 0                                  |   |   |   |   |
| CC(C)CC(C)Nc1ccc(Nc2cccc2)cc1                  | 0 |   |   |   |
| O=C(Nc1cccc1)Nc2snc3cccc23                     | 0 |   |   |   |
| [O-][N+](=O)c1cccc2nsc12                       | 1 |   |   |   |
| [O-][N+](=O)C1=Cc2cc3cc4cccc4cc3c5c            | 1 |   |   |   |
| OC(=O)\C=C\c1cccc(c1)[N+](=O)[O-]              | 1 |   |   |   |
| COc1nsc2c(OCC3CO3)cccc12                       | 1 |   |   |   |
| CCCCOC(=O)C(C)OC(=O)CCC                        |   |   | 0 |   |
| CCCC(=O)[O-] 0 0                               |   |   | 0 |   |
| CCCCCCCCCCCCOCCO                               | 0 |   | 0 |   |
| CCNC(=O)Nc1ncc(s1)[N+](=O)[O-]                 | 1 |   |   |   |
| Nc1ccc(c2ccc(cc2N)[N+](=O)[O-])c(c1)[          | 1 |   |   |   |
| BrC(Br)Br                                      | 1 | 0 |   |   |
| O=N(=O)c1ccc2ccc3c(c4cccc4c5ccc1c2             | 1 |   |   |   |
| O=C1N=NNc2cccc12                               |   |   | 0 |   |
| OC(=O)CC1CC(=NO1)c2ccc 0                       |   |   |   |   |
| CO[C@H]1\C 0 0                                 |   |   |   |   |
| CCOC(=O)C 0 0                                  |   | 0 |   | 0 |
| NC(=O)c1cc(i 0 0                               |   |   | 1 |   |
| CCCN(Cc1cc 1 1                                 |   |   |   |   |
| Oc1ccc2ccc3ccc(c4c5cccc5c1c2c34)N(=            | 1 |   |   |   |
| C[C@@H]1CC2C3CCC4=CC(=O)C=C[C@]                | 0 |   |   |   |
| NNNNN 0                                        |   |   |   |   |
| CC1CCc2c1c(C)cc3c2ccc4cccc34                   | 1 |   |   |   |
| CCCN1CCCC 0 0                                  |   |   |   |   |
| c1ccc(nc1)c2ccncc2                             | 1 |   |   |   |
| Cc1noc(N[S+](=O)([O-])c2 0                     |   |   |   |   |
| C[N+]1(C)[C@H]2CC(C[C@@H]1[C@H]3O[C@@H]23      |   | 0 |   |   |
| O=C1N(CC2C 0 0                                 |   |   | 1 | 0 |
| CN1[C@@H] 1 1                                  |   |   |   |   |
| CO\N=C(\C(=O)N[C@H]1[C@H]2SCC(=C(N2C1=O)C(=    |   |   | 0 |   |
| CC1=CC(=O)C 0 0                                |   |   | 0 |   |
| CCCCC(=O)N(Cc1ccc(cc1)c2cccc2c3nnn[nH]3)[C@H]( |   |   | 0 |   |
| CO[C@H]1[C@H](O)CC(=O)O[C@H](C)CC=CC=C[C@H     |   |   | 0 |   |
| Nc1cccc1O 1                                    |   |   | 1 |   |
| COC(=O)c1cc 0 0                                |   |   | 0 |   |
| CN1C=CSC1=[N+]=Nc2c(c3cccc3)n(C)c4             | 1 |   |   |   |
| CC(C)C(C(=O)OC(C#N)c1cccc(Oc2cccc2             | 0 |   |   | 1 |
| ClC1C=CC2C1C3(Cl)C(=C(Cl)C2(Cl)C3(Cl)C         | 0 |   |   | 1 |

|                                               |   |   |   |
|-----------------------------------------------|---|---|---|
| CC(C)OC(=O)Cc1ccccc1                          | 0 | 0 | 0 |
| COP(=O)(OC)SC                                 | 0 |   |   |
| Cc1ccc2C(=O)c3ccccc3C(=O)c2c1O                | 1 |   |   |
| Cc1cc(C)c(CN2C3C2c4ccccc4c5ccccc35)c          | 1 |   |   |
| CCCCCCCCCCCC(=O)O                             | 0 |   | 0 |
| COc1cc(O)c2C(=O)c3c(O)cc(C)cc3C(=O)c          | 1 |   |   |
| CCc1nc(C)c[nH]1                               |   |   | 0 |
| Cc1ccc(\C=C\c2ccc(cc2)[N+](=O)[O-])cc         | 1 |   |   |
| NCCC#N                                        | 0 | 0 |   |
| NNS(=O)(=O)c1ccc(Oc2ccc(cc2)S(=O)(=O)NN)cc1   |   |   | 0 |
| NC(=O)CN1C                                    | 0 | 0 | 0 |
| NC(=O)C(=O)                                   | 0 | 0 |   |
| CCCN(CCC)c1c(cc(cc1N(=O)=O)S(=O)(=O)C)N(=O)=O |   |   | 0 |
| COc1nsc2ccccc(c12)N(=O)=O                     | 1 |   |   |
| O=N(=O)c1ccc2ccc3c4CCC=Cc4cc5ccc1c            | 1 |   |   |
| ClC1=C(Cl)C(=O)C(Cl)(Cl)C1=O                  | 0 |   |   |
| CC(=O)Nc1ccc(C)c(N)c1                         | 1 |   |   |
| Oc1ccc2c(Cc3cc(ccc23)[N+](=O)[O-])c1          | 1 |   |   |
| O=C(Nc1ccc(cc1)N(=O)=O)Nc2ccc(cc2)N(=O)=O     |   |   | 1 |
| C[C@@H]1CCc2c1cc(C)c3c2ccc4ccccc34            | 1 |   |   |
| CCN(CCCl)CCCNc1c2ccc(Cl)cc2nc3ccc(O           | 1 |   |   |
| CC1=CN(CC(O)CN=N#N)C(=O)NC1=O                 | 1 |   |   |
| [O-]c1ccccc1                                  | 0 | 0 | 1 |
| CC(C)NC(=O)N1CC(=O)N(C1=O)c2cc(Cl)cc(Cl)c2    |   |   | 0 |
| CC(=O)OC[C@H](O)CO                            |   |   | 1 |
| CCOc1cc(OC                                    | 0 | 0 |   |
| C[C@@H]1[C@@H](NC(=O)C)[C@@H](OC2[C@H](C      |   |   | 0 |
| Fc1cccc2ccc3ncccc3c12                         |   |   | 1 |
| C[C@@H](N                                     | 0 | 0 |   |
| CC(C)(CO)[C@@H](O)C(=O)NCCC(=O)[O-]           |   |   | 0 |
| NS(=O)(=O)c                                   | 0 |   | 0 |
| CCCN1C(=O)NC(=O)c2nc[nH]c12                   |   |   | 0 |
| CC(C)(C)NSc1nc2ccccc2s1                       |   |   | 1 |
| CC(=N)S                                       | 0 |   |   |
| CC(=O)C1C(=O)OC(=CC1=O)C                      | 0 |   | 0 |
| CC(=O)N(O)c1ccc(Oc2ccccc2)cc1                 | 1 |   |   |
| OP(=O)([O-])OP(=O)(O)[O-]                     |   |   | 0 |
| Cc1cccc(CCN2CCC(CC2)C(=                       |   | 0 |   |
| CCN(CC)CCO                                    | 1 |   |   |
| CCC[C@@H](C)C[C@H](OC(=O)C[C@@                | 0 |   |   |
| CC(C)(C)c1cc(CC(C)(C)C=O)                     |   | 0 |   |
| CC[N+](C)(C)                                  | 0 | 0 | 0 |
| CC(C)c1cc(Cl)                                 | 0 | 0 |   |

|                                                   |   |   |   |
|---------------------------------------------------|---|---|---|
| CN(C)c1ccc(cc1)N=Nc2cccc3ccccc23                  | 1 |   |   |
| COCCN(CCOC)c1cc(NC(=O)C)c(cc1OC)n2                | 1 |   |   |
| OC[C@@H](O)[C@H]1OC(=O)C(=C1O)O                   |   |   | 0 |
| Cc1cc2ncccc2c3nc(N=N#N)n(C)c13                    | 1 |   |   |
| CC(=O)Nc1ccc(cc1)c2ccc(N)cc2                      | 1 |   |   |
| CC(CCOC(=O)C)CC(C)(C)C                            |   |   | 0 |
| OC(=O)C(Br)(Br)Br                                 | 1 |   | 0 |
| C[NH+](C)CCC(c1ccccc1)c2                          | 0 |   | 0 |
| CC(=C)C(=O)OCC(C)(C)C                             | 0 |   |   |
| OC1c2ccccc2Oc3ccccc13                             | 1 |   |   |
| [O-][N+](=O)c1ccc2c3ccccc(c3cc(c2c1)[N            | 1 |   |   |
| C(N1CCN(CC1)c2nc3ccccc3                           | 0 |   |   |
| CC(=O)OCC(=O)[C@@]1(O)C(=C)CC2C3CCC4=CC(=O)C      |   |   | 0 |
| OC1C=Cc2ccc3c4ccccc4sc3c2C1O                      | 0 |   |   |
| CC(=O)NCC(O)COc1cccc2ccccc12                      | 0 |   |   |
| COC(=O)\C(=C\C)\C=C(/C)\C=C(/C)\C=C'              | 1 |   |   |
| O=C(C1OC1c2ccc(Oc3ccccc3)cc2)c4ccccc              | 0 |   |   |
| [O-][N+](=O)c1cc[n+](O)c2ccccc12                  | 1 |   |   |
| CC(=O)OC\C=C(/C)\C=C\C=C(/C)\C=C\C1               | 0 |   |   |
| CC(C)NC[C@                                        | 0 | 0 | 0 |
| NC(=O)Nc1nc2ccccc2[nH]1                           | 1 |   |   |
| Cl[C@@H]1[C@@H](Cl)[C@H](Cl)[C@@H](Cl)[C@H]       |   |   | 0 |
| Nc1nc(O)c2n                                       | 0 | 0 | 0 |
| Cc1ccccc1c2ccccc2                                 | 0 |   |   |
| CC[N+](CC)(CC)CC                                  | 0 |   |   |
| O=C1C=Cc2c(ccc3cc4ccccc4cc23)C1=O                 | 0 |   |   |
| Nc1nc(SCc2ccc(cc2)[N+](=                          | 0 |   |   |
| CC(C)COC(=O)C                                     |   |   | 0 |
| OCC(COC(=O)CCN1CC1)(COC(=O)CCN2CC2)COC(=O)C       |   |   | 0 |
| Cc1nc2ccc3c(nc(N)n3C)c2nc1C                       | 1 |   |   |
| CC(=O)Oc1cc                                       | 0 | 0 | 0 |
| NC(=O)C([C@                                       | 1 | 1 | 0 |
| Fc1ccccc(F)c1C(=O)NC(=O)Nc2ccc(Cl)cc2             | 0 |   | 0 |
| Oc1c(I)cc(Cl)c2cccnc12                            | 0 |   | 0 |
| O=C(\C=C\C)c1ccccc1)c2cccs                        | 0 |   |   |
| Cc1ccc2oc(CN(Cc3ccccc3)C(=O)Nc4c(F)cc(F)cc4F)c(c5 |   |   | 1 |
| O=C1NC2=C(CCC2)C(=O)N1C3CCCCC3                    | 0 |   |   |
| C[N+](C)CCc2cc3OCOC3c                             | 0 |   |   |
| N1C2C1c3c(ccc4ccccc34)c5ccccc25                   | 1 |   |   |
| O[C@@H]1C=Cc2c(ccc3c2ccc4ccc(O)cc3                | 1 |   |   |
| CC1(CO1)C2CO2                                     | 1 |   |   |
| CC1(C)CCC(C                                       | 0 | 0 | 0 |
| O=C(N1CCCCC1)c2ccc3OCC                            | 0 |   |   |

|                                         |   |   |   |
|-----------------------------------------|---|---|---|
| COc1ccc2C[C@@H]3C4CCCC[C@]4(CCN3C)c2c1  |   |   | 0 |
| Cc1ccc(\C=C\2/C3CCC(C)(C                | 0 |   |   |
| CCOC(=O)CS c1ccc2c3ccccc3C(=O)c4cccc    |   | 1 |   |
| CN(N=O)c1ccccc1                         |   | 1 | 0 |
| N[C@@H]1CCN(O)C1=O                      | 0 |   |   |
| OC1C2OC2c3c(cc4ccc5cccc6ccc3c4c56)(C    |   | 1 |   |
| COc1ccc(cc1OC)c2cc3ncc(                 | 0 |   |   |
| Oc1cc2cccc3ccc4c(ccc1c4c23)[N+](=O)[    |   | 1 |   |
| Fc1ccc2cccn2c1F                         |   | 1 |   |
| CC1=C(C=C)c:                            | 0 |   |   |
| C\C=C/1\CN2CC[C@@]34                    | 0 |   |   |
| Cc1cc2c3cc4ccccc4cc3c5cccc(c1)c25       |   | 1 |   |
| CC(=O)N(O)c1ccc2ccc3cccc4ccc1c2c34      |   | 1 |   |
| Brc1ccc(cc1)                            | 1 | 0 |   |
| Cc1ccc(c2ccccc12)[N+](=O)[O-]           |   | 1 |   |
| CO[C@H]1C(                              | 1 | 0 |   |
| CC(=O)CC(=O)OC(C)(C)C                   |   |   | 0 |
| CN(C)c1ccc(cc1)N=Nc2ccc3[nH]ncc3c2      |   | 1 |   |
| ClC(=O)c1ccccc1C(=O)Cl                  |   | 1 |   |
| OCCSCCO                                 | 0 | 0 | 0 |
| CCCC(C)C1(C(                            | 0 | 0 | 0 |
| Cc1ccc(cc1N=[N+](O-])c2cc(ccc2C)[N+]    |   | 0 |   |
| CC(=C)C(=O)O                            |   | 0 | 0 |
| NC(=Nc1nc(CSCC\C(=N)\[S                 | 0 |   |   |
| CS c1ccc2Sc3                            | 1 | 1 |   |
| CC1c2ccccc2c3c(C)cccc13                 |   | 1 |   |
| O1c2ccccc2Oc3ccccc13                    |   | 0 | 0 |
| COc1cc(OC)c(Cl)c(c1)N2C(=CC(=O)C(=C     |   | 0 |   |
| NCCCNCCCCN(CCCN)N(O)†                   | 0 | 1 |   |
| CN(C)C(=O)Nc1cccc(c1)C(F)(F)F           |   | 0 | 0 |
| CCCCCCCCCCCCCCCC(=O)OCC1=CC=C2          |   | 1 |   |
| Cc1cccc(c1[N+](=O)[O-])[N+](=O)[O-]     |   | 1 |   |
| Cc1ccc(cc1)S(=O)(=O)NC(=O)NN2CC3CCCC3C2 |   |   | 0 |
| C[N+](C)(C)CCOP(=O)([O-]                | 0 |   | 0 |
| CO[C@H]1CC                              | 0 | 0 |   |
| CCN(CC)CCO(                             | 1 |   |   |
| FC(F)C(F)(F)F                           |   | 0 |   |
| Oc1ccc2CC3†                             | 0 | 0 |   |
| CC\C=C/CCOC(=O)c1ccccc1O                |   |   | 0 |
| O=N(=O)c1ccc2ccc3cc4CCC=Cc4c5ccc1c:     |   | 1 |   |
| Cc1cc(O)nc(S)n1                         |   | 0 |   |
| c1ccc(cc1)c2ccccc2                      |   | 0 | 0 |
| O=C1c2ccccc2c3ccc4c5ccc6c7ccccc7C(=     |   | 1 |   |

|                                       |   |   |   |   |
|---------------------------------------|---|---|---|---|
| COc1nc(N)nc                           | 0 | 0 |   |   |
| OC[C@@H](O)[C@H](CO)OCn1ccnc1N(=O)=O  |   |   | 0 |   |
| CC(C)[C@H](CO)Nc1nc(Nc                | 0 |   |   |   |
| COc1ccc(c2N(Cc12)C(=O)                | 0 |   |   |   |
| CN(C)CCNC(=O)c1cccc2Oc3ccccc3Oc12     |   |   | 1 |   |
| C1CC(C2=NC(                           | 0 | 0 |   |   |
| C1CSCSC1                              |   |   | 1 |   |
| CC(C)CCC[C@                           | 0 | 0 |   |   |
| C(N(Cc1ncc[r                          | 1 |   |   |   |
| Nc1cc(ccc1Cl)C(F)(F)F                 |   |   | 0 |   |
| FCOC(C(F)(F)                          | 0 | 0 |   | 0 |
| [O-][N+](=O)c1ccc(\C=C\C(=O)c2ccc(cc: | 1 |   |   |   |
| N[C@@H](C                             | 0 | 0 |   | 0 |
| Oc1ccc2c(c1)c3cccc4c(ccc2c34)[N+](=O  | 1 |   |   |   |
| CC(N)C(=O)OC(C)(C)Cc1cc               | 1 |   |   | 1 |
| Cc1ccc2c(ccc3cc4ccccc4cc23)c1         | 1 |   |   |   |
| C1c2cccc3ccc4ccccc1c4c23              | 1 |   |   |   |
| CN(C)C1=NC(=O)N(C2CCCC2)C(=O)N1C      |   |   | 0 |   |
| NCCCCCNCCCCCN                         |   |   | 0 |   |
| O=Nc1cccc(c1)c2ccccc2                 | 1 |   |   |   |
| CO[C@@H]1                             | 0 | 0 |   |   |
| CCNC(C)Cc1ccc2OCOc2c1                 |   |   | 0 |   |
| Nc1cc2c3C=CC(O)C(O)c3ccc2c4ccccc14    | 1 |   |   |   |
| Cc1onc(O)c1C[C@H](N)C(-               | 0 |   |   |   |
| O=C1NC(=O)[C@H]2CC=CC[C@H]12          | 0 |   | 0 |   |
| C1C=Cc2c1ccc3c2ccc4ccccc34            | 1 |   |   |   |
| CCCCC(CC)CN1C(=O)C2C3CC(C=C3)C2C1=O   |   |   | 1 |   |
| CCCCN(N=O)C(=N)N[N+](=O)[O-]          | 1 |   |   |   |
| CN1CCc2cc3OCOc3c4c5ccccc5CC1c24       | 1 |   |   |   |
| C=CC1CCC=CC1                          | 0 |   |   |   |
| CCc1oc2cccc                           | 0 | 0 | 1 | 1 |
| OCCN(CCO)c1ccc(cc1)N=Nc2ccc(cc2C#N    | 1 |   |   |   |
| CCN1C(=O)N=C(c2cccc(Cl)               | 0 |   |   |   |
| O=C1CCCCCN1                           | 0 |   | 0 |   |
| CC1(C)SSCC(NC1=O)C(=O)O               | 0 |   |   |   |
| COC(=O)Cc1ccccc1                      |   |   | 0 |   |
| COP(=O)(O)OP(=O)(O)OC                 |   |   | 0 |   |
| CC(CN1c2ccccc2Sc3ccccc1:              | 1 | 0 |   |   |
| CC\C(=C(\CC)                          | 0 | 0 | 0 |   |
| OCc1c2ccccc2c3ccc4cccc5ccc1c3c45      | 1 |   |   |   |
| NCC[C@H](C                            | 0 | 0 | 0 | 0 |
| Nc1ccccc1N                            | 1 |   | 1 |   |
| CN1c2ccccc2C(=O)c3c(O)cc4OC(Cc4c13)   | 1 |   |   |   |

|                                              |   |   |   |   |
|----------------------------------------------|---|---|---|---|
| O=C1CC2CC1C3CCCC23                           |   |   |   | 0 |
| COc1cccc1N                                   | 1 | 1 |   |   |
| CC(CCl)OP(=O)(OC(C)CCl)OC(C)CCl              |   |   | 0 | 0 |
| NCCC[C@H](N)CC(=O)N[C@H]1CNC(=O)[C@@H](NC    |   |   |   | 0 |
| ClC1=C(CBr)COC1=O                            |   |   | 1 |   |
| FC(F)(Cl)C(F)(F)Cl                           |   |   | 0 |   |
| CO[C@]1(NC(=O)Cc2cccs2)[C@H]3SCC(=C(N3C1=O)C |   |   |   | 0 |
| Cc1ccc(\N=C\c2cccc3cccnc23)c(c1)C(=O         |   |   | 0 |   |
| C[C@@]12CC[C@H]3[C@H                         |   | 1 |   |   |
| CC[C@]12CC                                   | 0 | 0 |   | 0 |
| CCc1cccc(CC)c1NC(=O)CO                       |   |   | 1 |   |
| CNCCC(Oc1cc                                  | 1 | 1 |   | 0 |
| N[C@@H](C                                    | 0 | 0 |   |   |
| CN(N=O)C(=O)Oc1cccc2ccccc12                  |   |   | 1 |   |
| C[C@H]1C[C                                   | 0 | 0 |   |   |
| CCCCCCCCCCCCCCCCCCCCCCCCCO                   |   |   | 0 |   |
| OCc1ccc(cc1)[N+](=O)[O-]                     |   |   | 0 |   |
| OC1Cc2cc3ccc4cccc5ccc(c2C=C1)c3c45           |   |   | 1 |   |
| OC(=O)\C=C\Cl                                |   |   | 1 |   |
| CN1C2CCC1CC(C2)OC(c3cc                       |   | 1 |   |   |
| Cc1cc(ccc1N)c2ccc(N)c(C)c2                   |   |   | 1 | 0 |
| O=C1Oc2c(cccc2N(=O)=O)c3ccccc13              |   |   | 1 |   |
| COC(OC)(C(=O)c1cccc1)c2ccccc2                |   |   |   | 0 |
| O=C1Oc2cc3occc3c(OCCCC                       |   | 0 |   |   |
| C1Cc2ncccc2C3OC13                            |   |   | 0 |   |
| CN(C)c1ccc(cc1)N=Nc2cccnc2                   |   |   | 0 |   |
| CCCCCCC1CCC(=O)O1                            |   |   |   | 0 |
| Cc1ccc2cccc(c2c1)[N+](=O)[O-]                |   |   | 1 |   |
| COc1cc(Cl)ccc1Oc2ccc(Cl)cc2Cl                |   |   |   | 1 |
| Cc1sc2ccccc2c1CC3=NCCN                       |   | 0 |   |   |
| Fc1ccc2cc3c(cc2c1)c4cccc5cccc3c45            |   |   | 1 |   |
| CC(S)C(=O)N                                  | 0 | 0 | 0 | 0 |
| CC(=O)OCc1ccc2OCOc2c1                        |   |   | 0 | 0 |
| Clc1ccc(c(Cl)c1Cl)N(=O)=O                    |   |   |   | 0 |
| OC(=O)CCSCCC(=O)O                            |   |   |   | 0 |
| CCCCCCCCCCCC\C=C\[C@                         |   | 0 |   |   |
| CCCCCCCCCCCCn1cc[n+](C)c1                    |   |   |   | 1 |
| CC1(C)NC(=O)NC1=O                            |   |   |   | 0 |
| COc1cccc(\C=C\C)c1OC                         |   |   | 1 |   |
| CNC(=O)NOC(=O)NC                             |   |   | 1 |   |
| CC(=O)Nc1cc(ccc1C)N=[N+][[O-]]c2ccc(         |   |   | 0 |   |
| CCCCCCCCCOC(=O)c1cccc1C(=O)OCCCCCCCCC        |   |   |   | 0 |
| CN1CCc2cc(O)cc3c2[C@H]                       |   | 0 |   |   |

|                                                  |   |   |   |
|--------------------------------------------------|---|---|---|
| CC1=CC=CN2                                       | 0 | 0 |   |
| CC(=CCC\C(=C\COC=O)\C)C                          |   |   | 0 |
| NC[C@@H]1O[C@@H](C                               | 0 |   |   |
| CCOC(=O)COc1ccc2C(=O)C=C(Oc2c1)c3c               |   | 0 |   |
| Oc1ccc2c(c1)c3ccc4ccc5cccc6cc2c3c4c5             |   | 1 |   |
| COC(C(=O)O)c1cccc1                               |   |   | 0 |
| CC(C)CC(O)CC(C)C                                 |   |   | 0 |
| c1cc2ccc3cncc4ccc(c1)c2c34                       |   | 1 |   |
| CCCCNC(C)(C)P(=O)O                               |   |   | 0 |
| CCC1(C)CC(=C                                     | 0 | 0 | 0 |
| Cc1cccc2C3NC3c4cc5cccc5cc4c12                    |   | 1 |   |
| OC(=O)CNC(=O)CNC(=O)CNC(=O)CSC(=O)c1cccc1        |   |   | 0 |
| O[C@@H](CC[C@@H]1[C@H](N(C1=O)c2ccc(F)cc2)c      |   |   | 1 |
| C\C(=N/NC(=O)Nc1cc(F)cc(F)c1)\c2ncccc2C(=O)[O-]  |   |   | 0 |
| CCN(Cc1cccc(c1)S(=O)(=O)[O-])c2ccc(cc2)C(=C3C=CC |   |   | 0 |
| COc1ccc(CC2CO2)cc1OC                             |   | 1 |   |
| CCCC(=O)NC                                       | 0 |   |   |
| NC(=N)N\N=C\c1c(Cl)cccc1Cl                       |   |   | 0 |
| CC[C@]1(NC                                       | 0 | 0 | 0 |
| CC1(C)C2CCC                                      | 0 | 0 | 0 |
| OCCOc1cc(Cl)c(Cl)cc1Cl                           |   |   | 0 |
| O[C@H]1CCN2C[C@H](O)                             |   | 0 |   |
| COc1ccc2OC(=CC(=O)c2c1                           |   | 0 |   |
| CCCCCCC(C)Nc1ccc(Nc2cccc2)cc1                    |   |   | 1 |
| NCCCC(O)(P                                       | 0 | 0 |   |
| [O-][N+](=O)c1cccc1SSC(=C(Cl)Cl)F                |   |   | 1 |
| Oc1cnnc(O)n1                                     |   |   | 1 |
| CCCCOC(=O)[C@H](C)O                              |   |   | 0 |
| CC(C)C(C)(C)C(C)(C)C(C)(C)S                      |   |   | 0 |
| CN(CCC#N)c1ccc(cc1)N=Nc2cccc2                    |   |   | 1 |
| CNNCc1ccc(c                                      | 0 | 0 | 0 |
| C1CN=C(NC(                                       | 0 | 0 | 0 |
| O=C1CCc2ccc3c(ccc4cccc34)c12                     |   |   | 1 |
| [O-][N+](=O)c1cccc1CBr                           |   |   | 0 |
| CC(C)OC(=O)c1cccc1                               |   |   | 0 |
| O[C@@H]1CCCC[C@H]1N                              |   | 0 |   |
| [O-][N+](=O)c1ccc2oc3ccc(cc3c2c1)[N+             |   |   | 1 |
| Cc1cc2C(=O)CCCc2c3ccc4cccc4c13                   |   |   | 1 |
| CCCCOCCO                                         |   |   | 0 |
| COc1ccc(cc1                                      | 0 | 0 |   |
| CC(C)(O)c1coc(c1)S(=O)(=O)NC(=O)Nc2c3CCCC3cc4C   |   |   | 0 |
| Nc1ccc(cc1)[S+](=O)([O-])                        |   | 0 |   |
| O=C(n1ccnc1)n2ccnc2                              |   |   | 0 |

|                                            |   |   |
|--------------------------------------------|---|---|
| CCC(=O)N(O)c1ccc(\C=C\c2ccccc2)cc1         | 1 |   |
| CC(=O)c1cccn1                              |   | 0 |
| CN(C)CCC(c1ccccc1)c2cccc                   | 0 |   |
| Clc1c(Cl)c(Cl)c2c(Cl)c(Cl)c(Cl)c(Cl)c2c1Cl | 0 |   |
| OC1C=Cc2cc3c(ccc4ccccc34)c(Cl)c2C1O        | 0 |   |
| OC1C2OC2c3cc4c5ccccc5c6ccccc6c4cc3(        | 1 |   |
| CC(=O)CC(C1=C(O)c2ccccc2OC1=O)c3ccccc3     |   | 1 |
| COP(=S)(OC)SCC(=O)N(C)C=O                  | 0 |   |
| NC(CCC(=O)N                                | 0 | 0 |
| CC[N+](CC)(C                               | 0 | 0 |
| C1CCC=CC1                                  | 0 |   |
| Nc1c(Cl)c(Cl)c(Cl)c(Cl)c1Cl                |   | 0 |
| CC(O)COC(=O)C=C                            | 0 | 0 |
| OCCCCCl                                    | 1 |   |
| COc1ccc2nccc(C(O)C3CC4CCN3CC4C=C)c         | 0 |   |
| CCN(CC)CCC[                                | 1 | 1 |
| CC1(C)CCC2(CCC3(C)C(=CCC4C5(C)CC(O)        | 0 |   |
| NC(=S)Nc1ccccc1                            | 0 | 0 |
| CC(C)N(CCC(                                | 1 | 0 |
| CN(C)\C=N\c1c(I)cc(I)c(CCC(=O)[O-])c1I     |   | 0 |
| Oc1cc2cc(CCl                               | 1 | 0 |
| COC(=O)C(C)N(C(=O)Cc1ccccc1)c2c(C)cccc2C   |   | 0 |
| C[C@H]1Cc2c(Cl)cc(C(=O)N[C@H])(Cc3c        | 0 |   |
| Cc1cc(C(=O)O)c2ncccc2c1                    | 0 |   |
| COP(=O)(OC)Oc1ccc(cc1)N(=O)=O              |   | 0 |
| Nc1nc(Cl)nc2                               | 0 | 0 |
| CC12CCC3C(CCc4cc(O)ccc3                    | 1 |   |
| COc1cc(OC)c2C(=O)c3c(O)ccc(OC)c3Oc2        | 1 |   |
| CC1(C2CCC(C                                | 0 | 0 |
| Nc1cccc2cc3CCCCc3nc12                      | 1 |   |
| Clc1cc(Cl)cc(c1)N2C(=O)N3C[C@H](C[Cl       | 1 |   |
| CC(=C)C(=O)OCCCCCCCCCOCC(=O)C(=C)C         |   | 0 |
| CC(Br)C(Br)CCl                             | 1 |   |
| O=C1N(CC2CO2)Sc3ccccc13                    | 0 |   |
| NC(=O)C(Cl)(Cl)Cl                          |   | 0 |
| Oc1ccccc1Nc2ccc(cc2N(=O)=O)N(=O)=C         | 1 |   |
| N#N=Nc1ccc(Nc2c3ccccc3nc4ccccc24)c         | 1 |   |
| OCCc1c[nH]c2cc(ccc12)N(=O)=O               | 1 |   |
| OCc1cccn1                                  |   | 0 |
| C1CN=C(N1)C2COc3ccccc3                     | 0 | 1 |
| ONc1ccc(Sc2ccccc2)cc1                      | 1 |   |
| Cc1c(C)c(c(c1C)N(=O)=O)C(C)(C)N(=          | 0 |   |
| Oc1ccc(O)nn1                               | 0 |   |



|                                                  |   |   |   |
|--------------------------------------------------|---|---|---|
| OC(=NCCCl)Nc1ccc(s1)N(=O)=O                      | 1 |   |   |
| O=N(=O)c1cc(c2ccccc2c1)N(=O)=O                   | 1 |   |   |
| C[C@H](O)Cl                                      | 0 | 0 | 0 |
| [O-][N+](=O)c1oc2cc3ccc4cccc5ccc(c2c:            | 1 |   |   |
| COCCOC(=O)C1=C(C)NC(=O                           | 0 |   |   |
| N[S+](=O)([O-])c1cc(cc(N:                        | 0 |   |   |
| Cc1nc(N[S+](=O)([O-])c2c:                        | 0 |   |   |
| NS(=O)(=O)c                                      | 0 |   | 0 |
| CC(=O)c1oc(c(c2ccccc2)c1c3ccccc3)N(=O            | 1 |   |   |
| CS\C(=N/OC(=O)N(C)N=O)\C                         | 1 |   |   |
| CCCCCCN[S+](=O)([O-])c:                          | 0 |   |   |
| COC(=O)Nc1nc2ccc(cc2[nH]1)S(=O)c3ccccc3          |   |   | 0 |
| CC(C)CCOC(=O)CC(C)C                              | 0 | 0 | 0 |
| CC(COc1ccc(\C=C\c2ccccc2                         | 0 |   |   |
| C[N+](C)CCC(C1)OC(=O)C(O)(C2CCCC2)c3ccccc3       |   | 0 | 0 |
| COc1cc(C=C(i                                     | 0 |   |   |
| OC(=O)C1=CN(c2ccccc2C(=O)O)c3cc(Cl)c(Nc4c(F)cc(F |   | 0 |   |
| CC[N+](C)(C)                                     | 0 | 0 | 0 |
| BrC1CCC(Br)C(Br)CCC(Br)C(Br)CCC1Br               |   |   | 1 |
| CNCCCC12CC                                       | 1 | 1 |   |
| Cc1cc(c(N)c(N=Nc2ccc(cc2C)c3ccc(N=N              | 1 |   |   |
| Nc1n[nH]c(N)n1                                   | 0 |   |   |
| Nc1ccc2nc3ccccc3nc2c1                            | 1 |   |   |
| C[C@]12CCC                                       | 0 | 0 |   |
| Nc1ccc2Cc3ccccc3c2c1                             | 1 |   |   |
| CC(C)n1c(C=CC(O)CC(O)CC(=O)O)c(c2cc              | 0 |   |   |
| Cc1cccc(C)c1NC(=O)CC23C                          | 0 |   | 0 |
| CC(=O)NC1=NC(=O)N(C=C1)C2COC(COC(=O)c3ccccc3     |   |   | 0 |
| CCCC(=O)\N=C\1/SN(C(=O)CCC)c2ccc(cc              | 1 |   |   |
| BrCC(Br)(CCC#N)C#N                               | 0 |   |   |
| COc1ccc(N)c(C)c1                                 | 1 |   | 0 |
| CCCC1O[C@@H]2C[C@H]:                             | 0 |   |   |
| COc1ccc2ncc                                      | 1 | 1 |   |
| COc1ccc2[C@                                      | 0 | 0 | 0 |
| ClC(Cl)C(Cl)Cl                                   | 0 |   | 0 |
| CC(=O)\N=C\1/SN(C(=O)C)c2ccc(cc12)[              | 1 |   |   |
| COc1ccc2c(OC)c3CCOC3nc2c1OC                      | 1 |   |   |
| N[C@H](CC:                                       | 0 | 0 | 0 |
| OC1C(O)c2c(ccc3c2ccc4ccccc34)C5OC15              | 1 |   |   |
| CC(=O)Nc1cccc2ncccc12                            | 0 |   |   |
| CCCCCCCCCCCCCO                                   | 0 |   | 0 |
| COc1cccc(c1)C2=CC(=O)c3                          | 0 |   |   |
| CN1CCN(Cc2occ(c2)c3ccc4nc(O)oc4c3)[C@H](C1)c5cc  |   |   | 1 |

|                                                   |   |   |     |
|---------------------------------------------------|---|---|-----|
| CC(C)COC(=O)c1ccccc1                              |   |   | 0   |
| Cn1cc(C(=O)C(=O)N[C@H]                            | 0 |   |     |
| N[C@H](CCC(=O)N[C@H](CSc1ccc(cc1)[                |   | 1 |     |
| CCC(=O)OC1(CCN(C)CC1)c2ccccc2                     |   |   | 0   |
| NC1=NC(=O)                                        | 0 | 0 | 0   |
| CC(COC(=O)c1ccccc1)OC(=O)c2ccccc2                 |   |   | 0   |
| CC(CCC(=O)C                                       | 0 | 0 |     |
| CCC1OC(=O)C                                       | 0 | 0 |     |
| OC(=O)\C=C/C(=O)O                                 |   | 0 | 0   |
| OCCCNc1ccc                                        | 0 | 0 | 0   |
| Oc1ccc2CC3N(CC4CC4)CC[                            |   | 1 |     |
| Cc1ccc(O)c2r                                      | 0 | 0 | 0   |
| CCc1cc(Cc2cc(C)c(N)c(CC)c2)cc(C)c1N               |   | 0 |     |
| Cc1cccn2c1nc3c(C)c(cnc23)N(=O)=O                  |   | 1 |     |
| CN1CCC2(CCI                                       | 0 | 0 |     |
| CNC(=O)ON                                         |   | 1 |     |
| CC(N(C)C)c1ccccc1                                 |   | 0 |     |
| Oc1ccc(N=Nc2ccc(cc2)S(=O)(=O)O)c3cc               |   | 0 |     |
| Oc1ccc(CCNCCCCCNCCc2ccccc2)cc1O                   |   |   | 0   |
| CN(C)[C@@                                         | 0 | 0 |     |
| CCCN1CCc2c                                        | 1 | 0 |     |
| OC(=O)c1ccc                                       | 0 |   | 1 0 |
| O=N(=O)c1ccc2Cc3ccccc3c2c1                        |   | 1 |     |
| N\C(=N/C(=C                                       | 1 | 0 |     |
| CCN(CC)C(=O)\C(=C(\C)/OP(=O)(OC)OC                |   | 1 |     |
| Nc1nc(Cl)nc2c1ncn2[C@@                            |   | 0 |     |
| CC(N)(CN=[N+]=[N-])C(=O)O                         |   | 1 |     |
| CN(\C=N\C=N\c1ccc(C)cc1C)c2ccc(C)cc2              |   | 0 |     |
| CCCCCCCCCCCCOCC1CO1                               |   | 0 | 0   |
| Cc1cc(c(O)c(C)c1CN2C(=O)N(Cc3c(C)cc(c(O)c3C)C(C)( |   |   | 1   |
| COc1cc2CCNC(C)c2cc1OC                             |   | 0 |     |
| Fc1ccc(cc1)C(=O)CCCN2CCC(CC2)N3C(=S)Nc4ccccc34    |   |   | 0   |
| COc1cc(\C=C                                       | 0 | 0 |     |
| CC(F)(F)F                                         |   | 0 |     |
| C[N+]1(C)CCN(CC(O)(C2CCCC2)c3ccccc3)CC1           |   |   | 0   |
| CNc1ccccc1N                                       |   | 1 |     |
| CCOP(=S)(OCC)OC(Cl)C(Cl)(Cl)Cl                    |   |   | 1   |
| Brc1ccc(\C=C                                      |   | 1 |     |
| C1Cc2c(cc3ccc4cccc5ccc2c3c45)[C@@H                |   | 1 |     |
| O=C(Cc1ccccc1)OCc2ccccc2                          |   | 0 |     |
| Cc1nc(N)cc2[nH]c3ccccc3c12                        |   | 1 |     |
| ClC(Cl)(Cl)C#N                                    |   | 1 |     |
| CCCN(CCC)C(                                       | 0 | 0 | 0   |

|                                                    |   |   |   |
|----------------------------------------------------|---|---|---|
| CN(C)CCCN=C1c2ccccc2Nc3c(C)ccc(c13)                | 1 |   |   |
| CSC(C)(C)C(=O)NC(CS)C(=O)O                         | 0 |   |   |
| C[C@H](\C=C\C=C(\C)/[C@H]1C=CC(=O)O                | 0 |   | 0 |
| CC1CN(CCN1)C(=O)O                                  | 0 | 0 |   |
| N[S+](=O)([O-])c1cccc2c3c(N)ccc(O)c3C(=O)O         | 0 |   |   |
| CC=C1CC(=C)C(O)(CO)C(=O)OCC2=CCN3                  | 1 |   |   |
| Nc1ccc(O)c2C(=O)c3c(N)ccc(O)c3C(=O)O               | 1 |   |   |
| CCCCC(CC)COC(=O)c1ccc(O)cc1                        |   |   | 1 |
| OC(=O)c1cccc(c1)[N+](=O)[O-]                       | 1 |   |   |
| COc1ccc(cc1)C2C(=O)c3ccc(O)cc3                     | 0 |   | 0 |
| CCn1ccnc1CC2COc3ccccc3(C)C(=O)O                    | 0 |   | 0 |
| OCCOc1cccc(OCCO)c1                                 |   |   | 0 |
| ONc1cnc2c(c1)nc3cccn23                             | 1 |   |   |
| OC1=NC(Nc2ccccc12)c3ccc(s3)N(=O)=O                 | 1 |   |   |
| CCCCCCCCCCCCO                                      |   |   | 0 |
| CCCOC(=O)c1ccc(nc1)C(=O)OCCC                       |   |   | 0 |
| N[C@]1(CN[C@H](C1)C(=O)O)C(=O)O                    | 0 |   |   |
| CC(C)C1NC(=O)O                                     | 0 |   |   |
| CCOC(=O)c1ccc(O)cc1                                | 0 |   | 0 |
| CC(C)Oc1ccc(O)cc1                                  | 1 |   |   |
| O=N(=O)c1ccc2ccc3ccccc3c2c1                        | 1 |   |   |
| CCSc1cc(Cc2ccc(N)c(SCC)c2)ccc1N                    | 1 |   |   |
| OCC1CCC(CO)CC1                                     |   |   | 0 |
| CN1CCC(CC1)C(=O)O                                  | 1 | 0 |   |
| COc1cc2nc(nc1)C(=O)O                               | 0 | 0 | 0 |
| CC(=O)Nc1ccc(NC(=O)C)c2C(=O)c3ccccc3c2c1           | 1 |   |   |
| CC1=CN(C(=O)O)C(=O)O                               | 0 | 0 | 0 |
| CCCCCCCCCCCCC(=O)OCCS(=O)(=O)O                     | 0 |   |   |
| CCCCCCCCCCCCC(=O)OC1C(C)C2(O)C(C)C(=O)O            | 0 |   |   |
| CCCCC1c(O)noc1CC(N)C(=O)O                          | 0 |   |   |
| Fc1ccc(cc1)C(=O)[C@H]2O[C@@H]2c3c(N)ccc(cc3)C(=O)O | 1 |   |   |
| Nc1ccc(cc1)c2ccc(O)cc2                             | 0 | 0 |   |
| COC1(C[S+](O-))c2ccccc2                            | 1 |   |   |
| SCC(=O)OCCOC(=O)CS                                 |   |   | 0 |
| CN(C)C\C=C(')C(=O)O                                | 1 |   |   |
| CN(C)N                                             | 1 | 0 |   |
| C=CC(=O)OCCCCOC(=O)C=C                             | 0 | 0 |   |
| O=N(=O)c1c2CCc3cccc4ccc(c5ccccc15)c5ccccc1         | 1 |   |   |
| CCO[C@@H]1C[C@@H]2[C@@H](C)C(=O)O                  | 1 |   |   |
| C=CCOC(=O)\C=C/C(=O)OCC=C                          |   |   | 0 |
| CC(=CCC[C@H]1C=CC(=O)O)C(=O)O                      | 0 | 0 |   |
| COc1cc(OC)c2nc3occc3c(OC)c2c1                      | 1 |   |   |

|                                               |   |   |   |
|-----------------------------------------------|---|---|---|
| CC(C(=O)O)c1ccc(c(F)c1)c:                     | 0 | 0 | 0 |
| Cc1c2ccccc2cc3c4C=CC(=O)C(=O)c4ccc1           | 1 |   |   |
| OC(=NN=Cc1oc(cc1)N(=O)=O)C=Cc2oc(c            | 1 |   |   |
| Cc1ccc(Nc2n                                   | 0 | 0 |   |
| COc1cc2OC3OC=CC3c2c4OC(=O)C5=C(C              | 1 |   |   |
| OC(=O)COc1ccc(Cl)cc1                          | 0 |   | 0 |
| CC(=O)Oc1ccc2C(=CC(=O)Oc2c1)CBr               | 0 |   |   |
| OC[C@@H]1CO[C@@H](C(Cl)O)1                    | 1 |   |   |
| C[C@@H](C                                     | 0 | 0 |   |
| CCCCCCCCC(=O)\N=C\1/SN(C(=O)CCCC              | 1 |   |   |
| COCCc1ccc(C                                   | 0 | 0 | 0 |
| CC12CCCC(C)(C1CCC34CC(O)(CCC23)C(=            | 1 |   |   |
| COC=C                                         | 0 |   |   |
| CS(=O)(=O)c1cc(ccc1C(=O)c2cnoc2C3CC3)C(F)(F)F |   |   | 0 |
| OC(=O)CCCC                                    | 0 | 0 | 0 |
| O=C1NC(=O)c2cccc3cccc1c23                     |   |   | 1 |
| CCC(=O)Nc1snc2cccc12                          | 0 |   |   |
| CN1C(=O)N(C)c2nc([nH]c2                       | 0 |   |   |
| CCCCCCCCCCCCC=O                               |   |   | 0 |
| O1[C@@H]2C=Cc3c(cc4ccc5cccc6ccc3c4            | 1 |   |   |
| C[C@@H]1O[C@@H]1P(=O)([O-])[O-]               |   |   | 0 |
| O=N(=O)c1cc(c2cccc3c4cccc4c1c23)N(            | 1 |   |   |
| NC1=NC(=O)N(C=C1CCCl)C2CC(O)C(CO)             | 0 |   |   |
| CCCCCCCCCCCCCCCC(=O)C(                        | 0 |   |   |
| CN                                            |   |   | 0 |
| O=N(=O)c1cc2cccc3ccc4cccc1c4c23               | 1 |   |   |
| S=C=S                                         | 0 | 0 | 0 |
| CC\C=C\CCCCCCCCCO(=O)C                        |   |   | 0 |
| Cc1cc(Cl)ccc1OCC(=O)[O-]                      |   |   | 0 |
| CCN1\C=C\C                                    | 1 | 0 |   |
| Nc1ccc2c(oc3cccc23)c1                         | 1 |   |   |
| COc1cccc2C(=O)c3c(O)c4C[C@](O)(C[C@           | 0 |   |   |
| CC(C)(C)c1ccc(cc1)C(=O)ON(OCC2CCCC2           | 1 |   |   |
| COC(=O)Nc1ccc2[nH]cc(CC                       | 0 |   |   |
| Oc1ccc2c(c1)c3ccc(c4cccc2c34)[N+](=O          | 1 |   |   |
| CCN(CC)CCO                                    | 1 | 1 |   |
| [O-]S(=O)(=C                                  | 0 | 0 | 0 |
| CC[C@H](C)[C@H](NC(=O)                        | 0 |   |   |
| N#CC(=C(C#N)C#N)C#N                           | 0 |   |   |
| Cc1nc(N=Nc2                                   | 0 | 0 |   |
| CC(=O)Nc1ccc2c(Cc3cccc(O)c23)c1               | 1 |   |   |
| ClC1CO1                                       | 1 |   |   |
| NC(=O)Nc1ccc(Cl)c(Cl)c1                       |   |   | 1 |

|                                            |   |   |   |
|--------------------------------------------|---|---|---|
| Clc1ccc(C=O)cc1Cl                          | 0 |   |   |
| OCC(=O)[C@@H](O)[C@H](O)[C@@H](O)C(=O)[O-] |   |   | 0 |
| CN(COC(=O)C)N=O                            |   | 1 |   |
| OCC1(CO)CO                                 | 0 | 0 | 0 |
| CCCCCCCCCCCC[N+](C)(C)CCCS(=O)(=O)[O-]     |   |   | 0 |
| Clc1cccc(\C=N\C=N\c2cccc                   | 0 |   |   |
| COc1cc2CCN                                 | 0 | 0 |   |
| CC(C)c1ccccc1                              |   | 0 | 0 |
| CC(C)(c1ccc(OCC(O)CO)cc1)c2ccc(OCC(C       | 0 |   |   |
| CC(=O)[C@H]1CC[C@@H]2[C@@H]3CC             | 0 |   |   |
| CC(C)CC(=O)CC(C)C                          | 0 |   | 0 |
| CC(=O)Nc1ccc2c(Cc3cc(NC(=O)C)ccc23)        | 1 |   | 0 |
| C1CN=C(N1)c2oc3ccccc3c2                    | 0 |   |   |
| Cc1cc2CCN(C(=O)Nc3ccc(C                    | 0 |   |   |
| CC1(CO1)c2ccc(cc2)c3ccccc3                 |   | 1 |   |
| O=N(=O)c1cc(c2ccccc2)c(c1)N(=O)=O          |   | 1 |   |
| COC1=CC=C(C=CC1=O)[N+](=O)[O-]             |   | 1 |   |
| O=C1CC2(CCCC2)CC(=O)N1                     | 0 |   | 0 |
| Cn1c(nc2c3ccnc3ccc12)[N+](=O)[O-]          |   | 1 |   |
| c1ccc2c(c1)nc3ccc4cccc5ccc2c3c45           |   | 1 |   |
| CN(C)[C@H](Cc1ccccc1)c2ccccc2              |   |   | 0 |
| CCOC(=O)C=C                                |   | 0 | 0 |
| CC(=O)ON(C(=O)C)c1ccc(Sc2ccccc2)cc1        |   | 1 |   |
| Nc1c(Cl)cc(cc1Cl)[N+](=O)[O-]              |   | 1 |   |
| CCCCC1CCC(=O)O1                            |   |   | 0 |
| Cc1ccc(cc1C)                               | 0 | 0 | 0 |
| N\C(=N/OC1OC(C(O)C(O)C1O)C(=O)O)\          |   | 0 |   |
| CC(C)C1(C)N=C(NC1=O)c2ncccc2C(=O)O         |   |   | 0 |
| CNCCC(Oc1c                                 | 1 | 1 |   |
| Oc1cccc(c1)N(=O)=O                         |   | 1 | 1 |
| CC(=C)[C@H]1CC=C(C)C(=                     |   | 0 | 0 |
| N#CCSc1ccccc1                              |   |   | 0 |
| O=N(=O)c1cccc2cccc(c12)N(=O)=O             |   | 1 |   |
| CCN(CC)c1ccc(cc1)c2ccc(cc2)c3ccc(cc3)I     |   | 1 |   |
| Nc1nc(N)nc(                                | 0 | 0 | 0 |
| O=C1N(CC2CO2)Sc3cc(OCC4CO4)ccc13           |   | 1 |   |
| OCc1ccc(cc1N(=O)=O)N(=O)=O                 |   | 1 |   |
| NS(=O)(=O)c1ccccc1OC(F)(F)F                |   |   | 0 |
| CCCCNC(=O)[C@@H]1Cc2                       |   | 0 |   |
| Nc1[nH]cnc2ncnc12                          |   | 1 |   |
| NCCNCCNCCI                                 | 0 | 0 | 1 |
| C[C@@H]1[C                                 | 0 |   |   |
| CC(C)NCC1CCc2cc(CO)c(cc2N1)N(=O)=C         |   | 1 | 0 |

|                                            |   |   |   |
|--------------------------------------------|---|---|---|
| CC(=O)Nc1cc                                | 0 | 0 | 0 |
| COc1cccc2c1ccc3c(cc4OCOc4c23)C(=O)(        |   | 1 |   |
| CCOc1ccc(cc1)N(=O)=O                       |   | 1 | 1 |
| C1O[C@H]1c2ccccc2                          |   | 1 |   |
| CC(C)Oc1cc(N2N=C(OC2=O)C(C)(C)C)c(Cl)cc1Cl |   |   | 1 |
| CCCCNC(=O)N                                |   |   | 0 |
| NCCCCC(=O)(                                | 0 | 0 |   |
| Fc1ccc(cc1)C(=O)\C=C\c2ccccc2              |   | 0 |   |
| Oc1cc(O)c(Cl                               | 0 | 0 |   |
| CC(\C=C\c1c                                | 1 | 0 |   |
| Cc1ncc2CN=(                                | 0 | 0 |   |
| OC1OC(=O)C(=C1C(Br)Br)Cl                   |   | 1 |   |
| CCc1nnc(NS(                                | 0 |   |   |
| CC(C)(Br)C(=O)Nc1ccccc1                    |   | 0 |   |
| CNC(C)[C@@H](O)c1ccccc                     |   | 0 |   |
| OCc1ccc(cc1)C#N                            |   | 0 |   |
| OC(=O)C=C(C(Cl)Cl)C(Cl)Cl                  |   | 1 |   |
| COc1ccc(Br)c(C)c1                          |   |   | 0 |
| Clc1cccc2ccccc12                           |   | 1 | 0 |
| CCCCCCCCC1OC1CCCCCCCC(=O)OCC(CC)(          |   | 0 |   |
| C[C@@]12CC[C@@H](C1)C(C)(C)[C@@H]2O        |   |   | 0 |
| Oc1ccc(\C=Cl                               | 0 | 0 |   |
| CCN(CC)CC#C                                | 1 |   |   |
| COc1cc(SC)ccc1C(=O)N2C(                    |   | 0 |   |
| CC(=O)C(Cl)(Cl)Cl                          |   | 1 | 1 |
| Cc1ccc(NCCCl)cc1                           |   | 1 |   |
| ClCN1N=Nc2ccccc2C1=O                       |   |   | 0 |
| CCCC[P+](CCCC)(CCCC)CCCC                   |   |   | 0 |
| [O-][n+]1cccc2ccccc12                      |   | 0 |   |
| COP(=S)(OC)Oc1c(Cl)cc(C)cc1Cl              |   |   | 1 |
| COP(=S)(N)Oc1ccccc1C(=O)OC(C)C             |   |   | 0 |
| Cc1cccc(N)n1                               |   |   | 0 |
| OCC1OC(C(O)C1O)N2CC(=O)C(=N)NC2=           |   | 0 |   |
| CCCCN(COC(=O)C)N=O                         |   | 1 |   |
| CCCCCN(CCCCO)N=O                           |   | 1 |   |
| OC1C(Oc2cc(                                | 0 | 0 |   |
| [O-][N+](=O)c1ccc2c(Cc3ccccc23)[N+](       |   | 1 |   |
| O=C(Nc1ccccc1)C2CO2                        |   | 1 |   |
| Nc1ccc2c(O)cc(cc2c1)S(=O)(=O)O             |   |   | 1 |
| [O-][N+](=O)c1c2CCC=Cc2c3ccc4ccccc5c       |   | 0 |   |
| Nc1ncnc2c1ncn2[C@@H]z                      |   | 0 |   |
| c1ccc2c(c1)ccc3cc4c(ccc5ccncc45)cc23       |   | 1 |   |
| NC[C@@H]1O[C@H](O[C@H]2[C@@H](O)[C@H](O    |   |   | 0 |

|                                                 |   |   |   |   |
|-------------------------------------------------|---|---|---|---|
| CCOc1ccc(N)cc1N                                 |   |   | 1 |   |
| NC(=O)N1c2c                                     | 0 | 0 |   | 0 |
| OC1C=Cc2c(ccc3cc4c5C=CC(O)C(O)c5ccc             |   |   | 0 |   |
| OC1CCCN(C1)N=O                                  |   |   | 1 |   |
| COC(OC)OC                                       |   |   |   | 0 |
| CC1(OC(=CC1                                     | 0 | 0 |   | 0 |
| [O-][N+](=O)c1cccc(Cl)c1                        |   |   | 0 |   |
| CC(=O)OCc1ccc(cc1)[N+](=O)[O-]                  |   |   | 1 |   |
| Clc1cccc(c1Cl)N(=O)=O                           |   |   |   | 0 |
| Cc1ccc2ccccc2c1[N+](=O)[O-]                     |   |   | 1 |   |
| CC(CCC=C(C)C)CC(=O)O                            |   |   |   | 0 |
| OC(=O)c1cc(i                                    | 0 | 0 |   |   |
| COC1cc(cc(C(=O)NCC2CCCN2CC=C)c1OC)S(=O)(=O)N    |   |   |   | 0 |
| CCc1c(C)[nH]                                    | 0 | 0 |   |   |
| CCc1ccc(O)c(OC)c1                               |   |   |   | 0 |
| Nc1c(Cl)cc(cc1N(=O)=O)N(=O)=O                   |   |   | 1 |   |
| [O-]S(=O)(=O)c1ccc2N\C(=C/3\Nc4ccc(cc4C3=O)S(=C |   |   |   | 0 |
| Clc1cc(NC(=O)Nc2ccccc2)ccn1                     |   |   |   | 1 |
| CC(C)COC(=O)C(=C)C#N                            |   |   | 0 |   |
| O=N(=O)c1ccc2nc3c(cccc3nc2c1)N(=O):             |   |   | 1 |   |
| CCCC\C=C/CCCCCCCCC=O                            |   |   |   | 0 |
| O=C(N[C@H]1CN2CCC1CC2)c3ccc4OCCOc4c3            |   |   |   | 0 |
| O=Cc1c2ccccc2cc3ccccc13                         |   |   | 0 |   |
| NC(=N)c1ccc(cc1)c2cc3ccc(cc3s2)C(=N)            |   |   | 0 |   |
| [O-][N+](=O)c1ccccc1Nc2ccccc2                   |   |   | 0 |   |
| CC(=O)Nc1cccc(N=Nc2cccc(NC(=O)C)c2)             |   |   | 0 |   |
| Oc1cc2ccc3cccc4ccc(n1)c2c34                     |   |   | 1 |   |
| CCc1ccc(C)nc1                                   |   |   | 0 |   |
| C[C@@H]1O                                       | 0 | 0 |   | 0 |
| COc1ccccc1N2CCN(CCCCN                           |   | 1 |   |   |
| OP(=O)(O)O                                      | 0 | 0 |   | 0 |
| COc1ccc(NC(=O)c2csc(c2)N(=O)=O)cc1              |   |   | 1 |   |
| CC1(C)SC2C(I                                    | 0 | 0 |   |   |
| Oc1nsc2ccccc12                                  |   |   | 0 |   |
| CC(Cc1ccc(cc1)C(C)C)C=O                         |   |   |   | 0 |
| C[C@]12CC[C                                     | 0 | 0 |   | 0 |
| NC(CN=[N+]=[N-])C(=O)O                          |   |   | 1 |   |
| CC1CS(=O)(=O)CCN1N=Cc2oc(cc2)[N+](              |   |   | 1 |   |
| OCCCC(=O)[O-]                                   |   |   |   | 0 |
| Cn1c(N=N#N)nc2ccccc12                           |   |   | 1 |   |
| CC(=O)Nc1ccc(Oc2ccc(NO)cc2)cc1                  |   |   | 1 |   |
| CCN(CC)c1ccc2C(c3ccc(cc3Oc2c1)N(CC)(            |   |   | 1 |   |
| Oc1ccc(Cl)cc                                    | 0 | 0 | 1 |   |





|                                                                |   |   |   |   |
|----------------------------------------------------------------|---|---|---|---|
| <chem>Fc1ccc(cc1)C</chem>                                      | 1 | 1 |   | 0 |
| <chem>CC1(C)O[C@H]1</chem>                                     | 0 | 0 |   |   |
| <chem>Oc1ccc(Cl)cc1C(=O)Nc2ccc(cc2Cl)N(=O)=O</chem>            |   |   |   | 1 |
| <chem>CC12CCCC(C)(C1CCC34CC(=C)C(CCC23))(C</chem>              |   |   | 1 |   |
| <chem>C(=C)\c1ccncc</chem>                                     | 0 | 0 |   |   |
| <chem>O=C1CC2SCC=CN12</chem>                                   |   |   | 0 |   |
| <chem>CC(=O)SC1CC2=CC(=O)CC[C@@]1(C)C2</chem>                  |   | 0 |   |   |
| <chem>COC(C)CCOC(=O)C</chem>                                   |   |   | 0 |   |
| <chem>OC(=O)c1ccc(cc1C(=O)O)S(=O)(=O)O</chem>                  |   |   |   | 0 |
| <chem>Oc1ccc(cc1)C(=O)c2ccc(O)c(O)c2O</chem>                   |   |   |   | 1 |
| <chem>Clc1ccc(cc1)N(=O)=O</chem>                               |   |   |   | 0 |
| <chem>NC(=S)NCC=C</chem>                                       | 0 | 0 | 0 | 0 |
| <chem>O=CNc1ccc2c(Cc3ccccc23)c1</chem>                         |   |   | 1 |   |
| <chem>CC1C2Cc3ccc</chem>                                       | 0 |   |   |   |
| <chem>Clc1ccc(cc1Cl)N(=O)=O</chem>                             |   |   | 1 | 0 |
| <chem>CS(=O)(=O)OCCNCCCOS(=O)(=O)C</chem>                      |   |   | 1 | 0 |
| <chem>CCCCCCCCC</chem>                                         | 0 | 0 | 0 | 0 |
| <chem>CC(=O)NS(=O)(=O)c1ccc(N)cc1</chem>                       |   |   | 0 | 0 |
| <chem>CNc1ncnc2c1</chem>                                       | 0 | 0 |   |   |
| <chem>O[C@@H]1C=Cc2ccc3c(ccc4ccccc34)c2[C@@H]1</chem>          |   |   | 1 |   |
| <chem>ClCCN(CCCl)c1ccc2ccccc2c1</chem>                         |   |   | 1 |   |
| <chem>CCOP(=O)(OCC)Oc1cc(C)nc(n1)C(C)C</chem>                  |   |   | 1 | 0 |
| <chem>Nc1c(O)cc(Cc2cc(Cl)c(N)c(OS(=O)(=O)C</chem>              |   |   | 0 |   |
| <chem>ONc1ccc(cc1)N(=O)=O</chem>                               |   |   | 1 |   |
| <chem>NC(=O)NO</chem>                                          | 0 |   | 1 | 0 |
| <chem>c1ccc2cnccc2c1</chem>                                    |   |   | 0 | 0 |
| <chem>CC(CO)NC(=C</chem>                                       | 0 | 0 |   |   |
| <chem>NNC(=O)N</chem>                                          | 0 | 0 | 0 | 0 |
| <chem>CC(C)COC(=O)C=C</chem>                                   |   |   | 0 | 0 |
| <chem>FC(F)(F)Oc1ccc(NC(=O)NC(=O)c2ccccc2Cl)cc1</chem>         |   |   |   | 0 |
| <chem>C1CCC(CC1)N</chem>                                       | 0 | 0 | 0 | 0 |
| <chem>O[C@H]1[C@H](O)[C@@](O)(COP(=O)([O-])[O-])O[C@H]1</chem> |   |   |   | 0 |
| <chem>CC(=O)Nc1ccccc(C)c1</chem>                               |   |   | 0 | 0 |
| <chem>COc1cccc2OC(=CC(=O)c12</chem>                            |   | 0 |   |   |
| <chem>CN1CCC2(CC</chem>                                        | 1 | 1 |   |   |
| <chem>N1C2C1c3ccc4ccccc4c3c5ccccc25</chem>                     |   |   | 1 |   |
| <chem>Nc1c(c(nn1c</chem>                                       | 0 |   |   |   |
| <chem>CC(=O)O[C@H]([C@@H]1CO1)c2ccc3O</chem>                   |   |   | 1 |   |
| <chem>CCOC(=O)COc1cc(N2N=CC(=C(C)C2=O)C(F)(F)F)c(F)cc1</chem>  |   |   |   | 0 |
| <chem>Clc1cccc(Cl)c1NC2=NCCN2</chem>                           |   |   | 0 |   |
| <chem>COc1ccc2NC(=O)C3=C(OC</chem>                             |   | 0 |   |   |
| <chem>Nc1ccc(Cc2ccc(N)c(Cc3ccc(N)cc3)c2)cc1</chem>             |   |   | 1 |   |
| <chem>[O-][N+](=O)c1ccc(Sc2ccccc2)cc1</chem>                   |   |   | 1 |   |

|                                                |   |   |   |
|------------------------------------------------|---|---|---|
| CN1C(=O)N(                                     | 0 |   |   |
| CCCC(=O)[O-]                                   |   |   | 0 |
| Cc1cccn1                                       | 0 | 0 | 0 |
| C1OC1c2cccc2                                   |   | 1 | 0 |
| CCCCOc1ccc(OCCCN2CCOC                          | 0 |   |   |
| Oc1ccc2cc(ccc2c1)S(=O)(=O)[O-]                 |   |   | 0 |
| CNC(=N)NC(=O)Nc1c(C)cccc1C                     |   |   | 0 |
| CCCN(CCO)CCCC                                  |   | 0 |   |
| OC[C@@H](O)[C@H](O)[C@H](O)CO                  |   |   | 0 |
| CCOCC                                          |   | 0 |   |
| NCCNCCO                                        |   | 1 | 0 |
| COc1nc(C)nc(NC(=O)NS(=O)(=O)c2cccc2OCCCl)n1    |   |   | 0 |
| [O-][N+](=O)c1ccc2OC(=O)c3cccc3c2c:            |   | 1 |   |
| OC(=O)CNC:                                     | 0 | 0 | 0 |
| O=N(=O)c1c2cccc2c(c3cccc13)N(=O)=              |   | 0 |   |
| CCC1(C(=O)N                                    | 0 | 0 | 1 |
| C[C@]12C[C@H](O)[C@H]3[C@@H](C[C@H](F)C4=C     |   |   | 0 |
| CCC[C@H]1C                                     | 0 | 0 |   |
| OC(C#N)c1cccc1                                 |   | 0 | 0 |
| CCCOc1cc(N)                                    | 0 | 0 |   |
| Cc1ccc2cc3c4[C@H](O)[C@H](O)C=Cc4              |   | 1 |   |
| C[C@@H]1[C@H]2Cc3ccc(O)cc3[C@]1(C)CCN2C        |   |   | 0 |
| CCC(C)[C@H]1O[C@@]2(C[C@@H]3C[C@@H](CC=C       |   |   | 1 |
| CC1OCC(=O)C(=O)C1O                             |   | 1 |   |
| COc1cc2OC3OC=CC3c2c4OC(=O)C5=C(C               |   | 1 |   |
| CC[C@H]1NC                                     | 0 |   |   |
| CCOC(=O)[C                                     | 0 | 0 |   |
| OC1=CC(=O)C(=O)c2cccc12                        |   | 1 |   |
| O=N(=O)c1c2cccc2c3ccc4cccc5ccc1c3c             |   | 1 |   |
| C\C(=C(\Cl)/C(=O)O)\C=O                        |   | 1 |   |
| OC(=O)CCCC[C@@H]1SC(                           | 0 |   |   |
| OC(=O)C1OC1C(=O)O                              |   | 0 |   |
| Nc1ccc2cc(cc(O)c2c1N=Nc3ccc(cc3S(=C            |   | 0 |   |
| NS(=O)(=O)c                                    | 0 |   | 0 |
| OC[C@@H](O)[C@@H](O)[C@H](O)C=O                |   |   | 0 |
| OS(=O)(=O)c1ccc2nc([nH]c2c1)c3cccc3            |   |   | 0 |
| C\C(=C/C=C/                                    | 0 | 0 | 1 |
| CN1[C@H](C[C@@H](O)c:                          | 0 |   |   |
| CCCc1ccc(OC)cc1                                |   |   | 0 |
| CCCCCCCCCCCCc1ccc(O)cc1                        |   |   | 1 |
| COc1ccc2c(C(=O)c3ccc(Cl)cc3)c(C)n(CC(=O)O)c2c1 |   |   | 0 |
| OC1C(O)c2nc3ccc4cccc4c3cc2c5cccc1              |   | 0 |   |
| CC[C@]1(O)C[C@H](O)[C@@H]2C[C@H                |   | 1 |   |

|                                            |   |   |   |   |
|--------------------------------------------|---|---|---|---|
| COc1cccc(\C=N\C=N\c2ccc                    | 0 |   |   |   |
| CCN(CC)c1ccc2c(c3ccccc3C(=O)O)c4ccc(       | 1 |   |   |   |
| CNCCCC1c2ccccc2C=Cc3ccc                    | 1 |   |   | 0 |
| [O-][N+](=O)c1ccc2c(c1)c3ccc(c4cccc2c      | 1 |   |   |   |
| COc1ccccc1N                                | 1 | 1 |   | 0 |
| CC(C)C[C@H]                                | 0 | 0 |   |   |
| C[C@@H]1C[C@H]2[C@@H]3CCC4=CC(=O)C=C[C@]   |   |   | 0 |   |
| BrCC=C                                     | 1 |   | 0 |   |
| CN(C(=O)C1=                                | 0 | 0 |   | 0 |
| C[C@H]1C[C@H]2[C@@H]3CC[C@](O)(C(=O)CO)[C@ |   |   | 0 |   |
| C1COCCOc2ccccc2OCCOCCO1                    | 0 |   |   |   |
| Cc1occc1SSc2ccoc2C                         |   |   | 0 |   |
| Nc1cc(N)c(c2ccccc2)c(c1)[N+](=O)[O-]       | 1 |   |   |   |
| CCOC(=O)C1(                                | 1 |   | 1 | 0 |
| Cc1c(Cn2ccnc2)c3cc(ccc3n1Cc4ccccc4)[F      | 1 |   |   |   |
| CC[N+](CC)(C                               | 0 | 0 |   |   |
| C[C@@H](O)CCl                              | 1 |   |   |   |
| [O-]N(=O)=C1CCCC1                          | 1 |   |   |   |
| OC(CCCN1CCN(CC1)c2ncc(                     | 0 |   |   |   |
| COc1ccc2[nH                                | 0 |   |   |   |
| Cc1ccccc1C                                 | 0 |   | 0 |   |
| CC(OC(=O)C)c1ccccc1                        |   |   | 0 |   |
| O=C=S                                      | 1 |   |   |   |
| N[C@@H]([C@@H]1CC(=NO1)Cl)C(=O)O           |   |   | 0 |   |
| ON1c2ccccc2\C(=N/c3ccccc3)\C1(c4ccc        | 0 |   |   |   |
| CC1C=C(C=O)C(=CC2CC(C)(C)CC12)C=O          | 0 |   |   |   |
| c1ccccc1                                   | 0 |   |   |   |
| O=C=NC1CCC(CC2CCC(CC2)N=C=O)CC1            |   |   | 0 |   |
| CCOCN1C=C(F)C(=O)N(C(=O)c2cccc(c2)(        | 0 |   |   |   |
| CC(C)CCC[C@                                | 0 | 0 |   |   |
| CC(=O)CC(=O)Nc1ccc(C)cc1                   | 0 |   |   |   |
| CCOP(O)OCC                                 |   |   | 0 |   |
| COc1cccc2O(                                | 1 | 1 |   | 1 |
| NCC1OC(O[C                                 | 0 |   |   |   |
| NS(=O)(=O)c                                | 0 |   |   |   |
| C[C@H](N)Cc1c[nH]cn1                       | 0 |   |   |   |
| CC=C1CC(C)C(O)(CO)C(=O)OCC2=CC[N+]         | 0 |   |   |   |
| Nc1ccc2c3ccccc3c4cccc1c24                  | 1 |   |   |   |
| CCc1cccc2c3(                               | 0 | 0 |   | 0 |
| OCC1OC2C(OC3=NC(=N)C=CN23)C1O              | 0 |   |   |   |
| CC(O)CN(CCN                                | 0 | 0 |   | 0 |
| ClC(=O)c1ccccc1N(=O)=O                     | 1 |   |   | 0 |
| CCOC(=O)O(                                 | 0 | 0 |   |   |

|                                                  |   |   |   |
|--------------------------------------------------|---|---|---|
| NC(=N)NCCC                                       | 0 | 0 | 0 |
| CN1CCc2cc3OCOC3cc2C(=                            |   | 0 |   |
| ClCC(=C)Cl                                       |   |   | 1 |
| CCCCCN(CCCl                                      | 0 | 0 | 0 |
| [O-][N+](=O)c1ccc(\C=C\c2cccc(Cl)c2)c            |   |   | 1 |
| CC1CCCC(C)N1NC(=O)c2ccc(Cl)c(c2)S(=O)(=O)N       |   |   | 0 |
| CC(C)(C)CCCCC(=O)OC[C@H]1CO1                     |   |   | 1 |
| CCCCCCCC[C@H]1CO1                                |   |   | 0 |
| CCN(CC)c1ccc2nc3ccc(cc3[o+]c2c1)N(CC             |   |   | 1 |
| CC[C@H](CO                                       | 0 | 0 |   |
| COc1ccc(C(OC(=O)C)C=C)c2cccc12                   |   |   | 1 |
| CC(Cl)C(Cl)Cl                                    |   |   | 0 |
| COC(=O)C1=C(C)NC(=C(C1c2cccc2N(=C                | 0 |   | 1 |
| CCCCCCC(C)(                                      | 1 | 0 |   |
| CN1C(=O)N(C(=O)C=C1C(F)(F)F)c2ccc(Cl)c(c2)C(=O)C |   |   | 0 |
| C[C@@H]1CC=CC=CC=C[C@H](C[C@@H]2O[C@             |   |   | 0 |
| CC(=O)Nc1ccc2cccc2n1                             |   |   | 0 |
| OCCNc1ccc(cc1)N=Nc2ccc(NCCO)cc2                  |   |   | 1 |
| CN1C2CC(C                                        | 0 | 0 |   |
| Cc1c2cccc2nc3c1ccc4cccc34                        |   |   | 1 |
| Oc1cccc2c(O                                      | 0 | 0 |   |
| CC(=C1CCC(=CC1)C)C                               |   |   | 0 |
| O[C@]12C[C                                       | 0 | 0 |   |
| Nc1ccc(Cl)cc1N(=O)=O                             |   |   | 1 |
| CC(=O)OCC=Cc1cccc1                               |   |   | 0 |
| COC(=O)NS(=O)(=O)c1ccc(N)cc1                     |   |   | 0 |
| CC(C)OP(=O)(C)F                                  |   |   | 0 |
| Cn1c(ncc1[N+](=O)[O-])C(O)c2cc(cc(c2(            |   |   | 0 |
| CCCCOc1ccc(cc1)N=O                               |   |   | 1 |
| CCCNc1snc2cccc12                                 |   |   | 0 |
| CCN1C(=O)NC(C1=O)c2cccc2                         |   |   | 0 |
| CC(=O)NC(C(=O)O)C(C)(C):                         |   | 0 |   |
| CC(=O)c1ccc(cc1)[N+](=O)[O-]                     |   |   | 1 |
| CC(C)(C)NCC(O)COc1ccc(O)cc1C2CCCC2               |   |   | 0 |
| NC1CCCC1N                                        | 0 | 0 | 0 |
| CCN(CC)CC(=O)Nc1c(C)cc(                          |   | 0 | 0 |
| CN(C)C(=O)Nc1cccc(OC(=O)NC(C)(C)C)c1             |   |   | 0 |
| CS(=O)(=O)c1ccc(C(=O)C2C(=O)CCCC2=O)c(Cl)c1COCC  |   |   | 0 |
| CC(=C\C(=N\Nc1nccc2cccc12)\C)C                   |   |   | 1 |
| OC(CN=N#N)C(O)C(O)C(O)C=O                        |   |   | 1 |
| OCC1ccc(Cl)c                                     | 0 | 0 | 0 |
| Oc1cccc1N2                                       | 0 | 0 |   |
| Oc1ccc2c(ccc3c4cccc4ccc23)c1                     |   |   | 1 |

|                                               |   |   |   |
|-----------------------------------------------|---|---|---|
| Nc1c2ccccc2nc3ccccc13                         | 0 |   | 1 |
| CCN(CCCI)CCCNc1c2ccc(Cl)cc2nc3ccc(O           |   | 1 |   |
| COc1ccc2CC3N(CCC4cc5OC                        | 1 |   |   |
| CCCC(=O)OC                                    | 1 |   | 1 |
| CCC1(C(=O)N                                   | 0 | 0 | 0 |
| Nc1cc(Cl)ccc1Cl                               |   | 0 | 0 |
| CN(C)CCC[C@]1(OCc2cc(c                        | 0 |   |   |
| C[C@]12C[C@H](O)[C@H]3[C@@H](CCC4=CC(=O)C=    |   |   | 0 |
| CC(=O)OCC1-                                   | 0 | 0 | 0 |
| CCC(=O)N(C1CCN(CCc2cccs2)CC1)c3ccccc3         |   |   | 0 |
| COc1ccc2c(c:                                  | 0 | 0 | 0 |
| CCCCCNC(=O)N1C=C(F)C(                         | 0 | 0 | 0 |
| O=N(=O)c1ccc2ccc3c4c(ccc1c24)c5cccc           | 1 |   |   |
| OC(=O)[C@€                                    | 0 | 0 | 0 |
| Cc1c(NO)cc(cc1[N+](=O)[O-])[N+](=O)[          | 1 |   |   |
| Cc1ccc2c(Cc3cc(C)ccc23)c1                     |   | 0 |   |
| CC(=O)OCC1OC(Oc2cc(OC                         | 0 |   |   |
| C[C@]12Cc3cnoc3C=C1CC[                        | 0 |   | 0 |
| O=NN1CCC(=O)NC1=O                             |   | 1 |   |
| COc1cc(ccc1€                                  | 0 |   | 0 |
| CC1(C)[C@@                                    | 0 | 0 |   |
| C1CN(CCO1)p2(np(np(n2)(N3CC3)N4CC4)(N5CC5)N6€ |   |   | 0 |
| N#CCC#N                                       |   | 0 |   |
| CN(C)c1cccc(O)c1                              |   | 1 | 1 |
| [O-][N+](=O)c1ccc2N(S\C(=N/C(=O)c3c           | 1 |   |   |
| CN1C(=O)N(€                                   | 0 | 0 |   |
| Nc1cccc2Cc3ccccc3c12                          |   | 1 |   |
| CC(C)NCC(O)COc1ccccc1CC=C                     |   | 0 |   |
| COc1ccc(CNC(=O)C(C)Br)cc1                     |   | 1 |   |
| C[C@@H]1CC[C@H]2C(C)(C)[C@H]3C[C@@]12CC(=C    |   |   | 0 |
| CCOCCO                                        |   | 0 | 0 |
| NC(=N)N                                       |   | 0 | 0 |
| NC1=NC(=O)                                    | 0 | 0 | 0 |
| CC(C)CN(C[C@@H](O)[C@H](Cc1ccccc1)NC(=O)O[C@  |   |   | 0 |
| COc1cc(OC)c(cc1OC)C2OC2C                      |   | 1 |   |
| Cn1c(ncc1[N+](=O)[O-])C2NC(CO)(CO)C           |   | 1 |   |
| OC(=O)CCn1c2CC[C@H](C€                        | 0 |   |   |
| CC1(C)CC2C3(C)CC3(C=O)C(=CC2(O)C1)C           |   | 1 |   |
| CC(C)(C)NCC(O)c1ccc(O)c(CO)n1                 |   |   | 0 |
| Cc1cc(ccc1N-                                  | 0 | 0 |   |
| CP(=O)([O-])                                  | 0 | 0 |   |
| NS(=O)(=O)c                                   | 0 |   | 0 |
| O=C\C=C\C=C\C=C=O                             |   | 1 |   |

|                                              |   |   |   |   |
|----------------------------------------------|---|---|---|---|
| CC(C)(C)OC(=O)NN=Cc1c[n+][[O-]]c2ccc         | 1 |   |   |   |
| Nc1ccc(C=Cc2ccc(cc2)N(=O)=O)cc1              | 1 |   |   |   |
| CN(C)c1ccc(N(C)C)c2C(=O)c3c(O)ccc(O)         | 1 |   |   |   |
| Cc1c2ccccc2cc3ccc4C(=O)C(=O)C=Cc4c1          | 1 |   |   |   |
| CC(=O)Nc1cccc(N)c1                           | 1 |   |   | 0 |
| OC(=O)\C=C\c1ccc(Cn2ccn                      | 0 |   |   | 0 |
| NCC(C[S+](=O)(O)[O-])c1c                     | 0 |   |   |   |
| OC1C(O)c2cc3ccc4ccccc4c3cc2C5OC15            | 1 |   |   |   |
| CCSC(=N)N                                    | 0 | 0 |   |   |
| CC(C)(C)c1nnc(NS(=O)(=O)c2ccccc2)s1          |   |   |   | 1 |
| Clc1ccc(cc1)C(c2ccccc2Cl)C(Cl)(Cl)Cl         |   |   |   | 1 |
| COc1ccc(cc1OC2CCCC2)[C@@]3(CC[C@H](CC3)C(=O) |   |   |   | 0 |
| CC1OCCc2cc3c(cc12)C(C)(C)C(C)C3(C)C          | 0 |   |   |   |
| COc1ccc(cc1OC)S(=O)(=O)N2[C@H](C(=O)N3CCC[C@ |   |   |   | 0 |
| Clc1cc(Cl)cc(c1)N2C(=O)CCC2=O                | 0 |   |   |   |
| CCOC(=O)CC#N                                 |   |   |   | 0 |
| Cc1ccc(O)c(\                                 | 0 | 0 |   |   |
| ClCC(Br)CCl                                  |   |   | 1 |   |
| C\C=C(\CC[C@H](C)[C@H]1CC[C@H]2C3=CC[C@H]    |   |   |   | 0 |
| Clc1ccc(cc1)C#N                              |   |   |   | 0 |
| C[C@H]1OC[                                   | 0 |   |   |   |
| CC1CCc2c1c(C)c(C)c3c2ccc4ccccc34             | 1 |   |   |   |
| [O-][N+](=O)c1cnc2c(c1)nc3cccn23             | 1 |   |   |   |
| C(Oc1cccc2cnc12)C3CO3                        | 1 |   |   |   |
| Oc1cc(Cl)ccc1Cl                              | 0 |   |   | 1 |
| C[S+](=N)([O-])CC[C@H](\                     | 0 |   |   |   |
| CNc1ccc2ccc3ccc(O)cc3c2c1                    | 1 |   |   |   |
| CC(C)(C)N(CC(O)c1ccc(O)c(CO)c1)Cc2cc         | 1 |   |   |   |
| CC[C@@H](C)CCCC(=O)N[C@@H](CCNCS(=O)(=O)[    |   |   |   | 0 |
| CCN(CC)c1ccc(N)cc1                           | 1 |   |   | 1 |
| CC(=C)C1CCC2(C)OC2C1                         | 0 |   |   |   |
| Cc1ccccc1N=Nc2ccc(N)c(C)c2N                  | 1 |   |   |   |
| CCC1(CC)C(=O)NC(=NC1=O)[O-]                  |   |   |   | 0 |
| CCCC(C)C(O)CC                                |   |   |   | 0 |
| O=CN1CCCCC1                                  |   |   |   | 0 |
| CO[C@H]1C[C@H](O[C@H]2[C@H](C)[C@@H](O[C@    |   |   |   | 0 |
| CCCN(C\C=C\C\I)C1CCc2ccccc                   | 0 |   |   |   |
| CC(N)(Cc1ccc                                 | 0 | 0 |   | 0 |
| CC\C=C\C=C\C=C\C=C\C\OCC(O)CO                |   |   | 1 |   |
| CC(C)(C)Cn1nc(c2ccc(Cl)cc                    | 0 |   |   |   |
| CN(C)CCN(Cc                                  | 1 | 0 |   | 0 |
| COc1ccccc1CC(=N)N2C[C@                       | 0 |   |   |   |
| CC(C)C(=O)c1ccccc1                           |   |   |   | 0 |

|                                       |   |   |   |
|---------------------------------------|---|---|---|
| CNC1=C[N+](=C(c2ccccc2))              | 0 |   |   |
| OC1C(O)c2ccc3ccc4ccccc4c3c2C5OC15     |   | 1 |   |
| CCOC(C)(C)C                           |   | 0 |   |
| CC(C)[C@H](                           | 1 | 1 |   |
| C=CC(=O)N1CCN(CC1)c2ccccc2            |   | 0 |   |
| C[N+](=O)[O-]CCC(=CC1)c2ccccc2        |   | 0 |   |
| Cc1ccc(cc1N(=O)=O)N(=O)=O             | 1 |   | 0 |
| OC(=O)CC(=O)C(=O)O                    |   |   | 0 |
| Cc1onc(N)c1                           |   |   | 0 |
| Fc1cnc2ccc3cccnc3c2c1                 | 1 |   |   |
| CC[C@@]12O[C@]1(C(=O)OC)C(=O)N(C      | 1 |   |   |
| Nc1ccc(CCNc                           | 0 | 0 |   |
| OC(=O)[C@H]                           | 0 | 0 | 0 |
| CC(C)(C)C(O)C(Oc1ccc(Cl)cc1)n2cncn2   |   |   | 0 |
| [O-][N+](=O)                          | 0 | 0 | 0 |
| Cc1c(Cl)cnc2ccccc12                   |   | 0 |   |
| CC(C)CCCCCOC(=O)c1ccccc1C(=O)OCCC     | 0 |   | 0 |
| Nc1cccc(c1O)N(=O)=O                   | 0 |   |   |
| CCCCC                                 | 0 | 0 | 0 |
| Nc1snc2ccc(cc12)[N+](=O)[O-]          | 1 |   |   |
| C[C@H]1CCC                            | 0 | 0 |   |
| C[C@@H](O)c1ccccc1                    | 0 |   |   |
| COCCCN                                | 0 |   | 0 |
| NNc1nccc2ccncc12                      | 1 |   |   |
| Oc1ccc2ccccc2c1N(=O)=O                | 1 |   |   |
| Cc1cnc2c(n1)c(C)c(C)c3c2nc(N)n3C      | 1 |   |   |
| COc1c2[C@@H]3C=CO[C@H]3Oc2cc4O        | 1 |   |   |
| CCCC=[N+](O)[O-]                      | 0 |   |   |
| CCOCC1CO1                             | 1 |   |   |
| CIN1C(=O)CCC1=O                       |   |   | 0 |
| CC(=O)C1=C(O)[C@]2(C)C(               | 0 |   |   |
| O[C@@H](C                             | 0 | 0 | 0 |
| COc1cc(CC2CO2)ccc1O                   | 1 |   |   |
| Clc1cc(Cl)c(cc1Cl)N(=O)=O             |   |   | 0 |
| c1nnc[nH]1                            |   |   | 0 |
| N#CC1=Cc2cccc3cccc1c23                | 1 |   |   |
| COC(=O)[C@                            | 0 | 0 | 0 |
| [O-][N+](=O)c1cc2CCc3cccc4ccc(c1)c2c: | 1 |   |   |
| CC1C=Cc2c1ccc3c2ccc4ccccc34           | 1 |   |   |
| CC[C@@H](C)[C@H](C)CO                 | 0 |   |   |
| NC1c2ccccc2c3ccccc13                  | 0 |   |   |
| COc1cc2OCC3Oc4c5CC(Oc5ccc4C(=O)C3     | 0 |   |   |
| CCCCCCCCCCCC[N+](C)(C                 | 0 |   | 1 |

|                                                |   |   |   |
|------------------------------------------------|---|---|---|
| Cc1c2cccc2c(COS(=O)(=O)O)c3cccc13              |   | 1 |   |
| C[C@]12CCC                                     | 0 | 0 | 0 |
| COC(=O)Nc1                                     | 0 | 1 |   |
| CC[C@H]1OC(=O)[C@H](C)[C@@H](O[C@H]2C[C@H]2)C  |   |   | 0 |
| CCNc1nc(NC(C)CC)nc(OC)n1                       |   |   | 0 |
| Cc1cc(C)c2nc3c(ccc4cccc34)c(C)c2c1             |   | 1 |   |
| CC(=O)OCC(C                                    | 0 | 0 | 0 |
| NC12CC3CC(CC(C3)C1)C2                          |   | 0 | 0 |
| OC(=O)Cc1cc                                    | 0 | 0 | 0 |
| Cc1ccc2ncccc2c1                                |   | 1 | 0 |
| CC(C)CCCC(C)CCCC(C)CCCC                        |   | 0 | 0 |
| Oc1cc(F)ccc1c2oc\C=C\3/                        |   | 0 |   |
| Cn1c(N)nc2nc3cccc3cc12                         |   | 1 |   |
| O=C(OCC=Cc1cccc1)C=Cc2cccc2                    |   |   | 0 |
| CCCCN(CCCC)                                    | 1 | 1 |   |
| [O-][N+](=O)c1ccc2C(=O)OC(=O)c2c1              |   | 1 |   |
| O1OC2c3cccc3C1c4cccc24                         |   | 0 |   |
| OC(=N)C(=Cc1oc(cc1)N(=O)=O)c2occc2             |   | 1 |   |
| Cc1cc(N)ccc1N                                  |   | 1 |   |
| CC12CCC3C(CCc4cc(O)ccc34)C15CCC2(O             |   | 0 |   |
| CCCCCCCOC(=O)CCC                               |   |   | 0 |
| Oc1ccc2ccc3[nH]c4ccc5cccc5c4c3c2c1             |   | 1 |   |
| CCOc1ccc(cc1)[N+](=O)[O-]                      |   | 1 |   |
| CC(=O)NCc1c                                    | 0 | 0 | 0 |
| COc1cc(NS(=                                    | 0 |   | 0 |
| ON(C=O)c1ccc(cc1)N(=O)=O                       |   | 1 |   |
| CCCCC1Nc2cc(c(cc2S(=O)(=O)N1)S(=O)(=O)N)C(F)(F |   |   | 0 |
| OCCNc1ccc(cc1N(=O)=O)N(CCO)CCO                 |   | 1 |   |
| [O-][N+](=O)c1ccc2nc3cc(ccc3nc2c1)[N           |   | 1 |   |
| O=Nc1ccc2O                                     | 0 | 0 |   |
| OC1OC(=O)C(=C1CBr)Br                           |   | 1 |   |
| Cc1ccc(COS(=O)(=O)c2ccc(C)cc2)cc1              |   | 0 |   |
| CC(=O)O[C@H]1Cc2cccc2                          |   | 0 |   |
| CC(NC(C)(C)C)C(=O)c1cccc                       |   | 0 | 0 |
| O[C@@H]1C                                      | 0 | 0 |   |
| C\C(=C/c1cccc1)\C=C2SC(=S)N(CC(=O)O)C2=O       |   |   | 0 |
| Nc1nc(O)nc2c1ncn2C3OC(CO)C(O)C3O               |   | 0 |   |
| ClCc1cc2cccc3ccc4cc5cccc5c1c4c23               |   | 1 |   |
| COC(=O)c1cccc2Oc3c4[C@@H]5C=CO[C               |   | 1 |   |
| CSc1nc2cc(Cl                                   | 1 | 0 | 1 |
| Nc1ccc(Cl)c(Cl)c1                              |   | 0 | 0 |
| Nc1ccc(N=Nc2cccc2)c(N)c1                       |   | 1 | 1 |
| NC(=O)c1cc[                                    | 0 |   | 0 |



|                                                  |   |   |
|--------------------------------------------------|---|---|
| Oc1ccc(\C=C\C(=O)c2ccccc2)cc1                    | 0 |   |
| [O-][N+](=O)c1ccc(OCC2CO2)cc1                    | 1 |   |
| CN[C@@H]1                                        | 0 | 0 |
| CCOC(=O)c1[nH]c2ccccc2c1\N=C\c3ccc(              | 0 |   |
| CCCCCCCCCCCC(=O)OC                               |   | 0 |
| O=C1C=C2c3cc4ccccc4cc3c5cccc(C1=O)c              | 1 |   |
| CC(=O)OC(c1ccccc1)C(Cl)(Cl)Cl                    |   | 1 |
| O=N(=O)c1ccc(cc1)C#N                             | 0 |   |
| NC(Cc1c[nH]c2ccccc12)C(=                         | 0 |   |
| CC1CC(CC(C)(                                     | 0 | 0 |
| CCCCCCCCCCCC\C=C\[C@                             | 0 |   |
| C[C@@H]1C[C@H]2[C@@H]3CCC4=CC(=O)C=C[C@]         |   | 0 |
| CNc1ncnc2c1ncn2C3C[C@                            | 0 |   |
| COC(=O)c1c(C)cc(O)c(C)c1O                        |   | 1 |
| O=CC(=O)c1ccccc1                                 | 1 | 0 |
| COc1cc(NS(=                                      | 0 | 0 |
| N#Cc1cccc2ccnc12                                 | 1 |   |
| Cc1ccc2c(ccc3[nH]c4ccc5ccccc5c4c23)c1            | 1 |   |
| CN(C)CCOC(=O)c1ccc2c(c1                          | 1 |   |
| CC1=CCCC(=C)C2CC(C)(C)C2CC1                      | 0 |   |
| CCCCCCCCOc1ccc(cc1)C(=O)O                        | 0 | 1 |
| CCCC(CC)COC(=O)CC#N                              |   | 0 |
| CC(C)NCC(O)                                      | 0 | 0 |
| O=C1CC(=Nc2ccccc2)C(=O)c3ccccc13                 | 1 |   |
| Cc1ccccc1CCO                                     |   | 0 |
| CCN1C=C(C(=                                      | 0 | 0 |
| CCCC\C=C/C\C=C/CCCCCCCC(=O)NC(C)c1ccccc1         |   | 0 |
| CCCCCCCCCCCC(=O)OC                               |   | 0 |
| [O-][N+](=O)c1cnc(s1)N2CCN(C(=O)C(C              | 1 |   |
| CC(=O)Nc1ccc(Oc2ccc(cc2)N(O)C(=O)C)              | 1 |   |
| COc1ccc(C=Cc2ccc(cc2)N(=O)=O)cc1                 | 1 |   |
| CC1(C)C[C@H]2C=C(CO)[C@]3(C[C@@]                 | 1 |   |
| OC1C=Cc2c(ccc3c2ccc4ccccc34)C1O                  | 1 |   |
| OC(=O)c1ccc                                      | 0 | 0 |
| CCOC(=O)[C@@H](C)C[C@](C)(C[C@H]                 | 1 |   |
| CCCCCn1cc[n+](C)c1                               |   | 0 |
| O[C@@H](CNCCOc1ccc(CC(=O)O)cc1)c2ccccc2          |   | 0 |
| CCCC\C=C/C\C=C/CCCCCCCC(=O)OCC                   |   | 0 |
| Nc1nc2cc(ccc2[nH]1)C#N                           | 1 |   |
| COC(=O)c1ccc(l)cc1S(=O)(=O)[N-]C(=O)Nc2nc(C)nc(C |   | 0 |
| CC#CCOC(=O)                                      | 0 | 0 |
| OC1=NC(=O)                                       | 0 | 0 |
| CC(C)CCCCOC(=O)c1ccccc1C(=O)OCCCC                | 0 | 0 |

|                                                  |   |   |
|--------------------------------------------------|---|---|
| C[N+]1(CC2COC(O2)(C3CC                           | 0 | 0 |
| CC(=O)N[C@                                       | 0 | 0 |
| COc1cc(\C=C\C(=O)c2cccs                          | 0 |   |
| CN(C)CCCN=C1c2ccccc2Nc3ccccc(c13)N(              | 1 |   |
| Nc1ccc(cc1)S                                     | 0 | 0 |
| CC(N(CC1(O)CCC(O)C(O)C1O)N=O)C(=O                | 0 |   |
| CC(=O)Oc1cc(OC(=O)C)c2(                          | 0 |   |
| Nc1ncnc2c1r                                      | 0 |   |
| CCCC[C@H](CC)COC(=O)c1cccc(c1)C(=O               | 0 |   |
| ClCCN(CCCl)c1ccc2c(ccc3oc(cc23)N(=O)             | 1 |   |
| Cc1cc2c(O)cccc2c3cc4C(O)C(O)C=Cc4cc              | 1 |   |
| C[C@]1(O)CC                                      | 0 | 0 |
| N[C@@H](C                                        | 0 | 0 |
| CC(C)CCCCCOC(=O)CS                               |   | 0 |
| C(SCc1ccccc1)c2ccccc2                            | 0 |   |
| CCN(CC)CCCC                                      | 1 | 1 |
| COC1=C(Oc2cc(OC)c(OC(=                           | 0 |   |
| CCCN(CCC)c1c(cc(cc1N(=O)=O)C(F)(F)F)N(=O)=O      |   | 1 |
| CC(=C)C(=O)OCCCCCOC(=O)C(=C)C                    | 0 | 0 |
| CC(C)C1C2CCC(C2)C1N                              | 0 |   |
| CCOC(=O)C1OC1c2ccccc2                            | 0 | 0 |
| CC[C@H](Cc1                                      | 0 | 0 |
| CC[C@@H]1C=C(C)C[C@H](C)C[C@H](OC)[C@H]2O[       |   | 0 |
| COC(=O)C(C)Cl                                    |   | 1 |
| CN1C(=O)C=(                                      | 1 | 0 |
| Nc1ccc(cc1Cl)N(=O)=O                             |   | 1 |
| CC(=O)OC1CC2C3(C)CCCC(C)(C)C3CCC2(               | 0 |   |
| Cc1cccc(Nc2                                      | 0 | 0 |
| CN(C)c1ccncc1                                    | 0 | 0 |
| Nc1cccc2cns12                                    |   | 1 |
| NC[C@H]1O[C@H]([C@H]                             | 0 |   |
| CC(C)(C)OCO                                      |   | 0 |
| C\C=C(/Cl)\C1=CC(=O)C23CC2C(C)(C)OC              |   | 1 |
| COC[C@H]1OC(=O)c2coc3                            |   | 0 |
| CNC(=O)Oc1                                       | 0 | 0 |
| CN\C=N\c1ccc(C)cc1C                              |   | 0 |
| COc1cc(C)c(C=C\C(C=C\C(C=C\C(C(=O)O)\C)\C)c(C)c1 |   | 0 |
| CCCN(C(=N)N=NO)N(=O)=O                           |   | 1 |
| [O-][N+](=O)c1cccc(c1)C#N                        |   | 1 |
| O=N(=O)c1[nH]cnc1c2ccccc2                        |   | 1 |
| CO\N=C(/C(=                                      | 0 | 0 |
| COc1cc(ccc1N)N(=O)=O                             |   | 1 |
| BrCC(=C)Br                                       |   | 1 |

|                                                                                                                       |   |   |   |
|-----------------------------------------------------------------------------------------------------------------------|---|---|---|
| OCCCC(O)CO                                                                                                            |   |   | 0 |
| NC(C(=O)O)c1ccc(cc1)P(=O)(O)Nc1ccc(cc1)[S+](=O)([O-])                                                                 | 0 | 0 |   |
| CCN(CC)C(=O)c1cc(Cc2ccc(N)c(c2)C(=O)COc1ccc(NS(=O)(=O)c1cc(c2ccccc2c1)[N+](=O))CC[n+] <sub>1</sub> c2ccccc2nc3ccccc13 | 0 | 0 | 0 |
| CC[n+] <sub>1</sub> c2ccccc2nc3ccccc13                                                                                | 1 |   |   |
| CCCCC(CC)COC(=O)CCCCC(=O)O                                                                                            | 0 |   |   |
| OC(=O)C(=O)C(=O)O                                                                                                     | 0 |   |   |
| Cc1ccc(Cl)cc1N                                                                                                        | 0 |   |   |
| CCNS(=O)(=O)c1ccccc1C                                                                                                 | 1 |   |   |
| Oc1ccc(cc1)S                                                                                                          | 0 | 0 | 0 |
| CCOC1=CC(=O)C(=NC(=O)C)CC1=O                                                                                          | 1 |   |   |
| COc1ccc(cc1)N=O                                                                                                       | 1 |   |   |
| [O-][N+](=O)c1ccc2C=CCc2c1                                                                                            | 1 |   |   |
| CCC(C)COC(=O)C                                                                                                        |   |   | 0 |
| COc1cc(ccc1)C                                                                                                         | 0 | 0 |   |
| CC1(C)CC2C=C(CO)C3(CC3(C)C2C1)C=O                                                                                     | 1 |   |   |
| [O-][N+](=O)C1=Cc2ccc3ccc4cccc5cc1c2                                                                                  | 1 |   |   |
| COc1cc(O)c(cc1[S+](=O))(CNC1=Nc2c(nc1)C(=O)OC1C(CC(=O)N)C(=O)c1cc                                                     | 0 | 0 | 0 |
| OC1C(CC(=O)N)C(=O)c1cc                                                                                                | 0 | 0 |   |
| NNC(=O)c1cc                                                                                                           | 0 | 0 |   |
| OS(=O)(=O)c1ccc2ccc3cccc4ccc1c2c34                                                                                    | 1 |   |   |
| CC1N(CC2=NCCN2)Cc3cccc1                                                                                               | 0 |   |   |
| CN(CCO)C(=O)Nc1ccccc1                                                                                                 | 0 |   |   |
| O=C(ON(OCc1ccccc1)C(=O)c2ccccc2)c3c                                                                                   | 1 |   |   |
| OC(=O)c1cc(Br)cc2ccnc12                                                                                               | 0 |   |   |
| Cc1cc(O)c(cc1Sc2cc(c(O)cc2C)C(C)(C)Clc1ccc2N3C=NNC3=CN=C(c4ccccc4)c2c                                                 | 0 |   | 1 |
| Nc1c2C(=O)c                                                                                                           | 0 | 0 |   |
| [O-][N+](=O)c1ccccc1CC#N                                                                                              | 1 |   |   |
| CC1(C)NC(=O)C1                                                                                                        | 0 | 0 |   |
| ClC1=C(Cl)c2c                                                                                                         | 1 | 0 |   |
| NC(CCC(=O)NNc1ccc(CO)cc1)C(=O)O                                                                                       | 1 |   |   |
| CCCN(Cc1cc                                                                                                            | 1 | 0 |   |
| Cc1ccc(cc1C)C(OC(=O)NC2CCCC2)(C#C)                                                                                    | 1 |   |   |
| CNC1=Nc2ccc(Cl)cc2C(=[N+])([O-])C1)c3ccccc3                                                                           |   |   | 0 |
| CCCCCCCCC                                                                                                             | 1 | 0 | 1 |
| COc1ccc(cc1)C(=O)C                                                                                                    |   |   | 0 |
| Oc1c(Cl)c(Cl)cc(Cl)c1Cl                                                                                               | 0 |   | 1 |
| Cc1nccnc1C                                                                                                            | 0 |   |   |

|                                            |   |   |   |   |
|--------------------------------------------|---|---|---|---|
| CCCNCC(O)C                                 | 1 | 1 |   |   |
| CCN[C@@H]                                  | 0 |   |   |   |
| CC(C)C1NC(=                                | 0 | 0 |   |   |
| CC=CC(=O)O                                 |   |   |   | 0 |
| CC(C)CC(=O)C1C(=O)c2ccccc2C1=O             |   |   |   | 1 |
| CCOP(=O)(Oc1ccc(cc1)N(=O)=O)c2ccccc        |   |   | 1 |   |
| CC(=O)CC(=O)c1ccccc1                       |   |   |   | 0 |
| C(Oc1ccccc1Cc2ccccc2)C3CO3                 |   |   | 1 |   |
| Cc1c(C(=NCCO)O)n(=O)c2ccccc2n1=O           |   |   | 1 |   |
| CNC(=O)Oc1c                                | 0 | 0 | 1 | 1 |
| C[n+]1cc2c3OCOc3ccc2c4c                    |   | 0 |   |   |
| Nc1cc(nc(N)                                | 0 | 0 |   | 0 |
| OC1C2OC2c3c(ccc4c5ccccc5c6ccccc6c34        |   |   | 1 |   |
| COc1ccc2cc(ccc2c1)[C@H]                    |   | 0 |   | 0 |
| COc1ccc(CON(OC(=O)C)C(=O)c2ccccc2)c        |   |   | 1 |   |
| ClCC(=C)Br                                 |   |   | 1 |   |
| CN(CCCCCC                                  | 0 | 0 |   |   |
| c1ccc(cc1)N(c2ccccc2)c3ccccc3              |   |   | 0 |   |
| Clc1ccc(Cn:                                | 1 |   |   |   |
| COc1c2C3C=COC3Oc2cc4Oc5c(CCC(C)(C          |   |   | 1 |   |
| CCCCC1CCCC(=O)O1                           |   |   |   | 0 |
| Oc1cnc2ccccc2c1                            |   |   | 0 |   |
| CN1C(=O)NC(=O)c2c1ncn2                     |   | 0 | 0 | 0 |
| CCCOc1ccc(N)cc1N                           |   |   | 1 |   |
| CN(C)C(=O)C                                |   |   | 0 | 0 |
| CC[C@]12CC[C@H]3[C@@H](CCC4=C\C(=N\O)\CC[C |   |   |   | 1 |
| COc1ccc(cc1)C(c2ccc(OC)cc2)C(Cl)(Cl)Cl     |   |   | 0 | 1 |
| OCCN1CCN(C                                 | 1 |   | 0 |   |
| O=C1C(=O)c2                                | 0 | 0 |   |   |
| C[C@@H](O)CN(CC(=O)C)N=O                   |   |   | 1 |   |
| [O-][N+](=O)c1cc(cs1)C(=O)Nc2ccccc(F)c     |   |   | 1 |   |
| CC1=CCCC(=C)[C@H]2CC(C)(C)[C@@H]2CC1       |   |   |   | 0 |
| C(Oc1ccc2sncc2c1)[C@H]3CO3                 |   |   | 1 |   |
| CC(C)CP(=S)([S-])CC(C)C                    |   |   |   | 0 |
| OC(C=C)c1ccc2OCOc2c1                       |   |   | 0 |   |
| CC1c2ccccc2c3cc(C)c(C)cc13                 |   |   | 1 |   |
| COc1cc(ccc1O)C2=C(O)C(=O)c3c(O)cc(C        |   |   | 0 |   |
| Cc1ccc(cc1)\                               | 1 | 0 | 0 | 0 |
| CCC1OC(=O)C                                | 0 |   |   |   |
| CC=C1CC(=C)C(C)(O)C(=O)OCC2=CCN3C          |   |   | 1 |   |
| CC(C)CC1NC(=O)CNC1=O                       |   |   | 0 |   |
| COC(=O)c1oc(cc1)N(=O)=O                    |   |   | 1 |   |
| CC(=O)OCC(=                                | 0 | 0 |   |   |

|                                                  |   |   |   |
|--------------------------------------------------|---|---|---|
| Oc1c(cc(c2ccc(cc12)S(=O)(=O)O)[N+](=             | 1 |   |   |
| O=N(=O)c1cccc(c1)c2ccc(cc2N(=O)=O)N              | 1 |   |   |
| COc1ccc2C[C@@H]3[C@@H]4CC[C@@H](O)[C@@H          |   | 0 |   |
| CC(c1ccc(C)c(C)c1)c2ccc(C)c(C)c2                 |   | 0 |   |
| OC1=NC(=O)N(C1)N=CC=Cc2oc(cc2)N(=                | 1 |   |   |
| CC(=C)c1ccc(C)c2ccc(C=O)c2c1                     | 1 |   |   |
| CC(=C)C(=O)OCCOc1ccccc1                          |   | 0 |   |
| CC1=C(C)C(=O)C(=C(C)C1=O)C                       | 0 |   |   |
| O=N(=O)c1ccc2ccc3ccc(cc3c2c1)N(=O)=              | 1 |   |   |
| COc1cc(O)c2C(=O)C(=C(Oc2c1)c3ccc(O)              | 1 |   |   |
| Cn1c(N)nc2c3ncccc3ccc12                          | 1 |   |   |
| CNc1ccc(cc1[N+](=O)[O-])N(CCO)CCO                | 1 |   |   |
| CC(C)(C)C1CCC2(CC1)CO2                           | 0 |   |   |
| Cc1cccc(c1N(=O)=O)N(=O)=O                        | 1 |   |   |
| Oc1c(cc(c2ccc(cc12)S(=O)(=O)O)N(=O)=O)N(=O)=O    |   | 0 |   |
| [O-][N+](=O)c1ccc2c[nH]nc2c1                     | 1 |   |   |
| N[C@@H](C                                        | 0 | 0 |   |
| CCCCNCCCC                                        | 0 |   | 0 |
| c1ccc2scnc2c1                                    | 0 |   | 0 |
| CN1CCc2c(Cl                                      | 0 | 0 |   |
| C[C@]1(O)CC                                      | 0 |   | 0 |
| COc1cc2cc3N(C)CCc4cc(O                           | 0 |   |   |
| COC(=O)c1ccc(C=O)cc1                             | 0 |   | 0 |
| Nc1cc(cc(c1)[N+](=O)[O-])[N+](=O)[O-]            | 1 |   |   |
| OC(=O)O                                          | 0 |   |   |
| CO[C@H]1[C@@H](CC(=O)O[C@H](C)CC=CC=C[C@H        |   |   | 0 |
| OC(=O)CN1C(=O)N(Cc2ccc(Br)cc2F)C(=O)c3ccc(Cl)cc1 |   |   | 0 |
| NC(=O)Cl                                         | 0 | 0 | 0 |
| CCCN(C)(C)C                                      | 0 | 0 |   |
| CCCCON(OC(=O)C)C(=O)c1ccc(OC)cc1                 | 1 |   |   |
| CNC(=O)[C@H]1O[C@H]([C@H](O)[C@@H]1N)n2cn        |   |   | 0 |
| CC(=O)OCC(C                                      | 0 | 0 |   |
| CCOC(=O)CCl                                      | 0 |   | 0 |
| OC(=O)C=CC(=O)Nc1ccc(cc1)S(=O)(=O)Nc2nccs2       |   |   | 0 |
| O=C(NCc1cccnc1)Nc2ccc(cc2)N(=O)=O                |   |   | 1 |
| COC1=CC(=O)c2c([nH]cc3c4cnccc4nc23)              | 1 |   |   |
| CN(C)N=O                                         | 1 |   | 0 |
| CCC(CC)C(=O)O                                    |   |   | 0 |
| N[C@@H](CCC(=O)N[C@@H](CSC(=C(C                  | 1 |   |   |
| CC(C)(C)NCC(O)COc1cccc2                          | 0 |   |   |
| SC(=S)N1CCN                                      | 0 | 0 |   |
| CCC[C@@H]1C[C@H](N(C)C1)C(=O)N[C@H]([C@H](C      |   |   | 0 |
| CCCN1C(=O)N(CCC)c2[nH]                           | 0 |   |   |

|                                       |   |   |   |
|---------------------------------------|---|---|---|
| [O-][n+]1c2ccccc2nc3ccccc13           | 1 |   |   |
| CN(C)C(=O)c1nc2CN=C(c3ccccc3Cl)c4cc(  | 0 |   |   |
| CCCCO                                 | 1 |   |   |
| lc1ccc(CCNC(=N)SCCCc2c[i              | 1 |   |   |
| CC(=C)C(=O)OCCOC1CC2CC1C3C=CCC23      |   |   | 0 |
| CCN(Cc1cccc(c1)S(=O)(=O)O)c2ccccc2    |   |   | 0 |
| OCCOc1cc(O)c2C(=O)C(=C(Oc2c1)c3ccc(   | 0 |   |   |
| CCCCC(CC)COC(=O)c1ccc(C(=O)OCC(CC)(   | 0 |   | 0 |
| CC(CCC(=O)O)C(=O)O                    |   |   | 0 |
| CCCCC(CC)COC(=O)c1cccc(c1)C(=O)OCC(   | 0 |   |   |
| CCC(N)(C(=O)O)c1ccc(cc1)              | 0 |   |   |
| CC(C)(O)CCc1ccc(O)c2C(=O)c3c(O)c4c(C  | 1 |   |   |
| O[C@@H]1CCO[P@](=O)(N1)N(CCCl)C(      | 1 |   |   |
| CCCC[C@@H](CC)COP(=O)(OC[C@H](C(      | 0 |   |   |
| O1C2C=CC=CC12                         | 1 |   |   |
| [O-]Cl(=O)=O                          |   |   | 0 |
| CC(C)CN(N=O)C(=N)NN(=O)=O             | 1 |   |   |
| CC(C)C\C(=N\O)\C                      |   |   | 0 |
| [O-][N+](=O)c1ccc(\C=C\c2ccc(cc2)[N+] | 1 |   |   |
| NC(=O)NC(=O                           | 0 | 0 | 0 |
| OCC1OC(C(O)C1O)n2cnc3c(NCC(O)COc4     | 0 |   |   |
| c1ccc2c(c1)ccc3ccnc23                 | 1 |   |   |
| COc1cc2OC3OC4OC4C3c2c5oc(O)c6c(O)     | 1 |   |   |
| CCCCCOCC1CO1                          | 1 |   |   |
| c1ccc(cc1)C(=O                        | 1 | 0 | 0 |
| OC(=O)Cc1sc(nc1c2ccccc2)              | 0 |   |   |
| CC(C)(C)c1ccc(N)cc1                   |   |   | 0 |
| CCOC(=O)c1c                           | 1 | 0 |   |
| ONC(=O)c1ccc2ccccc2c1                 | 1 |   |   |
| CCCN1CN(C)C=C1                        |   |   | 0 |
| COP(=O)OC                             | 1 |   | 0 |
| Cc1cc2c3ccccc3[nH]c2nc1NO             | 1 |   |   |
| CCCCc1ccc(Cl)cc1                      |   |   | 0 |
| COc1ccc2[nH]cc(C3=CCNC(               | 0 |   |   |
| Cc1cccc2sc(N)nc12                     | 0 |   |   |
| Cc1c(C)c(N)c(cc1N)[N+](=O)[O-]        | 1 |   |   |
| CCCCCOCC(=O)CCCC                      |   |   | 0 |
| OC(=N)NN=Cc1oc(cc1)N(=O)=O            | 1 |   |   |
| C=CCN=C=S                             | 0 | 0 | 1 |
| BrCc1ccccc1N(=O)=O                    | 0 |   |   |
| CC(=O)OCc1c2ccccc2c(C)c3ccc4ccccc4c1  | 1 |   |   |
| COC(=O)C12OC1(C)C(OC2=O)C(C)C         | 1 |   |   |
| C[N+]1(C)CC(=O                        | 0 | 0 |   |

|                                                             |   |   |   |
|-------------------------------------------------------------|---|---|---|
| <chem>Fc1ccc(cc1)C(OCCN2CCN(C</chem>                        | 0 |   |   |
| <chem>Cc1ccc2c(cccc2c1)N(=O)=O</chem>                       |   | 1 |   |
| <chem>CCCOC(C(=O)OC1CCN(C)CC</chem>                         | 1 | 0 |   |
| <chem>Fc1cnc2c(ccc3ccccc23)c1</chem>                        |   | 0 |   |
| <chem>NS(=O)(=O)c1cc(ccc1Cl)C2(O)NC(=O)c3ccccc23</chem>     |   |   | 0 |
| <chem>Cc1ccc2cc3c(ccc4ccccc34)c5C(Cc1c25)O</chem>           |   | 1 |   |
| <chem>Clc1cccc2CN(Cc12)C3=NCC</chem>                        | 0 |   |   |
| <chem>ClCCSCCl</chem>                                       |   | 1 |   |
| <chem>COP(=O)(N)SC</chem>                                   |   |   | 0 |
| <chem>CN1CC(=O)N=C1NC(=O)Nc</chem>                          | 0 |   | 1 |
| <chem>CC(C)(Oc1ccc</chem>                                   | 0 | 0 | 0 |
| <chem>Nc1ccc2c3ccccc3[nH]c2c1N(=O)=O</chem>                 |   | 1 |   |
| <chem>C[C@H]1[C@@H]2[C@@H]</chem>                           | 0 |   |   |
| <chem>CC=C</chem>                                           |   | 1 |   |
| <chem>Cc1cc(C)c(N)cc1C</chem>                               |   | 1 | 0 |
| <chem>CC(C)(C)CCCCCOC(=O)c1ccccc1C(=O)OCCCCC(C)(C</chem>    |   |   | 0 |
| <chem>O=N(=O)c1ccc2ccc3c4ccccc4n(=O)c5ccc</chem>            |   | 1 |   |
| <chem>CC=CC1=C(N2[C@H](SC1)[C@H](NC(=O)[C@H](N)c3c</chem>   |   |   | 0 |
| <chem>CN(C)CCc1c[nH]c2cccc(O)c12</chem>                     |   |   | 0 |
| <chem>CCc1ccc2c3ccccc3c4cccc1c24</chem>                     |   | 0 |   |
| <chem>COc1cc2OC(=CC(=O)c2cc1</chem>                         | 0 |   |   |
| <chem>OC(=O)CCCC[C@@H]1SC[C@@H]2NC(=O)N[C@H]12</chem>       |   |   | 0 |
| <chem>COc1ccc2C[C@@H]3c4c(CC[N+]3(C)C)cc(OC)c(OC)c4(</chem> |   |   | 0 |
| <chem>Nc1cccc(c1)[N+](=O)[O-]</chem>                        |   | 1 |   |
| <chem>Cc1ccc(N)cc1[N+](=O)[O-]</chem>                       |   | 1 |   |
| <chem>BrCc1ccc2c3ccccc3c4cccc1c24</chem>                    |   | 1 |   |
| <chem>CCN(CC)CCO(</chem>                                    | 1 |   |   |
| <chem>OCc1c(O)c2C(=O)c3ccccc3C(=O)c2cc1O(</chem>            |   | 1 |   |
| <chem>COc1ccc2cc(ccc2c1)[C@H](C)CO</chem>                   |   |   | 0 |
| <chem>ClC(=C(Cl)C(=C(Cl)Cl)Cl)Cl</chem>                     |   | 0 | 0 |
| <chem>O=S1(=O)CC=CC1</chem>                                 |   | 0 | 0 |
| <chem>CCCCCCCCON(OC(=O)C)C(=O)c1ccccc1</chem>               |   | 1 |   |
| <chem>CC(C)(C)[N+](=O)[O-]</chem>                           |   | 0 |   |
| <chem>CCCc1cc(O)n</chem>                                    | 0 | 0 | 0 |
| <chem>Cc1ccc(C)c(O</chem>                                   | 0 | 0 | 0 |
| <chem>Clc1ccc2C(=C</chem>                                   | 1 | 1 |   |
| <chem>NC(CC(=O)O)C(=O)O</chem>                              |   | 0 |   |
| <chem>O=N(=O)c1ccc2sncc2c1</chem>                           |   | 1 |   |
| <chem>CCCCCCCCC=CCC1CC(=O)OC1=O</chem>                      |   | 0 |   |
| <chem>CC1=CC[C@H]2C[C@@H]1C2(C)C</chem>                     |   | 0 | 0 |
| <chem>Cc1ccccc2[nH]nnc12</chem>                             |   |   | 0 |
| <chem>Cc1cc(C)c(NC</chem>                                   | 0 | 0 | 0 |
| <chem>[O-][N+](=O)c1cccc(c1)C(F)(F)F</chem>                 |   | 0 |   |

|                                                 |   |   |   |   |
|-------------------------------------------------|---|---|---|---|
| NS(=O)(=O)c1cc2c(NC(CC3CCCC3)NS2(=O)=O)cc1Cl    |   |   |   | 0 |
| OC(=O)CCl                                       |   |   | 0 |   |
| COCCCOc1cc                                      | 0 |   |   | 0 |
| CC(=O)CCc1ccc2OCOc2c1                           |   |   |   | 0 |
| COc1c2ccoc2nc3cc4OCOc4cc13                      |   |   | 1 |   |
| CCCOCCO                                         |   |   |   | 0 |
| CN=C=O                                          |   |   | 0 |   |
| CN(C)CCCN1c                                     | 1 | 1 |   | 0 |
| Oc1ccc2c3ccccc3c4cc5ccccc5cc4c2c1               |   |   | 1 |   |
| CCOc1ccc2nc                                     | 0 | 0 | 1 | 1 |
| Nc1nc2ccccc2[nH]1                               |   |   | 0 | 0 |
| NCCN                                            | 0 | 0 | 1 | 0 |
| O[C@H]1C[C@](O)(C[C@@H](OC(=O))\                |   |   | 0 |   |
| COc1ccc2[C@                                     | 0 | 0 |   |   |
| COc1ccc(cc1OC)C(=CC(=O)N2CCOCC2)c3ccc(Cl)cc3    |   |   |   | 0 |
| N#CSCSc1nc2ccccc2s1                             |   |   |   | 1 |
| Clc1ccc(OCC(=O)OCCNC23                          |   | 0 |   |   |
| CC1(C)CC[C@@]2(CC[C@]                           |   | 1 |   |   |
| CCCCS                                           |   |   |   | 0 |
| CC(=O)OCC12OOC1(C)c3ccccc3O2                    |   |   | 1 |   |
| CC(=O)Nc1cc                                     | 0 | 0 | 0 | 0 |
| O[C@H]1CC[C@@]2(O)C3                            |   | 0 |   |   |
| CCN(CC)c1ccc(cc1)N=Nc2ccc(cc2)N(=O)             |   |   | 1 |   |
| CCCCCCCCC                                       | 0 | 0 |   |   |
| CC[C@@]1(O)C(=O)OCC2=C1C=C3N(Cc4cc5c(cccc5nc    |   |   |   | 1 |
| CC(C)[C@@H]1CC[C@H](CC1)C(=O)N[C@H](Cc2ccccc    |   |   |   | 0 |
| COc1ccc2[nH]c3c(C)cc(N)c(C)c3c2c1               |   |   | 1 |   |
| Oc1cc2c3ccccc3cc4ccc5cccc1c5c24                 |   |   | 1 |   |
| CN(C)c1ccc(cc1)N=Nc2ccccc2C(=O)O                |   |   | 1 |   |
| Brc1ccc(cc1N(=O)=O)N(=O)=O                      |   |   | 1 |   |
| CCCCCCCc1ccc(O)cc1                              |   |   |   | 1 |
| CC1C=C(C=O)C(=CC2(O)CC(C)(C)CC12)C=             |   |   | 1 |   |
| NC(CCC(=O)Nc1ccc(cc1)[N+](=O)[O-])C             |   |   | 0 |   |
| CC\C=C/CCOC(=O)C                                |   |   |   | 0 |
| CN(C)c1ccc(cc1)N=Nc2ccccc2COC(=O)C              |   |   | 1 |   |
| OC[C@H]1O[C@@H](Oc2cccc3[C@@H]([C@@H]4c5        |   |   |   | 0 |
| COC1=NN(C(=O)[N-]S(=O)(=O)c2ccccc2OC(F)(F)F)C(= |   |   |   | 0 |
| CCO[C@H](Cc1ccc(OCCc2ccc(OS(=O)(=O)C)cc2)cc1)C  |   |   |   | 0 |
| COc1cc(C)c(C                                    | 0 | 0 |   | 0 |
| CC(=O)OC(C)(C)CCCC(=C)C=C                       |   |   |   | 0 |
| CCn1c2ccccc2c3cc(N)ccc13                        |   |   | 1 | 1 |
| CON(C)C(=O)Nc1ccc(Br)cc1                        |   |   | 0 | 0 |
| Nc1ccc(N)c2C(=O)c3ccccc3C(=O)c12                |   |   | 1 | 1 |



|                                                |   |   |   |   |
|------------------------------------------------|---|---|---|---|
| COCC=O                                         |   |   | 1 |   |
| NCC[S+](O)[O-]                                 | 0 |   |   |   |
| CN1CC[C@@]23CCCC[C@@H]2[C@@H]1Cc4ccc(O)cc      |   |   |   | 0 |
| CC(=O)Nc1ccc(\C=C/c2ccccc2)cc1                 | 1 |   |   |   |
| NC1=NC(=O)C(=C(N1)c2ccccc2)Br                  |   |   |   | 0 |
| CO[C@]1(NC(=O)Cc2cccs2)[C@H]3SCC(=C(N3C1=O)C   |   |   |   | 0 |
| O=N(=O)c1ccc(c2ccc(cc2N(=O)=O)N(=C             | 1 |   |   |   |
| CC1CC2OC3C(O)CC(C)(C34CO4)C2(CO)C(             | 0 |   |   |   |
| OCC1CCC(COC=C)CC1                              |   |   |   | 0 |
| Nc1ccc(N2C(                                    | 0 | 0 |   |   |
| [O-][N+](=O)c1ccc(CCl)cc1                      |   |   | 1 |   |
| BrC1CCCC2cc3c(ccc4ccccc34)cc12                 |   |   | 1 |   |
| CC(COCC(C)OC(=O)c1ccccc1)OC(=O)c2ccccc2        |   |   |   | 0 |
| Cc1ccc2cc(ccc2c1)[N+](=O)[O-]                  |   |   | 1 |   |
| Oc1ccc(c1)C2=CC(=O)c3c                         | 0 |   |   |   |
| Fc1ccc2ccccc2n1                                |   |   | 0 |   |
| BrCCCCCBr                                      |   |   |   | 0 |
| o1ccc2cc3ccc4cccc5ccc(c12)c3c45                |   |   | 1 |   |
| NC1=Nc2[nH]cnc2C(=S)N1                         |   |   |   | 0 |
| CC(=O)C1(O)CC(O)c2c(O)c3C(=O)c4c(O)            | 1 |   |   |   |
| CC[C@@H](C)[C@H]1O[C                           | 0 |   |   |   |
| CCCCCCC(CO)CCCC                                |   |   |   | 0 |
| OC1N=C(c2c                                     | 0 | 0 | 0 | 0 |
| CCN1CCNC(=O)C1=O                               |   |   | 0 |   |
| COc1cc(Nc2c(cnc3cc(OCCCN4CCN(C)CC4)c(OC)cc23)C |   |   |   | 1 |
| Clc1cccc(n1)C(Cl)(Cl)Cl                        |   |   | 1 | 0 |
| CN(C)CCN(Cc1ccsc1)c2ccccc2                     |   |   | 0 |   |
| OC(=O)c1cc(                                    | 0 | 0 | 0 | 0 |
| O=C1C=CC(=O)C(=C1)c2ccccc2                     |   |   | 0 |   |
| COCCOC[C@H](CC1(CCCC1)C(=O)N[C@@H]2CC[C@@      |   |   |   | 0 |
| CC(C)NC(=O)C=C                                 |   |   |   | 0 |
| CCCCCCC(CCCC)COc1ccc(cc1)c2ccc(cc2)c           |   |   | 0 |   |
| CN1CC(=C[C@@H]2[C@H]1Cc3cn(CC=C                |   |   | 1 |   |
| Cc1c(C(=O)c2ccc3ccccc3c2                       |   |   | 0 |   |
| CN1[C@@H](CCC1=O)c2c                           |   |   | 0 | 0 |
| CC(C)C1CCC(                                    | 0 | 0 | 0 | 1 |
| COc1cc(ccc1N=Nc2ccc3c(c                        |   |   | 0 |   |
| Nc1ccc(N)c(c1)[N+](=O)[O-]                     |   |   | 1 |   |
| Oc1c(Br)cc(B                                   | 0 | 0 | 0 | 1 |
| COC(=O)C[C@H]1[C@@]2(C)[C@H](OC                |   |   | 0 |   |
| OC(=O)c1ccncc1                                 |   |   |   | 0 |
| CC[C@]12CC                                     | 1 | 0 |   |   |
| Cc1cc(CC(=O)O)c(C)n1c2cc                       |   |   | 0 |   |

|                                           |   |   |   |
|-------------------------------------------|---|---|---|
| OCNC(=O)CCI                               | 0 | 0 |   |
| [O-][N+](=O)c1cccc(COC(=O)c2ccccc2)c      | 0 |   |   |
| OC(CCN1CCCCC1)(C2CC3C                     | 1 |   | 0 |
| Oc1ccc(\C=C\C(=O)c2c(O)                   | 0 |   |   |
| Cc1cccc(C)c1                              | 0 | 0 | 0 |
| [O-][N+](=O)c1cc2cccc3ccc4cccc1c4c23      | 1 |   |   |
| CNc1ccc2nc(C)c(C)nc2c1C                   | 1 |   |   |
| Clc1cc2NC(=                               | 0 | 0 |   |
| CC(C)(Cc1c[n                              | 1 | 1 |   |
| Cc1onc(c1C(=                              | 0 | 0 |   |
| COc1ccc(\C=                               | 0 | 0 | 0 |
| CC(C)NCC(O)                               | 0 | 0 | 0 |
| CCCC(=O)NC                                | 0 | 1 |   |
| O=C1NC(=O)C2CC=CCC12                      | 0 |   | 0 |
| CC1CC(C)C(=O)C1=O                         |   |   | 0 |
| C1=Cc2cc3c4cccc4ccc3c5cccc1c25            | 1 |   |   |
| CNN(=O)=O                                 | 0 |   |   |
| Nc1cc(c(c2ccccc2)c(c1)[N+](=O)[O-])[N     | 1 |   |   |
| COC(=O)[C@@H]1CC[C@H](CC1)C(=O)OC         |   |   | 0 |
| CCCCCCCC=O                                | 0 |   | 0 |
| CN1CCC(=C2c3ccccc3CCc4cccnc24)CC1         |   |   | 0 |
| Nc1ccc(cc1)C(=C2C=CC(=N)C=C2)c3ccc(I      | 1 |   | 1 |
| CC(C)(C)c1cccc(c1O)C(C)(C)C               | 0 |   | 1 |
| CN([C@@H]:                                | 1 |   |   |
| CCN(CC)[C@                                | 1 | 0 |   |
| S=C=NCc1ccccc1                            |   |   | 1 |
| Oc1cc2cccc3ccc4c(ccc1c4c23)N(=O)=O        | 1 |   |   |
| CN(C)c1ccc2nc3cc(C)c(N)cc3nc2c1           | 1 |   |   |
| CCOC(=O)C=Cc1ccccc1                       |   |   | 0 |
| c1ccc2c(c1)cc3ccc4cccc5c6cccc6c2c3c4      | 1 |   |   |
| O=C1NC=Nc2[nH]cnc12                       |   |   | 0 |
| CCOC[C@@H](O)COc1ccc(NC(=O)CC[S+          | 0 |   |   |
| CCC(=O)OCc1ccc(OC)cc1                     |   |   | 0 |
| O=C(Oc1ccccc1)Oc2ccccc2                   |   |   | 0 |
| CCN1CCc2oc                                | 0 | 0 | 0 |
| Nc1ncc(s1)[N+](=O)[O-]                    | 1 |   |   |
| NCCCP(=O)(C                               | 0 | 0 |   |
| Oc1cccc2c3ccccc3c4cc5ccccc5cc4c12         | 0 |   |   |
| C[C@@H]1[C@@H]2Cc3ccc(O)cc3[C@@]1(C)CCN2C |   |   | 0 |
| CC(C)(c1ccc(OCC(O)CO)cc1)c2ccc(OCC3       | 1 |   |   |
| Nc1c(O)cccc1[N+](=O)[O-]                  | 0 |   |   |
| O=C(NCc1ccccc1)C2CO2                      | 1 |   |   |
| CC(C)CCCC(C)                              | 0 | 0 | 0 |

|                                               |   |   |   |   |
|-----------------------------------------------|---|---|---|---|
| CO\N=C(\C(=                                   | 0 | 0 |   |   |
| CC[C@H](C)C                                   | 0 | 0 |   | 0 |
| CN1CCN(CC1                                    | 0 | 0 |   | 0 |
| CCCC\C=C\C=C/C=C=O                            |   |   |   | 0 |
| OC1COC2C(COC12)O[N+](=O)[O-]                  |   |   | 0 |   |
| S=C1NC=Nc2[nH]cnc12                           |   |   |   | 0 |
| COc1ccc(NC(=O)\C=C\c2cc                       | 0 |   |   |   |
| O=C(OCc1ccc                                   | 0 | 0 |   | 0 |
| Cc1cc2ccccc2c3ccc4C(=O)CCc4c13                |   |   | 1 |   |
| O=C1\C=C/C/c                                  | 0 | 0 |   |   |
| NC(=O)c1ccc                                   | 0 | 0 | 0 | 0 |
| OC(=O)CCC(=                                   | 0 | 0 |   | 0 |
| CC(=O)Oc1c(OC(=O)C)c2c(ccc3c4ccccc4           |   |   | 1 |   |
| CC1CN(CC(C)                                   | 0 | 0 |   |   |
| Cc1ccc2NCCCc2c1                               |   |   |   | 0 |
| CC(O)Cn1c(C,                                  | 0 | 0 |   |   |
| CCCCOC(=O)[C@@H](C)Oc1ccc(Oc2ccc(cc2F)C#N)cc1 |   |   |   | 0 |
| C[C@H]1O[C@@H](Oc2cc(O)c3C(=O)c4              |   |   | 1 |   |
| COc1ccc2ccccc2c1                              |   |   |   | 0 |
| CC\C=C/CCO                                    |   |   |   | 0 |
| CC(C)[C@H](                                   | 0 | 0 |   |   |
| CCc1cnc(C(=O)O)c(c1)C(=O)O                    |   |   |   | 0 |
| [O-][N+](=O)c1cc2ccc3cc4ccccc4c5ccc(c         |   |   | 1 |   |
| CC1(C)SC2C(NC(=O)C(N)c3ccccc3)C(=O)           |   |   | 0 |   |
| OC1CCC2Cc3ccccc3N=C12                         |   | 0 |   |   |
| Nc1cc(ccc1C(=O)O)N(=O)=O                      |   |   | 1 | 1 |
| C=CC(=O)OCCC#N                                |   |   |   | 0 |
| Cc1cc(ccc1N)                                  | 0 | 0 | 1 | 1 |
| CCCCCCCCC                                     | 0 | 0 |   |   |
| [O-][N+](=O)c1ccc2[C@H]3O[C@H]3c4             |   |   | 1 |   |
| C1CCc2nncn2                                   | 0 | 0 |   | 0 |
| O=C(C=Cc1cccc(c1)N(=O)=O)c2ccccc2             |   |   | 0 |   |
| CCNN=NCC                                      |   |   | 1 |   |
| CCC1OC(=O)C[C@@H](O)[C@H](C)[C@@H](O[C@@      |   |   |   | 0 |
| C[C@@H](O)CN(C)c1ccc(NN)nn1                   |   |   | 1 |   |
| CCOC(=O)c1ccccc1OC                            |   |   |   | 0 |
| ClCc1ccccc1N(=O)=O                            |   |   | 1 | 0 |
| CN1CCCCC1C                                    | 0 | 0 |   | 0 |
| CC(O)C(C)O                                    |   |   | 0 | 0 |
| CCOc1ccc(NC                                   | 1 |   |   | 0 |
| OC(=O)CC=[N+](O)[O-]                          |   |   | 1 |   |
| CCc1c2ccccc2c(C)c3c1ccc4ccccc34               |   |   | 0 |   |
| O1C2C1c3nc4ccc5ccccc5c4cc3c6ccccc26           |   |   | 1 |   |

|                                               |   |   |   |
|-----------------------------------------------|---|---|---|
| Oc1ccc2c(c1)cc3ccc4cccc5ccc2c3c45             | 1 |   |   |
| CC(O)CC(=O)Nc1ccc(O)cc1                       | 0 |   |   |
| CSc1ccc(cc1[N+](=O)[O-])[N+](=O)[O-]          | 1 |   |   |
| O=N(=O)c1ccc(SC#N)c(c1)N(=O)=O                | 1 | 1 |   |
| Cc1nc2cccc2s1                                 | 0 | 0 |   |
| OC(CC(O)\C=                                   | 0 | 0 |   |
| CC(C)NCC(O)COc1cccc2[nH]c3cccc3c12            | 0 |   |   |
| CC12CCC3C(CCC4CC(CCC34C)OC(=O)\C=             | 1 |   |   |
| NC(=O)c1cccc1C(=O)N                           | 0 |   |   |
| Cc1cccc(N)c1N                                 | 1 | 1 |   |
| COc1c2OC(=O)C=Cc2c(OC)c3ccoc13                | 0 |   |   |
| CCCN(CC1CC1)c2nc(C)nc(N                       | 1 |   |   |
| NNc1nccc2ncccc12                              | 1 |   |   |
| C[C@H](CN1CCCC1)C(=O)c2ccc(cc2)C(F)(F)F       |   | 0 |   |
| O=C1c2cccc2c3c4OCOc4cc5ccnc1c35               | 1 |   |   |
| COc1nc(NC(C)C)nc(NC(C)C)n1                    |   | 0 |   |
| C1OC1c2cc3cccc3c4cccc24                       | 1 |   |   |
| CCOC(=O)COc1ccc2C(=C(CCN(CC)CC)C(=O)Oc2c1)C   |   | 0 |   |
| OC(C1CC1)(c2ccc(Cl)cc2)c3ccc(Cl)cc3           | 0 |   |   |
| Clc1ccc(CO[C@H](Cn2ccnc2)c3ccc(Cl)cc:         | 0 |   |   |
| Cl[C@@H]1CN(C[C@H]1Cl)N=O                     | 1 |   |   |
| Br\C(=C/c1cccc1)\C=O                          | 1 |   |   |
| CC(=O)NC(=C                                   | 0 | 0 | 0 |
| OC1CCC(O)(CN(N=O)C(C(=O)O)C(=O)O)             | 0 |   |   |
| COC1=CC(=O                                    | 0 | 0 | 0 |
| Cc1ccc(cc1)S(=O)(=O)Oc2ccc(cc2)N=Nc:          | 1 |   |   |
| CN(C)CCOc1c                                   | 1 | 1 |   |
| Nc1nc(O)c2ncn(C3CC(CO)C=C3)c2n1               | 0 |   |   |
| ON(N=O)c1cccc1                                | 1 |   |   |
| Cc1cc(ccc1N)[N+](=O)[O-]                      | 1 |   |   |
| OCCCN=N                                       | 1 |   |   |
| Cc1ccc2c(c1)c3cc4cccc4c5cc6cccc6c2c           | 1 |   |   |
| CN1CCCC(=C(                                   | 1 | 0 |   |
| CN\C(=C/N(=O)=O)\NCCSCc1oc(CN(C)C)cc1         |   |   | 0 |
| N#CCNCC#N                                     |   |   | 0 |
| CCN(CC)CCO(                                   | 1 | 0 | 0 |
| CN(C)CCCN1C=CN(C)C1\C=N\O                     | 0 |   |   |
| CCCC(CC)COP(OCC(CC)CCCC)OCC(CC)CC             | 0 |   |   |
| Clc1ccc(Sc2cc(Cl)c(Cl)cc2Cl)cc1               |   |   | 1 |
| CCCCCCCCOC(=O)c1ccc(C(=O)OCCCCCCC)c(c1)C(=O)C |   |   | 0 |
| OCC1OC(CC1O)N2C=C(C=O)C(=O)NC2=C              | 0 |   |   |
| O=N(=O)c1ccc(c2cccc2N(=O)=O)c(c1)N            | 1 |   |   |
| CCC(=O)OCC(=O)[C@@]1(OC(=O)CC)[C@H](C)C[C@H   |   |   | 0 |

|                                              |   |   |   |
|----------------------------------------------|---|---|---|
| OC1C2OC2c3c(ccc4c3ccc5ccc(O)cc45)C1          | 1 |   |   |
| CN1CC[C@H]                                   | 1 | 1 |   |
| COC(=O)Nc1nc2ccc(cc2[nH]1)C(=O)c3ccccc3      |   |   | 1 |
| OC1C2OC2c3c(ccc4nc5ccc6ccccc6c5cc34          | 1 |   |   |
| Nc1ccc2cc(cc(O)c2c1N=Nc3ccc(cc3S(=C          | 0 |   |   |
| N[C@@H](C                                    | 0 | 0 | 0 |
| COc1ccc(Nc2c3ccccc3nc4ccccc24)cc1            | 1 |   |   |
| Cc1cc(O)c2C(=O)c3c(O)c(O)c(O)cc3C(=C         | 0 |   |   |
| CCc1c(O)ccc2c3CCO[C@@](CC)(CC(=O)(           | 1 |   |   |
| CC[S+](=O)([O-])N(C)[C@                      | 0 |   |   |
| CC1[C@@H]                                    | 0 | 0 |   |
| O[C@H]1C=Cc2c(ccc3c4cccc5ccc(c23)c           | 1 |   |   |
| CCCCCCCCOc1ccccc1NC(=O)OCCN2CCCC             | 0 |   |   |
| CC(C)(C)OC(=O)\C=C\c1oc(cc1)[N+](=O)         | 1 |   |   |
| CC1=Nc2ccc3ccccc3c2C1(C)C                    |   |   | 1 |
| OC(=O)COc1ccc(cc1)N(CCCl)CCCl                | 1 |   |   |
| CCCC\C=C/C\C=C/C\C=C/                        | 0 |   |   |
| CC(=O)Nc1ccc(cc1)S(=O)(=O)Nc2ccc(cc2)N(=O)=O |   |   | 1 |
| C[N+](C)(C)C                                 | 0 | 0 | 0 |
| CCCCCCCCCCCC(=O)OCC(C)OC(=O)CCCC(=O)O        |   |   | 0 |
| CCCC[C@@H](CC)CNC[C@H](CC)CCCC               | 0 |   |   |
| CC(C)(C)NCC(O)COc1cccc2CC(O)C(O)Cc1          | 0 |   |   |
| CC(=CC1C(C(=O)O)C1(C)C)C                     | 0 |   |   |
| CNCC(O)c1ccc(O)c(O)c1                        |   | 0 |   |
| CC(=O)Oc1ccccc1C(=O)Nc2ncc(s2)N(=O)=O        |   |   | 1 |
| CCCCBr                                       | 1 |   | 0 |
| Clc1ccc(cc1)(                                | 0 | 0 | 0 |
| CC1(C)SC(C)(C)SC(C)(C)S1                     |   |   | 0 |
| COc1cc2nc(n                                  | 0 | 0 |   |
| Oc1ccc(O)c2C(=O)C=CC(=O)c12                  | 1 |   |   |
| O=P(c1ccccc1)(c2ccccc2)c3ccccc3              |   |   | 0 |
| COc1ccc2c(OC)c3ccoc3nc2c1                    | 1 |   |   |
| ClC(Cl)C(Cl)(Cl)Cl                           | 0 |   | 0 |
| CCCCCCCCCCCCOC(=O)CCSCCC(=O)OCCC             | 0 |   |   |
| Cc1onc(NS(=                                  | 0 |   | 0 |
| CC(=O)OC(C)(C)C                              |   |   | 0 |
| Cc1cc(N=Nc2ccccc2)c(N)cc1N                   | 1 |   |   |
| CCCCOCCOC(=O)C                               |   |   | 0 |
| CC(C)(C)NC(=O)C1CCC2C3CC=C4C=C(CCC           | 0 |   |   |
| O=C(Nc1ccccc1)Nc2cnns2                       |   |   | 1 |
| OC[C@@H]1CCCN2CCCC[C                         | 0 |   |   |
| O=n1c2ccc3ccccc3c2cc4c5ccccc5ccc14           | 0 |   |   |
| COC(=O)c1ccccc1N                             | 0 |   | 0 |

|                                                                |   |   |   |   |
|----------------------------------------------------------------|---|---|---|---|
| OCCBr                                                          |   |   | 1 | 0 |
| OC(=O)\C(=C(\C(Cl)Cl)/C(=O)O)\Cl                               |   |   | 1 |   |
| CN1[C@H]2CC[C@@H]1CC(C2)OC(c3ccccc3)c4ccccc4                   |   |   |   | 0 |
| COc1cc2O[C@H]3OC=C[C@H]3c2c4OC(=O)c1                           |   |   | 1 |   |
| COC(=O)C(Br)CBr                                                |   |   |   | 0 |
| CC(=CCCC(=CC#N)C)C                                             |   |   |   | 0 |
| O=C(OCCc1ccccc1)c2ccccc2                                       |   |   |   | 0 |
| ClCC1=C(Cl)C(=O)OC1                                            |   |   | 1 |   |
| CCCN1CCc2ccccc2                                                | 1 | 0 |   |   |
| CC(C)CCC[C@H]1CC1                                              | 0 | 0 |   |   |
| NC(=O)c1ncr                                                    | 0 | 0 | 0 |   |
| N1C2C1c3cc4ccccc4cc3c5ccccc25                                  |   |   | 1 |   |
| Nc1ccc(cc1)S                                                   | 0 |   |   | 0 |
| CCCCOC[C@H]1CO1                                                |   |   | 1 |   |
| Oc1ncc(F)c(O)n1                                                |   |   | 0 |   |
| CCOc1ccccc1                                                    | 1 |   |   | 1 |
| O[C@@]1(C)C                                                    | 0 | 0 |   |   |
| O=C1CCN(N1)c2ccccc2                                            |   |   |   | 0 |
| OC[C@H](O)[C@@H](O)[C@H](O[C@@H]1O[C@H](O)C(=O)Nc1cccc2cccnc12 |   |   | 1 |   |
| CCCC[C@@H](CC)CO                                               |   |   | 0 |   |
| CCCCC1cc(O)cc(O)c1                                             |   |   | 0 | 1 |
| CN1CCN2C(C1)c3ccccc3Cc4ccccc4                                  |   | 0 |   |   |
| CCOC(=O)Oc1ccccc1                                              | 1 | 0 |   |   |
| OCC#C                                                          |   |   | 1 | 0 |
| OCC(O)COP(=O)(O)O                                              |   |   | 0 |   |
| NNC(=N)N                                                       | 0 | 0 |   | 0 |
| NC(=O)N\N=                                                     | 0 |   | 1 |   |
| COC(=O)CCC(=O)O                                                |   |   |   | 0 |
| Oc1c(Cl)cc(Cl)c2cccnc12                                        |   | 0 | 0 | 1 |
| OCCNc1ccc(NCCO)c2C(=O)c3c(O)ccc(O)c3                           |   |   | 1 |   |
| CCc1cc2N(Cc3ccc(cc3)c4ccccc4)C(=O)Nc1                          |   | 0 |   |   |
| Cn1c(N)nc2c3ccc(O)nc3ccc12                                     |   |   | 1 |   |
| ClP(=O)(Cl)Cl                                                  |   |   |   | 0 |
| NC(CCC(=O)NC(CS)C(=O)NCC(=O)O)C(=O)N                           |   |   | 1 |   |
| CN1CCN(CC1)C2=CC(=O)c3[nH]c(C)c4c5ccccc54                      |   |   | 1 |   |
| CSc1ccc(Cl)cc1                                                 |   |   | 0 | 0 |
| NC[C@@H]1CC1                                                   | 0 | 0 |   |   |
| Cc1ccccc1n1C                                                   | 0 | 0 |   |   |
| OC(=O)C=Cc1ccccc1N(=O)=O                                       |   |   | 0 |   |
| CCCCOC(=O)\C=C\c1oc(cc1)[N+](=O)[O-]                           |   |   | 1 |   |
| ONc1ccc2ccccc2c1                                               |   |   | 1 |   |
| Nc1ccc(cc1)C                                                   | 0 | 0 |   | 1 |

|                                                   |   |   |   |   |
|---------------------------------------------------|---|---|---|---|
| <chem>COc1nsc2ccc(cc12)[N+](=O)[O-]</chem>        |   |   | 1 |   |
| <chem>COc1ccc(Cl)cc1C</chem>                      |   |   |   | 0 |
| <chem>CC(C)(C)c1ccc(S)cc1</chem>                  |   |   |   | 0 |
| <chem>CCCCOC(=O)c</chem>                          | 0 | 0 | 0 | 1 |
| <chem>Sc1ccc(cc1)N(=O)=O</chem>                   |   |   | 1 |   |
| <chem>O=N(=O)c1c2ccccc2cc3c1ccc4ccccc34</chem>    |   |   | 0 |   |
| <chem>CCCCOC(=O)\C=C/C(=O)OCCCC</chem>            |   |   | 0 |   |
| <chem>[O-][N+](=O)c1ccc(Nc2ccccc2)cc1</chem>      |   |   | 0 |   |
| <chem>CC1CCC2[C@](C)(CO)C(O)c</chem>              |   | 0 |   |   |
| <chem>CCN1CCCC1CNC(=O)c2cc(c</chem>               |   | 0 |   |   |
| <chem>COc1nncc2cccnc12</chem>                     |   |   | 0 |   |
| <chem>O=C(\C=C\C=C\c1ccc2OCOc2c1)N3CCCC</chem>    |   |   | 0 |   |
| <chem>Nc1cccc2ccc3ccccc3c12</chem>                |   |   | 0 |   |
| <chem>Cc1cccc2c1ccc3ccccc23</chem>                |   |   | 1 |   |
| <chem>Oc1ccc(Cl)cc</chem>                         | 0 | 0 | 0 | 1 |
| <chem>COC(=C1[C@H](C(=C(C)N=C1C)C(=O)OC</chem>    |   |   | 0 |   |
| <chem>[O-][n+]1cc2ccccc2cn1</chem>                |   |   | 0 |   |
| <chem>CN(C)c1ccc(cc1)N=Nc2ccc(NC(=O)C)cc2</chem>  |   |   | 1 |   |
| <chem>[O-][N+](=O)c1ccc2N(S\C(=N/C(=O)c3c</chem>  |   |   | 1 |   |
| <chem>CC(=O)c1ccc([nH]1)[N+](=O)[O-]</chem>       |   |   | 1 |   |
| <chem>CCN1CC[C@</chem>                            | 1 | 1 |   |   |
| <chem>COc1cc(ccc1N=Nc2cc(c3ccccc3c2O)S(=C</chem>  |   |   | 0 |   |
| <chem>COC(=O)C(C)(C)C</chem>                      |   |   |   | 0 |
| <chem>COc1cc2nc(n</chem>                          | 0 | 0 |   |   |
| <chem>NC1=NC(=O)</chem>                           | 0 | 0 |   | 0 |
| <chem>Fc1cnc2ccc3ccccc3c2c1</chem>                |   |   | 1 |   |
| <chem>O=N(=O)c1ccc2ccccc2c1</chem>                |   |   | 1 |   |
| <chem>COC(=O)C1=C(C)NC(=C(C1c2ccccc2N(=C</chem>   |   |   | 0 | 0 |
| <chem>ON(C=O)c1ccc(cc1)c2ccccc2</chem>            |   |   | 1 |   |
| <chem>CCN=C=S</chem>                              |   |   | 0 |   |
| <chem>Brc1ccccc1c2ccccc2</chem>                   |   |   | 0 | 0 |
| <chem>OC(=O)Cc1c[nH]c2ccccc12</chem>              |   |   | 0 | 0 |
| <chem>Cc1ccc(cc1)S(=O)(=O)OCC2CO2</chem>          |   |   | 1 |   |
| <chem>CO[C@@H]1</chem>                            | 0 | 0 |   |   |
| <chem>CCN(CC)CCNC(=O)c1ccc(NS(=O)(=O)C)cc1</chem> |   |   |   | 0 |
| <chem>CCOCOC</chem>                               |   |   | 0 |   |
| <chem>OC[C@H](O)</chem>                           | 0 | 0 |   | 0 |
| <chem>CC[N+](C)(CC</chem>                         | 0 | 0 |   | 0 |
| <chem>Fc1ccc(cc1Cl)C(=O)Cl</chem>                 |   |   |   | 0 |
| <chem>CCCC(=O)Nc1ncnc2c1ncn2</chem>               |   | 0 |   |   |
| <chem>Cc1cc2cc3cc(C)c(N)cc3nc2cc1N</chem>         |   |   | 1 |   |
| <chem>N[C@@H](CS\C(=C\Cl)\Cl)C(=O)O</chem>        |   |   | 1 |   |
| <chem>CCCOc1ccc2[nH]cc(C3=CC</chem>               |   | 1 |   |   |

|                                                         |   |   |   |
|---------------------------------------------------------|---|---|---|
| Clc1ccc(cc1)c2nc3scn3c2N(=O)=O                          | 1 |   |   |
| CNC(CC(=O)O)C(=O)N(C(C(=O)N)c1ccc(NCCO                  | 0 |   | 0 |
| CC1(N(O)c2ccccc2C1=O)c3ccccc3                           | 0 |   |   |
| CNCCCCOc1c                                              | 1 | 1 |   |
| CN(C)CCCO:                                              | 0 | 0 |   |
| Clc1ccc(Cl)cc                                           | 0 | 0 | 0 |
| O=C1c2c(ccc3ccccc23)c4ccc5ccccc5c14                     | 0 |   |   |
| O[C@@H]1CO[C@@](O)(CN(CC(=O)O)                          | 0 |   |   |
| CC1=CCC[C@@]2(C)O[C@H]2[C@H]3OC(=O)C(=C)[C(Oc1ccc(cc1)C | 0 | 0 | 1 |
| Oc1cc2ccccc3ccc4c5ccccc5cc1c4c23                        | 1 |   |   |
| Oc1cc2[nH]c3ccccc3c2cc1[N+](=O)[O-]                     | 1 |   |   |
| Clc1ccc(CC(=O)N2CCCC2C                                  | 1 |   |   |
| [O-][N+](=O)c1cc(c(Cl)c(c1)[N+](=O)[O-]                 | 1 |   |   |
| CC(C)[N+]1(C)C2CCC1CC(C                                 | 0 |   | 0 |
| [O-][N+](=O)c1cccc2cccc(c12)[N+](=O)                    | 1 |   |   |
| C1CCC(CC1)c2ccc3c(c2)c4C                                | 1 |   |   |
| C[S+](=O)([O-])Nc1c(O)cc                                | 0 |   |   |
| OS(=O)(=O)C                                             | 0 |   |   |
| Nc1ccc(cc1)N=Nc2cccc(N)c2N                              | 1 |   |   |
| CC(=O)OCC(=                                             | 0 | 0 |   |
| CNc1cc(OC)c                                             | 1 |   |   |
| CCc1nc(N)nc                                             | 0 |   | 0 |
| OC(=O)CCc1r                                             | 0 | 0 | 0 |
| CN1[C@H]2CC[C@@H]1CC(C2)OC(=O)C(CO)c3ccccc3             | 0 |   | 0 |
| C1CN=C(N1)c2cc3ccccc3cr                                 | 0 |   |   |
| NS(=O)(=O)c                                             | 0 |   | 0 |
| CC(=O)c1ccc(C)cc1                                       |   |   | 0 |
| COC(=O)c1ccc(CN(C)N=O)cc1                               | 0 |   |   |
| CC(=O)Nc1nnc(s1)c2oc(cc2)[N+](=O)[O-]                   | 1 |   |   |
| CC(C)(C)NC[C@H](O)c1ccc(O)cc1Cl                         |   |   | 0 |
| CCC(=O)O[C(                                             | 0 | 0 |   |
| Cc1cc(CC(=O                                             | 0 | 0 | 0 |
| CC1CC2(OC3OC(CO)C(O)C(O)C3O)C=C(C                       | 1 |   |   |
| O=Nc1ccc2ccc3c(ccc4ccc1c2c34)N(=O)=                     | 1 |   |   |
| Oc1ccc(cc1)C2=CC(=O)c3c                                 | 0 |   |   |
| CC(O)COC(C)(C)C                                         | 1 |   | 0 |
| CC(=O)OC[C(                                             | 0 | 0 | 0 |
| c1ccc2c(c1)ccc3nc4ccc5ccccc5c4cc23                      | 1 |   |   |
| CCCON(OC(=O)C)C(=O)c1ccccc1                             | 1 |   |   |
| CCOcn1c(c2ccc(Cl)cc2)c(C#N)c(Br)c1C(F)(F)F              |   |   | 1 |
| CCCCOC(=O)[C@@H](C)Oc1ccc(Oc2ccc(cn2)C(F)(F)F)          |   |   | 0 |



|                                             |   |   |   |
|---------------------------------------------|---|---|---|
| O=C1CN=C(c2ccccc2)c3cc(ccc3N1)N(=O)=O       |   |   | 0 |
| c1ccc2[nH]nnc2c1                            | 1 |   | 0 |
| CN(C)C(=O)Oc1nc(nc(C)c1C)N(C)C              |   |   | 0 |
| Nc1ncnc2c1ncn2C3CC(O)C                      | 0 | 0 |   |
| CN(C)CCNC(=O)c1cccc2[nH]c(nc12)c3cc         | 1 |   |   |
| COc1cc(c(C)cc1N=Nc2c(O)ccc3cc(ccc23)        |   |   | 0 |
| Nc1ccc(cc1N)c2ccc(N)c(N)c2                  | 1 |   | 1 |
| CC1C2C3C(C)C4C(=O)C56C(=O)c7c(O)cc(         |   |   | 0 |
| Cn1cccc1                                    | 0 |   |   |
| CCCCCCC#CC(=O)OC                            |   |   | 0 |
| COc1cc(N=Nc2c(Br)cc(cc2[N+](=O)[O-])        | 1 |   |   |
| O=C1CCCCC1C2CCCCC2                          |   |   | 0 |
| Nc1cccc1[N+](=O)[O-]                        | 0 |   |   |
| OC(=O)c1ccc                                 | 0 | 0 | 0 |
| Fc1ccc(cc1)N                                | 1 |   |   |
| [O-][N+](=O)c1ccc2c3ccccc3c4cccc5ccc:       | 1 |   |   |
| Oc1ccc(cc1)C(=O)c2cccc2                     |   |   | 1 |
| O=C1c2cccc2c3cccc13                         | 0 |   |   |
| CCCCCCCCCO(=O)c1ccc(O)cc1                   |   |   | 1 |
| CCC(=O)O[C(                                 | 0 | 0 | 0 |
| Cc1cc2c(OCC                                 | 1 | 0 |   |
| CC(c1c[nH]cn1)c2cccc(C)c2C                  |   |   | 0 |
| NC(=N)SCCc1                                 | 0 | 0 |   |
| COc1ccc2[nH]c(N)nc2c1                       | 0 |   |   |
| Clc1c(cc(cc1N(=O)=O)N(=O)=O)N(=O)=          | 1 |   |   |
| C(N1CCN=N1)c2cccc2                          | 1 |   |   |
| CC(C)CCCC(C)(C)O                            |   |   | 0 |
| ClCC(Cl)CCl                                 | 1 |   | 0 |
| COc1ccc(cc1O)C2CC(=O)c3                     | 0 | 0 |   |
| CC(=O)OC1C(O)C2OC3C=C(C)C(=O)C(O)(          | 0 |   |   |
| CCCSSC(=C(C)N(Cc1cnc(C)nc1N)C=O)CCO         |   |   | 0 |
| O=C1NCC2(CCN(CCC3ccccc                      | 0 |   | 0 |
| [O-]C(=O)COc1ccc(Cl)cc1Cl                   |   |   | 0 |
| CCN(C(=O)C)c1ccc2c(Cc3ccccc23)c1            | 1 |   |   |
| C1CCN(CC1)C                                 | 1 |   |   |
| CO\N=C(\C(=O)N[C@H]1[C@H]2SCC(=C(N2C1=O)C(= |   |   | 0 |
| COc1ccc2c3ccccc3C(=O)c4cccc1c24             | 1 |   |   |
| Cc1ccc2C(=O)c3ccccc3C(=O)c2c1               | 0 |   | 1 |
| c1ccc(cc1)c2cccc(c2)c3ccccc3                | 0 |   | 1 |
| CC(C)(C)c1on                                | 0 | 0 |   |
| CN1CCN2C(C                                  | 0 |   | 0 |
| C1CCN2C[C@@H]3C[C@@H](CN4CCCC[C@H]34)[C@    |   |   | 0 |
| ClC(=O)OCCOCCOC(=O)Cl                       |   |   | 0 |

|                                                |   |   |   |
|------------------------------------------------|---|---|---|
| Clc1cccc2oc3ccccc3c12                          | 0 |   |   |
| CCCC(=O)OC\C=C(/C)\CCC=C(C)C                   |   |   | 0 |
| CC(=O)O[C@                                     | 0 |   |   |
| CCC(C)C(=O)O                                   |   |   | 0 |
| COc1c2ccoc2nc3cc(O)ccc13                       | 0 |   |   |
| CCCC[C@@H](O)C1[C@@H](O)C[C@@H](O)C[C@@H](O)C1 |   |   | 0 |
| OS(=O)(=O)c1ccc2N\C=C/3\Nc4ccc(cc4C3=O)S(=O)(  |   |   | 0 |
| CN(C)c1ccc(cc1)N=O                             | 1 |   | 0 |
| CCCCCCCCCCCC[P+](CCCC)(CCCC)CCCC               |   |   | 1 |
| NCc1onc(O)c                                    | 0 | 0 |   |
| OCC(=O)[C@                                     | 0 | 0 |   |
| Oc1ccc(Cl)cc                                   | 0 | 0 | 0 |
| Cc1cc(C)nc(N                                   | 0 |   | 0 |
| CCOc1ccc(NC(=O)C)cc1N                          | 1 |   |   |
| Cc1cnc2ccccc2c1                                | 1 |   |   |
| OC(=O)[C@                                      | 0 | 0 |   |
| CCCCCCCCCCCC(=O)O                              |   |   | 0 |
| CCCN(CCC)CC                                    | 1 | 0 |   |
| CCOC(=O)Cc1c(C(=O)O)c2ccccc2n1C                | 0 |   |   |
| CN1C(=O)C(C                                    | 0 | 0 | 0 |
| CC(=O)Nc1cccc2cc(F)cnc12                       | 1 |   |   |
| CC1CN(\N=C\c2oc(cc2)[N+](=O)[O-])C(-           | 1 |   |   |
| O=C1Oc2ccc(c3ccc4cccc1c4c23)N(=O)=O            | 1 |   |   |
| CCCCCCCCCI                                     |   |   | 0 |
| Cc1ccc(CC2CO2)cc1                              | 1 |   |   |
| COC(Cc1ccccc1)OC                               |   |   | 0 |
| CCOC(=O)C(SP(=S)(OC)OC)c1ccccc1                | 0 |   |   |
| CC[C@@H](CO)[N+](=O)[O-]                       | 0 |   |   |
| CC(=O)c1c(C)cc(cc1C)C(C)(C)C                   |   |   | 0 |
| [O-][N+](=O)c1ccc(OC2CO2)cc1                   | 1 |   |   |
| C[N+](1(C)CCC(=C(c2ccccc2                      | 0 |   | 0 |
| OC(=O)c1ccc(cc1)N=Nc2ccc(O)c(c2)C(=O           | 0 |   |   |
| C[n+](1ccc(cc1)c2ccccc2                        | 0 |   |   |
| CC(C)(C)OOC(=O)c1ccccc1                        | 1 |   | 0 |
| O=Cc1oc(cc1)N(=O)=O                            | 1 |   |   |
| CC(=O)O[C@                                     | 0 | 0 | 0 |
| CCCc1ccc(O)cc1                                 |   |   | 1 |
| CCCNc1cc(cc(c1O)c2ccccc2                       | 0 |   |   |
| C\C(=N/O)\c1ccc(OCC(=O)N2CCCCC2)cc1            |   |   | 0 |
| CN(C)C(=O)\C=C\c1oc(cc1)[N+](=O)[O-]           | 1 |   |   |
| COC(=O)[C@H]1[C@H](C[C@@H]2CC[C@H]1N2C)OC      |   |   | 0 |
| CCC(C)NC(=O)C=Cc1oc(cc1)[N+](=O)[O-]           | 1 |   |   |
| CC1=CC(=O)C=C(C)C1=O                           | 0 |   |   |

|                                                 |   |   |   |
|-------------------------------------------------|---|---|---|
| CC(=O)Nc1ccc(cc1)S(=O)(=O)c2ccc(N)cc            | 0 |   |   |
| Cc1cccc(C)c1                                    | 0 | 0 | 0 |
| C[C@@H]1C[C@H]2OC(=O)[C@]3(C)[C@                | 0 |   |   |
| OCC(O)CN=N#N                                    | 1 |   |   |
| CCC(Oc1ccccc1)C(=O)N[C@H]2[C@H]3SC(C)(C)[C@@    |   |   | 0 |
| CCN(CC)CCCC                                     | 1 |   |   |
| NC(=S)NC(=S)N                                   |   |   | 0 |
| Nc1ccc(C=Cc2ccc(N)cc2S(=O)(=O)O)c(c1)S(=O)(=O)O |   |   | 0 |
| O=N(=O)c1cccc2c1ccc3ccccc23                     | 1 |   |   |
| CCC1(O)CC(OC2CC(C(O)C(C)O2)N(C)C)c              | 1 |   |   |
| CCOC(=O)c1cncn1[C@H](C                          | 0 |   |   |
| OC[C@H]1O[C@H](C[C@@H]1O)N2C=C(I)C(=O)NC2=      |   |   | 0 |
| CC(=O)c1ccccn1                                  | 0 |   | 0 |
| C1CCC(CC1)N                                     | 1 | 1 |   |
| CCc1nccnc1CC                                    |   |   | 0 |
| CN(C)C1CCCCC1                                   | 0 |   |   |
| CCCCc1ccc(O)cc1                                 |   |   | 1 |
| CN1CCCC(C1)OC(=O)C(O)(                          | 0 |   |   |
| COc1cc2CC[N                                     | 0 | 0 | 0 |
| Cc1cc(Nc2ccccc2C(=O)O)ccc1Cl                    |   |   | 1 |
| CC(C)(C)c1cc(O)ccc1O                            | 0 | 0 | 0 |
| NCc1cccnc1                                      | 0 |   | 0 |
| Cl[C@@H]1[C@@H](Cl)[C@@H](Cl)[C@                | 0 |   |   |
| [O-][N+](=O)c1ccc2c(c1)c(cc3ccccc23)            | 1 |   |   |
| CN=C(O)C=Cc1oc(cc1)N(=O)=O                      | 1 |   |   |
| C(Cc1ccc(cc1)c2ccccc2)C3CO3                     | 1 |   |   |
| CCCCCCC(=O)OC1CC(C)(C)†                         | 0 |   |   |
| CCCCCCCCC#N                                     |   |   | 0 |
| O[S+](=O)([O-])CNNC(=O)                         | 0 |   |   |
| OC(=O)CN(C                                      | 1 | 0 |   |
| Cc1ccc(C)c2c3C4OC4C(O)C(O)c3ccc12               | 1 |   |   |
| CN(C)c1ccc(cc1)N=NS(=O)(=O)O                    | 1 |   |   |
| OC[C@H](O)Cl                                    | 1 |   |   |
| C\C=C\CCO                                       | 0 | 0 |   |
| CCC(=O)Nc1cccc(N)c1                             |   |   | 0 |
| OC(=O)\C=C/                                     | 0 | 0 |   |
| ClC(Cl)c1ccccc1                                 | 1 |   | 0 |
| ClC(=O)OCC1c2ccccc2c3ccccc13                    | 1 |   |   |
| ClCCN(CCCl)c1ccc2cc(oc2c1)N(=O)=O               | 1 |   |   |
| Fc1cccc2ncccc12                                 | 1 |   |   |
| C\C=C\C=C(O)\C=C/C=C(/C)\C=C/C1=C(C)            | 1 |   |   |
| CCC(C)c1nccnc1OC                                |   |   | 0 |
| NC(=O)[O-]                                      |   |   | 0 |

|                                                                   |   |   |   |   |
|-------------------------------------------------------------------|---|---|---|---|
| CCCCC(=O)Cc1cc(O)cc2Oc3c(CCCCC)c(C                                | 0 |   |   |   |
| Nc1ccc(\C=C\C(=O)O)cc1                                            | 0 |   |   |   |
| NS(=O)(=O)c1cc2c(NC(Cc3cccc3)NS2(=O)=O)cc1Cl                      |   |   | 0 |   |
| CCC(CCC(C)O)COC(=O)CCCC(=O)O                                      | 0 |   |   |   |
| CCC(C)(C)C(=O)O[C@@H]:                                            | 0 |   |   |   |
| CN1CC(=O)N                                                        | 0 | 0 |   | 0 |
| OC1C=Cc2ccc3ncccc3c2C1O                                           |   |   | 0 |   |
| IC(I)I                                                            | 0 | 0 | 1 | 0 |
| C[N+](C)(C)C                                                      | 0 |   |   |   |
| Cc1ccc(N)nc1                                                      |   |   |   | 0 |
| Cc1cccc(c1)N(=O)=O                                                |   |   | 0 | 0 |
| COc1ccc(cc1)C(=O)CC(=O)O                                          |   | 0 |   | 0 |
| CCOC(=O)CO                                                        | 1 | 0 |   |   |
| Oc1ccc2C[C@H](O)C(=O)N2                                           | 0 | 0 |   |   |
| Clc1cccc(C=O)c1                                                   |   |   | 0 |   |
| CC(C)C[C@H](NC(=O)[C@H](CCc1cccc1)NC(=O)CN2C(=O)N2                |   |   |   | 0 |
| Cc1ccc2ccc3c4ccc5c(C)cccc5c4ccc3c2c1                              |   |   | 0 |   |
| Cn1cncc1[N+](=O)[O-]                                              |   |   | 1 |   |
| O[C@@H]1CO[C@@H]2[C@@H](CO[C@@H]1)C(=O)N2                         |   |   | 0 |   |
| Clc1cc(Cl)nc(Cl)n1                                                |   |   | 0 | 0 |
| CCOP(=O)(CC)OCC                                                   |   |   | 0 |   |
| CCn1c(N)nc2c3cccnc3cc(C)c12                                       |   |   | 1 |   |
| C[C@H]1O[C@H](C[C@H](O)[C@H]1O[C@H]2C[C@H](O)C(=O)N2)C(=O)N1      |   |   |   | 1 |
| CO[C@@H]([C@@H]1Cc2cc3cc(O[C@H]4C[C@@H](O)C(=O)N4)C(=O)N1)C(=O)N1 |   |   |   | 1 |
| O[C@H]1C=Cc2cc3c(cc2[C@@H]1O)c4ccccc4                             |   |   | 1 |   |
| COc1ccc2c(c1)C(=O)N2                                              | 0 |   |   |   |
| Cc1ccc(NCCO)cc1O                                                  |   |   | 0 |   |
| N(c1ccc(Nc2ccc3cccc3c2)cc1)c4ccc5ccc(N)cc54                       |   | 1 |   | 0 |
| CN1CCC[C@H]1C(=O)N                                                | 1 | 1 |   | 0 |
| CCCCC(=O)C                                                        |   |   |   | 0 |
| CN[C@H](CC)C(=O)N                                                 | 0 | 0 |   |   |
| NC(CN1C=CC(=O)N(Cc2ccc(N)cc2)C(=O)N1)C(=O)N                       |   |   | 0 |   |
| CC1(C)S[C@@H]2[C@H](NC(=O)[C@H](N)c3cccc3)C(=O)N2                 |   |   |   | 0 |
| CC(C)CON=O                                                        |   |   | 1 | 0 |
| Cc1cccc1Br                                                        |   |   | 0 | 0 |
| CC(\C=C/C#N)\c1ccc(Cl)c(Cl)c1)C(C#N)C(=O)N                        |   |   | 1 |   |
| CC(C)NC(=NC(C)C)OCc1ccc(cc1)[N+](=O)[O-]                          |   |   | 1 |   |
| CC(C)(C)C1CCCC1O                                                  |   |   |   | 0 |
| CCc1oc2cccc(N)cc2c1                                               | 0 | 0 |   | 1 |
| Cn1c(N)nc2cc(Cl)ccc12                                             |   |   | 1 |   |
| N[C@@H](C)C(=O)N                                                  | 0 | 0 |   |   |
| CC(=O)C(=O)O                                                      |   |   |   | 0 |
| OC(=O)c1cc(cc1)[N+](=O)[O-][N+](=O)[O-]                           |   |   | 1 |   |

|                                              |   |   |   |
|----------------------------------------------|---|---|---|
| COc1ncnc(N[S+](=O)([O-]))                    | 0 |   |   |
| CCC(C(=O)OC                                  | 0 | 0 | 0 |
| O=CC=O                                       | 0 | 0 | 1 |
| OCC(COC(=O)C=C)(COC(=O)C=C)COC(=C            | 0 |   | 1 |
| OC(Cc1ccncc1)C(Cl)(Cl)Cl                     | 0 |   |   |
| Cc1c(C)c2c(Cl)c3cccc3nc2c4cccc14             |   | 1 |   |
| O[C@@H](C(=O)O)c1cccc1                       |   |   | 0 |
| CC(C)(Nc1nc(Cl)nc(NC2CC2)n1)C#N              |   |   | 0 |
| C[C@]12CC[C@H]3[C@@H](CCc4cc(O)ccc34)[C@@H   |   |   | 0 |
| CCN(C(=O)CCCl)c1snc2cccc12                   |   | 1 |   |
| O=C1Oc2ccc(cc2c3cccc13)N(=O)=O               |   | 1 |   |
| Oc1cc(O)c2C(=O)C[C@@H                        | 0 |   |   |
| C([C@H]1CO1)c2ccc(Cc3cccc3)cc2               |   | 1 |   |
| C[C@H]1[C@H]2Cc3ccc(O)cc3[C@]1(C)CCN2CCc4ccc |   |   | 0 |
| Cc1cc(cc(c1O)[N+](=O)[O-])[N+](=O)[O         | 0 |   |   |
| Clc1ccc(Nc2ccc(cc2)N(=O)=O)cc1               |   | 1 |   |
| Cn1c(N=N#N)nc2c3cccc3ccc12                   |   | 1 |   |
| CC(N)(C(=O)O)c1ccc(cc1)P                     | 0 |   |   |
| Cc1ccc(N=Nc2c(O)c(cc3cc(ccc23)S(=O)(         |   | 1 |   |
| CCN[C@H](C)Cc1cccc(c1)C(F)(F)F               |   |   | 0 |
| CCCCCCC                                      |   |   | 0 |
| Nc1nc(cs1)\C(=N/OCC(=O)O)\C(=O)N[C@H]2[C@H]3 |   |   | 0 |
| Oc1ccc(cc1)C                                 | 0 |   | 0 |
| CN(CCO)CC(C                                  | 0 | 0 | 0 |
| CO[C@H]1C[C@H](O[C@H]2[C@H](C)O[C@H](C[C@    |   |   | 1 |
| Cc1cc2CCc2c3ccc4cccc4c13                     |   | 0 |   |
| CCCCCCCCS(=O)(=O)Cl                          |   |   | 0 |
| CN1CSC(=S)N(C)C1                             |   | 1 | 0 |
| COc1cccc1N2CCN(CCN3C                         |   | 1 |   |
| CN1CCC23C4Oc5c(O)ccc(CC1C2C=CC4O)            |   | 0 |   |
| COc1ccc(CCNCC(O)COc2ccc(C)c2)cc1OC           |   |   | 0 |
| Fc1ccc(F)c2c1ccc3cccnc23                     |   | 1 |   |
| CC(=O)CCC(=                                  | 0 | 0 | 0 |
| CCCCCCC#N                                    |   |   | 0 |
| Cn1cc(NC(=C                                  | 0 | 0 | 0 |
| [O-][N+](=O)c1ccc2ccc3c4C=CCCc4cc5c          |   | 1 |   |
| CC(C)OC(=O)C[C@@](O)(CC(=O)O)C(=C            |   | 0 |   |
| Nc1[nH]ccc2nc3cccc3c12                       |   | 1 |   |
| OC(=O)CN(CCN(CC(=O)O)C                       | 0 | 0 | 0 |
| C1CN=C(N1)c2ccc(cc2)c3cc4ccc(cc4[nH]         |   | 0 |   |
| Brc1ccc(NC(=O)c2csc(c2)N(=O)=O)cc1           |   | 1 |   |
| N[C@@H](C(=O)O)c1ccc(c                       | 0 |   |   |
| [O-][N+](=O)c1ccc2C3OC3c4cccc5c6ccc          |   | 1 |   |

|                                                 |   |   |   |   |
|-------------------------------------------------|---|---|---|---|
| CN1[C@H]2CC[C@@H]1CC(C2)OC(=O)c3c[nH]c4cccc     |   |   |   | 0 |
| OC[C@H]1O                                       | 0 |   |   |   |
| Cc1cccc2c1ccc3c4cccc4ccc23                      |   | 1 |   |   |
| Nc1cccc1S(=O)(=O)c2cccc2                        |   |   |   | 0 |
| Cl[C@@H]1[C@H](Cl)[C@@H](Cl)[C@@H](Cl)[C@H]     |   |   |   | 1 |
| N[S+](=O)([O-])Cc1noc2cc                        | 0 |   |   |   |
| NC(=N)S(=O)O                                    |   | 0 |   | 0 |
| c1ccc2nccnc2c1                                  |   | 1 |   | 0 |
| O=C1Nc2ccc(cc2C1=O)N(=O)=O                      |   | 1 |   | 1 |
| CN1CCCC1=O                                      |   | 0 |   | 0 |
| NC(CSCc1cccc1)C(=O)O                            |   | 0 |   |   |
| CN1CCC(O)(C                                     | 1 | 0 |   | 0 |
| ClCCOCCCl                                       |   | 1 |   | 0 |
| [O-][N+](=O)c1oc2ccc(cc2c1)N(CCCl)CCl           |   | 1 |   |   |
| CC(C)C(Br)C:                                    | 0 | 0 |   | 0 |
| CN1CCN(CC1)C(=O)C                               |   | 0 |   |   |
| NC(=N)c1ccc2cc([nH]c2c1)C(=N)N                  |   | 0 |   |   |
| CCC(CO)(CO)N(=O)=O                              |   |   |   | 0 |
| Cc1cccc(N)c1                                    |   | 0 |   | 0 |
| CCCCOP(=O)OCCCC                                 |   |   |   | 0 |
| CN1CCC[C@                                       | 0 | 0 | 0 | 0 |
| CC(O)CC(C)(C)O                                  |   |   |   | 0 |
| CC(C)CN                                         |   | 0 |   |   |
| CC[C@@H](C)OC(=O)\C=C\c1oc(cc1)[N-              |   | 1 |   |   |
| CN(C)c1ccc(cc1)N=Nc2ccc(OC3OC(CO)C              |   | 0 |   |   |
| Nc1ccc(Cc2cc(O)c(N)c(Cl)c2)cc1Cl                |   | 0 |   |   |
| CC(C)OS(=O)(=O)C                                |   | 1 |   |   |
| BrCC(=O)Nc1cccc1                                |   | 0 |   |   |
| Nc1ccc(cc1)S                                    | 0 |   |   | 0 |
| O=C(Nc1cccc1)OCC(CN2CCCC2)OC(=O)Nc3cccc3        |   |   |   | 0 |
| CCC(=N(=O)O)C(C)O                               |   | 0 |   |   |
| CNC(=O)CC(N)C(=O)NC(C(=O)NC1C2SC(               |   | 0 |   |   |
| CCOP(=O)(OCC)Oc1ccc(cc1)[N+](=O)[O-             |   | 1 |   |   |
| COCC(C)O                                        |   |   |   | 0 |
| Oc1c(cc2c3cc(ccc3[nH]c2c1[N+](=O)[O-            |   | 1 |   |   |
| CCN(CC)CCO                                      | 1 | 1 |   | 0 |
| Clc1cc(c(Cl)c(Cl)c1Cl)N(=O)=O                   |   | 0 |   |   |
| CC(C)C(=O)OCC\C=C(/C)\N(Cc1cnc(C)nc1N)C(=O)\SS\ |   |   |   | 0 |
| CCCCCCCOC(=O)C                                  |   |   |   | 0 |
| [O-][N+](=O)c1cccc(C=O)c1                       |   | 1 |   |   |
| [O-][N+](=O)c1ccc(CBr)cc1                       |   | 1 |   |   |
| CCOC(=O)[C                                      | 0 | 0 |   |   |
| NCc1cccc1S                                      | 0 | 0 |   | 0 |

|                                                |   |   |   |   |
|------------------------------------------------|---|---|---|---|
| CCOC(=O)C(C)O                                  |   |   |   | 0 |
| [O-][N+](=O)c1ccc(Nc2ccc(cc2)N=C=S)c           |   |   | 0 |   |
| CC(=C)c1cc(O)c(C)cc1O                          |   |   | 0 |   |
| CC1(C)[C@@H](\C=C(/Cl)\C(F)(F)F)[C@H]1C(=O)O[C |   |   |   | 1 |
| ClC(Cl)(Cl)CC1CO1                              |   |   | 1 |   |
| Cc1cc(O)cc(C                                   | 0 | 0 |   | 1 |
| CC1OC(C)C(=N1)C                                |   |   |   | 0 |
| COC(=O)Nc1nc2cccc2[nH]1                        |   |   | 1 | 0 |
| COCCOC(=O)C                                    |   |   | 1 |   |
| COc1cccc2c1CC(c3ccc4OCoc4c23)[N+](:            |   |   | 1 |   |
| CC(C)c1c(O)c                                   | 0 | 0 | 0 | 1 |
| CC(C)(C)c1cccc(O)c1                            |   |   |   | 1 |
| CC(=C)[C@H]1CCC(=CC1)C=O                       |   |   |   | 0 |
| O=C1NC(=O)[C@H]2[C@H]3[C@H](C=C3)[C@@H]1       |   |   |   | 0 |
| COc1cc(CCC(=O)C)ccc1O                          |   |   | 0 | 0 |
| CCc1c([nH]c2ccc(Cl)cc12)C                      |   | 0 |   |   |
| Nc1nc(nc2c1ncn2C3CC(O)C(CO)O3)c4cc             |   |   | 1 |   |
| Clc1ccc([C@I                                   | 1 | 0 |   |   |
| NC(=S)C(=Cc:                                   | 0 | 0 |   |   |
| CC(C)CCCCCN                                    |   |   |   | 0 |
| Nc1ccc2cc3ccccc3cc2c1                          |   |   | 1 | 1 |
| OCN=N                                          |   |   | 1 |   |
| CC(C)(O)C#N                                    |   |   | 0 | 0 |
| CCCCCCCCC(                                     | 0 | 0 |   | 0 |
| CC(O)CN(CC(C)O)N=O                             |   |   | 1 |   |
| CCCCCCC\C=                                     | 0 | 0 |   | 0 |
| OC(=O)c1cc(ccc1[N+](=O)[O-])[N+](=O)           |   |   | 1 |   |
| Nc1cc(Cl)cc(Cl)c1O                             |   |   | 0 |   |
| Cc1cc(N)c(C)c(c1N)N(=O)=O                      |   |   | 1 |   |
| O=N(=O)c1ccc2c(c1)cc(c3ccc(cc23)N(=C           |   |   | 1 |   |
| Cc1ccc(NS(=O)(=O)c2cccc3ccnc23)cc1             |   |   | 0 |   |
| CN(CCN1CCCC1)CCc2ccc(Cl                        |   |   | 1 |   |
| c1cc2ccc3cccc4ncc(c1)c2c34                     |   |   | 1 |   |
| CN(CCC1ccc(Cl)c(Cl)c1)CC(                      |   |   | 1 |   |
| Cc1cccc1Cl                                     |   |   | 0 | 0 |
| [O-][N+](=O)c1ccc2cccc3C=Cc1c23                |   |   | 1 |   |
| CC12CCC3C(CCC4CC(O)CCC34C)C1CCC(=              |   |   | 0 |   |
| O=C1CCO1                                       | 0 | 0 | 1 | 0 |
| N\C(=N/O)\c1cccc1                              |   |   | 1 |   |
| CC(C)Cc1ccc(                                   | 0 | 0 |   | 0 |
| CN(C)CCc1c[nH]c2ccc(O)cc12                     |   |   |   | 0 |
| C[N+]12CCCC                                    | 1 | 0 |   |   |
| CCOC(=O)CN1C(=O)Sc2cccc(Cl)c12                 |   |   |   | 0 |

|                                           |   |   |   |   |
|-------------------------------------------|---|---|---|---|
| CCCCCCCCCCCCC(=O)OCC                      |   |   | 0 |   |
| [O-]c1cc(Cl)c(Cl)cc1Cl                    |   |   | 1 |   |
| CCC(N)Cc1c[                               | 0 | 0 | 1 |   |
| Cl[C@H]1CCCN(C1)N=O                       |   |   | 1 |   |
| OC(=Nc1cccc(Br)c1)c2csc(c2)N(=O)=O        |   |   | 1 |   |
| CCCCCCCC(=O)OCC(C)OC(=O)CCCCCCCC          |   |   | 0 |   |
| Nc1nc[nH]n1                               |   |   | 0 |   |
| CCC(C)C(=O)OCCc1cccc1                     |   |   | 0 |   |
| C(CCC1CO1)CC2CO2                          |   |   | 1 |   |
| CSc1nc(NC2CCCC2)c(c(NC                    |   | 1 |   |   |
| COc1ccc2Oc3cc(O)cc(O)c3C(=O)c2c1          |   |   | 1 |   |
| COc1ccc(CN2                               | 0 | 0 |   | 0 |
| CCC(C)Cl                                  |   |   |   | 0 |
| C[N+](C)(C)CCNCCc1ccc(cc1)N=Nc2ccc(c      |   |   | 1 |   |
| Nc1cccc2C(=                               | 0 | 0 |   | 0 |
| Cc1ccc(C=O)cc1                            |   |   | 0 |   |
| CNC(=O)Nc1cccc1                           |   |   | 0 |   |
| O[C@H]1CC[C@@]2(O)[C@H]3Cc4ccc(O)c5O[C@@+ |   |   |   | 0 |
| CC(C)C(=O)N                               | 0 | 0 |   |   |
| CN1CCN(CC1)C2=Nc3cc(Cl)ccc3Nc4cccc        |   |   | 0 | 1 |
| C1CCC2CCCCC2C1                            |   |   |   | 0 |
| CC(C)CC(C)(C)C                            |   |   |   | 0 |
| O=CN1CCOCC1                               |   |   |   | 0 |
| CN(C)CCCN1c                               | 1 | 1 |   |   |
| Oc1ccc(cc1[N+](=O)[O-])c2ccc(O)c(c2)[     |   |   | 0 |   |
| CC[C@@H](C                                | 0 | 0 |   | 0 |
| CC(=O)OCC(=                               | 0 |   |   |   |
| CCCCCCCC[P+](CCCCCCCC)(CCCCCCCC)CCCCCCCC  |   |   | 1 |   |
| N1[C@@H]([C@H]1c2cccc2)c3cccc3            |   |   | 1 |   |
| CN1C(O)C(O)N(C)C1=O                       |   |   |   | 0 |
| ClC1=C(Cl)C2(Cl)C3C4CC(C=C4)C3C1(Cl)C     |   |   | 0 |   |
| Cc1ccc2cc(C)c3c4C5OC5C(O)C(O)c4ccc3       |   |   | 1 |   |
| N[S+](=O)([O-])c1cc2c(NC                  |   | 0 |   |   |
| OC[C@H]1O[C@H](C[C@@H]1O)N2C(=            |   |   | 1 | 0 |
| Clc1ccc(C(Cn2ccnc2)OCC(=                  |   | 0 |   |   |
| CC(C)(C)c1ccc(OP2OCC3(COP(Oc4ccc(cc       |   |   | 0 |   |
| Cc1cccc(C)c1                              | 0 | 0 |   | 0 |
| CCC(=O)O[C@@]1(CCN(C)C[C@H]1C)c2cccc2     |   |   |   | 0 |
| Oc1ccc2CC3N                               | 1 | 1 |   |   |
| OCC1ccc(F)cc1                             |   |   | 0 |   |
| CN1C(=O)C[C                               | 0 | 0 |   | 0 |
| OC[C@@H](O)[C@H]1O[C@@H]2O[C@@H](O[C@@    |   |   |   | 0 |
| C[S+](O)c1ccc(\C=C/2\C                    |   | 0 |   |   |



|                                                |   |   |   |
|------------------------------------------------|---|---|---|
| Nc1ccccc1S                                     | 1 |   |   |
| COc1ccc(C=O)cc1                                | 0 | 0 |   |
| CN(C)CCC(O)(c1ccccc1)c2ccccc2Cl                |   | 0 |   |
| CC(=O)OCc1c2ccccc2cc3ccc4ccccc4c13             | 1 |   |   |
| Oc1ccc2Cc3ccccc3c2c1                           |   | 1 |   |
| CN1CCC(=C2c                                    | 1 | 1 |   |
| CC1(C)O[C@@H]2C[C@H]3[C@@H]4C[C@H](F)C5=C      |   | 0 |   |
| CC(=O)Nc1cc2Cc3ccccc3c2cc1OC(=O)C              | 0 |   |   |
| CC(C)NC1=C(                                    | 0 | 0 | 0 |
| O=C1CCCC1                                      |   |   | 0 |
| Cc1cccc(C)c1                                   | 0 | 0 | 0 |
| COCCOC(=O)C1=C(C)NC(=C(C1c2cccc(c2)N(=O)=O)C(= |   |   | 1 |
| Fc1ccc(cc1)\C(=C\C=C\C2ccccc2)\C#N             | 1 |   |   |
| CC\C(=C(\CC)                                   | 0 | 0 | 0 |
| Oc1ccc2SC(=                                    | 0 | 0 | 0 |
| CCCCCCC=C                                      | 0 |   | 0 |
| CCN1C(Nc2ccc(OCCN3CCCC3)cc2)c4ccccc4C1=O       |   |   | 0 |
| Oc1cc(O)c2C[C@@H](OC(=O)c3cc(O)c(O)c(O)c3)[C@  |   |   | 0 |
| ClC1=C(Cl)C(=O)N(N=C1)C(=O)c2ccccc2            | 0 |   |   |
| BrCC(=O)c1oc(c(c2ccccc2)c1c3ccccc3)N           | 1 |   |   |
| Oc1cc2ccc3c4ccccc4c5cc6ccccc1c6c2c35           | 0 |   |   |
| Nc1nc2c(ccc3ncccc23)s1                         | 1 |   |   |
| COc1nccnc1N[S+](=O)([O-                        | 0 |   |   |
| CCCCNc1ccccc1                                  |   |   | 0 |
| Oc1ccccc1C(=                                   | 0 | 0 |   |
| Nc1ccc(cc1O)c2ccc(N)c(O)c2                     | 1 |   |   |
| CC(=O)Nc1ccc2cccn2c1                           | 1 |   |   |
| [O-][N+](=O)c1ccc2C=C[S+                       | 0 |   |   |
| CC(=O)NNc1ccc(CO)cc1                           | 1 |   |   |
| CC(C)c1ccc(C)c(O)c1                            | 0 |   |   |
| Cc1cc(C)c(cc1N(=O)=O)N(=O)=O                   | 1 |   |   |
| OC1=C\C(=N/c2ccc(cc2)[N+](=O)[O-])\C           | 1 |   |   |
| C(N(Cc1ccccc1)c2ccccc2)C                       | 0 |   | 0 |
| O=CC1CO1                                       | 1 |   |   |
| COc1ccc(\C=                                    | 0 | 0 |   |
| [O-][N+](=O)c1cc(ccc1F)N=[N+]=[N-]             | 1 |   |   |
| [O-][N+](=O)c1cccc2c3cc4ccccc5ccc6ccc(         | 1 |   |   |
| COc1cc2CC[N                                    | 0 | 0 | 0 |
| CCcn1c(C)c(C                                   | 1 |   |   |
| ClCCNC(=O)Sc1[nH]cnc2ncnc12                    | 1 |   |   |
| CC[N+](CC)(C                                   | 0 | 0 | 0 |
| Cc1cnc2ccc3c(nc(N)n3C)c2n1                     | 1 |   |   |
| CCC(=O)NCC(                                    | 0 | 0 |   |

|                                          |   |   |   |
|------------------------------------------|---|---|---|
| Nc1c2C(O)CCCc2nc3ccccc1                  | 0 | 0 | 0 |
| CC(=O)N[C@                               | 0 | 0 |   |
| CCOC(=O)NNc1nccc2ccccc12                 |   | 1 | 0 |
| NC(=O)c1ccc                              | 0 | 0 |   |
| CCCCC[C@                                 | 0 | 0 | 0 |
| COC[C@H]1CO1                             |   | 1 |   |
| C\C\1=C/CCC2(C)OC2[C@                    | 0 |   |   |
| C=COC(=O)C=C                             |   | 0 |   |
| OC(=O)C=Cc1cccc(c1)N(=O)=O               |   | 1 |   |
| Clc1ccc2c(c1)                            | 0 | 0 | 0 |
| CN(C)CNc1oc(\C=C\c2oc(cc2)[N+](=O)[      |   | 1 |   |
| Fc1cc(F)c2ncccc2c1                       |   | 1 |   |
| [O-][N+](=Nc                             | 0 | 0 | 1 |
| COC(=O)C(CSCC(Br)c1ccccc1)NC(=O)C        |   | 0 |   |
| C\C=C\1/C2C                              | 0 | 0 |   |
| ClCl                                     |   | 0 |   |
| OC(CN1CCCCC1)c2cc(on2)c3ccccc3           |   |   | 0 |
| CC(O)CCl                                 |   | 1 | 0 |
| CC12C(O)C=CC3(OC1=O)C4CCC5(O)CC4(        |   | 0 |   |
| CC(C)CCCC(C)CCCC(C)CCCC                  | 0 | 0 |   |
| C[N+](C)C2CCCC1CC(C2)O(                  | 0 |   |   |
| [O-][N+](=O)c1ccc2ccc3ccc(cc3c2c1)[N-    |   | 1 |   |
| ClCC(=O)c1ccc(Cl)cc1Cl                   |   | 1 | 0 |
| ClC(Cl)C(=C(Cl)Cl)C=O                    |   | 1 |   |
| Oc1ccc(\C=N\n2nnc3c4ccccc4nc3c2O)cc      |   | 1 |   |
| NC(C(=O)O)c1ccc(cc1)C(=                  | 0 |   |   |
| CCCCCCCCc1                               | 0 | 0 | 0 |
| CC(C)(C)OC(=O)OC(=O)OC(C)(C)C            |   | 0 |   |
| CC(OP(=O)(C)F)C(C)(C)C                   |   | 0 |   |
| CCCCCCCC(=O)OCCCCC                       |   |   | 0 |
| [O-][N+](=O)c1c(nc2SCCn12)c3ccc(Cl)cc    |   | 1 |   |
| FC(Cl)C(F)(F)C(F)(F)Cl                   |   | 0 |   |
| CC(=O)OC1Cc2ccc3ccc4ccccc5cc1c2c3c45     |   | 1 |   |
| [O-][N+](=O)c1ccc(Oc2ccccc2)cc1          |   | 1 |   |
| CCOC(OCC)OCC                             |   |   | 0 |
| COc1ccc2ncc                              | 1 | 0 | 0 |
| CCOc1ccc(cc1)N(O)C(=O)C                  |   | 1 |   |
| CO[C@H]1CN(CCCOc2ccc(                    |   | 1 |   |
| NCC1OC(O[C@H]2[C@H](                     |   | 0 |   |
| CCCCOC(CC)OC(C)COC(O)CC                  |   |   | 0 |
| CCCN(CCC)c1c(cc(cc1N(=O)=O)C(C)C)N(=O)=O |   |   | 1 |
| CCC1OC(=O)(                              | 0 | 0 |   |
| C[S+](C)CC[C                             | 0 | 0 |   |

|                                                   |   |   |   |   |
|---------------------------------------------------|---|---|---|---|
| CC(=O)OCC1=                                       | 0 | 0 |   |   |
| CC1(C)[C@H]                                       | 0 | 0 |   |   |
| COc1ccc(NC(=O)c2ccc(cc2                           |   | 1 |   |   |
| CNc1ccc2nccnc2c1C                                 |   |   | 1 |   |
| Nc1ccc2c3ccccc3[nH]c2n1                           |   |   | 1 |   |
| COc1ccc2oc(cc2c1N(CCCl)CCCl)N(=O)=C               |   |   | 1 |   |
| OC(=O)c1ccccc1S                                   |   |   |   | 0 |
| CNc1ccc2ncc(nc2c1C)c3ccccc3                       |   |   | 1 |   |
| CN(C)N=Nc1ccc(C)cc1                               |   |   | 1 |   |
| CCCCCCCC\C=C/CCCCCCCCCCCC(=O)O                    |   |   |   | 0 |
| CC1C2C(=Nc3ccccc23)N(C)c4c(C)cccc14               |   |   | 1 |   |
| O=N(=O)c1ccc(cc1)S(=O)(=O)Nc2ccccc2               |   |   | 0 |   |
| CC(=CCC\C=C\C\C\C\C=C\C\C\C=C\C\C1=C(C)C(=O)c2ccc |   |   |   | 0 |
| CC(C)(C)NC[C                                      | 0 | 0 |   |   |
| ClCC(Br)CBr                                       |   |   | 1 |   |
| Cc1cccc(c1)N=C(O)c2csc(c2)N(=O)=O                 |   |   | 1 |   |
| O=N(=O)c1cccc2c[nH]nc12                           |   |   | 1 |   |
| N[C@@H](C                                         | 0 | 0 |   | 0 |
| OC[C@@H](NC(=O)C(Cl)Cl                            |   | 0 |   |   |
| OC(=O)c1cc(                                       | 0 | 0 |   |   |
| Brc1ccc2[nH]                                      | 0 | 0 |   |   |
| ClC1=C(Cl)C2(Cl)C3C(C(=O)OC3=O)C1(Cl)C2(Cl)Cl     |   |   |   | 0 |
| CC(=C)[C@H]                                       | 0 | 0 |   | 0 |
| OC[C@H]1O[C@@H]([C@                               |   | 0 |   |   |
| OP(=O)(O)Oc1ccccc1                                |   |   |   | 0 |
| CCC(=O)N(C1CCCC1N(C)C)c2ccc(Cl)c(Cl)              |   |   | 0 |   |
| CN(C)c1ccc(C)cc1                                  |   |   | 1 | 0 |
| COc1ccc(C=O)cc1OC                                 |   |   | 0 | 0 |
| C[C@@H]1CCC[C@H](C)N                              |   | 0 |   |   |
| CC(=CCCC(=CCCC(C)(O)C=C)C)C                       |   |   |   | 1 |
| Oc1ccc(cc1O)[C@H]2CNc3c(O)c(O)ccc23               |   |   |   | 0 |
| Oc1ccc2ccc3c(ccc4ccc1c2c34)N(=O)=O                |   |   | 1 |   |
| Cc1c2ccccc2c(CO)c3ccc4ccccc4c13                   |   |   | 1 |   |
| NN(c1ccccc1)c2ccccc2                              |   |   | 0 |   |
| Cc1cc(c(O)c(c1)C(C)(C)C(C)(C)C                    |   |   | 0 | 1 |
| CC(CC=O)CC(C)(C)C                                 |   |   |   | 0 |
| Clc1ccc(cc1)[                                     | 1 | 0 |   |   |
| Cc1cc(O)c2C(=O)C=C(C(=O)c2c1)c3c(C)c              |   |   | 0 |   |
| Cc1nnc(NS(=                                       | 0 |   | 0 | 0 |
| CCOC(=O)C(=C)C                                    |   |   | 0 | 0 |
| CCN(Cc1cccnc1)C(=O)c2cccc(Cl)c2[C@]3(C)C(=O)N(C   |   |   |   | 1 |
| [O-][N+](=O)c1ccc2c3ccccc4cccc(c5ccccc1           |   |   | 1 |   |
| CCCCCCCCC                                         | 0 | 1 |   |   |

|                                            |   |   |   |   |   |
|--------------------------------------------|---|---|---|---|---|
| OC(=O)c1occc2cccc2)c1c3cccc3               |   |   |   | 0 |   |
| C[C@@]12CCC[C@](C)([C                      |   | 0 |   |   |   |
| OS(=O)(=O)c1cc(Nc2ccc(cc2N(=O)=O)N         |   |   | 1 |   |   |
| Nc1ccc(c(O)c1)[N+](=O)[O-]                 |   |   | 1 |   |   |
| CCCC1CCCC(=O)O1                            |   |   |   | 0 |   |
| CN(Cc1cc(Br)                               | 1 | 0 |   |   |   |
| ClC(=C)C#N                                 |   |   | 0 |   |   |
| ClCc1cc2c3cccc3c4cccc(c1)c24               |   |   | 1 |   |   |
| N[C@@H](C                                  | 0 | 0 |   |   |   |
| Nc1cccc(c1)c2cccc2                         |   |   | 1 |   |   |
| Cc1nnc(SCC2                                | 0 | 0 |   |   |   |
| COc1cccc1C                                 | 0 | 0 | 0 | 0 |   |
| O=C1CCCCO1                                 |   |   |   | 0 |   |
| NC(C(=O)O)c1cc(O)cc(O)c                    |   | 0 |   |   |   |
| Oc1cccc1N(=O)=O                            |   |   | 0 | 0 |   |
| C1CCC(CC1)(N2CCCC2)c3cc                    |   | 0 |   | 1 |   |
| CCCCc1ccc2nc(NC(=O)OC)[nH]c2c1             |   |   |   | 1 |   |
| Cc1cc(C)c2nsnc2c1N                         |   |   | 1 |   |   |
| Cc1ccnc(N)c1                               |   | 0 |   | 0 |   |
| C(CN1CCOCC1)OCCN2CCOCC2                    |   |   |   | 0 |   |
| CCCCCCC\C=C\C=O                            |   |   |   | 0 |   |
| CCCCN(=O)=O                                |   |   |   | 0 |   |
| OC(=O)\C=C(/Br)\C(=O)c1cccc1               |   |   | 1 |   |   |
| COC(=O)CCCC[C@@H]1SC                       |   | 0 |   |   |   |
| COC(=O)\C(=C\c1oc(cc1)[N+](=O)[O-])\       |   |   | 1 |   |   |
| O=N(=O)c1ccc2ccc3c4cccc4nc5ccc1c2c         |   |   | 1 |   |   |
| OC1C2OC2c3c(ccc4nc5c(ccc6cccc56)cc         |   |   | 0 |   |   |
| CC(=C)C(=O)OCc1cccc1                       |   |   |   | 0 |   |
| BrC1ccc2C3CCCCC3C=Cc2c1                    |   |   | 0 |   |   |
| CC\C(=C\C(C)(O)C=C)\C                      |   |   |   | 0 |   |
| CC1CC(=CC(C)C1C=O)C                        |   |   |   | 0 |   |
| N[C@@H](C                                  | 0 | 0 |   | 1 |   |
| COC(=O)c1oc(c2cccc2)c1c3cccc3)[N           |   |   | 1 |   |   |
| [O-][N+](=O)c1ccc2cc(c(cc2c1)[N+](=O)      |   |   | 1 |   |   |
| CC(=CCC\C(=C/C#N)\C)C                      |   |   |   | 0 |   |
| CN(C)CCc1c[nH]c2ccc(Cn3c                   |   | 0 |   | 0 | 0 |
| NNC(=O)c1ccncc1                            |   |   | 1 | 0 | 1 |
| O=C(C(c1ccc                                | 0 | 0 |   | 1 |   |
| Cc1nc2c(OCc                                | 0 | 0 |   |   |   |
| C[N+]1(C)C2                                | 0 | 0 |   |   |   |
| CCCCCCCCCCCCCCCC(=O)OC[C@@H](O)[C@H]1OC[CC |   |   |   | 0 |   |
| CN(C)c1ccc2cc3ccc(cc3nc2c1)N(C)C           |   |   | 1 |   |   |
| CCCCCCCCC(                                 | 0 | 0 |   | 0 |   |

|                                                             |   |   |   |
|-------------------------------------------------------------|---|---|---|
| <chem>O=N(=O)c1ccc(cc1)c2nc3SCCn3c2N(=O)</chem>             | 1 |   |   |
| <chem>Clc1cccc1C2</chem>                                    | 0 | 0 |   |
| <chem>Nc1nnc2[nH]c3cccc3nc12</chem>                         | 0 |   |   |
| <chem>BrC(Br)C(Br)(Br)Br</chem>                             | 0 |   | 0 |
| <chem>N\N=C\1/N=NC=C2C=CC=C[C@H]12</chem>                   | 1 |   |   |
| <chem>Cc1c(cc(c(N)c1[N+](=O)[O-])[N+](=O)[C</chem>          | 1 |   |   |
| <chem>CC(=O)OCC12CCC(=CC1OC3C(O)C(OC(=C</chem>              | 0 |   |   |
| <chem>c1ccc(nc1)c2cccnc2</chem>                             | 1 |   |   |
| <chem>ClN1C2C1c3cccc3c4cccc24</chem>                        | 1 |   |   |
| <chem>CC(C)(C#N)c1</chem>                                   | 0 | 0 | 0 |
| <chem>COc1ccc2C(=CC(=O)Oc2c1)CBr</chem>                     | 0 |   |   |
| <chem>COc1cc2nc(C</chem>                                    | 0 | 0 |   |
| <chem>CC12C=CC3=C4CCC(=O)C=C4CCC3C1CCC</chem>               | 0 |   |   |
| <chem>CCc1cc2cccc2c3ccc4C(O)C(O)C5OC5c4c</chem>             | 1 |   |   |
| <chem>CC(Cl)c1cccc1</chem>                                  | 0 |   |   |
| <chem>CN1C=CC(=O)C(=C1C)O</chem>                            |   |   | 0 |
| <chem>CCCCNCC</chem>                                        | 0 |   | 0 |
| <chem>Cc1ccc(\C=C</chem>                                    | 0 | 0 |   |
| <chem>Nc1ccc(c2cccc12)S(=O)(=O)O</chem>                     | 0 |   |   |
| <chem>Oc1cc(cc(O)c1O)C(=O)Oc2cc(cc(O)c2O)C(=O)OC[C@H</chem> |   |   | 1 |
| <chem>C(C1CO1)c2cccc2</chem>                                | 1 |   |   |
| <chem>Clc1cccnc1</chem>                                     | 0 |   |   |
| <chem>O=N(=O)c1ccc(C=Cc2cccc(c2)N(=O)=O)c</chem>            | 1 |   |   |
| <chem>NC(=O)C1=Cl</chem>                                    | 0 |   |   |
| <chem>OCCSc1cccc1</chem>                                    |   |   | 0 |
| <chem>CN(=O)(CCCl)CCCl</chem>                               | 1 |   |   |
| <chem>[O-][N+](=O)c1ccc2ccc3cc4CCC=Cc4c5cc</chem>           | 1 |   |   |
| <chem>Nc1cccc2c(N)cccc12</chem>                             | 1 |   | 1 |
| <chem>[O-]S(=O)(=O)c1ccc2cccc2c1</chem>                     |   |   | 0 |
| <chem>C\C(=C/CO)\ </chem>                                   | 0 | 0 |   |
| <chem>CCCCOC(=O)CCC(=O)OCCCC</chem>                         |   |   | 0 |
| <chem>CC=C1CC2CC1C=C2</chem>                                | 0 |   | 0 |
| <chem>CC(C)C1CCC(c</chem>                                   | 0 | 0 | 0 |
| <chem>CN1CCC(CC1)</chem>                                    | 1 | 0 |   |
| <chem>CCCC[C@H](CC)COP(=O)(Oc1cccc1)C</chem>                | 0 |   |   |
| <chem>Oc1c([nH]c2ccc(cc12)S(=O)(=O)O)C3=N</chem>            | 0 |   |   |
| <chem>CC1=C(Oc2cc(O)ccc2C1=O</chem>                         | 0 |   |   |
| <chem>CN(C)c1ccc(Cc2ccc(cc2)N(C)C)cc1</chem>                | 1 |   | 0 |
| <chem>CC(C)NCC(O)COc1cccc1OCC=C</chem>                      | 0 |   |   |
| <chem>C=COCCOCCOC=C</chem>                                  |   |   | 0 |
| <chem>CCCCCC=CCC(=O)OC</chem>                               |   |   | 0 |
| <chem>Cc1ccc(Cl)c(N</chem>                                  | 0 | 0 | 0 |
| <chem>N[C@H](C(=O)O)c1ccc(O)cc1</chem>                      |   |   | 0 |

|                                                |   |   |   |   |
|------------------------------------------------|---|---|---|---|
| CN1C(CNc2cc                                    | 0 | 0 |   |   |
| OC(=O)c1ccc(Cl)c(Cl)c1                         |   |   | 0 | 0 |
| Oc1ccccc1Cc2ccccc2O                            |   |   |   | 1 |
| CCOc1ccc2NC=C(C(=O)NCc3ccccc3)C(=O)c2n1        |   |   |   | 1 |
| COc1cc(\C=C\2/CCC\C=C/                         | 0 |   |   |   |
| CN(OC(=O)C)c1ccc(cc1)N=Nc2ccccc2               |   |   | 1 |   |
| CC(=O)c1cc(NC(=O)N)ccc1OCC(O)CNC(C             |   |   | 1 |   |
| CO\N=C(/C(=O)N[C@H]1[C@H]2SCC(=C(N2C1=O)C(=    |   |   |   | 0 |
| CCN1C(=O)N                                     | 0 | 0 |   |   |
| O=C(ON(OCc1ccccc1)C(=O)c2ccccc2)c3c            |   |   | 1 |   |
| COC1=CC(=O)OC(CCC2ccccc2)C1                    |   |   |   | 0 |
| Oc1cn2Cc3c(                                    | 0 | 0 |   | 0 |
| O=NN1CCSCC1                                    |   |   | 1 |   |
| CN([C@H]1C                                     | 0 | 0 |   |   |
| OC1CCN(CC1)N=O                                 |   |   | 1 |   |
| N[C@@H](CN1C=C(F)C(=C                          |   | 0 |   |   |
| CCCCOC(=O)CCC                                  |   |   | 0 |   |
| CN(C)CCCNc1c2ccccc2nc3c(ccc(c13)[N+            |   |   | 1 |   |
| CC(=O)N(O)c1ccc(cc1)[N+](=O)[O-]               |   |   | 1 |   |
| OCCOC[C@H                                      | 0 | 0 |   |   |
| C1OC1Oc2ccccc2                                 |   |   | 1 |   |
| OC(CC(=O)O)                                    | 0 | 0 | 0 | 0 |
| Cc1cc(ccc1N(=O)=O)N(=O)=O                      |   |   | 1 |   |
| CC(C)[C@H](NC(=O)N(C)Cc1csc(n1)C(C)C)C(=O)N[C@ |   |   |   | 0 |
| CC(C)N1C(=O)c2ccccc2C1=O                       |   |   |   | 0 |
| CCN(CCO)N=O                                    |   |   | 1 |   |
| OCCSSCCO                                       |   |   |   | 0 |
| COc1ccc(cc1)C2=NN(CCCC                         |   | 0 |   |   |
| Oc1cccc(Cl)c1Cl                                |   |   | 0 | 1 |
| Nc1cccc2c1Cc3ccccc23                           |   |   | 1 |   |
| COc1cc(cc(OC)c1O)[C@H]2[C@H]3[C@               |   |   | 1 |   |
| COC1OC1(C)C                                    |   |   | 1 |   |
| CC1CC2OC(=O)C(=C)C2C(O)C3(C)C1C=CC             |   |   | 0 |   |
| COC(=O)C1(OC1(C)C(O)C(C)C)C(=O)N               |   |   | 1 |   |
| [O-][n+]1c2ccc3ccccc3c2cc4c5ccccc5ccc          |   |   | 0 |   |
| Cc1ccc(cc1)[S+](=O)([O-])                      |   | 0 |   |   |
| OCCOCCOCC                                      | 0 | 0 | 1 | 0 |
| CNC(=O)[C@H]1O[C@H]([                          |   | 0 |   |   |
| CCCO\C=C\C=C\C=C\C=C\C=C\C=C\C=C               |   |   | 1 |   |
| Nc1ccc(C(=O                                    | 0 | 0 |   |   |
| ClCc1ccc(cc1)C#N                               |   |   | 0 |   |
| CC(C)(Br)C(Br)COP(=O)(OCC(Br)C(C)(C)F          |   |   | 0 |   |
| CC1(C)S[C@@H]2[C@H](NC(=O)C(C(=O)Oc3ccc4CCC    |   |   |   | 0 |

|                                            |   |   |   |
|--------------------------------------------|---|---|---|
| CCOC(=S)SSC                                | 0 | 0 | 0 |
| C[C@@H]1C                                  | 0 | 0 |   |
| Fc1ccc2OCC[                                | 0 | 0 | 0 |
| BrCCC(Br)Br                                |   |   | 1 |
| COC(=O)C12CC1(C=O)C(C=O)C=C3CC(C)(         |   |   | 1 |
| N[C@@H]([C@H]1C[C@H                        | 0 |   |   |
| CCCC[C@H](CC)C(=O)O                        |   |   | 0 |
| CC(C)[C@H]1CC[C@@H](C)CC1=O                |   |   | 0 |
| OC(=O)c1ccc                                | 0 | 0 | 0 |
| CC1(C)COP(Oc2ccccc2)OC1                    |   |   | 0 |
| CC(C)(C)OOC1(C)C=C(C(=O)C(=C1)C(C)(C       | 0 |   |   |
| OCN1C(NC(=                                 | 0 | 0 | 0 |
| O[S+](=O)([O-])CCS                         |   | 0 |   |
| ClC(=O)c1ccc(Cl)cc1                        |   |   | 0 |
| CCc1cnc(C2=NC(C)(C(C)C)C(=O)N2)c(c1)C(=O)O |   |   | 0 |
| CCCCCCCCCCCCCS(=O)(=O)Oc1ccccc1            |   |   | 0 |
| NC(CO)(CO)C                                | 0 | 0 | 0 |
| CCCCCCCCc1ccc(O)cc1                        |   |   | 1 |
| CC1=C2C(O)C(C)(CO)C=C2C(=O)C(C)(O)C        |   |   | 1 |
| CC(=C)C(=O)OCC1CCCO1                       |   |   | 0 |
| NC(=N)NN=C                                 | 1 | 0 |   |
| N[C@@H](CCCCP(=O)(O)C                      |   | 0 |   |
| Nc1ncnc2c1ncn2Cc3ccc(cc3)[N+](=O)[O        |   |   | 1 |
| Cc1ccc2cc3ccccc3c(C)c2c1                   |   |   | 1 |
| Nc1ccc(Nc2ccc(cc2)[N+](=O)[O-])cc1         |   |   | 1 |
| Cc1ccc(cc1[N+](=O)[O-])[N+](=O)[O-]        |   |   | 1 |
| CCCCCCCCCCCCCCCC(=O)OCC1=CC=C2             |   |   | 1 |
| S(c1ccccc1)c2ccccc2                        |   |   | 0 |
| Nc1c2CCCCc2nc3ccccc13                      | 0 |   | 1 |
| CCN(CC)CCn1nc2c3ccc(Cl)cc3Sc4c(CO)cc       |   |   | 1 |
| CSc1nc(N)c2                                | 0 |   |   |
| Oc1ccc2c(OC(=O)c3c2oc4cc(O)ccc34)c1        |   |   | 0 |
| O1C(C1c2ccccc2)c3ccccc3                    |   |   | 0 |
| OC(=O)C1=Cl                                | 0 | 0 | 0 |
| CC(C)OS(=O)(=O)c1ccc(C)cc1                 |   |   | 1 |
| CC(=CCC1C(=                                | 0 | 0 |   |
| C[C@H](CCC#N)C#N                           |   |   | 1 |
| CCN1CCCC1CNC(=O)c2cc(c                     |   | 0 |   |
| Oc1cccc(O)c:                               | 0 | 0 | 1 |
| Clc1cccc(Cl)c1C#N                          |   |   | 0 |
| CN(COC(=O)C)[N+](=O)[O-]                   |   |   | 1 |
| CC(C)C[C@H](NC(=O)C)C(=O)O                 |   |   | 0 |
| CCCCCCCCCCCCCCCC[n+]1c                     |   | 0 |   |

|                                                  |   |   |   |
|--------------------------------------------------|---|---|---|
| Oc1ccc2ccccc2c1N=Nc3ccc(cc3)S(=O)(=O)C           | 0 |   |   |
| OCCN(CCO)c1nc(Nc2ccc(cc2)S(=O)(=O)[O-])nc(Nc3ccc |   |   | 0 |
| COc1cc(C=C2CCCC(=Cc3ccc(O)c(OC)c3)C2=O)ccc1O     |   |   | 1 |
| Cc1cc2nccnc2c3nc(N)n(C)c13                       |   | 1 |   |
| [O-][N+](=O)c1ccc(\C=C\c2ccc(Cl)cc2)cc1          |   | 1 |   |
| c1ccc2cc3cc4ccccc4cc3cc2c1                       |   | 1 |   |
| CCCCOC(=O)CCCCCCCC(=O)OCCCC                      |   |   | 0 |
| CCc1cccc(c1)                                     | 1 | 1 | 0 |
| CC[C@@H](C                                       | 0 | 0 |   |
| CC1(C)CC(C(=O)N)C(C)(C)N1O                       |   |   | 0 |
| CN(C)c1ccc(c                                     | 0 | 0 | 0 |
| Oc1c(Br)cc(Br)cc1c2cc(Br)cc(Br)c2OP(=            |   | 0 |   |
| C[C@]1(O)CC[C@H]2[C@@H]3CCC4=CC(=O)CC[C@]4       |   |   | 0 |
| CN(C)CCCNc1c2ccccc2nc3c(ccc(c13)[N+              |   | 1 |   |
| COc1cc(OC)c2C3C(OC4OC34)Oc2c1                    |   | 1 |   |
| CCCCC(=O)OC1(CCC2C3CCC4=C(CCC(=C                 |   | 0 |   |
| O=S1(=O)OCCCCO1                                  |   | 1 |   |
| CCC=O                                            |   | 0 | 0 |
| CN(C(=O)C)c1c(I)c(NC(=O)C)c(I)c(C(=O)N[C@H]2C(O) |   |   | 0 |
| Cc1ccc(N)cc1N                                    |   | 1 | 1 |
| CCCCCCI                                          |   |   | 0 |
| NC(=N)c1ccc(OCCCOc2ccc(cc2Br)C(=N)N)c(Br)c1      |   |   | 0 |
| C1c2ccccc2c3ccccc13                              |   | 0 | 0 |
| C=CCCC#N                                         |   |   | 0 |
| CCOC(=O)[C@H](CCc1ccccc1)N[C@@H](C)C(=O)N2C      |   |   | 0 |
| CCC1(CC(=O)O)OCCc2c1[nH]c3c(C)cccc2              |   | 0 |   |
| C[C@]12CCC(=O)C=C1C=C[C@@H]3[C@@H]2CC[C@         |   |   | 0 |
| [O-][N+](=O)c1ccc(cc1)c2nc3sccn3c2N=             |   | 1 |   |
| CNC(=O)N(O)C(=O)NC                               |   | 0 |   |
| Nc1ccc(cc1)c2ccccc2                              |   | 1 | 0 |
| OC(=O)c1ccccc1                                   |   | 0 | 0 |
| COc1c(O)cc2C(=O)c3ccccc3C(=O)c2c1C               |   | 1 |   |
| Nc1ccc(cc1)S                                     | 0 | 0 | 0 |
| NC(=N)NNc1ccc(cc1)N=NC(=S)N                      |   | 1 |   |
| CCN1C[C@]2(COC(=O)c3c                            |   | 0 |   |
| CCCN1C(=O)I                                      | 0 |   |   |
| CCCC(=O)OC                                       |   |   | 0 |
| OC1C=Cc2c(cc3ccc4c(ccc5ccc2c3c45)N(:             |   | 1 |   |
| Cn1cnc2f(F)c(Nc3ccc(Br)cc3Cl)c(cc12)C(=O)NOCCO   |   |   | 0 |
| N(Nc1ccccc1)c2ccccc2                             |   | 1 | 0 |
| Oc1ccc(C[C@                                      | 0 | 0 | 0 |
| CCSC(=O)N(CC(C)C)CC(C)C                          |   |   | 0 |
| ClCc1ccc(Cl)cc1                                  |   | 0 |   |



|                                                            |   |   |
|------------------------------------------------------------|---|---|
| CC(=O)Nc1ccc(Sc2ccccc2)cc1                                 | 1 |   |
| C[C@]12CC[C@H]3[C@@H](CCC4=CCCC[C@H]34)[C@H]1C2            |   | 1 |
| CC(=O)CC(=O)Nc1ccccc1C                                     | 0 | 0 |
| CCOO                                                       | 1 |   |
| CO[C@@]1(I)C(=O)C1                                         | 0 | 0 |
| Cc1ccc(cc1)[C@@H]2CO2                                      | 1 |   |
| Ic1ccccc1CN(C)C                                            | 1 | 1 |
| CCC(=O)OCc1ccc(cc1)N(=O)=O                                 | 1 |   |
| CCN(N)CC                                                   | 0 |   |
| CCOc1ccc(NS(=O)(=O)c2ccc(N)cc2)nn1                         |   | 0 |
| Nc1ccc(cc1)c1ccc(O)cc1                                     | 0 | 0 |
| CO\N=C(/C(=O)N[C@H]1[C@H]2SCC(=C(N2C1=O)C(=O)N)C1=O)C(=O)N |   | 0 |
| Cl[C@@H]1CO1                                               | 1 |   |
| OC1C=C2c3ccc4ccccc4c3c5cccc(C1O)c25                        | 1 |   |
| Cc1ccccc1NO                                                | 1 |   |
| COc1ccc(C=Cc2ccc(cc2)N(=O)=O)c1                            | 1 |   |
| O=C1CSC(=S)N1                                              | 0 |   |
| CCCCCCCCCCCCOCCOS(=O)(=O)[O-]                              |   | 0 |
| CCOC(=O)C1=C(C)NC(=C(C)C)C1                                | 0 |   |
| COc1cc(NS(=O)(=O)C)ccc1Nc2c3ccc(cc3)C(=O)N2                | 1 |   |
| Nc1ncnc2nc([nH]c12)c3ccc(cc3)N(=O)=O                       | 1 |   |
| OC(=O)CCCCCCCCC(=O)O                                       |   | 0 |
| CN(C)CCCN1C(=O)N1                                          | 1 | 1 |
| CO[C@@H](I)C1=CC=CC=C1                                     | 0 | 0 |
| CC(Br)C(=O)N(C)Cc1ccccc1                                   | 0 |   |
| [O-][N+](=O)c1cc(F)ccc1F                                   | 1 |   |
| COc1ccc2c1cc(c3c(cc4OC(=O)C4)C(=O)N2)C(=O)N1               | 0 | 1 |
| CCCCC(CC)COP(=O)OCC(CC)CCCC                                |   | 0 |
| OC1C(O)c2cc3cc(ccc3cc2CC1=O)[N+](=O)C1=CC=CC=C1            | 0 |   |
| COC(=O)c1ccc(c2C(=NCCCN(C)C)c3ccccc3)cc1                   | 1 |   |
| ON1CN(Cl)CN(Cl)C1                                          | 0 |   |
| CN(C)[S+](=O)([O-])c1cc(c1)C(=O)N                          | 0 |   |
| CC(CO)CO                                                   |   | 0 |
| CCCCCCCCCCCCCCCCBr                                         |   | 0 |
| OC1=C(O)c2cc(O)cc21                                        | 1 | 0 |
| COc1ccc2C=C3N(Cc4cc5OCOc5cc34)Cc1                          | 0 |   |
| CC1=C(N2[C@H](O)C(=O)N2)C(=O)N1                            | 0 | 0 |
| COC(=O)C1=C(C)NC(=C(C1c2ccccc2)N(=O)=O)C1                  | 0 |   |
| COC(=O)c1oc(N)c(Cl)c1Cl                                    | 0 |   |
| C\C=C(\C(=C\C)\c1ccc(O)cc1)/c2ccc(O)cc2                    | 0 | 1 |
| CC(O)C1C2SC(=C(N2C1=O)C(=O)O)C3CC                          | 0 |   |
| CC(C(=O)OCC(=O)N(C)C)c1ccc2Oc3nc(C)ccc3Cc2c1               |   | 0 |
| CCCCC(CC)COC(=O)C                                          |   | 0 |

|                                              |   |   |   |
|----------------------------------------------|---|---|---|
| CN1C(=O)N(                                   | 0 | 0 | 0 |
| OCCN(CCO)C=O                                 |   |   | 0 |
| OC1CCCc2c1cc3ccc4ccc(c5ccc2c3c45)[N          | 1 |   |   |
| NC(=O)c1cccc1[N+](=O)[O-]                    | 1 |   |   |
| Nc1ncnc2c1ncn2c3ccc(cc3[N+](=O)[O-]          | 1 |   |   |
| CC(C)CCC[C@@H](C)[C@@H]1CC[C@H]              | 1 |   |   |
| CC(=O)[C@@                                   | 0 | 0 |   |
| O=C1NC=CC(=O)N1                              |   |   | 0 |
| CN1C(=O)CN2CCc3ccccc3C                       |   | 0 | 0 |
| CC(C)Br                                      | 1 |   | 0 |
| ONc1ccc(cc1)N=Nc2ccccc2                      | 1 |   |   |
| CC(=O)N[C@H]1C(O)O[C@                        | 0 |   | 0 |
| Oc1cc2c3ccccc3ccc2c4ccccc14                  | 1 |   |   |
| CC(C)NC(=O)NS(=O)(=O)c1cnccc1Nc2cc           | 0 |   | 0 |
| CCC1=CN(C2(                                  | 0 | 0 |   |
| COc1cccc2C(=O)c3c(O)c4C(CC(O))(Cc4c(         | 1 |   |   |
| O=C(C1OC1c2ccc(cc2)N(=O)=O)c3ccccc:          | 0 |   |   |
| c1ccc2c(c1)ccc3cc4ccc5ccncc5c4cc23           | 1 |   |   |
| COc1cc(ccc1O)c2nc(c3ccccc3)c([nH]2)c4        | 1 |   |   |
| O=N(=O)O[C@@H]1CO[C@@H]2[C@H](CO[C@H]12      |   |   | 0 |
| CCCOC(=O)c1cc(O)c(O)c(O)c1                   | 0 |   | 1 |
| N=C1NC=C(S1)N(=O)=O                          | 1 |   |   |
| CCCCOC(=O)C(=C)C                             | 0 |   | 0 |
| CCCCN(N=O)[C@@H](CCC)OC(=O)C                 | 1 |   |   |
| CCCCCCCCS(=O)[C@H](C)Cc1ccc2OCOC2            | 0 |   |   |
| NCC(=O)CCC(                                  | 0 | 0 | 0 |
| C[C@@H](O)[C@@H]1[C(                         | 0 |   | 0 |
| CCC(O)c1ccc(                                 | 0 | 0 | 0 |
| COc1ccc(CCC                                  | 1 |   |   |
| CN(C)CCOC(=O)C(c1cccc1)C2(O)CCCC2            |   |   | 0 |
| O=C(OCc1cccc1)c2cccc3cccn23                  | 0 |   |   |
| CC(=O)OCC(=O)[C@@]1(O)CCC2C3CCC4=CC(=O)CC[C  |   |   | 0 |
| CC(C)(C)N                                    | 0 |   | 0 |
| CN(C)CCO[C@H](c1cccc1)c2cccc2C               | 0 |   |   |
| Nc1cc(Cl)c(O)c(Cl)c1                         |   |   | 1 |
| Cc1ccc(N)cc1N=[N+](O-)]c2cc(N)ccc2C          | 1 |   |   |
| Cc1c(cc(N)cc1N(=O)=O)N(=O)=O                 | 1 |   |   |
| CCCCCOC(=O)c1cccc1                           | 0 |   | 0 |
| O[C@@H]1C=Cc2c(ccc3c2ccc4ccccc34)[           | 1 |   |   |
| CC(=C(Cl)C=O)C                               | 1 |   |   |
| Cc1onc(c1)C(                                 | 0 | 0 | 0 |
| C[N@+]1([O-                                  | 0 | 0 |   |
| CC1=C(N2[C@H](SC1)[C@H](NC(=O)[C@H](N)c3ccc( |   |   | 0 |

|                                                |   |   |   |
|------------------------------------------------|---|---|---|
| Oc1cc2C(CN(                                    | 1 | 0 |   |
| [O-]S(=O)(=C                                   | 0 | 0 | 0 |
| ClC(=O)\C=C\C(=O)Cl                            |   |   | 0 |
| [O-][N+](=O)c1ccccc1C#N                        |   |   | 0 |
| NC(CCCP(=O)                                    | 0 | 0 |   |
| [O-][N+](=O)c1ccc(C=O)c(c1)[N+](=O)[(          |   | 1 |   |
| CC(C)(C)c1cci                                  | 0 | 1 | 0 |
| CC(=O)O[C@H](C=C)c1ccc2OCOc2c1                 |   | 1 |   |
| CCCCCCCCCCCCOCCOCCOC                           |   | 0 |   |
| OC[C@H](O)CCl                                  |   | 1 |   |
| COP(=O)(OC)O\C=C/C(=O)O[C@@H](C                |   | 0 |   |
| Cc1c(N)cc(cc1[N+](=O)[O-])[N+](=O)[O           |   | 1 |   |
| CN(N=O)C(=O)NC1C(O)OC(CO)C(O)C1O               |   | 1 |   |
| CC(C)CCCCCCCOC(=O)c1ccc(C(=O)OCCCCCCCC(C)C)c(c |   |   | 0 |
| CO[C@]12C[                                     | 1 | 0 | 0 |
| CCCCC[N+](=O)[O-]                              |   | 0 |   |
| CCOC(=O)C(=O)OCC                               |   |   | 0 |
| ClC1=C(Cl)C2                                   | 1 | 0 | 1 |
| O=N(=O)c1nc2ccccc2[nH]1                        |   |   | 1 |
| COc1nsc2ccc(OCC3CO3)cc12                       |   |   | 1 |
| CCSCC(N)C(=O)O                                 |   |   | 0 |
| N=C1Nc2ccc(cc2S1)N(=O)=O                       |   |   | 1 |
| c1ccc2c(c1)c3cc4ccccc4c5cc6ccccc6c2c3          |   |   | 1 |
| Cn1cnc2c3cccn3ccc12                            |   |   | 1 |
| O=C1Nc2cccr                                    | 1 | 1 |   |
| CCO[P@](=O)(Oc1ccc(cc1)[N+](=O)[O-]            |   | 1 |   |
| Nc1c(Br)cc(B                                   | 0 |   | 0 |
| Cc1ccc(C=O)cc1C                                |   |   | 0 |
| NC1=CC(=O)C(=O)c2ccccc12                       |   |   | 1 |
| COc1ccccc1N2CCN(CC3CN                          |   | 0 |   |
| CSc1nc(N)c2ncn([C@@H]:                         |   | 0 |   |
| CC(=O)CN(COC(=O)C)N=O                          |   |   | 1 |
| OO[C@@H]1CCCC2ccccc12                          |   |   | 1 |
| CC[C@H](C)C(=O)O[C@H]1C[C@H](O)C=C2C=C[C@H]    |   |   | 0 |
| CC(=CC(=O)O)C                                  |   |   | 0 |
| CCC(Cl)CC(Cl)CC(C)Cl                           |   |   | 0 |
| COP(=O)(OC)O\C=C/Cl)\c1cc(Cl)c(Cl)cc           |   |   | 0 |
| Cc1c(nn(c2ccc(Cl)cc2Cl)c1c                     |   | 1 |   |
| C1COCCO1                                       |   |   | 0 |
| O=N(=O)C1=Cc2c3c1cccc3cc4ccc5ccccc5            |   |   | 1 |
| O=C=Nc1cccc2c(cccc12)N=C=O                     |   |   | 0 |
| OC[C@H]1NC[C@@H](O)                            |   | 0 |   |
| COC(=O)c1ccccc1Cl                              |   |   | 0 |

|                                                   |   |   |   |
|---------------------------------------------------|---|---|---|
| CC1(C)CCC=[I                                      | 0 | 0 |   |
| CCCOC(=O)c1cc(Cc2ccc(N)c(c2)C(=O)OC               |   |   | 0 |
| OC(=O)c1ccc(\C=C\C(=O)CCC#N)cc1                   |   |   | 0 |
| CN(C(=O)c1csc(c1)N(=O)=O)c2ccccc2                 |   |   | 1 |
| O=C1NNC(=O)c2ccccc12                              |   |   | 0 |
| CCN1C=C(C(=O)O)C(=O)c2cc(F)c(c(F)c1:              |   |   | 0 |
| CC[C@H]1C[C@@H]2C[C@H]3[C@H]1N(CCc4c3[n]          |   |   | 0 |
| CC(=O)O[C@H]1C[C@H]2CC[C@H]3[C@H](CC[C@           |   |   | 0 |
| NCCO\C=C\[C@H](N)C(=O)O                           |   |   | 0 |
| CCCCCCC\C=C\CCCCCCCC(=O)OCCOCC1                   |   |   | 0 |
| OC[C@@H](O)[C@@H](O)[C@H](O)[C@@H](O)C(=          |   |   | 0 |
| [O-][N+](=O)c1cc(cc(c1Cl)[N+](=O)[O-]             |   |   | 0 |
| [O-][N+](=O)c1oc(\C=N\N2CCCNC2=O)c                |   |   | 1 |
| CN1C(=O)N(CC=C)C(=O)c2                            |   |   | 0 |
| [O-][N+](=O)c1ccc2C(=O)c3ccccc3c2c1               |   |   | 1 |
| OCN1C(=O)c2ccccc2C1=O                             |   |   | 0 |
| COc1ccccc1NC(=O)[C@H](N=Nc2ccc(cc:                |   |   | 0 |
| COc1cccc(CN2C3C2c4ccccc4c5ccccc35)c               |   |   | 1 |
| CN(C)c1nc(N)c(nc1Cl)C(=C                          |   |   | 0 |
| CC(C)CCON=                                        | 0 | 0 | 1 |
| NCc1ccc(cc1)[S+](=O)(N)[                          |   |   | 0 |
| CC(=O)Nc1cc                                       | 0 | 0 | 0 |
| c1ccc2c(c1)ccc3c4ccccc4sc23                       |   |   | 1 |
| Nc1cccc2nc3c(N)cccc3nc12                          |   |   | 1 |
| C[C@]12CC[C@H]3[C@@H](CCC4=CC(=O)CC[C@]34C        |   |   | 0 |
| CC(C)S(=O)(=O)Cl                                  |   |   | 1 |
| FC(F)(F)c1cc                                      | 1 | 0 |   |
| CC(C)C(Nc1ccc(cc1Cl)C(F)(F)F)C(=O)OC(C#N)c2cccc(C |   |   | 1 |
| CC(C)Oc1cccc(c1)N2C(=Nc                           |   |   | 0 |
| CN1N(C(=O)(                                       | 0 | 0 | 0 |
| [O-][N+](=O)c1ccc(\C=C\C(=O)cc1                   |   |   | 1 |
| CCN1C(=CC=Cc2ccc3ccccc3[n+]2CC)C=Cc4ccccc14       |   |   | 1 |
| CCC(C)c1cccc(C(C)CC)c1O                           |   |   | 1 |
| C\C=C\C\C=C/C/CCCCCCCCOC(=O)C                     |   |   | 0 |
| Oc1ccc(c(c1)[N+](=O)[O-])[N+](=O)[O-]             |   |   | 1 |
| Cc1nc2cc(Cl)ccc2[nH]1                             |   |   | 1 |
| Cn1c(N)nc2c3cnccc3ccc12                           |   |   | 1 |
| CCOc1nc2cccc(C(=O)O)c2r                           |   |   | 0 |
| OCC(=O)N(O)c1ccc(Cl)cc1                           |   |   | 0 |
| COC(=O)C1=C(C)N=C(C)C(=C(O)OCCc2cc                |   |   | 0 |
| Fc1cccc(F)c1C#N                                   |   |   | 0 |
| CCO\N=C(\CC)/C1=C(O)CC(CC1=O)c2c(C)cc(C)cc2C      |   |   | 0 |
| Nc1ccc2cc(cc(O)c2c1N=Nc3ccc(cc3)c4c               |   |   | 1 |

|                                                |   |   |
|------------------------------------------------|---|---|
| CCCCC(C)C(OC(=O)CC(CC(=O)O)C(=O)O)             | 0 |   |
| BrCC(=O)c1cccc1                                | 0 | 0 |
| Cc1cc(cc(C)c1CC2=NCCN2)C(C)(C)C                |   | 0 |
| NC(=O)\C=C\c1oc(cc1)[N+](=O)[O-]               | 1 |   |
| CC(C)CCOC(=O)\C=C/c1cccc1                      | 0 |   |
| CN(C)CCNC(=O)c1cccc2oc(nc12)c3cccc:            | 0 |   |
| NC(=N)NS(=O)(=O)c1ccc(N)cc1                    | 0 | 0 |
| CC(C)OC(=O)Nc1cccc1                            |   | 0 |
| [O-]P(=O)([O-])OP(=O)([O-])OP(=O)([O-])[O-]    |   | 0 |
| CCCCCCCCCCCCOC(=O)C[N+](CC)(CC)CC              | 0 |   |
| Clc1ccc(nn1)                                   | 0 | 0 |
| CCCN[C@@H](C)C(=O)Nc1                          | 0 |   |
| Cc1ccc2cc3c(ccc4cccc34)c5CC(O)c1c25            | 0 |   |
| NCc1cccc(CN)c1                                 | 0 | 0 |
| Cc1cc(C)cc(O)c1                                | 0 | 0 |
| C(c1cccc1)n2ccnc2                              | 1 |   |
| CC1CCCC(=O)C1=O                                |   | 0 |
| NC1=NC2=C(N=CC(=O)N2)                          | 0 |   |
| COc1cc(\C=C/C)ccc1O                            | 0 |   |
| Cc1nccn1c2ccc(Sc3cccc(c3)C4(CCOCC4)C(=O)N)cc2  |   | 0 |
| CC[C@H]1OC(=O)C[C@@H](O)[C@H](C)[C@@H](O)[     |   | 0 |
| C[C@H](Cc1cccc1)Nc2ncr                         | 0 |   |
| Nc1nc(N)c(n                                    | 1 |   |
| C\C=C/C=C/C=C(\C)/C=C/C=C(\C)/C=CC1=C(C)CCCC1( |   | 0 |
| CCC(=O)OC(=O)CC                                |   | 0 |
| ON(C=O)c1ccc2cccc2c1                           | 1 |   |
| [O-][N+](=O)c1ccc2Cc3cccc3c2c1                 | 1 |   |
| CC(CCC(=O)O)C1CCC2C3C(CCC12C)C4(C)             | 0 |   |
| CC(C)(NC(=O                                    | 1 |   |
| C[C@H](NC[C@H](O)CP(=                          | 0 |   |
| CC1=CC(O)CC(C)(C)C1                            |   | 0 |
| Cc1ccc2cc3ccc4cccc4c3nc2c1                     | 1 |   |
| Clc1cc(Cl)c(Cl)cc1Cl                           | 0 | 0 |
| COc1cc2c(C=O)c3N(C)CCc4                        | 0 |   |
| O=N(=O)c1cccc2c3cccc3[nH]c12                   | 1 |   |
| CC(=O)OCc1ccc(cc1)N(=O)=O                      | 1 |   |
| ClC1=C(Cl)[C@@]2(Cl)[C@H]3COS(=O)OC[C@H]3[Ce   |   | 1 |
| CCCCCCCCCCCCCCCC                               | 0 |   |
| Cc1c(OCC(F)(F)F)ccnc1[S                        | 0 |   |
| C[C@@H](O)C(=O)C                               | 0 |   |
| CCCN(CCC)[C@H]1CCc2c(F                         | 0 |   |
| CN(C)CCNC(=O)c1cccc2nc3cccc3nc12               | 1 |   |
| Cc1cccc1CN                                     | 0 | 0 |

|                                                   |   |   |   |
|---------------------------------------------------|---|---|---|
| S=C=Nc1ccc(                                       | 0 | 0 | 0 |
| Fc1ccc(cc1N(=O)=O)N(=O)=O                         |   |   | 1 |
| OC1=C(Oc2cc                                       | 0 | 0 |   |
| Cc1c(N)cccc1N(=O)=O                               |   |   | 0 |
| Clc1ccc(NS(=O)(=O)c2cccc3cccnc23)c(Cl             |   |   | 0 |
| Nc1cccc2c3cccc4cccc(c12)c34                       |   |   | 1 |
| CC(=O)Nc1ccc2c3ccc(O)cc3c4cccc1c24                |   |   | 1 |
| [O-][N+](=O)c1ccc(cc1)C(=O)\N=C\2/SI              |   |   | 1 |
| OC1(CCN(CCCC(c2ccc(F)cc2)c3ccc(F)cc3)CC1)c4ccc(Cl |   |   | 1 |
| CC(C)[C@@H]1CC=C(C)[C@H]2CC=C(C)(                 |   |   | 0 |
| Oc1nc(O)c2n                                       | 0 | 0 |   |
| OC(=O)CCCC(                                       | 0 | 0 | 0 |
| O=N(=O)c1ccc2c(Cc3ccccc23)c1                      |   |   | 1 |
| COc1ccc(CN(CC[N+](C)(C)[O-])c2ccccn2              |   |   | 0 |
| O=C1c2ccccc2c3c1ccc4ccc5ccccc5c34                 |   |   | 0 |
| CC(=O)Nc1ccc(Oc2ccc(cc2)[N+](=O)[O-]              |   |   | 1 |
| CC[N+](=NC)[O-]                                   |   |   | 0 |
| OC=Nc1nc(cs1)c2oc(cc2)N(=O)=O                     |   |   | 1 |
| Nc1nc(NO)c2[nH]cnc2n1                             |   |   | 1 |
| CN(NO)C(=O)c1ccccc1                               |   |   | 1 |
| CCCCN(CCC(=O)O)N=O                                |   |   | 1 |
| O=C(CCN1CC                                        | 1 | 0 | 0 |
| [O-]C(=O)CC[                                      | 0 |   |   |
| CNC(=O)NC                                         |   |   | 0 |
| COc1cc(cc(OC)c1O)[C@H].                           |   | 0 |   |
| Cl[C@H]1OCCO[C@@H]1Cl                             |   |   | 0 |
| N[C@@H](Cc1ccc(cc1)N(C                            |   | 0 |   |
| CN1C(=O)COc2c1cc(Cl)cc2                           |   | 0 | 0 |
| CCCCN(N=O)C(CCC)OC(=O)C                           |   |   | 1 |
| [O-][N+](=O)c1c2ccccc2cc3ccccc13                  |   |   | 1 |
| OC1(CCCCC1)C#C                                    |   |   | 0 |
| CC(C)(S)C(=O)NC(CS)C(=O)O                         |   |   | 0 |
| CN1\C(=N\N)\Sc2ccccc12                            |   |   | 1 |
| CC(=O)N[C@@H](CC(=O)C                             |   | 0 |   |
| OC1C(=O)C(=O)C1=O                                 |   |   | 0 |
| COc1ccc2ncc                                       | 1 | 0 |   |
| O=N(=O)c1ccc2oc3ccc(cc3c2c1)N(=O)=(               |   |   | 1 |
| Nc1ccc2nc3cc(N)ccc3nc2c1                          |   |   | 1 |
| CCC(=O)O[C@@]1([C@@H](C)C[C@H]2[C@@H]3C[C         |   |   | 1 |
| NC1(C[C@H]([C@H](C1)C(                            |   | 0 |   |
| Cc1cc(c(C)c2c3ccccc3[nH]c12)[N+](=O)[             |   |   | 1 |
| CC(C)[C@H](                                       | 1 |   | 1 |
| Cc1cc(C)cc(c1)N=Nc2c(O)ccc3ccccc23                |   |   | 0 |

|                                                |   |   |   |
|------------------------------------------------|---|---|---|
| COc1cccc2c1cc3N([C@@H]4O[C@H](C                | 0 |   |   |
| NC1=NC(=O)N(C=C1)C2CO[C@H](CO)O2               |   |   | 0 |
| CIN1C(=O)N(                                    | 0 | 0 | 0 |
| CC1OC(OCC2OC(OC3=C(Oc4cc(OCCO)cc               | 0 |   |   |
| C1CC(CCl)OP(=O)(OC(CCl)C(Cl)OC(CCl)C(Cl        | 1 |   |   |
| [O-][N+](=O)c1cccc2c1ccc3ccccc23               | 1 |   |   |
| CCSS\C=C('                                     | 1 | 0 |   |
| CN1CC(=C[C@@H]2[C@H]1Cc3c[nH]c4c               | 1 |   |   |
| CO\N=C(/C(=O)N[C@H]1[C@H]2SCC=C(N2C1=O)C(=C    |   |   | 0 |
| Cc1ccc(cc1)S                                   | 0 |   | 0 |
| CC(C)OCC1CO1                                   | 1 |   | 0 |
| Cc1cc(N)sn1                                    | 1 |   |   |
| ClC\C=C\CCl                                    | 1 |   | 0 |
| Cc1ccc2c(C)c3ccc4C(O)C(O)C=Cc4c3nc2c           | 1 |   |   |
| COc1cc(\C=C\C(=O)OC2CCC34CC35CCCC6             | 0 |   |   |
| OC(=O)C(Cl)Br                                  | 1 |   |   |
| CC(C)CC1NC(=O)C(CCCN)N                         | 1 |   |   |
| CN(N=O)C(OC(=O)C)C(=O)C                        | 1 |   |   |
| C[S+](C)CCC(N)C(=O)O                           |   |   | 0 |
| CCOc1ccc2nc(sc2c1)[S+](=                       | 0 |   |   |
| CC(Cc1ccc(OCC(=O)O)cc1)NCC(O)c2csc(n2)C(F)(F)F |   |   | 0 |
| CC1(C)CC2C(O)(C1)C=C(C=O)C34CC23C(-            | 1 |   |   |
| CC=C(C)C(=O)OCCC(C)CCC=C(C)C                   |   |   | 0 |
| COC1CC2CN3                                     | 1 |   |   |
| Oc1ccc(cc1)C(=O)\C=C\c2ccccc2                  | 0 |   |   |
| Oc1ccc(cc1)C2CC(=O)c3c(C                       | 0 |   | 0 |
| COc1ccc(cc1OC)C(=O)N2CCN(CC2)c3ccc             | 0 |   |   |
| Cn1ccnc1S                                      | 0 | 0 | 0 |
| Oc1c2nc3ccccc3c2nnc1\N=C\c4ccc(Cl)c            | 1 |   |   |
| CNC(=NCCSCc1oc(CN(C)C)cc1)C=N(=O)C             | 0 |   |   |
| CCN(CC)C(=O                                    | 0 | 0 |   |
| OCC1O[C@H                                      | 0 | 0 |   |
| OCCCCOC(=O)C=C                                 |   |   | 0 |
| [O-][S+](=O)(N1CCCNCC1)                        | 0 |   |   |
| C[C@H](NCCc1ccc(O)cc1)[                        | 0 |   |   |
| Oc1ccc2ccc3[nH]c4cc(c5ccccc5c4c3c2c1           | 1 |   |   |
| CCOC(=O)C1-                                    | 0 | 0 |   |
| ClCc1cccc2c3cccc4cccc(c12)c34                  | 1 |   |   |
| Nc1nc(Cl)nc2                                   | 0 |   |   |
| CN1C(=O)C=C(NCCN(CCO)CCCc2ccc(cc2)N(=O)=O)N(C  |   |   | 0 |
| COCCO                                          | 0 |   |   |
| Cc1cccc2cc3ccc4ccccc4c3nc12                    | 0 |   |   |
| O[C@H]1C=C                                     | 0 | 0 | 0 |

|                                                 |   |   |
|-------------------------------------------------|---|---|
| CC1=C(CCN2CCCC(C2)c3noc4cc(F)ccc34)C(=O)N5CCCC[ | 0 |   |
| CC1(C)S[C@@H]2[C@H](NC(=O)[C@@H](c3ccccc3)S     | 0 |   |
| CCCCCCCC\C=C/CCCCCCCC(=O)OCCO                   | 0 |   |
| CCC[C@H]1C                                      | 0 | 0 |
| CCN(CC)CCCC(C)Nc1cc(OC)cc2cccnc12               | 1 |   |
| Nc1ccc(Oc2c(Cl)cc(Cl)cc2Cl)cc1                  | 1 |   |
| CCCCc1ccc(N)cc1                                 |   | 0 |
| Cc1c2C3OC3c4ccccc4c2c(C)c5ccccc15               | 1 |   |
| Clc1ccc(Cl)c1C=O                                | 0 | 0 |
| OC[C@@H]1                                       | 0 | 0 |
| CC(O)C(CO)C(C)O                                 |   | 0 |
| CC(=O)OCc1ccccc1                                | 0 | 0 |
| CCCNC(=N)NCCC[C@H](N)                           | 0 |   |
| CCCCCCCCOC(=O)C(=C)C                            | 0 |   |
| CCCCCCCCC                                       | 0 | 0 |
| [O-][N+](=O)c1ccc2c(c1)c3cc4ccccc4c5c           | 1 |   |
| OS(=O)(=O)Oc1ccc2ccc3cc4ccccc4c5ccc             | 1 |   |
| COC(=O)c1ccccc1S(=O)(=O)NC(=O)N(C)c2nc(C)nc(OC  |   | 0 |
| CCC(=O)NCc1ccccc1                               | 0 |   |
| CC(C)CCOS(=O)(=O)C                              | 1 |   |
| Fc1cccc2c3c(ccc12)c4cccc5cccc3c45               | 1 |   |
| [O-][N+](=O)c1ccc2nc3c(cc2c1)c4ccccc5c          | 1 |   |
| CN(C)CCCN(C)CCCN(C)C                            |   | 0 |
| CCN(CCCc1cc                                     | 1 | 0 |
| OCc1cccc(c1)[N+](=O)[O-]                        | 0 |   |
| Oc1ccc(Nc2ccc(cc2[N+](=O)[O-])[N+](=            | 1 |   |
| CN(C)CCNC(=O)N1c2ccccc2C(=O)c3ccccc             | 1 |   |
| CCCCOO                                          | 1 |   |
| COc1cccc2sc(N)nc12                              | 1 | 1 |
| COCC1CN(C)C2Cc3cn(C)c4cccc(C2=C1)c3             | 1 |   |
| CC(N)(C(=O)O)c1ccc(cc1):                        | 0 |   |
| O=C\C=C\C1c                                     | 0 | 0 |
| CC(=O)NC(CS)C(=O)O                              | 1 |   |
| COc1ccc(cc1N=Nc2c(O)c(cc3ccccc23)C(-            | 1 |   |
| CN1CCOC(c2ccccc2)c3ccccc3C1                     |   | 0 |
| CCN(CC)CCOC(=O)C1(CCCC                          | 0 |   |
| Brc1ccc(cc1)c2ccccc2                            | 0 | 0 |
| C[C@@]12C                                       | 0 | 0 |
| OC(=O)c1cc2OCOc2c3c4ccccc4cc(c13)[N             | 1 |   |
| C1CCN(CCCl)P1(=O)OCC(=O)CO1                     | 1 |   |
| COC(=O)c1c(O)c2ccccc2c3OC(C)(C)C=Cc             | 1 |   |
| CCCCCCCCCCCC=C                                  | 0 | 0 |
| Cc1ccc(cn1)c                                    | 0 | 0 |



|                                                |   |   |   |   |
|------------------------------------------------|---|---|---|---|
| Brc1nc2ccccc2s1                                |   |   | 0 |   |
| CCCCCCC1CO1                                    |   | 0 |   |   |
| c1ccc2c(c1)sc3ccccc23                          | 0 |   |   | 0 |
| CCCCCOC[C@H]1CO1                               |   | 1 |   |   |
| Cc1occc1S                                      |   |   |   | 0 |
| C=C1CC(=O)O1                                   |   | 0 |   |   |
| O=Cc1cccc(c1)N(=O)=O                           |   | 1 |   | 0 |
| C1COCO1                                        |   | 0 |   |   |
| CCOC(=O)C(C                                    | 0 | 0 |   |   |
| C[C@@H]1[C@H]2CC[C@H]1                         | 0 |   |   |   |
| CCOC(=O)C(CS)NCCNC(CS)C(=O)OCC                 |   |   |   | 0 |
| CN1[C@@H]2CC[C@H]1C(C                          | 0 |   |   |   |
| O=C(CC(=O)c1ccccc1)c2ccccc2                    |   |   |   | 1 |
| CCN(CCC)CCCNc1c2ccccc2nc3c(OC)cccc             |   | 1 |   |   |
| Oc1c(N=Nc2ccc(cc2)S(=O)(=O)O)c3ccc(            |   | 1 |   |   |
| CCCCCN(CCCOC)C(=O)C(CCC(=O)O)NC(=              |   | 0 |   |   |
| CCOc1ccc2C[                                    | 0 | 0 |   | 0 |
| COc1ccc(cc1)C2OC2C(=O)c3ccccc3                 |   | 1 |   |   |
| CC1=CC(=O)Oc2cc(O[C@@                          | 0 |   |   |   |
| CCOC(=O)OC                                     | 0 | 0 |   |   |
| [O-][N+](=O)c1cc2C(=O)c3cc(cc(c3c2c(c          |   | 1 |   |   |
| O=N(=O)c1ccc2C3OC3c4cccc5ccc1c2c45             |   | 1 |   |   |
| CCOP(=O)(NC(C)CC)Oc1cc(C)ccc1[N+](=            |   | 0 |   |   |
| NC[C@H](O)                                     | 0 | 0 |   | 0 |
| CCCC(=O)O[C                                    | 1 | 0 |   |   |
| Clc1ccccc1C2CS\C(=C(/C#N)\n3ccnc3)\S2          |   |   |   | 0 |
| CC(C)N1C(=O)c2ccccc2NS1(=O)=O                  |   | 0 |   |   |
| OC(CC(C1C(=                                    | 0 | 0 |   |   |
| Cc1cc(ccc1N=Nc2ccc(N)cc2)N(CCO)CCO             |   | 0 |   |   |
| CCN(CC)C(=C                                    | 1 |   |   |   |
| COc1ccc2nc3cc(Cl)ccc3c(NCCCNCCCl)c2c           |   | 1 |   |   |
| CN(C)C=O                                       |   | 0 |   | 0 |
| C\C=C\C=C\C=C=O                                |   |   |   | 0 |
| CN1C(=C(O)c                                    | 0 |   |   | 1 |
| C[C@](N)(Cc                                    | 0 | 0 |   | 0 |
| CN1C2=CC=CC(=[NH2+])C2=Cc3ccccc13              |   | 1 |   |   |
| CC(C)C(O)(C(C)O)C(=O)OCC1CCN2CCCC1             |   | 0 |   |   |
| N[C@@H](CN1C=CC(=O)C                           | 0 |   |   |   |
| CCOC(=O)OCC\C(=C(/C)\N(Cc1cnc(C)nc1N)C=O)\SC(= |   |   |   | 0 |
| CC(C)Nc1ccc(Nc2ccccc2)cc                       | 0 | 0 |   |   |
| CCOC(=O)c1c                                    | 0 | 0 |   | 1 |
| CC1OC1C2CCC3(C)OC3C2                           |   |   |   | 0 |
| Cc1c(nn(c2ccc(O)cc2)c1c3                       |   | 1 |   |   |

|                                                 |   |   |   |   |   |
|-------------------------------------------------|---|---|---|---|---|
| CCCC1CCC(=O)O1                                  |   |   |   | 0 |   |
| CCOC(=O)N1CCN(CC1)[N+]                          | 0 |   |   |   |   |
| COc1ccc(C=CC)cc1                                |   |   |   | 0 |   |
| Cc1ccc2cc3c4C=C[C@@H](O)[C@H](O)c               |   |   | 1 |   |   |
| CCC(C)(C)C(=O)OC1=C(C(=O)OC12CCCCC2)c3cc(Cl)cc( |   |   |   | 1 |   |
| C[C@]12CC[C@H]3[C@@H](CCC4=CC(=O)CC[C@H]34      |   |   |   | 0 | 1 |
| CN(C)[C@H]1[C@@H]2[C@@H](O)[C@@H]3C(=C)c4       |   |   |   | 0 |   |
| C[N@+]1([O-                                     | 0 | 0 |   |   |   |
| NC(=O)c1ccc                                     | 0 | 0 | 0 | 0 |   |
| OC(=O)CC[N-                                     | 0 | 0 | 1 |   |   |
| CC(C)(C)NC[C                                    | 0 | 0 |   | 0 |   |
| C(C1CO1)c2ccc(cc2)c3ccccc3                      |   |   | 1 |   |   |
| CC(C)(C)S                                       |   |   |   | 0 |   |
| CN(Cc1ccccc:                                    | 0 | 0 |   | 0 |   |
| CC1=CC(=O)CCC1                                  |   |   |   | 0 |   |
| OC1C=Cc2c(cc3ccc4cccc5ccc2c3c45)C1C             |   |   | 1 |   |   |
| CCCC(=O)c1cc(O)c(O)cc1O                         |   |   | 1 |   |   |
| Cc1ccc2c(CO)c3ccc4ccccc4c3nc2c1                 |   |   | 0 |   |   |
| CCC(C)OC(C)CC                                   |   |   |   | 0 |   |
| O[C@@H]1CCCN[C@H]1CC(=O)CN2C=Nc3cc(Br)c(Cl)     |   |   |   | 0 |   |
| COc1ccc(Cc2,                                    | 0 | 0 | 1 | 0 |   |
| CC(C)(C)C(=O)C1C(=O)c2ccccc2C1=O                |   |   | 0 | 1 |   |
| N1c2ccccc2S                                     | 1 | 0 | 0 | 1 |   |
| Nc1c(cc(c2C(=O)c3ccccc3C(=O)c12)N(=             |   |   | 1 |   |   |
| COC(C)COC(C)COC(C)CO                            |   |   |   | 0 |   |
| CC(C)c1ccc(Cn2ccc3c2ccc4                        |   | 1 |   |   |   |
| COc1ccc2cc(ccc2c1)[C@H](C)C(=O)O                |   |   |   | 0 |   |
| Cn1c(N)nc2nc3cccnc3cc12                         |   |   | 0 |   |   |
| NCC(=O)O                                        |   | 0 | 0 | 0 |   |
| CC(=O)[C@]1                                     | 0 | 0 |   |   |   |
| COC(=O)c1oc(c(Cl)c1Cl)[N+](=O)[O-]              |   |   | 1 |   |   |
| O=C1CCCc2ccccc12                                |   |   |   | 0 |   |
| CCC(C)(C)C                                      |   |   | 0 |   |   |
| CC(=O)OC\C=C(/C)\C=C\C=C(/C)\C=CC1=C(C)CCCC1(C  |   |   |   | 0 |   |
| OC1C(O)C(OC1COP(=O)(O)O)n2cnc3c(O               |   |   | 0 |   |   |
| Cc1cccc2ccccc12)[N+](=O)[O-]                    |   |   | 1 |   |   |
| CC(CCCC(C)(C                                    | 0 | 0 |   | 0 |   |
| c1cc2ccc3ccccc4ccc(c1)c2c34                     |   |   | 1 | 1 |   |
| CC1=NN(C(=O)C1)c2ccc(cc2)S(=O)(=O)O             |   |   |   | 0 |   |
| CCC(C1OC(CC)(CC1C)C2CC[                         |   | 0 |   |   |   |
| [O-][N+](=O)c1ccc2c(c1)c3ccccc4cccc2c3          |   |   | 1 |   |   |
| O=Nc1c(nc2scn12)c3ccc(cc3)N(=O)=O               |   |   | 1 |   |   |
| OC(=O)c1cc(cc2cccnc12)[N+](=O)[O-]              |   |   | 1 |   |   |

|                                              |   |   |   |   |
|----------------------------------------------|---|---|---|---|
| CCOP(=O)(OCC)OCC                             |   |   | 0 | 0 |
| CC(C)C(=O)O                                  | 0 | 0 |   |   |
| [O-]S(=O)(=O)C(F)(F)C(F)(F)C(F)(F)C(F)(F)F   |   |   |   | 0 |
| COC1\C=C\OC2(C)Oc3c(C)                       |   | 0 |   |   |
| OC1COC(OCC2OC(Oc3ccc4C(=O)c5ccccc            |   |   | 0 |   |
| CCc1ccc2Sc3                                  | 1 | 1 |   |   |
| OC(=O)c1ccc(cc1[N+](=O)[O-])[N+](=O)         |   |   | 1 |   |
| CC(C)[C@H](NC(=O)[C@H](CC(=O)O)NC(=O)[C@H](C |   |   |   | 0 |
| CC1(CO1)c2ccc(Cl)cc2                         |   |   | 1 |   |
| Oc1ccc(cc1CC=C)S(=O)(=O)c2ccc(O)c(CC=C)c2    |   |   |   | 1 |
| BrC(Br)N(=O)=O                               |   |   |   | 1 |
| CCOP(=S)(OCC)S[C@@H]1OCCO[C@H]1              |   |   | 1 |   |
| CN1SC(=CC1-                                  | 0 | 0 | 1 | 0 |
| CCCC[C@@H](CC)COCCCN                         |   |   | 0 |   |
| CCCCC(CC)COCCCN                              |   |   | 0 |   |
| CC(=O)N(O)c1ccc2c(Cc3ccccc23)c1              |   |   | 1 |   |
| CC(=O)CC(=O)Nc1ccc2NC(=O)Nc2c1               |   |   |   | 0 |
| CC(=O)O[C@                                   | 0 | 1 |   | 1 |
| C[C@@H]1CC[C@H]2C(C)(C)[C@H]3C[C@@]12CC[C@   |   |   |   | 1 |
| OP(=O)(Oc1ccccc1)Oc2ccccc2                   |   |   |   | 0 |
| CCCCOP(=O)(OCCCC)OCCCC                       |   |   | 0 | 0 |
| CCCCCCCCN(C)C                                |   |   |   | 0 |
| NCCCN(CCO)CCO                                |   |   |   | 0 |
| CC(C)(C)c1cc                                 | 0 | 0 |   | 0 |
| Cc1ccc(Cl)cc1Cl                              |   |   |   | 0 |
| CC12CCC3C(CCC4=C3CCC(=O)C4)C1CCC2            |   |   | 0 |   |
| CC(=O)CCc1ccc(O)cc1                          |   |   |   | 0 |
| CC(=O)C(C)(C)C                               |   |   |   | 0 |
| CCON(OC(=O)C)C(=O)c1ccccc1                   |   |   | 1 |   |
| CC(C)c1ccccc1O                               |   |   |   | 0 |
| CCN(CC)CCO(                                  | 0 | 0 |   |   |
| [O-]C(=O)CS                                  |   |   |   | 0 |
| CN(C)c1ccc(cc1)C(c2ccccc2)c3ccc(cc3)N        |   |   | 0 | 1 |
| CC(=O)N(O)C                                  | 0 | 0 |   | 0 |
| N[C@H]1COI                                   | 0 | 0 |   |   |
| Fc1ccc(CN(C                                  | 1 | 1 |   |   |
| Nc1ncnc2c1ncn2C3OC(CO)C(O)C3O                |   |   | 0 |   |
| CCOCCC(=O)OCC                                |   |   |   | 0 |
| NC\C=C/C(=C                                  | 0 | 0 |   |   |
| Nc1nc(NO)c2ncn(C3OC(CO)C(O)C3O)c2            |   |   | 1 |   |
| NS(=O)(=O)c                                  | 0 |   |   |   |
| N[C@@H](CCC(=O)NNc1ccc(CO)cc1)C(=            |   |   | 1 |   |
| CNc1ccc(cc1)N=Nc2ccccc2                      |   |   | 1 |   |

|                                              |   |   |   |
|----------------------------------------------|---|---|---|
| CC1(C)C(CC[C                                 | 0 | 0 |   |
| Cn1c2ccccc2c3cc(ccc13)N(=O)=O                |   |   | 1 |
| O=Nn1cc(CC#N)c2ccccc12                       |   |   | 1 |
| CCCCOC(=O)C(=O)Nc1cccc(c1)c2nnn[nH]2         |   |   | 0 |
| CC(=O)Nc1ccccc1O                             |   |   | 0 |
| CC(=O)NN=Cc1c[n+][[O-]]c2ccccc2[n+]1         |   |   | 1 |
| NC(CCC(=O)C                                  | 0 | 0 |   |
| CCN(CC)CCNC(=O)c1c(C)[n                      |   | 1 |   |
| CC(=O)C1CCOC1=O                              |   |   | 0 |
| Nc1ccc(cc1)N(=O)=O                           |   |   | 1 |
| Nc1ccc(cc1)C                                 | 0 | 0 | 0 |
| C[C@H]1CCCN(C1)N=O                           |   |   | 1 |
| NC(=O)N(CCO)N=O                              |   |   | 1 |
| CC(C)(C#N)C(C)(C)C#N                         |   |   | 0 |
| CCCCOC(=O)C=Cc1oc(cc1)N(=O)=O                |   |   | 1 |
| Cc1c(nn(c2ccc(Cl)cc2Cl)c1c                   |   | 1 |   |
| OC(=O)\C(=C(/Cl)\C=O)\Cl                     |   |   | 1 |
| COc1cc(C=O)cc2N3C[C@H]4[C@H](N4C(=O)C)[C@@   |   |   | 0 |
| CC(C)c1cc(ccc1N)c2ccccc2                     |   |   | 1 |
| CC(=O)Nc1cc                                  | 0 |   |   |
| CCCC[C@@H](CC)COC(=O)c1ccccc1C(=C            | 0 |   |   |
| c1ccc2sncc2c1                                |   |   | 0 |
| COC(=O)C1=CCCN(C1)N=O                        |   |   | 1 |
| NC(=O)C1(OC1C(=O)c2ccccc2)C(=O)N             |   |   | 1 |
| CC(=O)N=C1C=CC(=O)C=C1                       |   |   | 0 |
| O=N(=O)c1ccc2c3cccc4ccc(c5cccc1c2            |   |   | 1 |
| CNc1ccc(NCCO)c2C(=O)c3ccccc3C(=O)c:          |   |   | 1 |
| NC(=N)S\C=C/C(=O)O                           |   | 0 |   |
| CCCCCCCCCCCCCCCC                             |   |   | 0 |
| C[C@@H]1C[C@H]2[C@@H]3C[C@H](F)C4=CC(=O)C    |   |   | 0 |
| O=C(CS(=O)Cc1occc1)NC\C=C/COc2cc(CN3CCCC3)cc |   |   | 0 |
| CCC12CCCN3CCC4(C(CC1)N                       |   | 0 |   |
| Nc1cc(ccc1c2ccc(cc2)N(=O)=O)N(=O)=C          |   |   | 1 |
| CCOC(=O)C(C                                  | 0 | 0 |   |
| O=Cc1ccc2ccc3cccc4ccc1c2c34                  |   |   | 1 |
| CN1C(=C(O)c                                  | 0 |   | 1 |
| COc1cc(ccc1O)C2Oc3cc(O)cc(O)c3C(=O)          | 0 |   |   |
| COC(=O)\C(=C\c1oc(cc1)[N+](=O)[O-])\         |   |   | 1 |
| [O-][N+](=O)c1ccc(NC(=O)c2csc(c2)[N+         |   |   | 1 |
| CCOP(=S)(OCC(C)C)SCCl                        |   |   | 0 |
| NC(CCC(=O)NC(CSC(=O)NCCO)C(=O)NC             |   |   | 0 |
| CNS(=O)(=O)c1ccc(N)cc1                       |   |   | 0 |
| Nc1cc(N)cc(c1)C(=O)O                         |   |   | 0 |

|                                               |   |   |
|-----------------------------------------------|---|---|
| OC[C@@H](O)[C@@H](O)[C@H](O)[C@@H](O)[C@      | 0 | 0 |
| Oc1nsc2cc(ccc12)[N+](=O)[O-]                  | 1 |   |
| CCOC(=O)C(=NNc1ccc(cc1OC)c2ccc(NN:            | 0 |   |
| CC(C)CN(C[C                                   | 0 |   |
| Nc1ccc(cc1)N(c2ccc3ccccc3c2)c4ccc5cc          | 0 |   |
| C\C(=C(/C#N                                   | 0 | 0 |
| Oc1ccc(cc1O)C2CNCc3sccc                       | 0 |   |
| Oc1ccc2ccccc2c1[N+](=O)[O-]                   | 1 |   |
| COC1=CC(=O)c2c([nH]cc3c4ccccc4nc23)           | 1 |   |
| OCCN1CC2CC(C1)C3=CC=C                         | 0 |   |
| CCCC(=O)OCC                                   | 0 | 0 |
| COc1nc(N)nc2[nH]cnc12                         |   | 0 |
| C1OC1C2CO2                                    | 1 |   |
| CC(CN)CCCN                                    |   | 0 |
| CC(C)CNCC(C)C                                 | 0 | 0 |
| CCN(CC)C(=O)N[C@H]1CN(C)[C@H]2Cc3c[nH]c4cccc( | 1 |   |
| [O-][N+](=O)c1ccc2ccc3c(ccc4ccc1c2c3'         | 1 |   |
| Cc1ccccc1C#N                                  | 0 |   |
| OC(=O)c1ccccc1C(=O)[O-]                       |   | 0 |
| CC(C)C1=CC2                                   | 0 | 0 |
| CCOC(=O)c1cc(nc2ccc(C)cc                      | 0 |   |
| OC[C@H](O)                                    | 0 | 0 |
| CC(C)N(C(C)C)c1ccccc1                         |   | 0 |
| CC[N+](CC)(CC)CCCNC1=CC(=C                    | 0 |   |
| C1Cc2c(cc3ccc4cccc5ccc2c3c45)C6OC16           | 1 |   |
| CCCCCCCC(=O)O[C@@H]1                          | 0 |   |
| C[C@H](CS)C                                   | 0 | 0 |
| CCCN(CCCC(=O)O)N=O                            | 1 |   |
| Nc1ccc2ncsc2c1                                | 1 |   |
| Clc1ccc(CC#N)cc1                              | 0 |   |
| CCCCOC(=O)C(=O)OCCCC                          |   | 0 |
| OC(=O)C(Cl)C                                  | 0 | 0 |
| NCC(O)CC(=O)O                                 |   | 0 |
| CC(C)CCCC(C)CCO                               |   | 0 |
| CC1CCN(CC1)N=O                                | 1 |   |
| [O-][N+](=O)c1ccc2c(Cc3ccccc23)c1             | 1 |   |
| Oc1c2C(=N)CCC(=N)c2c(O)c3ccccc13              | 1 |   |
| CCOP(=O)(Cl)Cl                                |   | 0 |
| CC(=O)OC1(CCC2C3CCC4=C(CCC(=O)C4)(            | 0 |   |
| CCC1(CC)C(=C                                  | 0 | 0 |
| Cc1ncc(N(=O)=O)n1C                            | 1 | 0 |
| Sc1nc2ccccc2s1                                | 0 | 1 |
| O=C1CC(=O)C1=O                                | 0 |   |

|                                              |   |   |   |
|----------------------------------------------|---|---|---|
| CCCCC(=O)C=C                                 |   |   | 0 |
| O[C@H]1C[C@@](O)(C[C                         | 0 |   |   |
| O=C(OC\C=C\C1CCCC1)\C=C\C2CCCC2              |   | 1 |   |
| CCCCCCCCCSn1cc[n+](C)c1                      |   | 1 |   |
| C\C=C\1/CC(C)C(C)(O)C(=O)OCC2=CC[N           |   | 1 |   |
| CCCCCCC(=O)Oc1c(Br)cc(cc1Br)C#N              |   |   | 1 |
| COc1cc(cc(O                                  | 0 | 0 |   |
| NNC(=O)CNc1ccc2cccc2c1                       |   | 0 |   |
| CC(O)C(O)[C@H]1CNc2nc(                       | 0 |   |   |
| Cc1cc(c(C)c2c3cccc3n(C)c12)[N+](=O)[         |   | 1 |   |
| CCOc1ccc(NC                                  | 0 | 0 | 1 |
| C[C@H]1CC[                                   | 0 | 0 |   |
| Nc1nc(Occ2c                                  | 0 | 0 |   |
| CCN1N=NN(CCN2CCC(COC)(CC2)N(C(=O)CC)c3cccc3  |   |   | 0 |
| CC1=CC2=C(C(=O)C(=O)C(C)(O)C(O)C2=C          |   | 1 |   |
| O=N(=O)c1ccc2CCNc2c1                         |   | 1 |   |
| CCOC(=O)N(CCC=O)N=O                          |   | 1 |   |
| O=C1c2cccc2Cc3cccc13                         |   | 1 | 1 |
| CCCO                                         |   | 0 | 0 |
| COc1cccc1N2CCN(CCCCN                         | 0 |   |   |
| Nc1ccc(NCCO)c(c1)[N+](=O)[O-]                |   | 1 |   |
| ClCCN[P@]1(                                  | 0 | 0 | 1 |
| Clc1ccc2cccc2n1                              |   | 0 |   |
| OC(=O)c1ccc(Nc2c3cccc3nc4cc(ccc24)†          |   | 1 |   |
| BrCC(=O)c1ccc(Br)cc1                         |   | 0 |   |
| Cn1c(COC(=O)N)ncc1N(=O)=O                    |   |   | 0 |
| CC(=O)OCC1=C(N2[C@H](SC1)[C@H](N)C2=O)C(=O)C |   |   | 0 |
| CC(C)(O)C(=O)c1ccc(OCCO)cc1                  |   |   | 0 |
| CC\C=C\1/OC(=O)c2cccc12                      |   | 1 |   |
| OC(=O)\C(=C(/C=O)\C(Cl)Cl)\Cl                |   | 1 |   |
| CC(=O)OCC(=O)[C@@]1(O)CC[C@H]2[C@@H]3CCC4    |   |   | 0 |
| CCOc1ccc(NC                                  | 0 | 0 | 1 |
| Cc1cc(NC(=O                                  | 0 | 0 |   |
| Clc1nccc2ccncc12                             |   | 0 |   |
| CCN1CCCC1=                                   | 0 | 0 | 0 |
| NC(=O)N(c1cccc1)c2ccc(cc2)C(=O)O             |   | 1 |   |
| COc1ccc2nc([nH]c2n1)S(=O)Cc3ncc(C)c(OC)c3C   |   |   | 0 |
| Cc1c(c(C)c(c(c1[N+](=O)[O-])C(C)(C)C)[I      |   | 0 |   |
| CCCCOCCN(C(=O)C)Clc1c(CC)cccc1CC             |   | 1 |   |
| CNC(C)(C)Cc1                                 | 0 | 0 | 0 |
| OS(=O)(=O)c1ccc(Cl)cc1                       |   |   | 0 |
| CC(C)[C@@]1(NC(=O)[C@                        |   | 1 |   |
| Oc1cc(O)c(Cl)cc1Cl                           |   |   | 1 |

|                                                |   |   |   |   |
|------------------------------------------------|---|---|---|---|
| CC[C@@H](C)[C@H](N)C(=O)O                      |   |   | 0 |   |
| Oc1cc(O)cc(C                                   | 0 | 0 | 0 | 0 |
| OC(=O)c1cc2ccccc2cc1O                          |   |   | 0 |   |
| ClC[C@@H]1O[C@H](CCl)O[C@H](CCl)(              |   |   | 1 |   |
| NC(CCCCNCC(N)C(=O)O)C(=O)O                     |   |   | 0 |   |
| CCc1cccc(O)c1                                  |   |   |   | 0 |
| Clc1ccc(cc1)C(=O)N[C@H]                        | 0 |   |   |   |
| CC(=O)Nc1cnc2ccccc2c1                          |   |   | 0 |   |
| CC1(C)NC(=O)N(C1=O)c2ccc(c(c2)C(F)(F)F)N(=O)=O |   |   | 0 | 1 |
| OC1C=Cc2cc3c(cc2C1O)c4cccc5cccc3c45            |   |   | 1 |   |
| OCCN1C(=O)N(CCO)C(=O)N(CCO)C1=O                |   |   | 0 | 0 |
| OC1=NCCN1c2ncc(s2)N(=O)=O                      |   |   | 1 |   |
| CCCc1ccc(cc1                                   | 0 | 0 |   | 0 |
| CC(=O)N1CCCC1C(=O)N(CC(=O)O)N=O                |   |   | 1 |   |
| Oc1ccccc1c2ccccc2O                             |   |   | 0 |   |
| NC(CCC(=O)N)C(CSC(=O)NCCCl)C(=O)NC             |   |   | 1 |   |
| ClC1CCN(CC1)N=O                                |   |   | 1 |   |
| C[C@]12CCCC(=C)[C@@H]                          | 0 |   |   |   |
| CCNC(=O)\C=                                    | 0 | 0 |   | 0 |
| CC(C)(C)c1ccc(CCOc2ncnc3ccccc23)cc1            |   |   |   | 0 |
| COCC(=O)O                                      |   |   | 0 | 0 |
| COc1cc2OC3OCCC3c2c4Oc5cccc(O)c5C(              |   |   | 0 |   |
| CN1C(CCC1=O)c2ccc[n+](([O-])c2                 |   |   | 0 |   |
| COc1ccc2cc3N(C)CCc4cc(OC)c(OC)c(c2c            |   |   | 0 |   |
| C[C@@H](O)C(=O)O                               |   |   | 0 | 0 |
| CC1(C)SC2C(NC(=O)Cc3ccccc3)C(=O)N2(            |   |   | 0 |   |
| Clc1cc(Cl)c(Cl)c(c1Cl)N(=O)=O                  |   |   |   | 0 |
| Nc1cc2c(cc1N(=O)=O)[nH]c3ccccc23               |   |   | 1 |   |
| ClCC(Cl)C=C                                    |   |   | 0 | 0 |
| NCC(O)c1ccc                                    | 0 | 0 |   | 0 |
| CC(C)CCCC(C)C1CCC2C3CC=C4CC(CCC4(C             |   |   | 0 |   |
| Cn1cnc(CCN)                                    | 0 | 0 |   |   |
| FC(F)(F)c1ccccc1Cl                             |   |   | 0 | 0 |
| COc1c(Cl)cc2c(N(C)C3N4C(=O)C5(C)SSC            |   |   | 0 |   |
| Cc1c2[C@H]3N[C@H]3c4ccccc4c2cc5cc              |   |   | 1 |   |
| CC(CCC(=O)O)C1CCC2C3C(CCC12C)C4(C)             |   |   | 0 |   |
| Cc1c(C)c(N)c(cc1N)N(=O)=O                      |   |   | 1 |   |
| O1[C@@H]2[C@H]1c3cc4c(ccc5ccccc45              |   |   | 1 |   |
| Oc1oc2ccccc2n1                                 |   |   | 0 |   |
| FCC1CO1                                        |   |   | 1 |   |
| COC(=O)\C(=C(/OP(=O)(OC)OC)\c1ccc(             |   |   | 0 |   |
| Oc1cc2CCNC                                     | 1 | 0 |   |   |
| CCCCC(=O)O[C@@]1(CC[C@H]2[C@@H]3CCCC4=CC(=     |   |   |   | 0 |

|                                             |   |   |   |
|---------------------------------------------|---|---|---|
| CC(C)c1ccc2cc(ccc2c1)C(C)C                  |   |   | 0 |
| CC(C)C[C@@                                  | 0 | 0 | 1 |
| CN(C)c1ccc(\C=C\C2=CC(=C(C#N)C#N)C          |   | 1 |   |
| CCCCCOC(=O)CCCC(=O)OCCCCC                   |   |   | 0 |
| CC1(C)N(Br)C(=O)N(Br)C1=O                   |   |   | 0 |
| lc1cccc(c1)N(=O)=O                          |   |   | 0 |
| CC(C)Nc1snc2ccccc12                         |   | 0 |   |
| Clc1c2ccccc2cc3ccccc13                      |   | 1 |   |
| OC(=O)CSCC(=O)NC1CCSC1=O                    |   |   | 0 |
| CCCCCOC1c                                   | 0 | 0 | 1 |
| Cc1c(CC(C)(C)C(=O)O)n(Cc                    |   | 0 |   |
| COc1ccc(cc1)C2OCC3(COC                      |   | 0 |   |
| O=N(=O)c1ccc2ccc3c4C=CCCc4cc5ccc1c          |   | 1 |   |
| CCCC\C=C/C                                  | 0 | 0 | 0 |
| CCCCC(CCCCCCCCC(=O)OCC(COC(=O)C)OC(=O)C)    |   |   | 0 |
| CCCCCCCCC                                   | 1 | 1 |   |
| CCC(C)C(=O)(                                | 0 | 0 |   |
| OCC1OC(Oc2cc3C=CC(=O)(                      |   | 0 |   |
| CC1c2cc(C)ccc2c3ccc(C)cc13                  |   | 0 |   |
| Clc1cccc(Cl)c                               | 1 | 0 | 0 |
| CS(=O)(=O)C=C                               |   | 0 |   |
| Cc1cc(ccc1O)C(C)(C)c2ccc(O)c(C)c2           |   |   | 1 |
| OC[C@H]1O[C@H]([C@H]                        |   | 0 |   |
| Cc1c2ccccc2cc3c4[C@H](O)[C@H](O)C=          |   | 1 |   |
| CN(CCCl)Cc1                                 | 0 | 0 |   |
| OC(=O)c1ccc                                 | 0 | 0 |   |
| Cc1cc2nc(N)sc2cc1C                          |   | 1 |   |
| Oc1cccc2ncccc12                             |   | 1 |   |
| CCOC(=O)c1                                  | 0 | 0 |   |
| COc1cc(\C=C(/C#N)\C(=O)                     |   | 0 |   |
| ClCC1(C(Cl)Cl)C2CC(Cl)(Cl)C1(CCl)C(Cl)C2    |   | 1 |   |
| Cc1oc2c(ccc3ccc4ccc(O)cc4c23)n1             |   | 1 |   |
| Clc1ccc(cc1N(=O)=O)N(=O)=O                  |   | 1 |   |
| OC(=O)c1cccc(Cl)n1                          |   |   | 0 |
| CN(C)c1ccc(cc1)C(=O)c2ccc(cc2)N(C)C         |   | 1 | 1 |
| CNc1ccc2oc(                                 |   | 1 |   |
| Oc1ccc2CC3N(CC4CC4)CCC                      |   | 0 |   |
| CCCC[C@H]1CN(CC2CCOCC2)C(=O)OC13CCN(CC3)C4( |   |   | 0 |
| CCC(=O)c1cc                                 | 0 | 0 | 0 |
| Cc1ccccc1CNc2ncnc3c2ncn3[C@@H]4O[C@H](CO)[C |   |   | 0 |
| C[C@@H]1c2ccccc2c3ccc(C)cc13                |   | 1 |   |
| CC(=O)c1occc1                               |   | 1 |   |
| COc1cc2OC[C@@H]3Oc4c5C[C@H](Oc              |   | 0 |   |



|                                                 |   |   |   |   |
|-------------------------------------------------|---|---|---|---|
| CCOP(=S)(OCC)SCSP(=S)(OCC)OCC                   | 0 |   |   |   |
| [O-][N+](=O)c1ccccc1Cl                          | 1 |   |   |   |
| CN(C)CCNC(=O)c1cccc2C(=O)c3cccc3O               | 1 |   |   |   |
| CCCCCCC[N+]                                     | 1 | 0 |   | 0 |
| [NH3+]O                                         |   |   |   | 0 |
| CC(=O)[C@H]1[C@@H](C[C@H]2[C@@H]3CC=C4C[C@@H]1C | 0 | 0 |   | 0 |
| C\C=C(/C)\CCl                                   |   |   | 1 |   |
| Nc1ccc(Cl)cc1Cl                                 | 1 |   |   | 0 |
| OC1C2OC2c3c(ccc4cc5ccc6ccccc6c5nc34             | 1 |   |   |   |
| CC1(C)C[C@@H]1C(=O)N\C(=C/CCCCSC[C@H](N)C(=O)   |   |   |   | 0 |
| CCN[C@@H](C)Cc1cccc(c1)C(F)(F)F                 |   |   |   | 0 |
| C[C@@H]1CC(=O)C=C2CC[C@H](C[C@@]12C)C(=C)C      |   |   |   | 0 |
| Oc1cc(Cl)c(Cl)c(Cl)c1                           | 0 |   |   | 1 |
| CC(C)(CO)CO                                     |   |   | 0 | 0 |
| C[N+](C)(C)C                                    | 0 | 0 |   | 0 |
| NC(CSC(F)(F)C(F)F)C(=O)O                        |   |   | 0 |   |
| Oc1ccc(Cl)c2                                    | 0 | 0 |   | 1 |
| COc1cccc2C(=O)c1                                | 0 | 0 |   | 1 |
| OC(=O)Cc1sc(nc1c2ccc(Cl)cc2)c3cccc3             |   |   |   | 1 |
| CCOc1cc(N)c(Cl)cc1C(=O)N                        |   | 0 |   |   |
| Cn1c(nc2cccc12)N(=O)=O                          |   |   | 1 |   |
| Br[C@H]1CCN(C[C@@H]1Br)N=O                      |   |   | 1 |   |
| C[C@]1(O)CC[C@H]2[C@@H]3CCC4=CC(=O)CC[C@]4      |   |   |   | 0 |
| CCN(CCCl)CCCNc1c2cccc2nc3c1ccc4ccc              |   |   | 1 |   |
| Cn1c(nc2cccc12)[N+](=O)[O-]                     |   |   | 1 |   |
| O=C1CCCCCCCCCCCC1                               |   |   |   | 0 |
| Oc1ccc(CC=C)cc1O                                |   |   | 1 |   |
| CC(=O)Nc1snc2c(Cl)cc(Cl)cc12                    |   |   | 0 |   |
| CC(=O)C=Cc1ccc2OCOc2c1                          |   |   |   | 0 |
| [O-][N+](=O)c1ccc(O[C@H]2CO2)cc1                |   |   | 1 |   |
| CO[C@@H]1[C@@H](CC[C@]2(CO2)[C@H]1[C@@H]2)O     |   |   |   | 0 |
| CC(O)CCO                                        |   |   |   | 0 |
| c1ccc2cc3c(ccc4c5ccccc5ccc34)cc2c1              |   |   | 0 |   |
| O=N(=O)c1ccc2cc3ccccc3cc2c1                     |   |   | 1 |   |
| CC1=CC(=O)Oc2cc3OC4(C)OOC4(C)c3cc1              |   |   | 1 |   |
| C[C@]12C[C@@H]1C(=O)C2                          | 0 | 0 |   | 0 |
| Cc1cc(O)ccc1N                                   |   |   |   | 1 |
| CCCCCCCCOc                                      | 0 | 0 |   |   |
| Cc1cc2ccccc2c3ccc4ccccc4c13                     |   |   | 1 |   |
| Cc1cc2CCC[S+](=O)([O-])c1                       |   |   | 0 |   |
| N[S+](=O)([O-])c1cc(c(NC)O)O                    |   |   | 0 |   |
| OC[C@H]1O[C@H]2[C@@H](OC3=NC(=O)C3)O            |   |   | 0 |   |

|                                             |   |   |   |   |
|---------------------------------------------|---|---|---|---|
| CC12CCC3C(CC=C4CC(O)CCC34C)C1CCC2           | 0 |   |   |   |
| O[C@@H]1COC(Nc2ccc(cc2)C(=O)O)[C@H](O)[C@H] |   |   |   | 0 |
| CC[C@@H]([C@@H](C)O)[N+](=O)[O-]            | 0 |   |   |   |
| NNC(=O)c1cccnc1                             |   |   |   | 0 |
| CC(=O)OC1CC2C3(C)CCCC(C)(C)C3CCC2(          | 0 |   |   |   |
| CCCCCCCCCOC(=O)c1ccccc1C(=O)OCC             | 0 |   |   | 0 |
| OS(=O)(=O)C                                 | 0 |   |   |   |
| CCC(CC)Nc1ccc(C)c(C)c1                      |   |   |   | 0 |
| C[N+]1(CCCC                                 | 0 | 0 |   | 0 |
| OCCN(CCO)CCO                                |   |   |   | 0 |
| COC1=NN(CSP(=S)(OC)OC)C(=O)S1               |   |   |   | 0 |
| c1cnc2c(c1)c                                | 0 | 0 | 0 | 0 |
| CCC(=O)O[C@                                 | 0 | 1 |   |   |
| C\C(=C(\Cl)/C(=O)O)\C(=O)O                  |   |   | 0 |   |
| Cc1ncc(C[n+])2csc(CCOCP(=                   | 0 |   |   | 0 |
| CN(N=O)C(=O)N                               |   |   | 1 | 0 |
| CCCCc1cc2cc                                 | 1 | 1 |   |   |
| CCCCCOc1ccc(O)cc1                           |   |   |   | 1 |
| CC(CC(=O)O)C(=O)O                           |   |   | 0 |   |
| CCC(=O)\N=C\1/SN(C(=O)CC)c2ccc(cc1          | 1 |   |   |   |
| [O-][N+](=O)c1ccc(Nc2ncnc3c2ncn3c4c         | 1 |   |   |   |
| CC[C@H]1OC                                  | 0 | 0 |   |   |
| CCN(CC)CCO(                                 | 1 | 0 |   |   |
| OCC1OC(Oc2cccc3cccnc23                      |   | 0 |   |   |
| CC(C)CC(=O)OCc1ccccc1                       |   |   |   | 0 |
| Clc1ccc(OCC(=O)OCCNC23CC4CC(CC(C4)C2)C3)cc1 |   |   |   | 0 |
| CCCCN(CC(=O)C)N=O                           |   |   | 1 |   |
| CC(=C)C1CCC                                 | 0 | 0 |   |   |
| COC[C@@H](O)Cn1cc(nc1Cl)[N+](=O)[C          | 1 |   |   |   |
| OC(=Nc1cccc(c1)N(=O)=O)c2csc(c2)N(=         | 1 |   |   |   |
| CC1=CN([C@                                  | 0 | 0 |   | 0 |
| OC[C@H]1O[C@H](Oc2ccc(CCCCCc3ccc(O[C@H]4O[  |   |   |   | 0 |
| CC(C)(C)N(=O)=O                             |   |   | 0 |   |
| CC(=O)O[C@H]1C[C@H](CC=C1C)C(=C)C           |   |   | 0 |   |
| C[C@@H]1CNC(=O)N1c2ncc(s2)[N+](=            | 1 |   |   |   |
| Nc1ncnc2c1ncn2CCOCP(=                       |   | 0 |   | 0 |
| COCC1=C(N2[C@H](SC1)[C@H](NC(=O)\C(=N/OC)\c |   |   |   | 0 |
| CCOP(=S)(S)OCC                              |   |   |   | 0 |
| CC(=O)\C=C/C1=C(C)CCCC1(C)C                 |   |   | 0 |   |
| N1C(C1c2ccccc2)c3ccccc3                     |   |   | 1 |   |
| COC(=O)[C@                                  | 0 | 0 |   | 0 |
| CCCSP(=O)(OCC)Oc1ccc(Br)cc1Cl               |   |   |   | 1 |
| CCCCCCCCCCCCCCCC(=O)NCCNC(=O)C              |   |   | 0 |   |

|                                                 |   |   |   |   |   |
|-------------------------------------------------|---|---|---|---|---|
| CNP(=O)(N(C)C)N(C)C                             |   |   | 1 |   |   |
| Clc1nc(Cl)c(Cl)c(Cl)c1Cl                        |   |   |   | 0 |   |
| N[C@@](CC1c2ccccc2Oc3                           | 0 |   |   |   | 0 |
| CCCCCCCCCCCCC                                   |   |   |   |   | 0 |
| CCOC(=O)C(C                                     | 0 | 0 |   |   |   |
| COC(C1Cc2cc3cc(OC4CC(O                          | 0 |   |   |   |   |
| CN(N=O)C(=O)NC(C=O)C(O)C(O)C(O)CC               |   |   | 1 |   |   |
| CCCc1ncc(C[r                                    | 0 | 0 |   |   |   |
| O=CC1CC(=O)C(=O)CO1                             |   |   | 1 |   |   |
| CCN(CC)CCC[C@@H](C)Nc1ccnc2cc(Cl)c              |   |   | 1 |   |   |
| COc1ccc(C=CC(=O)c2ccc(OC)cc2OC)cc1              |   |   |   | 1 |   |
| CN(C)c1ccc(cc1)N=Nc2cccc(C)c2                   |   |   | 1 | 1 |   |
| OC(CCN1CCCCC1)(C2CCCC                           | 0 |   |   |   | 0 |
| OCC1OC(C(O)C1O)N(N=O)c2ccc(cc2)[N-              | 1 |   |   |   |   |
| OS(=O)(=O)F                                     |   |   |   | 0 |   |
| Cc1ccc(cc1C)[C@@](OC(=O)NC2CCCC2                |   |   | 1 |   |   |
| CC1OC(O[C@                                      | 0 |   |   |   |   |
| CC(C)C[C@@H]1NC(=O)[C@H](CCCN)NC(=O)[C@@H       |   |   |   | 1 |   |
| C(Oc1ccccc1)[C@H]2CO2                           |   |   | 1 |   |   |
| CN1CCCC[C@@H]1CCN2c:                            | 0 |   |   |   |   |
| NC(=O)NC1NC(=O)NC1=O                            |   |   |   | 0 |   |
| Clc1ccc2NC(=O)Oc2c1                             |   |   |   | 0 |   |
| CN(C)C(=S)S(                                    | 0 | 0 |   |   |   |
| N\C=C(\C#N)/C(=C(\N)/S                          |   | 0 |   |   |   |
| CC(=O)Oc1ccc2OC3(C)OOC3(C)c2c1                  |   |   | 1 |   |   |
| Cc1ccc2cc3c(ccc4ccccc34)c5CC(=O)c1c2            |   |   | 1 |   |   |
| COc1cc(CCN)cc(OC)c1OC                           |   |   |   | 0 |   |
| CC(=O)OC1CC(CC=C1C)C(=C)C                       |   |   | 0 | 0 |   |
| OC[C@@H]1                                       | 0 | 0 |   |   |   |
| O=CNc1ccccc1                                    |   |   | 0 | 0 |   |
| CCOC1=CC(=O)C(=CC1=O)NC(=O)C                    |   |   | 1 |   |   |
| CC(C)N(C(=O)CCl)c1ccccc1                        |   |   |   | 0 |   |
| CNC(=O)c1c(                                     | 0 | 0 |   | 0 |   |
| OC(=O)COCC(=O)O                                 |   |   |   | 0 |   |
| Cn1cnc2cc(ccc12)[N+](=O)[O-]                    |   |   | 0 |   |   |
| CNCc1ccccc1                                     | 0 | 0 |   | 0 |   |
| CCc1cccc(CC)c1N(COC)C(=O)CO                     |   |   | 0 |   |   |
| CC(C)\N=C/1\C=C2N(c3ccc(Cl)cc3)c4ccccc4N=C2C=C1 |   |   |   | 0 |   |
| CCN(C(=O)C=CC)c1ccccc1C                         |   |   |   | 0 |   |
| CCC(N1CCCC:                                     | 0 | 0 |   | 0 |   |
| CCC(C)CO                                        |   |   |   | 0 |   |
| COC(=O)C                                        |   |   | 0 | 0 |   |
| CC(=O)[C@@H](N=Nc1ccc(cc1Cl)c2ccc(              |   |   | 0 |   |   |

|                                                                      |   |   |
|----------------------------------------------------------------------|---|---|
| CN1CCCC1CCN2c3cccc3                                                  | 1 | 0 |
| C=CC(=O)c1ccc2OCOc2c1                                                | 0 | 0 |
| Oc1ccc2C[C@H]3N(CC4CC4)CC[C@@]56[C@@H](Oc1ccc(NO)c1                  | 1 | 0 |
| CC(C)COC(=O)CCCC(=O)OCC(C)C                                          | 0 | 0 |
| CC1=C(CCN2c1ccc(COC(Cn2ccnc2)c3ccc(Cl)cc3Cl)c(Cl)c1                  | 1 | 0 |
| CC1cc2C=CC(=O)Oc2cc1OC                                               | 0 | 0 |
| CCCC(=O)O[C@@]1([C@@H](C)C[C@H]2[C@@H]3COc1cc2C(C)CCc2c3ccc4cccc4c13 | 1 | 1 |
| COc1cc(C)ccc1C(C)C                                                   | 0 | 0 |
| Cc1ccc(C)c(C)c1                                                      | 0 | 0 |
| CC1C2C(=Nc3ccc(C)cc23)N(C)c4cccc14                                   | 1 | 0 |
| CCN(c1cccc1)c2cc(NC)[n+]                                             | 0 | 0 |
| C1=Cc2ccc3c4cccc4c5ccc1c2c35                                         | 1 | 0 |
| Cc1ccc(OP(=O)(Oc2ccc(C)cc2)Oc3ccc(C)cc3)cc1                          | 1 | 1 |
| CCCCC(CC)COC(=O)\C=C\c:                                              | 0 | 0 |
| [O-][N+](=O)c1cc2ccc3cc(cc4ccc(c1)c2c                                | 1 | 0 |
| O[C@H]1[C@H](O)c2cc3ccc4cccc4c3cc                                    | 1 | 0 |
| CC(=O)Oc1cc(c2ccc3cccc4ccc1c2c34)[N-                                 | 1 | 0 |
| CC(C)(C)OOC(C)(C)C                                                   | 0 | 0 |
| O=S1OCCO1                                                            | 0 | 0 |
| OCNC(=O)NCO                                                          | 1 | 0 |
| CO[C@H]1O                                                            | 0 | 0 |
| COc1cccc1N                                                           | 0 | 0 |
| CC(C)COC(=O)COc1ccc(Cl)cc1Cl                                         | 0 | 0 |
| CN1CC(O)c2cc3OCOc3c4c5cccc5CC1c2                                     | 1 | 0 |
| CC(=O)O[C@H]1CC[C@]2(C)[C@H]3CC[C@@]4(C)[C@                          | 0 | 0 |
| OC1OC(C(O)C(O)C1O)C(=C                                               | 0 | 0 |
| CCCCCCCCCCCCCCCCBr                                                   | 0 | 0 |
| Fc1cccc2ccnc12                                                       | 1 | 0 |
| OC(=O)[C@]                                                           | 0 | 0 |
| CCCCCCCCCCCCC(=O)OC(C                                                | 0 | 0 |
| CC1CC2C(Cc3cn(C4CCCC4)c5cccc2c35)N(                                  | 1 | 0 |
| CCOC(=O)C1C(C=C(C)C)C1(C)C                                           | 0 | 0 |
| N[C@H]([C@                                                           | 0 | 0 |
| CC(C)(C)c1ccc(\C=C\C(=O))                                            | 0 | 0 |
| CCN(CC)CCN1C(=O)C(=Nc2cccc12)Cc3ccc(OC)cc3                           | 0 | 0 |
| CC(=CCCC(=CC(=O)O)C)C                                                | 0 | 0 |
| O=N(=O)c1oc(C=C(C#N)C#N)cc1                                          | 1 | 0 |
| CN(C)C(=O)Nc1cccc1                                                   | 0 | 0 |
| NCCCS(=O)(=O)Nc1ccc(Nc2c3ccc(cc3nc1                                  | 1 | 0 |
| Oc1nc(Cl)c(Cl)cc1Cl                                                  | 1 | 1 |

|                                               |   |   |   |
|-----------------------------------------------|---|---|---|
| FCC(F)(F)F                                    | 0 |   |   |
| ClC1C(Br)C(Br)C(Br)C(Br)C1Br                  | 0 |   |   |
| COc1cc2nc3cc(N)c(OC)cc3nc2cc1N                | 1 |   |   |
| C1CSCCS1                                      | 1 | 0 |   |
| O=N(=O)c1ccccc1                               | 0 | 0 |   |
| COc1cc(C)c(\                                  | 0 | 0 |   |
| [O-][N+](=O)c1ccc2ccc3cc4ccccc4c5ccc:         | 1 |   |   |
| C[C@]12CC[C@H]3[C@@H](CCC4=C3CC               | 0 |   |   |
| CC(=C)C(=O)O[C@@H]1C[C@H]2CC[C@]1(C)C2(C)C    |   |   | 0 |
| CC(Cl)COP(=O)(OCC(C)Cl)OCC(C)Cl               |   |   | 0 |
| Cc1nc(oc1CO                                   | 0 | 0 | 0 |
| Oc1ccc2C(=O)c3ccccc3C(=O                      | 0 | 1 | 1 |
| CN(C)C(=O)C                                   | 0 | 0 | 0 |
| Oc1c2nc3ccccc3c2nnn1\N=C\c4ccc(cc4)           | 0 |   |   |
| Oc1ccccc1C(=O)[O-]                            |   |   | 0 |
| CC(C)CC(C)CC(=O)CC(C)C                        |   |   | 0 |
| COc1ccc2[nH                                   | 0 | 0 | 0 |
| C[C@@]1(CCC[C@@]2(C)                          |   | 0 |   |
| [O-][N+](=O)c1ccc2cn[nH                       |   | 0 |   |
| COC(=O)C1CSC2N1C(=O)C(=C2Cl)Cl                | 1 |   |   |
| NC1=NC(=O)N(C=C1)C2OC(CO)C(O)C2O              | 0 |   |   |
| CCCCCOc1cc(C)c(O)c(C)c1C                      |   |   | 1 |
| CCCCC(=O)C=CC                                 |   |   | 0 |
| C[C@H](O)[C                                   | 0 | 0 | 0 |
| C[C@@H]1Cl                                    | 0 | 0 |   |
| CN1CCN(CCC                                    | 1 | 1 |   |
| ClCc1ccc(CCl)cc1                              | 0 |   |   |
| COC(=O)CC(=O)OC                               | 0 | 0 |   |
| CN(C)CCO                                      | 0 | 0 |   |
| [O-][N+](=O)c1nc2ccccc2[nH]1                  | 1 |   |   |
| CC[C@@H]1Cc2cc(O)ccc2(                        |   | 0 |   |
| COc1ccccc1OCC2CNC(=O)O2                       |   |   | 0 |
| CN=NC(C)(C)OO                                 | 1 |   |   |
| CCCCCCCCCCCCOS(=O)(=O)O                       | 0 | 0 |   |
| C[C@@]12[C@H](O)C=C[C(                        |   | 0 |   |
| CCCOC1=NN(C(=O)[N-]S(=O)(=O)c2ccccc2C(=O)OC)C |   |   | 0 |
| O=NN1CCNCC1                                   | 1 | 0 |   |
| O=C(C=Cc1ccc(cc1)N(=O)=O)c2ccccc2             | 1 |   |   |
| CNc1snc2ccccc12                               | 0 |   |   |
| Oc1ccccc1c2oc3ccccc3n2                        | 0 |   |   |
| CCC1NC(=O)C([C@H](O)[C                        |   | 0 |   |
| Nc1cc2nc3ccc(Cl)cc3nc2cc1N                    | 1 |   |   |
| C\C=C/1\CC(=C)[C@](O)(CO)C(=O)OCC2            | 1 |   |   |

|                                              |   |   |     |
|----------------------------------------------|---|---|-----|
| CCc1ccccc1OC[C@@H](O)                        | 0 |   |     |
| OC(=O)c1nc(Cl)ccc1Cl                         |   |   | 0   |
| O=N(=O)c1ccc2NCCC2c1                         |   | 1 |     |
| Clc1ccc2N(C                                  | 1 | 0 | 0   |
| COc1cc(OC)c                                  | 0 | 0 | 0   |
| CCOC(=O)c1c                                  | 0 | 0 |     |
| CN1C[C@@H]                                   | 1 | 0 |     |
| CNC(=O)Oc1                                   | 0 | 0 | 0 0 |
| CC(O)\C=C\C=O                                |   | 1 |     |
| CN1CCN(CCC(=O)N2c3cccc                       | 1 |   |     |
| NC1CCC(CC2CCC(N)CC2)CC1                      |   |   | 0   |
| O=C(CN1CCN                                   | 0 | 0 | 0   |
| COc1ccc(cc1)[C@H](OC(=O)C)C=C                |   | 1 |     |
| NCCN1CCNCC1                                  |   | 0 | 0   |
| CO\N=C\1/C                                   | 0 | 0 | 0   |
| COC1=CC(=O)c2[nH]c(C)c3c4ccccc4nc3c          | 1 |   |     |
| O=N(=O)c1ccc2cc(c(cc2c1)N(=O)=O)N(=          | 1 |   |     |
| ClC(Cl)(Cl)C1CO1                             | 1 |   |     |
| OC(=O)CN(CC(=O)O)N=O                         | 1 |   |     |
| CC1(C)OC[C@@H](COC(=O)CCc2ccc(OC[C@@H](O)Cl  |   |   | 0   |
| CCNc1cc2OC(=O)C=C(C)c2cc1C                   | 0 |   |     |
| NC(=O)CNCCC(c1ccccc1)c2                      | 0 |   |     |
| CC1=C(N2[C                                   | 0 | 0 |     |
| OOC1CCOP(=O)(N1)N(CCCl)CCCl                  |   |   | 0   |
| CC(C)N(=O)=O                                 |   |   | 0   |
| NC(=O)N(O)[C@H]1C[C@@H](Oc2cccc(Oc3ccc(F)cc3 |   |   | 0   |
| Oc1ccc(cc1)c2nc(c3ccncc3                     | 1 |   |     |
| Cc1ccccc1NC(=O)c2csc(c2)[N+](=O)[O-]         | 1 |   |     |
| COc1cc2nc(nc(N)c2cc1OC)                      | 0 |   | 0   |
| O=C1C=Cc2ccccc2C1=O                          | 1 |   |     |
| CC(C)(S)C(N)C(=O)O                           | 1 |   |     |
| O=C1c2cc(ccc2c3c1cc(cc3N(=O)=O)N(=           | 1 |   |     |
| O=C\C=C/C/c1occc1                            | 0 |   |     |
| CCn1c(N)nc2c3ncc(C)nc3ccc12                  | 1 |   |     |
| O=N(=O)c1ccc2c[nH]nc2c1                      | 1 |   |     |
| CC(=C)c1ccc(C)c2ccc(CO)c2c1                  | 1 |   |     |
| CCc1cc(c(O)c(c1)C(C)(C)C(C)(C)C              | 0 |   |     |
| ClC(=Cc1c(Cl)c(Cl)c(Cl)c(Cl)c1Cl)Cl          | 0 |   |     |
| Cc1ccc(OP(=O)(Oc2cccc(C)c2)Oc3cccc(C         | 0 |   |     |
| OCCCCN(CCO)N=O                               | 1 |   |     |
| N[C@@H](CSCc1ccccc1)C(=O)O                   | 0 |   |     |
| Oc1ccc2[nH]                                  | 1 |   |     |
| O1[C@@H]2C=Cc3c(ccc4c5C=Cc6cccc(c            | 1 |   |     |

|                                                 |   |   |
|-------------------------------------------------|---|---|
| N[C@H](CCCP(=O)(O)O)C(                          | 0 |   |
| C[N+](=CCl)C                                    |   | 0 |
| CC1(C)S[C@                                      | 0 | 0 |
| Nc1nc(O)c2ncn(C3OC(COP(=O)(O)O)C(C              | 0 |   |
| C=CC(=O)N(CC1CO1)CC2CO2                         | 1 |   |
| CCC(=O)CC                                       |   | 0 |
| O=N(=O)c1ccc2c3ccccc3c4cccc1c24                 | 1 |   |
| CC(=O)O[C@@H]1[C@]2(C)C[C@]2(C=C(               | 1 |   |
| CO[C@H]1O[C@@H]2O[C@@]3(C)CC[C@H]4[C@H](        |   | 0 |
| COC(=O)\C=C\C(=O)NC1C(                          | 0 |   |
| Cc1ccccc1N=C(O)c2csc(c2)N(=O)=O                 | 1 |   |
| CCCN(N=O)C(=N)N[N+](=O)[O-]                     | 1 |   |
| CC(=O)O[C@                                      | 0 | 0 |
| CCC(C)(C)c1ccc(O)c(c1)C(C)(C)CC                 |   | 1 |
| OC[C@H]1O[C@@H](Oc2                             | 0 |   |
| OCCN=N#N                                        | 1 |   |
| CCC(C)c1ccccc1O                                 | 0 | 1 |
| CCc1cc(SCc2sc(nc2CN3CCN(CC3)c4ccc(OC)cc4)c5ccc( |   | 1 |
| CSCCC(NC=O)C(=O)NC(Cc1ccccc1)C(=O)              | 0 |   |
| C[C@H]1C[C@H]2[C@@H]3CC[C@](O)(C(=O)COC(=C      |   | 0 |
| OP(=O)(O)OP(=O)(O)O                             | 0 |   |
| COC(=O)c1ccccc1CS(=O)(=O)NC(=O)Nc2nc(OC)cc(OC   |   | 0 |
| NC1=NC(=O)N(C=C1O)C2CC(O)C(CO)O2                | 0 |   |
| CC(CO[N+](=O)[O-])(CO[N+](=O)[O-])C(            | 0 |   |
| Nc1ccc2N=C3N(Cc2c1)C(=O)c4ccccc34               | 1 |   |
| Nc1nc2c(cnn2CCc3ccccc3)                         | 0 |   |
| CC\C=C/CCCCCO                                   |   | 0 |
| O=N(=O)c1ccc2c(cc3ccccc3c2c1)N(=O)=             | 1 |   |
| C=CCN(CC=C)N=O                                  | 1 |   |
| C(Cc1ccccc1)Cc2ccncc2                           |   | 1 |
| CN[C@@H]1[C@H](O)[C@                            | 0 | 0 |
| CC(C)(c1ccccc1)c2ccc(O)cc2                      | 0 | 1 |
| COC(=O)c1c(Cl)c(Cl)c(C(=O)OC)c(Cl)c1Cl          |   | 0 |
| CCc1cccc(CC)c1N=O                               | 1 |   |
| CCCCOC(=O)CCC(=O)C                              |   | 0 |
| Cc1ccc(cc1)C(=O)O                               | 0 | 0 |
| [O-][N+](=O)c1cccc(NS(=O)(=O)c2ccccc3           | 0 |   |
| O=N(=O)c1ccc2ccc3c(ccc4ccc1c2c34)N(             | 1 |   |
| CC(C)[C@@]1(NC(=O)[C@                           | 1 |   |
| CC(C)SC(=N)N                                    | 0 |   |
| COc1cc2c(CC3c4c(CC[N+]3(C)C)cc(OC)c(            | 0 |   |
| O=C1OC(=O)c2cc(Oc3ccc4C(=O)OC(=O)c4c3)ccc12     |   | 0 |
| CC1(C)C(=O)I                                    | 1 |   |

|                                                |   |   |
|------------------------------------------------|---|---|
| CCC(=O)N([C@@H]1CCN(Cc2ccccc2)C[C@@H]1C)c3     |   | 0 |
| CCCCCN1C2C1c3ccccc3c4ccccc24                   | 1 |   |
| NC(=O)c1ccc(cc1)c2nc(c3c                       | 0 |   |
| OS(=O)(=O)O                                    | 0 | 0 |
| CS(=O)(=O)c1ccc(cc1Cl)[C@@H](C[C@H]2CCCC(=O)C2 |   | 0 |
| COc1cc(CNC(=O)CCCCCCC(                         | 0 | 1 |
| COC(=O)c1ccc(cc1)C(=O)O                        |   | 0 |
| CC1=C(O)C(=O)[C@@H]2C                          | 0 |   |
| COc1ccccc1\C=C/C=O                             |   | 1 |
| Nc1ccc2ccccc2c1N=Nc3ccc(cc3)N(=O)=O            |   | 1 |
| CCN1C[C@H]2(COC)[C@H](                         | 0 |   |
| CO\S(=N/[S+](=O)([O-])c1                       | 0 |   |
| OC(=O)CCn1c                                    | 0 | 0 |
| C(c1ccccc1)c2ccccc2                            |   | 0 |
| Oc1ccc2cc3ccc4ccccc5ccc(c2c1)c3c45             | 1 |   |
| CC(C)(C)c1cc(cc(c1O)C(C)(C)C)N(=O)=O           |   | 1 |
| CC1=CN(C2CC(N=[N+]=[N-])C(CO)O2)C(             | 1 |   |
| BrC1ccc(Br)cc1                                 |   | 0 |
| OC(=O)C=Cc1ccc(C=CC(=O)O)cc1                   |   | 0 |
| NC(=O)c1cc[n+](COC[n+])2ccccc2\C=N\C           | 0 |   |
| CC1=C(C=C(C                                    | 0 | 0 |
| Nc1ccc(O)c1[N+](=O)[O-]                        | 0 |   |
| CCCCNc1cc(c                                    | 0 | 0 |
| CC(=O)OCc1ccc2ccc3ccccc4ccc1c2c34              | 1 |   |
| CO[C@H]1[C@@H](C[C@H]2CN3CCc4c                 | 0 |   |
| C[C@@H](O)COC(C)(C)C                           | 1 |   |
| CCCOC(=O)CCCCC(=O)OCCC                         |   | 0 |
| CC(C)CN(N=O)C(=N)N[N+](=O)[O-]                 | 1 |   |
| Oc1cc(O)c2C(=O)C(=O)C(Oc2c1)c3ccccc            | 0 |   |
| Cc1c2ccccc2cc3c4C5OC5C(O)C(O)c4ccc1            | 1 |   |
| C[S+](=O)([O-])CCNc1oc(                        | 0 |   |
| C1c2ccccc2Cc3c1c4ccccc4c5ccccc35               | 1 |   |
| CNCc1oc(CSCCNC(=NCC(O)c2ccc(O)cc2)             | 0 |   |
| OC(=O)CC(Cl)C(=O)O                             | 0 | 1 |
| Nc1nc(NC2CC2)c3ncn([C@H]4C[C@H](CO)C=C4)c3n1   |   | 0 |
| CCCN1C[C@H                                     | 1 | 0 |
| Cc1nnc(SCC2                                    | 0 | 0 |
| CCCCCCCCCCCCCCCCCNC(=O)CCCCCCCC                | 0 |   |
| CC(C)CC(C)(N)C#N                               |   | 0 |
| Cc1ccc2N=C(N)NC(=O)c2c1Sc3ccncc3               |   | 0 |
| OCc1ccc2nc3c(ccc4ccccc34)c(CO)c2c1             | 1 |   |
| CCCCCCCCCCCC=O                                 |   | 0 |
| CCOC(=O)C(C)Br                                 | 1 |   |



|                                                  |   |   |   |   |
|--------------------------------------------------|---|---|---|---|
| Cc1cc(O)ccc1                                     | 0 | 0 | 0 | 1 |
| COC(=O)[C@                                       | 0 | 0 |   | 0 |
| O=C(CCC1CCN(Cc2ccccc2)CC1)c3ccc4CCCCNc4c3        |   |   |   | 0 |
| CC(CN(CCN(CC(C)OCCO)CC(C)OCCO)CC(C)OCCO)OCCC     |   |   |   | 0 |
| CCOC(=O)C1=C(C)NC(=C(C                           |   | 0 |   |   |
| Nc1ccc(\C=C\c2cccc(Cl)c2)cc1                     |   |   | 1 |   |
| Cc1ncc([N+](=O)[O-])n1CC(=O)O                    |   |   | 1 |   |
| Nc1ccc(Cl)c(Cl)c1Cl                              |   |   | 0 |   |
| CCOC(=O)C1=Cc2cc3CCCN4CCc(c2OC1=                 |   |   | 0 |   |
| CC(C)CCC[C@                                      | 0 | 0 |   | 0 |
| O=C(N1CCN(                                       | 0 | 0 |   | 0 |
| C[C@@H]1O                                        | 0 |   |   | 1 |
| Cc1ccc2C(=O)c3ccccc3C(=O)c2c1N                   |   |   | 1 | 1 |
| CC[N+](C)(CC                                     | 0 | 0 |   | 0 |
| CC(C)CC(NC(=O)COc1ccc(Cl)cc1Cl)C(=O)             |   |   | 0 |   |
| CC1CC(O)CC(                                      | 0 | 0 |   | 0 |
| Sc1[nH]cnc2ncnc12                                |   |   | 1 |   |
| CN(C(=O)CO)c1c(l)c(C(=O)NCC(O)CO)c(l)c(C(=O)NCC( |   |   |   | 0 |
| CC1CCCN1CCCNCC(=O)Nc2c(C(=O)c3cc                 |   |   | 1 |   |
| CCc1cccc2ccnc12                                  |   |   | 1 |   |
| COP(=O)(OC)[C@H](O)C(Cl)(Cl)Cl                   |   |   | 1 |   |
| O\N=C\c1cccn1                                    |   |   | 0 |   |
| OC(=O)CC=N(=O)O                                  |   |   | 1 |   |
| CN1CC(c2ccc(O)c(O)c2)c3c                         |   | 0 |   |   |
| CC(C)(C)OC[C@H]1CO1                              |   |   | 1 |   |
| Cn1nc(cc1N)C2CC2                                 |   |   | 1 |   |
| CC(C)n1cnc2c(cc(Cl)cc12)C                        |   | 0 |   |   |
| CC(=O)C1=C(O)[C@@H]2[                            |   | 0 |   |   |
| c1cc[nH]c1                                       |   |   | 0 |   |
| CN(CC1(C)CCCO1)S(=O)(=O)c2ccc(Cl)c(c2)S(=O)(=O)N |   |   |   | 0 |
| Clc1nc(Cl)nc(Cl)n1                               |   |   |   | 0 |
| C=CCOC(=O)CCC1CCCCC1                             |   |   |   | 0 |
| O=N(=O)OCCN(CCON(=O)=O)CCON(=O)=O                |   |   |   | 0 |
| Cc1oncc1C(=                                      | 0 | 0 |   | 1 |
| CCN(N)c1ccccc1                                   |   |   | 1 |   |
| C1CCC2OC2C1                                      |   |   | 1 | 0 |
| CC(=CCO)c1cc                                     | 0 | 0 |   | 1 |
| [O-][N+](=O)c1cc(cs1)C(=O)Nc2ccccc2C             |   |   | 1 |   |
| CC=C\C=N\NC(=O)c1ccncc1                          |   |   |   | 0 |
| CCCC(=O)Nc1                                      | 0 | 0 | 0 |   |
| Nc1nc(N)c2n                                      | 0 | 0 |   |   |
| CCC(CC)C=O                                       |   |   |   | 0 |
| OCCSCSCCO                                        |   |   |   | 0 |

|                                              |   |   |
|----------------------------------------------|---|---|
| O=N(=O)c1ccc2c(ccc3ccccc23)c1                | 1 |   |
| CN[C@]1(CCCCC1=O)c2ccccc2Cl                  |   | 0 |
| Cc1cc(C)c(cc1C)N=Nc2c(O)c(cc3cc(ccc2:CC(C)Cl | 0 | 1 |
| CNC[C@H](C                                   | 0 | 0 |
| CNC=O                                        | 0 |   |
| OC(=O)CC(=C)C(=O)O                           |   | 0 |
| CN1C(=N)Nc2[nH]cnc2C1=O                      |   | 0 |
| C[C@@H](C                                    | 0 | 0 |
| NCc1ccccc1CC(=O)N[C@H]2[C@H]3SCC(=C(N3C2=O)C |   | 0 |
| Cc1c2ccccc2c(CBr)c3ccccc13                   | 1 |   |
| COC(=O)\C=C(/C)\OP(=O)(OC)OC                 |   | 0 |
| Cc1nccc2c3ccc(O)cc3[nH]c                     | 0 | 1 |
| CCCCOC(=O)CCCCCCCC(=O)OCCCC                  | 0 | 0 |
| [O-][N+](=O)c1ccc(cc1)C(=O)C2OC2c3cc         | 1 |   |
| COC(=COC(=O)N)c1c(O)c(N2CC2)c(C)c(C          | 1 |   |
| CCSSCCC                                      |   | 0 |
| C=CC(=O)OCCN1C(=O)N(CCOC(=O)C=C)C(=O)N(CCOC  |   | 0 |
| Cc1ccc(O)c(c1)N(=O)=O                        |   | 0 |
| CC(C)ON([C@H](C(C)C)C(=                      | 0 |   |
| CC(=CC=O)C                                   | 0 | 0 |
| O=N(=O)c1ccc2c3ccccc3cc(c2c1)N(=O)=          | 1 |   |
| CC[N+]1(C)CCCC1                              |   | 0 |
| CC[C@@H]([C@H](C)O)N1N=CN(C1=O)c2ccc(cc2)N3  |   | 0 |
| COc1ccc(Cl)cc1N=Nc2ncc[                      | 0 |   |
| Clc1c(Cl)c(Cl)c(c(Cl)c1Cl)N(=O)=O            | 0 |   |
| [O-][N+](=O)c1ccc2C3OC3c4cccc5ccc1c          | 1 |   |
| OC(=O)\C=C\C(=O)Nc1ccc                       | 0 |   |
| CC1=CC(=O)CC(C)(C)C1                         | 0 | 0 |
| CC1(C)C(O)C                                  | 0 | 0 |
| CCc1nccnc1C                                  |   | 0 |
| OCc1ccc2c3ccccc3c4cccc1c24                   | 0 |   |
| COC1=CC=C2                                   | 0 | 0 |
| CCOc1cc(C=O)ccc1O                            | 0 | 0 |
| CC(=N)NCCCC                                  | 0 | 0 |
| CC1=CC(=O)[                                  | 0 | 0 |
| CC(C)(C)OC(=O)[C@H](N)CN=[N+]=[N-]           | 1 |   |
| Oc1ccc2c(ccc3[nH]c4ccc5ccccc5c4c23)c         | 1 |   |
| O=C1C=CC(=O)c2ccccc12                        | 1 |   |
| ClC1=C(Cl)C(=O)N(N=C1)S(=O)(=O)c2cc          | 0 |   |
| OC(=O)Cc1c[                                  | 0 | 0 |
| CCCCN(CCCC)CCCCCN(CCCC)CCCC                  |   | 0 |
| COC(=O)\C(=C\c1occc1)\C#N                    | 0 |   |

|                                                   |   |   |   |   |
|---------------------------------------------------|---|---|---|---|
| CC(O)C(N)C(=                                      | 0 | 0 |   |   |
| NC(CCC(=O)NC(CSN=O)C(=                            |   | 0 | 1 |   |
| Oc1cccc2OC(=O)C(=Cc12)C3CCc4cccc4(                |   |   | 0 |   |
| CC1(C)[C@H](CC[C@@]2(C)[C@H]1CC[C@]3(C)[C@H]2C)C3 |   |   |   | 0 |
| c1cc(ccn1)c2ccncc2                                |   | 1 |   | 0 |
| CCC1(O)CC(OC2CC(C(O)C(C)O2)N(C)C)C(=O)C1          |   | 1 |   |   |
| CC[C@]1(C)C                                       | 0 | 0 |   |   |
| CC12CCC(C1)                                       | 0 | 0 | 0 | 0 |
| CC(C)n1nc(c2cc3cc(O)ccc3[nH]2)c4c(N)ncnc14        |   |   |   | 0 |
| COc1ccc2c(c1)C(=O)c3c(OC)c(OC)cc4ccr              |   |   | 1 |   |
| C[C@H]1O[C                                        | 0 | 1 |   |   |
| CCC(C)OC(=O)C=Cc1oc(cc1)[N+](=O)[O-               |   |   | 1 |   |
| BrC[C@@H](Br)COP(=O)(OC[C@H](Br)(                 |   |   | 1 |   |
| Nc1ccc(cc1)S                                      | 0 |   |   | 0 |
| CN(C)CCN(Cc1cccc1)c2cccc2                         |   |   | 0 |   |
| COc1cc(OC)c(cc1N[S+](=O                           |   | 1 |   |   |
| OC(=O)C\C(=C\C(=O)O)\C(=O)O                       |   |   | 0 |   |
| O=N(=O)c1ccc2c(Cc3cc(ccc23)N(=O)=O                |   |   | 1 |   |
| CC(CCC1ccc(O)cc1)NCCc2c                           |   | 0 |   |   |
| OCC(O)COc1ccc(Cl)cc1                              |   |   |   | 0 |
| CC(C)C(C)C                                        |   |   | 0 |   |
| COc1cc(ccc1N)c2ccc(N)c(OC)c2                      |   |   | 1 | 1 |
| CCNc1cc2OC3=CC(=NCC)C(=CC3=C(c4cc                 |   |   | 0 |   |
| CN(Cc1cnc2n                                       | 0 | 0 |   | 0 |
| CC(C)CC(=O)\N=C\1/SN(C(=O)CC(C)C)c2               |   |   | 1 |   |
| C[C@H](CSC(=O)c1cccc1)C(=O)N2C[C@H](C[C@H]2(      |   |   |   | 0 |
| N[C@H](C(=O)O)c1cccc(O                            |   | 0 |   |   |
| Cc1onc(c1C(=O)N[C@H]2[C@H]3SC(C)(C)[C@@H](N       |   |   |   | 0 |
| CCCCCc1ccc(cc1)c2ccc(cc2)C#N                      |   |   | 0 | 1 |
| NC(CS)C(=O)                                       | 0 | 0 | 1 | 0 |
| lc1ccc(cc1)N                                      | 1 |   |   |   |
| CP1(C)NP(C)(C)NP(C)(C)N1                          |   |   | 0 |   |
| CCC(Oc1ccc(Cl)cc1)C(=O)C                          |   |   | 0 |   |
| C[n+]1cccc1                                       | 0 | 0 |   |   |
| NNc1nc(cs1)c2ccc(cc2)[N+](=O)[O-]                 |   |   | 1 |   |
| OCC1OC(CC1O)N2C=C(Br)C(=O)NC2=O                   |   |   | 0 |   |
| CCCC[C@@H](CC)COS(=O)(=O)O                        |   |   | 0 |   |
| CCOCCOCC                                          |   |   | 1 | 0 |
| CC(CCC=C(C)C)C=C                                  |   |   |   | 0 |
| OC[C@H]1O                                         | 0 | 0 |   | 0 |
| CSc1cnccn1                                        |   |   |   | 0 |
| CCN1\C(=C\C                                       | 0 | 0 |   |   |
| OC(=O)Cc1ccc(Cl)cc1                               |   |   | 0 |   |

|                                            |   |   |   |
|--------------------------------------------|---|---|---|
| CC(C)(c1ccc(OCC2CO2)cc1                    | 0 | 1 |   |
| O=N(=O)c1ccc(C=Cc2ccccc2)cc1               |   | 1 |   |
| CO\N=C(\C(=                                | 0 | 0 |   |
| Nc1cc(cc(c1O)N(=O)=O)N(=O)=O               |   | 1 | 1 |
| O[S+](=O)([O-])CCC[S+](=                   | 0 |   |   |
| NC(CCC(=NC(CSc1ccc(cc1N(=O)=O)N(=O)=O      |   | 1 |   |
| O=C1C=Cc2ccc3c(ccc4ccccc34)c2C1=O          |   | 1 |   |
| OC(C(=O)OC(                                | 1 | 0 | 0 |
| CCCCCCCCC(                                 | 1 | 0 | 1 |
| O=C(\C=C\c1ccccc1)c2ccccc2                 |   | 0 |   |
| Fc1ccc(\C=C\C(=O)c2ccccc2)cc1              |   | 0 |   |
| C=CC=O                                     |   | 1 | 0 |
| OCc1ccccc1N(=O)=O                          |   | 0 |   |
| CC[C@H](N1CCCC1=O)C(=                      | 0 |   |   |
| ClCCCCC(                                   |   |   | 0 |
| Cc1ccc2C(=O)c3ccccc3C(=O)c2c1              |   |   | 1 |
| CC(O)CN(C)C                                | 0 | 0 | 0 |
| [O-][N+](=O)C([N+](=O)[O-])([N+](=O)[      |   | 1 |   |
| OCCc1ccccc1                                |   | 0 | 0 |
| CC1CC(OC(=O)C)OC(C)O1                      |   | 1 | 0 |
| CO[C@H]1\C                                 | 0 | 0 |   |
| CC1(C)[C@H]2CC[C@]1(C)C(=O)C2              |   | 0 |   |
| CC(C)(C)ON=O                               |   | 1 |   |
| Nc1ccc2c(Cc3cc(ccc23)[N+](=O)[O-])c1       |   | 1 |   |
| CCC(C(=O)NC(=O)NC(=O)C)c1ccccc1            |   |   | 0 |
| CNC(=NCCSc1oc(CN(C)C)cc1)C=[N+](O          |   | 0 |   |
| OC[C@H]1O[C@H]([C@H]                       | 0 |   |   |
| Cc1ncc(C[n+]                               | 0 | 0 | 0 |
| Oc1ccc(cc1)C2(CCCC2)c3ccc(O)cc3            |   | 0 | 1 |
| Oc1c2ccoc2nc3ccccc13                       |   | 0 |   |
| NC(=O)N=NC(=O)N                            |   | 1 |   |
| CC(OC(=O)C)OC(=O)C(C)c1ccc(c(F)c1)c2ccccc2 |   |   | 0 |
| c1cnc2c(c1)ccc3c2ccc4cccn34                |   | 1 |   |
| C[C@]12CC[C@H]3[C@@H](CCC4=CCCC[C@H]34)[C@ |   |   | 1 |
| CN\C(=N\N(=O)=O)\NCC1CCOC1                 |   |   | 0 |
| BrCCOc1ccccc1                              |   |   | 0 |
| OC1C(Oc2ccc3cc4ccc5ccccc6ccc(c3c2)c4c      |   | 0 |   |
| CCN(Cc1ccc(                                | 0 | 0 |   |
| ClCC=C                                     |   | 1 | 0 |
| CC(=O)NCC(=O)N[C@H](C                      | 0 |   |   |
| CN(C)N=Nc1ccc(Cl)cc1                       |   | 1 |   |
| OCc1ccc2ccc3cccc4ccc1c2c34                 |   | 1 |   |
| COCC12OOC1(C)c3ccccc3O2                    |   | 1 |   |

|                                                            |   |   |
|------------------------------------------------------------|---|---|
| <chem>CC(C)CCCCOC(=O)Cc1ccc(Cl)cc1Cl</chem>                | 0 |   |
| <chem>Nc1ccc(Sc2ccccc2)cc1</chem>                          | 1 |   |
| <chem>CCCCCCCCOC(=O)CCCCCCCC(=O)OCCCCCCCC</chem>           |   | 0 |
| <chem>C[N+](C)(C)CC1CO1</chem>                             | 1 | 0 |
| <chem>Nc1cc2nc3ccccc3nc2cc1O</chem>                        | 1 |   |
| <chem>CC(=O)N[C@@H](Cc1c[nH</chem>                         | 0 |   |
| <chem>C1Cc2c(ccc3ncccc23)C4OC14</chem>                     | 0 |   |
| <chem>NC(=O)Nc1cccc2ccnc12</chem>                          | 0 |   |
| <chem>C=CCCC[C@H]1CO1</chem>                               | 1 |   |
| <chem>Oc1ccc2CC3N(CC4CC4)CC[</chem>                        | 1 |   |
| <chem>Oc1ccc(O)c(c1)[S+](=O)(O</chem>                      | 0 |   |
| <chem>Cc1nc(C)c(Cl)</chem>                                 | 0 | 0 |
| <chem>OC1=Nc2ccc(cc2C(=NC1)c3ccccc3)N(=O</chem>            | 0 |   |
| <chem>OC(=O)CN=N#N</chem>                                  | 0 |   |
| <chem>CC(C)(C)NC(=O)\C=C\c1oc(cc1)[N+](=O)</chem>          | 1 |   |
| <chem>Cc1cc(NC2CCCC2)nc(n1)n</chem>                        | 0 |   |
| <chem>CCC(=O)[O-]</chem>                                   |   | 0 |
| <chem>FC(F)(F)C1(C</chem>                                  | 0 |   |
| <chem>CCCN(CCCC)CC(O)c1cc(Cl</chem>                        | 1 |   |
| <chem>CC1(C)S[C@@H]2[C@H](NC(=O)C(C(=O)[O-])c3ccccc</chem> |   | 0 |
| <chem>CC(=O)OC1Cc2c3ccc4ccccc4c3cc5ccc(C)</chem>           | 1 |   |
| <chem>CC(Cc1cccc(c</chem>                                  | 1 | 0 |
| <chem>OC1N=C(c2ccccc2Cl)c3cc(Cl)ccc3NC1=O</chem>           |   | 0 |
| <chem>Nc1nc(NC2C</chem>                                    | 0 | 0 |
| <chem>[O-][N+](=O)c1ccc2ccc3ccccc3c2c1</chem>              | 1 |   |
| <chem>CC(=O)Nc1ccc(cc1)S(=O)(=O)Nc2cccn2</chem>            | 0 |   |
| <chem>C(N1CCC2(CC1)CCc3ccccc2</chem>                       | 0 |   |
| <chem>Cc1c(C(=O)O</chem>                                   | 0 | 0 |
| <chem>OP1(=NCCCO1)N(CCCl)CCCl</chem>                       | 1 |   |
| <chem>Nc1ccc2C(=O)c3cc(N)ccc3C(=O)c2c1</chem>              | 1 |   |
| <chem>OC[C@H]1O[C@@H](Oc2ccc(O)c3C(=O</chem>               | 1 |   |
| <chem>Nc1nc(N)nc(Cl)n1</chem>                              | 0 | 0 |
| <chem>COc1c2OC(=</chem>                                    | 0 | 1 |
| <chem>OS(=O)(=O)c1ccc(cc1N(=O)=O)N(=O)=C</chem>            | 0 | 0 |
| <chem>CN1C2CCCC1C</chem>                                   | 1 |   |
| <chem>CCOCN(C(=O)CCl)c1c(C)cccc1CC</chem>                  | 0 |   |
| <chem>CC(C)C12CC1C(C)C(=O)C2</chem>                        | 0 |   |
| <chem>C=CN1CCCCC1=O</chem>                                 |   | 0 |
| <chem>CC(=C)CCl</chem>                                     |   | 0 |
| <chem>COc1cc(N)c2C(=O)c3ccccc3C(=O)c2c1N</chem>            | 1 |   |
| <chem>CC(C)CCCC(C)</chem>                                  | 0 |   |
| <chem>C[C@@H]1[C@H]2[C@H](</chem>                          | 0 | 0 |
| <chem>C[S+](=O)([O-])c1ccc(cc1)</chem>                     | 0 |   |

|                                           |   |   |     |
|-------------------------------------------|---|---|-----|
| OCC1COCC(C(O)C(O)C1O)c                    | 0 |   |     |
| NCC(O)c1cc(i                              | 0 | 0 |     |
| CC(Cl)(Cl)C(=O)O                          |   |   | 0 0 |
| Oc1c(N=Nc2i                               | 0 | 0 | 0   |
| C[C@@H](Cl                                | 1 |   |     |
| CCCCCCCCCCCC[P+](CCCCC)(CCCCC)CCCCC       |   |   | 1   |
| CCCCC=N(=O)O                              |   | 0 |     |
| CCO                                       |   | 0 | 0   |
| CN(C)CC[C@@H](c1ccccc1)c2ccccc2           |   | 0 |     |
| Cc1ccc(CC[C@@H]2CO2)cc1                   |   | 1 |     |
| NC(CSC(F)(F)C(F)(F)C(F)F)C(=O)O           |   | 0 |     |
| Cc1ccc(cc1S(=O)(=O)O)N=Nc2c(O)ccc3c       |   | 0 |     |
| CC(C)(N=O)N(=O)=O                         |   | 1 |     |
| C[C@H](CCO)CCC=C(C)C                      |   |   | 0   |
| CCCCCCCCCCCCCCCCCCCCCCCCCCCC(=O)(         |   | 0 |     |
| NC(CSC(F)(F)C(F)Cl)C(=O)O                 |   | 0 |     |
| CC(=O)O[C@@H]1Cc2c3ccc4cccc4c3cc          |   | 1 |     |
| CCCCN(N)CCCC                              |   | 0 |     |
| C\C=C/[C@(<                               | 0 | 0 |     |
| CC(N(O)C(=O)N)c1cc2cccc                   |   | 0 | 0   |
| COc1c2CN(C)                               | 0 | 0 |     |
| CC(O)[C@H]1CC[C@H]2[C@@H]3CC[C@@H]4C[C@(< |   |   | 0   |
| Cc1cccc2c1ccc3cc4cccc4cc23                |   | 1 |     |
| Oc1ccc2ncccc2c1                           |   | 0 |     |
| [O-]C(=O)P(=                              | 0 | 0 | 0   |
| C\C=C(/C)\C(=O)OC\C=C(/C)\CCC=C(C)C       |   |   | 0   |
| N1C2C1c3csc3c4csc24                       |   | 1 |     |
| COc1ccc(CCN                               | 1 | 0 |     |
| N[C@@H](CSS(=O)(=O))[C                    |   | 0 |     |
| CCCCCCC1CCOC1=O                           |   |   | 0   |
| CC(C)CCC[C@                               | 0 | 0 |     |
| CCOC(=O)O(i                               | 0 | 0 |     |
| CCCN(CCC)S(                               | 0 |   | 0 0 |
| OC1OCC=C2OC(=O)C=C12                      |   | 0 |     |
| Nc1ccc(Oc2ccccc2)cc1                      |   | 1 |     |
| CN(Cc1ccccc1)N=O                          |   | 1 |     |
| ClC(=C(Cl)C=O)Cl                          |   | 1 |     |
| CC(C)(NC(=O)c1cc(Cl)cc(Cl)c1)C#C          |   |   | 0   |
| CCCCOCC=O                                 |   | 0 |     |
| CC\C=C(\c1ccc(OCCN(C)C)cc1)/c2ccc(O       |   | 0 |     |
| NC(=O)c1ccc2[nH]ccc2c1                    |   | 0 |     |
| OC(=O)CF                                  |   |   | 0   |
| O=CN1CCCCC1C2CC[C@H]:                     |   | 0 |     |

|                                                |   |   |
|------------------------------------------------|---|---|
| CC(C)NCC(O)COc1cccc2CC(COc12)O[N+]             | 0 |   |
| O=C(c1cccc1)c2cccc2                            | 0 | 0 |
| FC(F)(F)COc1                                   | 1 | 0 |
| OCC(CO)N[C@@H]1C[C@](O)(CO)[C@H]               | 0 |   |
| CC(C)(C)c1ccc(cc1)c2ccc(cc2)[N+](=O)[C         | 0 |   |
| Cl[C@H]1C=C[C@@H]2[C@@H]1[C@@                  | 0 |   |
| OCC(O)COCC=C                                   |   | 0 |
| O=C(N[C@@                                      | 0 | 0 |
| COc1ccc(cc1N(=O)=O)C(=Nc2cccc2)O               | 1 |   |
| BrC1CCCC(C=O)c1                                |   | 0 |
| Cc1c(Br)c(Br)c(Br)c(Br)c1Br                    | 0 |   |
| CC(C)CCCC(C)C1CCC2C(=CC=C3CC(O)CCC             | 0 |   |
| Nc1nc2CCN(                                     | 0 | 0 |
| Clc1cc(cc(Cl)c1Cl)N(=O)=O                      |   | 0 |
| OC1=C(Oc2cc(O)cc(O)c2C1                        | 0 | 0 |
| CC(C)CC(=O)Oc1ccc(C)cc1                        |   | 0 |
| CCCCN(C[C@@H](O)C1=CC(=[N+]=[N-]))             | 1 |   |
| C[n+]1cccc(c1)C(=O)O                           | 0 |   |
| CC(=O)Nc1ccc(cc1)c2ccc(NC(=O)C)cc2             | 1 |   |
| CCCC(=O)O[C@@]1([C@@H](C)C[C@H]2[C@@H]3C       |   | 1 |
| C1CCc2c(C1)cc3c4cccc4cc5c6cccc6c2c             | 1 |   |
| C\C=C\c1ccc2OCOc2c1                            | 0 | 0 |
| C[C@H](N)C(=O)O                                | 0 |   |
| Oc1cc2cccc3ccc4ccc(c1c4c23)[N+](=O)[           | 1 |   |
| Nc1nc(O)c2c                                    | 0 | 0 |
| OC(=O)c1ccc(cc1N(=O)=O)N(=O)=O                 | 1 |   |
| N(c1cccc1)c2ccc(Nc3cccc3)cc2                   | 1 | 1 |
| Cc1ccc2nc3c(cc2c1)c4cccc5cccc3c45              | 0 |   |
| CCCCCCC(=O)                                    | 1 | 0 |
| O[C@H]1C=Cc2c(ccc3c4CCC(=O)c4cc(c2             | 1 |   |
| NC[C@@H]1CC[C@H](CC1)C(=O)Oc2ccc(CCC(=O)O)c    |   | 0 |
| CC(=C)c1cccc1                                  | 0 | 0 |
| BrC1c(Br)c(B                                   | 0 | 0 |
| C[C@@H]1CC[C@H]2[C@@H](C)C(=O)O[C@@H]3O[       |   | 0 |
| [O-][N+](=O)c1ccc2cc(c3ccc(cc3c2c1)[N          | 1 |   |
| CCC(CC)CO                                      |   | 0 |
| Cc1c(cccc1[N+](=O)[O-])[N+](=O)[O-]            | 1 |   |
| COCC1CN(C(=O)O1)c2ccc3nc(sc3c2)C(O             | 0 |   |
| CC1OC(CC(O)                                    | 0 | 1 |
| OC1C(Oc2ccc3ccc4cc5cccc5c6ccc2c3c4             | 0 |   |
| C1O[C@@H]1c2cc3c4cccc4ccc3c5cccc               | 1 |   |
| CC(=CCC\C(=C\C\C\C(=C\C(CCC(=CCCC(=O)C)C)\C)\C |   | 0 |
| CN(C[C@@H](CC[N+]12CCC(CC1)(CC2)C3CCCC3)c4cc   |   | 0 |

|                                              |   |   |   |
|----------------------------------------------|---|---|---|
| Nc1ccc(Oc2ccc(N)c(N)c2)cc1                   | 1 |   | 1 |
| CC1CCCC2(C)CCCC12O                           | 0 |   |   |
| CN(Cc1cccc(C)c1)N=O                          | 1 |   |   |
| COc1ccc(NOS(=O)(=O)O)cc1N                    | 1 |   |   |
| C[C@@H]1CN(CC[C@]1(C(=O)O)c2ccccc2)[C@@H]3C  |   |   | 0 |
| CCC(CC)Nc1c(cc(C)c(C)c1N(=O)=O)N(=O)=O       |   |   | 1 |
| OS(=O)(=O)Oc1ccc2cc3ccc4cccc5ccc(c2          | 0 |   |   |
| Clc1ccc(NC(=O)c2csc(c2)N(=O)=O)cc1           | 1 |   |   |
| COP(=S)(OC)Oc1nc(Cl)c(Cl)cc1Cl               | 0 |   | 1 |
| O=P1Oc2cccc2c3cccc13                         |   |   | 0 |
| Fc1ccc(cc1)C                                 | 1 |   |   |
| Oc1cc2[C@H                                   | 1 | 0 |   |
| NC(=O)N(CCC(=O)O)N=O                         |   | 1 |   |
| CNCCCCCCCCSc1nc(ccc1C(                       |   | 1 |   |
| NC(=O)c1ncr                                  | 0 | 0 |   |
| COCC(=O)N(                                   | 0 | 0 | 0 |
| COc1cccc1C                                   | 1 |   | 1 |
| CC(C)(C)c1cc(ccc1N=O)c2ccccc2                |   | 1 |   |
| C[C@H](CSC(=O)C)C(=O)N1CCC[C@H]1C(=O)N[C@@   |   |   | 0 |
| CCOC(=O)CC(C)C                               |   | 0 | 0 |
| COC(=O)CS                                    |   |   | 0 |
| CC(C)CN1C(=                                  | 0 |   |   |
| CC(C)CCC(=O                                  | 1 |   |   |
| O[C@H]([C@                                   | 1 | 0 |   |
| OC1C2OC2C3=C(C=CC4C3c5cccc6cccc4c!           |   | 1 |   |
| CC(=O)C(=O)[O-]                              |   |   | 0 |
| OC(=O)[C@@                                   | 0 | 0 | 0 |
| [O-][N+](=O)c1ccc(\C=N\c2snc3ccccc23         |   | 1 |   |
| CCCCCCCCCCCCCN(OC(=O)C)c1ccc2c(Cc            |   | 1 |   |
| C(Oc1ccc(Cc2ccc(OCC3CO3)cc2)cc1)C4CO4        |   |   | 0 |
| CC(CCC=C(C)C)CC=O                            |   | 0 |   |
| CC1CCCC1                                     |   | 0 |   |
| CC#CCC(C)[C@H](O)\C=C\C1[C@H](O)C[C@@H]2\C\C |   |   | 0 |
| Nc1ccc(cc1)S(=O)(=O)Nc2cnc3c(Cl)cccc         |   | 0 |   |
| N#Cc1cccc(c1)C#N                             |   | 0 | 0 |
| CC[C@@H](Cl)[N+](=O)[O-]                     |   | 1 |   |
| CSc1ccc(cc1)                                 | 0 | 0 | 0 |
| CCCCOC(=O)C=C                                |   | 0 |   |
| OCC1O[C@@                                    | 0 | 0 |   |
| Nc1ccc2C(=O)c3ccccc3C(=O)c2c1N               |   | 1 |   |
| C=CC(=O)OCCOC(=O)C=C                         |   | 0 | 0 |
| C[C@@H]1[C@@H]2Cc3ccc(O)cc3[C@@]1(C)CCN2C    |   |   | 0 |
| CC(=O)NC(CS\C(C(=C(F))\C(F)(F)F)\F)C(=       |   | 0 |   |



|                                                   |   |   |   |   |
|---------------------------------------------------|---|---|---|---|
| N[C@@H](Cc1ccc(O)c(O)c                            | 0 | 0 | 0 |   |
| OC(=O)Cc1cc                                       | 0 | 0 | 0 | 1 |
| [O-][n+]1cc[r                                     | 0 | 0 | 0 |   |
| CCCCCCCCCCCC(=O)O[C@@H]1[C@H                      |   | 0 |   |   |
| CC(=C)C(=O)OCCNC(C)(C)C                           |   |   | 0 |   |
| NC(=O)C[C@H](NC(=O)Cc:                            | 0 |   |   |   |
| CC(=O)NC(CCC(=O)N)C(=O)O                          |   |   | 0 |   |
| COc1c(CO)c(O)cc2C(=O)c3cccc3C(=O)c                |   | 1 |   |   |
| Cc1cccc1[N+](=O)[O-]                              |   | 0 |   |   |
| OCC1OC(C(O                                        | 0 | 0 |   |   |
| COc1cc(ccc1(                                      | 0 | 0 |   |   |
| COC(=O)c1cc2ccc3cccnc3c2[nH]1                     |   |   | 0 |   |
| CC(=O)c1c(O                                       | 0 | 0 |   |   |
| Cc1c(cccc1[N+](=O)[O-])N=[N+](                    |   |   | 0 |   |
| OC(=O)C1=C(                                       | 0 | 0 |   |   |
| CN(C[C@H](O)CO)N=O                                |   |   | 1 |   |
| CC(O)C(NC(=O)C(C)C(O)C(C)NC(=O)C(NC(=O)c1nc(nc(   |   |   | 0 |   |
| OC1C=Cc2cc3c(ccc4cccc34)c(c2C1O)[N                |   | 1 |   |   |
| C[N+](C)(CCC                                      | 0 | 0 |   |   |
| CC1CCCC1NC(=O)Nc2cccc2                            |   |   | 0 | 1 |
| [O-][N+](=O)c1cc(Cl)c(Cl)cc1Cl                    |   |   | 1 |   |
| NCCCNCCSP(                                        | 0 | 0 |   | 0 |
| [O-][N+](=O)c1c2cccc2cc3c1ccc4cccc:               |   |   | 0 |   |
| [O-][N+](=O)c1ccc(cc1)S(=O)(=O)Nc2cc              |   |   | 0 |   |
| Nc1nc2c(Cl)cccc2s1                                |   |   | 0 | 1 |
| NCCCC(N)C(=O)NC(Cc1c[nH]c2cccc12                  |   |   | 0 |   |
| OC(=O)CCCc1ccc(NCCCl)cc1                          |   |   | 1 |   |
| Cc1cccc(C)c1N(=O)=O                               |   |   |   | 0 |
| Cn1c(N)nc2c3ccncc3ccc12                           |   |   | 1 |   |
| CC(CCC#N)C#N                                      |   |   | 1 | 0 |
| Fc1cccc(\C=                                       | 0 | 0 |   |   |
| COc1cc(CC=C                                       | 0 | 0 | 0 | 0 |
| CC(=O)Nc1c(l)c(NC(=O)C)c(l)c(C(=O)O)c1l           |   |   |   | 0 |
| Oc1ccc(cc1)C2(CC3CC2C4CCCC34)c5ccc(O)cc5          |   |   |   | 1 |
| OC(=O)\C=C\c1ccc(Cl)cc1                           |   |   | 0 |   |
| CC(=O)\C=C\c1occc1                                |   |   | 0 |   |
| Cc1cnc(cn1)C                                      | 0 | 0 |   |   |
| CCOC(C)OCC                                        | 0 | 0 |   | 0 |
| CCCCN(CCC(=O)OCC)C(=O)C                           |   |   |   | 0 |
| CCc1c(C)c2cc3[n-]c(cc4nc(C(CCC(=O)[O-])C4C)c(CC(= |   |   |   | 0 |
| CCC1=C(C(C)C2cc(O)ccc12)c3ccc(O)cc3               |   | 0 |   |   |
| OCC(S)CS                                          |   |   |   | 0 |
| CC(=O)CC(C)(C)C1CCCC1                             |   |   |   | 0 |

|                                                      |   |   |   |
|------------------------------------------------------|---|---|---|
| COC(=O)C1CCC(CC1)C(=O)OC                             |   |   | 0 |
| [O-][N+](=O)c1ccc2c(c1)cc(c3ccc(cc23))               | 1 |   |   |
| COC(=O)[C@@]1(O[C@@]1(C)[C@H](C                      | 1 |   |   |
| CC(C)CN(C[C@@H](O)[C@H](Cc1cccc1)NC(=O)O[C@          |   |   | 0 |
| O=C1OC(=O)C2CC=CCC12                                 |   |   | 0 |
| FC1(F)C(F)(F)C(F)(F)C2(F)C(F)(C1(F)F)C(F)(F)C(F)(F)C |   |   | 0 |
| O[C@H]1C=Cc2ccc3nc4ccc5cccc5c4cc3                    | 1 |   |   |
| O1C=CC2C1Oc3cccc23                                   | 1 |   |   |
| CCN(CC)[S+](=O)([O-])c1c                             | 0 |   |   |
| CN(C)CCCOc1                                          | 1 | 0 | 0 |
| COC(=O)[C@H]1[C@@H](                                 | 0 |   |   |
| CCN(Cc1cccc(c1)S(=O)(=O)[O-])c2ccc(cc2)C(=C3C=CC     |   |   | 0 |
| OC(=O)C1=CCCN(CCON=C(                                | 0 |   |   |
| Cc1cc(c(C)c2c3cccc3[nH]c12)N(=O)=O                   | 1 |   |   |
| COC(C)(C)CCO                                         |   |   | 0 |
| COc1ccc(CCN                                          | 1 | 1 | 0 |
| CCCCC\C=C\c1cccc1)\CO                                |   |   | 1 |
| [O-][N+](=O)c1ccc2ccc3c(ccc4ccc1c2c3                 | 1 |   |   |
| CC(=O)N\N=                                           | 0 | 0 |   |
| C1CCc2cccc2C1                                        |   |   | 0 |
| Cc1c(\C=N\OCc2cccc2)c3cc(ccc3n1Cc4                   | 1 |   |   |
| CC1(C)C2CC3OC3(C)C1C2                                | 0 |   |   |
| BrCC(Br)CBr                                          | 1 |   |   |
| OCCCCO                                               |   |   | 0 |
| OCc1cc(ccc1(                                         | 1 | 1 |   |
| [O-]C(=O)CN                                          | 0 | 0 | 0 |
| Nc1cc(Cl)ccc1[N+](=O)[O-]                            | 1 |   |   |
| CCCCN1CCC(                                           | 1 |   |   |
| CN(C)CCCN1c2cccc2C(C)(                               | 1 |   |   |
| ClC(=O)OCc1cccc1                                     | 0 |   | 0 |
| Oc1ccc(\C=C'                                         | 1 | 0 |   |
| CC(C)C(O)C(C)(C)COC(=O)C(C)C                         |   |   | 0 |
| CCCCCCCCCCCCC(=O)OCCC1CCN(CCCN2c3cccc3Sc             |   |   | 0 |
| NC(=O)c1cc[                                          | 0 | 0 |   |
| BrCc1c2cccc3ccc4cc5cccc6ccc1c(c56)c4                 | 1 |   |   |
| CC(=CCC\C=C/C=O)\C)C                                 | 0 |   |   |
| COC(CC(C)CCCC(C)(C)O)OC                              |   |   | 0 |
| OC1C(COC(=O)c2cccnc2)(COC(=O)c3cccnc3)CCCC1(CC       |   |   | 0 |
| C(CN1CCN(C                                           | 1 | 0 |   |
| CC1CCC(C(=O)C1)C(C)(C)S                              |   |   | 0 |
| C[C@H]1CC[                                           | 0 | 0 |   |
| CC1(C)O[C@                                           | 0 |   |   |
| CCCc1cc2cccc2c3ccc4C(O)C(O)C5OC5c                    | 0 |   |   |

|                                                                                    |   |   |   |
|------------------------------------------------------------------------------------|---|---|---|
| CCCCCN(CCC(=O)C)N=O                                                                | 1 | 0 |   |
| CC(=O)Oc1ccc(CCl)cc1                                                               |   |   | 1 |
| Cc1cc2c3ccccc3[nH]c2nc1N                                                           |   |   | 1 |
| Cc1cc(C)c(cc1N=Nc2cc(c3ccccc3c2O)S(=O)(=O)C1c2ccccc2C(=O)c3ccccc13                 |   |   | 0 |
| NC(=O)C1=CN(C=CC1)C2O                                                              |   | 0 |   |
| OC[C@H]1O[C@H](O[C@H]2O[C@H](CO)[C@@H](C)C)NC(=O)NC(C)C                            |   |   | 0 |
| CNC(=NC#N)NCCSCc1nc[nH]c1                                                          |   | 0 |   |
| CCN(CC)C(=O)Nc1ccc(OCC(O)CNC(C)C)cc1                                               |   | 0 | 0 |
| CCOC(=O)\C=O                                                                       | 0 | 0 |   |
| Oc1c2ccccc2c3ccc4cccc5ccc1c3c45                                                    |   |   | 1 |
| Cc1cc(C(O)c2ncc([N+](=O)[O-])n2C)c(O)cc1                                           |   |   | 0 |
| CC(C)C[C@@H](NC(=O)[C@@H](O)[C@H](N)Cc1ccccc1)C(=O)Nc1ccc2C(=O)C(=O)c3ccccc4ccc1c2 |   |   | 0 |
| CC1(C)CCC[C@@]2(C)[C@H]1CC[C@@]3(C)OCC[C@H]2C3                                     |   |   | 1 |
| CCCCCCCCOCCC#N                                                                     |   |   | 0 |
| Cc1ccc2cc3c(ccc4ccccc34)cc2c1                                                      |   | 1 |   |
| NCC1CCCC(CN)C1                                                                     |   |   | 0 |
| Nc1cc2nc3ccccc3nc2cc1N                                                             |   | 1 |   |
| COc1ccc(\C=C\C(=O)c2ccc(O)cc2)cc1                                                  |   | 0 |   |
| Nc1ccc(N)c2C(=O)c3c(N)ccc(N)c3C(=O)O                                               |   | 1 |   |
| C[C@H](CO)[N+](=O)[O-]                                                             |   | 0 |   |
| CCN(CC)C(C)C                                                                       | 0 | 0 | 0 |
| OC(=O)C[C@H]([C@H](CC(=O)O)C(=O)C)C                                                |   | 1 |   |
| CC1CCc2c1ccc3c2ccc4ccccc34                                                         |   | 1 |   |
| OC1C=Cc2ccc3cc4c(ccc5ccccc45)cc3c2C                                                |   | 1 |   |
| CCCN1CCO[C@H]1                                                                     | 0 | 0 |   |
| CN1CCNCC1                                                                          |   |   | 0 |
| CN(C)[C@@H]1O[C@H](O)[C@H](O)[C@H]1O                                               | 0 | 0 |   |
| O[C@H]1[C@H](O)[C@H](O)[C@H]([C@H]1O)C                                             |   | 1 |   |
| [O-][N+](=O)c1oc(C=C(C#N)C#N)cc1                                                   |   | 1 |   |
| CC(C)CCCC(C)CC=O                                                                   |   |   | 0 |
| CCCCCCCCCCCC1CO1                                                                   |   | 0 | 0 |
| OCC(O)Cl                                                                           |   | 1 |   |
| CN(C)CCCNc1c2ccccc2nc3c(C)ccc(c13)[N+](=O)[O-]                                     |   | 1 |   |
| O=N(=O)c1cc2c3ccccc3c4cccc(c1)c24                                                  |   | 1 |   |
| CC1=C(CCN2C)C2                                                                     | 1 |   | 0 |
| Oc1ccc(cc1)C(c2ccc(O)cc2)(C(F)(F)F)C(F)(F)F                                        |   |   | 1 |
| Nc1on[n+](c1)N2CCOCC2                                                              |   | 0 | 0 |
| CC(=O)OC1(CCC2C3CCC4=CC(=O)CCC4(C)C)C                                              |   | 0 |   |
| COc1ccc(C[C@H]2COC(=O)C)cc1                                                        |   | 0 |   |

|                                            |   |   |   |   |
|--------------------------------------------|---|---|---|---|
| COc1cc2c(C)c3N(C)CCc4cc                    | 0 |   |   |   |
| CC(=O)OC1C2OC(=O)C(OC(=O)C)C2OC1:          |   | 0 |   |   |
| C(SSCc1ccccc1)c2ccccc2                     |   | 1 |   |   |
| Cc1cc(C)c(N)c(C)c1N                        |   | 1 |   |   |
| CC1=CC(=O)Oc2cc(N)ccc12                    |   | 0 |   |   |
| Nc1ccncc1                                  | 0 | 0 |   | 0 |
| CCOc1ccccc1                                | 0 | 0 | 0 | 0 |
| CCOC(=O)CC                                 |   |   |   | 0 |
| CN1CCC(CC1)                                | 1 | 1 |   | 1 |
| CS(=O)(=O)N1N=CC(=C(Cl)C1=O)Cl             |   | 1 |   |   |
| Nc1ccc(cc1)c2ccc(cc2)N(=O)=O               |   | 1 |   |   |
| [O-][N+](=O)c1cc(cc(c1)[N+](=O)[O-])[I     |   | 1 |   |   |
| O=N(=O)c1ccc2c(cc3ccccc3c2c1)N(=O)         |   | 1 |   |   |
| CC(=CCCC(C)(OC=O)C=C)C                     |   |   |   | 0 |
| NC1=Nc2c(ncn2[C@H]3C[C@H](O)[C@@H](CO)C3=C |   |   |   | 0 |
| CN1C=CNC1=S                                |   |   |   | 0 |
| CC1CCC2CC1C2(C)C                           |   | 0 |   | 0 |
| N#Cc1cscn1                                 |   |   |   | 0 |
| COc1ccc(N(CCCl)CCCl)c2cc(oc12)[N+](=O      |   | 1 |   |   |
| C1CNCCN1                                   |   | 0 |   | 0 |
| CCCCC1cc(O)c2C3C=C(C)CCC3C(C)(C)Oc         |   | 0 |   |   |
| CC[C@@H](C)[C@H]1O[C@                      |   | 0 |   |   |
| OC(CN=N#N)c1ccccc1                         |   | 1 |   |   |
| [O-][N+](=O)c1ccc(CN2C3C2c4ccccc4c5        |   | 1 |   |   |
| CCCOCC(C)O                                 |   |   |   | 0 |
| NCCc1c[nH]cn1                              |   | 0 | 0 | 0 |
| FC(F)(F)C(F)(                              | 0 | 0 |   | 0 |
| CC(CCC(=O)O)(N=NC(C)(CCC(=O)O)C#N)C#N      |   |   |   | 0 |
| O=CC=Cc1ccccc1                             |   |   |   | 0 |
| COc1cc2C(=O)CCc2c3ccc4ccccc4c13            |   | 1 |   |   |
| Nc1c2ncn(C(c3ccccc3)c4ccccc4)c2nc[n+]      |   | 1 |   |   |
| Cc1cc(C)c(C)c(C)c1                         |   | 0 |   |   |
| CO[C@@H]1                                  | 0 | 0 |   | 0 |
| Nc1ncnc(Nc2                                | 0 | 0 |   | 0 |
| OC1C=Cc2c(cc3c4ccccc4c5c6ccccc6cc2c:       |   | 1 |   |   |
| CCn1cc[n+](C)c1C                           |   |   |   | 0 |
| Cn1c(N)nc2ccccc12                          |   | 1 |   |   |
| CC(C)(C)C1CCCCC1=O                         |   |   |   | 0 |
| C[C@]12CC[C@                               | 0 | 1 |   | 0 |
| OCC1OC(C(O)C1O)n2cnc3c(NCc4ccc(cc4         |   | 0 |   |   |
| Cc1ccccc1N2CCN(CCC3nnc4CCCCn34)CC2         |   |   |   | 0 |
| CN(C)[S+](=O)([O-])c1ccc2                  |   | 1 |   |   |
| OC[C@H]1O[C@H]([C@H]                       |   | 0 |   |   |

|                                                 |   |   |   |
|-------------------------------------------------|---|---|---|
| CCCC(CC)c1ccccc1                                |   |   | 0 |
| O=C1CC(=O)c2ccccc2C1=O                          | 1 |   |   |
| CN(CCCCO)N=O                                    | 1 |   |   |
| CCCCCCCCCCCCc1ccc(cc1)S(=O)(=O)O                | 0 |   |   |
| CCOc1ccc(cc1)N=[N+][O-]c2ccc(OCC)c              | 0 |   |   |
| OC1COC(C(O)C1O)N(N=O)c2ccc(cc2)[N-              | 1 |   |   |
| OP(=O)(O)CCCI                                   |   |   | 0 |
| CCn1nc(C)c2N=C(CNC(=O)c12)c3ccc(O)cc3           |   |   | 0 |
| CO[C@H]1C=CO[C@@]2(C)Oc3c(C)c(O)c4c(O)c(NC(=    |   |   | 1 |
| CCC(=O)O[C@H]1CC[C@H]2[C@@H]3CCC4=CC(=O)C(      |   |   | 0 |
| Cc1cc(ccc1N)C(=C2C=CC(=Nc3ccc(cc3S(=O)(=O)O)S(= |   |   | 0 |
| COc1cc2OC3OC=CC3c2c4OC(=O)C5=C(C                | 1 |   |   |
| Cc1cnc2c(C)cc3c(nc(N)n3C)c2n1                   | 1 |   |   |
| CCCCc1c(C)nc(NCC)nc1O                           |   |   | 0 |
| CCOC(=O)C(C#N)c1snc2c(cccc12)[N+](=             | 1 |   |   |
| C[N+](C)(C)CCCI                                 | 0 |   | 0 |
| OCCCCCO                                         |   |   | 0 |
| CC(C)(CCP(=C                                    | 0 | 0 |   |
| OCC1CCCO1                                       | 0 |   | 0 |
| O[C@@H]([C                                      | 1 | 0 |   |
| OP(=O)(OCC(Br)CBr)OCC(Br)CBr                    | 1 |   |   |
| OC(=O)Cc1cc                                     | 0 | 0 |   |
| C1CN1                                           | 1 |   |   |
| [O-][N+](=O)c1[nH]cnc1c2ccccc2                  | 1 |   |   |
| Oc1cc(O)c2C(=O)c3c(O)ccc(O)c3Oc2c1              | 1 |   |   |
| O=N(=O)c1ccccc1C#N                              | 0 |   |   |
| CC(COc1ccccc1)NC(C)C(O)c2ccc(O)cc2              |   |   | 0 |
| CC(=O)Nc1ccc(Oc2ccc(N)cc2)cc1                   | 1 |   |   |
| CC(c1ncncc1I                                    | 0 | 0 |   |
| NC(=O)CC[C@H](Nc1ccc(cc1)N(=O)=O)C(=O)O         |   |   | 0 |
| NCCc1c[nH]c                                     | 0 | 0 |   |
| O=C(C1CO1)c2ccc3OCOc3c2                         | 1 |   |   |
| CCCCCOC(=O)NC1=NC(=O)N(C=C1F)[C@@H]2O[C@H       |   |   | 0 |
| CC[C@@H](C)COC(=O)\C=C\c1ccc(cc1)\              | 1 |   |   |
| OCCN1CCNC1=O                                    |   |   | 0 |
| CCCCCCCCCCCCI                                   | 0 |   | 0 |
| C[C@@H](C                                       | 0 | 0 |   |
| CN(C)CC(=O)O                                    | 0 |   |   |
| CC(C)(C)NCC(O)COc1ccccc2NC(=O)CCc12             |   |   | 0 |
| Nc1ccc(c2ccc(cc2N)N(=O)=O)c(c1)N(=C             | 1 |   |   |
| NC(=O)\C(=C/c1oc(cc1)[N+](=O)[O-])\c            | 1 |   |   |
| OCC(O)COP(=O)([O-])[O-]                         |   |   | 0 |
| CN1CCN(CC1                                      | 0 | 0 |   |

|                                                                                                                    |   |   |
|--------------------------------------------------------------------------------------------------------------------|---|---|
| CCCCC(CC)COC(=O)c1ccc(cc1)C(=O)O                                                                                   | 0 |   |
| CCN(CC)CCC[C@@H](C)Nc1c2ccc(Cl)cc2                                                                                 | 1 |   |
| CC1=NN(C(=O)C1N=Nc2ccccc2)c3cc(ccc3Cl)S(=O)(=O)Nc1ncnc2c1r                                                         | 0 | 0 |
| OC1CC(=CC(O)C1O)C(=O)O                                                                                             | 0 |   |
| C(=C(c1ccccc1)c2ccccc2)c3ccccc3                                                                                    |   | 1 |
| NS(=O)(=O)c1ccccc1Cl                                                                                               |   | 0 |
| NC1=NC(=O)                                                                                                         | 0 | 0 |
| CN(C)CCn1nr                                                                                                        | 0 | 0 |
| Cn1ccc2cc3N(Cc3cc12)C(=O)Nc1ccc(Cl)c(Cl)c1                                                                         | 0 |   |
| CC1(CO1)C(=O)N                                                                                                     | 1 |   |
| COc1cc(N)ccc1N                                                                                                     | 1 |   |
| CN(C)CCCN(C(=O)C(=C)C                                                                                              |   | 0 |
| CCN(CC)CC#CC(C)(C)OC(=O)C(O)(C1CCCC1)O[C@H](CNCCO)c1ccc(OCC)cc1                                                    | 0 |   |
| OC(CCl)CCl                                                                                                         | 1 | 0 |
| CCOC(=O)CNC(=O)C(C)Br                                                                                              | 1 |   |
| COc1ccc(NC(=O)C1CCCN(CCC)N=O)cc1                                                                                   | 1 | 1 |
| CCCCN(CCC)N=O                                                                                                      | 1 |   |
| OC(=O)CCCCCCC(=O)O                                                                                                 |   | 0 |
| CCCCCOC(=O)C=Cc1oc(cc1)N(=O)=O                                                                                     | 1 |   |
| CCOCCOCCOCC                                                                                                        | 0 |   |
| C[C@]12CCCC1                                                                                                       | 0 |   |
| O[C@](CCN1CCCC1)(C2CCCN(C)CCCO[C@H]1[C@H](OC1C(O)C(O)C(=O)COC(=O)c1ccccc1C(=O)OCC)C(C)N(C(C)C)C(=O)SCC(=C(Cl)Cl)Cl | 0 |   |
| OC(=O)c1cc(Br)c(O)c(Br)c1                                                                                          |   | 0 |
| Cc1oc(C)c(C(=O)Nc2ccccc2)c1C                                                                                       |   | 1 |
| CCCCC(=O)\N=C\1/SN(C(=O)CCCC)c2ccc                                                                                 | 1 |   |
| CC(=O)Oc1ccc(CO)cc1                                                                                                | 0 |   |
| CCOC(=O)COc1ccc(C)cc1                                                                                              |   | 0 |
| COc1cc2OCC3Oc4c5CC(O)c1=CC(=O)C(=O)C1=O                                                                            | 0 | 0 |
| OC1=C(O)C(=O)C1=O                                                                                                  | 0 | 0 |
| CN(C)CCCO[C@H]1[C@H](OC1C(O)C(O)C(=O)COC(=O)c1ccccc1C(=O)OCC)C(C)N(C(C)C)C(=O)SCC(=C(Cl)Cl)Cl                      | 0 |   |
| CON(C(=O)OC)c1ccccc1COc2ccn(n2)c3ccc(Cl)cc3                                                                        |   | 1 |
| CN(C\C=C\C1CCCC1)Cc2cccc3ccccc23                                                                                   |   | 0 |
| CC(Cc1ccc(O)c(O)c1)(NN)C(=O)O                                                                                      | 1 |   |
| CC(C)CN(C[C@@H](O)[C@H](O)C(=O)O)C(=O)O                                                                            | 0 |   |
| CCCC(=O)OC1CCCCC1                                                                                                  | 0 |   |
| [O-][N+](=O)c1ccc(\C=C\C=C\C=O)cc1                                                                                 | 1 |   |
| CC(=O)c1cc(C)oc1C                                                                                                  |   | 0 |

|                                                   |   |   |   |   |
|---------------------------------------------------|---|---|---|---|
| Cc1c2ccccc2c(CBr)c3c1ccc4ccccc34                  |   |   | 1 |   |
| BrC\C=C\CBr                                       |   |   |   | 0 |
| Nc1c(CC(=O)                                       | 0 | 0 |   |   |
| C=CCSSSCC=                                        | 0 | 0 |   | 0 |
| CN(C)C1CSSSC1                                     |   |   |   | 0 |
| Cc1ccc(cc1)S(=O)(=O)NN                            |   |   | 1 |   |
| C[C@H](N)Cc1cccc(c1)C(F                           |   | 0 |   |   |
| CC(CCC(=O)O)C1CCC2C3CCC4CC(O)CCC4                 |   |   | 0 |   |
| CC(=O)c1cccn1[N+](=O)[O-]                         |   |   | 1 |   |
| CC(=O)C=O                                         |   |   | 1 |   |
| Nc1ncnc2c1ncn2[C@@H]                              |   | 0 |   |   |
| CC(=O)OC1C                                        | 0 | 0 |   |   |
| CCN=N(=O)CC                                       |   |   | 0 |   |
| CCOC(=O)[C@H](CCc1ccccc1)N[C@@H](C)C(=O)N2C       |   |   |   | 0 |
| Oc1ccc(O)c2C(=O)c3ccccc3C(=O)c12                  |   |   | 1 | 1 |
| c1ccc2cc3c(ccc4cccnc34)cc2c1                      |   |   | 1 |   |
| Fc1cccc(Cn2c(cc3cc(F)ccc23)C(=O)Nc4ccc5[nH]ccc5c4 |   |   |   | 1 |
| OC1c2ccccc2c3ccc(cc13)N(=O)=O                     |   |   | 1 |   |
| NNC(=O)CNC(=O)C=[N+]=[N-]                         |   |   | 1 |   |
| CCCCNS(=O)(=O)c1ccccc1                            |   |   |   | 0 |
| OS(=O)(=O)OCc1c2ccccc2cc3c1ccc4ccccc              |   |   | 1 |   |
| OC1C(O)c2c(Cl)c3ccccc3cc2c4ccccc14                |   |   | 0 |   |
| Clc1ccnc1Cl                                       |   |   | 1 |   |
| Cc1ccccc1OCC(=O)O                                 |   |   |   | 0 |
| ClCCNCCCl                                         |   |   | 1 |   |
| N#N=Nc1nc2ccccc2[nH]1                             |   |   | 1 |   |
| CCc1c(nn(c2ccc(Cl)cc2Cl)c1c3ccc(Br)cc3)C(=O)NN4CC |   |   |   | 1 |
| N[C@H]1C(O)O[C@H](CO)[C@@H](O)[C@@H]1O            |   |   |   | 0 |
| C[N+](C)(C)C                                      | 0 | 0 |   | 0 |
| CCc1c(C)c(C(=O)c2cccc3c                           |   | 1 |   |   |
| C[N+](C)(C)CCNCCc1ccc(cc1)N=Nc2ccc(c              |   |   | 1 |   |
| N[C@@H]1C                                         | 0 | 0 | 0 |   |
| Nc1cc(C(=O)O)c(O)c(c1)S(=O)(=O)O                  |   |   | 0 | 0 |
| BrCC(Br)CCOP(=O)(OCCC(Br)CBr)OCCC(I               |   |   | 0 |   |
| Oc1c(Br)cc2c(Oc3c(Br)c(O)c(Br)cc3C24              |   |   | 1 |   |
| CCc1c(ncc2[r                                      |   | 0 |   |   |
| CCN1C=C(C(=O)O)C(=O)c2cc(F)c(c(F)c1               |   |   | 1 |   |
| [O-][N+](=O)c1cccc2cc(c3ccccc3c12)[N-             |   |   | 1 |   |
| CCc1ccccc1N(=O)=O                                 |   |   | 0 |   |
| [O-][N+](=O)c1ccc(c2ccccc2)c(c1)[N+](             |   |   | 1 |   |
| COc1cc(ccc1NC(=O)C)[N+](=O)[O-]                   |   |   | 1 |   |
| NC1=NC(=O)N(C=C1)C2C=C(CO)C(O)C2C                 |   |   | 0 |   |
| CCC(=O)N(C1CCN(CCC2ccccc2)CC1)c3ccc(F)cc3         |   |   |   | 0 |

|                                                      |   |   |   |   |
|------------------------------------------------------|---|---|---|---|
| CN1C(=O)CC(C)(C1=O)c2ccccc2                          |   |   |   | 0 |
| [O-][N+](=O)c1ccc(NC(=O)NCCCl)s1                     | 1 |   |   |   |
| Oc1cccc2cc3cccc(O)c3c(O)c12                          | 0 |   |   | 1 |
| Cl\C=C(/Cl)\c1c(Cl)c(Cl)c(Cl)c(Cl)c1Cl               | 0 |   |   |   |
| CC(C)(C)OC(=O)C=Cc1oc(cc1)N(=O)=O                    | 1 |   |   |   |
| S=C(NC1CCCCC1)NC2CCCCC2                              | 0 |   |   | 1 |
| Cc1nc2ccc3ccc4ccc(O)cc4c3c2n1C                       | 1 |   |   |   |
| Clc1ccc(cc1Cl)C(Cl)(Cl)Cl                            | 1 |   |   |   |
| CCSCCOP(=S)(OC)OC                                    | 0 |   |   |   |
| S=C1NC=NC2N=CNC12                                    |   |   |   | 1 |
| CC(C)SCc1occc1                                       |   |   |   | 0 |
| ON(=O)=CCl                                           | 1 |   |   |   |
| CC[C@@H]1[C@@H]2C[C@@H]3C                            | 0 |   |   |   |
| CCN(C(=O)CCCCl)c1snc2ccccc12                         | 0 |   |   |   |
| OCC(O)CO                                             | 0 | 0 | 0 | 0 |
| COC(=O)CCS                                           |   |   |   | 0 |
| CCOC(=O)CP(=O)(OCC)OCC                               |   |   |   | 0 |
| CCCCN1C2C1c3ccccc3c4ccccc24                          | 1 |   |   |   |
| OC(COc1ccccc1c2ccccc2)Cl                             | 1 |   |   |   |
| C[C@@H](Cc1ccccc1)N(C)C                              |   |   |   | 0 |
| CCc1ccccc1CC                                         |   |   |   | 0 |
| NNCCc1ccccc1                                         | 0 |   |   | 0 |
| CC1CC2=C(CC1(C)C(=O)C)C(C)(C)CCC2                    |   |   |   | 1 |
| CCC(=O)[N-]S(=O)(=O)c1ccc(cc1)c2c(C)onc2c3ccccc3     |   |   |   | 0 |
| Cc1cnc(cn1)C(=O)NCCc2cc                              | 0 |   |   |   |
| CC(=O)O[C@H](C)C                                     | 0 | 0 |   |   |
| ClCc1c2ccccc2c(CCl)c3ccccc13                         | 1 |   |   |   |
| OCC=C                                                | 0 |   |   | 0 |
| Clc1ccnc2ccccc12                                     | 1 |   |   |   |
| CCCCCCCCCCCCOC(=O)c1ccccc1C(=O)O                     | 0 |   |   |   |
| Nc1cccc(c1)N(=O)=O                                   | 1 |   |   | 0 |
| FC(OC(F)(F)F)C(F)(F)Oc1ccc(NC(=O)NC(=O)c2c(F)ccc2)c1 |   |   |   | 0 |
| [O-][N+](=O)c1ccc2N(S\C(=N/C(=O)c3ccccc3)C)C2        | 1 |   |   |   |
| CCN(CC)c1ccc(cc1)N=Nc2ccc(cc2Cl)[N+]                 | 1 |   |   |   |
| OC(=O)c1ccc(Cl)c(c1)[N+](=O)[O-]                     | 1 |   |   |   |
| CC(=C)C(=O)OCC(C)(C)COC(=O)C(=C)C                    | 0 |   |   | 0 |
| OP(=O)(OCc1ccccc1)OCc2ccccc2                         |   |   |   | 0 |
| OC(CN1CCN(C)C1)C                                     | 1 |   |   |   |
| C[S+](=O)([O-])c1ccc(cc1)C                           | 0 |   |   |   |
| Cn1ccc2cc(NC(=O)Nc3cccr3)cc2                         | 0 |   |   |   |
| C\C=C\C=C\C=C\C=C                                    | 0 | 0 |   |   |
| CC(=CCCC(C)(OC(=O)c1ccccc1N)C=C)C                    | 0 |   |   | 0 |
| CC(C)Nc1ccccc1                                       | 0 |   |   | 0 |



|                                                                    |   |   |
|--------------------------------------------------------------------|---|---|
| CN(Cc1ccc2N=C(C)NC(=O)c2c1)c3ccc(s3)C(=O)N[C@H](C)C1CCc2c(C)coc2C1 | 0 | 0 |
| CC(C)CC(=O)C(=O)C                                                  |   | 0 |
| CCc1occc1                                                          | 0 |   |
| CCN(CC)C(=S)SCC(=C)Cl                                              | 1 | 0 |
| Cc1cc(C)cc(c1)[N+](=O)[O-]                                         | 1 |   |
| CN(C)c1ccc(cc1)N=Nc2ccccc2C                                        | 0 |   |
| CN(C)S(=O)(=O)CCNC(=O)N(CCCl)N=O                                   | 1 |   |
| CC(C)[C@@H]1CC[C@@H](C)CC1=O                                       | 1 | 0 |
| NC(=O)CCCC(=O)N                                                    | 0 | 0 |
| COCC(=O)O(c1ccc(O)cc1)O                                            | 1 |   |
| CCN(CC)C(=O)C(=C(C)OP(=O)(OC)OC)Cl                                 |   | 0 |
| CCCCC1ccc(c1)O                                                     | 0 | 1 |
| CC(COC(=O)C)OC(=O)C                                                |   | 0 |
| CC[C@H]1CO1                                                        | 1 |   |
| COc1cccc2C(=O)c3c(O)c4CC(O)(CC(OC5(C)C)C)C(C)C                     | 1 | 0 |
| OC[C@H]1CC[C@H](O1)n2cnc3c(O)ncnc3c(O)[O-][N+](=O)c1ccc(C=O)cc1    | 1 |   |
| BrCc1cc2c3ccccc3c4cccc(c1)c24                                      | 1 |   |
| CCCCCCCCC(C)C=O                                                    |   | 0 |
| Nc1nc(Cl)c2ncn(CC(O)CN=N#N)c2n1                                    | 1 |   |
| CC(OP(=O)(OC(C)C(Br)CBr)OC(C)C(Br)Cl)O=C1NC(=O)C(=O)C(=O)N1        | 1 | 0 |
| COc1cc(cc(O)c1)O                                                   | 0 | 0 |
| NC(=NO)c1oc(cc1)N(=O)=O                                            | 1 |   |
| Nc1ccc(Cc2ccc(N)c(Cl)c2)cc1Cl                                      | 1 | 1 |
| CCC1(C)NC(=O)NC1=O                                                 |   | 0 |
| COc1nccnc1N                                                        | 0 | 0 |
| COc1cc2OC3OCCC3c2c4oc(O)c5c(O)ccc5c1                               | 1 |   |
| CC1(C)C2CCC(=C)C1C2                                                | 0 | 0 |
| CN1C(C(=O)Nc2cccn2)C(=O)N                                          | 0 |   |
| CN1CN=C2C(=[N+](O)[C-]N=C12)N                                      | 1 |   |
| CCc1c2ccccc2c(CC)c3c1ccc4ccccc34                                   | 0 |   |
| CC[N+](C)(CC)O                                                     | 0 | 0 |
| CCCCOCC1CO1                                                        | 1 | 0 |
| Nc1ccc2ccc3c4ccccc4cc5ccc1c2c35                                    | 1 |   |
| CN(C)c1ccc(cc1)N=Nc2ccc(cc2)S(=O)(=O)C1=CC=CC=C1                   | 0 |   |
| BrCCCB                                                             | 0 | 0 |
| CC1Nc2ccc(Cl)cc2[S+](=O)C1                                         | 0 |   |
| CC(=N)NCCCC[C@H](N)C(=O)N                                          | 0 |   |
| CCC\C=C(\CC)/C=O                                                   | 0 |   |
| Nc1ccc2nc3ccccc3c(N)c2c1                                           | 1 |   |

|                                                 |   |   |
|-------------------------------------------------|---|---|
| NC(=O)CF                                        |   | 0 |
| COP(=S)(OC)Oc1ccc(cc1)N(=O)=O                   | 1 | 0 |
| C[C@@H](N)CN                                    | 0 |   |
| Oc1ccc2c3ccccc3c4c(ccc5ccc1c2c45)[N+            | 1 |   |
| CC(C)Cn1cnc:                                    | 0 | 0 |
| CC(C)CC(NC(=O)COc1cc(Cl)c(Cl)cc1Cl)C(           | 0 |   |
| Nc1cc2c(cc1[N+](=O)[O-])[nH]c3ccccc2            | 1 |   |
| CC(=O)Nc1snc2ccccc12                            | 1 |   |
| OC(=O)Cc1ccccc1Cl                               | 0 |   |
| Oc1cc(Cl)cc(Cl)c1Cl                             | 0 | 1 |
| CC(C)(O)c1ccc(CNC(=O)c2cccnc2Oc3ccc4nonc4c3)cc1 |   | 0 |
| c1ccc2c3c(ccc2c1)c4cccc5cccc3c45                | 1 |   |
| CC(=C)[C@@H]1CC=C(C)[C@@H](O)C1                 | 0 |   |
| CCOc1cccc(c1)N(=O)=O                            | 0 |   |
| CC(Cl)C(Br)CBr                                  | 1 |   |
| CC1(C)[C@@                                      | 0 | 0 |
| N\C=C/C#N                                       | 0 | 0 |
| CCCCC\C=C\C(=O)OC                               |   | 0 |
| OCC(O)C(O)C(O)C(O)C1SCC(N1N=O)C(=               | 0 |   |
| C1CCOC1                                         | 0 | 0 |
| CCN1CCOCC1                                      | 1 | 0 |
| CCNc1nc(Cl)nc(NC(C)(C)C#N)n1                    |   | 0 |
| CCC(C)(C)c1cc(N2Nc3ccccc3N2)c(O)c(c1            | 0 |   |
| COc1cc(N[S+](=O)(C)[O-])                        | 0 |   |
| OC(=O)COCCN1CCN(CC1)C                           |   | 0 |
| Oc1c(Br)cc(cc1Br)C#N                            | 0 |   |
| c1cc2cccc3c4cccc5cccc(c(c1)c23)c45              | 1 |   |
| OC(=O)c1ccc                                     | 0 | 0 |
| Cc1cc(O)c(Cl)c(C)c1Cl                           |   | 1 |
| Clc1ccc(\C=C\C(=O)C2=[S]                        | 0 |   |
| Nc1cc(cc(c1O)S(=O)(=O)O)N(=O)=O                 | 0 |   |
| NC(CCC(=O)Nc1ccc(cc1)N(=O)=O)C(=O)              | 0 |   |
| N[C@@H](C                                       | 0 | 0 |
| CC(C)(C)c1cc(O)c(cc1O)C(                        | 0 | 1 |
| C1=Cc2c3ccccc3cc4cccc1c24                       | 1 |   |
| CC[C@H](O)CN                                    | 0 |   |
| Cc1ccc(cc1)S                                    | 0 |   |
| CCCCCCCCCOC(=O)c1ccccc1C(=O)OCCCCCCCC           |   | 0 |
| CO[C@H]1C[C@H](C)CC2=                           | 0 |   |
| CC[N+](O-)(CC)CCn1nc2c3ccc(Cl)cc3Sc             | 1 |   |
| CC(C)C(C)\C=                                    | 0 | 0 |
| CC(C)COC(=O                                     | 0 | 0 |
| Nc1cc(c(N)cc1F)[N+](=O)[O-]                     | 1 |   |

|                                               |   |   |   |   |
|-----------------------------------------------|---|---|---|---|
| Nc1ccc(O)c(c                                  | 0 | 0 | 0 | 0 |
| [O-][N+](=O)c1ccc2[nH]c3ccccc3c2c1            |   |   | 1 |   |
| COc1cc(O)c2C(=O)c3c(OC)cc4OC5OCCC!            |   |   | 0 |   |
| Clc1cccn1                                     |   |   | 1 | 0 |
| Nc1ccc2ccccc2c1S(=O)(=O)O                     |   |   | 1 | 0 |
| CCOC(=O)C1:                                   | 1 | 0 |   |   |
| CN(C)[C@H]:                                   | 0 | 0 |   |   |
| CC(C[N+](C)(                                  | 0 | 0 |   | 0 |
| CCCCC(CC)CNCC(CC)CCCC                         |   |   | 0 | 0 |
| OCc1oc(cc1)c2[nH]ccc3c4ccccc4nc23             |   |   | 1 |   |
| CCCCCCCCCCCC(=O)N1CC                          |   | 1 |   |   |
| CC1(C)C2CCC(C2)C1=C                           |   |   | 0 | 0 |
| CC(C)COC(=O)OCN1C(=O)(                        |   | 0 |   | 0 |
| C[C@H]1C[C(                                   | 0 | 0 |   | 0 |
| ClCN1C(=O)c2ccccc2C1=O                        |   |   | 1 | 0 |
| O=N(=O)c1cc(c(Nc2c(cc2N(=O)=O)=O)N            |   |   | 1 |   |
| Cc1ccc(c(c1)N(=O)=O)N(=O)=O                   |   |   | 1 |   |
| FC1=CNC(=O                                    | 0 |   |   | 0 |
| NC(CN=N#N)C(=O)O                              |   |   | 1 |   |
| Cc1ccc(cc1)S(=O)(=O)NC2CCCCC2                 |   |   | 0 | 1 |
| CC(CO)c1ccccc1                                |   |   |   | 0 |
| CC(=O)CCc1ccccc1                              |   |   |   | 0 |
| C[C@H](N)C(                                   | 0 | 0 |   | 0 |
| C[C@H]1CCC                                    | 0 | 0 |   | 1 |
| OS(=O)(=O)C1=CC(=O)C(=O)c2ccccc12             |   |   | 1 |   |
| ClCc1c2ccccc2c(Cl)c3ccccc13                   |   |   | 1 |   |
| CC(C)[C@H](SC(=O)C)C(=O)N[C@H]1Cc2ccccc2[C@H] |   |   |   | 0 |
| Clc1ccc(cc1)S(=O)(=O)c2cc(Cl)c(Cl)cc2Cl       |   |   | 0 | 1 |
| CCCCCCC(C)OC(=O)COc1nc(F)c(Cl)c(N)c1Cl        |   |   |   | 1 |
| C[C@H](N[C@H](CCc1ccccc1)C(=O)O)C(=O)N2CCC[C( |   |   |   | 0 |
| COc1ccc(CC=C)cc1OC                            |   |   | 0 | 0 |
| Nc1c(F)cc(cc1F)c2cc(F)c(N)c(F)c2              |   |   | 1 |   |
| CNCCc1c[nH]cn1                                |   | 0 |   |   |
| C[C@@H]1[(                                    | 0 | 0 |   |   |
| c1ccc2cc3c(cc2c1)c4cccc5cccc3c45              |   |   | 1 |   |
| OC[C@H]1O                                     | 0 | 0 |   |   |
| CN1N(C(=O)(                                   | 0 | 0 | 0 | 0 |
| CC1=C(C=C(C                                   | 0 | 0 |   | 0 |
| CC(C)CC(NP(=                                  | 0 | 0 |   |   |
| O=N(=O)c1ccc2C=CCc2c1                         |   |   | 1 |   |
| NCCCC[C@H](N)C(=O)O                           |   |   |   | 0 |
| C[C@@H]1CN[C@@H]2[C@@H](C1)O[C@@]3(CC[C@      |   |   |   | 0 |
| CN(C)[C@H]1[C@@H]2[C@@H]3Cc4c(ccc(O)c4C(=     |   |   |   | 0 |

|                                                    |   |   |   |   |
|----------------------------------------------------|---|---|---|---|
| COC(=O)[C@                                         | 0 | 0 |   |   |
| Cn1c(N=N#N)nc2ccc3ccccc3c12                        |   |   | 1 |   |
| COc1ccc2[C@                                        | 0 | 0 |   | 0 |
| COC1C(CC2CN3CCc4c([nH]                             |   | 1 | 0 |   |
| ClP(Cl)c1ccccc1                                    |   |   |   | 0 |
| Nc1cccc2nc3ccccc3nc12                              |   |   | 1 |   |
| COc1cc2CCN(C)Cc3c(CC(=C                            |   | 0 |   |   |
| CC1=CC(=O)C(=CC1=O)C                               |   |   | 0 |   |
| Cn1c(nc2ccccc12)c3nc(cs3                           |   | 0 |   |   |
| CC(C)C1=NC(=O)C=C(C)N1                             |   |   |   | 0 |
| CCOC(=O)c1[nH]c2ccccc2c1\N=C\c3cc(C                |   |   | 1 |   |
| OCC1OC(C(O)C1O)n2cnc3c(S)ncnc23                    |   |   | 1 |   |
| Cn1ccnc1                                           | 0 | 0 |   |   |
| OC1C2OC2c3c(ccc4cc5c(ccc6ccccc56)nc                |   |   | 1 |   |
| O=NN1CCC=CC1                                       |   |   | 1 |   |
| CC(C)N(C(C)C)C(=O)SC\C(=C\Cl)\Cl                   |   |   | 1 |   |
| O[C@H](C=C)c1ccc2OCoc2c1                           |   |   | 0 |   |
| SCCSCCS                                            |   |   |   | 0 |
| [O-][N+](=O)c1cc(c(Nc2c(cc(cc2[N+])(=C             |   |   | 1 |   |
| Cc1nc2ccc(Cl)cc2[s+](=O)(                          |   | 0 |   |   |
| N[C@H](Cc1                                         | 0 | 0 | 0 | 0 |
| NS(=O)(=O)c                                        | 0 |   |   |   |
| COc1cc2C[C@@H]3N(C)C                               |   | 0 |   |   |
| COc1c2ccoc2nc3c(OC)c4OCoc4cc13                     |   |   | 1 |   |
| Oc1ccc(C=C(                                        | 0 | 0 |   | 1 |
| OC1O[C@H]2[C@@H](O)[C@H](OC2=O)[C@@H]1O            |   |   |   | 0 |
| CC1(C)S[C@H                                        | 0 | 0 |   |   |
| CC(C)(CO)C(C                                       | 0 | 0 |   |   |
| CC(C)CCC(=O)O[C@H]1CC[C@H]2[C@@H]3CCC4=CC(         |   |   |   | 0 |
| CCCCN(N=O)C(=N)NN(O)O                              |   |   | 1 |   |
| CC(Cl)Cl                                           |   |   | 0 | 0 |
| O=n1cccc2ccccc12                                   |   |   | 0 |   |
| NS(=O)(=O)c                                        | 0 |   | 0 | 0 |
| Nc1nc2ccc(OC(F)(F)F)cc2s                           |   | 0 |   | 0 |
| COC(=O)c1sccc1S(=O)(=O)NC(=O)Nc2nc(C)nc(OC)n2      |   |   |   | 0 |
| NC(=O)CBr                                          |   |   | 0 |   |
| CCCC=O                                             |   |   | 0 | 0 |
| Cc1c(N)cc(cc1N(=O)=O)N(=O)=O                       |   |   | 1 |   |
| OC(C(=O)O)c                                        | 0 | 0 |   |   |
| CC(C)(c1cc(Br)c(OCC(Br)CBr)c(Br)c1)c2cc(Br)c(OCC(B |   |   |   | 0 |
| CCCC\C=C\C=O                                       |   |   | 1 |   |
| ClCCC(Br)CBr                                       |   |   | 0 |   |
| CCOc1ccc(cc1)C(C)(C)COCc2cccc(Oc3ccccc3)c2         |   |   |   | 0 |

|                                                             |   |   |   |
|-------------------------------------------------------------|---|---|---|
| O=C(OC1CN2                                                  | 0 | 0 | 0 |
| CCCC[C@@H](CC)COC(=O)c1ccc(N(C)C)C                          | 1 |   |   |
| CC(C)CC[C@@H](C)Nc1ccc(N[C@H](C)C                           | 0 |   |   |
| COc1cc(O)c2C(=O)c3cc(O)ccc3Oc2c1                            | 1 |   |   |
| CCOC(=O)[C@H](O)C                                           | 0 | 0 | 0 |
| [O-][N+](=O)c1cccc2c1cc(c3cccc(c23)[N                       | 1 |   |   |
| [O-][N+](=O)c1cccc(Br)c1                                    | 1 |   |   |
| ClC1C[C@H]2[C@@H]([C@H]1Cl)[C@]3(Cl)C(=C(Cl)C               | 1 |   |   |
| Cc1ccc2cc3ccc4cccc5ccc(c2c1)c3c45                           | 1 |   |   |
| Nc1ncnc2c1ncn2Cc3cccc3                                      | 1 |   |   |
| Cn1c(C(=O)Nc2ccccn2)c(O                                     | 0 |   |   |
| lc1cncc(OC[C@@H]2CCN2                                       | 0 |   |   |
| O=C(OCc1cccc1)C(=O)OCc2cccc2                                | 0 |   |   |
| OC[C@H]1O[C@H]([C@H]                                        | 0 |   |   |
| Nc1ccc2cc(cc(O)c2c1N=Nc3cccc3C(F)(F)F)S(=O)(=O              | 0 |   |   |
| Fc1cnc2cccc(F)c2c1                                          | 0 |   |   |
| Cc1c(cccc1[N+](=O)[O-])C(=O)O                               | 1 |   |   |
| O[C@H]1CC[                                                  | 0 | 0 |   |
| CCCC1OC2CC3C4CCC5=CC(=O)C=CC5(C4C(CC3(C2(O1)C(=O)CO)C)O)    | 0 |   |   |
| C1CCC(C(C1)N)N.C(=O)(C(=O)[O-])[O-]                         | 1 |   |   |
| Cc1ncc(n1CCO)N(=O)=O                                        | 0 |   |   |
| C1CCC(CC1)C(CC2CCCN2)C3CCCCC3                               | 1 |   |   |
| CCCCCCCC=CCCCCCCC(=O)O.C(CO)N                               | 0 |   |   |
| CCCCCN(C)CCC(O)(P(=O)(O)O)P(=O)(O)O                         | 0 |   |   |
| Cc1c(C)c2OC(C)(COc3ccc(Cc4sc(O)nc4O)cc3)CCc2c(C)c1O         | 1 |   |   |
| Nc1ccc(C(O)=O)c(O)c1                                        | 1 |   |   |
| CC(CCC1cccc1)NCC(O)c2ccc(O)c(c2)C(N)=O                      | 1 |   |   |
| CC(C)C1=C(C(=CC=C1)C(C)C)OCOP(=O)([O-])[O-]                 | 0 |   |   |
| CC1=CC2=C(C=C1CC(=O)C3=C(C=CS3)S(=O)(=O)NC4=C(C(=NO4)C)C    | 1 |   |   |
| CCC(C1=CC(=CC=C1)O)C(C)CN(C)C                               | 0 |   |   |
| CC1=C(C=C(C=C1)NC2=NC=CC(=N2)N(C)C3=CC4=NN(C(=C4C=C3)C)C    | 1 |   |   |
| Cc1ccc(C)c(OCCCC(C)(C)C(O)=O)c1                             | 1 |   |   |
| C1=CC=C(C=C1)CN2C3=CC=CC=C3C(=N2)OCC(=O)O                   | 1 |   |   |
| Cc1cc(no1)C(=O)NNCc2cccc2                                   | 1 |   |   |
| C[C@](N)(Cc1ccc(O)cc1)C(O)=O                                | 0 |   |   |
| CC1=C(C(=O)C2=CC=CC=C2C1=O)CC=C(C)CCCC(C)CCCC(C)CCCC(C)C    | 0 |   |   |
| C(CC(=O)[O-])CO                                             | 0 |   |   |
| CCCCN(CCCC)CCCOc1ccc(cc1)C(=O)c1c(CCCC)oc2ccc(NS(C)(=O)=O)c | 1 |   |   |
| CC[C[N+](C)(C)C)OC(N)=O                                     | 0 |   |   |
| OC(=O)Cc1csc(n1)-c2ccc(Cl)cc2                               | 1 |   |   |
| C1=CC(=C2NC(=C3C=CC=CC3=O)N(N2)C4=CC=C(C=C4)C(=O)O)C(=O     | 1 |   |   |
| CC1C=CC=CCCC=CC=CC=CC=CC(CC(C)C(CC(=O)CC(C)CCC(CC(CC(CC(=O  | 0 |   |   |
| NC(=O)OCC(COC(N)=O)c1cccc1                                  | 1 |   |   |

|                                                              |   |
|--------------------------------------------------------------|---|
| CC(C(=O)NC(C)C(=O)NC1C2C1CN(C2)C3=C(C=C4C(=O)C(=CN(C4=N3     | 1 |
| C1CN(CCC1C(=O)N)CCCN2C3=CC=CC=C3SC4=C2C=C(C=C4)Cl            | 1 |
| CC1=C(SC=[N+])1CC2=CN=C(N=C2N)C)CCO                          | 0 |
| CC(\C=C\C1=C(C)CCCC1(C)C)=C/C=C/C(C)=C\C(O)=O                | 1 |
| Cn1cc[nH]c1=S                                                | 1 |
| CCC(C)C1C(=O)NC(C(=O)NC(C(=O)NC(C(=O)NC(C(=O)NCCCC(C(=O      | 0 |
| CC1C(C(C(O1)OC2C(OC(CC2O)OC3C(OC(CC3O)OC4CCC5(C(C4)CCC       | 0 |
| Cn1c2nc[nH]c2c(=O)n(C)c1=O                                   | 0 |
| [H][C@@]1(CC[C@@]2([H])[C@]3([H])[C@H](O)C[C@]4([H])C[C@     | 1 |
| C(CNCCNCCN)N                                                 | 0 |
| C1CC(CCC1OP(=O)([O-])OCC(CN(CCN(CC(=O)[O-])CC(=O)[O-])CC(=   | 0 |
| OC(=O)c1cn(C2CC2)c3cc(N4CCNCC4)c(F)cc3c1=O                   | 1 |
| CC1(C(NC(S1)C(C(=O)NCCCCC(=O)O)NC(=O)CC2=CC=CC=C2)C(=O)      | 0 |
| CN1CCN(Cc2ccc(cc2)C(=O)Nc3ccc(C)c(Nc4nccc(n4)-c5cccnc5)c3)CC | 1 |
| C[Si]12OCCN(CC(O1)COCC=C)CC(O2)COCC=C                        | 0 |
| CC1C(C(C(C(O1)OC2C(OC(C(C2O)O)OC3C(OC(C(C3O)O)O)CO)CO)O)     | 1 |
| CCC(C)C(C(=O)NC(CCC(=O)N)C(=O)NC(CC(C)C)C(=O)NC(CCSC)C(=O)   | 0 |
| COCCNC(=O)CN(CCN(CCN(CC(=O)NCCOC)CC(=O)[O-])CC(=O)[O-])C     | 0 |
| CCOC(=O)N1CCC(CC1)=C2c3ccc(Cl)cc3CCc4cccnc24                 | 0 |
| Fc1c[nH]c(=O)[nH]c1=O                                        | 0 |
| Cc1cc2nc3c(nc(=O)[nH]c3=O)n(CC(O)C(O)C(O)CO)c2cc1C           | 0 |
| C(CC(C(=O)O)N)CN=C(N)N                                       | 0 |
| CC=C1C(=O)NC(C(=O)OC2CC(=O)NC(C(=O)NC(CSSCCC=C2)C(=O)N1      | 0 |
| CCOC1C(CC(=O)O1)NC(=O)C2CCCN3N2C(=O)C(CCC3=O)NC(=O)C4=       | 1 |
| NCC1CCC(CC1)C(O)=O                                           | 0 |
| O=N[Fe--](C#N)(C#N)(C#N)(C#N)C#N                             | 0 |
| CCOC(C(=O)C1=CC=C(C=C1)C2=CC=CC=C2)NC3=CC=C(C=C3)C(=O)O      | 1 |
| CC(C)C(=O)OC1=C(C=C(C=C1)CO)C(CCN(C(C)C)C(C)C)C2=CC=CC=C2.   | 0 |
| Nc1ncnc2n(cnc12)[C@@H]3O[C@H](CO)[C@@H](O)[C@H]3O            | 0 |
| CC12CCC3C(C1CCC2(C)O)CCC4C3(COC(=O)C4)C                      | 1 |
| CC(C)COc1ccc(cc1C#N)-c1nc(C)c(s1)C(O)=O                      | 1 |
| Cc1ncc2CN=C(c3ccccc3F)c4cc(Cl)ccc4-n12                       | 0 |
| CC(CC1=CC=CC=C1)N                                            | 0 |
| CCNC(=NCCCC(C(=O)NC(CC(C)C)C(=O)NC(CCCCN=C(NCC)NCC)C(=C      | 0 |
| C1=CC(=C(C=C1)CC(=O)O)N)C(=O)C2=CC=C(C=C2)Br                 | 1 |
| C1CC(C1)CN2CCC34C5C(CCC3(C2CC6=C4C(=C(C=C6)O)O5)O)O          | 0 |
| CC1=C(C2=CC3=NC(=CC4=NC(=CC5=C(C(=C(N5)C=C1N2)C(C)OC(C)C     | 0 |
| CC(C)(CC1=CC=CC=C1)N                                         | 0 |
| Cc1cc2c(cc1C(=C)c3ccc(cc3)C(O)=O)C(C)(C)CCC2(C)C             | 1 |
| Cn1cnc2n(C)c(=O)n(C)c(=O)c12                                 | 0 |
| CCC1=C(C2=CC=CC=C2O1)C(=O)C3=CC=C(C=C3)O                     | 1 |
| C[C@]12C[C@H](O)[C@H]3[C@@H](CCC4=CC(=O)CC[C@]34C)[C@        | 0 |
| CC(C1=CC=CC=C1)NN                                            | 1 |

|                                                               |   |
|---------------------------------------------------------------|---|
| CON=C(C1=CC=C(C=C1)C2=CC=C(O2)C3=CC=C(C=C3)C(=NOC)N)N         | 1 |
| CC(=O)OC1CC2CCC3C(C2(CC1[N+]4(CCCCC4)C)C)CCC5(C3CC(C5OC(=     | 0 |
| Clc1ccc-2c(c1)C(=NCc3nncn-23)c4cccc4                          | 0 |
| C1CC2C(=O)NC(CSSCCC(=O)NC(C(=O)NCC(=O)NC(C(=O)NC(C(=O)N       | 0 |
| C1=CC(=CC=C1SC(P(=O)(O)O)P(=O)(O)O)Cl                         | 0 |
| CC(C)(CO)N.CN1C2=C(C(=O)N(C1=O)C)NC(=N2)Br                    | 0 |
| C1C(C(C(C(C1N)OC2C(C(C(C(O2)CO)O)O)N)OC3C(C(C(O3)CO)OC4C(     | 0 |
| OC(=O)c1c(l)cc(l)c(NC(=O)CCCC(=O)Nc2c(l)cc(l)c(C(O)=O)c2l)c1l | 0 |
| COc1ccc2n(C(=O)c3ccc(Cl)cc3)c(C)c(CC(O)=O)c2c1                | 1 |
| CCC(C)C(C(=O)NC(CO)C(=O)NC(CC(C)C)C(=O)NC(CC(=O)O)C(=O)NC     | 0 |
| CN1CCC23CCCC2C1CC4=C3C=C(C=C4)O                               | 0 |
| CCC1=NN(C(=O)N1CCOC2=CC=CC=C2)CCCN3CCN(CC3)C4=CC(=CC=C        | 1 |
| CNC1CCC2=C(C1)C3=C(N2)C=CC(=C3)C(=O)N                         | 0 |
| CC(CC1=CC=CC=C1)N(C)CC2=CC=CC=C2                              | 0 |
| CN(CCOc1ccc(NS(C)(=O)=O)cc1)CCc2ccc(NS(C)(=O)=O)cc2           | 0 |
| CC(C(O)=O)c1cccc(Oc2cccc2)c1                                  | 1 |
| CC(=O)NC1=C(C(=C(C=C1)C(=O)O)I)C(=O)NCI                       | 0 |
| CCC1C(C(C(C(=O)C(CC(C(C(C(C(=O)O1)C)OC2CC(C(C(O2)C)O)(C)O     | 1 |
| CO[Si](C)(C)O[Si](C)(C)C                                      | 0 |
| CC(C1=CC(=C(C=C1)N2CC=CC2)Cl)C(=O)O                           | 1 |
| CC(C)(C)C#CC=CCN(C)CC1=CC=CC2=CC=CC=C21                       | 1 |
| CCC1C(=O)N(CC(=O)N(C(C(=O)NC(C(=O)N(C(C(=O)NC(C(=O)NC(C(=     | 1 |
| OC(=O)c1cc(nc2cccc12)-c3cccc3                                 | 1 |
| CC(C)CC(CC(=O)O)CN                                            | 0 |
| CC(=O)OC1CC2CCC3C(C2(CC1N4CCCC4)C)CCC5(C3CC(C5OC(=O)C)[       | 0 |
| OC(=O)c1cc(ccc1O)-c2ccc(F)cc2F                                | 1 |
| Nc1ccc(cc1)S(=O)(=O)NC(O)=N                                   | 1 |
| CCC(C)C1C(=O)NC(C(=O)NC(C(=O)NC(C(=O)NC(C(=O)NCC(=O)NC(C      | 0 |
| CS(=O)(=O)OCCCCOS(C)(=O)=O                                    | 1 |
| C1=CC=NC(=C1)NS(=O)(=O)C2=CC=C(C=C2)NN=C3C=CC(=O)C(=C3)(      | 1 |
| CCCC(C1(CCC2C(O1)CC(=O)C2CCCCC(=O)O)O)(F)F                    | 0 |
| CC\C(c1cccc1)=C(/c2cccc2)c3ccc(OCCN(C)C)cc3                   | 1 |
| Nc1nc2ncc(CNc3ccc(cc3)C(=O)N[C@@H](CCC(O)=O)C(O)=O)nc2c(      | 0 |
| CC1=CC(=CC=C1)CN2CCN(CC2)C(C3=CC=CC=C3)C4=CC=C(C=C4)Cl        | 0 |
| CN1CCC23C4C1CC5=C2C=C(C=C5)O)OC3C(C=C4)O                      | 0 |
| C1CC(N(C1)C(=O)C2CSSCC(C(=O)NC(C(=O)NC(C(=O)NC(C(=O)NC(C      | 0 |
| CC(=O)Oc1ccc(cc1)C(=C2CCCC2)c3ccc(OC(C)=O)cc3                 | 1 |
| CCC(C)C1C(=O)NC(C(=O)NCC(=O)NCC(=O)NC2CSSCC3C(=O)NC(C(=       | 0 |
| CC(C)C[C@@H](NC(=O)[C@@H](Cc1cccc1)NC(=O)c2cnccn2)B(O)I       | 1 |
| Oc1ccc(cc1)C1CNCCc2c(Cl)c(O)c(O)cc12                          | 0 |
| CN(CC(=O)O)C(=S)C1=CC=CC2=C1C=CC(=C2C(F)(F)F)OC               | 1 |
| Cn1cnc(c1Sc2ncnc3nc[nH]c23)N(=O)=O                            | 1 |
| C1=C(NC=N1)CCN                                                | 0 |

|                                                             |   |
|-------------------------------------------------------------|---|
| Cc1ccc(cc1)C(=C/CN2CCCC2)\c3cccn3                           | 0 |
| Clc1ccc(cc1)[C@H]2CC[C@H](CC2)C3C(=O)C(=O)c4ccccc4C3=O      | 1 |
| C1CCC(CC1)C(CCN2CCCC2)(C3=CC=CC=C3)O                        | 0 |
| OCC(O)COC(=O)c1ccccc1Nc2ccnc3cc(Cl)ccc23                    | 1 |
| C1=CC=C(C(=C1)C(C2=CC=C(C=C2)Cl)C(Cl)Cl)Cl                  | 0 |
| CC(C1=CC2=C(C=C1)OC(=N2)C3=CC=C(C=C3)Cl)C(=O)O              | 1 |
| Oc1cn(N=Cc2ccc(o2)N(=O)=O)c(=O)[nH]1                        | 1 |
| Cc1ccc(Nc2c(F)cccc2Cl)c(CC(O)=O)c1                          | 1 |
| CCCCCCCC[C@H](C[C@H]1OC(=O)[C@H]1CCCC)OC(=O)[               | 1 |
| CCCc1cc(=O)[nH]c(=S)[nH]1                                   | 1 |
| Cc1ccccc1C(=O)Nc1ccc(C(=O)N2CCCC(O)c3cc(Cl)ccc23)c(C)c1     | 1 |
| Oc1nc2cc(Cl)ccc2o1                                          | 1 |
| CC(C)(C1=CC=C(C=C1)C(CCCN2CCC(CC2)C(C3=CC=CC=C3)(C4=CC=CC   | 0 |
| CCC1C2(C(C(C(=O)C(CC(C(C(C(=O)C(C(=O)O1)C)C)OC3C(C(CC(O3)C) | 1 |
| CC(C)C(CC1=CC(=C(C=C1)OC)OCCOC)CC(C(C(C(C)C)C(=O)NCC(C)(    | 0 |
| CC1C2CC3=C(C1(CCN2CC=C(C)C)C)C=C(C=C3)O                     | 0 |
| CC(C)C(C(=O)NCC(=O)NC(CCCCN)C(=O)NC(CCCCN)C(=O)NC(CCCNC(    | 0 |
| CCCCS(=O)(=O)NC(CC1=CC=C(C=C1)OCCCC2CCNCC2)C(=O)O           | 0 |
| C(C(CO[N+](=O)[O-])O[N+](=O)[O-])O[N+](=O)[O-]              | 0 |
| Cn1c2ncn(CC(O)CO)c2c(=O)n(C)c1=O                            | 0 |
| Nc1ccn([C@H]2O[C@H](CO)[C@H](O)[C@H]2O)c(=O)n1              | 1 |
| CN1CCC23C4C1CC5=C2C(=C(C=C5)OC)OC3C(C=C4)O                  | 0 |
| CCCCOC1=CC=C(C=C1)C2=CC=C(C=C2)C3=CC=C(C=C3)C(=O)NC4CC(     | 1 |
| CCOC(=O)C1(CCN(CC1)C)C2=CC=CC=C2                            | 0 |
| Cl[Cu]Cl                                                    | 0 |
| NCCCC(O)(P(O)(O)=O)P(O)(O)=O                                | 0 |
| CC(=O)Nc1c(l)c(NC(C)=O)c(l)c(C(O)=O)c1                      | 0 |
| COc1cc2ncnc(Nc3ccc(F)c(Cl)c3)c2cc1OCCCN4CCOCC4              | 1 |
| CC1=CC(=C(C(=C1C=CC(=CC=CC(=O)O)C)C)C)OC                    | 1 |
| C1=CC(=C(C(=C1C(=O)C2=CC(=C(C(=C2)O)O)O)O)O                 | 1 |
| CC1=C(C=C(C=C1)N2C(=O)C(=C(N2)C)NN=C3C=CC=C(C3=O)C4=CC(=    | 1 |
| [O-][N+](=O)O[C@H]1CO[C@H]2[C@H](CO[C@H]12)O[N+]([(         | 0 |
| CN1[C@H]2CC[C@H]1C[C@H](C2)OC(=O)C(CO)c3ccccc3              | 0 |
| OC[C@H]1CC[C@H](O1)n2cnc3c2nc[nH]c3=O                       | 1 |
| Cn1c(CCCC(O)=O)nc2cc(ccc12)N(CCCl)CCC                       | 0 |
| C1CC[N+](2(C1)C3CCC2CC(C3)OC(=O)C(C4=CC=CC=C4)(C5=CC=CC=C   | 0 |
| CC1=CC2=C(C=C1C)N(C=N2)C3C(C(C(O3)CO)OP(=O)(O)OC(C)CNC(=    | 0 |
| CCCC(C)(COC(N)=O)COC(=O)NC(C)C                              | 0 |
| CC(=O)OC1(CCC2C1(CCC3C2CCC4=CC(=O)CCC34)C)C#C               | 0 |
| CCOc1ccccc1OCCN[C@H](C)Cc2ccc(OC)c(c2)S(N)(=O)=O            | 0 |
| COc1cc(OC)c(Cl)c2OC3(C(C)CC(=O)C=C3OC)C(=O)c12              | 1 |
| CC1C(OCCN1C)C2=CC=CC=C2                                     | 0 |
| CN(C)C1=CC(=C(C=C1)OC)CNC2CCCN2C3=CC=CC=C3                  | 0 |



|                                                              |   |
|--------------------------------------------------------------|---|
| CC(C)C(C)C=CC(C)C1CCC2C1(CCCC2=CC=C3CC(CCC3=C)O)C            | 0 |
| CCC(=O)N(C1=CC=CC=C1)C2(CCN(CC2)CCC3=CC=CS3)COC              | 0 |
| C1C(C(OC1N2C=NC3=C2NC=NCC3O)CO)O                             | 1 |
| CN1CCC23C4C(=O)CCC2(C1CC5=C3C(=C(C=C5)OC)O4)O                | 0 |
| [H]OC([H])([H])C(=O)[C@@]1(O[H])C([H])([H])C([H])([H])[C@@]2 | 0 |
| CCCN(CCC)C(=O)CC1=C(N=C2N1C=C(C=C2)Cl)C3=CC=C(C=C3)Cl        | 1 |
| OC(Cn1ccnc1)(P(O)(O)=O)P(O)(O)=O                             | 0 |
| Nc1nnc(c(N)n1)-c2cccc(Cl)c2Cl                                | 1 |
| C[N+]1(CCC23C4C(=O)CCC2(C1CC5=C3C(=C(C=C5)O)O4)O)CC6CC6      | 0 |
| CCNC(=O)N(CCCN(C)C)C(=O)C1CC2C(CC3=CN4=CC=CC2=C34)N(C1       | 0 |
| c1nc(cs1)-c2nc3cccc3[nH]2                                    | 1 |
| CCN(CC)CCNC(=O)c1c(C)[nH]c(\C=C2/C(=O)Nc3ccc(F)cc23)c1C      | 1 |
| CC(=O)Oc1cccc1C(O)=O                                         | 0 |
| CCC12CC(=C)C3C(C1CCC2(C#C)O)CCC4=CC(=O)CCC34                 | 1 |
| CNCC(C(C(C(CO)O)O)O)O.C(CN(CC(=O)O)CC(=O)[O-])N(CCN(CC(=O    | 0 |
| CC(C)c1cc(OC(C)=O)c(C)cc1OCCN(C)C                            | 1 |
| Cc1cn(C2CC(N=N#N)C(CO)O2)c(=O)[nH]c1=O                       | 1 |
| CC1=C(C(=O)N2CCCC(C2=N1)O)CCN3CCC(CC3)C4=NOC5=C4C=CC(=       | 0 |
| CCC(C)C(C(=O)NC(CO)C(=O)NC(CC(C)C)C(=O)NC(CC(=O)O)C(=O)NC    | 0 |
| CCCCN1C(=O)C(NC(=O)C12CCN(CC2)CC3=CC=C(C=C3)OC4=CC=C(C=      | 1 |
| CC(CC1=CC=CC=C1)NC                                           | 0 |
| CCCCN1CC(C(C(C1CO)O)O)O                                      | 0 |
| C1=NC2=C(N1C3C(C(C(O3)COP(=O)(O)O)O)O)N=C(N=C2N)F            | 0 |
| COC1C(CC2CN3CCC4=C(C3CC2C1C(=O)OC)NC5=C4C=CC(=C5)OC)OC       | 0 |
| C(C(F)(F)F)(C(F)(F)F)(F)F                                    | 0 |
| CCOC(=O)CNC(C1CCCC1)C(=O)N2CCC2C(=O)NCC3=CC=C(C=C3)C(=       | 1 |
| CC1C=CC=C(C(=O)NC2=C(C3=C(C(=C4C(=C3C(=O)C2=CN5CCN(CC5       | 1 |
| CN[C@H]1[C@H](O)[C@@H](O)[C@H](CO)O[C@H]1O[C@H]2[C@          | 0 |
| C1C2CC2N(C1C#N)C(=O)C(C34CC5CC(C3)CC(C5)(C4)O)N              | 0 |
| CC1=CC(=C(C=C1)O)C(CCN(C(C)C)C(C)C)C2=CC=CC=C2               | 0 |
| C[C@]12CC[C@H]3[C@@H](CCC4=Cc5oncc5C[C@]34C)[C@@H]1C         | 1 |
| CC1(C(=O)N2C(C(=O)N3CCCC3C2(O1)O)CC4=CC=CC=C4)NC(=O)C5C      | 0 |
| CC1CCN(C(C1)C(=O)O)C(=O)C(CCCN=C(N)N)NS(=O)(=O)C2=CC=CC3     | 0 |
| C1=NC2=C(N1)C(=S)N=CN2                                       | 1 |
| CC(C)(CO)C(C(=O)NCCCCO)O                                     | 0 |
| Cc1cn([C@@H]2O[C@H](CO)C=C2)c(=O)[nH]c1=O                    | 1 |
| CC(=O)Oc1ccc(cc1)C2(C(=O)Nc3cccc23)c4ccc(OC(C)=O)cc4         | 1 |
| CN(Cc1cnc2nc(N)nc(N)c2n1)c3ccc(cc3)C(=O)N[C@@H](CCC(O)=O)    | 1 |
| CC1C(C(C(O1)OC2C(C(C(OC2OC3=C4C=C5C=C3OC6=C(C=C(C=C6)C       | 0 |
| Nc1ccc(cc1)C(=O)NCC(O)=O                                     | 0 |
| CC(O)(P(O)(O)=O)P(O)(O)=O                                    | 0 |
| CC[C@H](C)[C@@H]1NC(=O)[C@H](Cc2ccc(O)cc2)NC(=O)[C@@H        | 0 |
| CCC(C)C(C(=O)NC(CC(C)C)C(=O)N1CCCC1C(=O)N2CCCC2C(=O)NC(C     | 0 |

|                                                                                                                                                                                                                                                                       |   |
|-----------------------------------------------------------------------------------------------------------------------------------------------------------------------------------------------------------------------------------------------------------------------|---|
| C=CCN.C1C(O1)CCI                                                                                                                                                                                                                                                      | 0 |
| CCOC(=O)c1cncn1C(C)c2ccccc2                                                                                                                                                                                                                                           | 0 |
| CC1=C(C2=C(N1CC(=O)O)C=C(C=C2)OC)C(=O)C3=CC=C(C=C3)Cl                                                                                                                                                                                                                 | 1 |
| CCc1cccc2c3CCOC(CC)(CC(O)=O)c3[nH]c12                                                                                                                                                                                                                                 | 1 |
| Nc1nc(O)c(o1)-c2ccccc2                                                                                                                                                                                                                                                | 1 |
| CCC(C)C1C(=O)NC(C(=O)NC(C(=O)NC(CSSCC(C(=O)NC(C(=O)N1)CC(C1C(N(C2=C(N1)NC(=NC2=O)N)C=O)CNC3=CC=C(C=C3)C(=O)NC(CF1ccc(cc1)C(=O)CCCN2CCC(=CC2)n3c4ccccc4[nH]c3=O                                                                                                        | 0 |
| C1=CC=C(C=C1)CC(CC(=O)CNC(=O)C2=CC=CC=C2)C(=O)O                                                                                                                                                                                                                       | 0 |
| CC(COC1=CC=CC=C1)NN                                                                                                                                                                                                                                                   | 1 |
| CN(C)[C@H]1[C@@H]2[C@@H]3Cc4c(ccc(O)c4C(=O)C3=C(O)[C@Cc1c(oc2c(cccc2c1=O)C(=O)OCCN3CCCC3)-c4ccccc4                                                                                                                                                                    | 0 |
| C[N+](C)C2CC(CC1C3OC23)OC(=O)C(CO)c4ccccc4                                                                                                                                                                                                                            | 0 |
| CC12CCC3C(C1CCC2O)CCC4=C3C=CC(=C4)OC(=O)N(CCCl)CCCl                                                                                                                                                                                                                   | 1 |
| CN1C2=C(C3=CC=CC=C3S1(=O)=O)OC(=O)N(C2=O)C4=CC=CC=N4                                                                                                                                                                                                                  | 1 |
| C1CC1NC2=NC(=NC3=C2N=CN3C4CC(C=C4)CO)N                                                                                                                                                                                                                                | 1 |
| CC(=O)OC1=CC2=C(S1)CCN(C2)C(C3=CC=CC=C3F)C(=O)C4CC4                                                                                                                                                                                                                   | 0 |
| COc1cccc2C(=O)c3c(O)c4C[C@](O)(C[C@H](O[C@H]5C[C@H](N)[C1=NC2=C(N1C3C(C(C(O3)CO)O)F)N=C(N=C2N)Cl                                                                                                                                                                      | 0 |
| CC1C=CC=C(C(=O)NC2=C(C3=C(C(=C4C(=C3C(=O)C2=CN5CCN(CC5CS(=O)(=O)CCNc1ccc(o1)-c2ccc3ncnc(Nc4ccc(OCc5cccc(F)c5)c(Cl)Nc1cc(nc(=N)n1O)N2CCCCC2                                                                                                                            | 1 |
| CCCCCCN(CC)CCCC(C1=CC=C(C=C1)NS(=O)(=O)C)O                                                                                                                                                                                                                            | 0 |
| CCCCCOC1=CC=C(C=C1)C2=CC(=NO2)C3=CC=C(C=C3)C(=O)NC4CC(CF1ccc(cc1)C(CCCN2CCC(CC2)n3c4ccccc4[nH]c3=O)c5ccc(F)cc5                                                                                                                                                        | 0 |
| CC1=CC(=C(C2=C1C=CC=N2)O)Br                                                                                                                                                                                                                                           | 1 |
| C1C(N(C2=C(N1)N=C(NC2=O)N)C=O)CNC3=CC=C(C=C3)C(=O)NC(CCC(C)CC(C)CCCCCCCC(=O)NC1CC(C(NC(=O)C2C(CCN2C(=O)C(NC(=C=C1C(CC(C1CO)O)N2C=NC3=C2NC(=NC3=O)N                                                                                                                    | 1 |
| CCCC(=O)OCOC(=O)C1=C(NC(=C(C1C2=C(C(=CC=C2)Cl)Cl)C(=O)OC)(CCN(CC)C(=O)C(\C#N)=C\c1cc(O)c(O)c(c1)N(=O)=O                                                                                                                                                               | 0 |
| CC(N(O)C(N)=O)c1cc2ccccc2s1                                                                                                                                                                                                                                           | 1 |
| COc1ccc(cc1)[C@@H]2Sc3ccccc3N(CCN(C)C)C(=O)[C@@H]2OC(C)CCC(C)CCCC(=O)NC(CCNCS(=O)(=O)[O-])C(=O)NC(C(C)O)C(=O)NCSSCC[C@H](NC(=O)[C@H](Cc1ccc(OS(O)(=O)=O)cc1)NC(=O)[C@@CCCC1(CC(=O)C(=C(O1)O)C(CC)C2=CC(=CC=C2)NS(=O)(=O)C3=NC(=CN(C)CCCC1C2=CC=CC=C2NC3=C1C=C(C=C3)Cl | 1 |
| C1CC2=CC=CC=C2C(C3=CC=CC=C31)[NH2+]CCCCCCC(=O)O                                                                                                                                                                                                                       | 1 |
| CC[C@H]([C@H](C)O)n1ncn(-c2ccc(cc2)N2CCN(CC2)c2ccc(OCC3NCCCNCCSP(O)(O)=O                                                                                                                                                                                              | 0 |
| CC1=NC(=CN1C2=CC=C(C=C2)[N+](=O)[O-])[N+](=O)[O-]                                                                                                                                                                                                                     | 1 |
| CC1(C)S[C@@H]2[C@H](NC(=O)COc3ccccc3)C(=O)N2[C@H]1C(O):C1=CN(C(=O)N=C1N)C2C(C(C(O2)CO)O)(F)F                                                                                                                                                                          | 0 |
|                                                                                                                                                                                                                                                                       | 1 |

|                                                                                                                                                                                                               |   |
|---------------------------------------------------------------------------------------------------------------------------------------------------------------------------------------------------------------|---|
| CN(C)CC=C(C1=CC=C(C=C1)Br)C2=CN=CC=C2                                                                                                                                                                         | 1 |
| CCCC(CCC)C(=O)O.CCCC(CCC)C(=O)[O-]                                                                                                                                                                            | 1 |
| CC(C)(C)NCC(=O)NC1=C(C2=C(CC3CC4C(C=O)C(=C(C4(C=O)C3=C2)C=CC1=CC=CC=C1S(=O)(=O)[O-])                                                                                                                          | 1 |
| OCC(NC(=O)C(Cl)Cl)C(O)c1ccc(cc1)N(=O)=O                                                                                                                                                                       | 0 |
| C1C(=S)N(C2=C(C=C(C=C2)Cl)C(=N1)C3=CC=CC=C3F)CC(F)(F)F                                                                                                                                                        | 0 |
| CC(C(C1CNC2=C(N1)C(=O)N=C(N2)N)O)O                                                                                                                                                                            | 0 |
| CC(C)NC1=NC=CC=N1                                                                                                                                                                                             | 1 |
| CN(C)CC1=CC=C(O1)CSCCNC(=C[N+](=O)[O-])NCC2=CC3=C(C=C2)O                                                                                                                                                      | 1 |
| C1C(=O)NC(=O)N1N=CC2=CC=C(O2)C3=CC=C(C=C3)[N+](=O)[O-]                                                                                                                                                        | 1 |
| C[N+](C)(C)CC([O-])=O                                                                                                                                                                                         | 0 |
| CC(C)(C)NC(=O)C1CN(CCN1CC(CC(C2=CC=CC=C2)C(=O)NC3C(CC4=CC(C)COC(=O)NCCC(=O)NC(CC1=CNC2=CC=CC=C21)C(=O)NC(CCSC)CC(C)c1nnc(C)n1[C@H]1C[C@@H]2CC[C@H](C1)N2CC[C@H](NC(=C1CCN(CC1)CCC(C2CC3CC2C=C3)(C4=CC=CC=C4)O | 1 |
| CCC(=O)NCCC1CCC2=C1C3=C(C=C2)OCC3                                                                                                                                                                             | 0 |
| C1CN(CC2=C1SC=C2)CC3=CC=CC=C3Cl                                                                                                                                                                               | 1 |
| CN1C2CCC1CC(C2)OC(C3=CC=CC=C3)C4=CC=CC=C4                                                                                                                                                                     | 0 |
| CCCCCCC(C)(C)C1=CC2=C(C3CC(=O)CCC3C(O2)(C)C)C(=C1)O                                                                                                                                                           | 0 |
| CC(=O)Oc1ccc(cc1)C(c2ccc(OC(C)=O)cc2)c3cccn3                                                                                                                                                                  | 0 |
| CCN(C(C)=O)c1cccc(c1)-c2ccnc3c(cnn23)C#N                                                                                                                                                                      | 0 |
| CC[C@@]1(O)C(=O)OCc2c1cc3-c4nc5ccc(O)c(CN(C)C)c5cc4Cn3c2=COc1cccc1Oc2c(NS(=O)(=O)c3ccc(cc3)C(C)(C)C)nc(nc2OCCO)-c4n                                                                                           | 1 |
| CC(=O)Nc1nnc(s1)S(N)(=O)=O                                                                                                                                                                                    | 1 |
| CC1=CC(=CC(=C1OC2=NC(=NC(=C2Br)N)NC3=CC=C(C=C3)C#N)C)C#N                                                                                                                                                      | 1 |
| CC(C)C1NC(=O)C(NC(=O)c2ccc(C)c3oc4c(C)c(=O)c(N)c(C(=O)NC5C(NCCCCC(O)=O                                                                                                                                        | 1 |
| CCCCC(C)(C=CC1C(CC(C1CC=CCCC(=O)O)O)O)O                                                                                                                                                                       | 0 |
| CC12CCC3C(C1CCC2C(=O)NC4=C(C=CC(=C4)C(F)(F)F)C(F)(F)F)CCC5(CCCC(C)(COC(N)=O)COC(N)=O                                                                                                                          | 0 |
| CCC(C)N1C(=O)N(C=N1)C2=CC=C(C=C2)N3CCN(CC3)C4=CC=C(C=C4)CC12CCC3C(CCC4=CC(=O)CCC34C)C1CCC2O                                                                                                                   | 1 |
| CC(C(=O)[O-])O                                                                                                                                                                                                | 0 |
| C1=CC(=CC=C1S(=O)(=O)NC=NCCSCC2=CSC(=N2)N=C(N)N)Br                                                                                                                                                            | 1 |
| CN1CCC23C4C(=O)CCC2(C1CC5=C3C(=C(C=C5)O)O4)O                                                                                                                                                                  | 0 |
| C(C(S)S)O                                                                                                                                                                                                     | 0 |
| CN(C)C(=N)NC(N)=N                                                                                                                                                                                             | 0 |
| CC(C)(C)NCC(COC1=CC=CC=C1C2CCCC2)O                                                                                                                                                                            | 0 |
| Oc1ccc(cc1)-c2sc3cc(O)ccc3c2C(=O)c4ccc(OCCN5CCCCC5)cc4                                                                                                                                                        | 0 |
| N[S+](([O-])(=O)c1cc(Cl)c(Cl)c(c1)[S+](N)([O-])=O                                                                                                                                                             | 0 |
| CN(C)CCC(C1=CC=C(C=C1)Br)C2=CC=CC=N2                                                                                                                                                                          | 0 |
| CC(C(=NO)C)NCC(C)(C)CNC(C)C(=NO)C                                                                                                                                                                             | 0 |
| CCCCOCC(CN1C(=O)C(C(=O)NC1=O)(CC)C2=CC=CC=C2)OC(=O)N.CC                                                                                                                                                       | 1 |

|                                                            |   |
|------------------------------------------------------------|---|
| C1CCC2(C3CC4=C(C2(C1)CCN3CC5CCC5)C=C(C=C4)O)O              | 0 |
| CC(C)Cc1ccc(CC(O)=O)cc1                                    | 1 |
| CC(CN1CCN(CCN(CCN(CCC1)CC(=O)[O-])CC(=O)[O-])CC(=O)[O-])O  | 0 |
| C(N1CCCNCCNCCCNC1)c2ccc(CN3CCCNCCNCCC3)cc2                 | 0 |
| CC(C)CC(C(=O)NC(C(C)C)C(=O)O)NC(=O)CNC(=O)C(CCC(=O)N)NC(=  | 0 |
| C1=CC=C(C=C1)C2(C(=O)N(C(=O)N2)COP(=O)(O)O)C3=CC=CC=C3     | 1 |
| C1C(C(C(C(C1N)OC2C(C(C(C(O2)CN)O)O)N)OC3C(C(C(O3)CO)OC4C(  | 0 |
| CCC(C)C(C(=O)N1CCCC1C(=O)NC(CCC(=O)O)C(=O)NC(CCC(=O)O)C(-  | 0 |
| CN(C)CCC(C1=CC=C(C=C1)Cl)C2=CC=CC=N2                       | 0 |
| OC[C@H]1O[C@](O)(CO)[C@@H](O)[C@@H]1O[C@@H]2O[C@H          | 0 |
| CCC(C)C(C(=O)NC(CCC(=O)O)C(=O)NC(CCC1=CNC2=CC=CC=C21)C(=C  | 0 |
| CC[C@]1(O)C[C@@H]2CN(C1)CCc3c([nH]c4cccc34)[C@@](C2)(C(    | 0 |
| [H][C@@]12CC[C@@](O)(C#C)[C@@]1(CC)CC[C@]3([H])[C@@]4      | 0 |
| CC1(O)CCC2C3CCC4=CC(=O)CCC4(C)C3(F)C(O)CC12C               | 1 |
| CCC(=O)N(C1=CC=CC=C1)C2(CCN(CC2)CCN3C(=O)N(N=N3)CC)COC     | 0 |
| CN(C)CCc1c[nH]c2ccc(C[S+](O-))=O)N3CCCC3)cc12              | 0 |
| C[C@H]1COc2c(N3CCN(C)CC3)c(F)cc4c2n1cc(C(O)=O)c4=O         | 1 |
| CC1=C(C2=C(C1=CC3=CC=C(C=C3)S(=O)C)C=CC(=C2)F)CC(=O)O      | 1 |
| CC1(CC(=O)N(C1=O)C)C2=CC=CC=C2                             | 0 |
| CSCC[C@H](N)C(O)=O                                         | 0 |
| C[N+](C)(C)CC(CC(=O)[O-])O                                 | 0 |
| C1=C(C(=O)NC(=O)N1C2C(C(C(O2)CO)O)F)I                      | 1 |
| OC(=O)CN(CCN(CC(O)=O)CC(O)=O)CCN(CC(O)=O)CC(O)=O           | 0 |
| CC(=O)N1C2=CC=CC=C2C(C1=O)(C3=CC=C(C=C3)OC(=O)C)C4=CC=C(   | 1 |
| CC(=O)NC1C(C(C(OC1O)CO)OS(=O)(=O)[O-])OC2C(C(C(C(O2)C(=O)  | 1 |
| CNCC(C1=CC=C(C=C1)O)O                                      | 0 |
| CC1=C2CCC(=O)N(C2=NC(=N1)C)CC3=CC=C(C=C3)C4=CC=CC=C4C5=    | 1 |
| CC(COC1=CC=CC=C1)NC(C)C(C2=CC=C(C=C2)O)O                   | 0 |
| OS(=O)(=O)OC[C@H]1O[C@@H](O[C@]2(COS(O)(=O)=O)O[C@H]       | 0 |
| CC1=C(C=C(C=C1)C(=O)NC2=CC(=CC(=C2)N3C=C(N=C3)C)C(F)(F)F)N | 1 |
| CC(C1=CC=CC2=CC=CC=C21)NCCCC3=CC(=CC=C3)C(F)(F)F           | 0 |
| C(C(C(C(C(CO)O)O)O)O)O                                     | 0 |
| C(C(C1C=C(C(=O)O1)O)O)O                                    | 0 |
| CCOC(=O)c1ncn-2c1CN(C)C(=O)c3cc(F)ccc-23                   | 0 |
| Cc1ccc(cc1)C(=O)c2cc(O)c(O)c(c2)[N+](O-)=O                 | 1 |
| CNC(=O)C1=CN(N=C1)C2=NC3=C(C(=N2)N)N=CN3C4C(C(C(O4)CO)(    | 0 |
| N[C@@H](Cc1cc(I)c(Oc2ccc(O)c(I)c2)c(I)c1)C(O)=O            | 0 |
| [H][C@]1(CO[C@@]2([H])OCC[C@@]12[H])OC(=O)N[C@@H](Cc3      | 1 |
| CN1CCN(CC1)C(c2ccccc2)c3ccc(Cl)cc3                         | 0 |
| CC(CCCC(C)(C)O)C1CCC2C1(CCCC2=CC=C3CC(C(C3=C)O)O)C         | 0 |
| CC(C)NCC(COC1=CC=C(C=C1)CCC(=O)OC)O                        | 0 |
| CCC(CO)NC(=O)C1CN(C2CC3=CN(C4=CC=CC(=C34)C2=C1)C)C         | 0 |
| CN(C)N=Nc1nc[nH]c1C(N)=O                                   | 1 |

|                                                            |   |
|------------------------------------------------------------|---|
| CN1CCc2cccc-3c2[C@H]1Cc4ccc(O)c(O)c-34                     | 0 |
| Cc1cccc(Nc2cccc2C(O)=O)c1C                                 | 1 |
| O=c1[nH]cnc2[nH]ncc12                                      | 1 |
| CC1=NC2=C(N1)CCN(C3=CC=CC=C32)C(=O)C4=CC=C(C=C4)NC(=O)C    | 0 |
| COc1cccc2OC[C@H]3CN(CCCCn4c(=O)[nH]c5c6nc(cnc6sc5c4=O)-c7  | 1 |
| C1CN(CCN1CCOCCO)C(C2=CC=CC=C2)C3=CC=C(C=C3)Cl              | 0 |
| [H][C@]12CN3C4=C(C(=O)C(N)=C(C)C4=O)[C@@]([H])(COC(N)=O)   | 0 |
| CC(=O)N[C@@H](CS)C(O)=O                                    | 0 |
| C1C2C(C2N)CN1C3=C(C=C4C(=O)C(=CN(C4=N3)C5=C(C=C(C=C5)F)F   | 1 |
| CN1C(CNC2=C1C(=O)N=C(N2)N)CNC3=CC=C(C=C3)C(=O)NC(CCC(=C    | 0 |
| C[N+])1(CCC2=CC(=C(C=C2)C1CC3=CC(=C(C=C3)OC)OC)OC)OC)CCC(= | 0 |
| CC(=O)OCC(=O)C1(CCC2C1(CC(=O)C3C2CCC4=CC(=O)CCC34C)C)O     | 0 |
| CNCC(C(C(C(CO)O)O)O)O.C1=CC=C(C=C1)COCC(C(=O)[O-])N(CCN(C  | 0 |
| CCN(CC)C(C)C(=O)C1=CC=CC=C1                                | 0 |
| CC(C)c1c(C(=O)Nc2cccc2)c(c(-c3ccc(F)cc3)n1CC[C@@H](O)C[C@  | 1 |
| CC[C@@H](CO)NCCN[C@H](CC)CO                                | 1 |
| CC[C@H]1OC(=O)[C@H](C)[C@@H](O[C@H]2C[C@@](C)(OC)[C@       | 1 |
| CC(CCC1=CC=C(C=C1)O)NCCC2=CC(=C(C=C2)O)O                   | 0 |
| CC1(C(=[N+])(C2=C1C3=CC=CC=C3C=C2)CCCCS(=O)(=O)[O-])C=CC=C | 0 |
| CC12CCC3C(C1CCC2(C)O)CCC4C3(CC(=CO)C(=O)C4)C               | 1 |
| CCCC(CCC)C(O)=O                                            | 1 |
| C[C@](N)(Cc1ccc(O)c(O)c1)C(O)=O                            | 1 |
| CC1CN(CCC1(C)C2=CC(=CC=C2)O)CC(CC3=CC=CC=C3)C(=O)NCC(=O)   | 0 |
| Nc1ncn(C2OC(CO)C(O)C2O)c(=O)n1                             | 1 |
